# Supplementary material for: Synthesis and Thermal Studies of Two Phosphonium Tetrahydroxidohexaoxidopentaborate(1-) Salts: Single-Crystal XRD Characterization of [iPrPPh3][B5O6(OH)4]·3.5H2O and [MePPh3][B5O6(OH)4]·B(OH)3·0.5H2O
Source: MDPI journal article supplement (doi:10.3390/molecules28196867), 2023-09-29

---

The following ALERTS were generated. Each ALERT has the format

**test-name\_ALERT\_alert-type\_alert-level.**

Click on the hyperlinks for more details of the test.

---

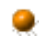

#### Alert level B

|                   |                                                  |   |         |
|-------------------|--------------------------------------------------|---|---------|
| PLAT112_ALERT_2_B | ADDSYM Detects New (Pseudo) Symm. Elem           | I | 98 %Fit |
| PLAT910_ALERT_3_B | Missing # of FCF Reflection(s) Below Theta(Min). |   | 18 Note |

---

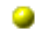

#### Alert level C

|                   |                                                  |  |              |
|-------------------|--------------------------------------------------|--|--------------|
| PLAT042_ALERT_1_C | Calc. and Reported MoietyFormula Strings Differ  |  | Please Check |
| PLAT250_ALERT_2_C | Large U3/U1 Ratio for Average U(i,j) Tensor .... |  | 2.8 Note     |
| PLAT250_ALERT_2_C | Large U3/U1 Ratio for Average U(i,j) Tensor .... |  | 2.5 Note     |
| PLAT906_ALERT_3_C | Large K Value in the Analysis of Variance .....  |  | 7.536 Check  |
| PLAT911_ALERT_3_C | Missing FCF Refl Between Thmin & STh/L= 0.600    |  | 10 Report    |
| PLAT913_ALERT_3_C | Missing # of Very Strong Reflections in FCF .... |  | 6 Note       |
| PLAT934_ALERT_3_C | Number of (Iobs-Icalc)/Sigma(W) > 10 Outliers .. |  | 1 Check      |
| PLAT975_ALERT_2_C | Check Calcd Resid. Dens. 0.90Ang From O64 .      |  | 0.55 eA-3    |
| PLAT976_ALERT_2_C | Check Calcd Resid. Dens. 0.68Ang From O64 .      |  | -0.49 eA-3   |
| PLAT976_ALERT_2_C | Check Calcd Resid. Dens. 0.52Ang From O64 .      |  | -0.49 eA-3   |
| PLAT976_ALERT_2_C | Check Calcd Resid. Dens. 0.59Ang From O65 .      |  | -0.43 eA-3   |
| PLAT976_ALERT_2_C | Check Calcd Resid. Dens. 0.68Ang From O64 .      |  | -0.43 eA-3   |
| PLAT976_ALERT_2_C | Check Calcd Resid. Dens. 0.53Ang From O66 .      |  | -0.41 eA-3   |
| PLAT992_ALERT_5_C | Repd & Actual _reflns_number_gt Values Differ by |  | 18 Check     |

---

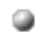

#### Alert level G

|                   |                                                              |  |             |
|-------------------|--------------------------------------------------------------|--|-------------|
| PLAT002_ALERT_2_G | Number of Distance or Angle Restraints on AtSite             |  | 1 Note      |
| PLAT007_ALERT_5_G | Number of Unrefined Donor-H Atoms .....                      |  | 22 Report   |
| PLAT045_ALERT_1_G | Calculated and Reported Z Differ by a Factor ...             |  | 0.500 Check |
| PLAT066_ALERT_1_G | Predicted and Reported Tmin&Tmax Range Identical             |  | ? Check     |
| PLAT172_ALERT_4_G | The CIF-Embedded .res File Contains DFIX Records             |  | 1 Report    |
| PLAT790_ALERT_4_G | Centre of Gravity not Within Unit Cell: Resd. #<br>B5 H4 O10 |  | 4 Note      |
| PLAT790_ALERT_4_G | Centre of Gravity not Within Unit Cell: Resd. #<br>H2 O      |  | 5 Note      |
| PLAT790_ALERT_4_G | Centre of Gravity not Within Unit Cell: Resd. #<br>H2 O      |  | 6 Note      |
| PLAT790_ALERT_4_G | Centre of Gravity not Within Unit Cell: Resd. #<br>H2 O      |  | 7 Note      |
| PLAT790_ALERT_4_G | Centre of Gravity not Within Unit Cell: Resd. #<br>H2 O      |  | 9 Note      |
| PLAT860_ALERT_3_G | Number of Least-Squares Restraints .....                     |  | 1 Note      |
| PLAT883_ALERT_1_G | No Info/Value for _atom_sites_solution_primary .             |  | Please Do ! |
| PLAT912_ALERT_4_G | Missing # of FCF Reflections Above STh/L= 0.600              |  | 112 Note    |
| PLAT933_ALERT_2_G | Number of HKL-OMIT Records in Embedded .res File             |  | 9 Note      |
| PLAT941_ALERT_3_G | Average HKL Measurement Multiplicity .....                   |  | 3.9 Low     |
| PLAT978_ALERT_2_G | Number C-C Bonds with Positive Residual Density.             |  | 2 Info      |

---

0 **ALERT level A** = Most likely a serious problem - resolve or explain

2 **ALERT level B** = A potentially serious problem, consider carefully

14 **ALERT level C** = Check. Ensure it is not caused by an omission or oversight

16 **ALERT level G** = General information/check it is not something unexpected

4 ALERT type 1 CIF construction/syntax error, inconsistent or missing data  
12 ALERT type 2 Indicator that the structure model may be wrong or deficient  
7 ALERT type 3 Indicator that the structure quality may be low  
7 ALERT type 4 Improvement, methodology, query or suggestion  
2 ALERT type 5 Informative message, check

---

It is advisable to attempt to resolve as many as possible of the alerts in all categories. Often the minor alerts point to easily fixed oversights, errors and omissions in your CIF or refinement strategy, so attention to these fine details can be worthwhile. In order to resolve some of the more serious problems it may be necessary to carry out additional measurements or structure refinements. However, the purpose of your study may justify the reported deviations and the more serious of these should normally be commented upon in the discussion or experimental section of a paper or in the "special\_details" fields of the CIF. checkCIF was carefully designed to identify outliers and unusual parameters, but every test has its limitations and alerts that are not important in a particular case may appear. Conversely, the absence of alerts does not guarantee there are no aspects of the results needing attention. It is up to the individual to critically assess their own results and, if necessary, seek expert advice.

### **Publication of your CIF in IUCr journals**

A basic structural check has been run on your CIF. These basic checks will be run on all CIFs submitted for publication in IUCr journals (*Acta Crystallographica*, *Journal of Applied Crystallography*, *Journal of Synchrotron Radiation*); however, if you intend to submit to *Acta Crystallographica Section C* or *E* or *IUCrData*, you should make sure that full publication checks are run on the final version of your CIF prior to submission.

### **Publication of your CIF in other journals**

Please refer to the *Notes for Authors* of the relevant journal for any special instructions relating to CIF submission.

---

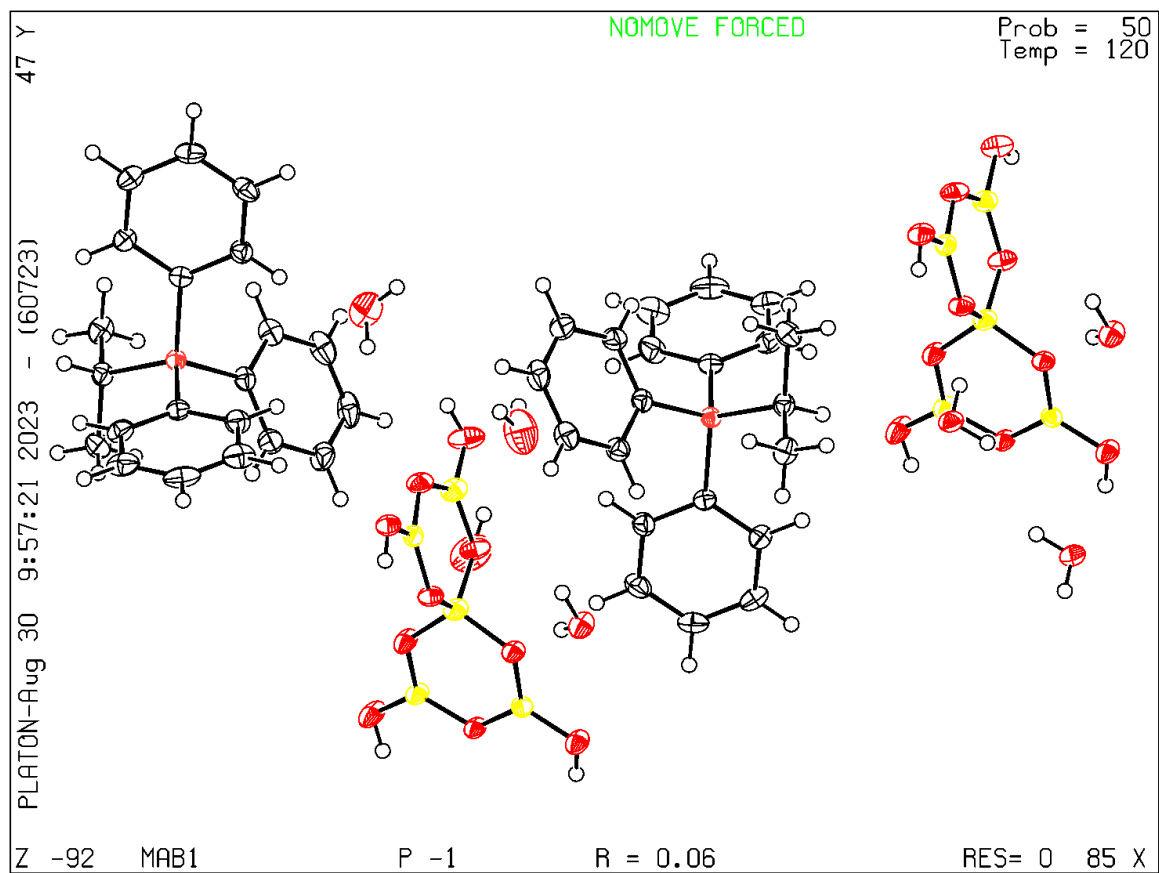

Supplement: s1 [file s1]
