# Supplementary material for: Synthesis and Thermal Studies of Two Phosphonium Tetrahydroxidohexaoxidopentaborate(1-) Salts: Single-Crystal XRD Characterization of [iPrPPh3][B5O6(OH)4]·3.5H2O and [MePPh3][B5O6(OH)4]·B(OH)3·0.5H2O
Source: MDPI journal article supplement (doi:10.3390/molecules28196867), 2023-09-29
Supplement: s1 [file s1]

## Electronic Supplementary data

Synthesis and thermal studies of two phosphonium tetrahydroxidohexaoxidopentaborate(1-) salts: single-crystal XRD characterization of [<sup>i</sup>PrPPh<sub>3</sub>][B<sub>5</sub>O<sub>6</sub>(OH)<sub>4</sub>].3.5H<sub>2</sub>O and [MePPh<sub>3</sub>][B<sub>5</sub>O<sub>6</sub>(OH)<sub>4</sub>].B(OH)<sub>3</sub>.0.5H<sub>2</sub>O

Michael A. Beckett <sup>1\*</sup>, Peter N. Horton<sup>2</sup>, Michael B. Hursthouse,<sup>b</sup> and James L Timmis,<sup>a</sup>

<sup>1</sup> School of Natural Sciences, Bangor University, Bangor, Gwynedd, LL57 2UW, UK;

<sup>2</sup> Chemistry Department, University of Southampton, Southampton, SO17 1BJ, UK;

\* Correspondence: [m.a.beckett@bangor.ac.uk](mailto:m.a.beckett@bangor.ac.uk)

Contains sc-XRD data and TGA data for [<sup>i</sup>PrPPh<sub>3</sub>][B<sub>5</sub>O<sub>6</sub>(OH)<sub>4</sub>].3.5H<sub>2</sub>O (**1**) and [MePPh<sub>3</sub>][B<sub>5</sub>O<sub>6</sub>(OH)<sub>4</sub>].B(OH)<sub>3</sub>.0.5H<sub>2</sub>O (**2**)

# [iPrPPh<sub>3</sub>][B<sub>5</sub>O<sub>6</sub>(OH)<sub>4</sub>]·3.5H<sub>2</sub>O

**$R_1=7.42\%$**

## Compound 1

Submitted by: **Mike A Beckett**  
Bangor University

Solved by: **Peter N Horton**

Sample ID: **MAB/JT/23**

## Crystal Data and Experimental

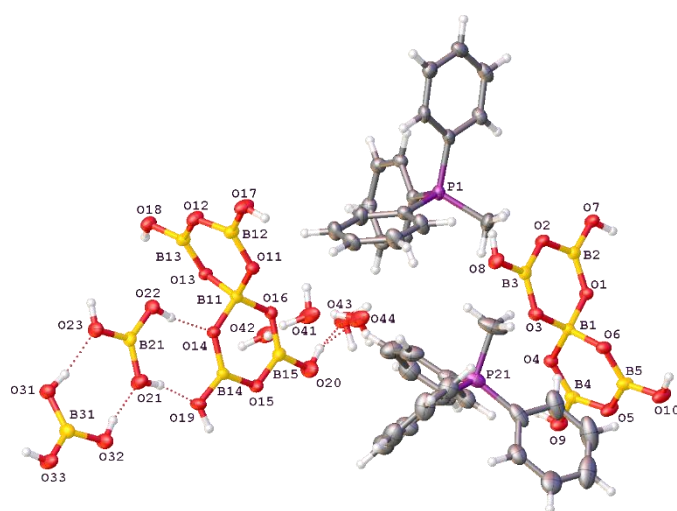

76.492(4)°,  $V = 2615.9(4) \text{ \AA}^3$ ,  $T = 120(2) \text{ K}$ ,  $Z = 2$ ,  $Z' = 1$ ,  $\mu(\text{MoK}\alpha) = 0.172 \text{ mm}^{-1}$ , 35616 reflections measured, 12083 unique ( $R_{\text{int}} = 0.0649$ ) which were used in all calculations. The final  $wR_2$  was 0.1676 (all data) and  $R_1$  was 0.0742 ( $I \geq 2 \sigma(I)$ ).

**Experimental.** Single colourless cut block-shaped crystals of **2009src0115 (1)** were used as supplied. A suitable crystal with dimensions  $0.200 \times 0.130 \times 0.070 \text{ mm}^3$  was selected and mounted on a Bruker-Nonius APEX II CCD camera on  $\kappa$ -goniostat diffractometer. The crystal was kept at a steady  $T = 120(2) \text{ K}$  during data collection. The structure was solved with the ShelXS-97 (Sheldrick, 1997a) solution program using direct methods and by using Olex2 1.5-alpha (Dolomanov et al., 2009) as the graphical interface. The model was refined with ShelXL 2018/3 (Sheldrick, 2015) using full matrix least squares minimisation on  $F^2$ .

**Crystal Data.**  $\text{C}_{38}\text{H}_{52}\text{B}_{12}\text{O}_{27}\text{P}_2$ ,  $M_r = 1132.45$ , triclinic,  $P-1$  (No. 2),  $a = 10.1076(10) \text{ \AA}$ ,  $b = 13.0403(10) \text{ \AA}$ ,  $c = 20.6260(15) \text{ \AA}$ ,  $\alpha = 84.364(5)^\circ$ ,  $\beta = 82.811(4)^\circ$ ,  $\gamma =$

|                              |                                                                                |
|------------------------------|--------------------------------------------------------------------------------|
| <b>Compound 1</b>            | <b>2009src0115</b>                                                             |
| Formula                      | C <sub>38</sub> H <sub>52</sub> B <sub>12</sub> O <sub>27</sub> P <sub>2</sub> |
| $D_{calc.}/\text{g cm}^{-3}$ | 1.438                                                                          |
| $\mu/\text{mm}^{-1}$         | 0.172                                                                          |
| Formula Weight               | 1132.45                                                                        |
| Colour                       | colourless                                                                     |
| Shape                        | cut block-shaped                                                               |
| Size/mm <sup>3</sup>         | 0.200×0.130×0.070                                                              |
| $T/\text{K}$                 | 120(2)                                                                         |
| Crystal System               | triclinic                                                                      |
| Space Group                  | <i>P</i> -1                                                                    |
| $a/\text{\AA}$               | 10.1076(10)                                                                    |
| $b/\text{\AA}$               | 13.0403(10)                                                                    |
| $c/\text{\AA}$               | 20.6260(15)                                                                    |
| $\alpha/^\circ$              | 84.364(5)                                                                      |
| $\beta/^\circ$               | 82.811(4)                                                                      |
| $\gamma/^\circ$              | 76.492(4)                                                                      |
| $V/\text{\AA}^3$             | 2615.9(4)                                                                      |
| $Z$                          | 2                                                                              |
| $Z'$                         | 1                                                                              |
| Wavelength/ $\text{\AA}$     | 0.71073                                                                        |
| Radiation type               | MoK $\alpha$                                                                   |
| $\Theta_{min}/^\circ$        | 2.994                                                                          |
| $\Theta_{max}/^\circ$        | 27.938                                                                         |
| Measured Refl's.             | 35616                                                                          |
| Indep't Refl's               | 12083                                                                          |
| Refl's $I \geq 2 \sigma(I)$  | 9025                                                                           |
| $R_{int}$                    | 0.0649                                                                         |
| Parameters                   | 735                                                                            |
| Restraints                   | 1                                                                              |
| Largest Peak                 | 1.103                                                                          |
| Deepest Hole                 | -1.031                                                                         |
| GooF                         | 1.040                                                                          |
| $wR_2$ (all data)            | 0.1676                                                                         |
| $wR_2$                       | 0.1485                                                                         |
| $R_1$ (all data)             | 0.1044                                                                         |
| $R_1$                        | 0.0742                                                                         |

### Structure Quality Indicators

|                     |                                            |       |               |      |                     |       |                            |       |
|---------------------|--------------------------------------------|-------|---------------|------|---------------------|-------|----------------------------|-------|
| <b>Reflections:</b> | d min (MoK $\alpha$ )<br>2 $\Theta$ =55.9° | 0.76  | $I/\sigma(I)$ | 15.0 | $R_{int}$<br>m=2.95 | 6.49% | Full 50.5°<br>96% to 55.9° | 98.8  |
| <b>Refinement:</b>  | Shift                                      | 0.000 | Max Peak      | 1.1  | Min Peak            | -1.0  | GooF                       | 1.040 |

A colourless cut block-shaped crystal with dimensions 0.200 × 0.130 × 0.070 mm<sup>3</sup> was mounted. Data were collected using a Bruker-Nonius APEX II CCD camera on  $\kappa$ -goniostat diffractometer equipped with an Oxford Cryosystems low-temperature device operating at  $T = 120(2)$  K.

Data were measured using  $\phi$  &  $\omega$  scans with MoK $\alpha$  radiation. The diffraction pattern was indexed and the total number of runs and images was based on the strategy calculation from the program COLLECT (Hooft, R.W.W., 1998). The maximum resolution that was achieved was  $\Theta = 27.938^\circ$  (0.76 Å).

The unit cell was refined using DENZO (Otwinowski & Minor, 1997) & COLLECT (Hooft, R.W.W., 1998) on 1919 reflections, 5% of the observed reflections.

Data reduction, scaling and absorption corrections were performed using DENZO (Otwinowski & Minor, 1997) & COLLECT (Hooft, R.W.W., 1998). The final completeness is 98.80 % out to 27.938° in  $\Theta$  SADABS

2007/2 (Sheldrick, G.M., 2007). The absorption coefficient  $\mu$  of this material is  $0.172 \text{ mm}^{-1}$  at this wavelength ( $\lambda = 0.71073 \text{ \AA}$ ) and the minimum and maximum transmissions are 0.967 and 0.988.

The structure was solved and the space group *P*-1 (# 2) determined by the ShelXS-97 (Sheldrick, 1997a) structure solution program using direct methods and refined by full matrix least squares minimisation on  $F^2$  using version 2018/3 of ShelXL 2018/3 (Sheldrick, 2015). All non-hydrogen atoms were refined anisotropically. Hydrogen atom positions were calculated geometrically and refined using the riding model.

*\_refine\_special\_details*: There was a disordered water molecule over 4 sites (and symmetry related) for which some constraints were applied.

*\_exptl\_absorpt\_process\_details*: SADABS 2007/2 (Sheldrick, G.M., 2007)

There is a single formula unit in the asymmetric unit, which is represented by the reported sum formula. In other words: *Z* is 2 and *Z'* is 1. The moiety formula is 2(B5 H4 O10), 2(C19 H18 P), 2(B H3 O3), H2 O.

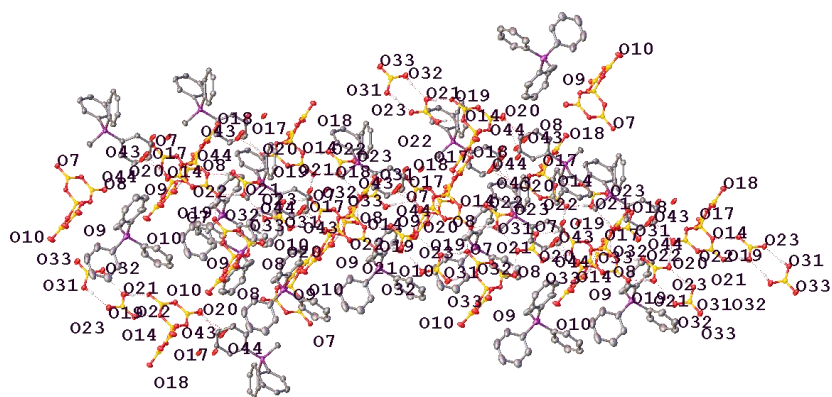

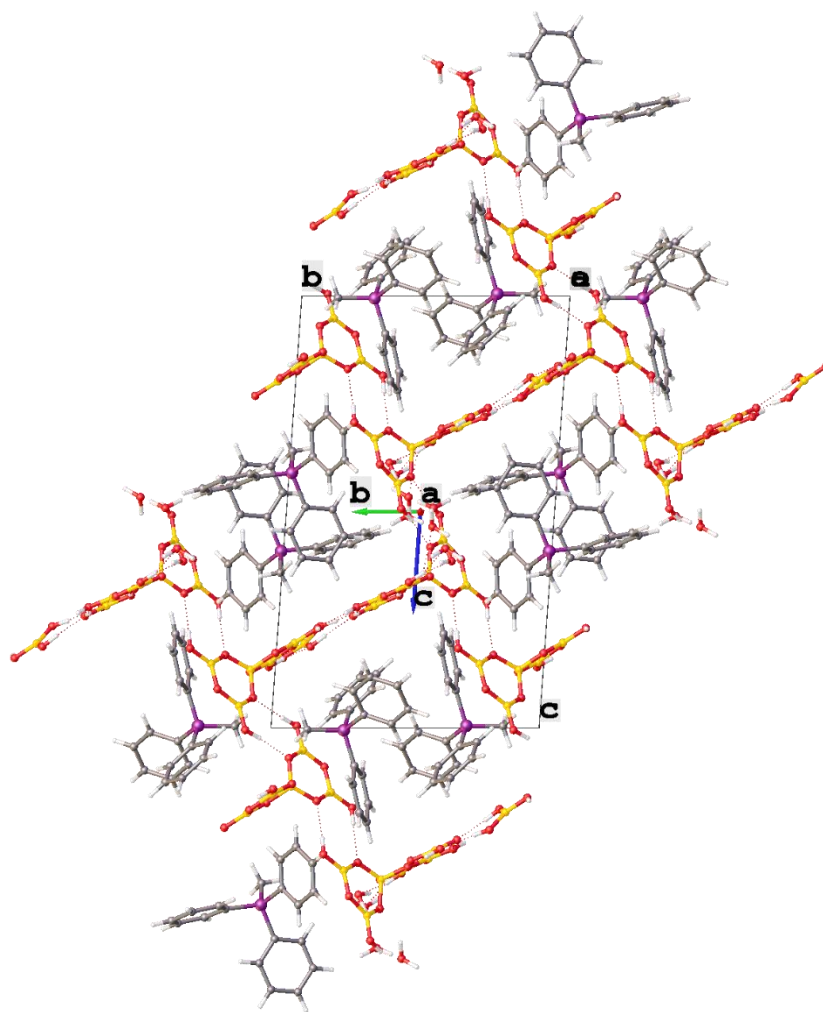

**Figure S2** Packing diagram of 2009src0115 viewed along the a axis

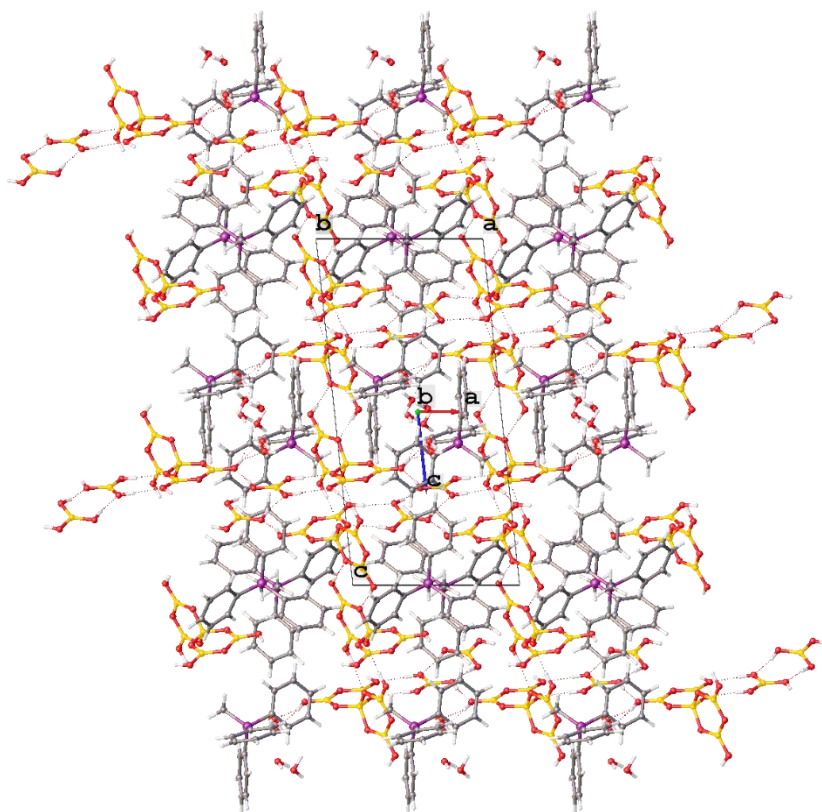

**Figure S3** Packing diagram of 2009src0115 viewed along the b axis

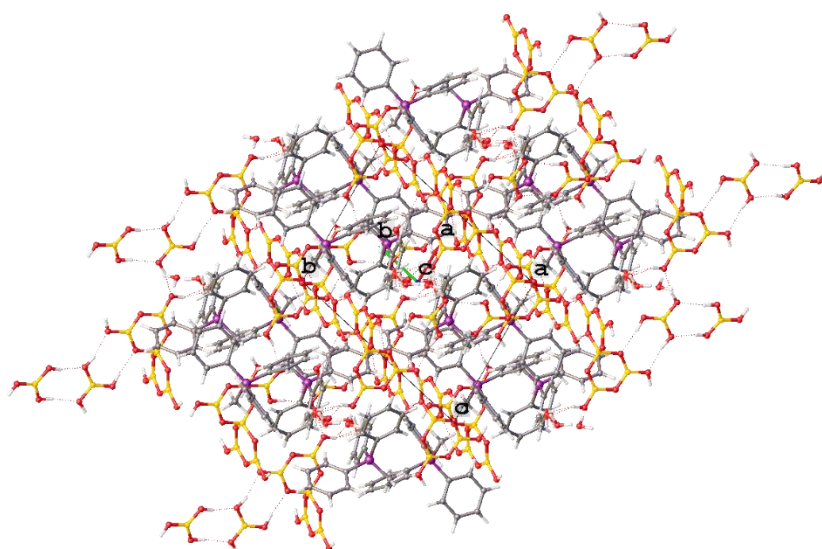

**Figure S4** Packing diagram of 2009src0115 viewed along the c axis

**Table S1:** Fractional Atomic Coordinates ( $\times 10^4$ ) and Equivalent Isotropic Displacement Parameters ( $\text{\AA}^2 \times 10^3$ ) for **2009src0115**.  $U_{eq}$  is defined as 1/3 of the trace of the orthogonalised  $U_{ij}$ .

| Atom | x         | y           | z          | $U_{eq}$  |
|------|-----------|-------------|------------|-----------|
| B1   | 724(3)    | 9085(2)     | 1353.6(16) | 18.1(6)   |
| B2   | 496(3)    | 10658(3)    | 1971.2(15) | 18.8(6)   |
| B3   | 2684(3)   | 9788(3)     | 1527.8(15) | 18.7(6)   |
| B4   | -437(4)   | 7598(3)     | 1487.6(16) | 20.6(7)   |
| B5   | -654(4)   | 8746(3)     | 515.1(17)  | 24.0(7)   |
| O1   | -71(2)    | 9965.8(15)  | 1734.1(10) | 19.8(4)   |
| O2   | 1879(2)   | 10587.2(16) | 1901.3(10) | 21.3(4)   |
| O3   | 2159(2)   | 9067.2(16)  | 1296.2(10) | 20.5(4)   |
| O4   | 449(2)    | 8100.0(15)  | 1688.8(10) | 20.1(4)   |
| O5   | -1000(2)  | 7903.4(18)  | 899.8(10)  | 28.4(5)   |
| O6   | 255(2)    | 9249.4(16)  | 696.4(9)   | 20.9(4)   |
| O7   | -280(2)   | 11473.3(17) | 2308.9(11) | 24.3(5)   |
| O8   | 4030(2)   | 9755.8(18)  | 1413.1(11) | 26.6(5)   |
| O9   | -835(2)   | 6768.2(17)  | 1843.6(11) | 27.7(5)   |
| O10  | -1242(3)  | 9043.2(19)  | -48.7(11)  | 32.2(5)   |
| B11  | 9639(3)   | 5489(3)     | 3504.2(16) | 18.5(6)   |
| B12  | 10908(4)  | 6910(3)     | 3301.9(16) | 21.7(7)   |
| B13  | 10940(3)  | 5921(3)     | 4339.0(16) | 20.2(7)   |
| B14  | 9933(3)   | 3771(2)     | 3023.0(15) | 17.5(6)   |
| B15  | 7713(4)   | 4750(3)     | 3319.3(17) | 22.6(7)   |
| O11  | 10005(2)  | 6405.1(15)  | 3119.3(10) | 20.1(4)   |
| O12  | 11450(2)  | 6637.1(17)  | 3899.9(10) | 25.8(5)   |
| O13  | 9963(2)   | 5459.6(15)  | 4187.4(9)  | 18.9(4)   |
| O14  | 10474(2)  | 4526.3(15)  | 3216.5(10) | 18.6(4)   |
| O15  | 8558(2)   | 3867.3(16)  | 3051.5(11) | 23.1(4)   |
| O16  | 8209(2)   | 5524.2(15)  | 3509.5(10) | 19.4(4)   |
| O17  | 11338(3)  | 7704.6(18)  | 2929.6(11) | 30.8(5)   |
| O18  | 11464(2)  | 5726.8(17)  | 4927.1(10) | 24.4(5)   |
| O19  | 10787(2)  | 2883.1(16)  | 2801.5(11) | 23.1(4)   |
| O20  | 6372(2)   | 4753.9(19)  | 3372.3(14) | 38.8(6)   |
| C1   | 1443(3)   | 9935(3)     | 3597.2(16) | 31.0(7)   |
| C2   | 2938(3)   | 11214(2)    | 4188.1(14) | 21.3(6)   |
| C3   | 1791(3)   | 11967(2)    | 4383.6(16) | 27.8(7)   |
| C4   | 1920(4)   | 12954(3)    | 4517.2(16) | 32.9(8)   |
| C5   | 3181(4)   | 13189(3)    | 4458.9(16) | 30.5(7)   |
| C6   | 4316(3)   | 12459(3)    | 4255.3(15) | 28.2(7)   |
| C7   | 4201(3)   | 11462(3)    | 4117.4(15) | 25.8(7)   |
| C8   | 2416(3)   | 9300(2)     | 4887.8(14) | 21.6(6)   |
| C9   | 2448(3)   | 9808(2)     | 5448.3(15) | 22.4(6)   |
| C10  | 2229(3)   | 9302(2)     | 6060.4(15) | 24.8(6)   |
| C11  | 1996(3)   | 8290(3)     | 6112.9(15) | 24.9(6)   |
| C12  | 1956(3)   | 7787(3)     | 5558.7(16) | 26.4(7)   |
| C13  | 2159(3)   | 8287(2)     | 4942.0(15) | 25.8(6)   |
| C14  | 4329(3)   | 9167(2)     | 3719.8(15) | 23.2(6)   |
| C15  | 4619(4)   | 9291(3)     | 3045.9(16) | 32.9(8)   |
| C16  | 5833(4)   | 8745(3)     | 2753.0(17) | 37.8(9)   |
| C17  | 6762(4)   | 8091(3)     | 3132.7(17) | 33.1(8)   |
| C18  | 6479(3)   | 7969(3)     | 3792.9(17) | 32.9(8)   |
| C19  | 5266(3)   | 8504(3)     | 4091.0(16) | 29.4(7)   |
| P1   | 2782.9(8) | 9903.2(6)   | 4091.9(4)  | 21.23(17) |
| C21  | 5479(5)   | 8645(3)     | 43(2)      | 53.4(12)  |
| C22  | 4182(4)   | 7103(3)     | -416.9(18) | 39.3(9)   |
| C23  | 4480(4)   | 6349(3)     | -883.1(18) | 37.1(8)   |
| C24  | 3499(4)   | 6210(3)     | -1252(2)   | 46.2(10)  |
| C25  | 2200(5)   | 6820(4)     | -1160(2)   | 63.1(15)  |
| C26  | 1896(5)   | 7569(4)     | -700(2)    | 67.0(15)  |
| C27  | 2868(4)   | 7719(4)     | -329(2)    | 54.4(12)  |
| C28  | 5150(4)   | 6788(3)     | 878.3(17)  | 33.1(8)   |
| C29  | 3940(4)   | 6475(3)     | 1094.6(18) | 34.7(8)   |

| Atom | x          | y          | z           | $U_{eq}$ |
|------|------------|------------|-------------|----------|
| C30  | 3696(4)    | 6175(3)    | 1750.2(19)  | 40.7(9)  |
| C31  | 4630(4)    | 6184(3)    | 2178(2)     | 43.9(9)  |
| C32  | 5839(4)    | 6477(3)    | 1959.1(19)  | 43.9(9)  |
| C33  | 6090(4)    | 6797(3)    | 1305.9(19)  | 40.7(9)  |
| C34  | 7034(4)    | 6566(3)    | -307.2(17)  | 31.9(7)  |
| C35  | 7682(4)    | 7027(3)    | -852.6(18)  | 40.5(9)  |
| C36  | 8805(4)    | 6438(4)    | -1178.9(19) | 49.8(11) |
| C37  | 9298(4)    | 5397(4)    | -977.0(19)  | 45.8(10) |
| C38  | 8674(4)    | 4934(3)    | -434(2)     | 42.7(9)  |
| C39  | 7537(4)    | 5518(3)    | -98.7(19)   | 38.5(9)  |
| P21  | 5461.1(10) | 7279.1(7)  | 50.5(5)     | 33.9(2)  |
| B21  | 13973(3)   | 3538(3)    | 2828.6(17)  | 21.4(7)  |
| O21  | 13483(2)   | 2766.1(18) | 2592.5(12)  | 30.1(5)  |
| O22  | 13187(2)   | 4426.4(16) | 3070.1(11)  | 24.2(5)  |
| O23  | 15345(2)   | 3365.8(17) | 2800.9(11)  | 26.9(5)  |
| B31  | 16446(4)   | 1037(3)    | 1954.3(18)  | 25.0(7)  |
| O31  | 16996(2)   | 1576.6(17) | 2357.6(11)  | 26.5(5)  |
| O32  | 15094(2)   | 1259.1(18) | 1881.6(12)  | 30.3(5)  |
| O33  | 17238(2)   | 252.4(19)  | 1616.4(12)  | 33.8(6)  |
| O42  | 5273(10)   | 4515(7)    | 5343(3)     | 42.6(17) |
| O41  | 4373(11)   | 5477(8)    | 5093(3)     | 42.6(17) |
| O43  | 4513(4)    | 6026(4)    | 4149(3)     | 42.6(17) |
| O44  | 4456(5)    | 6289(4)    | 3863(3)     | 42.6(17) |

**Table S2:** Anisotropic Displacement Parameters ( $\times 10^4$ ) for **2009src0115**. The anisotropic displacement factor exponent takes the form:  $-2\pi^2[h^2a^{*2} \times U_{11} + \dots + 2hka^* \times b^* \times U_{12}]$

| Atom | $U_{11}$ | $U_{22}$ | $U_{33}$ | $U_{23}$  | $U_{13}$  | $U_{12}$  |
|------|----------|----------|----------|-----------|-----------|-----------|
| B1   | 19.8(16) | 15.8(15) | 19.2(15) | -2.2(12)  | -2.1(12)  | -4.5(12)  |
| B2   | 20.0(16) | 19.5(15) | 16.8(15) | -1.4(12)  | -1.5(12)  | -4.3(12)  |
| B3   | 19.4(16) | 20.6(15) | 15.8(14) | 1.7(12)   | -1.0(12)  | -5.7(12)  |
| B4   | 24.6(17) | 19.5(16) | 17.8(15) | -2.1(13)  | 1.8(12)   | -7.0(13)  |
| B5   | 31.6(19) | 23.2(17) | 19.8(16) | -2.0(14)  | -1.7(14)  | -11.9(14) |
| O1   | 16.7(10) | 20.2(10) | 22.8(10) | -6.3(8)   | 0.0(8)    | -4.0(8)   |
| O2   | 17.6(10) | 23.9(10) | 24.6(10) | -6.4(9)   | -2.8(8)   | -6.9(8)   |
| O3   | 17.9(10) | 20.5(10) | 23.2(10) | -5.1(8)   | 1.9(8)    | -5.2(8)   |
| O4   | 21.9(10) | 18.8(10) | 20.2(10) | -1.3(8)   | -1.0(8)   | -6.4(8)   |
| O5   | 37.3(13) | 30.5(12) | 24.7(11) | 3.6(9)    | -9.1(9)   | -21.8(10) |
| O6   | 25.5(11) | 19.9(10) | 18.5(10) | -2.1(8)   | -0.5(8)   | -8.5(8)   |
| O7   | 17.9(10) | 26.6(11) | 30.0(11) | -11.2(9)  | -3.0(9)   | -4.4(9)   |
| O8   | 17.9(11) | 33.6(12) | 29.9(12) | -6.5(10)  | 0.5(9)    | -9.0(9)   |
| O9   | 35.9(13) | 26.8(11) | 25.1(11) | 2.2(9)    | -4.7(10)  | -17.2(10) |
| O10  | 47.0(15) | 33.5(13) | 24.2(11) | 4.6(10)   | -12.5(10) | -23.7(11) |
| B11  | 19.9(16) | 17.2(15) | 18.4(15) | -0.1(12)  | -3.0(12)  | -4.3(12)  |
| B12  | 24.2(17) | 24.1(17) | 18.3(15) | -3.2(13)  | -1.3(13)  | -8.3(13)  |
| B13  | 21.3(16) | 21.6(16) | 18.4(15) | -3.8(13)  | -0.6(12)  | -6.2(13)  |
| B14  | 18.6(15) | 16.9(15) | 16.9(14) | -1.8(12)  | -1.5(12)  | -3.5(12)  |
| B15  | 20.9(17) | 22.5(16) | 25.8(17) | -0.7(14)  | -5.3(13)  | -6.2(13)  |
| O11  | 22.0(11) | 18.2(10) | 20.7(10) | -0.1(8)   | -3.0(8)   | -5.9(8)   |
| O12  | 28.2(12) | 32.8(12) | 21.1(10) | -1.1(9)   | -3.1(9)   | -16.4(10) |
| O13  | 22.5(10) | 18.0(10) | 17.7(9)  | -1.5(8)   | -2.7(8)   | -7.3(8)   |
| O14  | 16.1(10) | 18.1(10) | 22.5(10) | -4.9(8)   | -1.4(8)   | -4.6(8)   |
| O15  | 16.7(10) | 19.6(10) | 34.5(12) | -5.7(9)   | -4.1(9)   | -4.6(8)   |
| O16  | 15.9(10) | 17.7(10) | 24.4(10) | -3.6(8)   | -1.7(8)   | -2.5(8)   |
| O17  | 43.3(14) | 33.8(12) | 22.3(11) | 1.2(10)   | -4.3(10)  | -23.8(11) |
| O18  | 27.4(12) | 27.8(12) | 21.1(10) | -0.4(9)   | -4.6(9)   | -12.1(9)  |
| O19  | 20.6(11) | 19.5(10) | 30.2(11) | -9.9(9)   | 1.2(9)    | -5.1(8)   |
| O20  | 16.6(11) | 34.5(14) | 66.6(18) | -14.6(13) | -4.3(11)  | -3.8(10)  |
| C1   | 24.2(16) | 38.5(19) | 30.3(17) | -2.4(15)  | -10.5(13) | -3.1(14)  |
| C2   | 21.6(15) | 21.0(14) | 18.1(13) | 1.0(11)   | -2.2(11)  | 0.6(11)   |



| Atom | $U_{11}$ | $U_{22}$ | $U_{33}$ | $U_{23}$  | $U_{13}$ | $U_{12}$  |
|------|----------|----------|----------|-----------|----------|-----------|
| C3   | 25.7(16) | 24.6(16) | 29.7(17) | 2.4(13)   | -0.4(13) | -1.6(13)  |
| C4   | 34.8(19) | 25.7(16) | 29.6(17) | -0.2(14)  | 3.2(14)  | 6.5(14)   |
| C5   | 42(2)    | 21.9(16) | 25.9(16) | -0.5(13)  | -4.7(14) | -3.8(14)  |
| C6   | 30.2(17) | 30.3(17) | 24.7(16) | 3.7(13)   | -6.9(13) | -8.3(14)  |
| C7   | 20.7(15) | 28.4(16) | 24.5(15) | -0.7(13)  | -3.9(12) | 2.5(12)   |
| C8   | 17.7(14) | 23.3(15) | 22.2(14) | -1.0(12)  | -1.3(11) | -2.1(11)  |
| C9   | 21.0(15) | 20.2(14) | 25.6(15) | -4.1(12)  | 0.8(12)  | -4.3(11)  |
| C10  | 23.7(15) | 26.9(16) | 23.5(15) | -3.7(13)  | -0.2(12) | -5.4(12)  |
| C11  | 19.9(15) | 30.3(16) | 23.3(15) | 0.8(13)   | 1.7(12)  | -6.6(12)  |
| C12  | 23.1(16) | 24.5(15) | 31.9(17) | -1.1(13)  | 1.0(13)  | -8.3(12)  |
| C13  | 24.7(16) | 28.5(16) | 24.6(15) | -8.1(13)  | 0.8(12)  | -6.1(13)  |
| C14  | 23.8(15) | 21.3(14) | 23.2(15) | -3.7(12)  | -0.5(12) | -2.7(12)  |
| C15  | 33.5(18) | 31.9(18) | 25.3(16) | 1.5(14)   | 1.8(14)  | 4.6(14)   |
| C16  | 41(2)    | 35.9(19) | 27.3(17) | -2.3(15)  | 7.2(15)  | 3.9(16)   |
| C17  | 30.4(18) | 27.7(17) | 35.4(18) | -7.7(14)  | 6.1(14)  | 2.4(14)   |
| C18  | 27.2(17) | 33.3(18) | 32.9(18) | -4.0(15)  | -4.9(14) | 5.6(14)   |
| C19  | 26.4(17) | 36.1(18) | 22.7(15) | -4.0(14)  | -3.3(13) | 0.0(14)   |
| P1   | 18.8(4)  | 23.6(4)  | 19.7(4)  | -1.8(3)   | -2.1(3)  | -1.5(3)   |
| C21  | 80(3)    | 25.0(18) | 51(2)    | -8.4(18)  | 26(2)    | -19(2)    |
| C22  | 40(2)    | 28.1(18) | 37.0(19) | 12.3(15)  | 14.6(16) | 2.5(15)   |
| C23  | 33.5(19) | 31.4(18) | 42(2)    | 8.6(16)   | 3.8(16)  | -7.6(15)  |
| C24  | 50(2)    | 45(2)    | 43(2)    | 18.6(19)  | -2.0(18) | -19.1(19) |
| C25  | 41(2)    | 90(4)    | 51(3)    | 39(3)     | -8(2)    | -18(2)    |
| C26  | 39(3)    | 84(4)    | 55(3)    | 25(3)     | 10(2)    | 13(2)     |
| C27  | 45(2)    | 62(3)    | 38(2)    | 16(2)     | 7.5(18)  | 9(2)      |
| C28  | 40(2)    | 24.6(16) | 31.7(18) | -2.4(14)  | 12.0(15) | -10.0(14) |
| C29  | 31.0(18) | 32.4(18) | 36.2(19) | 1.2(15)   | 7.3(15)  | -5.5(14)  |
| C30  | 34(2)    | 40(2)    | 41(2)    | 8.8(17)   | 11.9(16) | -7.5(16)  |
| C31  | 45(2)    | 44(2)    | 39(2)    | 0.2(18)   | 7.4(17)  | -9.7(18)  |
| C32  | 55(3)    | 46(2)    | 37(2)    | -4.8(18)  | -0.9(18) | -24.7(19) |
| C33  | 49(2)    | 36(2)    | 41(2)    | -10.3(17) | 10.9(17) | -21.9(17) |
| C34  | 35.8(19) | 30.4(17) | 30.6(17) | -6.9(14)  | 8.1(14)  | -13.8(15) |
| C35  | 38(2)    | 50(2)    | 31.4(19) | 4.8(17)   | 3.7(15)  | -14.7(17) |
| C36  | 36(2)    | 77(3)    | 30.3(19) | 9(2)      | 8.1(16)  | -11(2)    |
| C37  | 34(2)    | 66(3)    | 34(2)    | -11.5(19) | 4.0(16)  | -6.8(19)  |
| C38  | 35(2)    | 39(2)    | 53(2)    | -7.0(18)  | 2.4(17)  | -7.9(16)  |
| C39  | 40(2)    | 33.1(19) | 40(2)    | -0.2(16)  | 10.3(16) | -13.0(16) |
| P21  | 42.3(5)  | 22.6(4)  | 32.7(5)  | -1.0(4)   | 12.9(4)  | -8.4(4)   |
| B21  | 14.5(15) | 23.9(16) | 25.7(17) | -0.1(14)  | -1.2(12) | -5.2(13)  |
| O21  | 20.8(11) | 34.5(13) | 37.8(13) | -12.3(10) | -1.8(10) | -8.3(10)  |
| O22  | 15.7(10) | 25.2(11) | 32.0(12) | -5.0(9)   | 0.5(9)   | -5.8(8)   |
| O23  | 16.0(10) | 29.3(12) | 35.2(13) | -7.5(10)  | 0.2(9)   | -3.8(9)   |
| B31  | 19.3(17) | 26.2(18) | 29.2(18) | -3.6(15)  | 0.8(14)  | -5.5(13)  |
| O31  | 20.7(11) | 27.0(12) | 31.7(12) | -8.8(10)  | -0.8(9)  | -3.3(9)   |
| O32  | 17.5(11) | 29.0(12) | 44.3(14) | -11.8(10) | 1.0(10)  | -3.7(9)   |
| O33  | 17.3(11) | 38.0(13) | 48.8(15) | -21.2(11) | -0.5(10) | -5.4(10)  |
| O42  | 16(2)    | 51(3)    | 63(5)    | -36(3)    | 4(3)     | -3(2)     |
| O41  | 16(2)    | 51(3)    | 63(5)    | -36(3)    | 4(3)     | -3(2)     |
| O43  | 16(2)    | 51(3)    | 63(5)    | -36(3)    | 4(3)     | -3(2)     |
| O44  | 16(2)    | 51(3)    | 63(5)    | -36(3)    | 4(3)     | -3(2)     |

**Table S3:** Bond Lengths in Å for **2009src0115**.

| Atom | Atom | Length/Å | Atom | Atom | Length/Å |
|------|------|----------|------|------|----------|
| B1   | O1   | 1.473(4) | B2   | O7   | 1.360(4) |
| B1   | O3   | 1.435(4) | B3   | O2   | 1.395(4) |
| B1   | O4   | 1.466(4) | B3   | O3   | 1.334(4) |
| B1   | O6   | 1.471(4) | B3   | O8   | 1.342(4) |
| B2   | O1   | 1.335(4) | B4   | O4   | 1.350(4) |
| B2   | O2   | 1.369(4) | B4   | O5   | 1.387(4) |

| Atom | Atom | Length/Å |
|------|------|----------|
| B4   | O9   | 1.359(4) |
| B5   | O5   | 1.378(4) |
| B5   | O6   | 1.353(4) |
| B5   | O10  | 1.353(4) |
| B11  | O11  | 1.463(4) |
| B11  | O13  | 1.481(4) |
| B11  | O14  | 1.472(4) |
| B11  | O16  | 1.434(4) |
| B12  | O11  | 1.351(4) |
| B12  | O12  | 1.393(4) |
| B12  | O17  | 1.350(4) |
| B13  | O12  | 1.378(4) |
| B13  | O13  | 1.351(4) |
| B13  | O18  | 1.361(4) |
| B14  | O14  | 1.346(4) |
| B14  | O15  | 1.361(4) |
| B14  | O19  | 1.354(4) |
| B15  | O15  | 1.381(4) |
| B15  | O16  | 1.337(4) |
| B15  | O20  | 1.346(4) |
| C1   | P1   | 1.785(3) |
| C2   | C3   | 1.379(4) |
| C2   | C7   | 1.375(4) |
| C2   | P1   | 1.785(3) |
| C3   | C4   | 1.380(5) |
| C4   | C5   | 1.368(5) |
| C5   | C6   | 1.359(5) |
| C6   | C7   | 1.392(5) |
| C8   | C9   | 1.395(4) |
| C8   | C13  | 1.396(4) |
| C8   | P1   | 1.784(3) |
| C9   | C10  | 1.383(4) |
| C10  | C11  | 1.386(4) |
| C11  | C12  | 1.382(4) |
| C12  | C13  | 1.386(4) |

| Atom | Atom | Length/Å |
|------|------|----------|
| C14  | C15  | 1.386(4) |
| C14  | C19  | 1.378(4) |
| C14  | P1   | 1.760(3) |
| C15  | C16  | 1.367(5) |
| C16  | C17  | 1.378(5) |
| C17  | C18  | 1.357(5) |
| C18  | C19  | 1.365(4) |
| C21  | P21  | 1.784(4) |
| C22  | C23  | 1.399(5) |
| C22  | C27  | 1.382(5) |
| C22  | P21  | 1.774(5) |
| C23  | C24  | 1.376(6) |
| C24  | C25  | 1.368(6) |
| C25  | C26  | 1.385(8) |
| C26  | C27  | 1.377(7) |
| C28  | C29  | 1.386(5) |
| C28  | C33  | 1.378(5) |
| C28  | P21  | 1.780(3) |
| C29  | C30  | 1.379(5) |
| C30  | C31  | 1.373(6) |
| C31  | C32  | 1.375(5) |
| C32  | C33  | 1.381(5) |
| C34  | C35  | 1.387(5) |
| C34  | C39  | 1.387(5) |
| C34  | P21  | 1.757(4) |
| C35  | C36  | 1.355(5) |
| C36  | C37  | 1.374(6) |
| C37  | C38  | 1.373(5) |
| C38  | C39  | 1.369(5) |
| B21  | O21  | 1.373(4) |
| B21  | O22  | 1.344(4) |
| B21  | O23  | 1.347(4) |
| B31  | O31  | 1.382(4) |
| B31  | O32  | 1.354(4) |
| B31  | O33  | 1.339(4) |

**Table S4:** Bond Angles in ° for **2009src0115**.

| Atom | Atom | Atom | Angle/°  |
|------|------|------|----------|
| O3   | B1   | O1   | 110.9(2) |
| O3   | B1   | O4   | 110.7(2) |
| O3   | B1   | O6   | 109.2(2) |
| O4   | B1   | O1   | 107.8(2) |
| O4   | B1   | O6   | 110.7(2) |
| O6   | B1   | O1   | 107.5(2) |
| O1   | B2   | O2   | 122.7(3) |
| O1   | B2   | O7   | 121.3(3) |
| O7   | B2   | O2   | 116.0(3) |
| O3   | B3   | O2   | 122.1(3) |
| O3   | B3   | O8   | 120.3(3) |
| O8   | B3   | O2   | 117.6(3) |
| O4   | B4   | O5   | 121.7(3) |
| O4   | B4   | O9   | 122.6(3) |
| O9   | B4   | O5   | 115.8(3) |
| O6   | B5   | O5   | 120.6(3) |
| O6   | B5   | O10  | 121.5(3) |
| O10  | B5   | O5   | 117.9(3) |
| B2   | O1   | B1   | 123.2(2) |
| B2   | O2   | B3   | 116.7(2) |
| B3   | O3   | B1   | 124.1(2) |

| Atom | Atom | Atom | Angle/°  |
|------|------|------|----------|
| B4   | O4   | B1   | 122.3(2) |
| B5   | O5   | B4   | 119.0(3) |
| B5   | O6   | B1   | 123.1(2) |
| O11  | B11  | O13  | 110.4(2) |
| O11  | B11  | O14  | 108.2(2) |
| O14  | B11  | O13  | 107.7(2) |
| O16  | B11  | O11  | 110.8(2) |
| O16  | B11  | O13  | 109.0(2) |
| O16  | B11  | O14  | 110.7(2) |
| O11  | B12  | O12  | 121.1(3) |
| O17  | B12  | O11  | 123.2(3) |
| O17  | B12  | O12  | 115.7(3) |
| O13  | B13  | O12  | 121.0(3) |
| O13  | B13  | O18  | 122.9(3) |
| O18  | B13  | O12  | 116.1(3) |
| O14  | B14  | O15  | 122.1(3) |
| O14  | B14  | O19  | 118.8(3) |
| O19  | B14  | O15  | 119.1(3) |
| O16  | B15  | O15  | 121.9(3) |
| O16  | B15  | O20  | 123.7(3) |
| O20  | B15  | O15  | 114.3(3) |

| Atom | Atom | Atom | Angle/°    | Atom | Atom | Atom | Angle/°    |
|------|------|------|------------|------|------|------|------------|
| B12  | O11  | B11  | 122.3(2)   | C23  | C22  | P21  | 121.0(3)   |
| B13  | O12  | B12  | 119.0(2)   | C27  | C22  | C23  | 118.7(4)   |
| B13  | O13  | B11  | 121.6(2)   | C27  | C22  | P21  | 120.3(3)   |
| B14  | O14  | B11  | 123.1(2)   | C24  | C23  | C22  | 121.5(4)   |
| B14  | O15  | B15  | 117.8(2)   | C25  | C24  | C23  | 119.3(5)   |
| B15  | O16  | B11  | 124.2(2)   | C24  | C25  | C26  | 119.5(5)   |
| C3   | C2   | P1   | 119.6(2)   | C27  | C26  | C25  | 121.8(4)   |
| C7   | C2   | C3   | 119.4(3)   | C26  | C27  | C22  | 119.1(5)   |
| C7   | C2   | P1   | 120.8(2)   | C29  | C28  | P21  | 120.3(3)   |
| C2   | C3   | C4   | 119.9(3)   | C33  | C28  | C29  | 121.0(3)   |
| C5   | C4   | C3   | 120.4(3)   | C33  | C28  | P21  | 118.5(3)   |
| C6   | C5   | C4   | 120.1(3)   | C30  | C29  | C28  | 118.4(4)   |
| C5   | C6   | C7   | 120.0(3)   | C31  | C30  | C29  | 120.8(4)   |
| C2   | C7   | C6   | 120.0(3)   | C30  | C31  | C32  | 120.7(4)   |
| C9   | C8   | C13  | 120.3(3)   | C31  | C32  | C33  | 119.3(4)   |
| C9   | C8   | P1   | 120.8(2)   | C28  | C33  | C32  | 119.8(4)   |
| C13  | C8   | P1   | 118.8(2)   | C35  | C34  | C39  | 120.3(3)   |
| C10  | C9   | C8   | 119.8(3)   | C35  | C34  | P21  | 118.6(3)   |
| C9   | C10  | C11  | 119.8(3)   | C39  | C34  | P21  | 120.6(3)   |
| C12  | C11  | C10  | 120.6(3)   | C36  | C35  | C34  | 119.0(4)   |
| C11  | C12  | C13  | 120.3(3)   | C35  | C36  | C37  | 120.8(4)   |
| C12  | C13  | C8   | 119.2(3)   | C38  | C37  | C36  | 120.7(4)   |
| C15  | C14  | P1   | 119.0(2)   | C39  | C38  | C37  | 119.2(4)   |
| C19  | C14  | C15  | 120.1(3)   | C38  | C39  | C34  | 120.0(3)   |
| C19  | C14  | P1   | 120.9(2)   | C22  | P21  | C21  | 110.8(2)   |
| C16  | C15  | C14  | 119.5(3)   | C22  | P21  | C28  | 110.34(17) |
| C15  | C16  | C17  | 119.6(3)   | C28  | P21  | C21  | 108.37(18) |
| C18  | C17  | C16  | 120.9(3)   | C34  | P21  | C21  | 110.39(19) |
| C17  | C18  | C19  | 120.1(3)   | C34  | P21  | C22  | 106.82(17) |
| C18  | C19  | C14  | 119.8(3)   | C34  | P21  | C28  | 110.10(17) |
| C2   | P1   | C1   | 110.34(15) | O22  | B21  | O21  | 124.7(3)   |
| C8   | P1   | C1   | 110.33(15) | O22  | B21  | O23  | 119.7(3)   |
| C8   | P1   | C2   | 107.74(14) | O23  | B21  | O21  | 115.6(3)   |
| C14  | P1   | C1   | 109.16(16) | O32  | B31  | O31  | 122.6(3)   |
| C14  | P1   | C2   | 110.16(14) | O33  | B31  | O31  | 121.0(3)   |
| C14  | P1   | C8   | 109.09(14) | O33  | B31  | O32  | 116.4(3)   |

**Table S5:** Torsion Angles in ° for **2009src0115**.

| Atom | Atom | Atom | Atom | Angle/°   |
|------|------|------|------|-----------|
| O1   | B1   | O3   | B3   | -3.3(4)   |
| O1   | B1   | O4   | B4   | 100.5(3)  |
| O1   | B1   | O6   | B5   | -99.0(3)  |
| O1   | B2   | O2   | B3   | 4.2(4)    |
| O2   | B2   | O1   | B1   | -2.4(4)   |
| O2   | B3   | O3   | B1   | 5.7(4)    |
| O3   | B1   | O1   | B2   | 1.7(4)    |
| O3   | B1   | O4   | B4   | -138.0(3) |
| O3   | B1   | O6   | B5   | 140.6(3)  |
| O3   | B3   | O2   | B2   | -5.7(4)   |
| O4   | B1   | O1   | B2   | 123.1(3)  |
| O4   | B1   | O3   | B3   | -123.0(3) |
| O4   | B1   | O6   | B5   | 18.5(4)   |
| O4   | B4   | O5   | B5   | -0.6(5)   |
| O5   | B4   | O4   | B1   | 9.0(4)    |
| O5   | B5   | O6   | B1   | -12.2(5)  |
| O6   | B1   | O1   | B2   | -117.6(3) |
| O6   | B1   | O3   | B3   | 114.9(3)  |
| O6   | B1   | O4   | B4   | -16.8(4)  |
| O6   | B5   | O5   | B4   | 2.1(5)    |

| Atom | Atom | Atom | Atom | Angle/°   |
|------|------|------|------|-----------|
| O7   | B2   | O1   | B1   | 178.6(3)  |
| O7   | B2   | O2   | B3   | -176.8(2) |
| O8   | B3   | O2   | B2   | 175.2(3)  |
| O8   | B3   | O3   | B1   | -175.3(3) |
| O9   | B4   | O4   | B1   | -171.0(3) |
| O9   | B4   | O5   | B5   | 179.4(3)  |
| O10  | B5   | O5   | B4   | -178.5(3) |
| O10  | B5   | O6   | B1   | 168.5(3)  |
| O11  | B11  | O13  | B13  | -25.2(4)  |
| O11  | B11  | O14  | B14  | -125.0(3) |
| O11  | B11  | O16  | B15  | 124.3(3)  |
| O11  | B12  | O12  | B13  | -7.1(4)   |
| O12  | B12  | O11  | B11  | -5.6(4)   |
| O12  | B13  | O13  | B11  | 15.1(4)   |
| O13  | B11  | O11  | B12  | 20.4(4)   |
| O13  | B11  | O14  | B14  | 115.8(3)  |
| O13  | B11  | O16  | B15  | -114.1(3) |
| O13  | B13  | O12  | B12  | 2.3(4)    |
| O14  | B11  | O11  | B12  | -97.1(3)  |
| O14  | B11  | O13  | B13  | 92.7(3)   |
| O14  | B11  | O16  | B15  | 4.2(4)    |
| O14  | B14  | O15  | B15  | -3.3(4)   |
| O15  | B14  | O14  | B11  | 3.2(4)    |
| O15  | B15  | O16  | B11  | -4.9(5)   |
| O16  | B11  | O11  | B12  | 141.3(3)  |
| O16  | B11  | O13  | B13  | -147.1(3) |
| O16  | B11  | O14  | B14  | -3.3(4)   |
| O16  | B15  | O15  | B14  | 4.1(4)    |
| O17  | B12  | O11  | B11  | 174.8(3)  |
| O17  | B12  | O12  | B13  | 172.5(3)  |
| O18  | B13  | O12  | B12  | -176.8(3) |
| O18  | B13  | O13  | B11  | -165.8(3) |
| O19  | B14  | O14  | B11  | -176.0(2) |
| O19  | B14  | O15  | B15  | 175.8(3)  |
| O20  | B15  | O15  | B14  | -175.6(3) |
| O20  | B15  | O16  | B11  | 174.8(3)  |
| C2   | C3   | C4   | C5   | -0.2(5)   |
| C3   | C2   | C7   | C6   | 1.3(5)    |
| C3   | C2   | P1   | C1   | 50.2(3)   |
| C3   | C2   | P1   | C8   | -70.3(3)  |
| C3   | C2   | P1   | C14  | 170.8(2)  |
| C3   | C4   | C5   | C6   | 1.4(5)    |
| C4   | C5   | C6   | C7   | -1.2(5)   |
| C5   | C6   | C7   | C2   | -0.1(5)   |
| C7   | C2   | C3   | C4   | -1.1(5)   |
| C7   | C2   | P1   | C1   | -134.7(3) |
| C7   | C2   | P1   | C8   | 104.8(3)  |
| C7   | C2   | P1   | C14  | -14.1(3)  |
| C8   | C9   | C10  | C11  | 0.7(5)    |
| C9   | C8   | C13  | C12  | -1.0(5)   |
| C9   | C8   | P1   | C1   | -127.6(3) |
| C9   | C8   | P1   | C2   | -7.0(3)   |
| C9   | C8   | P1   | C14  | 112.5(3)  |
| C9   | C10  | C11  | C12  | -1.1(5)   |
| C10  | C11  | C12  | C13  | 0.4(5)    |
| C11  | C12  | C13  | C8   | 0.6(5)    |
| C13  | C8   | C9   | C10  | 0.3(4)    |
| C13  | C8   | P1   | C1   | 55.4(3)   |
| C13  | C8   | P1   | C2   | 175.9(2)  |
| C13  | C8   | P1   | C14  | -64.5(3)  |
| C14  | C15  | C16  | C17  | -1.0(6)   |
| C15  | C14  | C19  | C18  | 0.0(5)    |

| Atom | Atom | Atom | Atom | Angle/°   |
|------|------|------|------|-----------|
| C15  | C14  | P1   | C1   | 40.7(3)   |
| C15  | C14  | P1   | C2   | -80.6(3)  |
| C15  | C14  | P1   | C8   | 161.3(3)  |
| C15  | C16  | C17  | C18  | 1.1(6)    |
| C16  | C17  | C18  | C19  | -0.6(6)   |
| C17  | C18  | C19  | C14  | 0.1(5)    |
| C19  | C14  | C15  | C16  | 0.5(5)    |
| C19  | C14  | P1   | C1   | -141.6(3) |
| C19  | C14  | P1   | C2   | 97.1(3)   |
| C19  | C14  | P1   | C8   | -21.0(3)  |
| P1   | C2   | C3   | C4   | 174.1(2)  |
| P1   | C2   | C7   | C6   | -173.9(2) |
| P1   | C8   | C9   | C10  | -176.7(2) |
| P1   | C8   | C13  | C12  | 176.1(2)  |
| P1   | C14  | C15  | C16  | 178.2(3)  |
| P1   | C14  | C19  | C18  | -177.7(3) |
| C22  | C23  | C24  | C25  | -0.3(5)   |
| C23  | C22  | C27  | C26  | 0.2(6)    |
| C23  | C22  | P21  | C21  | 131.4(3)  |
| C23  | C22  | P21  | C28  | -108.5(3) |
| C23  | C22  | P21  | C34  | 11.2(3)   |
| C23  | C24  | C25  | C26  | 0.3(6)    |
| C24  | C25  | C26  | C27  | 0.0(7)    |
| C25  | C26  | C27  | C22  | -0.2(7)   |
| C27  | C22  | C23  | C24  | 0.1(5)    |
| C27  | C22  | P21  | C21  | -48.1(3)  |
| C27  | C22  | P21  | C28  | 71.9(3)   |
| C27  | C22  | P21  | C34  | -168.4(3) |
| C28  | C29  | C30  | C31  | -0.1(6)   |
| C29  | C28  | C33  | C32  | 0.9(6)    |
| C29  | C28  | P21  | C21  | 113.0(3)  |
| C29  | C28  | P21  | C22  | -8.5(3)   |
| C29  | C28  | P21  | C34  | -126.2(3) |
| C29  | C30  | C31  | C32  | -1.0(6)   |
| C30  | C31  | C32  | C33  | 2.1(6)    |
| C31  | C32  | C33  | C28  | -2.0(6)   |
| C33  | C28  | C29  | C30  | 0.2(5)    |
| C33  | C28  | P21  | C21  | -62.5(4)  |
| C33  | C28  | P21  | C22  | 176.0(3)  |
| C33  | C28  | P21  | C34  | 58.3(3)   |
| C34  | C35  | C36  | C37  | 0.3(6)    |
| C35  | C34  | C39  | C38  | -0.3(6)   |
| C35  | C34  | P21  | C21  | -38.8(4)  |
| C35  | C34  | P21  | C22  | 81.8(3)   |
| C35  | C34  | P21  | C28  | -158.4(3) |
| C35  | C36  | C37  | C38  | -1.0(7)   |
| C36  | C37  | C38  | C39  | 1.0(6)    |
| C37  | C38  | C39  | C34  | -0.4(6)   |
| C39  | C34  | C35  | C36  | 0.3(6)    |
| C39  | C34  | P21  | C21  | 148.8(3)  |
| C39  | C34  | P21  | C22  | -90.6(3)  |
| C39  | C34  | P21  | C28  | 29.2(4)   |
| P21  | C22  | C23  | C24  | -179.5(3) |
| P21  | C22  | C27  | C26  | 179.7(3)  |
| P21  | C28  | C29  | C30  | -175.2(3) |
| P21  | C28  | C33  | C32  | 176.4(3)  |
| P21  | C34  | C35  | C36  | -172.1(3) |
| P21  | C34  | C39  | C38  | 172.0(3)  |

**Table S6:** Hydrogen Fractional Atomic Coordinates ( $\times 10^4$ ) and Equivalent Isotropic Displacement Parameters ( $\text{\AA}^2 \times 10^3$ ) for **2009src0115**.  $U_{eq}$  is defined as 1/3 of the trace of the orthogonalised  $U_{ij}$ .

| Atom | x        | y        | z        | $U_{eq}$ |
|------|----------|----------|----------|----------|
| H7A  | -1112.79 | 11488.25 | 2298.23  | 36       |
| H8   | 4210.07  | 10248.46 | 1594.89  | 40       |
| H9A  | -519.68  | 6680.75  | 2207.91  | 42       |
| H10A | -995.22  | 9584.16  | -229.1   | 48       |
| H17A | 11015.91 | 7783.89  | 2567.19  | 46       |
| H18A | 11038.96 | 5333.93  | 5175.51  | 37       |
| H19A | 10329.56 | 2504.16  | 2663.73  | 35       |
| H20  | 5927.23  | 5261.56  | 3587.34  | 58       |
| H1A  | 1607.21  | 10335.29 | 3178.91  | 47       |
| H1B  | 564.2    | 10276.11 | 3825.33  | 47       |
| H1C  | 1422.76  | 9211.34  | 3515.84  | 47       |
| H3   | 912.79   | 11807.62 | 4426.29  | 33       |
| H4   | 1127.52  | 13472.16 | 4650.41  | 39       |
| H5   | 3263.55  | 13865.04 | 4561.05  | 37       |
| H6   | 5189.11  | 12629.59 | 4207.04  | 34       |
| H7   | 4995     | 10951.94 | 3974.35  | 31       |
| H9   | 2618.47  | 10498.5  | 5409.75  | 27       |
| H10  | 2239.35  | 9647.88  | 6443.73  | 30       |
| H11  | 1861.75  | 7939.11  | 6533.67  | 30       |
| H12  | 1788.54  | 7094.92  | 5600.74  | 32       |
| H13  | 2124.09  | 7945.34  | 4560.62  | 31       |
| H15  | 3978.18  | 9751.42  | 2789.24  | 39       |
| H16  | 6035.52  | 8814.98  | 2290.61  | 45       |
| H17  | 7612.26  | 7721.59  | 2929.65  | 40       |
| H18  | 7125.68  | 7511.46  | 4047.86  | 39       |
| H19  | 5067.96  | 8419.55  | 4553.05  | 35       |
| H21A | 6268.64  | 8717.24  | 252.33   | 80       |
| H21B | 4634.7   | 9019.69  | 284.09   | 80       |
| H21C | 5544.1   | 8948.8   | -410.21  | 80       |
| H23  | 5380.05  | 5921.94  | -946.22  | 44       |
| H24  | 3722.1   | 5696.06  | -1567.88 | 55       |
| H25  | 1512.42  | 6731.37  | -1410.19 | 76       |
| H26  | 992.51   | 7989.81  | -637.82  | 80       |
| H27  | 2639.4   | 8238.01  | -16.22   | 65       |
| H29  | 3294.75  | 6468.29  | 798.22   | 42       |
| H30  | 2871.45  | 5959.01  | 1907.84  | 49       |
| H31  | 4438.54  | 5985.48  | 2629.34  | 53       |
| H32  | 6494.95  | 6460.3   | 2254.41  | 53       |
| H33  | 6909.33  | 7023.15  | 1151.83  | 49       |
| H35  | 7342.66  | 7745.04  | -995.34  | 49       |
| H36  | 9257.81  | 6748     | -1551.97 | 60       |
| H37  | 10078.4  | 4993.24  | -1215.88 | 55       |
| H38  | 9027.03  | 4217.89  | -292.32  | 51       |
| H39  | 7092.72  | 5205.8   | 276.42   | 46       |
| H21  | 12624.43 | 2909.15  | 2655.25  | 45       |
| H22  | 12360.03 | 4399.29  | 3095.89  | 36       |
| H23A | 15555.99 | 3850.15  | 2977.92  | 40       |
| H31A | 16409.22 | 2114.66  | 2474.72  | 40       |
| H32A | 14678.06 | 1739.48  | 2124.35  | 45       |
| H33A | 18058.15 | 188.11   | 1681.92  | 51       |
| H42A | 5708.8   | 3932.47  | 5535.41  | 64       |
| H42B | 5778.84  | 4594.33  | 4976.19  | 64       |
| H41A | 4541.8   | 6008.2   | 5266.78  | 64       |
| H41B | 4969.58  | 4931.09  | 5232.7   | 64       |
| H43A | 4175.24  | 5569.79  | 3979.9   | 64       |
| H43B | 4223.46  | 6620.77  | 3926.08  | 64       |
| H44A | 4825.93  | 6021.65  | 4218.28  | 64       |
| H44B | 3863.36  | 5914.3   | 3828.7   | 64       |

**Table S7:** Hydrogen Bond information for **2009src0115**.

| D   | H    | A                | d(D-H)/Å | d(H-A)/Å | d(D-A)/Å | D-H-A/deg |
|-----|------|------------------|----------|----------|----------|-----------|
| O7  | H7A  | O31 <sup>1</sup> | 0.84     | 1.88     | 2.714(3) | 174.2     |
| O8  | H8   | O32 <sup>2</sup> | 0.84     | 1.93     | 2.748(3) | 164.7     |
| O9  | H9A  | O11 <sup>3</sup> | 0.84     | 1.99     | 2.828(3) | 172.3     |
| O10 | H10A | O6 <sup>4</sup>  | 0.84     | 1.97     | 2.803(3) | 174.1     |
| O17 | H17A | O4 <sup>5</sup>  | 0.84     | 1.95     | 2.779(3) | 171.8     |
| O18 | H18A | O13 <sup>6</sup> | 0.84     | 1.93     | 2.764(3) | 174.0     |
| O19 | H19A | O7 <sup>7</sup>  | 0.84     | 1.85     | 2.673(3) | 166.7     |
| O20 | H20  | O42 <sup>8</sup> | 0.84     | 2.39     | 3.057(9) | 136.7     |
| O20 | H20  | O43              | 0.84     | 1.88     | 2.676(5) | 158.2     |
| O20 | H20  | O44              | 0.84     | 1.83     | 2.622(5) | 157.5     |
| O21 | H21  | O19              | 0.84     | 1.85     | 2.676(3) | 166.5     |
| O22 | H22  | O14              | 0.84     | 1.86     | 2.695(3) | 171.4     |
| O23 | H23A | O20 <sup>5</sup> | 0.84     | 1.88     | 2.710(3) | 168.7     |
| O31 | H31A | O23              | 0.84     | 1.87     | 2.699(3) | 170.2     |
| O32 | H32A | O21              | 0.84     | 1.84     | 2.671(3) | 169.4     |
| O33 | H33A | O1 <sup>9</sup>  | 0.84     | 1.86     | 2.696(3) | 173.2     |

-----  
<sup>1</sup>-2+x,1+y,+z; <sup>2</sup>-1+x,1+y,+z; <sup>3</sup>-1+x,+y,+z; <sup>4</sup>-x,2-y,-z; <sup>5</sup>1+x,+y,+z; <sup>6</sup>2-x,1-y,1-z; <sup>7</sup>1+x,-1+y,+z; <sup>8</sup>1-x,1-y,1-z; <sup>9</sup>2+x,-1+y,+z

**Table S8:** Atomic Occupancies for all atoms that are not fully occupied in **2009src0115**.

| Atom | Occupancy |
|------|-----------|
| O42  | 0.217(3)  |
| H42A | 0.217(3)  |
| H42B | 0.217(3)  |
| O41  | 0.158(3)  |
| H41A | 0.158(3)  |
| H41B | 0.158(3)  |
| O43  | 0.281(3)  |
| H43A | 0.281(3)  |
| H43B | 0.281(3)  |
| O44  | 0.344(3)  |
| H44A | 0.344(3)  |
| H44B | 0.344(3)  |

## Citations for 1

COLLECT (Hooft, R.W.W., 1998)

DENZO (Otwinowski & Minor, 1997)

O.V. Dolomanov and L.J. Bourhis and R.J. Gildea and J.A.K. Howard and H. Puschmann, Olex2: A complete structure solution, refinement and analysis program, *J. Appl. Cryst.*, (2009), **42**, 339-341.

Sheldrick, G.M., A short history of ShelX, *Acta Cryst.*, (2008), **A64**, 339-341.

Sheldrick, G.M., Crystal structure refinement with ShelXL, *Acta Cryst.*, (2015), **C71**, 3-8.



## [MePPh<sub>3</sub>][B<sub>5</sub>O<sub>6</sub>(OH)<sub>4</sub>]·B(OH)<sub>3</sub>·0.5H<sub>2</sub>O Compound 2

Submitted by: **Mike A Beckett**  
Bangor University

Solved by: **Peter N Horton**

Sample ID: **MAB/JT/33**

***R*<sub>1</sub> = 5.63%**

### Crystal Data and Experimental

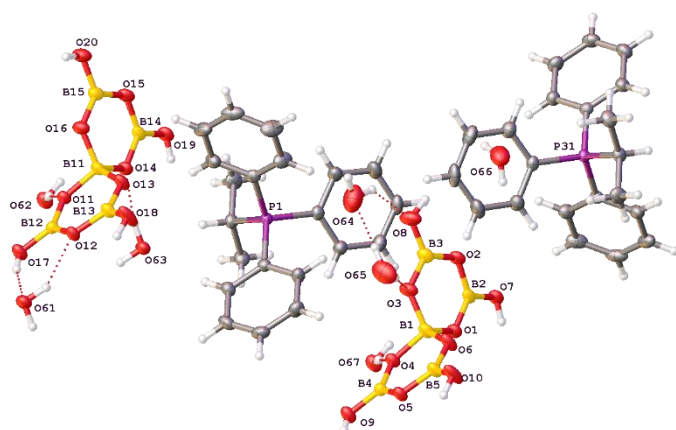

12947 unique (*R*<sub>int</sub> = 0.0578) which were used in all calculations. The final *wR*<sub>2</sub> was 0.1571 (all data) and *R*<sub>1</sub> was 0.0563 (*I* ≥ 2 *σ*(*I*)).

**Experimental.** Single colourless block-shaped crystals of **2010src0454b (2)** were used as supplied. A suitable crystal with dimensions 0.260 × 0.180 × 0.120 mm<sup>3</sup> was selected and mounted on a Damien diffractometer. The crystal was kept at a steady *T* = 120(2) K during data collection. The structure was solved with the ShelXS-97 (Sheldrick, 2008) solution program using direct methods and by using Olex2 1.5-alpha (Dolomanov et al., 2009) as the graphical interface. The model was refined with ShelXL 2018/3 (Sheldrick, 2015) using full matrix least squares minimisation on *F*<sup>2</sup>.

**Crystal Data.** C<sub>21</sub>H<sub>33</sub>B<sub>5</sub>O<sub>13.5</sub>P, *M<sub>r</sub>* = 586.49, triclinic, *P*-1 (No. 2), *a* = 9.1810(3) Å, *b* = 13.4812(5) Å, *c* = 23.8357(8) Å, *α* = 75.3130(10)°, *β* = 83.095(2)°, *γ* = 86.919(2)°, *V* = 2832.24(17) Å<sup>3</sup>, *T* = 120(2) K, *Z* = 4, *Z'* = 2, *μ*(MoK<sub>α</sub>) = 0.162 mm<sup>-1</sup>, 50870 reflections measured,

**Compound 2**      **2010src0454b**

|                              |                                                                    |
|------------------------------|--------------------------------------------------------------------|
| Formula                      | C <sub>21</sub> H <sub>33</sub> B <sub>5</sub> O <sub>13.5</sub> P |
| $D_{calc.}/\text{g cm}^{-3}$ | 1.375                                                              |
| $\mu/\text{mm}^{-1}$         | 0.162                                                              |
| Formula Weight               | 586.49                                                             |
| Colour                       | colourless                                                         |
| Shape                        | block-shaped                                                       |
| Size/mm <sup>3</sup>         | 0.260×0.180×0.120                                                  |
| $T/\text{K}$                 | 120(2)                                                             |
| Crystal System               | triclinic                                                          |
| Space Group                  | <i>P</i> -1                                                        |
| $a/\text{\AA}$               | 9.1810(3)                                                          |
| $b/\text{\AA}$               | 13.4812(5)                                                         |
| $c/\text{\AA}$               | 23.8357(8)                                                         |
| $\alpha/^\circ$              | 75.3130(10)                                                        |
| $\beta/^\circ$               | 83.095(2)                                                          |
| $\gamma/^\circ$              | 86.919(2)                                                          |
| $V/\text{\AA}^3$             | 2832.24(17)                                                        |
| $Z$                          | 4                                                                  |
| $Z'$                         | 2                                                                  |
| Wavelength/ $\text{\AA}$     | 0.71073                                                            |
| Radiation type               | MoK $\alpha$                                                       |
| $\Theta_{min}/^\circ$        | 2.941                                                              |
| $\Theta_{max}/^\circ$        | 27.605                                                             |
| Measured Refl's.             | 50870                                                              |
| Indep't Refl's               | 12947                                                              |
| Refl's $I \geq 2 \sigma(I)$  | 9308                                                               |
| $R_{int}$                    | 0.0578                                                             |
| Parameters                   | 763                                                                |
| Restraints                   | 1                                                                  |
| Largest Peak                 | 0.940                                                              |
| Deepest Hole                 | -0.540                                                             |
| GooF                         | 1.038                                                              |
| $wR_2$ (all data)            | 0.1571                                                             |
| $wR_2$                       | 0.1416                                                             |
| $R_1$ (all data)             | 0.0831                                                             |
| $R_1$                        | 0.0563                                                             |

**Structure Quality Indicators**

|                     |                                            |       |               |      |                     |       |                            |       |
|---------------------|--------------------------------------------|-------|---------------|------|---------------------|-------|----------------------------|-------|
| <b>Reflections:</b> | d min (MoK $\alpha$ )<br>2 $\Theta$ =55.2° | 0.77  | $I/\sigma(I)$ | 18.4 | $R_{int}$<br>m=3.92 | 5.78% | Full 50.5°<br>99% to 55.2° | 99.7  |
| <b>Refinement:</b>  | Shift                                      | 0.001 | Max Peak      | 0.9  | Min Peak            | -0.5  | GooF                       | 1.038 |

A colourless block-shaped-shaped crystal with dimensions 0.260 × 0.180 × 0.120 mm<sup>3</sup> was mounted. Data were collected using a Damien diffractometer equipped with an Oxford Cryosystems low-temperature device operating at  $T = 120(2)$  K.

Data were measured using  $\phi$  &  $\omega$  scans with MoK $\alpha$  radiation. The diffraction pattern was indexed and the total number of runs and images was based on the strategy calculation from the program COLLECT (Hooft, R.W.W., 1998). The maximum resolution that was achieved was  $\Theta = 27.605^\circ$  (0.77 Å).

The unit cell was refined using DENZO (Otwinowski & Minor, 1997) & COLLECT (Hooft, R.W.W., 1998) on 12555 reflections, 25% of the observed reflections.

Data reduction, scaling and absorption corrections were performed using DENZO (Otwinowski & Minor, 1997) & COLLECT (Hooft, R.W.W., 1998). The final completeness is 99.70 % out to 27.605° in  $\Theta$  SADABS



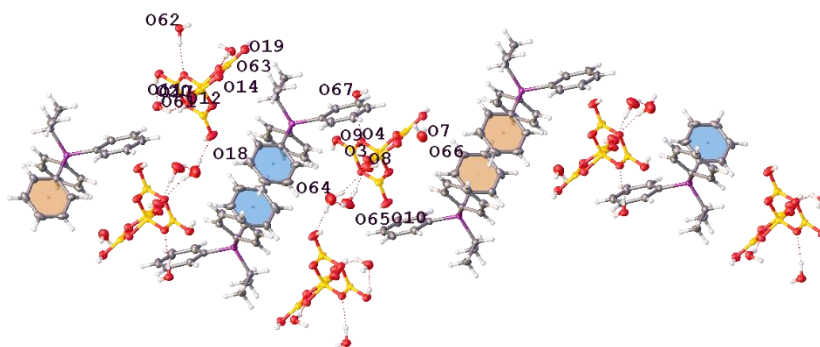

**Figure S6** The  $\pi$ - $\pi$  interactions of 2010src0454b. **Plane 1 to #1@2\_575 (-X,2-Y,-Z):** The angle between these two planes is 0.000 °, the Centroid-Centroid distance is 3.748 Å and the Shift Distance is 0.917 Å **Plane 5 to #5@2\_666 (1-X,1-Y,1-Z):** The angle between these two planes is 0.000 °, the Centroid-Centroid distance is 3.712 Å and the Shift Distance is 1.155 Å

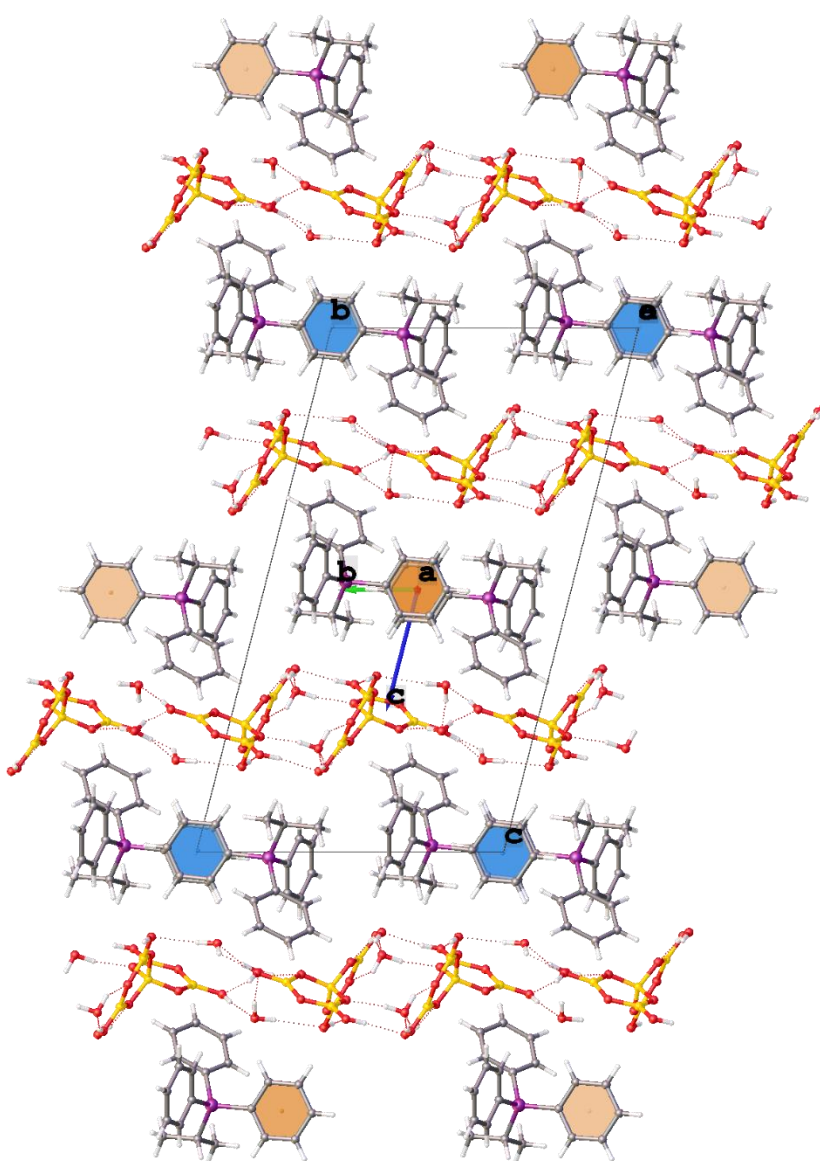

**Figure S7** Packing diagram of 2010src0454b viewed along the a axis

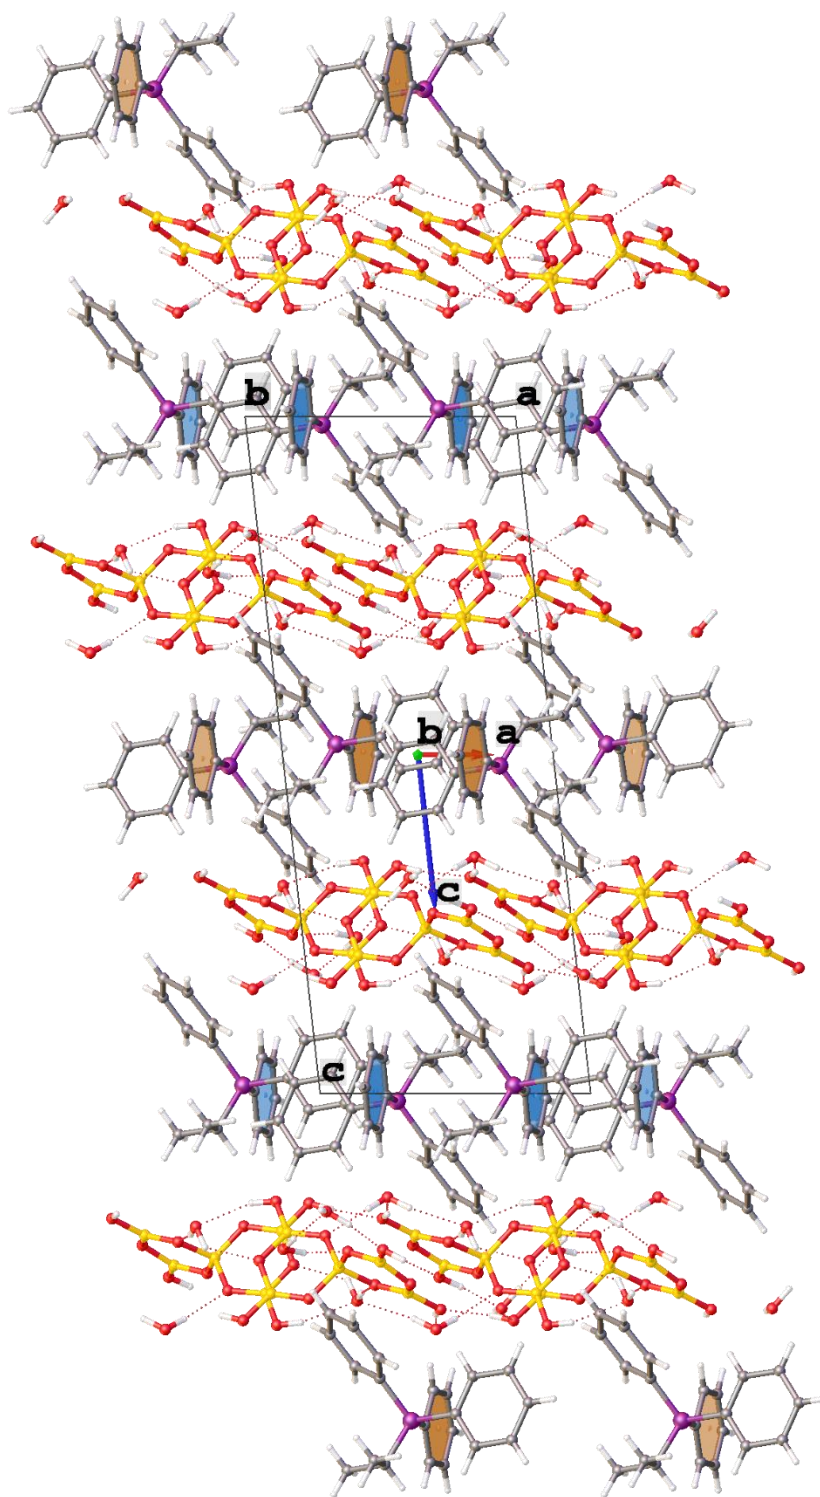

**Figure S8** Packing diagram of 2010src0454b viewed along the b axis



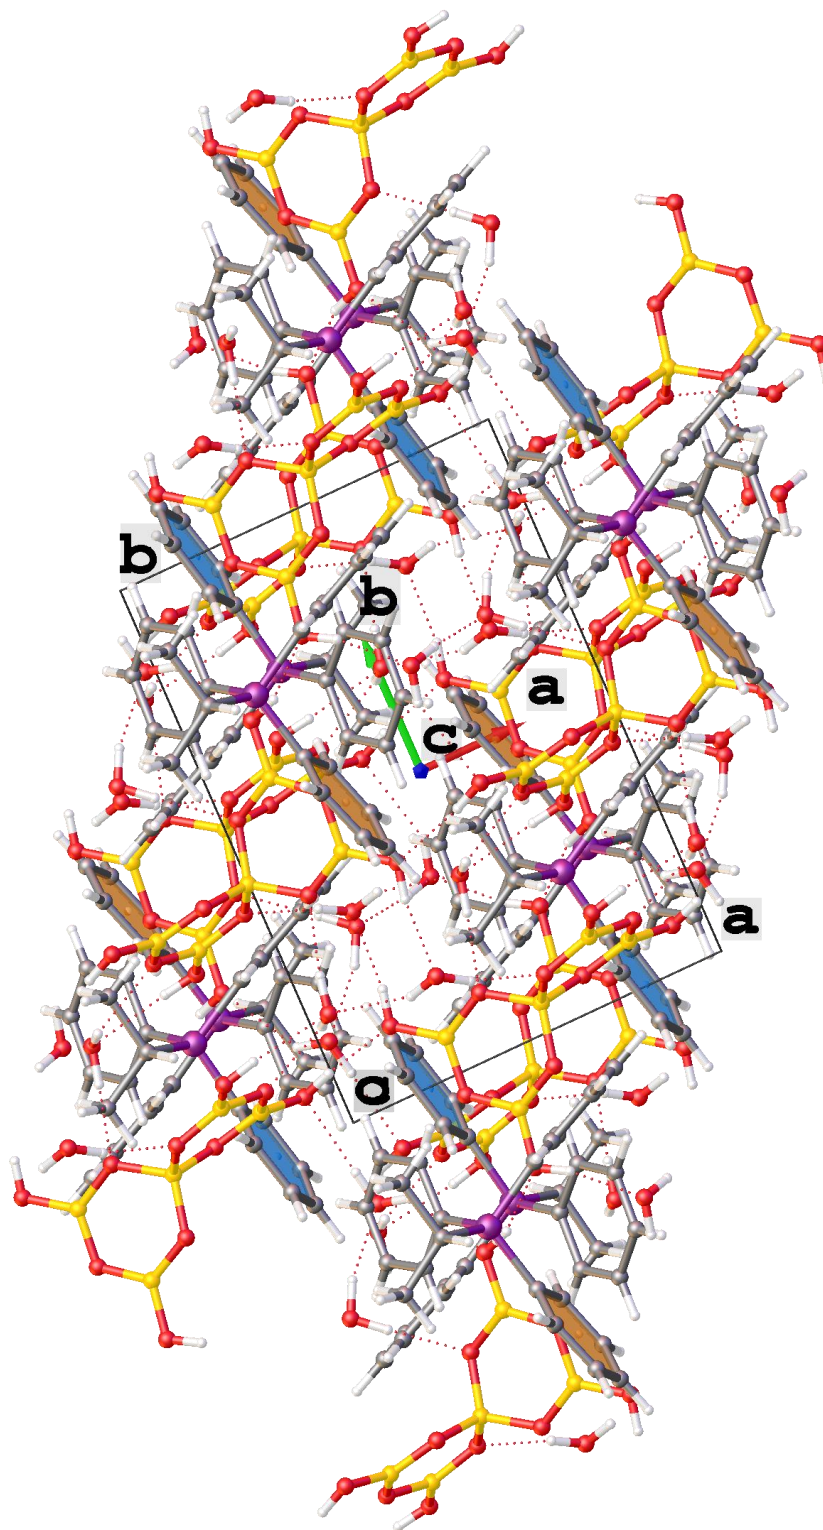

**Figure S9** Packing diagram of 2010src0454b viewed along the c axis

**Table S9:** Fractional Atomic Coordinates ( $\times 10^4$ ) and Equivalent Isotropic Displacement Parameters ( $\text{\AA}^2 \times 10^3$ ) for 2010src0454b.  $U_{eq}$  is defined as 1/3 of the trace of the orthogonalised  $U_{ij}$ .

| Atom | x        | y          | z          | $U_{eq}$ |
|------|----------|------------|------------|----------|
| B1   | -21(2)   | 4492(2)    | 2582.9(11) | 23.8(5)  |
| B2   | 2426(2)  | 4321(2)    | 2949.3(10) | 21.7(5)  |
| B3   | 1534(3)  | 5989(2)    | 2490.3(12) | 25.9(5)  |
| B4   | -1784(2) | 3819.3(18) | 2059.7(10) | 19.6(5)  |

| Atom | x           | y           | z           | $U_{eq}$  |
|------|-------------|-------------|-------------|-----------|
| B5   | -2637(2)    | 4251(2)     | 2961.8(11)  | 23.9(5)   |
| O1   | 1240.3(15)  | 3881.2(12)  | 2833.4(7)   | 23.9(3)   |
| O2   | 2557.8(15)  | 5367.7(12)  | 2820.4(7)   | 25.8(3)   |
| O3   | 373.4(15)   | 5565.8(12)  | 2342.6(7)   | 27.8(4)   |
| O4   | -398.4(14)  | 4054.7(11)  | 2109.3(6)   | 22.3(3)   |
| O5   | -2940.2(14) | 3939.2(11)  | 2474.6(6)   | 21.7(3)   |
| O6   | -1259.7(15) | 4434.7(13)  | 3039.1(7)   | 29.4(4)   |
| O7   | 3565.5(15)  | 3738.7(12)  | 3196.1(7)   | 25.0(3)   |
| O8   | 1675.3(17)  | 7017.6(12)  | 2314.1(8)   | 36.5(4)   |
| O9   | -2078.8(15) | 3462.9(13)  | 1599.6(7)   | 27.1(4)   |
| O10  | -3780.5(16) | 4385.0(15)  | 3359.7(7)   | 37.8(4)   |
| B11  | 4574(2)     | 9493.9(19)  | -2432.6(11) | 21.8(5)   |
| B12  | 2838(2)     | 8806.6(18)  | -2960.6(10) | 18.8(5)   |
| B13  | 1984(2)     | 9160(2)     | -2037.7(11) | 23.9(5)   |
| B14  | 7063(2)     | 9341(2)     | -2098.9(10) | 21.8(5)   |
| B15  | 6112(3)     | 10990(2)    | -2543.3(11) | 24.2(5)   |
| O11  | 4214.9(14)  | 9069.7(11)  | -2916.5(6)  | 20.8(3)   |
| O12  | 1687.9(14)  | 8877.8(11)  | -2535.6(6)  | 21.9(3)   |
| O13  | 3361.2(15)  | 9369.1(12)  | -1965.5(6)  | 26.0(3)   |
| O14  | 5865.8(15)  | 8889.4(11)  | -2199.0(7)  | 23.6(3)   |
| O15  | 7195.4(15)  | 10386.4(12) | -2245.8(7)  | 27.9(4)   |
| O16  | 4913.3(15)  | 10573.5(11) | -2657.7(7)  | 26.5(3)   |
| O17  | 2550.5(15)  | 8466.4(13)  | -3427.9(7)  | 26.4(3)   |
| O18  | 857.6(16)   | 9241.4(16)  | -1625.9(8)  | 39.5(5)   |
| O19  | 8208.0(15)  | 8757.3(12)  | -1853.4(7)  | 27.1(4)   |
| O20  | 6348.2(17)  | 12022.4(12) | -2719.1(8)  | 33.1(4)   |
| C1   | 2430(2)     | 8949.3(16)  | 33.4(9)     | 20.5(4)   |
| C2   | 2460(2)     | 9610.3(17)  | -522.9(10)  | 27.9(5)   |
| C3   | 2076(3)     | 10637.2(18) | -576.4(12)  | 35.5(6)   |
| C4   | 1686(2)     | 10997.6(19) | -84.0(13)   | 35.5(6)   |
| C5   | 1643(3)     | 10344(2)    | 460.8(13)   | 39.6(6)   |
| C6   | 2004(3)     | 9312.9(18)  | 526.7(11)   | 32.3(5)   |
| C7   | 1105(2)     | 6946.0(15)  | 226.1(9)    | 19.8(4)   |
| C8   | 481(2)      | 6762.0(17)  | -245.9(10)  | 23.7(5)   |
| C9   | -896(2)     | 6327.8(18)  | -149.7(11)  | 29.2(5)   |
| C10  | -1636(2)    | 6079.3(17)  | 407.6(11)   | 29.6(5)   |
| C11  | -1019(2)    | 6258.8(18)  | 875.1(11)   | 29.9(5)   |
| C12  | 352(2)      | 6695.1(17)  | 786.8(10)   | 25.3(5)   |
| C13  | 3772(2)     | 7099.3(16)  | 745.2(9)    | 20.9(4)   |
| C14  | 4656(2)     | 7726.6(18)  | 939.9(10)   | 27.6(5)   |
| C15  | 5416(2)     | 7315(2)     | 1418.6(11)  | 33.3(6)   |
| C16  | 5322(2)     | 6280(2)     | 1697.5(10)  | 31.6(5)   |
| C17  | 4480(2)     | 5651.7(19)  | 1496.0(10)  | 29.1(5)   |
| C18  | 3692(2)     | 6052.4(17)  | 1025.8(9)   | 24.2(5)   |
| C19  | 3962(2)     | 7398.8(16)  | -525.7(9)   | 22.0(4)   |
| C20  | 4270(2)     | 6249.4(17)  | -466.8(10)  | 27.7(5)   |
| C21  | 5404(2)     | 7973.6(19)  | -610.5(11)  | 31.1(5)   |
| P1   | 2813.8(5)   | 7602.6(4)   | 115.7(2)    | 17.53(13) |
| C31  | 1041(2)     | 7861.8(17)  | 4213.1(9)   | 21.6(4)   |
| C32  | 1085(2)     | 8895.6(18)  | 3916.6(10)  | 27.3(5)   |
| C33  | 281(3)      | 9259(2)     | 3445.4(11)  | 35.0(6)   |
| C34  | -556(3)     | 8592(2)     | 3267.2(10)  | 37.3(6)   |
| C35  | -616(3)     | 7570(2)     | 3562.5(11)  | 34.4(6)   |
| C36  | 170(2)      | 7202.9(19)  | 4037.7(10)  | 28.4(5)   |
| C37  | 2498(2)     | 6061.1(16)  | 4905.0(9)   | 20.4(4)   |
| C38  | 2544(2)     | 5384.6(17)  | 5453.6(10)  | 26.7(5)   |
| C39  | 3044(3)     | 4385.5(18)  | 5492.2(12)  | 33.5(6)   |
| C40  | 3482(2)     | 4057.1(18)  | 4992.2(12)  | 33.9(6)   |
| C41  | 3438(2)     | 4723.8(19)  | 4448.6(12)  | 34.0(6)   |
| C42  | 2962(2)     | 5731.0(17)  | 4399.0(10)  | 26.8(5)   |
| C43  | 3701(2)     | 8076.6(15)  | 4739.0(9)   | 19.6(4)   |
| C44  | 4297(2)     | 8271.8(16)  | 5215.3(10)  | 23.3(5)   |

| Atom | x          | y          | z          | $U_{eq}$  |
|------|------------|------------|------------|-----------|
| C45  | 5664(2)    | 8715.3(17) | 5126.3(10) | 27.8(5)   |
| C46  | 6432(2)    | 8962.6(18) | 4574.6(11) | 30.2(5)   |
| C47  | 5846(2)    | 8768.2(18) | 4103.4(10) | 28.4(5)   |
| C48  | 4482(2)    | 8321.9(16) | 4184.5(9)  | 23.5(5)   |
| C49  | 865(2)     | 7563.2(16) | 5486.8(9)  | 21.8(4)   |
| C50  | -542(2)    | 6950.1(19) | 5577.5(10) | 31.0(5)   |
| C51  | 494(2)     | 8705.9(18) | 5428.7(10) | 28.5(5)   |
| P31  | 2023.8(5)  | 7391.3(4)  | 4840.3(2)  | 17.59(13) |
| O61  | -517.3(16) | 8117.1(12) | -3070.2(7) | 27.2(3)   |
| O62  | 6688.2(16) | 8316.1(13) | -3490.9(7) | 28.3(4)   |
| O63  | 5140.9(16) | 6902.2(12) | -1970.7(7) | 24.4(3)   |
| O64  | -252(3)    | 8557.0(18) | 1750.5(10) | 62.1(6)   |
| O65  | -2000(2)   | 6962.5(17) | 2305.4(11) | 56.4(6)   |
| O66  | 5825(2)    | 6715.0(15) | 3181.5(9)  | 47.5(5)   |
| O67  | 2061.9(16) | 3299.2(13) | 1537.7(7)  | 27.9(4)   |

**Table S10:** Anisotropic Displacement Parameters ( $\times 10^4$ ) for **2010src0454b**. The anisotropic displacement factor exponent takes the form:  $-2\pi^2[h^2a^{*2} \times U_{11} + \dots + 2hka^* \times b^* \times U_{12}]$

| Atom | $U_{11}$ | $U_{22}$ | $U_{33}$ | $U_{23}$  | $U_{13}$  | $U_{12}$ |
|------|----------|----------|----------|-----------|-----------|----------|
| B1   | 11.9(10) | 33.9(14) | 28.1(14) | -12.1(11) | -1.6(9)   | -2.7(9)  |
| B2   | 14.1(10) | 34.3(14) | 17.7(12) | -9.1(10)  | 2.2(9)    | -5.6(9)  |
| B3   | 15.3(11) | 32.8(15) | 32.6(15) | -13.4(12) | -2.8(10)  | 0.1(10)  |
| B4   | 15.3(10) | 23.6(12) | 19.9(12) | -4.7(10)  | -2.7(9)   | -0.9(9)  |
| B5   | 13.6(10) | 36.4(15) | 25.1(13) | -13.1(11) | -2.0(9)   | -4.8(9)  |
| O1   | 13.6(7)  | 30.3(9)  | 28.8(9)  | -7.5(7)   | -4.2(6)   | -4.6(6)  |
| O2   | 15.0(7)  | 32.0(9)  | 32.8(9)  | -10.4(7)  | -4.2(6)   | -5.2(6)  |
| O3   | 15.7(7)  | 28.4(9)  | 42.4(10) | -12.6(7)  | -7.7(7)   | -0.7(6)  |
| O4   | 12.9(6)  | 31.4(9)  | 24.9(8)  | -11.2(7)  | -1.5(6)   | -2.2(6)  |
| O5   | 12.3(6)  | 33.0(9)  | 22.8(8)  | -11.6(7)  | -2.3(6)   | -2.9(6)  |
| O6   | 13.4(7)  | 53.1(11) | 28.0(9)  | -21.2(8)  | -1.1(6)   | -5.7(7)  |
| O7   | 14.6(7)  | 33.1(9)  | 28.1(9)  | -7.7(7)   | -4.0(6)   | -5.2(6)  |
| O8   | 22.7(8)  | 29.4(9)  | 60.8(12) | -13.8(8)  | -11.9(8)  | -2.1(7)  |
| O9   | 16.7(7)  | 42.0(10) | 26.5(9)  | -14.9(7)  | -3.5(6)   | -2.4(7)  |
| O10  | 15.0(7)  | 71.9(13) | 36.6(10) | -32.2(9)  | 2.0(7)    | -11.6(8) |
| B11  | 14.0(10) | 28.7(13) | 25.2(13) | -10.3(10) | -2.6(9)   | -3.0(9)  |
| B12  | 16.1(10) | 20.9(12) | 18.9(12) | -4.1(9)   | -1.2(8)   | -1.5(9)  |
| B13  | 14.9(10) | 33.8(14) | 25.8(13) | -11.9(11) | -3.6(9)   | -1.2(9)  |
| B14  | 14.1(10) | 33.1(14) | 19.8(12) | -9.6(10)  | 0.6(9)    | -4.8(9)  |
| B15  | 19.3(11) | 27.6(14) | 27.7(14) | -11.5(11) | 1.0(9)    | -4.2(9)  |
| O11  | 12.7(6)  | 27.1(8)  | 23.6(8)  | -7.7(6)   | -2.0(5)   | -3.7(6)  |
| O12  | 12.9(6)  | 33.4(9)  | 21.9(8)  | -10.4(7)  | -2.9(6)   | -3.8(6)  |
| O13  | 14.3(7)  | 42.7(10) | 25.2(8)  | -15.1(7)  | -2.3(6)   | -5.5(6)  |
| O14  | 14.4(7)  | 27.1(8)  | 30.1(9)  | -6.4(7)   | -6.1(6)   | -3.3(6)  |
| O15  | 17.6(7)  | 31.7(9)  | 36.7(10) | -10.6(7)  | -4.7(6)   | -7.9(6)  |
| O16  | 19.8(7)  | 24.9(8)  | 36.9(9)  | -9.0(7)   | -7.4(6)   | -2.5(6)  |
| O17  | 15.9(7)  | 41.3(10) | 26.1(8)  | -14.9(7)  | -2.7(6)   | -3.6(6)  |
| O18  | 15.5(7)  | 78.2(14) | 35.1(10) | -33.1(9)  | 2.1(7)    | -12.3(8) |
| O19  | 14.4(7)  | 36.3(9)  | 32.5(9)  | -9.6(7)   | -5.9(6)   | -4.7(6)  |
| O20  | 27.3(8)  | 28.4(9)  | 46.6(11) | -12.8(8)  | -6.8(8)   | -5.1(7)  |
| C1   | 12.3(9)  | 22.6(11) | 26.7(12) | -6.2(9)   | -2.8(8)   | 0.4(8)   |
| C2   | 28.1(11) | 24.8(12) | 32.7(13) | -6.9(10)  | -12.5(10) | 0.5(9)   |
| C3   | 33.9(13) | 22.3(12) | 49.4(16) | 0.4(11)   | -20.6(12) | -2.0(10) |
| C4   | 17.7(10) | 23.3(12) | 67.1(19) | -13.7(12) | -6.3(11)  | 2.0(9)   |
| C5   | 34.8(13) | 31.8(14) | 52.9(18) | -19.9(13) | 12.5(12)  | 0.0(11)  |
| C6   | 32.9(12) | 29.0(13) | 33.5(14) | -11.7(11) | 10.9(10)  | -0.4(10) |
| C7   | 17.7(9)  | 19.2(11) | 22.9(11) | -5.4(8)   | -3.6(8)   | 0.4(8)   |
| C8   | 21.8(10) | 27.0(12) | 24.0(12) | -9.5(9)   | -3.8(8)   | 1.1(8)   |
| C9   | 25.7(11) | 30.7(13) | 37.1(14) | -15.5(11) | -12.1(10) | 0.0(9)   |
| C10  | 21.2(11) | 23.6(12) | 43.2(15) | -5.5(10)  | -5.5(10)  | -4.7(9)  |



| Atom | $U_{11}$ | $U_{22}$ | $U_{33}$ | $U_{23}$  | $U_{13}$  | $U_{12}$  |
|------|----------|----------|----------|-----------|-----------|-----------|
| C11  | 22.1(11) | 34.2(13) | 29.2(13) | -0.4(10)  | 0.3(9)    | -5.6(9)   |
| C12  | 21.4(10) | 32.2(13) | 21.1(11) | -3.8(9)   | -2.6(8)   | -3.8(9)   |
| C13  | 17.0(9)  | 26.2(12) | 19.0(11) | -5.8(9)   | -0.8(8)   | 0.8(8)    |
| C14  | 23.2(11) | 31.7(13) | 26.9(12) | -3.8(10)  | -4.4(9)   | -6.3(9)   |
| C15  | 23.9(11) | 49.0(16) | 27.7(13) | -7.1(11)  | -7.5(9)   | -8.4(10)  |
| C16  | 22.6(11) | 46.5(15) | 22.6(12) | -1.8(11)  | -6.4(9)   | 3.6(10)   |
| C17  | 26.5(11) | 31.2(13) | 26.6(12) | -2.3(10)  | -3.8(9)   | 4.1(9)    |
| C18  | 23.4(10) | 23.9(12) | 24.4(12) | -4.0(9)   | -3.1(9)   | -0.6(8)   |
| C19  | 20.1(10) | 25.4(11) | 20.3(11) | -6.0(9)   | -1.6(8)   | 1.1(8)    |
| C20  | 30.2(11) | 26.2(12) | 28.6(13) | -11.0(10) | -3.8(9)   | 5.7(9)    |
| C21  | 21.3(11) | 40.3(14) | 30.5(13) | -10.7(11) | 7.6(9)    | -4.6(10)  |
| P1   | 15.3(2)  | 19.1(3)  | 18.0(3)  | -4.5(2)   | -1.13(19) | -0.17(19) |
| C31  | 16.8(9)  | 27.5(12) | 19.3(11) | -4.3(9)   | -1.0(8)   | 1.7(8)    |
| C32  | 23.4(11) | 29.5(13) | 26.8(12) | -3.8(10)  | -2.1(9)   | 2.9(9)    |
| C33  | 28.7(12) | 38.4(15) | 28.8(13) | 5.1(11)   | -1.6(10)  | 10.0(10)  |
| C34  | 24.6(11) | 62.2(18) | 20.7(12) | -2.2(12)  | -6.9(9)   | 9.6(11)   |
| C35  | 25.4(11) | 53.0(17) | 26.5(13) | -10.1(12) | -8.1(10)  | -4.1(11)  |
| C36  | 22.5(11) | 35.2(13) | 26.5(12) | -4.3(10)  | -4.7(9)   | -3.4(9)   |
| C37  | 15.4(9)  | 22.1(11) | 24.5(11) | -6.0(9)   | -4.0(8)   | -0.7(8)   |
| C38  | 27.6(11) | 24.3(12) | 30.6(13) | -7.4(10)  | -11.0(9)  | -1.0(9)   |
| C39  | 30.5(12) | 23.7(12) | 46.1(15) | -0.7(11)  | -19.5(11) | -2.3(9)   |
| C40  | 19.8(11) | 22.7(12) | 63.3(18) | -16.2(12) | -9.6(11)  | 0.9(9)    |
| C41  | 21.7(11) | 34.3(14) | 49.9(16) | -22.1(12) | 6.0(10)   | -1.4(10)  |
| C42  | 24.1(11) | 28.0(12) | 29.1(13) | -10.7(10) | 2.7(9)    | -2.0(9)   |
| C43  | 16.5(9)  | 17.3(10) | 24.4(11) | -4.4(8)   | -2.5(8)   | 0.9(8)    |
| C44  | 22.0(10) | 25.4(12) | 24.2(12) | -8.8(9)   | -3.4(8)   | -0.4(8)   |
| C45  | 24.2(11) | 30.7(13) | 32.1(13) | -12.1(10) | -8.1(9)   | -0.1(9)   |
| C46  | 20.3(10) | 27.5(13) | 42.8(15) | -6.7(11)  | -6.1(10)  | -4.3(9)   |
| C47  | 20.4(10) | 30.9(13) | 29.6(13) | -1.2(10)  | 1.5(9)    | -3.5(9)   |
| C48  | 20.3(10) | 27.5(12) | 21.8(11) | -5.2(9)   | -1.4(8)   | -1.3(8)   |
| C49  | 17.9(9)  | 26.9(12) | 20.9(11) | -8.0(9)   | 0.4(8)    | 1.0(8)    |
| C50  | 22.6(11) | 40.7(14) | 29.0(13) | -10.1(11) | 5.4(9)    | -5.6(10)  |
| C51  | 24.4(11) | 33.4(13) | 30.2(13) | -14.1(10) | -2.5(9)   | 5.7(9)    |
| P31  | 15.1(2)  | 20.3(3)  | 17.4(3)  | -4.8(2)   | -1.97(19) | 0.30(19)  |
| O61  | 22.3(7)  | 31.6(9)  | 29.9(9)  | -9.3(7)   | -5.7(6)   | -6.8(7)   |
| O62  | 18.6(7)  | 38.0(10) | 30.8(9)  | -13.3(7)  | -3.9(6)   | 1.9(7)    |
| O63  | 21.0(7)  | 25.9(8)  | 27.5(9)  | -6.0(7)   | -7.3(6)   | -3.8(6)   |
| O64  | 60.8(14) | 69.3(16) | 48.3(14) | -3.3(12)  | -7.9(11)  | 17.1(12)  |
| O65  | 37.5(11) | 60.0(14) | 80.6(17) | -28.9(13) | -24.4(11) | 16.1(9)   |
| O66  | 57.2(13) | 39.2(11) | 49.1(13) | -14.2(9)  | -15.5(10) | 8.3(9)    |
| O67  | 17.1(7)  | 39.4(10) | 30.5(9)  | -14.9(7)  | -4.2(6)   | 3.1(7)    |

**Table S11:** Bond Lengths in Å for **2010src0454b**.

| Atom | Atom | Length/Å | Atom | Atom | Length/Å |
|------|------|----------|------|------|----------|
| B1   | O1   | 1.480(3) | B5   | O10  | 1.364(3) |
| B1   | O3   | 1.463(3) | B11  | O11  | 1.487(3) |
| B1   | O4   | 1.482(3) | B11  | O13  | 1.461(3) |
| B1   | O6   | 1.467(3) | B11  | O14  | 1.485(3) |
| B2   | O1   | 1.356(3) | B11  | O16  | 1.455(3) |
| B2   | O2   | 1.374(3) | B12  | O11  | 1.354(2) |
| B2   | O7   | 1.372(3) | B12  | O12  | 1.390(3) |
| B3   | O2   | 1.401(3) | B12  | O17  | 1.365(3) |
| B3   | O3   | 1.357(3) | B13  | O12  | 1.395(3) |
| B3   | O8   | 1.352(3) | B13  | O13  | 1.350(3) |
| B4   | O4   | 1.354(3) | B13  | O18  | 1.358(3) |
| B4   | O5   | 1.393(3) | B14  | O14  | 1.358(3) |
| B4   | O9   | 1.364(3) | B14  | O15  | 1.372(3) |
| B5   | O5   | 1.393(3) | B14  | O19  | 1.376(3) |
| B5   | O6   | 1.344(3) | B15  | O15  | 1.395(3) |

| Atom | Atom | Length/Å | Atom | Atom | Length/Å |
|------|------|----------|------|------|----------|
| B15  | O16  | 1.348(3) | C31  | C32  | 1.394(3) |
| B15  | O20  | 1.369(3) | C31  | C36  | 1.396(3) |
| C1   | C2   | 1.396(3) | C31  | P31  | 1.798(2) |
| C1   | C6   | 1.392(3) | C32  | C33  | 1.388(3) |
| C1   | P1   | 1.796(2) | C33  | C34  | 1.388(4) |
| C2   | C3   | 1.388(3) | C34  | C35  | 1.380(4) |
| C3   | C4   | 1.383(4) | C35  | C36  | 1.387(3) |
| C4   | C5   | 1.369(4) | C37  | C38  | 1.396(3) |
| C5   | C6   | 1.386(3) | C37  | C42  | 1.401(3) |
| C7   | C8   | 1.402(3) | C37  | P31  | 1.795(2) |
| C7   | C12  | 1.397(3) | C38  | C39  | 1.384(3) |
| C7   | P1   | 1.802(2) | C39  | C40  | 1.383(4) |
| C8   | C9   | 1.391(3) | C40  | C41  | 1.381(4) |
| C9   | C10  | 1.386(3) | C41  | C42  | 1.384(3) |
| C10  | C11  | 1.387(3) | C43  | C44  | 1.405(3) |
| C11  | C12  | 1.389(3) | C43  | C48  | 1.395(3) |
| C13  | C14  | 1.398(3) | C43  | P31  | 1.798(2) |
| C13  | C18  | 1.402(3) | C44  | C45  | 1.390(3) |
| C13  | P1   | 1.795(2) | C45  | C46  | 1.384(3) |
| C14  | C15  | 1.387(3) | C46  | C47  | 1.389(3) |
| C15  | C16  | 1.387(4) | C47  | C48  | 1.390(3) |
| C16  | C17  | 1.383(3) | C49  | C50  | 1.535(3) |
| C17  | C18  | 1.385(3) | C49  | C51  | 1.535(3) |
| C19  | C20  | 1.534(3) | C49  | P31  | 1.822(2) |
| C19  | C21  | 1.537(3) |      |      |          |
| C19  | P1   | 1.821(2) |      |      |          |

**Table S12:** Bond Angles in ° for **2010src0454b**.

| Atom | Atom | Atom | Angle/°    | Atom | Atom | Atom | Angle/°    |
|------|------|------|------------|------|------|------|------------|
| O1   | B1   | O4   | 107.16(17) | O11  | B12  | O17  | 120.38(19) |
| O3   | B1   | O1   | 110.41(16) | O17  | B12  | O12  | 118.46(18) |
| O3   | B1   | O4   | 109.53(19) | O13  | B13  | O12  | 121.1(2)   |
| O3   | B1   | O6   | 109.04(18) | O13  | B13  | O18  | 119.9(2)   |
| O6   | B1   | O1   | 109.58(19) | O18  | B13  | O12  | 118.99(18) |
| O6   | B1   | O4   | 111.10(16) | O14  | B14  | O15  | 121.9(2)   |
| O1   | B2   | O2   | 122.0(2)   | O14  | B14  | O19  | 120.7(2)   |
| O1   | B2   | O7   | 121.4(2)   | O15  | B14  | O19  | 117.38(18) |
| O7   | B2   | O2   | 116.67(18) | O16  | B15  | O15  | 121.6(2)   |
| O3   | B3   | O2   | 120.4(2)   | O16  | B15  | O20  | 122.2(2)   |
| O8   | B3   | O2   | 120.97(19) | O20  | B15  | O15  | 116.21(19) |
| O8   | B3   | O3   | 118.7(2)   | B12  | O11  | B11  | 122.58(16) |
| O4   | B4   | O5   | 120.91(19) | B12  | O12  | B13  | 119.02(16) |
| O4   | B4   | O9   | 120.53(19) | B13  | O13  | B11  | 122.97(17) |
| O9   | B4   | O5   | 118.55(18) | B14  | O14  | B11  | 122.21(18) |
| O6   | B5   | O5   | 121.48(19) | B14  | O15  | B15  | 118.40(17) |
| O6   | B5   | O10  | 120.15(19) | B15  | O16  | B11  | 123.18(18) |
| O10  | B5   | O5   | 118.36(18) | C2   | C1   | P1   | 120.05(16) |
| B2   | O1   | B1   | 122.38(18) | C6   | C1   | C2   | 120.4(2)   |
| B2   | O2   | B3   | 118.55(17) | C6   | C1   | P1   | 119.37(17) |
| B3   | O3   | B1   | 123.39(18) | C3   | C2   | C1   | 119.0(2)   |
| B4   | O4   | B1   | 123.04(16) | C4   | C3   | C2   | 120.2(2)   |
| B4   | O5   | B5   | 118.87(16) | C5   | C4   | C3   | 120.6(2)   |
| B5   | O6   | B1   | 122.94(17) | C4   | C5   | C6   | 120.4(2)   |
| O13  | B11  | O11  | 111.19(16) | C5   | C6   | C1   | 119.3(2)   |
| O13  | B11  | O14  | 108.68(18) | C8   | C7   | P1   | 120.97(16) |
| O14  | B11  | O11  | 106.24(17) | C12  | C7   | C8   | 120.37(19) |
| O16  | B11  | O11  | 109.48(18) | C12  | C7   | P1   | 118.47(15) |
| O16  | B11  | O13  | 110.15(18) | C9   | C8   | C7   | 119.3(2)   |
| O16  | B11  | O14  | 111.03(16) | C10  | C9   | C8   | 120.1(2)   |
| O11  | B12  | O12  | 121.15(19) | C9   | C10  | C11  | 120.7(2)   |

| Atom | Atom | Atom | Angle/°    | Atom | Atom | Atom | Angle/°    |
|------|------|------|------------|------|------|------|------------|
| C10  | C11  | C12  | 120.0(2)   | C35  | C36  | C31  | 120.2(2)   |
| C11  | C12  | C7   | 119.6(2)   | C38  | C37  | C42  | 120.2(2)   |
| C14  | C13  | C18  | 119.6(2)   | C38  | C37  | P31  | 120.44(16) |
| C14  | C13  | P1   | 120.80(17) | C42  | C37  | P31  | 119.08(17) |
| C18  | C13  | P1   | 119.48(16) | C39  | C38  | C37  | 119.4(2)   |
| C15  | C14  | C13  | 119.8(2)   | C40  | C39  | C38  | 120.3(2)   |
| C16  | C15  | C14  | 120.3(2)   | C41  | C40  | C39  | 120.5(2)   |
| C17  | C16  | C15  | 120.1(2)   | C40  | C41  | C42  | 120.3(2)   |
| C16  | C17  | C18  | 120.5(2)   | C41  | C42  | C37  | 119.4(2)   |
| C17  | C18  | C13  | 119.7(2)   | C44  | C43  | P31  | 121.06(16) |
| C20  | C19  | C21  | 110.60(17) | C48  | C43  | C44  | 120.14(19) |
| C20  | C19  | P1   | 110.42(15) | C48  | C43  | P31  | 118.49(15) |
| C21  | C19  | P1   | 110.08(15) | C45  | C44  | C43  | 119.2(2)   |
| C1   | P1   | C7   | 108.96(9)  | C46  | C45  | C44  | 120.4(2)   |
| C1   | P1   | C19  | 109.87(10) | C45  | C46  | C47  | 120.4(2)   |
| C7   | P1   | C19  | 111.31(10) | C46  | C47  | C48  | 120.0(2)   |
| C13  | P1   | C1   | 109.89(10) | C47  | C48  | C43  | 119.8(2)   |
| C13  | P1   | C7   | 108.13(10) | C50  | C49  | C51  | 110.61(17) |
| C13  | P1   | C19  | 108.65(9)  | C50  | C49  | P31  | 110.30(15) |
| C32  | C31  | C36  | 119.5(2)   | C51  | C49  | P31  | 110.12(15) |
| C32  | C31  | P31  | 120.34(16) | C31  | P31  | C43  | 109.40(10) |
| C36  | C31  | P31  | 120.07(17) | C31  | P31  | C49  | 108.88(9)  |
| C33  | C32  | C31  | 119.9(2)   | C37  | P31  | C31  | 108.97(10) |
| C32  | C33  | C34  | 120.0(2)   | C37  | P31  | C43  | 107.84(9)  |
| C35  | C34  | C33  | 120.3(2)   | C37  | P31  | C49  | 110.84(10) |
| C34  | C35  | C36  | 120.0(2)   | C43  | P31  | C49  | 110.87(10) |

**Table S13:** Torsion Angles in ° for **2010src0454b**.

| Atom | Atom | Atom | Atom | Angle/°    |
|------|------|------|------|------------|
| O1   | B1   | O3   | B3   | -19.0(3)   |
| O1   | B1   | O4   | B4   | 131.12(19) |
| O1   | B1   | O6   | B5   | -133.5(2)  |
| O1   | B2   | O2   | B3   | -8.7(3)    |
| O2   | B2   | O1   | B1   | -2.5(3)    |
| O2   | B3   | O3   | B1   | 9.7(3)     |
| O3   | B1   | O1   | B2   | 15.3(3)    |
| O3   | B1   | O4   | B4   | -109.1(2)  |
| O3   | B1   | O6   | B5   | 105.5(2)   |
| O3   | B3   | O2   | B2   | 5.2(3)     |
| O4   | B1   | O1   | B2   | 134.55(19) |
| O4   | B1   | O3   | B3   | -136.7(2)  |
| O4   | B1   | O6   | B5   | -15.3(3)   |
| O4   | B4   | O5   | B5   | -3.6(3)    |
| O5   | B4   | O4   | B1   | -2.8(3)    |
| O5   | B5   | O6   | B1   | 10.5(4)    |
| O6   | B1   | O1   | B2   | -104.8(2)  |
| O6   | B1   | O3   | B3   | 101.5(2)   |
| O6   | B1   | O4   | B4   | 11.4(3)    |
| O6   | B5   | O5   | B4   | -0.2(3)    |
| O7   | B2   | O1   | B1   | 178.25(19) |
| O7   | B2   | O2   | B3   | 170.57(19) |
| O8   | B3   | O2   | B2   | -175.0(2)  |
| O8   | B3   | O3   | B1   | -170.1(2)  |
| O9   | B4   | O4   | B1   | 177.0(2)   |
| O9   | B4   | O5   | B5   | 176.6(2)   |
| O10  | B5   | O5   | B4   | 178.8(2)   |
| O10  | B5   | O6   | B1   | -168.4(2)  |
| O11  | B11  | O13  | B13  | -16.7(3)   |
| O11  | B11  | O14  | B14  | 132.28(19) |

| Atom | Atom | Atom | Atom | Angle/°     |
|------|------|------|------|-------------|
| O11  | B11  | O16  | B15  | -131.3(2)   |
| O11  | B12  | O12  | B13  | -4.3(3)     |
| O12  | B12  | O11  | B11  | -3.0(3)     |
| O12  | B13  | O13  | B11  | 11.1(3)     |
| O13  | B11  | O11  | B12  | 12.6(3)     |
| O13  | B11  | O14  | B14  | -108.0(2)   |
| O13  | B11  | O16  | B15  | 106.2(2)    |
| O13  | B13  | O12  | B12  | 0.4(3)      |
| O14  | B11  | O11  | B12  | 130.70(19)  |
| O14  | B11  | O13  | B13  | -133.3(2)   |
| O14  | B11  | O16  | B15  | -14.3(3)    |
| O14  | B14  | O15  | B15  | -4.6(3)     |
| O15  | B14  | O14  | B11  | -4.7(3)     |
| O15  | B15  | O16  | B11  | 6.6(3)      |
| O16  | B11  | O11  | B12  | -109.3(2)   |
| O16  | B11  | O13  | B13  | 104.9(2)    |
| O16  | B11  | O14  | B14  | 13.3(3)     |
| O16  | B15  | O15  | B14  | 3.8(3)      |
| O17  | B12  | O11  | B11  | 176.84(19)  |
| O17  | B12  | O12  | B13  | 175.9(2)    |
| O18  | B13  | O12  | B12  | 179.2(2)    |
| O18  | B13  | O13  | B11  | -167.8(2)   |
| O19  | B14  | O14  | B11  | 176.54(19)  |
| O19  | B14  | O15  | B15  | 174.25(19)  |
| O20  | B15  | O15  | B14  | -175.23(19) |
| O20  | B15  | O16  | B11  | -174.5(2)   |
| C1   | C2   | C3   | C4   | 0.7(3)      |
| C2   | C1   | C6   | C5   | -1.6(3)     |
| C2   | C1   | P1   | C7   | -96.67(18)  |
| C2   | C1   | P1   | C13  | 145.03(16)  |
| C2   | C1   | P1   | C19  | 25.53(19)   |
| C2   | C3   | C4   | C5   | -1.4(3)     |
| C3   | C4   | C5   | C6   | 0.7(4)      |
| C4   | C5   | C6   | C1   | 0.8(4)      |
| C6   | C1   | C2   | C3   | 0.8(3)      |
| C6   | C1   | P1   | C7   | 78.79(19)   |
| C6   | C1   | P1   | C13  | -39.51(19)  |
| C6   | C1   | P1   | C19  | -159.01(17) |
| C7   | C8   | C9   | C10  | -0.1(3)     |
| C8   | C7   | C12  | C11  | 0.2(3)      |
| C8   | C7   | P1   | C1   | 92.88(19)   |
| C8   | C7   | P1   | C13  | -147.71(17) |
| C8   | C7   | P1   | C19  | -28.4(2)    |
| C8   | C9   | C10  | C11  | 0.0(3)      |
| C9   | C10  | C11  | C12  | 0.2(4)      |
| C10  | C11  | C12  | C7   | -0.3(3)     |
| C12  | C7   | C8   | C9   | 0.1(3)      |
| C12  | C7   | P1   | C1   | -82.12(18)  |
| C12  | C7   | P1   | C13  | 37.29(19)   |
| C12  | C7   | P1   | C19  | 156.56(16)  |
| C13  | C14  | C15  | C16  | 1.2(4)      |
| C14  | C13  | C18  | C17  | 0.6(3)      |
| C14  | C13  | P1   | C1   | -27.9(2)    |
| C14  | C13  | P1   | C7   | -146.74(17) |
| C14  | C13  | P1   | C19  | 92.32(19)   |
| C14  | C15  | C16  | C17  | 0.6(4)      |
| C15  | C16  | C17  | C18  | -1.8(4)     |
| C16  | C17  | C18  | C13  | 1.2(3)      |
| C18  | C13  | C14  | C15  | -1.8(3)     |
| C18  | C13  | P1   | C1   | 155.49(16)  |
| C18  | C13  | P1   | C7   | 36.67(19)   |
| C18  | C13  | P1   | C19  | -84.27(18)  |

| Atom | Atom | Atom | Atom | Angle/°     |
|------|------|------|------|-------------|
| C20  | C19  | P1   | C1   | -178.79(14) |
| C20  | C19  | P1   | C7   | -58.00(17)  |
| C20  | C19  | P1   | C13  | 60.95(17)   |
| C21  | C19  | P1   | C1   | 58.82(17)   |
| C21  | C19  | P1   | C7   | 179.61(15)  |
| C21  | C19  | P1   | C13  | -61.44(18)  |
| P1   | C1   | C2   | C3   | 176.25(16)  |
| P1   | C1   | C6   | C5   | -177.04(18) |
| P1   | C7   | C8   | C9   | -174.84(16) |
| P1   | C7   | C12  | C11  | 175.19(17)  |
| P1   | C13  | C14  | C15  | -178.35(17) |
| P1   | C13  | C18  | C17  | 177.20(16)  |
| C31  | C32  | C33  | C34  | -0.5(3)     |
| C32  | C31  | C36  | C35  | 1.7(3)      |
| C32  | C31  | P31  | C37  | -152.52(17) |
| C32  | C31  | P31  | C43  | -34.8(2)    |
| C32  | C31  | P31  | C49  | 86.47(19)   |
| C32  | C33  | C34  | C35  | 1.1(4)      |
| C33  | C34  | C35  | C36  | -0.4(4)     |
| C34  | C35  | C36  | C31  | -1.0(4)     |
| C36  | C31  | C32  | C33  | -0.9(3)     |
| C36  | C31  | P31  | C37  | 30.7(2)     |
| C36  | C31  | P31  | C43  | 148.35(17)  |
| C36  | C31  | P31  | C49  | -90.34(19)  |
| C37  | C38  | C39  | C40  | -0.5(3)     |
| C38  | C37  | C42  | C41  | 1.3(3)      |
| C38  | C37  | P31  | C31  | -146.52(16) |
| C38  | C37  | P31  | C43  | 94.81(18)   |
| C38  | C37  | P31  | C49  | -26.73(19)  |
| C38  | C39  | C40  | C41  | 0.6(3)      |
| C39  | C40  | C41  | C42  | 0.3(3)      |
| C40  | C41  | C42  | C37  | -1.2(3)     |
| C42  | C37  | C38  | C39  | -0.4(3)     |
| C42  | C37  | P31  | C31  | 39.81(19)   |
| C42  | C37  | P31  | C43  | -78.85(18)  |
| C42  | C37  | P31  | C49  | 159.61(16)  |
| C43  | C44  | C45  | C46  | 0.0(3)      |
| C44  | C43  | C48  | C47  | -0.5(3)     |
| C44  | C43  | P31  | C31  | 147.61(17)  |
| C44  | C43  | P31  | C37  | -94.01(18)  |
| C44  | C43  | P31  | C49  | 27.5(2)     |
| C44  | C45  | C46  | C47  | -0.2(3)     |
| C45  | C46  | C47  | C48  | 0.0(3)      |
| C46  | C47  | C48  | C43  | 0.4(3)      |
| C48  | C43  | C44  | C45  | 0.3(3)      |
| C48  | C43  | P31  | C31  | -38.77(19)  |
| C48  | C43  | P31  | C37  | 79.61(18)   |
| C48  | C43  | P31  | C49  | -158.87(16) |
| C50  | C49  | P31  | C31  | 61.19(18)   |
| C50  | C49  | P31  | C37  | -58.66(17)  |
| C50  | C49  | P31  | C43  | -178.40(15) |
| C51  | C49  | P31  | C31  | -61.17(16)  |
| C51  | C49  | P31  | C37  | 178.98(14)  |
| C51  | C49  | P31  | C43  | 59.24(16)   |
| P31  | C31  | C32  | C33  | -177.73(17) |
| P31  | C31  | C36  | C35  | 178.48(17)  |
| P31  | C37  | C38  | C39  | -173.99(16) |
| P31  | C37  | C42  | C41  | 174.97(16)  |
| P31  | C43  | C44  | C45  | 173.84(16)  |
| P31  | C43  | C48  | C47  | -174.22(17) |

**Table S14:** Hydrogen Fractional Atomic Coordinates ( $\times 10^4$ ) and Equivalent Isotropic Displacement Parameters ( $\text{\AA}^2 \times 10^3$ ) for **2010src0454b**.  $U_{eq}$  is defined as 1/3 of the trace of the orthogonalised  $U_{ij}$ .

| Atom | x        | y        | z        | $U_{eq}$ |
|------|----------|----------|----------|----------|
| H7   | 3372.18  | 3114.26  | 3266.71  | 37       |
| H8A  | 2375.5   | 7189.35  | 2463.1   | 55       |
| H9A  | -2984.18 | 3371.48  | 1622.79  | 41       |
| H10A | -4543.55 | 4146.1   | 3287.41  | 57       |
| H17A | 1660.29  | 8320.37  | -3390.73 | 40       |
| H18A | 81.14    | 9051.02  | -1716.59 | 59       |
| H19A | 8024.87  | 8132.46  | -1790.71 | 41       |
| H20  | 5600.84  | 12328.89 | -2857.82 | 50       |
| H2   | 2738.33  | 9360.84  | -860.01  | 33       |
| H3   | 2081.06  | 11093.92 | -952.61  | 43       |
| H4   | 1446.83  | 11704.61 | -123.93  | 43       |
| H5   | 1363.42  | 10600.02 | 795.72   | 48       |
| H6   | 1960.55  | 8858.66  | 904.66   | 39       |
| H8   | 992.87   | 6932.03  | -627.07  | 28       |
| H9   | -1329.56 | 6201.38  | -466.56  | 35       |
| H10  | -2576.27 | 5782.91  | 470.24   | 35       |
| H11  | -1534.42 | 6083.27  | 1255.65  | 36       |
| H12  | 775.94   | 6822.07  | 1105.64  | 30       |
| H14  | 4737.07  | 8432.71  | 745.14   | 33       |
| H15  | 6003.32  | 7743.21  | 1555.75  | 40       |
| H16  | 5836.37  | 6003.12  | 2027.46  | 38       |
| H17  | 4442.17  | 4939.83  | 1681.45  | 35       |
| H18  | 3100.32  | 5619.73  | 893.85   | 29       |
| H19  | 3425.61  | 7677.85  | -875.86  | 26       |
| H20A | 4842.69  | 6149.85  | -823.65  | 42       |
| H20B | 3339.38  | 5893.88  | -406.17  | 42       |
| H20C | 4826.38  | 5970.21  | -133.02  | 42       |
| H21A | 5931.96  | 7718.01  | -266.4   | 47       |
| H21B | 5187.74  | 8709.04  | -662.64  | 47       |
| H21C | 6013.32  | 7860.08  | -956.61  | 47       |
| H32  | 1663.65  | 9350.89  | 4036.8   | 33       |
| H33  | 304.34   | 9964.48  | 3244.93  | 42       |
| H34  | -1091.03 | 8840.24  | 2940.19  | 45       |
| H35  | -1195.75 | 7117.6   | 3440.18  | 41       |
| H36  | 115.22   | 6501.46  | 4244.46  | 34       |
| H38  | 2235.98  | 5608.19  | 5797.34  | 32       |
| H39  | 3087.24  | 3922.73  | 5864.31  | 40       |
| H40  | 3814.87  | 3367.9   | 5022.77  | 41       |
| H41  | 3736.13  | 4490.38  | 4107.35  | 41       |
| H42  | 2949.53  | 6193.96  | 4025.34  | 32       |
| H44  | 3770.26  | 8102.59  | 5593.95  | 28       |
| H45  | 6075.21  | 8849.56  | 5446.04  | 33       |
| H46  | 7364.76  | 9267.31  | 4518.11  | 36       |
| H47  | 6377.98  | 8940.05  | 3725.87  | 34       |
| H48  | 4082.54  | 8184.29  | 3863.23  | 28       |
| H49  | 1416.42  | 7301.23  | 5834.17  | 26       |
| H50A | -1143.35 | 7035.75  | 5931.42  | 46       |
| H50B | -284.34  | 6222.16  | 5618.65  | 46       |
| H50C | -1095.84 | 7200.9   | 5240.55  | 46       |
| H51A | -71.85   | 8968.35  | 5096.21  | 43       |
| H51B | 1404.25  | 9085.95  | 5366.37  | 43       |
| H51C | -86.92   | 8793.03  | 5786.52  | 43       |
| H61A | -250.21  | 8265.1   | -2763.56 | 41       |
| H61B | -691.84  | 7464.52  | -2958.77 | 41       |
| H62A | 5960.61  | 8640.33  | -3340.39 | 42       |
| H62B | 7446.29  | 8445.32  | -3337.11 | 42       |
| H63A | 5362.57  | 7546.61  | -2088.5  | 37       |
| H63B | 4889.22  | 6749.75  | -2278.75 | 37       |
| H64A | 518.61   | 8413.44  | 1938.97  | 93       |

| Atom | x        | y       | z       | $U_{eq}$ |
|------|----------|---------|---------|----------|
| H64B | -441.32  | 9203.34 | 1730.99 | 93       |
| H65A | -1583.22 | 7549.21 | 2154.15 | 85       |
| H65B | -1273.76 | 6519.81 | 2358.7  | 85       |
| H66A | 6526.28  | 6849.47 | 2895.27 | 71       |
| H66B | 5608.65  | 6082.09 | 3211.08 | 71       |
| H67A | 1325.9   | 3594.9  | 1702.74 | 42       |
| H67B | 2818.99  | 3426.48 | 1692.98 | 42       |

**Table S15:** Hydrogen Bond information for **2010src0454b**.

| D   | H    | A                | d(D-H)/Å | d(H-A)/Å | d(D-A)/Å   | D-H-A/deg |
|-----|------|------------------|----------|----------|------------|-----------|
| 07  | H7   | O62 <sup>1</sup> | 0.84     | 1.87     | 2.695(2)   | 168.1     |
| 08  | H8A  | O20 <sup>2</sup> | 0.84     | 1.87     | 2.685(2)   | 161.9     |
| 09  | H9A  | O63 <sup>3</sup> | 0.84     | 2.07     | 2.874(2)   | 160.8     |
| 010 | H10A | O7 <sup>4</sup>  | 0.84     | 1.90     | 2.734(2)   | 170.9     |
| 017 | H17A | O61              | 0.84     | 2.06     | 2.871(2)   | 162.3     |
| 018 | H18A | O19 <sup>4</sup> | 0.84     | 1.87     | 2.703(2)   | 171.4     |
| 020 | H20  | O66 <sup>2</sup> | 0.84     | 1.88     | 2.703(3)   | 166.8     |
| 061 | H61A | O12              | 0.87     | 2.18     | 2.8776(19) | 136.7     |
| 061 | H61B | O1 <sup>3</sup>  | 0.87     | 1.85     | 2.711(2)   | 170.1     |
| 062 | H62A | O11              | 0.87     | 1.93     | 2.788(2)   | 167.8     |
| 062 | H62B | O61 <sup>5</sup> | 0.87     | 2.04     | 2.840(2)   | 153.2     |
| 063 | H63A | O14              | 0.87     | 1.84     | 2.698(2)   | 169.7     |
| 063 | H63B | O5 <sup>3</sup>  | 0.87     | 2.21     | 2.8865(19) | 134.5     |
| 064 | H64A | O8               | 0.87     | 2.15     | 2.829(3)   | 134.4     |
| 064 | H64B | O18 <sup>6</sup> | 0.87     | 2.07     | 2.936(3)   | 176.2     |
| 065 | H65A | O64              | 0.87     | 1.87     | 2.714(3)   | 162.9     |
| 065 | H65B | O3               | 0.87     | 1.94     | 2.797(2)   | 170.8     |
| 066 | H66A | O65 <sup>5</sup> | 0.87     | 1.81     | 2.679(3)   | 173.0     |
| 066 | H66B | O10 <sup>5</sup> | 0.87     | 2.27     | 3.069(3)   | 151.8     |
| 067 | H67A | O4               | 0.87     | 1.91     | 2.777(2)   | 171.9     |
| 067 | H67B | O63 <sup>1</sup> | 0.87     | 2.05     | 2.856(2)   | 153.6     |

-----  
<sup>1</sup>1-x,1-y,-z; <sup>2</sup>1-x,2-y,-z; <sup>3</sup>-x,1-y,-z; <sup>4</sup>-1+x,+y,+z; <sup>5</sup>1+x,+y,+z; <sup>6</sup>-x,2-y,-z

## Citations for 2

COLLECT (Hooft, R.W.W., 1998)

DENZO (Otwinowski & Minor, 1997)

O.V. Dolomanov and L.J. Bourhis and R.J. Gildea and J.A.K. Howard and H. Puschmann, Olex2: A complete structure solution, refinement and analysis program, *J. Appl. Cryst.*, (2009), **42**, 339-341.

Sheldrick, G.M., A short history of ShelX, *Acta Cryst.*, (2008), **A64**, 339-341.

Sheldrick, G.M., Crystal structure refinement with ShelXL, *Acta Cryst.*, (2015), **C71**, 3-8.



TGA plots for  $[\text{MePPh}_3][\text{B}_5\text{O}_6(\text{OH})_4] \cdot 2\text{H}_2\text{O}$  (**1**) and  
 $[\text{iPrPPh}_3][\text{B}_5\text{O}_6(\text{OH})_4] \cdot 3.5\text{H}_2\text{O}$  (**2**).

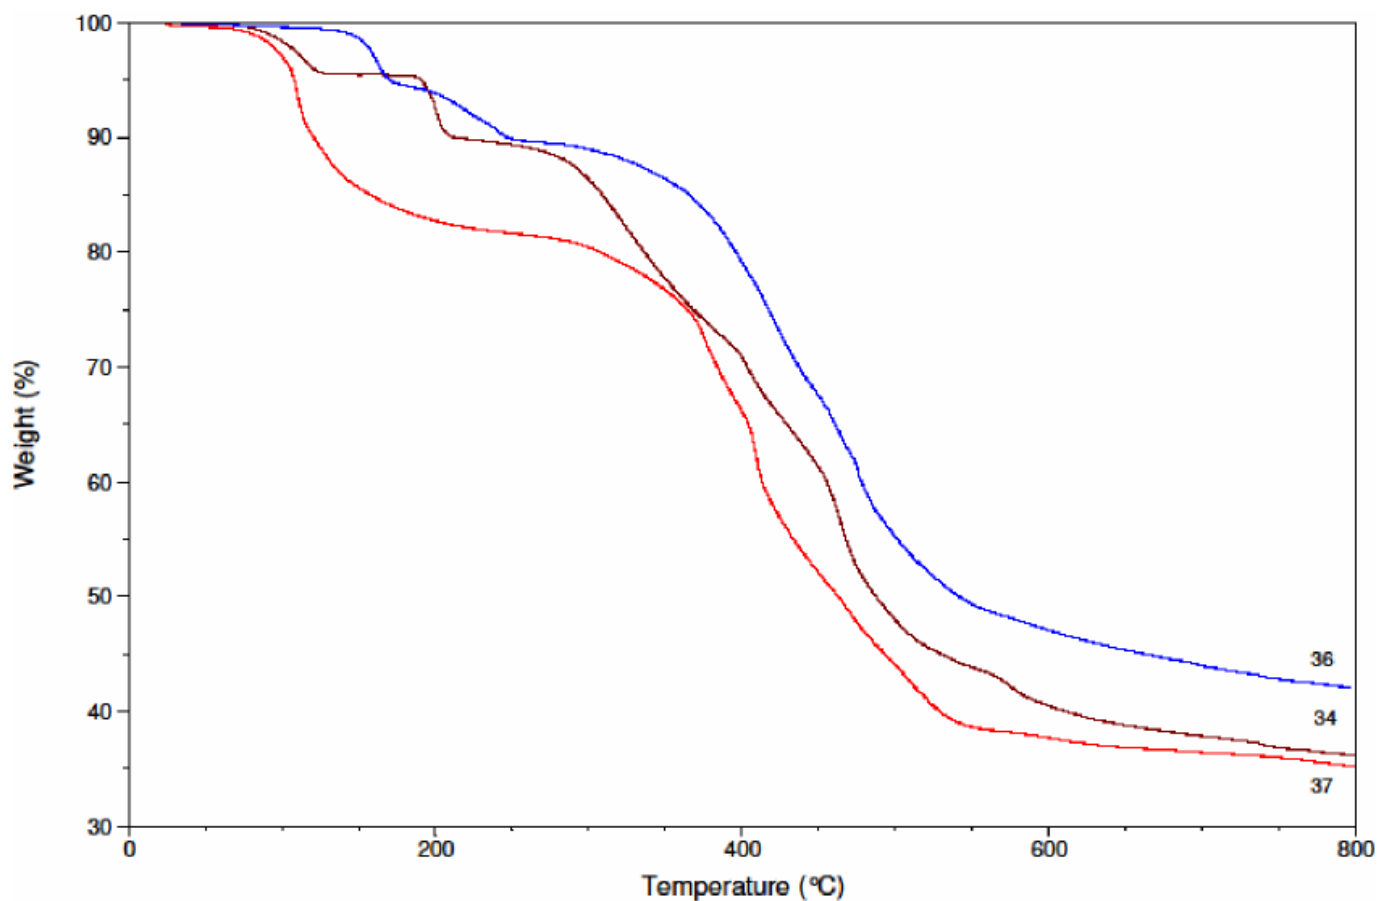

Figure S10. TGA data for the thermal decomposition of tetraalkylphosphonium pentaborate salts. The plot labelled '36' is  $[\text{MePPh}_3][\text{B}_5\text{O}_6(\text{OH})_4] \cdot 2\text{H}_2\text{O}$  (**1**) that labelled '37' is  $[\text{iPrPPh}_3][\text{B}_5\text{O}_6(\text{OH})_4] \cdot 3.5\text{H}_2\text{O}$  (**2**). For comparison the line labelled '34' is  $[\text{PPh}_4][\text{B}_5\text{O}_6(\text{OH})_4] \cdot 1.5\text{H}_2\text{O}$ . (Taken from Ref. 39 in Manuscript).
