# Supplementary material for: Synthesis and Thermal Studies of Two Phosphonium Tetrahydroxidohexaoxidopentaborate(1-) Salts: Single-Crystal XRD Characterization of [iPrPPh3][B5O6(OH)4]·3.5H2O and [MePPh3][B5O6(OH)4]·B(OH)3·0.5H2O
Source: Molecules. 2023 Sep 29;28(19):6867. doi: 10.3390/molecules28196867 (PMC10574587; doi:10.3390/molecules28196867)
Supplement: Supplementary file 1 [file molecules-28-06867-s001.zip]

Archive with 6 entries (6 files):
- Electronic Supplementary data.odt
- Electronic Supplementary data.pdf
- MAB1.cif
- MAB1_checkcif.pdf
- MAB2.cif
- MAB2_checkcif.pdf
