# Supplementary material for: Synthesis and Thermal Studies of Two Phosphonium Tetrahydroxidohexaoxidopentaborate(1-) Salts: Single-Crystal XRD Characterization of [iPrPPh3][B5O6(OH)4]·3.5H2O and [MePPh3][B5O6(OH)4]·B(OH)3·0.5H2O
Source: Molecules. 2023 Sep 29;28(19):6867. doi: 10.3390/molecules28196867 (PMC10574587; doi:10.3390/molecules28196867)
Supplement: Supplementary file 1 [file molecules-28-06867-s001.zip › Electronic Supplementary data.odt]

			Electronic Supplementary data 
					
Synthesis and thermal studies of two phosphonium tetrahydroxidohexaoxidopentaborate(1-) salts: single-crystal XRD characterization of [iPrPPh3][B5O6(OH)4].3.5H2O and [MePPh3][B5O6(OH)4].B(OH)3.0.5H2O


Michael A. Beckett 1*, Peter N. Horton2, Michael B. Hursthouse,b and James L Timmis,a
1	School of Natural Sciences, Bangor University, Bangor, Gwynedd, LL57 2UW, UK;
2	Chemistry Department, University of Southampton, Southampton, SO17 1BJ, UK;
*	Correspondence: m.a.beckett@bangor.ac..uk 


Contains sc-XRD data and TGA data for [iPrPPh3][B5O6(OH)4].3.5H2O (1)  and [MePPh3][B5O6(OH)4].B(OH)3.0.5H2O (2)


A blue and black rectangle

Description automatically generated

[iPrPPh3][B5O6(OH)4].3.5H2O Compound 1


Submitted by: 	Mike A Beckett
		Bangor University
Solved by: 	Peter N Horton
Sample ID: 	MAB/JT/23
R1=7.42%
Crystal Data and Experimental
A group of colorful molecules

Description automatically generated with medium confidence
Experimental. Single colourless cut block-shaped crystals of 2009src0115 (1) were used as supplied. A suitable crystal with dimensions 0.200 × 0.130 × 0.070 mm3 was selected and mounted on a Bruker-Nonius APEX II CCD camera on k-goniostat diffractometer. The crystal was kept at a steady T = 120(2) K during data collection. The structure was solved with the ShelXS-97 (Sheldrick, 1997a) solution program using direct methods and by using Olex2 1.5-alpha (Dolomanov et al., 2009) as the graphical interface. The model was refined with ShelXL 2018/3 (Sheldrick, 2015) using full matrix least squares minimisation on F2.
Crystal Data. C38H52B12O27P2, Mr = 1132.45, triclinic, P-1 (No. 2), a = 10.1076(10) Å, b = 13.0403(10) Å, c = 20.6260(15) Å, a = 84.364(5)°, b = 82.811(4)°, g = 76.492(4)°, V = 2615.9(4) Å3, T = 120(2) K, Z = 2, Z' = 1, m(MoKa) = 0.172 mm-1, 35616 reflections measured, 12083 unique (Rint = 0.0649) which were used in all calculations. The final wR2 was 0.1676 (all data) and R1 was 0.0742 (I≥2 s(I)).
Compound 1 
2009src0115 
 
 
Formula 
C38H52B12O27P2 
Dcalc./ g cm-3 
1.438 
m/mm-1 
0.172 
Formula Weight 
1132.45 
Colour 
colourless 
Shape 
cut block-shaped 
Size/mm3 
0.200×0.130×0.070 
T/K 
120(2) 
Crystal System 
triclinic 
Space Group 
P-1 
a/Å 
10.1076(10) 
b/Å 
13.0403(10) 
c/Å 
20.6260(15) 
a/° 
84.364(5) 
b/° 
82.811(4) 
g/° 
76.492(4) 
V/Å3 
2615.9(4) 
Z 
2 
Z' 
1 
Wavelength/Å 
0.71073 
Radiation type 
MoKa 
Qmin/° 
2.994 
Qmax/° 
27.938 
Measured Refl's. 
35616 
Indep't Refl's 
12083 
Refl's I≥2 s(I) 
9025 
Rint 
0.0649 
Parameters 
735 
Restraints 
1 
Largest Peak 
1.103 
Deepest Hole 
-1.031 
GooF 
1.040 
wR2 (all data) 
0.1676 
wR2 
0.1485 
R1 (all data) 
0.1044 
R1 
0.0742 
Structure Quality Indicators
Reflections:

Refinement:

A colourless cut block-shaped-shaped crystal with dimensions 0.200 × 0.130 × 0.070 mm3 was mounted. Data were collected using a Bruker-Nonius APEX II CCD camera on k-goniostat diffractometer equipped with an Oxford Cryosystems low-temperature device operating at T = 120(2) K.
Data were measured using f & w scans with MoKa radiation. The diffraction pattern was indexed and the total number of runs and images was based on the strategy calculation from the program COLLECT (Hooft, R.W.W., 1998). The maximum resolution that was achieved was Q = 27.938° (0.76 Å).
The unit cell was refined using DENZO (Otwinowski & Minor, 1997) & COLLECT (Hooft, R.W.W., 1998) on 1919 reflections, 5% of the observed reflections.
Data reduction, scaling and absorption corrections were performed using DENZO (Otwinowski & Minor, 1997) & COLLECT (Hooft, R.W.W., 1998). The final completeness is 98.80 % out to 27.938° in Q. SADABS 2007/2 (Sheldrick, G.M., 2007).  The absorption coefficient m of this material is 0.172 mm-1 at this wavelength (l = 0.71073Å) and the minimum and maximum transmissions are 0.967 and 0.988.
The structure was solved and the space group P-1 (# 2) determined by the ShelXS-97 (Sheldrick, 1997a) structure solution program using using direct methods and refined by full matrix least squares minimisation on F2 using version 2018/3 of ShelXL 2018/3 (Sheldrick, 2015). All non-hydrogen atoms were refined anisotropically. Hydrogen atom positions were calculated geometrically and refined using the riding model.
_refine_special_details: There was a disordered water molecule over 4 sites (and symmetry related) for which some constraints were applied.
_exptl_absorpt_process_details: SADABS 2007/2 (Sheldrick, G.M., 2007)
There is a single formula unit in the asymmetric unit, which is represented by the reported sum formula. In other words: Z is 2 and Z' is 1. The moiety formula is 2(B5 H4 O10), 2(C19 H18 P), 2(B H3 O3), H2 O.
A close-up of a molecule

Description automatically generated
Figure S1 The following hydrogen bonding interactions with a maximum D-D distance of 2.9 Å and a minimum angle of 120 ° are present in 2009src0115: O7–O31_1: 2.714 Å, O8–O32_2: 2.748 Å, O9–O11_3: 2.828 Å, O10–O6_4: 2.803 Å, O17–O4_5: 2.779 Å, O18–O13_6: 2.764 Å, O19–O7_7: 2.673 Å, O20–O44: 2.622 Å, O20–O43: 2.676 Å, O20–O42_8: 3.057 Å, O21–O19: 2.676 Å, O22–O14: 2.695 Å, O23–O20_5: 2.71 Å, O31–O23: 2.699 Å, O32–O21: 2.671 Å, O33–O1_9: 2.696 Å.

A close up of a structure

Description automatically generated
Figure S2 Packing diagram of 2009src0115 viewed along the a axis

A structure of a molecule

Description automatically generated
Figure S3 Packing diagram of 2009src0115 viewed along the b axis

A close up of a molecule

Description automatically generated
Figure S4 Packing diagram of 2009src0115 viewed along the c axis

Table S1: Fractional Atomic Coordinates (×104) and Equivalent Isotropic Displacement Parameters (Å2×103) for 2009src0115. Ueq is defined as 1/3 of the trace of the orthogonalised Uij.

Atom
x
y
z
Ueq
B1
724(3)
9085(2)
1353.6(16)
18.1(6)
B2
496(3)
10658(3)
1971.2(15)
18.8(6)
B3
2684(3)
9788(3)
1527.8(15)
18.7(6)
B4
-437(4)
7598(3)
1487.6(16)
20.6(7)
B5
-654(4)
8746(3)
515.1(17)
24.0(7)
O1
-71(2)
9965.8(15)
1734.1(10)
19.8(4)
O2
1879(2)
10587.2(16)
1901.3(10)
21.3(4)
O3
2159(2)
9067.2(16)
1296.2(10)
20.5(4)
O4
449(2)
8100.0(15)
1688.8(10)
20.1(4)
O5
-1000(2)
7903.4(18)
899.8(10)
28.4(5)
O6
255(2)
9249.4(16)
696.4(9)
20.9(4)
O7
-280(2)
11473.3(17)
2308.9(11)
24.3(5)
O8
4030(2)
9755.8(18)
1413.1(11)
26.6(5)
O9
-835(2)
6768.2(17)
1843.6(11)
27.7(5)
O10
-1242(3)
9043.2(19)
-48.7(11)
32.2(5)
B11
9639(3)
5489(3)
3504.2(16)
18.5(6)
B12
10908(4)
6910(3)
3301.9(16)
21.7(7)
B13
10940(3)
5921(3)
4339.0(16)
20.2(7)
B14
9933(3)
3771(2)
3023.0(15)
17.5(6)
B15
7713(4)
4750(3)
3319.3(17)
22.6(7)
O11
10005(2)
6405.1(15)
3119.3(10)
20.1(4)
O12
11450(2)
6637.1(17)
3899.9(10)
25.8(5)
O13
9963(2)
5459.6(15)
4187.4(9)
18.9(4)
O14
10474(2)
4526.3(15)
3216.5(10)
18.6(4)
O15
8558(2)
3867.3(16)
3051.5(11)
23.1(4)
O16
8209(2)
5524.2(15)
3509.5(10)
19.4(4)
O17
11338(3)
7704.6(18)
2929.6(11)
30.8(5)
O18
11464(2)
5726.8(17)
4927.1(10)
24.4(5)
O19
10787(2)
2883.1(16)
2801.5(11)
23.1(4)
O20
6372(2)
4753.9(19)
3372.3(14)
38.8(6)
C1
1443(3)
9935(3)
3597.2(16)
31.0(7)
C2
2938(3)
11214(2)
4188.1(14)
21.3(6)
C3
1791(3)
11967(2)
4383.6(16)
27.8(7)
C4
1920(4)
12954(3)
4517.2(16)
32.9(8)
C5
3181(4)
13189(3)
4458.9(16)
30.5(7)
C6
4316(3)
12459(3)
4255.3(15)
28.2(7)
C7
4201(3)
11462(3)
4117.4(15)
25.8(7)
C8
2416(3)
9300(2)
4887.8(14)
21.6(6)
C9
2448(3)
9808(2)
5448.3(15)
22.4(6)
C10
2229(3)
9302(2)
6060.4(15)
24.8(6)
C11
1996(3)
8290(3)
6112.9(15)
24.9(6)
C12
1956(3)
7787(3)
5558.7(16)
26.4(7)
C13
2159(3)
8287(2)
4942.0(15)
25.8(6)
C14
4329(3)
9167(2)
3719.8(15)
23.2(6)
C15
4619(4)
9291(3)
3045.9(16)
32.9(8)
C16
5833(4)
8745(3)
2753.0(17)
37.8(9)
C17
6762(4)
8091(3)
3132.7(17)
33.1(8)
C18
6479(3)
7969(3)
3792.9(17)
32.9(8)
C19
5266(3)
8504(3)
4091.0(16)
29.4(7)
P1
2782.9(8)
9903.2(6)
4091.9(4)
21.23(17)
C21
5479(5)
8645(3)
43(2)
53.4(12)
C22
4182(4)
7103(3)
-416.9(18)
39.3(9)
C23
4480(4)
6349(3)
-883.1(18)
37.1(8)
C24
3499(4)
6210(3)
-1252(2)
46.2(10)
C25
2200(5)
6820(4)
-1160(2)
63.1(15)
C26
1896(5)
7569(4)
-700(2)
67.0(15)
C27
2868(4)
7719(4)
-329(2)
54.4(12)
C28
5150(4)
6788(3)
878.3(17)
33.1(8)
C29
3940(4)
6475(3)
1094.6(18)
34.7(8)
C30
3696(4)
6175(3)
1750.2(19)
40.7(9)
C31
4630(4)
6184(3)
2178(2)
43.9(9)
C32
5839(4)
6477(3)
1959.1(19)
43.9(9)
C33
6090(4)
6797(3)
1305.9(19)
40.7(9)
C34
7034(4)
6566(3)
-307.2(17)
31.9(7)
C35
7682(4)
7027(3)
-852.6(18)
40.5(9)
C36
8805(4)
6438(4)
-1178.9(19)
49.8(11)
C37
9298(4)
5397(4)
-977.0(19)
45.8(10)
C38
8674(4)
4934(3)
-434(2)
42.7(9)
C39
7537(4)
5518(3)
-98.7(19)
38.5(9)
P21
5461.1(10)
7279.1(7)
50.5(5)
33.9(2)
B21
13973(3)
3538(3)
2828.6(17)
21.4(7)
O21
13483(2)
2766.1(18)
2592.5(12)
30.1(5)
O22
13187(2)
4426.4(16)
3070.1(11)
24.2(5)
O23
15345(2)
3365.8(17)
2800.9(11)
26.9(5)
B31
16446(4)
1037(3)
1954.3(18)
25.0(7)
O31
16996(2)
1576.6(17)
2357.6(11)
26.5(5)
O32
15094(2)
1259.1(18)
1881.6(12)
30.3(5)
O33
17238(2)
252.4(19)
1616.4(12)
33.8(6)
O42
5273(10)
4515(7)
5343(3)
42.6(17)
O41
4373(11)
5477(8)
5093(3)
42.6(17)
O43
4513(4)
6026(4)
4149(3)
42.6(17)
O44
4456(5)
6289(4)
3863(3)
42.6(17)

Table S2: Anisotropic Displacement Parameters (×104) for 2009src0115. The anisotropic displacement factor exponent takes the form: -2p2[h2a*2 × U11+ ... +2hka* × b* × U12]

Atom
U11
U22
U33
U23
U13
U12
B1
19.8(16)
15.8(15)
19.2(15)
-2.2(12)
-2.1(12)
-4.5(12)
B2
20.0(16)
19.5(15)
16.8(15)
-1.4(12)
-1.5(12)
-4.3(12)
B3
19.4(16)
20.6(15)
15.8(14)
1.7(12)
-1.0(12)
-5.7(12)
B4
24.6(17)
19.5(16)
17.8(15)
-2.1(13)
1.8(12)
-7.0(13)
B5
31.6(19)
23.2(17)
19.8(16)
-2.0(14)
-1.7(14)
-11.9(14)
O1
16.7(10)
20.2(10)
22.8(10)
-6.3(8)
0.0(8)
-4.0(8)
O2
17.6(10)
23.9(10)
24.6(10)
-6.4(9)
-2.8(8)
-6.9(8)
O3
17.9(10)
20.5(10)
23.2(10)
-5.1(8)
1.9(8)
-5.2(8)
O4
21.9(10)
18.8(10)
20.2(10)
-1.3(8)
-1.0(8)
-6.4(8)
O5
37.3(13)
30.5(12)
24.7(11)
3.6(9)
-9.1(9)
-21.8(10)
O6
25.5(11)
19.9(10)
18.5(10)
-2.1(8)
-0.5(8)
-8.5(8)
O7
17.9(10)
26.6(11)
30.0(11)
-11.2(9)
-3.0(9)
-4.4(9)
O8
17.9(11)
33.6(12)
29.9(12)
-6.5(10)
0.5(9)
-9.0(9)
O9
35.9(13)
26.8(11)
25.1(11)
2.2(9)
-4.7(10)
-17.2(10)
O10
47.0(15)
33.5(13)
24.2(11)
4.6(10)
-12.5(10)
-23.7(11)
B11
19.9(16)
17.2(15)
18.4(15)
-0.1(12)
-3.0(12)
-4.3(12)
B12
24.2(17)
24.1(17)
18.3(15)
-3.2(13)
-1.3(13)
-8.3(13)
B13
21.3(16)
21.6(16)
18.4(15)
-3.8(13)
-0.6(12)
-6.2(13)
B14
18.6(15)
16.9(15)
16.9(14)
-1.8(12)
-1.5(12)
-3.5(12)
B15
20.9(17)
22.5(16)
25.8(17)
-0.7(14)
-5.3(13)
-6.2(13)
O11
22.0(11)
18.2(10)
20.7(10)
-0.1(8)
-3.0(8)
-5.9(8)
O12
28.2(12)
32.8(12)
21.1(10)
-1.1(9)
-3.1(9)
-16.4(10)
O13
22.5(10)
18.0(10)
17.7(9)
-1.5(8)
-2.7(8)
-7.3(8)
O14
16.1(10)
18.1(10)
22.5(10)
-4.9(8)
-1.4(8)
-4.6(8)
O15
16.7(10)
19.6(10)
34.5(12)
-5.7(9)
-4.1(9)
-4.6(8)
O16
15.9(10)
17.7(10)
24.4(10)
-3.6(8)
-1.7(8)
-2.5(8)
O17
43.3(14)
33.8(12)
22.3(11)
1.2(10)
-4.3(10)
-23.8(11)
O18
27.4(12)
27.8(12)
21.1(10)
-0.4(9)
-4.6(9)
-12.1(9)
O19
20.6(11)
19.5(10)
30.2(11)
-9.9(9)
1.2(9)
-5.1(8)
O20
16.6(11)
34.5(14)
66.6(18)
-14.6(13)
-4.3(11)
-3.8(10)
C1
24.2(16)
38.5(19)
30.3(17)
-2.4(15)
-10.5(13)
-3.1(14)
C2
21.6(15)
21.0(14)
18.1(13)
1.0(11)
-2.2(11)
0.6(11)
C3
25.7(16)
24.6(16)
29.7(17)
2.4(13)
-0.4(13)
-1.6(13)
C4
34.8(19)
25.7(16)
29.6(17)
-0.2(14)
3.2(14)
6.5(14)
C5
42(2)
21.9(16)
25.9(16)
-0.5(13)
-4.7(14)
-3.8(14)
C6
30.2(17)
30.3(17)
24.7(16)
3.7(13)
-6.9(13)
-8.3(14)
C7
20.7(15)
28.4(16)
24.5(15)
-0.7(13)
-3.9(12)
2.5(12)
C8
17.7(14)
23.3(15)
22.2(14)
-1.0(12)
-1.3(11)
-2.1(11)
C9
21.0(15)
20.2(14)
25.6(15)
-4.1(12)
0.8(12)
-4.3(11)
C10
23.7(15)
26.9(16)
23.5(15)
-3.7(13)
-0.2(12)
-5.4(12)
C11
19.9(15)
30.3(16)
23.3(15)
0.8(13)
1.7(12)
-6.6(12)
C12
23.1(16)
24.5(15)
31.9(17)
-1.1(13)
1.0(13)
-8.3(12)
C13
24.7(16)
28.5(16)
24.6(15)
-8.1(13)
0.8(12)
-6.1(13)
C14
23.8(15)
21.3(14)
23.2(15)
-3.7(12)
-0.5(12)
-2.7(12)
C15
33.5(18)
31.9(18)
25.3(16)
1.5(14)
1.8(14)
4.6(14)
C16
41(2)
35.9(19)
27.3(17)
-2.3(15)
7.2(15)
3.9(16)
C17
30.4(18)
27.7(17)
35.4(18)
-7.7(14)
6.1(14)
2.4(14)
C18
27.2(17)
33.3(18)
32.9(18)
-4.0(15)
-4.9(14)
5.6(14)
C19
26.4(17)
36.1(18)
22.7(15)
-4.0(14)
-3.3(13)
0.0(14)
P1
18.8(4)
23.6(4)
19.7(4)
-1.8(3)
-2.1(3)
-1.5(3)
C21
80(3)
25.0(18)
51(2)
-8.4(18)
26(2)
-19(2)
C22
40(2)
28.1(18)
37.0(19)
12.3(15)
14.6(16)
2.5(15)
C23
33.5(19)
31.4(18)
42(2)
8.6(16)
3.8(16)
-7.6(15)
C24
50(2)
45(2)
43(2)
18.6(19)
-2.0(18)
-19.1(19)
C25
41(2)
90(4)
51(3)
39(3)
-8(2)
-18(2)
C26
39(3)
84(4)
55(3)
25(3)
10(2)
13(2)
C27
45(2)
62(3)
38(2)
16(2)
7.5(18)
9(2)
C28
40(2)
24.6(16)
31.7(18)
-2.4(14)
12.0(15)
-10.0(14)
C29
31.0(18)
32.4(18)
36.2(19)
1.2(15)
7.3(15)
-5.5(14)
C30
34(2)
40(2)
41(2)
8.8(17)
11.9(16)
-7.5(16)
C31
45(2)
44(2)
39(2)
0.2(18)
7.4(17)
-9.7(18)
C32
55(3)
46(2)
37(2)
-4.8(18)
-0.9(18)
-24.7(19)
C33
49(2)
36(2)
41(2)
-10.3(17)
10.9(17)
-21.9(17)
C34
35.8(19)
30.4(17)
30.6(17)
-6.9(14)
8.1(14)
-13.8(15)
C35
38(2)
50(2)
31.4(19)
4.8(17)
3.7(15)
-14.7(17)
C36
36(2)
77(3)
30.3(19)
9(2)
8.1(16)
-11(2)
C37
34(2)
66(3)
34(2)
-11.5(19)
4.0(16)
-6.8(19)
C38
35(2)
39(2)
53(2)
-7.0(18)
2.4(17)
-7.9(16)
C39
40(2)
33.1(19)
40(2)
-0.2(16)
10.3(16)
-13.0(16)
P21
42.3(5)
22.6(4)
32.7(5)
-1.0(4)
12.9(4)
-8.4(4)
B21
14.5(15)
23.9(16)
25.7(17)
-0.1(14)
-1.2(12)
-5.2(13)
O21
20.8(11)
34.5(13)
37.8(13)
-12.3(10)
-1.8(10)
-8.3(10)
O22
15.7(10)
25.2(11)
32.0(12)
-5.0(9)
0.5(9)
-5.8(8)
O23
16.0(10)
29.3(12)
35.2(13)
-7.5(10)
0.2(9)
-3.8(9)
B31
19.3(17)
26.2(18)
29.2(18)
-3.6(15)
0.8(14)
-5.5(13)
O31
20.7(11)
27.0(12)
31.7(12)
-8.8(10)
-0.8(9)
-3.3(9)
O32
17.5(11)
29.0(12)
44.3(14)
-11.8(10)
1.0(10)
-3.7(9)
O33
17.3(11)
38.0(13)
48.8(15)
-21.2(11)
-0.5(10)
-5.4(10)
O42
16(2)
51(3)
63(5)
-36(3)
4(3)
-3(2)
O41
16(2)
51(3)
63(5)
-36(3)
4(3)
-3(2)
O43
16(2)
51(3)
63(5)
-36(3)
4(3)
-3(2)
O44
16(2)
51(3)
63(5)
-36(3)
4(3)
-3(2)

Table S3: Bond Lengths in Å for 2009src0115.

Atom
Atom
Length/Å
B1
O1
1.473(4)

B1
O3
1.435(4)

B1
O4
1.466(4)

B1
O6
1.471(4)

B2
O1
1.335(4)

B2
O2
1.369(4)

B2
O7
1.360(4)

B3
O2
1.395(4)

B3
O3
1.334(4)

B3
O8
1.342(4)

B4
O4
1.350(4)

B4
O5
1.387(4)

B4
O9
1.359(4)

B5
O5
1.378(4)

B5
O6
1.353(4)

B5
O10
1.353(4)

B11
O11
1.463(4)

B11
O13
1.481(4)

B11
O14
1.472(4)

B11
O16
1.434(4)

B12
O11
1.351(4)

B12
O12
1.393(4)

B12
O17
1.350(4)

B13
O12
1.378(4)

B13
O13
1.351(4)

B13
O18
1.361(4)

B14
O14
1.346(4)

B14
O15
1.361(4)

B14
O19
1.354(4)

B15
O15
1.381(4)

B15
O16
1.337(4)

B15
O20
1.346(4)

C1
P1
1.785(3)

C2
C3
1.379(4)

C2
C7
1.375(4)

C2
P1
1.785(3)

C3
C4
1.380(5)

C4
C5
1.368(5)

C5
C6
1.359(5)

C6
C7
1.392(5)

C8
C9
1.395(4)

C8
C13
1.396(4)

C8
P1
1.784(3)

C9
C10
1.383(4)

C10
C11
1.386(4)

C11
C12
1.382(4)

C12
C13
1.386(4)

C14
C15
1.386(4)

C14
C19
1.378(4)

C14
P1
1.760(3)

C15
C16
1.367(5)

C16
C17
1.378(5)

C17
C18
1.357(5)

C18
C19
1.365(4)

C21
P21
1.784(4)

C22
C23
1.399(5)

C22
C27
1.382(5)

C22
P21
1.774(5)

C23
C24
1.376(6)

C24
C25
1.368(6)

C25
C26
1.385(8)

C26
C27
1.377(7)

C28
C29
1.386(5)

C28
C33
1.378(5)

C28
P21
1.780(3)

C29
C30
1.379(5)

C30
C31
1.373(6)

C31
C32
1.375(5)

C32
C33
1.381(5)

C34
C35
1.387(5)

C34
C39
1.387(5)

C34
P21
1.757(4)

C35
C36
1.355(5)

C36
C37
1.374(6)

C37
C38
1.373(5)

C38
C39
1.369(5)

B21
O21
1.373(4)

B21
O22
1.344(4)

B21
O23
1.347(4)

B31
O31
1.382(4)

B31
O32
1.354(4)

B31
O33
1.339(4)


Table S4: Bond Angles in ° for 2009src0115.

Atom
Atom
Atom
Angle/°
O3
B1
O1
110.9(2)

O3
B1
O4
110.7(2)

O3
B1
O6
109.2(2)

O4
B1
O1
107.8(2)

O4
B1
O6
110.7(2)

O6
B1
O1
107.5(2)

O1
B2
O2
122.7(3)

O1
B2
O7
121.3(3)

O7
B2
O2
116.0(3)

O3
B3
O2
122.1(3)

O3
B3
O8
120.3(3)

O8
B3
O2
117.6(3)

O4
B4
O5
121.7(3)

O4
B4
O9
122.6(3)

O9
B4
O5
115.8(3)

O6
B5
O5
120.6(3)

O6
B5
O10
121.5(3)

O10
B5
O5
117.9(3)

B2
O1
B1
123.2(2)

B2
O2
B3
116.7(2)

B3
O3
B1
124.1(2)

B4
O4
B1
122.3(2)

B5
O5
B4
119.0(3)

B5
O6
B1
123.1(2)

O11
B11
O13
110.4(2)

O11
B11
O14
108.2(2)

O14
B11
O13
107.7(2)

O16
B11
O11
110.8(2)

O16
B11
O13
109.0(2)

O16
B11
O14
110.7(2)

O11
B12
O12
121.1(3)

O17
B12
O11
123.2(3)

O17
B12
O12
115.7(3)

O13
B13
O12
121.0(3)

O13
B13
O18
122.9(3)

O18
B13
O12
116.1(3)

O14
B14
O15
122.1(3)

O14
B14
O19
118.8(3)

O19
B14
O15
119.1(3)

O16
B15
O15
121.9(3)

O16
B15
O20
123.7(3)

O20
B15
O15
114.3(3)

B12
O11
B11
122.3(2)

B13
O12
B12
119.0(2)

B13
O13
B11
121.6(2)

B14
O14
B11
123.1(2)

B14
O15
B15
117.8(2)

B15
O16
B11
124.2(2)

C3
C2
P1
119.6(2)

C7
C2
C3
119.4(3)

C7
C2
P1
120.8(2)

C2
C3
C4
119.9(3)

C5
C4
C3
120.4(3)

C6
C5
C4
120.1(3)

C5
C6
C7
120.0(3)

C2
C7
C6
120.0(3)

C9
C8
C13
120.3(3)

C9
C8
P1
120.8(2)

C13
C8
P1
118.8(2)

C10
C9
C8
119.8(3)

C9
C10
C11
119.8(3)

C12
C11
C10
120.6(3)

C11
C12
C13
120.3(3)

C12
C13
C8
119.2(3)

C15
C14
P1
119.0(2)

C19
C14
C15
120.1(3)

C19
C14
P1
120.9(2)

C16
C15
C14
119.5(3)

C15
C16
C17
119.6(3)

C18
C17
C16
120.9(3)

C17
C18
C19
120.1(3)

C18
C19
C14
119.8(3)

C2
P1
C1
110.34(15)

C8
P1
C1
110.33(15)

C8
P1
C2
107.74(14)

C14
P1
C1
109.16(16)

C14
P1
C2
110.16(14)

C14
P1
C8
109.09(14)

C23
C22
P21
121.0(3)

C27
C22
C23
118.7(4)

C27
C22
P21
120.3(3)

C24
C23
C22
121.5(4)

C25
C24
C23
119.3(5)

C24
C25
C26
119.5(5)

C27
C26
C25
121.8(4)

C26
C27
C22
119.1(5)

C29
C28
P21
120.3(3)

C33
C28
C29
121.0(3)

C33
C28
P21
118.5(3)

C30
C29
C28
118.4(4)

C31
C30
C29
120.8(4)

C30
C31
C32
120.7(4)

C31
C32
C33
119.3(4)

C28
C33
C32
119.8(4)

C35
C34
C39
120.3(3)

C35
C34
P21
118.6(3)

C39
C34
P21
120.6(3)

C36
C35
C34
119.0(4)

C35
C36
C37
120.8(4)

C38
C37
C36
120.7(4)

C39
C38
C37
119.2(4)

C38
C39
C34
120.0(3)

C22
P21
C21
110.8(2)

C22
P21
C28
110.34(17)

C28
P21
C21
108.37(18)

C34
P21
C21
110.39(19)

C34
P21
C22
106.82(17)

C34
P21
C28
110.10(17)

O22
B21
O21
124.7(3)

O22
B21
O23
119.7(3)

O23
B21
O21
115.6(3)

O32
B31
O31
122.6(3)

O33
B31
O31
121.0(3)

O33
B31
O32
116.4(3)


Table S5: Torsion Angles in ° for 2009src0115.

Atom
Atom
Atom
Atom
Angle/°

O1
B1
O3
B3
-3.3(4)
O1
B1
O4
B4
100.5(3)
O1
B1
O6
B5
-99.0(3)
O1
B2
O2
B3
4.2(4)
O2
B2
O1
B1
-2.4(4)
O2
B3
O3
B1
5.7(4)
O3
B1
O1
B2
1.7(4)
O3
B1
O4
B4
-138.0(3)
O3
B1
O6
B5
140.6(3)
O3
B3
O2
B2
-5.7(4)
O4
B1
O1
B2
123.1(3)
O4
B1
O3
B3
-123.0(3)
O4
B1
O6
B5
18.5(4)
O4
B4
O5
B5
-0.6(5)
O5
B4
O4
B1
9.0(4)
O5
B5
O6
B1
-12.2(5)
O6
B1
O1
B2
-117.6(3)
O6
B1
O3
B3
114.9(3)
O6
B1
O4
B4
-16.8(4)
O6
B5
O5
B4
2.1(5)
O7
B2
O1
B1
178.6(3)
O7
B2
O2
B3
-176.8(2)
O8
B3
O2
B2
175.2(3)
O8
B3
O3
B1
-175.3(3)
O9
B4
O4
B1
-171.0(3)
O9
B4
O5
B5
179.4(3)
O10
B5
O5
B4
-178.5(3)
O10
B5
O6
B1
168.5(3)
O11
B11
O13
B13
-25.2(4)
O11
B11
O14
B14
-125.0(3)
O11
B11
O16
B15
124.3(3)
O11
B12
O12
B13
-7.1(4)
O12
B12
O11
B11
-5.6(4)
O12
B13
O13
B11
15.1(4)
O13
B11
O11
B12
20.4(4)
O13
B11
O14
B14
115.8(3)
O13
B11
O16
B15
-114.1(3)
O13
B13
O12
B12
2.3(4)
O14
B11
O11
B12
-97.1(3)
O14
B11
O13
B13
92.7(3)
O14
B11
O16
B15
4.2(4)
O14
B14
O15
B15
-3.3(4)
O15
B14
O14
B11
3.2(4)
O15
B15
O16
B11
-4.9(5)
O16
B11
O11
B12
141.3(3)
O16
B11
O13
B13
-147.1(3)
O16
B11
O14
B14
-3.3(4)
O16
B15
O15
B14
4.1(4)
O17
B12
O11
B11
174.8(3)
O17
B12
O12
B13
172.5(3)
O18
B13
O12
B12
-176.8(3)
O18
B13
O13
B11
-165.8(3)
O19
B14
O14
B11
-176.0(2)
O19
B14
O15
B15
175.8(3)
O20
B15
O15
B14
-175.6(3)
O20
B15
O16
B11
174.8(3)
C2
C3
C4
C5
-0.2(5)
C3
C2
C7
C6
1.3(5)
C3
C2
P1
C1
50.2(3)
C3
C2
P1
C8
-70.3(3)
C3
C2
P1
C14
170.8(2)
C3
C4
C5
C6
1.4(5)
C4
C5
C6
C7
-1.2(5)
C5
C6
C7
C2
-0.1(5)
C7
C2
C3
C4
-1.1(5)
C7
C2
P1
C1
-134.7(3)
C7
C2
P1
C8
104.8(3)
C7
C2
P1
C14
-14.1(3)
C8
C9
C10
C11
0.7(5)
C9
C8
C13
C12
-1.0(5)
C9
C8
P1
C1
-127.6(3)
C9
C8
P1
C2
-7.0(3)
C9
C8
P1
C14
112.5(3)
C9
C10
C11
C12
-1.1(5)
C10
C11
C12
C13
0.4(5)
C11
C12
C13
C8
0.6(5)
C13
C8
C9
C10
0.3(4)
C13
C8
P1
C1
55.4(3)
C13
C8
P1
C2
175.9(2)
C13
C8
P1
C14
-64.5(3)
C14
C15
C16
C17
-1.0(6)
C15
C14
C19
C18
0.0(5)
C15
C14
P1
C1
40.7(3)
C15
C14
P1
C2
-80.6(3)
C15
C14
P1
C8
161.3(3)
C15
C16
C17
C18
1.1(6)
C16
C17
C18
C19
-0.6(6)
C17
C18
C19
C14
0.1(5)
C19
C14
C15
C16
0.5(5)
C19
C14
P1
C1
-141.6(3)
C19
C14
P1
C2
97.1(3)
C19
C14
P1
C8
-21.0(3)
P1
C2
C3
C4
174.1(2)
P1
C2
C7
C6
-173.9(2)
P1
C8
C9
C10
-176.7(2)
P1
C8
C13
C12
176.1(2)
P1
C14
C15
C16
178.2(3)
P1
C14
C19
C18
-177.7(3)
C22
C23
C24
C25
-0.3(5)
C23
C22
C27
C26
0.2(6)
C23
C22
P21
C21
131.4(3)
C23
C22
P21
C28
-108.5(3)
C23
C22
P21
C34
11.2(3)
C23
C24
C25
C26
0.3(6)
C24
C25
C26
C27
0.0(7)
C25
C26
C27
C22
-0.2(7)
C27
C22
C23
C24
0.1(5)
C27
C22
P21
C21
-48.1(3)
C27
C22
P21
C28
71.9(3)
C27
C22
P21
C34
-168.4(3)
C28
C29
C30
C31
-0.1(6)
C29
C28
C33
C32
0.9(6)
C29
C28
P21
C21
113.0(3)
C29
C28
P21
C22
-8.5(3)
C29
C28
P21
C34
-126.2(3)
C29
C30
C31
C32
-1.0(6)
C30
C31
C32
C33
2.1(6)
C31
C32
C33
C28
-2.0(6)
C33
C28
C29
C30
0.2(5)
C33
C28
P21
C21
-62.5(4)
C33
C28
P21
C22
176.0(3)
C33
C28
P21
C34
58.3(3)
C34
C35
C36
C37
0.3(6)
C35
C34
C39
C38
-0.3(6)
C35
C34
P21
C21
-38.8(4)
C35
C34
P21
C22
81.8(3)
C35
C34
P21
C28
-158.4(3)
C35
C36
C37
C38
-1.0(7)
C36
C37
C38
C39
1.0(6)
C37
C38
C39
C34
-0.4(6)
C39
C34
C35
C36
0.3(6)
C39
C34
P21
C21
148.8(3)
C39
C34
P21
C22
-90.6(3)
C39
C34
P21
C28
29.2(4)
P21
C22
C23
C24
-179.5(3)
P21
C22
C27
C26
179.7(3)
P21
C28
C29
C30
-175.2(3)
P21
C28
C33
C32
176.4(3)
P21
C34
C35
C36
-172.1(3)
P21
C34
C39
C38
172.0(3)

Table S6: Hydrogen Fractional Atomic Coordinates (×104) and Equivalent Isotropic Displacement Parameters (Å2×103) for 2009src0115. Ueq is defined as 1/3 of the trace of the orthogonalised Uij.

Atom
x
y
z
Ueq
H7A
-1112.79
11488.25
2298.23
36
H8
4210.07
10248.46
1594.89
40
H9A
-519.68
6680.75
2207.91
42
H10A
-995.22
9584.16
-229.1
48
H17A
11015.91
7783.89
2567.19
46
H18A
11038.96
5333.93
5175.51
37
H19A
10329.56
2504.16
2663.73
35
H20
5927.23
5261.56
3587.34
58
H1A
1607.21
10335.29
3178.91
47
H1B
564.2
10276.11
3825.33
47
H1C
1422.76
9211.34
3515.84
47
H3
912.79
11807.62
4426.29
33
H4
1127.52
13472.16
4650.41
39
H5
3263.55
13865.04
4561.05
37
H6
5189.11
12629.59
4207.04
34
H7
4995
10951.94
3974.35
31
H9
2618.47
10498.5
5409.75
27
H10
2239.35
9647.88
6443.73
30
H11
1861.75
7939.11
6533.67
30
H12
1788.54
7094.92
5600.74
32
H13
2124.09
7945.34
4560.62
31
H15
3978.18
9751.42
2789.24
39
H16
6035.52
8814.98
2290.61
45
H17
7612.26
7721.59
2929.65
40
H18
7125.68
7511.46
4047.86
39
H19
5067.96
8419.55
4553.05
35
H21A
6268.64
8717.24
252.33
80
H21B
4634.7
9019.69
284.09
80
H21C
5544.1
8948.8
-410.21
80
H23
5380.05
5921.94
-946.22
44
H24
3722.1
5696.06
-1567.88
55
H25
1512.42
6731.37
-1410.19
76
H26
992.51
7989.81
-637.82
80
H27
2639.4
8238.01
-16.22
65
H29
3294.75
6468.29
798.22
42
H30
2871.45
5959.01
1907.84
49
H31
4438.54
5985.48
2629.34
53
H32
6494.95
6460.3
2254.41
53
H33
6909.33
7023.15
1151.83
49
H35
7342.66
7745.04
-995.34
49
H36
9257.81
6748
-1551.97
60
H37
10078.4
4993.24
-1215.88
55
H38
9027.03
4217.89
-292.32
51
H39
7092.72
5205.8
276.42
46
H21
12624.43
2909.15
2655.25
45
H22
12360.03
4399.29
3095.89
36
H23A
15555.99
3850.15
2977.92
40
H31A
16409.22
2114.66
2474.72
40
H32A
14678.06
1739.48
2124.35
45
H33A
18058.15
188.11
1681.92
51
H42A
5708.8
3932.47
5535.41
64
H42B
5778.84
4594.33
4976.19
64
H41A
4541.8
6008.2
5266.78
64
H41B
4969.58
4931.09
5232.7
64
H43A
4175.24
5569.79
3979.9
64
H43B
4223.46
6620.77
3926.08
64
H44A
4825.93
6021.65
4218.28
64
H44B
3863.36
5914.3
3828.7
64

Table S7: Hydrogen Bond information for 2009src0115.

D 
H 
A 
d(D-H)/Å 
d(H-A)/Å 
d(D-A)/Å 
D-H-A/deg 
O7
H7A
O311
0.84
1.88
2.714(3)
174.2
O8
H8
O322
0.84
1.93
2.748(3)
164.7
O9
H9A
O113
0.84
1.99
2.828(3)
172.3
O10
H10A
O64
0.84
1.97
2.803(3)
174.1
O17
H17A
O45
0.84
1.95
2.779(3)
171.8
O18
H18A
O136
0.84
1.93
2.764(3)
174.0
O19
H19A
O77
0.84
1.85
2.673(3)
166.7
O20
H20
O428
0.84
2.39
3.057(9)
136.7
O20
H20
O43
0.84
1.88
2.676(5)
158.2
O20
H20
O44
0.84
1.83
2.622(5)
157.5
O21
H21
O19
0.84
1.85
2.676(3)
166.5
O22
H22
O14
0.84
1.86
2.695(3)
171.4
O23
H23A
O205
0.84
1.88
2.710(3)
168.7
O31
H31A
O23
0.84
1.87
2.699(3)
170.2
O32
H32A
O21
0.84
1.84
2.671(3)
169.4
O33
H33A
O19
0.84
1.86
2.696(3)
173.2
–––– 
1-2+x,1+y,+z; 2-1+x,1+y,+z; 3-1+x,+y,+z; 4-x,2-y,-z; 51+x,+y,+z; 62-x,1-y,1-z; 71+x,-1+y,+z; 81-x,1-y,1-z; 92+x,-1+y,+z

Table S8: Atomic Occupancies for all atoms that are not fully occupied in 2009src0115.

Atom
Occupancy
O42
0.217(3)
H42A
0.217(3)
H42B
0.217(3)
O41
0.158(3)
H41A
0.158(3)
H41B
0.158(3)
O43
0.281(3)
H43A
0.281(3)
H43B
0.281(3)
O44
0.344(3)
H44A
0.344(3)
H44B
0.344(3)
Citations for 1
COLLECT (Hooft, R.W.W., 1998)
DENZO (Otwinowski & Minor, 1997)
O.V. Dolomanov and L.J. Bourhis and R.J. Gildea and J.A.K. Howard and H. Puschmann, Olex2: A complete structure solution, refinement and analysis program, J. Appl. Cryst., (2009), 42, 339-341.
Sheldrick, G.M., A short history of ShelX, Acta Cryst., (2008), A64, 339-341.
Sheldrick, G.M., Crystal structure refinement with ShelXL, Acta Cryst., (2015), C71, 3-8.


A blue and black rectangle

Description automatically generated2010src0454b
[MePPh3][B5O6(OH)4].B(OH)3.0.5H2O  Compound 2
Submitted by: 	Mike A Beckett
		Bangor University
Solved by: 	Peter N Horton
Sample ID: 	MAB/JT/33
R1=5.63%

Crystal Data and Experimental
A close-up of a molecule

Description automatically generated
Experimental. Single colourless block-shaped crystals of 2010src0454b (2) were used as supplied. A suitable crystal with dimensions 0.260 × 0.180 × 0.120 mm3 was selected and mounted on a Damien diffractometer. The crystal was kept at a steady T = 120(2) K during data collection. The structure was solved with the ShelXS-97 (Sheldrick, 2008) solution program using direct methods and by using Olex2 1.5-alpha (Dolomanov et al., 2009) as the graphical interface. The model was refined with ShelXL 2018/3 (Sheldrick, 2015) using full matrix least squares minimisation on F2.
Crystal Data. C21H33B5O13.5P, Mr = 586.49, triclinic, P-1 (No. 2), a = 9.1810(3) Å, b = 13.4812(5) Å, c = 23.8357(8) Å, a = 75.3130(10)°, b = 83.095(2)°, g = 86.919(2)°, V = 2832.24(17) Å3, T = 120(2) K, Z = 4, Z' = 2, m(MoKa) = 0.162 mm-1, 50870 reflections measured, 12947 unique (Rint = 0.0578) which were used in all calculations. The final wR2 was 0.1571 (all data) and R1 was 0.0563 (I≥2 s(I)).
Compound 2
2010src0454b 
 
 
Formula 
C21H33B5O13.5P 
Dcalc./ g cm-3 
1.375 
m/mm-1 
0.162 
Formula Weight 
586.49 
Colour 
colourless 
Shape 
block-shaped 
Size/mm3 
0.260×0.180×0.120 
T/K 
120(2) 
Crystal System 
triclinic 
Space Group 
P-1 
a/Å 
9.1810(3) 
b/Å 
13.4812(5) 
c/Å 
23.8357(8) 
a/° 
75.3130(10) 
b/° 
83.095(2) 
g/° 
86.919(2) 
V/Å3 
2832.24(17) 
Z 
4 
Z' 
2 
Wavelength/Å 
0.71073 
Radiation type 
MoKa 
Qmin/° 
2.941 
Qmax/° 
27.605 
Measured Refl's. 
50870 
Indep't Refl's 
12947 
Refl's I≥2 s(I) 
9308 
Rint 
0.0578 
Parameters 
763 
Restraints 
1 
Largest Peak 
0.940 
Deepest Hole 
-0.540 
GooF 
1.038 
wR2 (all data) 
0.1571 
wR2 
0.1416 
R1 (all data) 
0.0831 
R1 
0.0563 
Structure Quality Indicators
Reflections:

Refinement:

A colourless block-shaped-shaped crystal with dimensions 0.260 × 0.180 × 0.120 mm3 was mounted. Data were collected using a Damien diffractometer equipped with an Oxford Cryosystems low-temperature device operating at T = 120(2) K.
Data were measured using f & w scans with MoKa radiation. The diffraction pattern was indexed and the total number of runs and images was based on the strategy calculation from the program COLLECT (Hooft, R.W.W., 1998). The maximum resolution that was achieved was Q = 27.605° (0.77 Å).
The unit cell was refined using DENZO (Otwinowski & Minor, 1997) & COLLECT (Hooft, R.W.W., 1998) on 12555 reflections, 25% of the observed reflections.
Data reduction, scaling and absorption corrections were performed using DENZO (Otwinowski & Minor, 1997) & COLLECT (Hooft, R.W.W., 1998). The final completeness is 99.70 % out to 27.605° in Q. SADABS 2007/2 (Sheldrick, G.M., 2007).  The absorption coefficient m of this material is 0.162 mm-1 at this wavelength (l = 0.71073Å) and the minimum and maximum transmissions are 0.959 and 0.981.
The structure was solved and the space group P-1 (# 2) determined by the ShelXS-97 (Sheldrick, 2008) structure solution program using using direct methods and refined by full matrix least squares minimisation on F2 using version 2018/3 of ShelXL 2018/3 (Sheldrick, 2015). All non-hydrogen atoms were refined anisotropically. Hydrogen atom positions were calculated geometrically and refined using the riding model. Hydrogen atom positions were calculated geometrically and refined using the riding model.
_refine_special_details: There is a pseudo body-centring, but multiple reflections are observed which should be absent if it truly existed
_exptl_absorpt_process_details: SADABS 2007/2 (Sheldrick, G.M., 2007)
The value of Z' is 2. This means that there are two independent molecules in the asymmetric unit. The moiety formula is B5 H4 O10, C21 H22 P, 3.5(H2 O).
A structure of a molecule

Description automatically generated
Figure S5 The following hydrogen bonding interactions with a maximum D-D distance of 2.9 Å and a minimum angle of 120 ° are present in 2010src0454b: O7–O62_4: 2.695 Å, O8–O20_5: 2.685 Å, O9–O63_6: 2.874 Å, O10–O7_1: 2.734 Å, O17–O61: 2.871 Å, O18–O19_1: 2.703 Å, O20–O66_5: 2.703 Å, O61–O12: 2.878 Å, O61–O1_6: 2.711 Å, O62–O11: 2.788 Å, O62–O61_2: 2.84 Å, O63–O14: 2.698 Å, O63–O5_6: 2.887 Å, O64–O18_3: 2.936 Å, O64–O8: 2.829 Å, O65–O3: 2.797 Å, O65–O64: 2.714 Å, O66–O10_2: 3.069 Å, O66–O65_2: 2.679 Å, O67–O4: 2.777 Å, O67–O63_4: 2.856 Å, O19–O67_4: 2.699 Å.

A computer generated image of a molecule

Description automatically generated
Figure S6 The p-p interactions of 2010src0454b. Plane 1 to #1@2_575 (-X,2-Y,-Z): The angle between these two planes is 0.000 °, the Centroid-Centroid distance is 3.748 Å and the Shift Distance is 0.917 Å Plane 5 to #5@2_666 (1-X,1-Y,1-Z): The angle between these two planes is 0.000 °, the Centroid-Centroid distance is 3.712 Å and the Shift Distance is 1.155 Å

A diagram of a molecule

Description automatically generated
Figure S7 Packing diagram of 2010src0454b viewed along the a axis

A screenshot of a computer screen

Description automatically generated
Figure S8 Packing diagram of 2010src0454b viewed along the b axis

A close up of a structure

Description automatically generated
Figure S9 Packing diagram of 2010src0454b viewed along the c axis

Table S9: Fractional Atomic Coordinates (×104) and Equivalent Isotropic Displacement Parameters (Å2×103) for 2010src0454b. Ueq is defined as 1/3 of the trace of the orthogonalised Uij.

Atom
x
y
z
Ueq
B1
-21(2)
4492(2)
2582.9(11)
23.8(5)
B2
2426(2)
4321(2)
2949.3(10)
21.7(5)
B3
1534(3)
5989(2)
2490.3(12)
25.9(5)
B4
-1784(2)
3819.3(18)
2059.7(10)
19.6(5)
B5
-2637(2)
4251(2)
2961.8(11)
23.9(5)
O1
1240.3(15)
3881.2(12)
2833.4(7)
23.9(3)
O2
2557.8(15)
5367.7(12)
2820.4(7)
25.8(3)
O3
373.4(15)
5565.8(12)
2342.6(7)
27.8(4)
O4
-398.4(14)
4054.7(11)
2109.3(6)
22.3(3)
O5
-2940.2(14)
3939.2(11)
2474.6(6)
21.7(3)
O6
-1259.7(15)
4434.7(13)
3039.1(7)
29.4(4)
O7
3565.5(15)
3738.7(12)
3196.1(7)
25.0(3)
O8
1675.3(17)
7017.6(12)
2314.1(8)
36.5(4)
O9
-2078.8(15)
3462.9(13)
1599.6(7)
27.1(4)
O10
-3780.5(16)
4385.0(15)
3359.7(7)
37.8(4)
B11
4574(2)
9493.9(19)
-2432.6(11)
21.8(5)
B12
2838(2)
8806.6(18)
-2960.6(10)
18.8(5)
B13
1984(2)
9160(2)
-2037.7(11)
23.9(5)
B14
7063(2)
9341(2)
-2098.9(10)
21.8(5)
B15
6112(3)
10990(2)
-2543.3(11)
24.2(5)
O11
4214.9(14)
9069.7(11)
-2916.5(6)
20.8(3)
O12
1687.9(14)
8877.8(11)
-2535.6(6)
21.9(3)
O13
3361.2(15)
9369.1(12)
-1965.5(6)
26.0(3)
O14
5865.8(15)
8889.4(11)
-2199.0(7)
23.6(3)
O15
7195.4(15)
10386.4(12)
-2245.8(7)
27.9(4)
O16
4913.3(15)
10573.5(11)
-2657.7(7)
26.5(3)
O17
2550.5(15)
8466.4(13)
-3427.9(7)
26.4(3)
O18
857.6(16)
9241.4(16)
-1625.9(8)
39.5(5)
O19
8208.0(15)
8757.3(12)
-1853.4(7)
27.1(4)
O20
6348.2(17)
12022.4(12)
-2719.1(8)
33.1(4)
C1
2430(2)
8949.3(16)
33.4(9)
20.5(4)
C2
2460(2)
9610.3(17)
-522.9(10)
27.9(5)
C3
2076(3)
10637.2(18)
-576.4(12)
35.5(6)
C4
1686(2)
10997.6(19)
-84.0(13)
35.5(6)
C5
1643(3)
10344(2)
460.8(13)
39.6(6)
C6
2004(3)
9312.9(18)
526.7(11)
32.3(5)
C7
1105(2)
6946.0(15)
226.1(9)
19.8(4)
C8
481(2)
6762.0(17)
-245.9(10)
23.7(5)
C9
-896(2)
6327.8(18)
-149.7(11)
29.2(5)
C10
-1636(2)
6079.3(17)
407.6(11)
29.6(5)
C11
-1019(2)
6258.8(18)
875.1(11)
29.9(5)
C12
352(2)
6695.1(17)
786.8(10)
25.3(5)
C13
3772(2)
7099.3(16)
745.2(9)
20.9(4)
C14
4656(2)
7726.6(18)
939.9(10)
27.6(5)
C15
5416(2)
7315(2)
1418.6(11)
33.3(6)
C16
5322(2)
6280(2)
1697.5(10)
31.6(5)
C17
4480(2)
5651.7(19)
1496.0(10)
29.1(5)
C18
3692(2)
6052.4(17)
1025.8(9)
24.2(5)
C19
3962(2)
7398.8(16)
-525.7(9)
22.0(4)
C20
4270(2)
6249.4(17)
-466.8(10)
27.7(5)
C21
5404(2)
7973.6(19)
-610.5(11)
31.1(5)
P1
2813.8(5)
7602.6(4)
115.7(2)
17.53(13)
C31
1041(2)
7861.8(17)
4213.1(9)
21.6(4)
C32
1085(2)
8895.6(18)
3916.6(10)
27.3(5)
C33
281(3)
9259(2)
3445.4(11)
35.0(6)
C34
-556(3)
8592(2)
3267.2(10)
37.3(6)
C35
-616(3)
7570(2)
3562.5(11)
34.4(6)
C36
170(2)
7202.9(19)
4037.7(10)
28.4(5)
C37
2498(2)
6061.1(16)
4905.0(9)
20.4(4)
C38
2544(2)
5384.6(17)
5453.6(10)
26.7(5)
C39
3044(3)
4385.5(18)
5492.2(12)
33.5(6)
C40
3482(2)
4057.1(18)
4992.2(12)
33.9(6)
C41
3438(2)
4723.8(19)
4448.6(12)
34.0(6)
C42
2962(2)
5731.0(17)
4399.0(10)
26.8(5)
C43
3701(2)
8076.6(15)
4739.0(9)
19.6(4)
C44
4297(2)
8271.8(16)
5215.3(10)
23.3(5)
C45
5664(2)
8715.3(17)
5126.3(10)
27.8(5)
C46
6432(2)
8962.6(18)
4574.6(11)
30.2(5)
C47
5846(2)
8768.2(18)
4103.4(10)
28.4(5)
C48
4482(2)
8321.9(16)
4184.5(9)
23.5(5)
C49
865(2)
7563.2(16)
5486.8(9)
21.8(4)
C50
-542(2)
6950.1(19)
5577.5(10)
31.0(5)
C51
494(2)
8705.9(18)
5428.7(10)
28.5(5)
P31
2023.8(5)
7391.3(4)
4840.3(2)
17.59(13)
O61
-517.3(16)
8117.1(12)
-3070.2(7)
27.2(3)
O62
6688.2(16)
8316.1(13)
-3490.9(7)
28.3(4)
O63
5140.9(16)
6902.2(12)
-1970.7(7)
24.4(3)
O64
-252(3)
8557.0(18)
1750.5(10)
62.1(6)
O65
-2000(2)
6962.5(17)
2305.4(11)
56.4(6)
O66
5825(2)
6715.0(15)
3181.5(9)
47.5(5)
O67
2061.9(16)
3299.2(13)
1537.7(7)
27.9(4)

Table S10: Anisotropic Displacement Parameters (×104) for 2010src0454b. The anisotropic displacement factor exponent takes the form: -2p2[h2a*2 × U11+ ... +2hka* × b* × U12]

Atom
U11
U22
U33
U23
U13
U12
B1
11.9(10)
33.9(14)
28.1(14)
-12.1(11)
-1.6(9)
-2.7(9)
B2
14.1(10)
34.3(14)
17.7(12)
-9.1(10)
2.2(9)
-5.6(9)
B3
15.3(11)
32.8(15)
32.6(15)
-13.4(12)
-2.8(10)
0.1(10)
B4
15.3(10)
23.6(12)
19.9(12)
-4.7(10)
-2.7(9)
-0.9(9)
B5
13.6(10)
36.4(15)
25.1(13)
-13.1(11)
-2.0(9)
-4.8(9)
O1
13.6(7)
30.3(9)
28.8(9)
-7.5(7)
-4.2(6)
-4.6(6)
O2
15.0(7)
32.0(9)
32.8(9)
-10.4(7)
-4.2(6)
-5.2(6)
O3
15.7(7)
28.4(9)
42.4(10)
-12.6(7)
-7.7(7)
-0.7(6)
O4
12.9(6)
31.4(9)
24.9(8)
-11.2(7)
-1.5(6)
-2.2(6)
O5
12.3(6)
33.0(9)
22.8(8)
-11.6(7)
-2.3(6)
-2.9(6)
O6
13.4(7)
53.1(11)
28.0(9)
-21.2(8)
-1.1(6)
-5.7(7)
O7
14.6(7)
33.1(9)
28.1(9)
-7.7(7)
-4.0(6)
-5.2(6)
O8
22.7(8)
29.4(9)
60.8(12)
-13.8(8)
-11.9(8)
-2.1(7)
O9
16.7(7)
42.0(10)
26.5(9)
-14.9(7)
-3.5(6)
-2.4(7)
O10
15.0(7)
71.9(13)
36.6(10)
-32.2(9)
2.0(7)
-11.6(8)
B11
14.0(10)
28.7(13)
25.2(13)
-10.3(10)
-2.6(9)
-3.0(9)
B12
16.1(10)
20.9(12)
18.9(12)
-4.1(9)
-1.2(8)
-1.5(9)
B13
14.9(10)
33.8(14)
25.8(13)
-11.9(11)
-3.6(9)
-1.2(9)
B14
14.1(10)
33.1(14)
19.8(12)
-9.6(10)
0.6(9)
-4.8(9)
B15
19.3(11)
27.6(14)
27.7(14)
-11.5(11)
1.0(9)
-4.2(9)
O11
12.7(6)
27.1(8)
23.6(8)
-7.7(6)
-2.0(5)
-3.7(6)
O12
12.9(6)
33.4(9)
21.9(8)
-10.4(7)
-2.9(6)
-3.8(6)
O13
14.3(7)
42.7(10)
25.2(8)
-15.1(7)
-2.3(6)
-5.5(6)
O14
14.4(7)
27.1(8)
30.1(9)
-6.4(7)
-6.1(6)
-3.3(6)
O15
17.6(7)
31.7(9)
36.7(10)
-10.6(7)
-4.7(6)
-7.9(6)
O16
19.8(7)
24.9(8)
36.9(9)
-9.0(7)
-7.4(6)
-2.5(6)
O17
15.9(7)
41.3(10)
26.1(8)
-14.9(7)
-2.7(6)
-3.6(6)
O18
15.5(7)
78.2(14)
35.1(10)
-33.1(9)
2.1(7)
-12.3(8)
O19
14.4(7)
36.3(9)
32.5(9)
-9.6(7)
-5.9(6)
-4.7(6)
O20
27.3(8)
28.4(9)
46.6(11)
-12.8(8)
-6.8(8)
-5.1(7)
C1
12.3(9)
22.6(11)
26.7(12)
-6.2(9)
-2.8(8)
0.4(8)
C2
28.1(11)
24.8(12)
32.7(13)
-6.9(10)
-12.5(10)
0.5(9)
C3
33.9(13)
22.3(12)
49.4(16)
0.4(11)
-20.6(12)
-2.0(10)
C4
17.7(10)
23.3(12)
67.1(19)
-13.7(12)
-6.3(11)
2.0(9)
C5
34.8(13)
31.8(14)
52.9(18)
-19.9(13)
12.5(12)
0.0(11)
C6
32.9(12)
29.0(13)
33.5(14)
-11.7(11)
10.9(10)
-0.4(10)
C7
17.7(9)
19.2(11)
22.9(11)
-5.4(8)
-3.6(8)
0.4(8)
C8
21.8(10)
27.0(12)
24.0(12)
-9.5(9)
-3.8(8)
1.1(8)
C9
25.7(11)
30.7(13)
37.1(14)
-15.5(11)
-12.1(10)
0.0(9)
C10
21.2(11)
23.6(12)
43.2(15)
-5.5(10)
-5.5(10)
-4.7(9)
C11
22.1(11)
34.2(13)
29.2(13)
-0.4(10)
0.3(9)
-5.6(9)
C12
21.4(10)
32.2(13)
21.1(11)
-3.8(9)
-2.6(8)
-3.8(9)
C13
17.0(9)
26.2(12)
19.0(11)
-5.8(9)
-0.8(8)
0.8(8)
C14
23.2(11)
31.7(13)
26.9(12)
-3.8(10)
-4.4(9)
-6.3(9)
C15
23.9(11)
49.0(16)
27.7(13)
-7.1(11)
-7.5(9)
-8.4(10)
C16
22.6(11)
46.5(15)
22.6(12)
-1.8(11)
-6.4(9)
3.6(10)
C17
26.5(11)
31.2(13)
26.6(12)
-2.3(10)
-3.8(9)
4.1(9)
C18
23.4(10)
23.9(12)
24.4(12)
-4.0(9)
-3.1(9)
-0.6(8)
C19
20.1(10)
25.4(11)
20.3(11)
-6.0(9)
-1.6(8)
1.1(8)
C20
30.2(11)
26.2(12)
28.6(13)
-11.0(10)
-3.8(9)
5.7(9)
C21
21.3(11)
40.3(14)
30.5(13)
-10.7(11)
7.6(9)
-4.6(10)
P1
15.3(2)
19.1(3)
18.0(3)
-4.5(2)
-1.13(19)
-0.17(19)
C31
16.8(9)
27.5(12)
19.3(11)
-4.3(9)
-1.0(8)
1.7(8)
C32
23.4(11)
29.5(13)
26.8(12)
-3.8(10)
-2.1(9)
2.9(9)
C33
28.7(12)
38.4(15)
28.8(13)
5.1(11)
-1.6(10)
10.0(10)
C34
24.6(11)
62.2(18)
20.7(12)
-2.2(12)
-6.9(9)
9.6(11)
C35
25.4(11)
53.0(17)
26.5(13)
-10.1(12)
-8.1(10)
-4.1(11)
C36
22.5(11)
35.2(13)
26.5(12)
-4.3(10)
-4.7(9)
-3.4(9)
C37
15.4(9)
22.1(11)
24.5(11)
-6.0(9)
-4.0(8)
-0.7(8)
C38
27.6(11)
24.3(12)
30.6(13)
-7.4(10)
-11.0(9)
-1.0(9)
C39
30.5(12)
23.7(12)
46.1(15)
-0.7(11)
-19.5(11)
-2.3(9)
C40
19.8(11)
22.7(12)
63.3(18)
-16.2(12)
-9.6(11)
0.9(9)
C41
21.7(11)
34.3(14)
49.9(16)
-22.1(12)
6.0(10)
-1.4(10)
C42
24.1(11)
28.0(12)
29.1(13)
-10.7(10)
2.7(9)
-2.0(9)
C43
16.5(9)
17.3(10)
24.4(11)
-4.4(8)
-2.5(8)
0.9(8)
C44
22.0(10)
25.4(12)
24.2(12)
-8.8(9)
-3.4(8)
-0.4(8)
C45
24.2(11)
30.7(13)
32.1(13)
-12.1(10)
-8.1(9)
-0.1(9)
C46
20.3(10)
27.5(13)
42.8(15)
-6.7(11)
-6.1(10)
-4.3(9)
C47
20.4(10)
30.9(13)
29.6(13)
-1.2(10)
1.5(9)
-3.5(9)
C48
20.3(10)
27.5(12)
21.8(11)
-5.2(9)
-1.4(8)
-1.3(8)
C49
17.9(9)
26.9(12)
20.9(11)
-8.0(9)
0.4(8)
1.0(8)
C50
22.6(11)
40.7(14)
29.0(13)
-10.1(11)
5.4(9)
-5.6(10)
C51
24.4(11)
33.4(13)
30.2(13)
-14.1(10)
-2.5(9)
5.7(9)
P31
15.1(2)
20.3(3)
17.4(3)
-4.8(2)
-1.97(19)
0.30(19)
O61
22.3(7)
31.6(9)
29.9(9)
-9.3(7)
-5.7(6)
-6.8(7)
O62
18.6(7)
38.0(10)
30.8(9)
-13.3(7)
-3.9(6)
1.9(7)
O63
21.0(7)
25.9(8)
27.5(9)
-6.0(7)
-7.3(6)
-3.8(6)
O64
60.8(14)
69.3(16)
48.3(14)
-3.3(12)
-7.9(11)
17.1(12)
O65
37.5(11)
60.0(14)
80.6(17)
-28.9(13)
-24.4(11)
16.1(9)
O66
57.2(13)
39.2(11)
49.1(13)
-14.2(9)
-15.5(10)
8.3(9)
O67
17.1(7)
39.4(10)
30.5(9)
-14.9(7)
-4.2(6)
3.1(7)

Table S11: Bond Lengths in Å for 2010src0454b.

Atom
Atom
Length/Å
B1
O1
1.480(3)

B1
O3
1.463(3)

B1
O4
1.482(3)

B1
O6
1.467(3)

B2
O1
1.356(3)

B2
O2
1.374(3)

B2
O7
1.372(3)

B3
O2
1.401(3)

B3
O3
1.357(3)

B3
O8
1.352(3)

B4
O4
1.354(3)

B4
O5
1.393(3)

B4
O9
1.364(3)

B5
O5
1.393(3)

B5
O6
1.344(3)

B5
O10
1.364(3)

B11
O11
1.487(3)

B11
O13
1.461(3)

B11
O14
1.485(3)

B11
O16
1.455(3)

B12
O11
1.354(2)

B12
O12
1.390(3)

B12
O17
1.365(3)

B13
O12
1.395(3)

B13
O13
1.350(3)

B13
O18
1.358(3)

B14
O14
1.358(3)

B14
O15
1.372(3)

B14
O19
1.376(3)

B15
O15
1.395(3)

B15
O16
1.348(3)

B15
O20
1.369(3)

C1
C2
1.396(3)

C1
C6
1.392(3)

C1
P1
1.796(2)

C2
C3
1.388(3)

C3
C4
1.383(4)

C4
C5
1.369(4)

C5
C6
1.386(3)

C7
C8
1.402(3)

C7
C12
1.397(3)

C7
P1
1.802(2)

C8
C9
1.391(3)

C9
C10
1.386(3)

C10
C11
1.387(3)

C11
C12
1.389(3)

C13
C14
1.398(3)

C13
C18
1.402(3)

C13
P1
1.795(2)

C14
C15
1.387(3)

C15
C16
1.387(4)

C16
C17
1.383(3)

C17
C18
1.385(3)

C19
C20
1.534(3)

C19
C21
1.537(3)

C19
P1
1.821(2)

C31
C32
1.394(3)

C31
C36
1.396(3)

C31
P31
1.798(2)

C32
C33
1.388(3)

C33
C34
1.388(4)

C34
C35
1.380(4)

C35
C36
1.387(3)

C37
C38
1.396(3)

C37
C42
1.401(3)

C37
P31
1.795(2)

C38
C39
1.384(3)

C39
C40
1.383(4)

C40
C41
1.381(4)

C41
C42
1.384(3)

C43
C44
1.405(3)

C43
C48
1.395(3)

C43
P31
1.798(2)

C44
C45
1.390(3)

C45
C46
1.384(3)

C46
C47
1.389(3)

C47
C48
1.390(3)

C49
C50
1.535(3)

C49
C51
1.535(3)

C49
P31
1.822(2)


Table S12: Bond Angles in ° for 2010src0454b.

Atom
Atom
Atom
Angle/°
O1
B1
O4
107.16(17)

O3
B1
O1
110.41(16)

O3
B1
O4
109.53(19)

O3
B1
O6
109.04(18)

O6
B1
O1
109.58(19)

O6
B1
O4
111.10(16)

O1
B2
O2
122.0(2)

O1
B2
O7
121.4(2)

O7
B2
O2
116.67(18)

O3
B3
O2
120.4(2)

O8
B3
O2
120.97(19)

O8
B3
O3
118.7(2)

O4
B4
O5
120.91(19)

O4
B4
O9
120.53(19)

O9
B4
O5
118.55(18)

O6
B5
O5
121.48(19)

O6
B5
O10
120.15(19)

O10
B5
O5
118.36(18)

B2
O1
B1
122.38(18)

B2
O2
B3
118.55(17)

B3
O3
B1
123.39(18)

B4
O4
B1
123.04(16)

B4
O5
B5
118.87(16)

B5
O6
B1
122.94(17)

O13
B11
O11
111.19(16)

O13
B11
O14
108.68(18)

O14
B11
O11
106.24(17)

O16
B11
O11
109.48(18)

O16
B11
O13
110.15(18)

O16
B11
O14
111.03(16)

O11
B12
O12
121.15(19)

O11
B12
O17
120.38(19)

O17
B12
O12
118.46(18)

O13
B13
O12
121.1(2)

O13
B13
O18
119.9(2)

O18
B13
O12
118.99(18)

O14
B14
O15
121.9(2)

O14
B14
O19
120.7(2)

O15
B14
O19
117.38(18)

O16
B15
O15
121.6(2)

O16
B15
O20
122.2(2)

O20
B15
O15
116.21(19)

B12
O11
B11
122.58(16)

B12
O12
B13
119.02(16)

B13
O13
B11
122.97(17)

B14
O14
B11
122.21(18)

B14
O15
B15
118.40(17)

B15
O16
B11
123.18(18)

C2
C1
P1
120.05(16)

C6
C1
C2
120.4(2)

C6
C1
P1
119.37(17)

C3
C2
C1
119.0(2)

C4
C3
C2
120.2(2)

C5
C4
C3
120.6(2)

C4
C5
C6
120.4(2)

C5
C6
C1
119.3(2)

C8
C7
P1
120.97(16)

C12
C7
C8
120.37(19)

C12
C7
P1
118.47(15)

C9
C8
C7
119.3(2)

C10
C9
C8
120.1(2)

C9
C10
C11
120.7(2)

C10
C11
C12
120.0(2)

C11
C12
C7
119.6(2)

C14
C13
C18
119.6(2)

C14
C13
P1
120.80(17)

C18
C13
P1
119.48(16)

C15
C14
C13
119.8(2)

C16
C15
C14
120.3(2)

C17
C16
C15
120.1(2)

C16
C17
C18
120.5(2)

C17
C18
C13
119.7(2)

C20
C19
C21
110.60(17)

C20
C19
P1
110.42(15)

C21
C19
P1
110.08(15)

C1
P1
C7
108.96(9)

C1
P1
C19
109.87(10)

C7
P1
C19
111.31(10)

C13
P1
C1
109.89(10)

C13
P1
C7
108.13(10)

C13
P1
C19
108.65(9)

C32
C31
C36
119.5(2)

C32
C31
P31
120.34(16)

C36
C31
P31
120.07(17)

C33
C32
C31
119.9(2)

C32
C33
C34
120.0(2)

C35
C34
C33
120.3(2)

C34
C35
C36
120.0(2)

C35
C36
C31
120.2(2)

C38
C37
C42
120.2(2)

C38
C37
P31
120.44(16)

C42
C37
P31
119.08(17)

C39
C38
C37
119.4(2)

C40
C39
C38
120.3(2)

C41
C40
C39
120.5(2)

C40
C41
C42
120.3(2)

C41
C42
C37
119.4(2)

C44
C43
P31
121.06(16)

C48
C43
C44
120.14(19)

C48
C43
P31
118.49(15)

C45
C44
C43
119.2(2)

C46
C45
C44
120.4(2)

C45
C46
C47
120.4(2)

C46
C47
C48
120.0(2)

C47
C48
C43
119.8(2)

C50
C49
C51
110.61(17)

C50
C49
P31
110.30(15)

C51
C49
P31
110.12(15)

C31
P31
C43
109.40(10)

C31
P31
C49
108.88(9)

C37
P31
C31
108.97(10)

C37
P31
C43
107.84(9)

C37
P31
C49
110.84(10)

C43
P31
C49
110.87(10)


Table S13: Torsion Angles in ° for 2010src0454b.

Atom
Atom
Atom
Atom
Angle/°

O1
B1
O3
B3
-19.0(3)
O1
B1
O4
B4
131.12(19)
O1
B1
O6
B5
-133.5(2)
O1
B2
O2
B3
-8.7(3)
O2
B2
O1
B1
-2.5(3)
O2
B3
O3
B1
9.7(3)
O3
B1
O1
B2
15.3(3)
O3
B1
O4
B4
-109.1(2)
O3
B1
O6
B5
105.5(2)
O3
B3
O2
B2
5.2(3)
O4
B1
O1
B2
134.55(19)
O4
B1
O3
B3
-136.7(2)
O4
B1
O6
B5
-15.3(3)
O4
B4
O5
B5
-3.6(3)
O5
B4
O4
B1
-2.8(3)
O5
B5
O6
B1
10.5(4)
O6
B1
O1
B2
-104.8(2)
O6
B1
O3
B3
101.5(2)
O6
B1
O4
B4
11.4(3)
O6
B5
O5
B4
-0.2(3)
O7
B2
O1
B1
178.25(19)
O7
B2
O2
B3
170.57(19)
O8
B3
O2
B2
-175.0(2)
O8
B3
O3
B1
-170.1(2)
O9
B4
O4
B1
177.0(2)
O9
B4
O5
B5
176.6(2)
O10
B5
O5
B4
178.8(2)
O10
B5
O6
B1
-168.4(2)
O11
B11
O13
B13
-16.7(3)
O11
B11
O14
B14
132.28(19)
O11
B11
O16
B15
-131.3(2)
O11
B12
O12
B13
-4.3(3)
O12
B12
O11
B11
-3.0(3)
O12
B13
O13
B11
11.1(3)
O13
B11
O11
B12
12.6(3)
O13
B11
O14
B14
-108.0(2)
O13
B11
O16
B15
106.2(2)
O13
B13
O12
B12
0.4(3)
O14
B11
O11
B12
130.70(19)
O14
B11
O13
B13
-133.3(2)
O14
B11
O16
B15
-14.3(3)
O14
B14
O15
B15
-4.6(3)
O15
B14
O14
B11
-4.7(3)
O15
B15
O16
B11
6.6(3)
O16
B11
O11
B12
-109.3(2)
O16
B11
O13
B13
104.9(2)
O16
B11
O14
B14
13.3(3)
O16
B15
O15
B14
3.8(3)
O17
B12
O11
B11
176.84(19)
O17
B12
O12
B13
175.9(2)
O18
B13
O12
B12
179.2(2)
O18
B13
O13
B11
-167.8(2)
O19
B14
O14
B11
176.54(19)
O19
B14
O15
B15
174.25(19)
O20
B15
O15
B14
-175.23(19)
O20
B15
O16
B11
-174.5(2)
C1
C2
C3
C4
0.7(3)
C2
C1
C6
C5
-1.6(3)
C2
C1
P1
C7
-96.67(18)
C2
C1
P1
C13
145.03(16)
C2
C1
P1
C19
25.53(19)
C2
C3
C4
C5
-1.4(3)
C3
C4
C5
C6
0.7(4)
C4
C5
C6
C1
0.8(4)
C6
C1
C2
C3
0.8(3)
C6
C1
P1
C7
78.79(19)
C6
C1
P1
C13
-39.51(19)
C6
C1
P1
C19
-159.01(17)
C7
C8
C9
C10
-0.1(3)
C8
C7
C12
C11
0.2(3)
C8
C7
P1
C1
92.88(19)
C8
C7
P1
C13
-147.71(17)
C8
C7
P1
C19
-28.4(2)
C8
C9
C10
C11
0.0(3)
C9
C10
C11
C12
0.2(4)
C10
C11
C12
C7
-0.3(3)
C12
C7
C8
C9
0.1(3)
C12
C7
P1
C1
-82.12(18)
C12
C7
P1
C13
37.29(19)
C12
C7
P1
C19
156.56(16)
C13
C14
C15
C16
1.2(4)
C14
C13
C18
C17
0.6(3)
C14
C13
P1
C1
-27.9(2)
C14
C13
P1
C7
-146.74(17)
C14
C13
P1
C19
92.32(19)
C14
C15
C16
C17
0.6(4)
C15
C16
C17
C18
-1.8(4)
C16
C17
C18
C13
1.2(3)
C18
C13
C14
C15
-1.8(3)
C18
C13
P1
C1
155.49(16)
C18
C13
P1
C7
36.67(19)
C18
C13
P1
C19
-84.27(18)
C20
C19
P1
C1
-178.79(14)
C20
C19
P1
C7
-58.00(17)
C20
C19
P1
C13
60.95(17)
C21
C19
P1
C1
58.82(17)
C21
C19
P1
C7
179.61(15)
C21
C19
P1
C13
-61.44(18)
P1
C1
C2
C3
176.25(16)
P1
C1
C6
C5
-177.04(18)
P1
C7
C8
C9
-174.84(16)
P1
C7
C12
C11
175.19(17)
P1
C13
C14
C15
-178.35(17)
P1
C13
C18
C17
177.20(16)
C31
C32
C33
C34
-0.5(3)
C32
C31
C36
C35
1.7(3)
C32
C31
P31
C37
-152.52(17)
C32
C31
P31
C43
-34.8(2)
C32
C31
P31
C49
86.47(19)
C32
C33
C34
C35
1.1(4)
C33
C34
C35
C36
-0.4(4)
C34
C35
C36
C31
-1.0(4)
C36
C31
C32
C33
-0.9(3)
C36
C31
P31
C37
30.7(2)
C36
C31
P31
C43
148.35(17)
C36
C31
P31
C49
-90.34(19)
C37
C38
C39
C40
-0.5(3)
C38
C37
C42
C41
1.3(3)
C38
C37
P31
C31
-146.52(16)
C38
C37
P31
C43
94.81(18)
C38
C37
P31
C49
-26.73(19)
C38
C39
C40
C41
0.6(3)
C39
C40
C41
C42
0.3(3)
C40
C41
C42
C37
-1.2(3)
C42
C37
C38
C39
-0.4(3)
C42
C37
P31
C31
39.81(19)
C42
C37
P31
C43
-78.85(18)
C42
C37
P31
C49
159.61(16)
C43
C44
C45
C46
0.0(3)
C44
C43
C48
C47
-0.5(3)
C44
C43
P31
C31
147.61(17)
C44
C43
P31
C37
-94.01(18)
C44
C43
P31
C49
27.5(2)
C44
C45
C46
C47
-0.2(3)
C45
C46
C47
C48
0.0(3)
C46
C47
C48
C43
0.4(3)
C48
C43
C44
C45
0.3(3)
C48
C43
P31
C31
-38.77(19)
C48
C43
P31
C37
79.61(18)
C48
C43
P31
C49
-158.87(16)
C50
C49
P31
C31
61.19(18)
C50
C49
P31
C37
-58.66(17)
C50
C49
P31
C43
-178.40(15)
C51
C49
P31
C31
-61.17(16)
C51
C49
P31
C37
178.98(14)
C51
C49
P31
C43
59.24(16)
P31
C31
C32
C33
-177.73(17)
P31
C31
C36
C35
178.48(17)
P31
C37
C38
C39
-173.99(16)
P31
C37
C42
C41
174.97(16)
P31
C43
C44
C45
173.84(16)
P31
C43
C48
C47
-174.22(17)

Table S14: Hydrogen Fractional Atomic Coordinates (×104) and Equivalent Isotropic Displacement Parameters (Å2×103) for 2010src0454b. Ueq is defined as 1/3 of the trace of the orthogonalised Uij.

Atom
x
y
z
Ueq
H7
3372.18
3114.26
3266.71
37
H8A
2375.5
7189.35
2463.1
55
H9A
-2984.18
3371.48
1622.79
41
H10A
-4543.55
4146.1
3287.41
57
H17A
1660.29
8320.37
-3390.73
40
H18A
81.14
9051.02
-1716.59
59
H19A
8024.87
8132.46
-1790.71
41
H20
5600.84
12328.89
-2857.82
50
H2
2738.33
9360.84
-860.01
33
H3
2081.06
11093.92
-952.61
43
H4
1446.83
11704.61
-123.93
43
H5
1363.42
10600.02
795.72
48
H6
1960.55
8858.66
904.66
39
H8
992.87
6932.03
-627.07
28
H9
-1329.56
6201.38
-466.56
35
H10
-2576.27
5782.91
470.24
35
H11
-1534.42
6083.27
1255.65
36
H12
775.94
6822.07
1105.64
30
H14
4737.07
8432.71
745.14
33
H15
6003.32
7743.21
1555.75
40
H16
5836.37
6003.12
2027.46
38
H17
4442.17
4939.83
1681.45
35
H18
3100.32
5619.73
893.85
29
H19
3425.61
7677.85
-875.86
26
H20A
4842.69
6149.85
-823.65
42
H20B
3339.38
5893.88
-406.17
42
H20C
4826.38
5970.21
-133.02
42
H21A
5931.96
7718.01
-266.4
47
H21B
5187.74
8709.04
-662.64
47
H21C
6013.32
7860.08
-956.61
47
H32
1663.65
9350.89
4036.8
33
H33
304.34
9964.48
3244.93
42
H34
-1091.03
8840.24
2940.19
45
H35
-1195.75
7117.6
3440.18
41
H36
115.22
6501.46
4244.46
34
H38
2235.98
5608.19
5797.34
32
H39
3087.24
3922.73
5864.31
40
H40
3814.87
3367.9
5022.77
41
H41
3736.13
4490.38
4107.35
41
H42
2949.53
6193.96
4025.34
32
H44
3770.26
8102.59
5593.95
28
H45
6075.21
8849.56
5446.04
33
H46
7364.76
9267.31
4518.11
36
H47
6377.98
8940.05
3725.87
34
H48
4082.54
8184.29
3863.23
28
H49
1416.42
7301.23
5834.17
26
H50A
-1143.35
7035.75
5931.42
46
H50B
-284.34
6222.16
5618.65
46
H50C
-1095.84
7200.9
5240.55
46
H51A
-71.85
8968.35
5096.21
43
H51B
1404.25
9085.95
5366.37
43
H51C
-86.92
8793.03
5786.52
43
H61A
-250.21
8265.1
-2763.56
41
H61B
-691.84
7464.52
-2958.77
41
H62A
5960.61
8640.33
-3340.39
42
H62B
7446.29
8445.32
-3337.11
42
H63A
5362.57
7546.61
-2088.5
37
H63B
4889.22
6749.75
-2278.75
37
H64A
518.61
8413.44
1938.97
93
H64B
-441.32
9203.34
1730.99
93
H65A
-1583.22
7549.21
2154.15
85
H65B
-1273.76
6519.81
2358.7
85
H66A
6526.28
6849.47
2895.27
71
H66B
5608.65
6082.09
3211.08
71
H67A
1325.9
3594.9
1702.74
42
H67B
2818.99
3426.48
1692.98
42

Table S15: Hydrogen Bond information for 2010src0454b.

D 
H 
A 
d(D-H)/Å 
d(H-A)/Å 
d(D-A)/Å 
D-H-A/deg 
O7
H7
O621
0.84
1.87
2.695(2)
168.1
O8
H8A
O202
0.84
1.87
2.685(2)
161.9
O9
H9A
O633
0.84
2.07
2.874(2)
160.8
O10
H10A
O74
0.84
1.90
2.734(2)
170.9
O17
H17A
O61
0.84
2.06
2.871(2)
162.3
O18
H18A
O194
0.84
1.87
2.703(2)
171.4
O20
H20
O662
0.84
1.88
2.703(3)
166.8
O61
H61A
O12
0.87
2.18
2.8776(19)
136.7
O61
H61B
O13
0.87
1.85
2.711(2)
170.1
O62
H62A
O11
0.87
1.93
2.788(2)
167.8
O62
H62B
O615
0.87
2.04
2.840(2)
153.2
O63
H63A
O14
0.87
1.84
2.698(2)
169.7
O63
H63B
O53
0.87
2.21
2.8865(19)
134.5
O64
H64A
O8
0.87
2.15
2.829(3)
134.4
O64
H64B
O186
0.87
2.07
2.936(3)
176.2
O65
H65A
O64
0.87
1.87
2.714(3)
162.9
O65
H65B
O3
0.87
1.94
2.797(2)
170.8
O66
H66A
O655
0.87
1.81
2.679(3)
173.0
O66
H66B
O105
0.87
2.27
3.069(3)
151.8
O67
H67A
O4
0.87
1.91
2.777(2)
171.9
O67
H67B
O631
0.87
2.05
2.856(2)
153.6
–––– 
11-x,1-y,-z; 21-x,2-y,-z; 3-x,1-y,-z; 4-1+x,+y,+z; 51+x,+y,+z; 6-x,2-y,-z


Citations for 2
COLLECT (Hooft, R.W.W., 1998)
DENZO (Otwinowski & Minor, 1997)
O.V. Dolomanov and L.J. Bourhis and R.J. Gildea and J.A.K. Howard and H. Puschmann, Olex2: A complete structure solution, refinement and analysis program, J. Appl. Cryst., (2009), 42, 339-341.
Sheldrick, G.M., A short history of ShelX, Acta Cryst., (2008), A64, 339-341.
Sheldrick, G.M., Crystal structure refinement with ShelXL, Acta Cryst., (2015), C71, 3-8.


TGA plots for [MePPh3][B5O6(OH)4].2H2O (1) and [iPrPPh3][B5O6(OH)4].3.5H2O (2).
	Chart, line chart

Description automatically generated

Figure  S10. TGA data for the thermal decomposition of tetraalkylphosphonium
pentaborate salts. The plot labelled ‘36’ is [MePPh3][B5O6(OH)4].2H2O (1) that labelled ‘37’ is [iPrPPh3][B5O6(OH)4].3.5H2O (2). For comparison the line labelled ‘34’ is [PPh4][B5O6(OH)4].1.5H2O. (Taken from Ref. 39 in Manuscript).
