# Supplementary material for: Synthesis and Thermal Studies of Two Phosphonium Tetrahydroxidohexaoxidopentaborate(1-) Salts: Single-Crystal XRD Characterization of [iPrPPh3][B5O6(OH)4]·3.5H2O and [MePPh3][B5O6(OH)4]·B(OH)3·0.5H2O
Source: Molecules. 2023 Sep 29;28(19):6867. doi: 10.3390/molecules28196867 (PMC10574587; doi:10.3390/molecules28196867)
Supplement: Supplementary file 1 [file molecules-28-06867-s001.zip › MAB1.cif]

data_MAB1

#2010src0454b

_audit_creation_date               2023-08-29
_audit_creation_method
;
Olex2 1.5-alpha
(compiled 2023.08.24 svn.re1ec1418 for OlexSys, GUI svn.r6817)
;
_shelx_SHELXL_version_number       '2018/3'
loop_
  _audit_author_name
  _audit_author_email
  _audit_author_address
 'Beckett, M.A.' ''
;
Bangor University
School of Chemistry
Bangor
LL57 2UW
UK
;
 'Horton, P.N.' pnh@soton.ac.uk
;
University of Southampton
Chemistry
Southampton
SO17 1BJ
UK
;

_audit_contact_author_address      ?
_audit_contact_author_email        ?
_audit_contact_author_name         ''
_audit_contact_author_phone        ?
_publ_contact_author_id_orcid      ?
_publ_section_references
;
Dolomanov, O.V., Bourhis, L.J., Gildea, R.J, Howard, J.A.K. & Puschmann, H.
 (2009), J. Appl. Cryst. 42, 339-341.

Sheldrick, G.M. (2015). Acta Cryst. C71, 3-8.
;
_chemical_name_common              ?
_chemical_name_systematic
;
 ?
;
_chemical_formula_moiety           'B5 H4 O10, C21 H22 P, 3.5(H2 O)'
_chemical_formula_sum              'C21 H33 B5 O13.50 P'
_chemical_formula_weight           586.49
_chemical_melting_point            ?
loop_
  _atom_type_symbol
  _atom_type_description
  _atom_type_scat_dispersion_real
  _atom_type_scat_dispersion_imag
  _atom_type_scat_source
 'C' 'C' 0.0033 0.0016 'International Tables Vol C Tables 4.2.6.8 and 6.1.1.4'
 'H' 'H' 0.0000 0.0000 'International Tables Vol C Tables 4.2.6.8 and 6.1.1.4'
 'B' 'B' 0.0013 0.0007 'International Tables Vol C Tables 4.2.6.8 and 6.1.1.4'
 'O' 'O' 0.0106 0.0060 'International Tables Vol C Tables 4.2.6.8 and 6.1.1.4'
 'P' 'P' 0.1023 0.0942 'International Tables Vol C Tables 4.2.6.8 and 6.1.1.4'

_shelx_space_group_comment
;
The symmetry employed for this shelxl refinement is uniquely defined
by the following loop, which should always be used as a source of
symmetry information in preference to the above space-group names.
They are only intended as comments.
;
_space_group_crystal_system        'triclinic'
_space_group_IT_number             2
_space_group_name_H-M_alt          'P -1'
_space_group_name_Hall             '-P 1'
loop_
  _space_group_symop_operation_xyz
 'x, y, z'
 '-x, -y, -z'

_cell_length_a                     9.1810(3)
_cell_length_b                     13.4812(5)
_cell_length_c                     23.8357(8)
_cell_angle_alpha                  75.3130(10)
_cell_angle_beta                   83.095(2)
_cell_angle_gamma                  86.919(2)
_cell_volume                       2832.24(17)
_cell_formula_units_Z              4
_cell_measurement_reflns_used      12555
_cell_measurement_temperature      120(2)
_cell_measurement_theta_max        27.485
_cell_measurement_theta_min        2.910
_shelx_estimated_absorpt_T_max     0.981
_shelx_estimated_absorpt_T_min     0.959
_exptl_absorpt_coefficient_mu      0.162
_exptl_absorpt_correction_T_max    0.9809
_exptl_absorpt_correction_T_min    0.9592
_exptl_absorpt_correction_type     multi-scan
_exptl_absorpt_process_details     'SADABS 2007/2 (Sheldrick, G.M., 2007)'
_exptl_absorpt_special_details     ?
_exptl_crystal_colour              colourless
_exptl_crystal_colour_primary      colourless
_exptl_crystal_density_diffrn      1.375
_exptl_crystal_density_meas        x
_exptl_crystal_density_method      'not measured'
_exptl_crystal_description         Block
_exptl_crystal_F_000               1228
_exptl_crystal_size_max            0.26
_exptl_crystal_size_mid            0.18
_exptl_crystal_size_min            0.12
_exptl_special_details
;
SADABS was used to perform the Absorption correction
Estimated minimum and maximum transmission: 0.6231 0.7456
The given Tmin and Tmax were generated using the SHELX SIZE command
;
_exptl_transmission_factor_max     ?
_exptl_transmission_factor_min     ?
_diffrn_reflns_av_R_equivalents    0.0578
_diffrn_reflns_av_unetI/netI       0.0544
_diffrn_reflns_Laue_measured_fraction_full  0.997
_diffrn_reflns_Laue_measured_fraction_max  0.989
_diffrn_reflns_limit_h_max         11
_diffrn_reflns_limit_h_min         -11
_diffrn_reflns_limit_k_max         17
_diffrn_reflns_limit_k_min         -17
_diffrn_reflns_limit_l_max         30
_diffrn_reflns_limit_l_min         -30
_diffrn_reflns_number              50870
_diffrn_reflns_point_group_measured_fraction_full  0.997
_diffrn_reflns_point_group_measured_fraction_max  0.989
_diffrn_reflns_theta_full          25.242
_diffrn_reflns_theta_max           27.605
_diffrn_reflns_theta_min           2.941
_diffrn_ambient_temperature        120(2)
_diffrn_detector_area_resol_mean   9.091
_diffrn_measured_fraction_theta_full  0.997
_diffrn_measured_fraction_theta_max  0.989
_diffrn_measurement_device_type    Damien
_diffrn_measurement_method         '\f & \w scans'
_diffrn_radiation_monochromator    graphite
_diffrn_radiation_type             MoK\a
_diffrn_radiation_wavelength       0.71073
_diffrn_source                     'Bruker-Nonius FR591 rotating anode'
_diffrn_source_current             0.0
_diffrn_source_power               0.0
_diffrn_source_voltage             0.0
_diffrn_standards_number           0
_reflns_Friedel_coverage           0.000
_reflns_Friedel_fraction_full      .
_reflns_Friedel_fraction_max       .
_reflns_number_gt                  9308
_reflns_number_total               12947
_reflns_special_details
;
 Reflections were merged by SHELXL according to the crystal
 class for the calculation of statistics and refinement.
 
 _reflns_Friedel_fraction is defined as the number of unique
 Friedel pairs measured divided by the number that would be
 possible theoretically, ignoring centric projections and
 systematic absences.
;
_reflns_threshold_expression       >2sigma(I)
_computing_cell_refinement        
 'DENZO (Otwinowski & Minor, 1997) & COLLECT (Hooft, R.W.W., 1998)'
_computing_data_collection         'COLLECT (Hooft, R.W.W., 1998)'
_computing_data_reduction         
 'DENZO (Otwinowski & Minor, 1997) & COLLECT (Hooft, R.W.W., 1998)'
_computing_molecular_graphics      'Olex2 1.5-alpha (Dolomanov et al., 2009)'
_computing_publication_material    'Olex2 1.5-alpha (Dolomanov et al., 2009)'
_computing_structure_refinement    'SHELXL 2018/3 (Sheldrick, 2015)'
_computing_structure_solution      'SHELXS-97 (Sheldrick, 2008)'
_refine_diff_density_max           0.940
_refine_diff_density_min           -0.540
_refine_diff_density_rms           0.099
_refine_ls_extinction_coef         .
_refine_ls_extinction_method       none
_refine_ls_goodness_of_fit_ref     1.038
_refine_ls_hydrogen_treatment      constr
_refine_ls_matrix_type             full
_refine_ls_number_parameters       763
_refine_ls_number_reflns           12993
_refine_ls_number_restraints       1
_refine_ls_R_factor_all            0.0831
_refine_ls_R_factor_gt             0.0563
_refine_ls_restrained_S_all        1.038
_refine_ls_shift/su_max            0.001
_refine_ls_shift/su_mean           0.000
_refine_ls_structure_factor_coef   Fsqd
_refine_ls_weighting_details      
 'w=1/[\s^2^(Fo^2^)+(0.0750P)^2^+1.5021P] where P=(Fo^2^+2Fc^2^)/3'
_refine_ls_weighting_scheme        calc
_refine_ls_wR_factor_gt            0.1416
_refine_ls_wR_factor_ref           0.1571
_refine_special_details           
 'There is a pseudo body-centring, but multiple reflections are observed which should be absent if it truly existed'
_olex2_refinement_description
;
1. Fixed Uiso
 At 1.2 times of:
  All C(H) groups
 At 1.5 times of:
  All C(H,H,H) groups, All O(H) groups, All O(H,H) groups
2. Restrained distances
 H66B-O10_$2
 2.2 with sigma of 0.02
3.a Free rotating group:
 O61(H61A,H61B), O62(H62A,H62B), O63(H63A,H63B), O64(H64A,H64B), O65(H65A,
 H65B), O66(H66A,H66B), O67(H67A,H67B)
3.b Ternary CH refined with riding coordinates:
 C19(H19), C49(H49)
3.c Aromatic/amide H refined with riding coordinates:
 C2(H2), C3(H3), C4(H4), C5(H5), C6(H6), C8(H8), C9(H9), C10(H10), C11(H11),
 C12(H12), C14(H14), C15(H15), C16(H16), C17(H17), C18(H18), C32(H32), C33(H33),
  C34(H34), C35(H35), C36(H36), C38(H38), C39(H39), C40(H40), C41(H41),
 C42(H42), C44(H44), C45(H45), C46(H46), C47(H47), C48(H48)
3.d Idealised Me refined as rotating group:
 C20(H20A,H20B,H20C), C21(H21A,H21B,H21C), C50(H50A,H50B,H50C), C51(H51A,H51B,
 H51C)
3.e Idealised tetrahedral OH refined as rotating group:
 O7(H7), O8(H8A), O9(H9A), O10(H10A), O17(H17A), O18(H18A), O19(H19A), O20(H20)
;
_atom_sites_solution_hydrogens     mixed
_atom_sites_solution_primary       ?
_atom_sites_solution_secondary     ?
loop_
  _atom_site_label
  _atom_site_type_symbol
  _atom_site_fract_x
  _atom_site_fract_y
  _atom_site_fract_z
  _atom_site_U_iso_or_equiv
  _atom_site_adp_type
  _atom_site_occupancy
  _atom_site_site_symmetry_order
  _atom_site_calc_flag
  _atom_site_refinement_flags_posn
  _atom_site_refinement_flags_adp
  _atom_site_refinement_flags_occupancy
  _atom_site_disorder_assembly
  _atom_site_disorder_group
 B1 B -0.0021(2) 0.4492(2) 0.25829(11) 0.0238(5) Uani 1 1 d . . . . .
 B2 B 0.2426(2) 0.4321(2) 0.29493(10) 0.0217(5) Uani 1 1 d . . . . .
 B3 B 0.1534(3) 0.5989(2) 0.24903(12) 0.0259(5) Uani 1 1 d . . . . .
 B4 B -0.1784(2) 0.38193(18) 0.20597(10) 0.0196(5) Uani 1 1 d . . . . .
 B5 B -0.2637(2) 0.4251(2) 0.29618(11) 0.0239(5) Uani 1 1 d . . . . .
 O1 O 0.12403(15) 0.38812(12) 0.28334(7) 0.0239(3) Uani 1 1 d . . . . .
 O2 O 0.25578(15) 0.53677(12) 0.28204(7) 0.0258(3) Uani 1 1 d . . . . .
 O3 O 0.03734(15) 0.55658(12) 0.23426(7) 0.0278(4) Uani 1 1 d . . . . .
 O4 O -0.03984(14) 0.40547(11) 0.21093(6) 0.0223(3) Uani 1 1 d . . . . .
 O5 O -0.29402(14) 0.39392(11) 0.24746(6) 0.0217(3) Uani 1 1 d . . . . .
 O6 O -0.12597(15) 0.44347(13) 0.30391(7) 0.0294(4) Uani 1 1 d . . . . .
 O7 O 0.35655(15) 0.37387(12) 0.31961(7) 0.0250(3) Uani 1 1 d . . . . .
 H7 H 0.337218 0.311426 0.326671 0.037 Uiso 1 1 calc R U . . .
 O8 O 0.16753(17) 0.70176(12) 0.23141(8) 0.0365(4) Uani 1 1 d . . . . .
 H8A H 0.237550 0.718935 0.246310 0.055 Uiso 1 1 calc R U . . .
 O9 O -0.20788(15) 0.34629(13) 0.15996(7) 0.0271(4) Uani 1 1 d . . . . .
 H9A H -0.298418 0.337148 0.162279 0.041 Uiso 1 1 calc R U . . .
 O10 O -0.37805(16) 0.43850(15) 0.33597(7) 0.0378(4) Uani 1 1 d . . . . .
 H10A H -0.454355 0.414610 0.328741 0.057 Uiso 1 1 calc R U . . .
 B11 B 0.4574(2) 0.94939(19) -0.24326(11) 0.0218(5) Uani 1 1 d . . . . .
 B12 B 0.2838(2) 0.88066(18) -0.29606(10) 0.0188(5) Uani 1 1 d . . . . .
 B13 B 0.1984(2) 0.9160(2) -0.20377(11) 0.0239(5) Uani 1 1 d . . . . .
 B14 B 0.7063(2) 0.9341(2) -0.20989(10) 0.0218(5) Uani 1 1 d . . . . .
 B15 B 0.6112(3) 1.0990(2) -0.25433(11) 0.0242(5) Uani 1 1 d . . . . .
 O11 O 0.42149(14) 0.90697(11) -0.29165(6) 0.0208(3) Uani 1 1 d . . . . .
 O12 O 0.16879(14) 0.88778(11) -0.25356(6) 0.0219(3) Uani 1 1 d . . . . .
 O13 O 0.33612(15) 0.93691(12) -0.19655(6) 0.0260(3) Uani 1 1 d . . . . .
 O14 O 0.58658(15) 0.88894(11) -0.21990(7) 0.0236(3) Uani 1 1 d . . . . .
 O15 O 0.71954(15) 1.03864(12) -0.22458(7) 0.0279(4) Uani 1 1 d . . . . .
 O16 O 0.49133(15) 1.05735(11) -0.26577(7) 0.0265(3) Uani 1 1 d . . . . .
 O17 O 0.25505(15) 0.84664(13) -0.34279(7) 0.0264(3) Uani 1 1 d . . . . .
 H17A H 0.166029 0.832037 -0.339073 0.040 Uiso 1 1 calc R U . . .
 O18 O 0.08576(16) 0.92414(16) -0.16259(8) 0.0395(5) Uani 1 1 d . . . . .
 H18A H 0.008114 0.905102 -0.171659 0.059 Uiso 1 1 calc R U . . .
 O19 O 0.82080(15) 0.87573(12) -0.18534(7) 0.0271(4) Uani 1 1 d . . . . .
 H19A H 0.802487 0.813246 -0.179071 0.041 Uiso 1 1 calc R U . . .
 O20 O 0.63482(17) 1.20224(12) -0.27191(8) 0.0331(4) Uani 1 1 d . . . . .
 H20 H 0.560084 1.232889 -0.285782 0.050 Uiso 1 1 calc R U . . .
 C1 C 0.2430(2) 0.89493(16) 0.00334(9) 0.0205(4) Uani 1 1 d . . . . .
 C2 C 0.2460(2) 0.96103(17) -0.05229(10) 0.0279(5) Uani 1 1 d . . . . .
 H2 H 0.273833 0.936084 -0.086001 0.033 Uiso 1 1 calc R U . . .
 C3 C 0.2076(3) 1.06372(18) -0.05764(12) 0.0355(6) Uani 1 1 d . . . . .
 H3 H 0.208106 1.109392 -0.095261 0.043 Uiso 1 1 calc R U . . .
 C4 C 0.1686(2) 1.09976(19) -0.00840(13) 0.0355(6) Uani 1 1 d . . . . .
 H4 H 0.144683 1.170461 -0.012393 0.043 Uiso 1 1 calc R U . . .
 C5 C 0.1643(3) 1.0344(2) 0.04608(13) 0.0396(6) Uani 1 1 d . . . . .
 H5 H 0.136342 1.060002 0.079572 0.048 Uiso 1 1 calc R U . . .
 C6 C 0.2004(3) 0.93129(18) 0.05267(11) 0.0323(5) Uani 1 1 d . . . . .
 H6 H 0.196055 0.885866 0.090466 0.039 Uiso 1 1 calc R U . . .
 C7 C 0.1105(2) 0.69460(15) 0.02261(9) 0.0198(4) Uani 1 1 d . . . . .
 C8 C 0.0481(2) 0.67620(17) -0.02459(10) 0.0237(5) Uani 1 1 d . . . . .
 H8 H 0.099287 0.693203 -0.062707 0.028 Uiso 1 1 calc R U . . .
 C9 C -0.0896(2) 0.63278(18) -0.01497(11) 0.0292(5) Uani 1 1 d . . . . .
 H9 H -0.132956 0.620138 -0.046656 0.035 Uiso 1 1 calc R U . . .
 C10 C -0.1636(2) 0.60793(17) 0.04076(11) 0.0296(5) Uani 1 1 d . . . . .
 H10 H -0.257627 0.578291 0.047024 0.035 Uiso 1 1 calc R U . . .
 C11 C -0.1019(2) 0.62588(18) 0.08751(11) 0.0299(5) Uani 1 1 d . . . . .
 H11 H -0.153442 0.608327 0.125565 0.036 Uiso 1 1 calc R U . . .
 C12 C 0.0352(2) 0.66951(17) 0.07868(10) 0.0253(5) Uani 1 1 d . . . . .
 H12 H 0.077594 0.682207 0.110564 0.030 Uiso 1 1 calc R U . . .
 C13 C 0.3772(2) 0.70993(16) 0.07452(9) 0.0209(4) Uani 1 1 d . . . . .
 C14 C 0.4656(2) 0.77266(18) 0.09399(10) 0.0276(5) Uani 1 1 d . . . . .
 H14 H 0.473707 0.843271 0.074514 0.033 Uiso 1 1 calc R U . . .
 C15 C 0.5416(2) 0.7315(2) 0.14186(11) 0.0333(6) Uani 1 1 d . . . . .
 H15 H 0.600332 0.774321 0.155575 0.040 Uiso 1 1 calc R U . . .
 C16 C 0.5322(2) 0.6280(2) 0.16975(10) 0.0316(5) Uani 1 1 d . . . . .
 H16 H 0.583637 0.600312 0.202746 0.038 Uiso 1 1 calc R U . . .
 C17 C 0.4480(2) 0.56517(19) 0.14960(10) 0.0291(5) Uani 1 1 d . . . . .
 H17 H 0.444217 0.493983 0.168145 0.035 Uiso 1 1 calc R U . . .
 C18 C 0.3692(2) 0.60524(17) 0.10258(9) 0.0242(5) Uani 1 1 d . . . . .
 H18 H 0.310032 0.561973 0.089385 0.029 Uiso 1 1 calc R U . . .
 C19 C 0.3962(2) 0.73988(16) -0.05257(9) 0.0220(4) Uani 1 1 d . . . . .
 H19 H 0.342561 0.767785 -0.087586 0.026 Uiso 1 1 calc R U . . .
 C20 C 0.4270(2) 0.62494(17) -0.04668(10) 0.0277(5) Uani 1 1 d . . . . .
 H20A H 0.484269 0.614985 -0.082365 0.042 Uiso 1 1 calc R U . . .
 H20B H 0.333938 0.589388 -0.040617 0.042 Uiso 1 1 calc R U . . .
 H20C H 0.482638 0.597021 -0.013302 0.042 Uiso 1 1 calc R U . . .
 C21 C 0.5404(2) 0.79736(19) -0.06105(11) 0.0311(5) Uani 1 1 d . . . . .
 H21A H 0.593196 0.771801 -0.026640 0.047 Uiso 1 1 calc R U . . .
 H21B H 0.518774 0.870904 -0.066264 0.047 Uiso 1 1 calc R U . . .
 H21C H 0.601332 0.786008 -0.095661 0.047 Uiso 1 1 calc R U . . .
 P1 P 0.28138(5) 0.76026(4) 0.01157(2) 0.01753(13) Uani 1 1 d . . . . .
 C31 C 0.1041(2) 0.78618(17) 0.42131(9) 0.0216(4) Uani 1 1 d . . . . .
 C32 C 0.1085(2) 0.88956(18) 0.39166(10) 0.0273(5) Uani 1 1 d . . . . .
 H32 H 0.166365 0.935089 0.403680 0.033 Uiso 1 1 calc R U . . .
 C33 C 0.0281(3) 0.9259(2) 0.34454(11) 0.0350(6) Uani 1 1 d . . . . .
 H33 H 0.030434 0.996448 0.324493 0.042 Uiso 1 1 calc R U . . .
 C34 C -0.0556(3) 0.8592(2) 0.32672(10) 0.0373(6) Uani 1 1 d . . . . .
 H34 H -0.109103 0.884024 0.294019 0.045 Uiso 1 1 calc R U . . .
 C35 C -0.0616(3) 0.7570(2) 0.35625(11) 0.0344(6) Uani 1 1 d . . . . .
 H35 H -0.119575 0.711760 0.344018 0.041 Uiso 1 1 calc R U . . .
 C36 C 0.0170(2) 0.72029(19) 0.40377(10) 0.0284(5) Uani 1 1 d . . . . .
 H36 H 0.011522 0.650146 0.424446 0.034 Uiso 1 1 calc R U . . .
 C37 C 0.2498(2) 0.60611(16) 0.49050(9) 0.0204(4) Uani 1 1 d . . . . .
 C38 C 0.2544(2) 0.53846(17) 0.54536(10) 0.0267(5) Uani 1 1 d . . . . .
 H38 H 0.223598 0.560819 0.579734 0.032 Uiso 1 1 calc R U . . .
 C39 C 0.3044(3) 0.43855(18) 0.54922(12) 0.0335(6) Uani 1 1 d . . . . .
 H39 H 0.308724 0.392273 0.586431 0.040 Uiso 1 1 calc R U . . .
 C40 C 0.3482(2) 0.40571(18) 0.49922(12) 0.0339(6) Uani 1 1 d . . . . .
 H40 H 0.381487 0.336790 0.502277 0.041 Uiso 1 1 calc R U . . .
 C41 C 0.3438(2) 0.47238(19) 0.44486(12) 0.0340(6) Uani 1 1 d . . . . .
 H41 H 0.373613 0.449038 0.410735 0.041 Uiso 1 1 calc R U . . .
 C42 C 0.2962(2) 0.57310(17) 0.43990(10) 0.0268(5) Uani 1 1 d . . . . .
 H42 H 0.294953 0.619396 0.402534 0.032 Uiso 1 1 calc R U . . .
 C43 C 0.3701(2) 0.80766(15) 0.47390(9) 0.0196(4) Uani 1 1 d . . . . .
 C44 C 0.4297(2) 0.82718(16) 0.52153(10) 0.0233(5) Uani 1 1 d . . . . .
 H44 H 0.377026 0.810259 0.559395 0.028 Uiso 1 1 calc R U . . .
 C45 C 0.5664(2) 0.87153(17) 0.51263(10) 0.0278(5) Uani 1 1 d . . . . .
 H45 H 0.607521 0.884956 0.544604 0.033 Uiso 1 1 calc R U . . .
 C46 C 0.6432(2) 0.89626(18) 0.45746(11) 0.0302(5) Uani 1 1 d . . . . .
 H46 H 0.736476 0.926731 0.451811 0.036 Uiso 1 1 calc R U . . .
 C47 C 0.5846(2) 0.87682(18) 0.41034(10) 0.0284(5) Uani 1 1 d . . . . .
 H47 H 0.637798 0.894005 0.372587 0.034 Uiso 1 1 calc R U . . .
 C48 C 0.4482(2) 0.83219(16) 0.41845(9) 0.0235(5) Uani 1 1 d . . . . .
 H48 H 0.408254 0.818429 0.386323 0.028 Uiso 1 1 calc R U . . .
 C49 C 0.0865(2) 0.75632(16) 0.54868(9) 0.0218(4) Uani 1 1 d . . . . .
 H49 H 0.141642 0.730123 0.583417 0.026 Uiso 1 1 calc R U . . .
 C50 C -0.0542(2) 0.69501(19) 0.55775(10) 0.0310(5) Uani 1 1 d . . . . .
 H50A H -0.114335 0.703575 0.593142 0.046 Uiso 1 1 calc R U . . .
 H50B H -0.028434 0.622216 0.561865 0.046 Uiso 1 1 calc R U . . .
 H50C H -0.109584 0.720090 0.524055 0.046 Uiso 1 1 calc R U . . .
 C51 C 0.0494(2) 0.87059(18) 0.54287(10) 0.0285(5) Uani 1 1 d . . . . .
 H51A H -0.007185 0.896835 0.509621 0.043 Uiso 1 1 calc R U . . .
 H51B H 0.140425 0.908595 0.536637 0.043 Uiso 1 1 calc R U . . .
 H51C H -0.008692 0.879303 0.578652 0.043 Uiso 1 1 calc R U . . .
 P31 P 0.20238(5) 0.73913(4) 0.48403(2) 0.01759(13) Uani 1 1 d . . . . .
 O61 O -0.05173(16) 0.81171(12) -0.30702(7) 0.0272(3) Uani 1 1 d G . . . .
 H61A H -0.025021 0.826510 -0.276356 0.041 Uiso 1 1 d G U . . .
 H61B H -0.069184 0.746452 -0.295877 0.041 Uiso 1 1 d G U . . .
 O62 O 0.66882(16) 0.83161(13) -0.34909(7) 0.0283(4) Uani 1 1 d G . . . .
 H62A H 0.596061 0.864033 -0.334039 0.042 Uiso 1 1 d G U . . .
 H62B H 0.744629 0.844532 -0.333711 0.042 Uiso 1 1 d G U . . .
 O63 O 0.51409(16) 0.69022(12) -0.19707(7) 0.0244(3) Uani 1 1 d G . . . .
 H63A H 0.536257 0.754661 -0.208850 0.037 Uiso 1 1 d G U . . .
 H63B H 0.488922 0.674975 -0.227875 0.037 Uiso 1 1 d G U . . .
 O64 O -0.0252(3) 0.85570(18) 0.17505(10) 0.0621(6) Uani 1 1 d G . . . .
 H64A H 0.051861 0.841344 0.193897 0.093 Uiso 1 1 d G U . . .
 H64B H -0.044132 0.920334 0.173099 0.093 Uiso 1 1 d G U . . .
 O65 O -0.2000(2) 0.69625(17) 0.23054(11) 0.0564(6) Uani 1 1 d G . . . .
 H65A H -0.158322 0.754921 0.215415 0.085 Uiso 1 1 d G U . . .
 H65B H -0.127376 0.651981 0.235870 0.085 Uiso 1 1 d G U . . .
 O66 O 0.5825(2) 0.67150(15) 0.31815(9) 0.0475(5) Uani 1 1 d G . . . .
 H66A H 0.652628 0.684947 0.289527 0.071 Uiso 1 1 d G U . . .
 H66B H 0.560865 0.608209 0.321108 0.071 Uiso 1 1 d DG U . . .
 O67 O 0.20619(16) 0.32992(13) 0.15377(7) 0.0279(4) Uani 1 1 d G . . . .
 H67A H 0.132590 0.359490 0.170274 0.042 Uiso 1 1 d G U . . .
 H67B H 0.281899 0.342648 0.169298 0.042 Uiso 1 1 d G U . . .

loop_
  _atom_site_aniso_label
  _atom_site_aniso_U_11
  _atom_site_aniso_U_22
  _atom_site_aniso_U_33
  _atom_site_aniso_U_23
  _atom_site_aniso_U_13
  _atom_site_aniso_U_12
 B1 0.0119(10) 0.0339(14) 0.0281(14) -0.0121(11) -0.0016(9) -0.0027(9)
 B2 0.0141(10) 0.0343(14) 0.0177(12) -0.0091(10) 0.0022(9) -0.0056(9)
 B3 0.0153(11) 0.0328(15) 0.0326(15) -0.0134(12) -0.0028(10) 0.0001(10)
 B4 0.0153(10) 0.0236(12) 0.0199(12) -0.0047(10) -0.0027(9) -0.0009(9)
 B5 0.0136(10) 0.0364(15) 0.0251(13) -0.0131(11) -0.0020(9) -0.0048(9)
 O1 0.0136(7) 0.0303(9) 0.0288(9) -0.0075(7) -0.0042(6) -0.0046(6)
 O2 0.0150(7) 0.0320(9) 0.0328(9) -0.0104(7) -0.0042(6) -0.0052(6)
 O3 0.0157(7) 0.0284(9) 0.0424(10) -0.0126(7) -0.0077(7) -0.0007(6)
 O4 0.0129(6) 0.0314(9) 0.0249(8) -0.0112(7) -0.0015(6) -0.0022(6)
 O5 0.0123(6) 0.0330(9) 0.0228(8) -0.0116(7) -0.0023(6) -0.0029(6)
 O6 0.0134(7) 0.0531(11) 0.0280(9) -0.0212(8) -0.0011(6) -0.0057(7)
 O7 0.0146(7) 0.0331(9) 0.0281(9) -0.0077(7) -0.0040(6) -0.0052(6)
 O8 0.0227(8) 0.0294(9) 0.0608(12) -0.0138(8) -0.0119(8) -0.0021(7)
 O9 0.0167(7) 0.0420(10) 0.0265(9) -0.0149(7) -0.0035(6) -0.0024(7)
 O10 0.0150(7) 0.0719(13) 0.0366(10) -0.0322(9) 0.0020(7) -0.0116(8)
 B11 0.0140(10) 0.0287(13) 0.0252(13) -0.0103(10) -0.0026(9) -0.0030(9)
 B12 0.0161(10) 0.0209(12) 0.0189(12) -0.0041(9) -0.0012(8) -0.0015(9)
 B13 0.0149(10) 0.0338(14) 0.0258(13) -0.0119(11) -0.0036(9) -0.0012(9)
 B14 0.0141(10) 0.0331(14) 0.0198(12) -0.0096(10) 0.0006(9) -0.0048(9)
 B15 0.0193(11) 0.0276(14) 0.0277(14) -0.0115(11) 0.0010(9) -0.0042(9)
 O11 0.0127(6) 0.0271(8) 0.0236(8) -0.0077(6) -0.0020(5) -0.0037(6)
 O12 0.0129(6) 0.0334(9) 0.0219(8) -0.0104(7) -0.0029(6) -0.0038(6)
 O13 0.0143(7) 0.0427(10) 0.0252(8) -0.0151(7) -0.0023(6) -0.0055(6)
 O14 0.0144(7) 0.0271(8) 0.0301(9) -0.0064(7) -0.0061(6) -0.0033(6)
 O15 0.0176(7) 0.0317(9) 0.0367(10) -0.0106(7) -0.0047(6) -0.0079(6)
 O16 0.0198(7) 0.0249(8) 0.0369(9) -0.0090(7) -0.0074(6) -0.0025(6)
 O17 0.0159(7) 0.0413(10) 0.0261(8) -0.0149(7) -0.0027(6) -0.0036(6)
 O18 0.0155(7) 0.0782(14) 0.0351(10) -0.0331(9) 0.0021(7) -0.0123(8)
 O19 0.0144(7) 0.0363(9) 0.0325(9) -0.0096(7) -0.0059(6) -0.0047(6)
 O20 0.0273(8) 0.0284(9) 0.0466(11) -0.0128(8) -0.0068(8) -0.0051(7)
 C1 0.0123(9) 0.0226(11) 0.0267(12) -0.0062(9) -0.0028(8) 0.0004(8)
 C2 0.0281(11) 0.0248(12) 0.0327(13) -0.0069(10) -0.0125(10) 0.0005(9)
 C3 0.0339(13) 0.0223(12) 0.0494(16) 0.0004(11) -0.0206(12) -0.0020(10)
 C4 0.0177(10) 0.0233(12) 0.0671(19) -0.0137(12) -0.0063(11) 0.0020(9)
 C5 0.0348(13) 0.0318(14) 0.0529(18) -0.0199(13) 0.0125(12) 0.0000(11)
 C6 0.0329(12) 0.0290(13) 0.0335(14) -0.0117(11) 0.0109(10) -0.0004(10)
 C7 0.0177(9) 0.0192(11) 0.0229(11) -0.0054(8) -0.0036(8) 0.0004(8)
 C8 0.0218(10) 0.0270(12) 0.0240(12) -0.0095(9) -0.0038(8) 0.0011(8)
 C9 0.0257(11) 0.0307(13) 0.0371(14) -0.0155(11) -0.0121(10) 0.0000(9)
 C10 0.0212(11) 0.0236(12) 0.0432(15) -0.0055(10) -0.0055(10) -0.0047(9)
 C11 0.0221(11) 0.0342(13) 0.0292(13) -0.0004(10) 0.0003(9) -0.0056(9)
 C12 0.0214(10) 0.0322(13) 0.0211(11) -0.0038(9) -0.0026(8) -0.0038(9)
 C13 0.0170(9) 0.0262(12) 0.0190(11) -0.0058(9) -0.0008(8) 0.0008(8)
 C14 0.0232(11) 0.0317(13) 0.0269(12) -0.0038(10) -0.0044(9) -0.0063(9)
 C15 0.0239(11) 0.0490(16) 0.0277(13) -0.0071(11) -0.0075(9) -0.0084(10)
 C16 0.0226(11) 0.0465(15) 0.0226(12) -0.0018(11) -0.0064(9) 0.0036(10)
 C17 0.0265(11) 0.0312(13) 0.0266(12) -0.0023(10) -0.0038(9) 0.0041(9)
 C18 0.0234(10) 0.0239(12) 0.0244(12) -0.0040(9) -0.0031(9) -0.0006(8)
 C19 0.0201(10) 0.0254(11) 0.0203(11) -0.0060(9) -0.0016(8) 0.0011(8)
 C20 0.0302(11) 0.0262(12) 0.0286(13) -0.0110(10) -0.0038(9) 0.0057(9)
 C21 0.0213(11) 0.0403(14) 0.0305(13) -0.0107(11) 0.0076(9) -0.0046(10)
 P1 0.0153(2) 0.0191(3) 0.0180(3) -0.0045(2) -0.00113(19) -0.00017(19)
 C31 0.0168(9) 0.0275(12) 0.0193(11) -0.0043(9) -0.0010(8) 0.0017(8)
 C32 0.0234(11) 0.0295(13) 0.0268(12) -0.0038(10) -0.0021(9) 0.0029(9)
 C33 0.0287(12) 0.0384(15) 0.0288(13) 0.0051(11) -0.0016(10) 0.0100(10)
 C34 0.0246(11) 0.0622(18) 0.0207(12) -0.0022(12) -0.0069(9) 0.0096(11)
 C35 0.0254(11) 0.0530(17) 0.0265(13) -0.0101(12) -0.0081(10) -0.0041(11)
 C36 0.0225(11) 0.0352(13) 0.0265(12) -0.0043(10) -0.0047(9) -0.0034(9)
 C37 0.0154(9) 0.0221(11) 0.0245(11) -0.0060(9) -0.0040(8) -0.0007(8)
 C38 0.0276(11) 0.0243(12) 0.0306(13) -0.0074(10) -0.0110(9) -0.0010(9)
 C39 0.0305(12) 0.0237(12) 0.0461(15) -0.0007(11) -0.0195(11) -0.0023(9)
 C40 0.0198(11) 0.0227(12) 0.0633(18) -0.0162(12) -0.0096(11) 0.0009(9)
 C41 0.0217(11) 0.0343(14) 0.0499(16) -0.0221(12) 0.0060(10) -0.0014(10)
 C42 0.0241(11) 0.0280(12) 0.0291(13) -0.0107(10) 0.0027(9) -0.0020(9)
 C43 0.0165(9) 0.0173(10) 0.0244(11) -0.0044(8) -0.0025(8) 0.0009(8)
 C44 0.0220(10) 0.0254(12) 0.0242(12) -0.0088(9) -0.0034(8) -0.0004(8)
 C45 0.0242(11) 0.0307(13) 0.0321(13) -0.0121(10) -0.0081(9) -0.0001(9)
 C46 0.0203(10) 0.0275(13) 0.0428(15) -0.0067(11) -0.0061(10) -0.0043(9)
 C47 0.0204(10) 0.0309(13) 0.0296(13) -0.0012(10) 0.0015(9) -0.0035(9)
 C48 0.0203(10) 0.0275(12) 0.0218(11) -0.0052(9) -0.0014(8) -0.0013(8)
 C49 0.0179(9) 0.0269(12) 0.0209(11) -0.0080(9) 0.0004(8) 0.0010(8)
 C50 0.0226(11) 0.0407(14) 0.0290(13) -0.0101(11) 0.0054(9) -0.0056(10)
 C51 0.0244(11) 0.0334(13) 0.0302(13) -0.0141(10) -0.0025(9) 0.0057(9)
 P31 0.0151(2) 0.0203(3) 0.0174(3) -0.0048(2) -0.00197(19) 0.00030(19)
 O61 0.0223(7) 0.0316(9) 0.0299(9) -0.0093(7) -0.0057(6) -0.0068(7)
 O62 0.0186(7) 0.0380(10) 0.0308(9) -0.0133(7) -0.0039(6) 0.0019(7)
 O63 0.0210(7) 0.0259(8) 0.0275(9) -0.0060(7) -0.0073(6) -0.0038(6)
 O64 0.0608(14) 0.0693(16) 0.0483(14) -0.0033(12) -0.0079(11) 0.0171(12)
 O65 0.0375(11) 0.0600(14) 0.0806(17) -0.0289(13) -0.0244(11) 0.0161(9)
 O66 0.0572(13) 0.0392(11) 0.0491(13) -0.0142(9) -0.0155(10) 0.0083(9)
 O67 0.0171(7) 0.0394(10) 0.0305(9) -0.0149(7) -0.0042(6) 0.0031(7)

_geom_special_details
;
 All esds (except the esd in the dihedral angle between two l.s. planes)
 are estimated using the full covariance matrix.  The cell esds are taken
 into account individually in the estimation of esds in distances, angles
 and torsion angles; correlations between esds in cell parameters are only
 used when they are defined by crystal symmetry.  An approximate (isotropic)
 treatment of cell esds is used for estimating esds involving l.s. planes.
;
loop_
  _geom_bond_atom_site_label_1
  _geom_bond_atom_site_label_2
  _geom_bond_distance
  _geom_bond_site_symmetry_2
  _geom_bond_publ_flag
 B1 O1 1.480(3) . ?
 B1 O3 1.463(3) . ?
 B1 O4 1.482(3) . ?
 B1 O6 1.467(3) . ?
 B2 O1 1.356(3) . ?
 B2 O2 1.374(3) . ?
 B2 O7 1.372(3) . ?
 B3 O2 1.401(3) . ?
 B3 O3 1.357(3) . ?
 B3 O8 1.352(3) . ?
 B4 O4 1.354(3) . ?
 B4 O5 1.393(3) . ?
 B4 O9 1.364(3) . ?
 B5 O5 1.393(3) . ?
 B5 O6 1.344(3) . ?
 B5 O10 1.364(3) . ?
 O7 H7 0.8400 . ?
 O8 H8A 0.8400 . ?
 O9 H9A 0.8400 . ?
 O10 H10A 0.8400 . ?
 B11 O11 1.487(3) . ?
 B11 O13 1.461(3) . ?
 B11 O14 1.485(3) . ?
 B11 O16 1.455(3) . ?
 B12 O11 1.354(2) . ?
 B12 O12 1.390(3) . ?
 B12 O17 1.365(3) . ?
 B13 O12 1.395(3) . ?
 B13 O13 1.350(3) . ?
 B13 O18 1.358(3) . ?
 B14 O14 1.358(3) . ?
 B14 O15 1.372(3) . ?
 B14 O19 1.376(3) . ?
 B15 O15 1.395(3) . ?
 B15 O16 1.348(3) . ?
 B15 O20 1.369(3) . ?
 O17 H17A 0.8400 . ?
 O18 H18A 0.8400 . ?
 O19 H19A 0.8400 . ?
 O20 H20 0.8400 . ?
 C1 C2 1.396(3) . ?
 C1 C6 1.392(3) . ?
 C1 P1 1.796(2) . ?
 C2 H2 0.9500 . ?
 C2 C3 1.388(3) . ?
 C3 H3 0.9500 . ?
 C3 C4 1.383(4) . ?
 C4 H4 0.9500 . ?
 C4 C5 1.369(4) . ?
 C5 H5 0.9500 . ?
 C5 C6 1.386(3) . ?
 C6 H6 0.9500 . ?
 C7 C8 1.402(3) . ?
 C7 C12 1.397(3) . ?
 C7 P1 1.802(2) . ?
 C8 H8 0.9500 . ?
 C8 C9 1.391(3) . ?
 C9 H9 0.9500 . ?
 C9 C10 1.386(3) . ?
 C10 H10 0.9500 . ?
 C10 C11 1.387(3) . ?
 C11 H11 0.9500 . ?
 C11 C12 1.389(3) . ?
 C12 H12 0.9500 . ?
 C13 C14 1.398(3) . ?
 C13 C18 1.402(3) . ?
 C13 P1 1.795(2) . ?
 C14 H14 0.9500 . ?
 C14 C15 1.387(3) . ?
 C15 H15 0.9500 . ?
 C15 C16 1.387(4) . ?
 C16 H16 0.9500 . ?
 C16 C17 1.383(3) . ?
 C17 H17 0.9500 . ?
 C17 C18 1.385(3) . ?
 C18 H18 0.9500 . ?
 C19 H19 1.0000 . ?
 C19 C20 1.534(3) . ?
 C19 C21 1.537(3) . ?
 C19 P1 1.821(2) . ?
 C20 H20A 0.9800 . ?
 C20 H20B 0.9800 . ?
 C20 H20C 0.9800 . ?
 C21 H21A 0.9800 . ?
 C21 H21B 0.9800 . ?
 C21 H21C 0.9800 . ?
 C31 C32 1.394(3) . ?
 C31 C36 1.396(3) . ?
 C31 P31 1.798(2) . ?
 C32 H32 0.9500 . ?
 C32 C33 1.388(3) . ?
 C33 H33 0.9500 . ?
 C33 C34 1.388(4) . ?
 C34 H34 0.9500 . ?
 C34 C35 1.380(4) . ?
 C35 H35 0.9500 . ?
 C35 C36 1.387(3) . ?
 C36 H36 0.9500 . ?
 C37 C38 1.396(3) . ?
 C37 C42 1.401(3) . ?
 C37 P31 1.795(2) . ?
 C38 H38 0.9500 . ?
 C38 C39 1.384(3) . ?
 C39 H39 0.9500 . ?
 C39 C40 1.383(4) . ?
 C40 H40 0.9500 . ?
 C40 C41 1.381(4) . ?
 C41 H41 0.9500 . ?
 C41 C42 1.384(3) . ?
 C42 H42 0.9500 . ?
 C43 C44 1.405(3) . ?
 C43 C48 1.395(3) . ?
 C43 P31 1.798(2) . ?
 C44 H44 0.9500 . ?
 C44 C45 1.390(3) . ?
 C45 H45 0.9500 . ?
 C45 C46 1.384(3) . ?
 C46 H46 0.9500 . ?
 C46 C47 1.389(3) . ?
 C47 H47 0.9500 . ?
 C47 C48 1.390(3) . ?
 C48 H48 0.9500 . ?
 C49 H49 1.0000 . ?
 C49 C50 1.535(3) . ?
 C49 C51 1.535(3) . ?
 C49 P31 1.822(2) . ?
 C50 H50A 0.9800 . ?
 C50 H50B 0.9800 . ?
 C50 H50C 0.9800 . ?
 C51 H51A 0.9800 . ?
 C51 H51B 0.9800 . ?
 C51 H51C 0.9800 . ?
 O61 H61A 0.8697 . ?
 O61 H61B 0.8698 . ?
 O62 H62A 0.8698 . ?
 O62 H62B 0.8694 . ?
 O63 H63A 0.8698 . ?
 O63 H63B 0.8701 . ?
 O64 H64A 0.8701 . ?
 O64 H64B 0.8699 . ?
 O65 H65A 0.8701 . ?
 O65 H65B 0.8698 . ?
 O66 H66A 0.8702 . ?
 O66 H66B 0.8699 . ?
 O67 H67A 0.8701 . ?
 O67 H67B 0.8698 . ?

loop_
  _geom_angle_atom_site_label_1
  _geom_angle_atom_site_label_2
  _geom_angle_atom_site_label_3
  _geom_angle
  _geom_angle_site_symmetry_1
  _geom_angle_site_symmetry_3
  _geom_angle_publ_flag
 O1 B1 O4 107.16(17) . . ?
 O3 B1 O1 110.41(16) . . ?
 O3 B1 O4 109.53(19) . . ?
 O3 B1 O6 109.04(18) . . ?
 O6 B1 O1 109.58(19) . . ?
 O6 B1 O4 111.10(16) . . ?
 O1 B2 O2 122.0(2) . . ?
 O1 B2 O7 121.4(2) . . ?
 O7 B2 O2 116.67(18) . . ?
 O3 B3 O2 120.4(2) . . ?
 O8 B3 O2 120.97(19) . . ?
 O8 B3 O3 118.7(2) . . ?
 O4 B4 O5 120.91(19) . . ?
 O4 B4 O9 120.53(19) . . ?
 O9 B4 O5 118.55(18) . . ?
 O6 B5 O5 121.48(19) . . ?
 O6 B5 O10 120.15(19) . . ?
 O10 B5 O5 118.36(18) . . ?
 B2 O1 B1 122.38(18) . . ?
 B2 O2 B3 118.55(17) . . ?
 B3 O3 B1 123.39(18) . . ?
 B4 O4 B1 123.04(16) . . ?
 B4 O5 B5 118.87(16) . . ?
 B5 O6 B1 122.94(17) . . ?
 B2 O7 H7 109.5 . . ?
 B3 O8 H8A 109.5 . . ?
 B4 O9 H9A 109.5 . . ?
 B5 O10 H10A 109.5 . . ?
 O13 B11 O11 111.19(16) . . ?
 O13 B11 O14 108.68(18) . . ?
 O14 B11 O11 106.24(17) . . ?
 O16 B11 O11 109.48(18) . . ?
 O16 B11 O13 110.15(18) . . ?
 O16 B11 O14 111.03(16) . . ?
 O11 B12 O12 121.15(19) . . ?
 O11 B12 O17 120.38(19) . . ?
 O17 B12 O12 118.46(18) . . ?
 O13 B13 O12 121.1(2) . . ?
 O13 B13 O18 119.9(2) . . ?
 O18 B13 O12 118.99(18) . . ?
 O14 B14 O15 121.9(2) . . ?
 O14 B14 O19 120.7(2) . . ?
 O15 B14 O19 117.38(18) . . ?
 O16 B15 O15 121.6(2) . . ?
 O16 B15 O20 122.2(2) . . ?
 O20 B15 O15 116.21(19) . . ?
 B12 O11 B11 122.58(16) . . ?
 B12 O12 B13 119.02(16) . . ?
 B13 O13 B11 122.97(17) . . ?
 B14 O14 B11 122.21(18) . . ?
 B14 O15 B15 118.40(17) . . ?
 B15 O16 B11 123.18(18) . . ?
 B12 O17 H17A 109.5 . . ?
 B13 O18 H18A 109.5 . . ?
 B14 O19 H19A 109.5 . . ?
 B15 O20 H20 109.5 . . ?
 C2 C1 P1 120.05(16) . . ?
 C6 C1 C2 120.4(2) . . ?
 C6 C1 P1 119.37(17) . . ?
 C1 C2 H2 120.5 . . ?
 C3 C2 C1 119.0(2) . . ?
 C3 C2 H2 120.5 . . ?
 C2 C3 H3 119.9 . . ?
 C4 C3 C2 120.2(2) . . ?
 C4 C3 H3 119.9 . . ?
 C3 C4 H4 119.7 . . ?
 C5 C4 C3 120.6(2) . . ?
 C5 C4 H4 119.7 . . ?
 C4 C5 H5 119.8 . . ?
 C4 C5 C6 120.4(2) . . ?
 C6 C5 H5 119.8 . . ?
 C1 C6 H6 120.3 . . ?
 C5 C6 C1 119.3(2) . . ?
 C5 C6 H6 120.3 . . ?
 C8 C7 P1 120.97(16) . . ?
 C12 C7 C8 120.37(19) . . ?
 C12 C7 P1 118.47(15) . . ?
 C7 C8 H8 120.4 . . ?
 C9 C8 C7 119.3(2) . . ?
 C9 C8 H8 120.4 . . ?
 C8 C9 H9 120.0 . . ?
 C10 C9 C8 120.1(2) . . ?
 C10 C9 H9 120.0 . . ?
 C9 C10 H10 119.7 . . ?
 C9 C10 C11 120.7(2) . . ?
 C11 C10 H10 119.7 . . ?
 C10 C11 H11 120.0 . . ?
 C10 C11 C12 120.0(2) . . ?
 C12 C11 H11 120.0 . . ?
 C7 C12 H12 120.2 . . ?
 C11 C12 C7 119.6(2) . . ?
 C11 C12 H12 120.2 . . ?
 C14 C13 C18 119.6(2) . . ?
 C14 C13 P1 120.80(17) . . ?
 C18 C13 P1 119.48(16) . . ?
 C13 C14 H14 120.1 . . ?
 C15 C14 C13 119.8(2) . . ?
 C15 C14 H14 120.1 . . ?
 C14 C15 H15 119.9 . . ?
 C16 C15 C14 120.3(2) . . ?
 C16 C15 H15 119.9 . . ?
 C15 C16 H16 120.0 . . ?
 C17 C16 C15 120.1(2) . . ?
 C17 C16 H16 120.0 . . ?
 C16 C17 H17 119.8 . . ?
 C16 C17 C18 120.5(2) . . ?
 C18 C17 H17 119.8 . . ?
 C13 C18 H18 120.1 . . ?
 C17 C18 C13 119.7(2) . . ?
 C17 C18 H18 120.1 . . ?
 C20 C19 H19 108.6 . . ?
 C20 C19 C21 110.60(17) . . ?
 C20 C19 P1 110.42(15) . . ?
 C21 C19 H19 108.6 . . ?
 C21 C19 P1 110.08(15) . . ?
 P1 C19 H19 108.6 . . ?
 C19 C20 H20A 109.5 . . ?
 C19 C20 H20B 109.5 . . ?
 C19 C20 H20C 109.5 . . ?
 H20A C20 H20B 109.5 . . ?
 H20A C20 H20C 109.5 . . ?
 H20B C20 H20C 109.5 . . ?
 C19 C21 H21A 109.5 . . ?
 C19 C21 H21B 109.5 . . ?
 C19 C21 H21C 109.5 . . ?
 H21A C21 H21B 109.5 . . ?
 H21A C21 H21C 109.5 . . ?
 H21B C21 H21C 109.5 . . ?
 C1 P1 C7 108.96(9) . . ?
 C1 P1 C19 109.87(10) . . ?
 C7 P1 C19 111.31(10) . . ?
 C13 P1 C1 109.89(10) . . ?
 C13 P1 C7 108.13(10) . . ?
 C13 P1 C19 108.65(9) . . ?
 C32 C31 C36 119.5(2) . . ?
 C32 C31 P31 120.34(16) . . ?
 C36 C31 P31 120.07(17) . . ?
 C31 C32 H32 120.0 . . ?
 C33 C32 C31 119.9(2) . . ?
 C33 C32 H32 120.0 . . ?
 C32 C33 H33 120.0 . . ?
 C32 C33 C34 120.0(2) . . ?
 C34 C33 H33 120.0 . . ?
 C33 C34 H34 119.8 . . ?
 C35 C34 C33 120.3(2) . . ?
 C35 C34 H34 119.8 . . ?
 C34 C35 H35 120.0 . . ?
 C34 C35 C36 120.0(2) . . ?
 C36 C35 H35 120.0 . . ?
 C31 C36 H36 119.9 . . ?
 C35 C36 C31 120.2(2) . . ?
 C35 C36 H36 119.9 . . ?
 C38 C37 C42 120.2(2) . . ?
 C38 C37 P31 120.44(16) . . ?
 C42 C37 P31 119.08(17) . . ?
 C37 C38 H38 120.3 . . ?
 C39 C38 C37 119.4(2) . . ?
 C39 C38 H38 120.3 . . ?
 C38 C39 H39 119.8 . . ?
 C40 C39 C38 120.3(2) . . ?
 C40 C39 H39 119.8 . . ?
 C39 C40 H40 119.8 . . ?
 C41 C40 C39 120.5(2) . . ?
 C41 C40 H40 119.8 . . ?
 C40 C41 H41 119.9 . . ?
 C40 C41 C42 120.3(2) . . ?
 C42 C41 H41 119.9 . . ?
 C37 C42 H42 120.3 . . ?
 C41 C42 C37 119.4(2) . . ?
 C41 C42 H42 120.3 . . ?
 C44 C43 P31 121.06(16) . . ?
 C48 C43 C44 120.14(19) . . ?
 C48 C43 P31 118.49(15) . . ?
 C43 C44 H44 120.4 . . ?
 C45 C44 C43 119.2(2) . . ?
 C45 C44 H44 120.4 . . ?
 C44 C45 H45 119.8 . . ?
 C46 C45 C44 120.4(2) . . ?
 C46 C45 H45 119.8 . . ?
 C45 C46 H46 119.8 . . ?
 C45 C46 C47 120.4(2) . . ?
 C47 C46 H46 119.8 . . ?
 C46 C47 H47 120.0 . . ?
 C46 C47 C48 120.0(2) . . ?
 C48 C47 H47 120.0 . . ?
 C43 C48 H48 120.1 . . ?
 C47 C48 C43 119.8(2) . . ?
 C47 C48 H48 120.1 . . ?
 C50 C49 H49 108.6 . . ?
 C50 C49 C51 110.61(17) . . ?
 C50 C49 P31 110.30(15) . . ?
 C51 C49 H49 108.6 . . ?
 C51 C49 P31 110.12(15) . . ?
 P31 C49 H49 108.6 . . ?
 C49 C50 H50A 109.5 . . ?
 C49 C50 H50B 109.5 . . ?
 C49 C50 H50C 109.5 . . ?
 H50A C50 H50B 109.5 . . ?
 H50A C50 H50C 109.5 . . ?
 H50B C50 H50C 109.5 . . ?
 C49 C51 H51A 109.5 . . ?
 C49 C51 H51B 109.5 . . ?
 C49 C51 H51C 109.5 . . ?
 H51A C51 H51B 109.5 . . ?
 H51A C51 H51C 109.5 . . ?
 H51B C51 H51C 109.5 . . ?
 C31 P31 C43 109.40(10) . . ?
 C31 P31 C49 108.88(9) . . ?
 C37 P31 C31 108.97(10) . . ?
 C37 P31 C43 107.84(9) . . ?
 C37 P31 C49 110.84(10) . . ?
 C43 P31 C49 110.87(10) . . ?
 H61A O61 H61B 104.5 . . ?
 H62A O62 H62B 104.6 . . ?
 H63A O63 H63B 104.5 . . ?
 H64A O64 H64B 104.5 . . ?
 H65A O65 H65B 104.5 . . ?
 H66A O66 H66B 104.5 . . ?
 H67A O67 H67B 104.5 . . ?

loop_
  _geom_hbond_atom_site_label_D
  _geom_hbond_atom_site_label_H
  _geom_hbond_atom_site_label_A
  _geom_hbond_distance_DH
  _geom_hbond_distance_HA
  _geom_hbond_distance_DA
  _geom_hbond_angle_DHA
  _geom_hbond_site_symmetry_A
  _geom_hbond_publ_flag
 O7 H7 O62 0.84 1.87 2.695(2) 168.1 2_665 yes
 O8 H8A O20 0.84 1.87 2.685(2) 161.9 2_675 yes
 O9 H9A O63 0.84 2.07 2.874(2) 160.8 2_565 yes
 O10 H10A O7 0.84 1.90 2.734(2) 170.9 1_455 yes
 O17 H17A O61 0.84 2.06 2.871(2) 162.3 . yes
 O18 H18A O19 0.84 1.87 2.703(2) 171.4 1_455 yes
 O20 H20 O66 0.84 1.88 2.703(3) 166.8 2_675 yes
 O61 H61A O12 0.87 2.18 2.8776(19) 136.7 . yes
 O61 H61B O1 0.87 1.85 2.711(2) 170.1 2_565 yes
 O62 H62A O11 0.87 1.93 2.788(2) 167.8 . yes
 O62 H62B O61 0.87 2.04 2.840(2) 153.2 1_655 yes
 O63 H63A O14 0.87 1.84 2.698(2) 169.7 . yes
 O63 H63B O5 0.87 2.21 2.8865(19) 134.5 2_565 yes
 O64 H64A O8 0.87 2.15 2.829(3) 134.4 . yes
 O64 H64B O18 0.87 2.07 2.936(3) 176.2 2_575 yes
 O65 H65A O64 0.87 1.87 2.714(3) 162.9 . yes
 O65 H65B O3 0.87 1.94 2.797(2) 170.8 . yes
 O66 H66A O65 0.87 1.81 2.679(3) 173.0 1_655 yes
 O66 H66B O10 0.87 2.27 3.069(3) 151.8 1_655 yes
 O67 H67A O4 0.87 1.91 2.777(2) 171.9 . yes
 O67 H67B O63 0.87 2.05 2.856(2) 153.6 2_665 yes

loop_
  _geom_torsion_atom_site_label_1
  _geom_torsion_atom_site_label_2
  _geom_torsion_atom_site_label_3
  _geom_torsion_atom_site_label_4
  _geom_torsion
  _geom_torsion_site_symmetry_1
  _geom_torsion_site_symmetry_2
  _geom_torsion_site_symmetry_3
  _geom_torsion_site_symmetry_4
  _geom_torsion_publ_flag
 O1 B1 O3 B3 -19.0(3) . . . . ?
 O1 B1 O4 B4 131.12(19) . . . . ?
 O1 B1 O6 B5 -133.5(2) . . . . ?
 O1 B2 O2 B3 -8.7(3) . . . . ?
 O2 B2 O1 B1 -2.5(3) . . . . ?
 O2 B3 O3 B1 9.7(3) . . . . ?
 O3 B1 O1 B2 15.3(3) . . . . ?
 O3 B1 O4 B4 -109.1(2) . . . . ?
 O3 B1 O6 B5 105.5(2) . . . . ?
 O3 B3 O2 B2 5.2(3) . . . . ?
 O4 B1 O1 B2 134.55(19) . . . . ?
 O4 B1 O3 B3 -136.7(2) . . . . ?
 O4 B1 O6 B5 -15.3(3) . . . . ?
 O4 B4 O5 B5 -3.6(3) . . . . ?
 O5 B4 O4 B1 -2.8(3) . . . . ?
 O5 B5 O6 B1 10.5(4) . . . . ?
 O6 B1 O1 B2 -104.8(2) . . . . ?
 O6 B1 O3 B3 101.5(2) . . . . ?
 O6 B1 O4 B4 11.4(3) . . . . ?
 O6 B5 O5 B4 -0.2(3) . . . . ?
 O7 B2 O1 B1 178.25(19) . . . . ?
 O7 B2 O2 B3 170.57(19) . . . . ?
 O8 B3 O2 B2 -175.0(2) . . . . ?
 O8 B3 O3 B1 -170.1(2) . . . . ?
 O9 B4 O4 B1 177.0(2) . . . . ?
 O9 B4 O5 B5 176.6(2) . . . . ?
 O10 B5 O5 B4 178.8(2) . . . . ?
 O10 B5 O6 B1 -168.4(2) . . . . ?
 O11 B11 O13 B13 -16.7(3) . . . . ?
 O11 B11 O14 B14 132.28(19) . . . . ?
 O11 B11 O16 B15 -131.3(2) . . . . ?
 O11 B12 O12 B13 -4.3(3) . . . . ?
 O12 B12 O11 B11 -3.0(3) . . . . ?
 O12 B13 O13 B11 11.1(3) . . . . ?
 O13 B11 O11 B12 12.6(3) . . . . ?
 O13 B11 O14 B14 -108.0(2) . . . . ?
 O13 B11 O16 B15 106.2(2) . . . . ?
 O13 B13 O12 B12 0.4(3) . . . . ?
 O14 B11 O11 B12 130.70(19) . . . . ?
 O14 B11 O13 B13 -133.3(2) . . . . ?
 O14 B11 O16 B15 -14.3(3) . . . . ?
 O14 B14 O15 B15 -4.6(3) . . . . ?
 O15 B14 O14 B11 -4.7(3) . . . . ?
 O15 B15 O16 B11 6.6(3) . . . . ?
 O16 B11 O11 B12 -109.3(2) . . . . ?
 O16 B11 O13 B13 104.9(2) . . . . ?
 O16 B11 O14 B14 13.3(3) . . . . ?
 O16 B15 O15 B14 3.8(3) . . . . ?
 O17 B12 O11 B11 176.84(19) . . . . ?
 O17 B12 O12 B13 175.9(2) . . . . ?
 O18 B13 O12 B12 179.2(2) . . . . ?
 O18 B13 O13 B11 -167.8(2) . . . . ?
 O19 B14 O14 B11 176.54(19) . . . . ?
 O19 B14 O15 B15 174.25(19) . . . . ?
 O20 B15 O15 B14 -175.23(19) . . . . ?
 O20 B15 O16 B11 -174.5(2) . . . . ?
 C1 C2 C3 C4 0.7(3) . . . . ?
 C2 C1 C6 C5 -1.6(3) . . . . ?
 C2 C1 P1 C7 -96.67(18) . . . . ?
 C2 C1 P1 C13 145.03(16) . . . . ?
 C2 C1 P1 C19 25.53(19) . . . . ?
 C2 C3 C4 C5 -1.4(3) . . . . ?
 C3 C4 C5 C6 0.7(4) . . . . ?
 C4 C5 C6 C1 0.8(4) . . . . ?
 C6 C1 C2 C3 0.8(3) . . . . ?
 C6 C1 P1 C7 78.79(19) . . . . ?
 C6 C1 P1 C13 -39.51(19) . . . . ?
 C6 C1 P1 C19 -159.01(17) . . . . ?
 C7 C8 C9 C10 -0.1(3) . . . . ?
 C8 C7 C12 C11 0.2(3) . . . . ?
 C8 C7 P1 C1 92.88(19) . . . . ?
 C8 C7 P1 C13 -147.71(17) . . . . ?
 C8 C7 P1 C19 -28.4(2) . . . . ?
 C8 C9 C10 C11 0.0(3) . . . . ?
 C9 C10 C11 C12 0.2(4) . . . . ?
 C10 C11 C12 C7 -0.3(3) . . . . ?
 C12 C7 C8 C9 0.1(3) . . . . ?
 C12 C7 P1 C1 -82.12(18) . . . . ?
 C12 C7 P1 C13 37.29(19) . . . . ?
 C12 C7 P1 C19 156.56(16) . . . . ?
 C13 C14 C15 C16 1.2(4) . . . . ?
 C14 C13 C18 C17 0.6(3) . . . . ?
 C14 C13 P1 C1 -27.9(2) . . . . ?
 C14 C13 P1 C7 -146.74(17) . . . . ?
 C14 C13 P1 C19 92.32(19) . . . . ?
 C14 C15 C16 C17 0.6(4) . . . . ?
 C15 C16 C17 C18 -1.8(4) . . . . ?
 C16 C17 C18 C13 1.2(3) . . . . ?
 C18 C13 C14 C15 -1.8(3) . . . . ?
 C18 C13 P1 C1 155.49(16) . . . . ?
 C18 C13 P1 C7 36.67(19) . . . . ?
 C18 C13 P1 C19 -84.27(18) . . . . ?
 C20 C19 P1 C1 -178.79(14) . . . . ?
 C20 C19 P1 C7 -58.00(17) . . . . ?
 C20 C19 P1 C13 60.95(17) . . . . ?
 C21 C19 P1 C1 58.82(17) . . . . ?
 C21 C19 P1 C7 179.61(15) . . . . ?
 C21 C19 P1 C13 -61.44(18) . . . . ?
 P1 C1 C2 C3 176.25(16) . . . . ?
 P1 C1 C6 C5 -177.04(18) . . . . ?
 P1 C7 C8 C9 -174.84(16) . . . . ?
 P1 C7 C12 C11 175.19(17) . . . . ?
 P1 C13 C14 C15 -178.35(17) . . . . ?
 P1 C13 C18 C17 177.20(16) . . . . ?
 C31 C32 C33 C34 -0.5(3) . . . . ?
 C32 C31 C36 C35 1.7(3) . . . . ?
 C32 C31 P31 C37 -152.52(17) . . . . ?
 C32 C31 P31 C43 -34.8(2) . . . . ?
 C32 C31 P31 C49 86.47(19) . . . . ?
 C32 C33 C34 C35 1.1(4) . . . . ?
 C33 C34 C35 C36 -0.4(4) . . . . ?
 C34 C35 C36 C31 -1.0(4) . . . . ?
 C36 C31 C32 C33 -0.9(3) . . . . ?
 C36 C31 P31 C37 30.7(2) . . . . ?
 C36 C31 P31 C43 148.35(17) . . . . ?
 C36 C31 P31 C49 -90.34(19) . . . . ?
 C37 C38 C39 C40 -0.5(3) . . . . ?
 C38 C37 C42 C41 1.3(3) . . . . ?
 C38 C37 P31 C31 -146.52(16) . . . . ?
 C38 C37 P31 C43 94.81(18) . . . . ?
 C38 C37 P31 C49 -26.73(19) . . . . ?
 C38 C39 C40 C41 0.6(3) . . . . ?
 C39 C40 C41 C42 0.3(3) . . . . ?
 C40 C41 C42 C37 -1.2(3) . . . . ?
 C42 C37 C38 C39 -0.4(3) . . . . ?
 C42 C37 P31 C31 39.81(19) . . . . ?
 C42 C37 P31 C43 -78.85(18) . . . . ?
 C42 C37 P31 C49 159.61(16) . . . . ?
 C43 C44 C45 C46 0.0(3) . . . . ?
 C44 C43 C48 C47 -0.5(3) . . . . ?
 C44 C43 P31 C31 147.61(17) . . . . ?
 C44 C43 P31 C37 -94.01(18) . . . . ?
 C44 C43 P31 C49 27.5(2) . . . . ?
 C44 C45 C46 C47 -0.2(3) . . . . ?
 C45 C46 C47 C48 0.0(3) . . . . ?
 C46 C47 C48 C43 0.4(3) . . . . ?
 C48 C43 C44 C45 0.3(3) . . . . ?
 C48 C43 P31 C31 -38.77(19) . . . . ?
 C48 C43 P31 C37 79.61(18) . . . . ?
 C48 C43 P31 C49 -158.87(16) . . . . ?
 C50 C49 P31 C31 61.19(18) . . . . ?
 C50 C49 P31 C37 -58.66(17) . . . . ?
 C50 C49 P31 C43 -178.40(15) . . . . ?
 C51 C49 P31 C31 -61.17(16) . . . . ?
 C51 C49 P31 C37 178.98(14) . . . . ?
 C51 C49 P31 C43 59.24(16) . . . . ?
 P31 C31 C32 C33 -177.73(17) . . . . ?
 P31 C31 C36 C35 178.48(17) . . . . ?
 P31 C37 C38 C39 -173.99(16) . . . . ?
 P31 C37 C42 C41 174.97(16) . . . . ?
 P31 C43 C44 C45 173.84(16) . . . . ?
 P31 C43 C48 C47 -174.22(17) . . . . ?

_shelx_res_file
;
TITL 2010src0454b in P-1
    2010src0454b.res
    created by SHELXL-2018/3 at 11:59:16 on 29-Aug-2023
CELL 0.71073 9.181 13.4812 23.8357 75.313 83.095 86.919
ZERR 4 0.0003 0.0005 0.0008 0.001 0.002 0.002
LATT 1
SFAC C H B O P
UNIT 84 132 20 54 4
EQIV $1 -1+X,+Y,+Z
EQIV $2 1+X,+Y,+Z
EQIV $3 -X,2-Y,-Z
EQIV $4 1-X,1-Y,-Z
EQIV $5 1-X,2-Y,-Z
EQIV $6 -X,1-Y,-Z
DFIX 2.2 H66b O10_$2

L.S. 25
PLAN  2
SIZE 0.12 0.18 0.26
TEMP -153(2)
HTAB O7 O62_$4
HTAB O8 O20_$5
HTAB O9 O63_$6
HTAB O10 O7_$1
HTAB O17 O61
HTAB O18 O19_$1
HTAB O20 O66_$5
HTAB O61 O12
HTAB O61 O1_$6
HTAB O62 O11
HTAB O62 O61_$2
HTAB O63 O14
HTAB O63 O5_$6
HTAB O64 O18_$3
HTAB O64 O8
HTAB O65 O3
HTAB O65 O64
HTAB O66 O10_$2
HTAB O66 O65_$2
HTAB O67 O4
HTAB O67 O63_$4
CONF
HTAB
BOND $H
MORE -1
fmap 2
acta
MERG 2
OMIT -2 -1 1
OMIT -2 1 5
OMIT -1 1 6
OMIT -1 3 2
OMIT 0 -3 1
OMIT 0 1 7
OMIT 1 -3 2
OMIT 1 -1 4
OMIT 3 2 3
REM <olex2.extras>
REM <HklSrc "%.\\2010src0454b.hkl">
REM </olex2.extras>

WGHT    0.075000    1.502100
FVAR       0.49878
B1    3   -0.002111    0.449186    0.258286    11.00000    0.01190    0.03390 =
         0.02809   -0.01207   -0.00163   -0.00272
B2    3    0.242595    0.432132    0.294933    11.00000    0.01414    0.03430 =
         0.01768   -0.00911    0.00215   -0.00564
B3    3    0.153355    0.598903    0.249031    11.00000    0.01526    0.03278 =
         0.03256   -0.01341   -0.00276    0.00015
B4    3   -0.178439    0.381932    0.205973    11.00000    0.01531    0.02361 =
         0.01989   -0.00474   -0.00272   -0.00095
B5    3   -0.263669    0.425113    0.296180    11.00000    0.01359    0.03640 =
         0.02514   -0.01313   -0.00203   -0.00482
O1    4    0.124032    0.388116    0.283341    11.00000    0.01364    0.03028 =
         0.02883   -0.00746   -0.00418   -0.00457
O2    4    0.255776    0.536771    0.282041    11.00000    0.01496    0.03196 =
         0.03278   -0.01042   -0.00420   -0.00522
O3    4    0.037344    0.556581    0.234264    11.00000    0.01574    0.02838 =
         0.04243   -0.01261   -0.00769   -0.00070
O4    4   -0.039839    0.405471    0.210926    11.00000    0.01292    0.03140 =
         0.02491   -0.01122   -0.00146   -0.00218
O5    4   -0.294021    0.393917    0.247461    11.00000    0.01231    0.03299 =
         0.02278   -0.01157   -0.00234   -0.00287
O6    4   -0.125973    0.443472    0.303912    11.00000    0.01337    0.05311 =
         0.02803   -0.02124   -0.00114   -0.00567
O7    4    0.356554    0.373874    0.319607    11.00000    0.01464    0.03310 =
         0.02808   -0.00767   -0.00399   -0.00519
AFIX 147
H7    2    0.337218    0.311426    0.326671    11.00000   -1.50000
AFIX   0
O8    4    0.167533    0.701756    0.231411    11.00000    0.02271    0.02937 =
         0.06078   -0.01377   -0.01191   -0.00212
AFIX 147
H8A   2    0.237550    0.718935    0.246310    11.00000   -1.50000
AFIX   0
O9    4   -0.207885    0.346285    0.159959    11.00000    0.01671    0.04198 =
         0.02651   -0.01493   -0.00345   -0.00235
AFIX 147
H9A   2   -0.298418    0.337148    0.162279    11.00000   -1.50000
AFIX   0
O10   4   -0.378051    0.438501    0.335970    11.00000    0.01498    0.07194 =
         0.03661   -0.03218    0.00201   -0.01163
AFIX 147
H10A  2   -0.454355    0.414610    0.328741    11.00000   -1.50000
AFIX   0

B11   3    0.457388    0.949392   -0.243259    11.00000    0.01402    0.02868 =
         0.02519   -0.01029   -0.00264   -0.00296
B12   3    0.283829    0.880657   -0.296058    11.00000    0.01608    0.02090 =
         0.01892   -0.00407   -0.00117   -0.00149
B13   3    0.198415    0.916028   -0.203772    11.00000    0.01492    0.03382 =
         0.02582   -0.01188   -0.00364   -0.00124
B14   3    0.706263    0.934103   -0.209887    11.00000    0.01412    0.03306 =
         0.01983   -0.00960    0.00062   -0.00483
B15   3    0.611155    1.099002   -0.254328    11.00000    0.01928    0.02759 =
         0.02773   -0.01146    0.00102   -0.00417
O11   4    0.421489    0.906966   -0.291646    11.00000    0.01270    0.02714 =
         0.02357   -0.00769   -0.00200   -0.00372
O12   4    0.168793    0.887781   -0.253561    11.00000    0.01294    0.03342 =
         0.02185   -0.01042   -0.00289   -0.00377
O13   4    0.336117    0.936905   -0.196550    11.00000    0.01431    0.04268 =
         0.02522   -0.01515   -0.00231   -0.00550
O14   4    0.586580    0.888941   -0.219902    11.00000    0.01441    0.02711 =
         0.03014   -0.00638   -0.00614   -0.00327
O15   4    0.719541    1.038642   -0.224585    11.00000    0.01763    0.03172 =
         0.03672   -0.01062   -0.00471   -0.00794
O16   4    0.491333    1.057348   -0.265767    11.00000    0.01983    0.02486 =
         0.03690   -0.00903   -0.00737   -0.00251
O17   4    0.255049    0.846639   -0.342795    11.00000    0.01591    0.04127 =
         0.02606   -0.01495   -0.00274   -0.00359
AFIX 147
H17A  2    0.166029    0.832037   -0.339073    11.00000   -1.50000
AFIX   0
O18   4    0.085764    0.924137   -0.162594    11.00000    0.01545    0.07824 =
         0.03513   -0.03312    0.00214   -0.01228
AFIX 147
H18A  2    0.008114    0.905102   -0.171659    11.00000   -1.50000
AFIX   0
O19   4    0.820800    0.875733   -0.185335    11.00000    0.01438    0.03634 =
         0.03254   -0.00959   -0.00591   -0.00470
AFIX 147
H19A  2    0.802487    0.813246   -0.179071    11.00000   -1.50000
AFIX   0
O20   4    0.634817    1.202243   -0.271910    11.00000    0.02730    0.02837 =
         0.04655   -0.01278   -0.00677   -0.00506
AFIX 147
H20   2    0.560084    1.232889   -0.285782    11.00000   -1.50000
AFIX   0

C1    1    0.243045    0.894930    0.003338    11.00000    0.01228    0.02260 =
         0.02671   -0.00625   -0.00275    0.00041
C2    1    0.245975    0.961027   -0.052290    11.00000    0.02813    0.02481 =
         0.03267   -0.00688   -0.01247    0.00045
AFIX  43
H2    2    0.273833    0.936084   -0.086001    11.00000   -1.20000
AFIX   0
C3    1    0.207603    1.063717   -0.057643    11.00000    0.03393    0.02226 =
         0.04940    0.00044   -0.02059   -0.00200
AFIX  43
H3    2    0.208106    1.109392   -0.095261    11.00000   -1.20000
AFIX   0
C4    1    0.168643    1.099756   -0.008397    11.00000    0.01768    0.02330 =
         0.06711   -0.01373   -0.00628    0.00203
AFIX  43
H4    2    0.144683    1.170461   -0.012393    11.00000   -1.20000
AFIX   0
C5    1    0.164285    1.034448    0.046079    11.00000    0.03476    0.03180 =
         0.05288   -0.01989    0.01245    0.00001
AFIX  43
H5    2    0.136342    1.060002    0.079572    11.00000   -1.20000
AFIX   0
C6    1    0.200384    0.931290    0.052669    11.00000    0.03289    0.02897 =
         0.03348   -0.01170    0.01089   -0.00039
AFIX  43
H6    2    0.196055    0.885866    0.090466    11.00000   -1.20000
AFIX   0
C7    1    0.110450    0.694603    0.022611    11.00000    0.01766    0.01920 =
         0.02294   -0.00540   -0.00359    0.00038
C8    1    0.048070    0.676199   -0.024586    11.00000    0.02185    0.02703 =
         0.02404   -0.00954   -0.00376    0.00115
AFIX  43
H8    2    0.099287    0.693203   -0.062707    11.00000   -1.20000
AFIX   0
C9    1   -0.089608    0.632778   -0.014974    11.00000    0.02569    0.03075 =
         0.03710   -0.01551   -0.01211   -0.00005
AFIX  43
H9    2   -0.132956    0.620138   -0.046656    11.00000   -1.20000
AFIX   0
C10   1   -0.163631    0.607928    0.040764    11.00000    0.02121    0.02362 =
         0.04322   -0.00547   -0.00546   -0.00466
AFIX  43
H10   2   -0.257627    0.578291    0.047024    11.00000   -1.20000
AFIX   0
C11   1   -0.101905    0.625880    0.087514    11.00000    0.02213    0.03418 =
         0.02916   -0.00039    0.00027   -0.00561
AFIX  43
H11   2   -0.153442    0.608327    0.125565    11.00000   -1.20000
AFIX   0
C12   1    0.035214    0.669506    0.078680    11.00000    0.02139    0.03218 =
         0.02114   -0.00383   -0.00255   -0.00383
AFIX  43
H12   2    0.077594    0.682207    0.110564    11.00000   -1.20000
AFIX   0
C13   1    0.377157    0.709934    0.074522    11.00000    0.01701    0.02623 =
         0.01904   -0.00582   -0.00077    0.00083
C14   1    0.465631    0.772657    0.093994    11.00000    0.02325    0.03173 =
         0.02686   -0.00382   -0.00445   -0.00630
AFIX  43
H14   2    0.473707    0.843271    0.074514    11.00000   -1.20000
AFIX   0
C15   1    0.541621    0.731487    0.141857    11.00000    0.02392    0.04901 =
         0.02772   -0.00710   -0.00753   -0.00840
AFIX  43
H15   2    0.600332    0.774321    0.155575    11.00000   -1.20000
AFIX   0
C16   1    0.532195    0.628028    0.169751    11.00000    0.02255    0.04651 =
         0.02259   -0.00180   -0.00644    0.00356
AFIX  43
H16   2    0.583637    0.600312    0.202746    11.00000   -1.20000
AFIX   0
C17   1    0.448013    0.565174    0.149596    11.00000    0.02649    0.03120 =
         0.02656   -0.00227   -0.00382    0.00409
AFIX  43
H17   2    0.444217    0.493983    0.168145    11.00000   -1.20000
AFIX   0
C18   1    0.369217    0.605240    0.102577    11.00000    0.02344    0.02392 =
         0.02436   -0.00404   -0.00309   -0.00060
AFIX  43
H18   2    0.310032    0.561973    0.089385    11.00000   -1.20000
AFIX   0
C19   1    0.396150    0.739875   -0.052566    11.00000    0.02013    0.02539 =
         0.02030   -0.00601   -0.00161    0.00114
AFIX  13
H19   2    0.342561    0.767785   -0.087586    11.00000   -1.20000
AFIX   0
C20   1    0.427037    0.624941   -0.046681    11.00000    0.03015    0.02616 =
         0.02863   -0.01100   -0.00384    0.00570
AFIX 137
H20A  2    0.484269    0.614985   -0.082365    11.00000   -1.50000
H20B  2    0.333938    0.589388   -0.040617    11.00000   -1.50000
H20C  2    0.482638    0.597021   -0.013302    11.00000   -1.50000
AFIX   0
C21   1    0.540436    0.797355   -0.061052    11.00000    0.02133    0.04029 =
         0.03047   -0.01067    0.00761   -0.00456
AFIX 137
H21A  2    0.593196    0.771801   -0.026640    11.00000   -1.50000
H21B  2    0.518774    0.870904   -0.066264    11.00000   -1.50000
H21C  2    0.601332    0.786008   -0.095661    11.00000   -1.50000
AFIX   0
P1    5    0.281382    0.760265    0.011571    11.00000    0.01525    0.01906 =
         0.01799   -0.00448   -0.00113   -0.00017

C31   1    0.104097    0.786183    0.421313    11.00000    0.01676    0.02748 =
         0.01933   -0.00428   -0.00096    0.00170
C32   1    0.108456    0.889557    0.391656    11.00000    0.02341    0.02949 =
         0.02678   -0.00376   -0.00205    0.00292
AFIX  43
H32   2    0.166365    0.935089    0.403680    11.00000   -1.20000
AFIX   0
C33   1    0.028114    0.925906    0.344543    11.00000    0.02875    0.03845 =
         0.02882    0.00513   -0.00158    0.00997
AFIX  43
H33   2    0.030434    0.996448    0.324493    11.00000   -1.20000
AFIX   0
C34   1   -0.055635    0.859188    0.326717    11.00000    0.02456    0.06224 =
         0.02067   -0.00223   -0.00694    0.00962
AFIX  43
H34   2   -0.109103    0.884024    0.294019    11.00000   -1.20000
AFIX   0
C35   1   -0.061604    0.756994    0.356249    11.00000    0.02545    0.05305 =
         0.02655   -0.01012   -0.00812   -0.00411
AFIX  43
H35   2   -0.119575    0.711760    0.344018    11.00000   -1.20000
AFIX   0
C36   1    0.016980    0.720295    0.403773    11.00000    0.02250    0.03518 =
         0.02647   -0.00426   -0.00471   -0.00340
AFIX  43
H36   2    0.011522    0.650146    0.424446    11.00000   -1.20000
AFIX   0
C37   1    0.249755    0.606114    0.490499    11.00000    0.01536    0.02205 =
         0.02451   -0.00599   -0.00402   -0.00068
C38   1    0.254446    0.538464    0.545362    11.00000    0.02759    0.02434 =
         0.03055   -0.00743   -0.01100   -0.00104
AFIX  43
H38   2    0.223598    0.560819    0.579734    11.00000   -1.20000
AFIX   0
C39   1    0.304437    0.438552    0.549224    11.00000    0.03049    0.02371 =
         0.04609   -0.00070   -0.01950   -0.00230
AFIX  43
H39   2    0.308724    0.392273    0.586431    11.00000   -1.20000
AFIX   0
C40   1    0.348186    0.405709    0.499216    11.00000    0.01976    0.02274 =
         0.06330   -0.01617   -0.00963    0.00087
AFIX  43
H40   2    0.381487    0.336790    0.502277    11.00000   -1.20000
AFIX   0
C41   1    0.343812    0.472377    0.444861    11.00000    0.02170    0.03429 =
         0.04986   -0.02210    0.00595   -0.00145
AFIX  43
H41   2    0.373613    0.449038    0.410735    11.00000   -1.20000
AFIX   0
C42   1    0.296166    0.573104    0.439896    11.00000    0.02405    0.02799 =
         0.02910   -0.01072    0.00268   -0.00197
AFIX  43
H42   2    0.294953    0.619396    0.402534    11.00000   -1.20000
AFIX   0
C43   1    0.370143    0.807660    0.473896    11.00000    0.01646    0.01731 =
         0.02443   -0.00440   -0.00247    0.00091
C44   1    0.429652    0.827176    0.521534    11.00000    0.02196    0.02538 =
         0.02422   -0.00879   -0.00342   -0.00042
AFIX  43
H44   2    0.377026    0.810259    0.559395    11.00000   -1.20000
AFIX   0
C45   1    0.566427    0.871527    0.512627    11.00000    0.02418    0.03065 =
         0.03211   -0.01210   -0.00809   -0.00011
AFIX  43
H45   2    0.607521    0.884956    0.544604    11.00000   -1.20000
AFIX   0
C46   1    0.643182    0.896264    0.457464    11.00000    0.02026    0.02749 =
         0.04280   -0.00667   -0.00611   -0.00435
AFIX  43
H46   2    0.736476    0.926731    0.451811    11.00000   -1.20000
AFIX   0
C47   1    0.584636    0.876816    0.410340    11.00000    0.02042    0.03091 =
         0.02963   -0.00118    0.00148   -0.00352
AFIX  43
H47   2    0.637798    0.894005    0.372587    11.00000   -1.20000
AFIX   0
C48   1    0.448219    0.832190    0.418453    11.00000    0.02033    0.02754 =
         0.02184   -0.00522   -0.00142   -0.00128
AFIX  43
H48   2    0.408254    0.818429    0.386323    11.00000   -1.20000
AFIX   0
C49   1    0.086505    0.756317    0.548675    11.00000    0.01786    0.02692 =
         0.02085   -0.00802    0.00035    0.00097
AFIX  13
H49   2    0.141642    0.730123    0.583417    11.00000   -1.20000
AFIX   0
C50   1   -0.054171    0.695011    0.557755    11.00000    0.02263    0.04066 =
         0.02896   -0.01015    0.00540   -0.00560
AFIX 137
H50A  2   -0.114335    0.703575    0.593142    11.00000   -1.50000
H50B  2   -0.028434    0.622216    0.561865    11.00000   -1.50000
H50C  2   -0.109584    0.720090    0.524055    11.00000   -1.50000
AFIX   0
C51   1    0.049412    0.870587    0.542872    11.00000    0.02438    0.03336 =
         0.03015   -0.01406   -0.00252    0.00573
AFIX 137
H51A  2   -0.007185    0.896835    0.509621    11.00000   -1.50000
H51B  2    0.140425    0.908595    0.536637    11.00000   -1.50000
H51C  2   -0.008692    0.879303    0.578652    11.00000   -1.50000
AFIX   0
P31   5    0.202376    0.739131    0.484035    11.00000    0.01513    0.02028 =
         0.01736   -0.00477   -0.00197    0.00030

AFIX   6
O61   4   -0.051735    0.811711   -0.307017    11.00000    0.02233    0.03162 =
         0.02989   -0.00934   -0.00571   -0.00684
H61A  2   -0.025021    0.826510   -0.276356    11.00000   -1.50000
H61B  2   -0.069184    0.746452   -0.295877    11.00000   -1.50000
AFIX   6

O62   4    0.668825    0.831612   -0.349092    11.00000    0.01858    0.03801 =
         0.03083   -0.01333   -0.00395    0.00186
H62A  2    0.596061    0.864033   -0.334039    11.00000   -1.50000
H62B  2    0.744629    0.844532   -0.333711    11.00000   -1.50000
AFIX   6

O63   4    0.514091    0.690220   -0.197073    11.00000    0.02098    0.02586 =
         0.02752   -0.00601   -0.00730   -0.00382
H63A  2    0.536257    0.754661   -0.208850    11.00000   -1.50000
H63B  2    0.488922    0.674975   -0.227875    11.00000   -1.50000
AFIX   6

O64   4   -0.025169    0.855705    0.175047    11.00000    0.06084    0.06931 =
         0.04830   -0.00325   -0.00794    0.01714
H64A  2    0.051861    0.841344    0.193897    11.00000   -1.50000
H64B  2   -0.044132    0.920334    0.173099    11.00000   -1.50000
AFIX   6

O65   4   -0.200038    0.696249    0.230540    11.00000    0.03753    0.05997 =
         0.08057   -0.02891   -0.02438    0.01613
H65A  2   -0.158322    0.754921    0.215415    11.00000   -1.50000
H65B  2   -0.127376    0.651981    0.235870    11.00000   -1.50000
AFIX   6

O66   4    0.582473    0.671500    0.318146    11.00000    0.05723    0.03918 =
         0.04910   -0.01416   -0.01553    0.00834
H66A  2    0.652628    0.684947    0.289527    11.00000   -1.50000
H66B  2    0.560865    0.608209    0.321108    11.00000   -1.50000
AFIX   6

O67   4    0.206191    0.329915    0.153768    11.00000    0.01714    0.03937 =
         0.03046   -0.01487   -0.00423    0.00308
H67A  2    0.132590    0.359490    0.170274    11.00000   -1.50000
H67B  2    0.281899    0.342648    0.169298    11.00000   -1.50000
AFIX   0
HKLF 4


REM  2010src0454b in P-1
REM wR2 = 0.1571, GooF = S = 1.038, Restrained GooF = 1.038 for all data
REM R1 = 0.0563 for 9327 Fo > 4sig(Fo) and 0.0831 for all 12993 data
REM 763 parameters refined using 1 restraints

END

WGHT      0.0750      1.5021

REM Instructions for potential hydrogen bonds
HTAB O7 O62_$4
HTAB O8 O20_$5
HTAB O9 O63_$6
HTAB O10 O7_$1
HTAB O17 O61
HTAB O18 O19_$1
HTAB O19 O67_$4
HTAB O20 O66_$5
HTAB C2 O13
HTAB C6 O64
HTAB C8 O9_$6
HTAB C20 O63
EQIV $7 -x, -y+1, -z+1
HTAB C38 O10_$7
EQIV $8 x, y, z+1
HTAB C44 O17_$8
HTAB C51 O61_$8

REM Highest difference peak  0.940,  deepest hole -0.540,  1-sigma level  0.099
Q1    1   0.4745  0.6437  0.3180  11.00000  0.05    0.94
Q2    1  -0.2492  0.8449  0.2148  11.00000  0.05    0.86
;
_shelx_res_checksum                33921
_shelx_hkl_file
;
  -2   0   0 182.034   9.022   7
  -2   0   0 175.966   8.802   1
  -2   0   0 180.064  10.618   1
  -2   0   0 208.332  12.012   3
  -2   0   0 190.397  15.120   5
  -2   0   0 196.992  16.242   2
   2   0   0 184.878  13.840   2
   2   0   0 191.103  11.947   3
   2   0   0 194.503  11.592   7
   2   0   0 185.012   8.750   1
   2   0   0 178.596  13.282   5
  -3   0   0 1.46395 1.80603   7
  -3   0   0 0.46794 0.71326   1
  -3   0   0 -0.5552  1.7513   2
  -3   0   0 0.93177 0.79692   1
  -3   0   0 0.32940 1.45087   3
  -3   0   0 -0.5929  1.3403   5
   3   0   0 4.47521 2.04516   3
   3   0   0 2.24714 1.69396   5
   3   0   0 -0.7097  0.7154   1
   3   0   0 -1.3010  1.3951   7
   3   0   0 1.76926 2.25606   2
  -4   0   0 22.9852  2.4871   7
  -4   0   0 21.5351  1.5487   1
  -4   0   0 15.7873  1.3372   1
   4   0   0 14.0480  1.2605   1
   4   0   0 17.2030  2.6281   5
   4   0   0 19.9454  2.8057   2
   4   0   0 18.3094  3.3226   3
  -5   0   0 287.974   9.525   1
  -5   0   0 271.932  10.965   7
  -5   0   0 238.667  11.832   1
   5   0   0 303.375  20.284   1
   5   0   0 288.605  27.275   3
   5   0   0 281.254  14.856   2
   5   0   0 291.041  16.756   5
   5   0   0 256.835  13.651   1
  -6   0   0 40.2762  2.2996   1
  -6   0   0 46.6206  5.3216   7
  -6   0   0 46.3238  4.9742   4
  -6   0   0 48.5960  4.5225   6
   6   0   0 43.4591  2.9366   1
   6   0   0 38.0451  4.7725   3
   6   0   0 32.5740  3.8215   2
   6   0   0 44.9873  4.8072   5
   6   0   0 35.7804  2.2699   1
  -7   0   0 3.21275 3.70458   4
  -7   0   0 1.73947 2.10492   6
  -7   0   0 -0.4607  3.2333   7
   7   0   0 4.44078 3.19802   2
   7   0   0 7.80139 3.26990   5
   7   0   0 4.21019 3.50711   3
  -8   0   0 58.3475  7.3409   4
  -8   0   0 47.3222  6.7243   6
  -8   0   0 44.4257  5.7395   8
  -8   0   0 54.3909  6.9722   7
   8   0   0 54.3493  6.2159   3
   8   0   0 56.8117  7.3675   2
  -9   0   0 100.773  10.555   7
  -9   0   0 121.297   9.754   4
   9   0   0 80.5735  9.2978   3
 -10   0   0 3.84365 5.96082   4
 -10   0   0 2.95081 6.40609   7
  10   0   0 4.27314 5.52097   3
 -11   0   0 140.921  14.755   7
 -11   0   0 124.608  16.426   4
  11   0   0 148.159  16.812   3
  11  -1   0 83.7871 10.5763   3
 -11   1   0 74.6923 12.8271   7
 -11   1   0 63.4463 10.1783   4
  10  -1   0 89.3443 11.8281   3
 -10   1   0 90.2043 10.5545   4
 -10   1   0 91.0652 12.8772   7
   9  -1   0 11.4750  5.7565   3
  -9   1   0 15.4078  4.6097   4
  -9   1   0 9.23867 3.33630   8
  -9   1   0 11.5169  5.7411   7
   8  -1   0 632.675  38.721   3
   8  -1   0 578.051  27.900   2
   8  -1   0 613.733  45.278   5
  -8   1   0 587.404  28.583   4
  -8   1   0 578.981  27.763   7
   7  -1   0 129.902   8.743   3
   7  -1   0 145.515   8.933   2
   7  -1   0 127.409   7.450   5
  -7   1   0 157.574  10.764   7
  -7   1   0 127.417  12.216   6
   6  -1   0 14.0445  1.1937   1
   6  -1   0 19.4744  4.2200   3
   6  -1   0 23.8638  3.7898   5
   6  -1   0 15.1799  1.5388   1
   6  -1   0 15.0240  3.0607   2
  -6   1   0 15.6639  1.3287   1
  -6   1   0 12.9007  3.2358   7
  -6   1   0 18.0517  2.9447   6
   5  -1   0 0.52732 2.14977   5
   5  -1   0 2.10682 0.89276   1
   5  -1   0 1.21659 1.00587   1
   5  -1   0 3.32706 2.33178   2
   5  -1   0 0.91955 1.84050   3
  -5   1   0 0.59386 2.48308   7
  -5   1   0 0.09720 0.86831   1
  -5   1   0 0.39446 1.02631   1
  -5   1   0 0.66143 1.36348   6
   4  -1   0 8.72088 2.47070   5
   4  -1   0 12.8890  2.8826   2
   4  -1   0 10.7314  1.3354   1
   4  -1   0 19.5491  3.2231   3
  -4   1   0 8.28345 1.11806   1
  -4   1   0 12.3175  1.3580   1
  -4   1   0 16.1822  2.8148   7
  -4   1   0 15.1808  2.3112   6
   3  -1   0 28.4141  2.8498   2
   3  -1   0 27.4899  3.0701   5
   3  -1   0 24.6642  2.8683   3
   3  -1   0 25.6446  1.9780   1
  -3   1   0 25.1202  2.7997   5
  -3   1   0 28.0640  2.3665   6
  -3   1   0 27.4304  3.0551   7
  -3   1   0 28.7901  1.8690   1
  -3   1   0 26.1885  1.6886   1
  -3   1   0 23.3049  3.4963   2
  -3   1   0 27.4084  2.8008   3
   2  -1   0 144.157   8.575   3
   2  -1   0 141.699   7.919   2
   2  -1   0 135.528   8.155   5
   2  -1   0 120.529   6.620   1
  -2   1   0 141.447  10.655   3
  -2   1   0 126.753   8.927   2
  -2   1   0 116.570   7.144   5
  -2   1   0 125.386   7.901   1
  -2   1   0 127.599   6.481   6
  -2   1   0 133.059   7.293   1
  -2  -1   0 52.4741  3.2005   1
  -2  -1   0 69.0146  4.5960   2
  -2  -1   0 62.3309  3.0585   1
  -2  -1   0 52.3253  3.5392   4
  -2  -1   0 60.2124  4.4604   3
  -2  -1   0 67.5169  3.8552   8
  -2  -1   0 62.5586  4.6343   7
  -2  -1   0 65.8441  4.4371   5
   2   1   0 64.1518  2.8614   1
   2   1   0 59.2382  4.8206   3
   2   1   0 56.0568  3.7809   1
   2   1   0 62.4150  5.0434   5
   2   1   0 61.4271  5.5299   7
   2   1   0 57.8154  4.1094   2
  -3  -1   0 1387.95  129.69   5
  -3  -1   0 1468.18   90.46   2
  -3  -1   0 1413.66   66.82   4
  -3  -1   0 1382.53   75.42   1
  -3  -1   0 1431.96   85.13   3
  -3  -1   0 1391.99   83.28   7
  -3  -1   0 1405.46   53.06   1
  -3  -1   0 1417.41   66.27   8
   3   1   0 1341.49   86.04   3
   3   1   0 1270.61   60.33   1
   3   1   0 1370.82   87.58   5
   3   1   0 1485.86   84.84   7
   3   1   0 1359.56   78.73   2
  -4  -1   0 66.0950  4.6441   7
  -4  -1   0 67.7242  4.1072   4
  -4  -1   0 62.8417  4.2887   1
  -4  -1   0 68.8797  3.6092   1
  -4  -1   0 67.6431  4.2642   8
   4   1   0 69.6369  4.7544   2
   4   1   0 61.0837  4.8987   5
   4   1   0 61.9737  3.7161   1
   4   1   0 65.6108  5.3227   3
  -5  -1   0 348.415  11.591   1
  -5  -1   0 339.732  15.733   7
  -5  -1   0 336.199  15.287   4
  -5  -1   0 303.313  19.381   1
  -5  -1   0 350.524  18.820   8
   5   1   0 313.255  12.639   1
   5   1   0 361.381  21.032   3
   5   1   0 344.171  28.153   5
   5   1   0 283.693  15.692   2
  -6  -1   0 3.69430 1.96292   8
  -6  -1   0 1.78096 1.20525   1
  -6  -1   0 4.30618 3.08476   4
  -6  -1   0 1.94016 3.31408   7
   6   1   0 0.42830 1.13211   1
   6   1   0 2.09455 2.36026   3
   6   1   0 1.33179 2.40581   5
   6   1   0 2.42398 2.55844   2
   6   1   0 2.41044 1.00229   1
  -7  -1   0 121.022   7.976   7
  -7  -1   0 103.243   7.587   8
  -7  -1   0 113.923   9.238   4
  -7  -1   0 112.607   9.035   6
   7   1   0 96.1681  4.4914   1
   7   1   0 108.439   8.570   2
   7   1   0 109.737   8.157   3
   7   1   0 116.240   7.039   1
  -8  -1   0 2.33760 2.93221   6
  -8  -1   0 11.8158  4.7264   7
  -8  -1   0 6.27977 2.76875   8
  -8  -1   0 2.76689 4.14974   4
   8   1   0 4.16553 4.14297   3
  -9  -1   0 10.8748  4.5245   4
  -9  -1   0 18.3427  6.1126   7
   9   1   0 10.8568  5.6061   3
  10   1   0 113.248  92.419   3
 -11  -1   0 111.151  12.028   7
 -11  -1   0 110.163  13.517   4
  11   1   0 131.933  20.765   3
  11  -2   0 2.76208 6.66672   3
 -11   2   0 4.60387 6.92960   4
 -11   2   0 3.87102 6.84900   7
  10  -2   0 36.8264  7.0241   3
 -10   2   0 34.1467  8.2705   7
 -10   2   0 20.7193  5.3739   4
   9  -2   0 4.54679 4.58892   3
   9  -2   0 4.91956 4.49419   2
   9  -2   0 7.44573 6.46042   5
  -9   2   0 6.37420 4.85839   4
  -9   2   0 0.30755 4.89300   7
   8  -2   0 1006.27   43.91   2
   8  -2   0 997.608  63.787   3
   8  -2   0 1014.72   61.86   5
  -8   2   0 1020.51   50.52   7
   7  -2   0 612.368  28.725   5
   7  -2   0 688.408  31.432   1
   7  -2   0 669.141  30.491   2
   7  -2   0 652.999  45.818   3
   7  -2   0 591.234  36.070   1
  -7   2   0 654.269  31.047   6
  -7   2   0 685.487  32.198   7
   6  -2   0 297.321  11.142   2
   6  -2   0 288.035  18.436   3
   6  -2   0 294.409  14.852   1
   6  -2   0 291.407  18.975   1
   6  -2   0 291.534  11.884   5
  -6   2   0 296.903   9.175   1
  -6   2   0 278.155  13.959   6
  -6   2   0 279.202  13.139   7
   5  -2   0 -0.2731  2.0986   5
   5  -2   0 10.4836  3.1941   2
   5  -2   0 4.35132 2.48893   3
   5  -2   0 8.49280 1.41985   1
  -5   2   0 5.43372 1.41137   1
  -5   2   0 4.98253 1.34291   6
  -5   2   0 5.88930 2.39852   7
   4  -2   0 125.559   9.297   5
   4  -2   0 131.971   7.218   2
   4  -2   0 115.705   6.987   1
   4  -2   0 138.887   8.238   3
   4  -2   0 119.757   6.536   1
  -4   2   0 129.550   6.822   6
  -4   2   0 108.132   4.489   1
  -4   2   0 114.973   7.482   7
  -4   2   0 121.701   7.146   1
   3  -2   0 152.268   8.683   2
   3  -2   0 154.715   7.194   1
   3  -2   0 153.420   7.562   3
   3  -2   0 154.626  10.896   5
   3  -2   0 130.592   8.138   1
  -3   2   0 147.155  12.680   2
  -3   2   0 154.038  19.668   5
  -3   2   0 156.383   8.256   1
  -3   2   0 162.046  11.939   4
  -3   2   0 142.014   6.687   1
  -3   2   0 155.831   9.610   3
   2  -2   0 1246.53   71.77   5
   2  -2   0 1369.22   79.63   6
   2  -2   0 1179.73   82.74   1
   2  -2   0 1261.19   67.39   1
   2  -2   0 1265.52   87.83   3
   2  -2   0 1241.39   98.37   2
  -2   2   0 1431.17   85.04   4
  -2   2   0 1274.93   59.89   1
  -2   2   0 1162.76   62.76   1
  -2   2   0 1298.22   63.73   5
  -2   2   0 1294.94   81.57   2
   1  -2   0 92.2834  5.9768   1
   1  -2   0 95.8971  6.2265   5
   1  -2   0 96.3045  5.8740   1
   1  -2   0 96.4476  7.8017   4
   1  -2   0 98.0057  6.0098   2
  -1   2   0 105.997   7.402   2
  -1   2   0 96.7372  5.2874   1
  -1   2   0 83.1353  5.1714   5
   0   2   0 269.716  32.802   1
  -1  -2   0 6.08575 1.24554   3
  -1  -2   0 10.6383  1.7088   4
  -1  -2   0 7.39147 1.38438   1
  -1  -2   0 7.14034 1.33157   1
   1   2   0 7.11681 1.31114   1
   1   2   0 7.04003 1.25286   4
   1   2   0 9.94115 1.74322   1
   1   2   0 8.81647 1.28884   3
  -2  -2   0 963.214  71.835   1
  -2  -2   0 1153.31   86.79   5
  -2  -2   0 1086.33   88.12   2
  -2  -2   0 1045.81   46.44   1
  -2  -2   0 1076.30   74.11   3
  -2  -2   0 1134.19   78.97   7
  -2  -2   0 1016.75   57.87   4
   2   2   0 1023.17   54.52   4
   2   2   0 962.634  42.867   1
   2   2   0 1076.84   53.09   1
   2   2   0 1128.67   71.38   8
   2   2   0 1095.77   76.39   7
   2   2   0 1018.78   53.92   3
   2   2   0 1015.19   45.32   2
  -3  -2   0 322.686  18.822   5
  -3  -2   0 315.400  13.704   1
  -3  -2   0 299.064  16.582   7
  -3  -2   0 321.808  15.557   4
  -3  -2   0 296.361  26.038   3
  -3  -2   0 293.754  25.537   1
  -3  -2   0 338.525  18.665   8
  -3  -2   0 355.101  24.627   2
   3   2   0 308.605  14.496   7
   3   2   0 298.480  13.231   2
   3   2   0 309.812  17.629   3
   3   2   0 295.582  12.601   1
   3   2   0 307.472  13.393   1
  -4  -2   0 30.7811  4.6083   5
  -4  -2   0 36.9445  3.4344   4
  -4  -2   0 50.7414  3.7695   7
  -4  -2   0 38.4073  2.6332   8
  -4  -2   0 33.8263  3.1647   1
  -4  -2   0 40.9161  2.5280   1
   4   2   0 41.8828  2.7782   1
   4   2   0 43.7945  2.9790   1
   4   2   0 34.1646  3.8874   3
   4   2   0 48.8689  4.9476   2
  -5  -2   0 319.914  14.138   7
  -5  -2   0 310.499  17.572   8
  -5  -2   0 318.140  20.109   4
  -5  -2   0 314.133  15.969   1
   5   2   0 324.623  19.137   2
   5   2   0 321.923  14.186   3
   5   2   0 291.477  15.202   1
   5   2   0 323.763  19.203   1
  -6  -2   0 95.6500  6.5279   8
  -6  -2   0 98.7221  6.8339   4
  -6  -2   0 96.8434  5.0801   1
  -6  -2   0 105.633   7.981   7
   6   2   0 106.743   7.962   3
   6   2   0 93.4794  4.1015   1
   6   2   0 101.229   7.925   2
  -7  -2   0 8.76347 4.23230   7
  -7  -2   0 10.1714  2.9559   8
  -7  -2   0 12.6698  3.9656   4
   7   2   0 8.06914 1.83628   1
   7   2   0 10.7241  3.8959   3
   7   2   0 6.24702 1.47801   1
  -8  -2   0 76.1780  7.7570   4
  -8  -2   0 55.9343  8.9518   7
  -8  -2   0 59.8470  6.3775   6
   8   2   0 50.4692  3.4443   1
  -9  -2   0 10.9411  4.6207   6
  -9  -2   0 3.11904 5.23694   7
  -9  -2   0 7.50860 4.57168   4
   9   2   0 3.38759 4.79295   3
 -10  -2   0 99.3337 12.7252   4
 -10  -2   0 66.1313  8.3425   7
  10   2   0 95.0380 13.3291   3
 -11  -2   0 32.3861  9.0762   4
 -11  -2   0 33.4889  9.8578   7
  11   2   0 27.3379  8.3105   3
  11  -3   0 13.0593  7.9663   3
 -11   3   0 12.0884  7.7448   4
 -11   3   0 39.5068 10.7025   7
  10  -3   0 41.6371 10.0433   3
  10  -3   0 31.6800  8.8270   5
 -10   3   0 40.2908  8.3004   7
 -10   3   0 36.9047  7.6914   4
   9  -3   0 77.3970  9.2914   5
   9  -3   0 78.1063  9.6840   3
   9  -3   0 93.6875  8.8207   2
  -9   3   0 72.7637  7.5925   4
  -9   3   0 64.6355  8.9189   7
   8  -3   0 51.6522  4.1487   1
   8  -3   0 56.5704  9.0718   5
   8  -3   0 70.9553  9.7269   2
   8  -3   0 73.3172 10.2936   3
   7  -3   0 213.004  15.396   3
   7  -3   0 226.572  15.827   5
   7  -3   0 198.213  12.596   1
   7  -3   0 218.599  11.674   2
  -7   3   0 222.434  15.384   7
   6  -3   0 161.332   8.596   2
   6  -3   0 156.905   9.968   3
   6  -3   0 152.867   8.528   5
   6  -3   0 135.943   6.944   1
  -6   3   0 149.124   9.915   7
  -6   3   0 125.706   8.416   1
   5  -3   0 981.605  33.684   3
   5  -3   0 944.122  46.362   2
   5  -3   0 924.436  67.887   5
   5  -3   0 953.275  48.805   1
   5  -3   0 937.586  53.392   1
  -5   3   0 978.337  52.334   7
  -5   3   0 958.719  51.301   1
   4  -3   0 96.0385  6.5696   1
   4  -3   0 95.5417  6.9497   2
   4  -3   0 107.157   6.415   3
   4  -3   0 104.016   4.836   1
   4  -3   0 99.0662  7.8206   5
  -4   3   0 102.256   6.572   1
   3  -3   0 899.825  36.399   1
   3  -3   0 866.692  48.453   1
   3  -3   0 892.147  47.202   5
   3  -3   0 969.992  53.277   6
   3  -3   0 959.899  62.790   2
   3  -3   0 966.477  55.025   3
  -3   3   0 942.229  64.818   2
  -3   3   0 891.852  36.420   1
  -3   3   0 983.758  69.240   4
  -3   3   0 852.161  40.660   1
   2  -3   0 190.868  10.694   2
   2  -3   0 204.338  36.384   4
   2  -3   0 167.746  10.200   1
   2  -3   0 207.213  10.879   5
   2  -3   0 170.642   7.435   1
   2  -3   0 210.825  11.993   3
  -2   3   0 177.492   8.520   1
  -2   3   0 158.435   7.009   1
  -2   3   0 200.977  14.487   4
  -2   3   0 184.368   9.723   5
  -2   3   0 193.646   8.279   2
   1  -3   0 211.513  17.921   4
   1  -3   0 207.695  11.803   1
   1  -3   0 207.119  11.112   2
   1  -3   0 194.467  12.050   1
   1  -3   0 164.471  13.612   5
  -1   3   0 198.137  10.199   1
  -1   3   0 179.515   9.227   2
  -1   3   0 211.922  10.188   5
  -1   3   0 203.808  16.426   4
  -1   3   0 203.323   7.441   1
   0  -3   0 15.8258  1.7363   5
   0  -3   0 15.6848  1.9797   1
   0  -3   0 16.6166  2.1068   4
   0  -3   0 16.0477  2.4153   1
   0  -3   0 13.1074  1.1822   2
   0   3   0 16.3383  2.2823   5
   0   3   0 11.8340  1.7858   4
   0   3   0 12.7512  2.0198   1
   0   3   0 11.7675  2.0831   1
  -1  -3   0 474.540  32.710   4
  -1  -3   0 524.002  42.045   3
  -1  -3   0 537.839  28.520   1
  -1  -3   0 505.095  25.343   1
   1   3   0 498.678  25.155   1
   1   3   0 536.746  33.089   4
   1   3   0 522.587  24.627   1
  -2  -3   0 6.77694 1.44508   2
  -2  -3   0 4.83270 1.92761   3
  -2  -3   0 4.26296 1.37898   1
  -2  -3   0 9.91665 2.60790   4
  -2  -3   0 7.44396 1.87139   1
   2   3   0 4.76838 1.54158   7
   2   3   0 6.84481 1.66636   1
   2   3   0 7.73283 1.85665   1
   2   3   0 8.60051 1.93539   3
   2   3   0 7.07861 1.67246   4
  -3  -3   0 1566.60  165.01   3
  -3  -3   0 1461.81  102.17   1
  -3  -3   0 1563.96   81.12   1
  -3  -3   0 1540.70  109.07   4
  -3  -3   0 1650.27   99.37   2
  -3  -3   0 1571.00   91.20   7
  -3  -3   0 1561.09   98.53   5
   3   3   0 1473.03   65.54   1
   3   3   0 1543.81   73.34   3
   3   3   0 1650.01   78.90   8
   3   3   0 1661.44   80.66   1
   3   3   0 1615.53   79.22   7
  -4  -3   0 295.767  11.978   1
  -4  -3   0 322.751  17.610   7
  -4  -3   0 287.995  17.093   4
  -4  -3   0 289.923  19.349   5
   4   3   0 311.319  15.635   1
   4   3   0 290.353  14.092   3
   4   3   0 287.200  14.574   1
  -5  -3   0 849.120  32.906   1
  -5  -3   0 860.690  49.199   7
  -5  -3   0 794.957  55.970   4
   5   3   0 762.931  48.433   3
   5   3   0 782.916  33.185   1
   5   3   0 902.809  50.627   1
  -6  -3   0 129.700   8.393   8
  -6  -3   0 140.268  12.351   4
  -6  -3   0 126.534  10.116   7
  -6  -3   0 132.842   8.048   1
   6   3   0 124.676   8.057   1
   6   3   0 132.399  10.173   3
   6   3   0 138.119  10.761   1
  -7  -3   0 73.1764  6.0993   8
  -7  -3   0 81.8472  8.5421   4
  -7  -3   0 69.9224  8.5507   7
   7   3   0 87.3231  9.2346   3
   7   3   0 67.9683  4.0725   1
  -8  -3   0 15.8125  5.5003   4
  -8  -3   0 24.5274  4.7484   7
   8   3   0 24.1955  5.6023   3
   8   3   0 18.3481  2.0926   1
  -9  -3   0 104.708  13.080   7
  -9  -3   0 89.1708 10.7751   6
  -9  -3   0 78.9401  9.8959   4
   9   3   0 87.9886 10.7685   3
 -10  -3   0 169.673  14.662   4
 -10  -3   0 144.006  15.314   7
  10   3   0 152.124  16.301   3
 -11  -3   0 58.3715 11.6378   7
 -11  -3   0 55.1872 10.5060   4
  11   3   0 52.5558 11.5978   3
  11  -4   0 57.1184 11.6637   3
 -11   4   0 48.4558  9.4625   4
 -11   4   0 51.8293  9.8331   7
  10  -4   0 6.22822 6.76490   3
  10  -4   0 7.63095 7.04837   5
 -10   4   0 7.98358 4.85227   4
 -10   4   0 3.44181 6.19927   7
   9  -4   0 26.7546  7.5545   2
   9  -4   0 26.6223  6.2086   3
   9  -4   0 15.7909  6.0091   5
  -9   4   0 15.7642  6.4743   7
   8  -4   0 92.3291  9.1972   3
   8  -4   0 98.1062  8.9452   5
   8  -4   0 72.3721  7.3687   1
   8  -4   0 99.2507  8.5775   2
  -8   4   0 81.9550  9.1264   7
   7  -4   0 164.979  11.584   5
   7  -4   0 164.308  11.205   2
   7  -4   0 158.587  10.184   1
   7  -4   0 184.173  11.052   3
  -7   4   0 184.957  13.713   7
   6  -4   0 66.3127  5.8372   1
   6  -4   0 72.0793  5.9720   2
   6  -4   0 80.2559  6.3612   3
   6  -4   0 65.7696  5.7593   5
   6  -4   0 69.8428  5.2861   1
  -6   4   0 75.0848  5.6767   1
  -6   4   0 91.9342  6.7698   7
   5  -4   0 26.5130  2.4093   1
   5  -4   0 32.9190  4.2919   2
   5  -4   0 31.6938  3.2466   1
   5  -4   0 31.5329  4.1034   3
   5  -4   0 30.0979  3.9849   5
  -5   4   0 34.7533  3.3862   1
   4  -4   0 21.4856  2.6249   1
   4  -4   0 26.0650  2.4554   1
   4  -4   0 25.5484  3.5264   5
   4  -4   0 31.8123  4.0849   3
   4  -4   0 23.2524  3.0936   2
  -4   4   0 26.3367  3.0211   1
   3  -4   0 9.49245 2.02436   1
   3  -4   0 7.66078 1.96039   2
   3  -4   0 10.3650  2.2582   3
   3  -4   0 5.51165 1.77262   1
   3  -4   0 10.2965  2.5990   5
   3  -4   0 8.88021 2.95517   4
  -3   4   0 11.0701  1.9973   1
  -3   4   0 5.92734 2.07373   4
   2  -4   0 683.489  34.164   5
   2  -4   0 646.956  35.712   2
   2  -4   0 750.779  50.394   4
   2  -4   0 718.229  32.179   1
   2  -4   0 624.135  35.036   1
  -2   4   0 730.723  32.317   1
  -2   4   0 789.494  33.068   5
  -2   4   0 763.566  38.691   2
  -2   4   0 756.737  62.213   4
   1  -4   0 29.6346  2.9560   4
   1  -4   0 27.7791  2.2997   5
   1  -4   0 24.5219  2.2222   2
   1  -4   0 30.3253  2.9775   1
   1  -4   0 26.5483  3.2419   1
  -1   4   0 27.5780  2.4349   2
  -1   4   0 30.9001  2.9821   4
  -1   4   0 20.8858  2.5069   1
  -1   4   0 29.4394  2.5637   1
  -1   4   0 28.0154  3.3261   5
   0  -4   0 2691.49  197.52   1
   0   4   0 3285.84  314.63   4
   0   4   0 2661.59  259.07   5
  -1  -4   0 221.818  14.286   4
  -1  -4   0 224.098  14.580   1
  -1  -4   0 238.487  13.946   1
  -1  -4   0 242.693  16.461   3
  -1  -4   0 250.095  22.245   5
   1   4   0 232.280  14.594   4
   1   4   0 222.032   9.062   1
   1   4   0 224.278  13.862   1
  -2  -4   0 128.496  12.089   4
  -2  -4   0 119.680   8.940   2
  -2  -4   0 125.398   7.614   3
  -2  -4   0 112.001   5.953   1
   2   4   0 113.816   6.029   1
   2   4   0 111.488   5.995   1
   2   4   0 136.867   9.437   3
   2   4   0 111.323  10.326   4
  -3  -4   0 3.89280 2.40686   4
  -3  -4   0 8.47124 1.97878   2
  -3  -4   0 8.50967 1.96367   1
   3   4   0 12.4502  2.3081   1
   3   4   0 7.63907 2.02736   7
   3   4   0 10.1228  1.8706   1
   3   4   0 11.7588  2.7775   3
   3   4   0 14.2270  1.7884   8
  -4  -4   0 1164.71   52.62   1
  -4  -4   0 1169.03   69.33   7
  -4  -4   0 1080.06   93.99   5
  -4  -4   0 1178.47   68.67   4
   4   4   0 1170.98   71.02   3
   4   4   0 1089.35   47.86   1
   4   4   0 1247.92   98.43   8
   4   4   0 1200.65   45.41   1
  -5  -4   0 491.356  31.466   1
  -5  -4   0 457.213  26.050   7
  -5  -4   0 458.266  27.663   4
   5   4   0 443.306  16.115   1
   5   4   0 480.445  23.486   1
   5   4   0 479.446  33.051   3
  -6  -4   0 66.0148  5.7072   1
  -6  -4   0 64.7663  5.8996   7
  -6  -4   0 88.3251  9.4517   4
   6   4   0 68.9250  7.6780   3
   6   4   0 76.6829  4.2155   1
   6   4   0 71.4457  6.6756   1
  -7  -4   0 21.8843  4.5783   4
  -7  -4   0 19.4194  4.7490   7
   7   4   0 10.1690  3.3784   3
   7   4   0 12.4132  2.2621   1
  -8  -4   0 10.3854  5.4169   4
  -8  -4   0 8.72660 4.88707   7
   8   4   0 -4.1982  5.0993   3
   8   4   0 4.75134 2.22128   1
  -9  -4   0 45.6336  8.2246   7
  -9  -4   0 55.4251  9.8888   4
   9   4   0 28.1363  6.4495   3
 -10  -4   0 182.077  22.110   4
 -10  -4   0 159.492  18.234   7
 -10  -4   0 152.213  28.500   6
  10   4   0 201.558  17.084   3
 -11  -4   0 2.26028 5.91323   7
 -11  -4   0 -2.2419  7.5799   4
  11   4   0 4.54969 6.64454   3
  11  -5   0 -6.1928  7.5231   5
  11  -5   0 8.15663 8.05095   3
 -11   5   0 2.46334 9.37973   7
  10  -5   0 55.5705 10.5433   5
  10  -5   0 63.1134 12.1872   3
 -10   5   0 58.2717  9.0935   4
 -10   5   0 83.4321 12.1246   7
   9  -5   0 16.7805  6.5448   5
   9  -5   0 18.0646  6.3696   2
   9  -5   0 5.28789 5.90039   3
  -9   5   0 17.3962  6.7320   7
   8  -5   0 61.3480  7.9427   5
   8  -5   0 70.9100  9.2881   3
   8  -5   0 40.0625  5.0908   1
   8  -5   0 65.1233  7.5288   2
  -8   5   0 45.4912  8.2117   7
   7  -5   0 71.9992  6.3288   3
   7  -5   0 78.0784  8.3217   2
   7  -5   0 62.1753  5.2538   1
   7  -5   0 71.2373  7.5414   5
  -7   5   0 75.9075  8.6872   7
   6  -5   0 3.93904 3.00253   2
   6  -5   0 13.0050  5.0651   5
   6  -5   0 10.8890  3.8941   3
   6  -5   0 10.2677  2.7669   1
   5  -5   0 1211.79   47.04   2
   5  -5   0 1295.63   67.85   3
   5  -5   0 1209.71   78.51   1
   5  -5   0 1185.76   97.21   5
   5  -5   0 1150.00   77.98   1
  -5   5   0 1220.14   66.04   1
   4  -5   0 100.818   5.698   1
   4  -5   0 110.185   7.365   5
   4  -5   0 106.187   9.731   1
   4  -5   0 108.057   7.235   6
   4  -5   0 126.790   8.641   3
   4  -5   0 115.463   8.271   2
  -4   5   0 102.528   6.882   1
   3  -5   0 188.909   9.892   3
   3  -5   0 195.639  11.977   1
   3  -5   0 189.759  13.098   2
   3  -5   0 184.532  11.820   1
   3  -5   0 210.522  20.003   4
   3  -5   0 178.853   9.377   5
  -3   5   0 194.205  23.543   4
  -3   5   0 203.539   8.269   1
   2  -5   0 -2.8670  1.6474   2
   2  -5   0 -5.1137  1.7251   4
   2  -5   0 3.18360 2.37734   1
   2  -5   0 -3.5619  1.8926   5
   2  -5   0 -1.9354  2.0052   1
  -2   5   0 -4.0197  1.7749   4
  -2   5   0 -1.8784  1.3211   2
  -2   5   0 -1.3799  1.6835   1
   1  -5   0 4902.10  380.88   4
   1  -5   0 4347.75  136.42   1
   1  -5   0 4707.68  313.77   5
   1  -5   0 4400.18  221.49   2
   1  -5   0 4491.76  226.74   1
  -1   5   0 5167.56  302.10   2
  -1   5   0 5025.80  331.55   5
  -1   5   0 4512.31  170.65   1
   0  -5   0 256.600  17.833   1
   0  -5   0 233.522  11.937   2
   0  -5   0 224.411  11.204   1
   0  -5   0 247.799  21.712   4
   0  -5   0 233.018  17.834   5
   0   5   0 233.670  16.703   4
   0   5   0 220.814  11.883   1
   0   5   0 220.083  18.033   5
  -1  -5   0 1725.21  167.12   4
  -1  -5   0 1574.37  131.23   5
  -1  -5   0 1619.21  100.75   3
  -1  -5   0 1750.33   78.58   1
   1   5   0 1761.20   70.78   1
   1   5   0 1700.81   83.12   1
   1   5   0 1575.37  112.17   4
  -2  -5   0 34.5932  2.6348   2
  -2  -5   0 31.3390  3.6354   4
  -2  -5   0 30.3895  2.9924   3
  -2  -5   0 32.4167  4.4931   1
   2   5   0 37.7053  3.4417   1
   2   5   0 28.6618  3.1112   1
  -3  -5   0 1458.24   59.33   1
  -3  -5   0 1308.68   95.22   2
  -3  -5   0 1459.27  131.40   4
   3   5   0 1440.09   86.02   3
   3   5   0 1534.41   77.63   1
   3   5   0 1386.56   47.65   1
  -4  -5   0 0.12053 2.24708   4
  -4  -5   0 -0.5994  1.6348   5
  -4  -5   0 4.20163 2.32329   1
   4   5   0 3.55352 1.37274   8
   4   5   0 7.55794 2.71456   3
   4   5   0 6.40516 2.16661   1
   4   5   0 3.04253 1.94842   1
  -5  -5   0 432.575  25.922   1
  -5  -5   0 413.931  22.647   4
   5   5   0 448.915  29.229   3
   5   5   0 423.379  35.449   1
   5   5   0 403.237  17.146   1
  -6  -5   0 -0.0165  3.2945   7
  -6  -5   0 4.07835 3.64441   4
   6   5   0 3.59649 3.27959   3
   6   5   0 7.05215 2.36792   1
   6   5   0 2.36905 2.20928   1
  -7  -5   0 8.66944 4.04225   7
  -7  -5   0 8.43297 3.89811   4
   7   5   0 8.20413 2.73494   1
   7   5   0 10.5362  3.5338   3
  -8  -5   0 69.6369 10.2641   7
  -8  -5   0 81.5335  8.1548   4
   8   5   0 74.1447  7.6868   3
   8   5   0 62.8809  6.4356   1
  -9  -5   0 0.45855 5.35324   7
  -9  -5   0 -2.2833  5.7231   4
   9   5   0 4.66038 4.21319   3
   9   5   0 5.42220 3.10999   1
 -10  -5   0 148.275  16.824   4
 -10  -5   0 144.392  16.847   6
 -10  -5   0 161.486  16.687   7
  10   5   0 162.634  15.875   3
 -11  -5   0 137.105  17.887   7
 -11  -5   0 157.905  15.082   4
  11   5   0 169.051  18.855   3
  10  -6   0 61.5822  8.8937   3
  10  -6   0 41.6210  9.2048   5
 -10   6   0 55.2447 12.9405   7
   9  -6   0 186.675  17.456   2
   9  -6   0 175.019  11.731   5
   9  -6   0 176.143  19.460   3
  -9   6   0 205.660  18.638   7
   8  -6   0 1.56658 5.75021   2
   8  -6   0 0.27155 2.80575   1
   8  -6   0 4.97807 4.55319   5
   8  -6   0 -0.3361  4.3869   3
  -8   6   0 6.17290 5.25979   7
   7  -6   0 153.959  11.758   2
   7  -6   0 147.697  12.706   1
   7  -6   0 169.574  12.241   3
   7  -6   0 181.035  11.886   5
  -7   6   0 135.549  11.334   7
   6  -6   0 7.44105 4.76878   5
   6  -6   0 4.41938 3.25159   2
   6  -6   0 -0.1364  4.0290   3
   6  -6   0 1.86374 2.49078   1
   5  -6   0 -1.4410  2.8112   5
   5  -6   0 1.02148 2.08608   1
   5  -6   0 0.59297 2.48645   1
   5  -6   0 -2.1456  3.1749   3
   5  -6   0 -0.7653  3.5298   2
  -5   6   0 0.70120 1.95515   1
   4  -6   0 30.4548  4.3561   4
   4  -6   0 24.8603  4.2479   2
   4  -6   0 30.7652  3.7016   1
   4  -6   0 22.2474  3.2850   3
   4  -6   0 29.8778  4.3681   5
   4  -6   0 22.6746  3.1324   1
  -4   6   0 23.4661  3.0502   1
   3  -6   0 23.9138  3.5535   1
   3  -6   0 30.9206  3.8430   1
   3  -6   0 24.3509  3.9255   4
   3  -6   0 23.2714  3.4578   5
   3  -6   0 29.0481  2.8065   2
   3  -6   0 22.2229  3.1816   3
  -3   6   0 27.3808  3.1220   1
   2  -6   0 2766.37  251.05   5
   2  -6   0 2800.99  179.61   4
   2  -6   0 2614.68  144.95   1
   2  -6   0 2568.47  132.57   1
   2  -6   0 2554.18   82.61   2
  -2   6   0 2583.38   84.83   1
  -2   6   0 2891.49  233.24   2
   1  -6   0 3.42508 1.57250   2
   1  -6   0 0.26272 1.78152   5
   1  -6   0 4.23845 2.69965   4
   1  -6   0 1.58086 2.10069   1
  -1   6   0 -1.4229  1.5600   5
  -1   6   0 2.58100 1.89441   1
  -1   6   0 -0.6140  1.8139   4
   0  -6   0 3015.15  152.89   1
   0  -6   0 3169.75  310.87   4
   0  -6   0 3134.26  219.65   5
   0  -6   0 2944.66  139.07   2
   0   6   0 3082.40  243.48   4
   0   6   0 3344.42  259.78   5
   0   6   0 3024.86  118.38   1
  -1  -6   0 3.87043 2.37927   4
  -1  -6   0 3.07052 2.74428   1
  -1  -6   0 0.75455 1.52846   3
  -1  -6   0 3.04143 1.39372   5
   1   6   0 1.30316 2.31674   1
  -2  -6   0 227.968  22.909   5
  -2  -6   0 237.092  18.536   3
  -2  -6   0 234.110  13.937   4
  -2  -6   0 247.680  13.217   1
  -2  -6   0 208.264  14.202   2
   2   6   0 250.040   9.746   1
  -3  -6   0 35.1714  3.8805   1
  -3  -6   0 27.9861  3.3382   2
  -3  -6   0 28.4806  3.8310   4
   3   6   0 33.4171  4.6222   1
  -4  -6   0 0.18282 1.62220   5
  -4  -6   0 3.72781 2.77491   4
  -4  -6   0 1.63119 2.05762   1
   4   6   0 0.43408 1.59570   8
   4   6   0 -1.8407  2.2076   1
   4   6   0 0.88634 2.20689   1
   4   6   0 -3.1969  2.3103   3
  -5  -6   0 47.4395  6.3556   4
  -5  -6   0 43.3287  5.3504   1
   5   6   0 48.2319  6.0160   8
   5   6   0 41.1067  5.5188   1
   5   6   0 45.9058  4.0664   1
   5   6   0 50.6542  6.2541   3
  -6  -6   0 2.64600 2.57045   1
  -6  -6   0 -2.2240  3.9183   4
   6   6   0 1.92795 2.42753   3
   6   6   0 1.74536 2.13378   1
  -7  -6   0 0.49441 3.17776   4
   7   6   0 2.56242 2.80186   1
   7   6   0 4.11448 3.73845   3
  -8  -6   0 4.18332 5.56290   4
   8   6   0 6.48867 4.52588   3
   8   6   0 -1.0360  2.6087   1
  -9  -6   0 4.77650 6.42181   4
   9   6   0 3.61285 2.86686   1
   9   6   0 0.03271 5.28253   3
 -10  -6   0 87.5247 13.8564   4
  10   6   0 109.748  13.072   3
 -11  -6   0 103.985  21.543   4
  11   6   0 106.460  12.818   3
  10  -7   0 41.4216 11.2992   3
  10  -7   0 66.0928 10.4078   5
 -10   7   0 59.0152 12.9786   7
   9  -7   0 255.716  20.724   3
   9  -7   0 302.550  27.377   5
  -9   7   0 325.798  25.835   7
   8  -7   0 12.0633  5.3155   3
   8  -7   0 7.27250 3.53797   1
   8  -7   0 23.7884  6.2833   5
   8  -7   0 14.5308  5.4442   2
  -8   7   0 16.9292  5.8138   7
   7  -7   0 217.304  19.472   1
   7  -7   0 237.430  16.546   2
   7  -7   0 232.538  19.401   3
   7  -7   0 223.387  17.248   5
   6  -7   0 28.4417  4.5871   1
   6  -7   0 30.8975  4.6407   5
   6  -7   0 34.1138  5.6127   3
   6  -7   0 23.8528  4.8510   2
   5  -7   0 172.900  10.634   2
   5  -7   0 178.072  15.852   5
   5  -7   0 156.648  12.226   1
   5  -7   0 165.211  17.090   3
  -5   7   0 168.714  12.150   1
   4  -7   0 45.7514  5.3345   3
   4  -7   0 43.6683  4.8712   1
   4  -7   0 38.3426  5.2601   5
   4  -7   0 41.8420  5.8222   4
   4  -7   0 43.0808  5.0024   2
  -4   7   0 54.7276  5.4081   1
   3  -7   0 123.381   8.941   1
   3  -7   0 138.618   9.735   5
   3  -7   0 121.702   9.643   3
   3  -7   0 133.930   9.255   2
   3  -7   0 147.388  11.703   4
  -3   7   0 136.934  10.118   1
   2  -7   0 13.4381  2.9837   5
   2  -7   0 6.44311 3.09272   1
   2  -7   0 13.5633  3.4221   4
   2  -7   0 12.7126  2.2991   2
  -2   7   0 10.9335  2.9228   1
  -2   7   0 8.97952 2.44306   2
   1  -7   0 485.854  19.833   2
   1  -7   0 421.365  23.077   5
   1  -7   0 486.169  48.834   4
   1  -7   0 464.202  25.052   1
  -1   7   0 440.870  23.083   1
   0  -7   0 38.9743  4.6297   1
   0  -7   0 26.5213  4.5634   4
   0  -7   0 33.6903  4.0473   5
   0  -7   0 27.9981  1.8173   2
   0   7   0 28.0222  3.5143   5
   0   7   0 37.9678  4.1120   1
  -1  -7   0 11.2117  2.9675   4
  -1  -7   0 4.81288 1.92954   5
  -1  -7   0 6.60062 1.85698   3
  -1  -7   0 10.3656  2.8585   1
   1   7   0 10.0730  2.7543   1
  -2  -7   0 13.6608  3.1559   4
  -2  -7   0 10.4107  1.5566   2
  -2  -7   0 12.5910  2.1865   5
  -2  -7   0 10.9615  2.7744   3
  -2  -7   0 10.5544  3.2718   1
   2   7   0 9.64115 3.10639   1
  -3  -7   0 491.266  26.773   1
  -3  -7   0 504.195  49.661   4
  -3  -7   0 415.142  31.385   2
   3   7   0 465.313  19.579   1
  -4  -7   0 38.7491  4.3331   1
  -4  -7   0 25.1664  4.5858   4
   4   7   0 40.8399  4.0489   1
  -5  -7   0 18.2477  4.3094   4
  -5  -7   0 17.0580  3.6994   1
   5   7   0 15.9961  2.2217   8
   5   7   0 16.4516  3.2564   1
   5   7   0 21.5447  3.6380   3
  -6  -7   0 8.12293 3.43869   1
  -6  -7   0 12.4885  4.8531   4
   6   7   0 9.50168 3.32045   1
   6   7   0 6.05742 3.71703   3
  -7  -7   0 14.2034  5.9303   4
   7   7   0 0.30602 3.53899   3
   7   7   0 7.82540 2.87282   1
  -8  -7   0 5.30443 5.43474   4
   8   7   0 2.41857 5.24896   3
   8   7   0 1.54438 2.81362   1
  -9  -7   0 61.3211 10.3664   4
   9   7   0 51.8470  8.8754   3
   9   7   0 51.7774  6.0852   1
 -10  -7   0 3.04345 7.60348   4
  10   7   0 2.06791 6.91953   3
  10  -8   0 31.8742  9.4572   5
  10  -8   0 13.3808  7.5982   3
 -10   8   0 30.5853  9.5826   7
   9  -8   0 -4.1517  6.7439   5
   9  -8   0 10.5561  6.6908   3
  -9   8   0 12.5812  8.6131   7
   8  -8   0 34.8898  6.0790   2
   8  -8   0 44.4746  8.5821   5
   8  -8   0 33.2586  5.8210   1
   8  -8   0 39.9449  6.1644   3
  -8   8   0 34.3531  7.8071   7
   7  -8   0 38.2938  6.3702   2
   7  -8   0 36.9295  8.1888   5
   7  -8   0 19.2350  4.4164   1
   7  -8   0 25.7258  5.0568   3
   6  -8   0 77.1838  7.7815   5
   6  -8   0 71.9128  7.0857   1
   6  -8   0 90.1983 11.3314   3
   6  -8   0 100.489  10.639   2
   5  -8   0 4.36205 3.61617   2
   5  -8   0 13.1462  4.7912   5
   5  -8   0 6.19482 3.25494   1
   5  -8   0 -2.6701  3.6323   3
  -5   8   0 2.34709 3.11725   1
   4  -8   0 7.01693 3.13281   2
   4  -8   0 11.5595  4.2449   4
   4  -8   0 6.39400 3.95692   5
   4  -8   0 7.71439 3.31028   3
   4  -8   0 6.26261 3.03642   1
  -4   8   0 5.89273 2.70479   1
   3  -8   0 17.4237  5.9543   4
   3  -8   0 12.1291  2.9599   3
   3  -8   0 16.3083  2.7347   2
   3  -8   0 13.9309  3.4416   5
   3  -8   0 8.83669 3.25352   1
  -3   8   0 12.8489  3.2717   1
   2  -8   0 -3.1935  2.0765   4
   2  -8   0 4.91154 1.89730   2
   2  -8   0 1.48081 2.96592   5
   2  -8   0 1.75861 2.95098   1
  -2   8   0 1.06785 2.44534   1
   1  -8   0 14.9776  3.2275   1
   1  -8   0 10.4773  1.7331   2
   1  -8   0 14.0180  2.9263   5
   1  -8   0 11.7159  2.8543   4
  -1   8   0 14.1707  3.5053   1
   0  -8   0 35.5658  2.1402   2
   0  -8   0 34.9175  4.1945   1
   0  -8   0 36.2017  4.3701   4
   0  -8   0 46.5775  4.1554   5
   0   8   0 32.3423  3.9082   1
   0   8   0 31.4073  4.1889   5
  -1  -8   0 12.9696  2.9875   4
  -1  -8   0 10.9982  2.2027   5
  -1  -8   0 8.69139 0.85145   2
  -1  -8   0 9.29575 2.06121   3
   1   8   0 8.68885 3.07542   1
  -2  -8   0 409.613  35.842   5
  -2  -8   0 472.277  33.228   4
  -2  -8   0 334.519  21.767   2
  -2  -8   0 442.062  23.424   1
   2   8   0 404.474  21.365   1
  -3  -8   0 136.834  10.975   2
  -3  -8   0 133.289  13.349   5
  -3  -8   0 167.198  13.053   1
  -3  -8   0 156.787  13.462   4
   3   8   0 155.475   8.825   1
  -4  -8   0 234.510  15.159   4
  -4  -8   0 236.778  19.595   1
   4   8   0 233.699  12.098   1
  -5  -8   0 20.2318  5.1134   4
  -5  -8   0 20.5122  4.6804   1
   5   8   0 27.2382  4.5137   1
  -6  -8   0 18.6497  5.6218   4
   6   8   0 17.4896  4.5140   3
   6   8   0 15.5891  3.5238   1
  -7  -8   0 105.903  11.588   4
   7   8   0 100.427  10.203   3
   7   8   0 101.002  11.182   1
  -8  -8   0 -0.6028  5.8529   4
   8   8   0 6.57832 5.15622   3
   8   8   0 4.93365 3.92711   1
  -9  -8   0 20.9397  8.3602   4
   9   8   0 21.9860  4.9515   1
   9   8   0 24.3650  7.0747   3
 -10  -8   0 15.2331  8.9395   4
  10   8   0 21.7658  7.7358   3
   9  -9   0 -7.8285  6.6222   5
   9  -9   0 4.51979 6.35969   3
  -9   9   0 -4.0668  6.8553   7
   8  -9   0 -0.6801  5.0069   3
   8  -9   0 -3.2013  5.1316   2
   8  -9   0 8.50168 5.88685   5
   8  -9   0 3.60838 4.43842   1
  -8   9   0 6.30622 6.27811   7
   7  -9   0 61.2641  9.3583   3
   7  -9   0 42.2340  7.8826   5
   7  -9   0 43.1127  6.0047   1
   7  -9   0 45.8719  8.7437   2
   6  -9   0 39.1643  6.0064   1
   6  -9   0 50.5179  6.9226   3
   6  -9   0 63.5521  6.7892   2
   6  -9   0 46.1913  7.6431   5
   5  -9   0 83.5048  9.6150   3
   5  -9   0 91.0439  8.6713   4
   5  -9   0 97.1847  8.6290   5
   5  -9   0 75.3160  6.5940   2
   5  -9   0 67.1684  8.7822   1
  -5   9   0 67.1052 10.1071   1
   4  -9   0 9.91018 3.52340   1
   4  -9   0 11.2192  3.6287   4
   4  -9   0 9.66714 4.34077   5
   4  -9   0 11.8870  4.2086   3
   4  -9   0 8.68356 3.54681   2
  -4   9   0 7.27624 3.84033   1
   3  -9   0 1002.63   68.25   4
   3  -9   0 1005.49   79.91   1
   3  -9   0 921.144  63.305   2
   3  -9   0 1107.94   82.21   5
   3  -9   0 1056.71   93.49   3
  -3   9   0 1053.96   69.15   1
   2  -9   0 6.27097 3.54789   1
   2  -9   0 7.15576 2.12659   2
   2  -9   0 3.03035 2.40042   4
   2  -9   0 6.01624 2.87894   5
  -2   9   0 5.74391 3.78501   1
   1  -9   0 4.50125 3.51263   1
   1  -9   0 -0.2254  2.8029   5
   1  -9   0 6.01936 3.95266   4
   1  -9   0 3.10878 1.42598   2
  -1   9   0 5.02500 3.24607   1
   0  -9   0 1.02685 0.89634   2
   0  -9   0 5.24089 3.13253   4
   0  -9   0 -0.3410  1.6807   5
   0  -9   0 0.04540 3.29141   1
   0   9   0 3.56278 3.15326   1
  -1  -9   0 72.8926  6.3804   1
  -1  -9   0 57.0583  5.5465   5
  -1  -9   0 54.4020  5.3986   4
   1   9   0 58.9079  5.6277   1
  -2  -9   0 20.4620  4.9029   4
  -2  -9   0 13.0121  1.3878   2
   2   9   0 20.0380  3.7960   1
  -3  -9   0 623.001  43.342   4
  -3  -9   0 578.883  31.483   1
  -3  -9   0 521.556  46.304   5
   3   9   0 525.931  26.848   1
  -4  -9   0 -2.4513  3.0248   1
  -4  -9   0 -0.3419  3.3908   4
  -4  -9   0 -0.1032  1.7423   5
   4   9   0 3.88333 3.85926   1
  -5  -9   0 332.708  31.739   4
   5   9   0 309.589  24.164   1
  -6  -9   0 227.067  18.955   4
   6   9   0 230.133  14.818   1
  -7  -9   0 52.3911  8.9952   4
   7   9   0 41.0546  6.0265   1
  -8  -9   0 15.3409  7.7509   4
   8   9   0 5.08246 4.19340   1
   8   9   0 5.01181 5.23516   3
  -9  -9   0 51.9230  9.0801   4
   9   9   0 28.7670  9.2875   3
   9   9   0 42.2990  6.7856   1
 -10  -9   0 23.9230  9.3210   4
  10   9   0 12.0532  6.6738   3
   9 -10   0 115.571  14.853   5
  -9  10   0 116.104  18.061   7
   8 -10   0 24.4949  8.8810   5
   8 -10   0 21.6552  7.0409   3
   8 -10   0 33.7033  6.6023   1
   7 -10   0 3.78418 6.13393   3
   7 -10   0 1.57372 4.66765   2
   7 -10   0 7.82067 5.16812   1
   7 -10   0 7.83772 6.14248   5
   6 -10   0 361.161  28.503   3
   6 -10   0 360.980  37.575   1
   6 -10   0 402.120  31.009   5
   6 -10   0 365.147  31.543   2
   5 -10   0 25.0779  5.0189   2
   5 -10   0 27.0724  6.1245   4
   5 -10   0 42.6942  6.4887   5
   5 -10   0 15.1405  4.3128   3
   5 -10   0 34.7538  5.8008   1
   4 -10   0 2232.25  152.90   1
   4 -10   0 2386.43  167.93   2
   4 -10   0 2201.43  231.70   4
   4 -10   0 2240.18  108.96   5
   4 -10   0 2507.16  206.73   3
  -4  10   0 2379.30  203.92   1
   3 -10   0 13.8688  3.7820   5
   3 -10   0 0.90448 4.16787   4
   3 -10   0 17.6648  5.3101   1
   3 -10   0 8.14150 3.47055   3
   3 -10   0 4.92881 3.11504   2
  -3  10   0 9.36845 4.77690   1
   2 -10   0 0.10142 2.45626   4
   2 -10   0 4.99376 2.92949   5
   2 -10   0 0.82529 1.96938   2
   2 -10   0 5.40289 4.34010   1
  -2  10   0 -5.9338  3.5572   1
   1 -10   0 0.58503 1.30903   2
   1 -10   0 -3.4119  2.6764   5
   1 -10   0 -2.3955  2.7767   4
   1 -10   0 2.16459 2.81504   1
  -1  10   0 5.63260 2.65519   1
   0 -10   0 6.90541 2.46668   5
   0 -10   0 2.01781 3.16379   4
   0 -10   0 10.3578  3.3177   1
   0  10   0 9.58340 2.58718   1
  -1 -10   0 11.8920  3.6889   4
  -1 -10   0 9.24510 2.17006   5
  -1 -10   0 5.88356 3.32185   1
   1  10   0 6.57001 2.91492   1
  -2 -10   0 224.533  22.268   4
  -2 -10   0 213.043  13.487   1
  -2 -10   0 206.208  15.124   5
   2  10   0 251.371  17.319   1
  -3 -10   0 4.46264 3.01581   1
  -3 -10   0 8.81961 5.00422   4
   3  10   0 12.0658  3.4976   1
  -4 -10   0 2.78059 4.55449   4
  -4 -10   0 1.80178 2.96150   1
   4  10   0 10.0453  3.5503   1
  -5 -10   0 20.9388  6.0160   1
  -5 -10   0 12.7295  5.8493   4
  -6 -10   0 71.2100 10.4063   4
   6  10   0 56.1781  7.0476   1
  -7 -10   0 -9.3258  6.6293   4
   7  10   0 3.85578 3.81570   1
  -8 -10   0 25.4506  7.6781   4
   8  10   0 4.32870 4.50282   1
  -9 -10   0 28.2612 10.1786   4
   8 -11   0 6.78800 5.37983   1
   8 -11   0 9.44168 7.31164   5
   7 -11   0 27.7143  5.5379   1
   7 -11   0 13.0787  6.8910   5
   6 -11   0 9.13740 5.60911   1
   6 -11   0 12.7925  8.3513   5
   6 -11   0 -0.9325  7.5011   3
   5 -11   0 301.689  26.011   1
   5 -11   0 277.011  24.078   5
   5 -11   0 251.656  32.922   3
   5 -11   0 282.243  21.676   4
   4 -11   0 196.801  20.430   3
   4 -11   0 165.925  21.845   4
   4 -11   0 201.761  14.759   5
   4 -11   0 167.683  14.336   1
  -4  11   0 179.543  15.475   1
   3 -11   0 28.6997  5.9480   5
   3 -11   0 20.3953  4.5020   3
   3 -11   0 30.1278  6.5465   4
   3 -11   0 25.1451  4.5182   1
  -3  11   0 23.5894  5.5947   1
   2 -11   0 12.5624  4.1523   5
   2 -11   0 6.86368 4.71230   1
   2 -11   0 2.78627 4.26848   4
  -2  11   0 3.80339 4.59213   1
   1 -11   0 30.4893  5.3535   1
   1 -11   0 22.4638  4.8330   5
   1 -11   0 32.3501  4.7802   4
  -1  11   0 24.5086  5.0924   1
   0 -11   0 10.0814  3.7627   1
   0 -11   0 7.61047 4.11224   4
   0  11   0 7.79805 3.97714   1
  -1 -11   0 40.9511  4.1893   5
  -1 -11   0 42.5669  6.5857   1
  -1 -11   0 55.4956  6.5894   4
   1  11   0 46.7565  6.1022   1
  -2 -11   0 11.9654  4.0553   4
  -2 -11   0 0.93809 4.76054   1
   2  11   0 4.23085 2.70179   1
  -3 -11   0 41.3947  6.1574   1
  -3 -11   0 61.3025  8.9355   4
   3  11   0 56.3727  6.5821   1
  -4 -11   0 12.8947  5.3234   4
  -4 -11   0 21.2362  4.9280   1
   4  11   0 8.81008 3.79324   1
  -5 -11   0 87.9367 11.7954   4
  -5 -11   0 58.4868  6.9985   1
   5  11   0 72.0173  8.4165   1
  -6 -11   0 2.72612 6.20273   4
   6  11   0 5.32881 4.53330   1
  -7 -11   0 110.292  15.713   4
   7  11   0 126.304  14.747   1
  -8 -11   0 14.0507  7.6196   4
   8  11   0 16.3029  6.0372   1
  -9 -11   0 141.222  21.623   4
   9  11   0 136.281  15.927   1
   8 -12   0 11.1620  7.1981   1
   8 -12   0 11.8735  7.7525   5
   7 -12   0 5.44277 6.14407   1
   7 -12   0 1.58683 6.29876   5
   6 -12   0 91.9393 10.6934   1
   6 -12   0 112.581  17.226   5
   5 -12   0 27.0056  5.9354   1
   5 -12   0 21.8142  6.1000   5
   4 -12   0 249.156  23.402   1
   4 -12   0 260.506  20.714   5
  -4  12   0 279.020  30.271   1
   3 -12   0 0.81699 5.54506   4
   3 -12   0 8.76462 4.80379   1
   3 -12   0 -1.7177  3.4582   5
  -3  12   0 2.89307 4.13209   1
   2 -12   0 24.2411  5.5149   4
   2 -12   0 36.4912  6.3461   5
   2 -12   0 32.0427  6.4587   1
  -2  12   0 28.3922  6.5008   1
   1 -12   0 -5.9415  3.1711   5
   1 -12   0 -1.7422  3.9387   1
   1 -12   0 5.10458 3.49410   4
  -1  12   0 4.98296 3.34715   1
   0 -12   0 21.8797  6.5551   4
   0 -12   0 31.6030  6.0489   1
   0 -12   0 24.6355  5.0088   5
   0  12   0 34.0960  5.8627   1
  -1 -12   0 5.04898 4.89248   1
  -1 -12   0 0.54348 3.64776   4
   1  12   0 3.74302 3.31004   1
  -2 -12   0 14.7714  5.2843   4
  -2 -12   0 19.1690  5.0765   1
   2  12   0 20.2739  4.1990   1
  -3 -12   0 42.9620  7.1638   1
  -3 -12   0 37.7087  6.5511   4
   3  12   0 36.0374  6.5503   1
  -4 -12   0 5.90083 4.86637   1
  -4 -12   0 -4.5528  5.3202   4
   4  12   0 5.40950 4.07742   1
  -5 -12   0 6.72547 5.25868   4
  -5 -12   0 11.1051  6.7982   1
   5  12   0 -0.2252  2.9599   1
  -6 -12   0 27.5078  7.5610   4
   6  12   0 34.0338  6.6511   1
  -7 -12   0 16.2379  7.1380   4
   7  12   0 0.22988 5.00408   1
  -8 -12   0 120.821  17.389   4
   8  12   0 109.846  13.595   1
   7 -13   0 5.55650 6.17153   1
   7 -13   0 20.9349  7.6230   5
   6 -13   0 1.38361 6.63479   5
   6 -13   0 7.93023 6.26684   1
   5 -13   0 326.316  46.904   5
   5 -13   0 373.945  34.392   1
   4 -13   0 4.47336 5.73854   5
   4 -13   0 11.3712  5.3547   1
   3 -13   0 29.4247  5.6704   1
   3 -13   0 41.9887  6.7314   5
  -3  13   0 23.4206  7.1981   1
   2 -13   0 -1.0932  4.6680   1
   2 -13   0 -1.6300  3.9815   5
   2 -13   0 -4.8203  4.6339   4
  -2  13   0 5.82410 4.79623   1
   1 -13   0 12.7466  4.0467   4
   1 -13   0 6.39193 4.97873   1
  -1  13   0 3.27397 4.54087   1
   0 -13   0 15.4447  5.4071   1
   0 -13   0 10.1392  4.6509   4
   0  13   0 13.8261  5.5833   1
  -1 -13   0 60.6223  9.2007   4
  -1 -13   0 66.8371  9.0457   1
   1  13   0 74.8130  9.1479   1
  -2 -13   0 0.62575 5.76688   1
  -2 -13   0 -0.8597  5.3109   4
   2  13   0 1.05209 2.73675   1
  -3 -13   0 3.76865 5.32359   4
  -3 -13   0 10.3706  5.0570   1
   3  13   0 11.5889  4.6942   1
  -4 -13   0 3.12648 5.79531   4
  -4 -13   0 0.86335 6.74748   1
   4  13   0 -1.9040  4.3472   1
  -5 -13   0 1.65062 5.27023   4
   5  13   0 -4.5047  3.7552   1
  -6 -13   0 9.87472 7.62128   4
   6  13   0 1.79468 5.67170   1
  -7 -13   0 -8.4352  7.5037   4
   7  13   0 -5.6729  6.3796   1
   6 -14   0 82.4930 12.9363   5
   6 -14   0 89.4989 13.9498   1
   5 -14   0 29.7605  9.6216   5
   5 -14   0 52.6612  9.7138   1
   4 -14   0 30.0521  7.0556   1
   4 -14   0 25.1558  6.0618   5
   3 -14   0 4.12918 4.43071   1
  -3  14   0 14.4690  6.7924   1
   2 -14   0 111.497  13.978   1
   1 -14   0 4.31722 4.58284   4
   1 -14   0 1.06515 5.36527   1
  -1  14   0 -0.8142  5.2532   1
   0 -14   0 276.481  29.200   4
   0 -14   0 348.739  33.706   1
   0  14   0 340.456  29.741   1
  -1 -14   0 3.57498 5.54039   1
  -1 -14   0 -9.8033  4.3256   4
   1  14   0 1.07462 3.40341   1
  -2 -14   0 14.9792  6.7121   1
  -2 -14   0 3.84519 5.31908   4
   2  14   0 9.91110 3.44903   1
  -3 -14   0 12.2959  6.2897   4
  -3 -14   0 18.2843  7.4554   1
   3  14   0 20.8098  5.4923   1
  -4 -14   0 25.5968  8.3938   1
  -4 -14   0 27.8345  7.5185   4
   4  14   0 7.06212 6.63270   1
  -5 -14   0 19.6286  8.0825   4
   5  14   0 10.5275  5.8821   1
  -6 -14   0 15.9499  9.1533   4
   6  14   0 24.4231  9.2617   1
   5 -15   0 95.5405 13.9991   1
   4 -15   0 13.0790  7.1811   1
   3 -15   0 4.26665 6.54364   1
  -3  15   0 23.1726  8.9560   1
   2 -15   0 3.75914 4.07472   1
  -2  15   0 3.92470 7.04576   1
   1 -15   0 52.8867 10.2413   1
  -1  15   0 57.1858 10.3724   1
   0 -15   0 -3.8377  6.7659   1
   0  15   0 0.30431 7.38773   1
  -1 -15   0 -5.4513  6.6329   1
  -1 -15   0 -4.1190  5.2738   4
   1  15   0 8.20512 6.09373   1
  -2 -15   0 -0.2228  6.4287   4
  -2 -15   0 2.49080 5.59059   1
   2  15   0 4.87477 5.27493   1
  -3 -15   0 27.9282  8.9168   1
  -3 -15   0 6.83101 8.10341   4
   3  15   0 30.8757  8.3007   1
  -4 -15   0 14.4808  7.6659   4
  -4 -15   0 -1.3989  7.9473   1
   4  15   0 16.5469  7.1554   1
  -5 -15   0 37.6813  9.1297   4
   5  15   0 28.0185  7.5490   1
   3 -16   0 11.4478  6.4129   1
   2 -16   0 3.01434 7.43421   1
  -2  16   0 0.18774 8.14018   1
   1 -16   0 7.19966 7.11091   1
  -1  16   0 0.96510 6.21821   1
   0 -16   0 82.9201 14.3315   1
   0  16   0 136.523  17.689   1
  -1 -16   0 10.5878  6.8583   1
   1  16   0 0.96266 6.26687   1
  -2 -16   0 8.34067 7.16987   1
   2  16   0 16.3862  7.3606   1
  -3 -16   0 -9.5020  7.7173   4
  -3 -16   0 9.19853 9.05782   1
   3  16   0 -0.4405  7.5950   1
  -4 -16   0 0.39921 5.00642   1
  -4 -16   0 0.20713 7.95741   4
   3  16  -1 41.8505  9.1697   1
  -3 -16   1 18.1470  8.9479   1
   2  16  -1 -7.2236  8.4003   1
  -2 -16   1 1.86167 9.78162   1
   1  16  -1 59.2149 11.8681   1
  -1 -16   1 60.5289 10.6710   1
   0  16  -1 7.23757 8.45398   1
   0 -16   1 -6.0136  8.5106   1
  -1  16  -1 65.3793 11.4552   1
   1 -16   1 107.253  17.105   1
  -2  16  -1 -2.7126  8.0021   1
   2 -16   1 13.5091  9.2192   1
   3 -16   1 84.0951 12.4283   1
   5  15  -1 23.5934  8.5170   1
  -5 -15   1 27.9248  8.9317   4
   4  15  -1 46.7563  7.7904   1
  -4 -15   1 50.4950 11.6078   4
  -4 -15   1 38.0523  8.6341   1
   3  15  -1 2.76882 6.13794   1
  -3 -15   1 -1.2031  6.4214   1
  -3 -15   1 2.60801 7.14185   4
   2  15  -1 86.3145 11.7477   1
  -2 -15   1 68.6085 11.7710   4
  -2 -15   1 72.7689 13.5237   1
   1  15  -1 -0.3419  7.3580   1
  -1 -15   1 -2.0647  3.7854   4
  -1 -15   1 9.80364 7.63937   1
   0  15  -1 170.576  16.885   1
   0 -15   1 146.368  17.963   1
  -1  15  -1 -2.4872  6.7101   1
   1 -15   1 6.29810 7.75995   1
  -2  15  -1 5.52349 6.17629   1
   2 -15   1 -0.3937  3.8696   1
  -3  15  -1 10.3533  8.4896   1
   3 -15   1 22.2471  9.0299   1
   4 -15   1 37.7124  8.5665   1
   5 -15   1 22.6193  9.4715   1
   6  14  -1 -0.6875  5.9442   1
  -6 -14   1 -7.8416  7.7743   4
   5  14  -1 7.30790 6.75449   1
  -5 -14   1 25.6648  8.3005   4
   4  14  -1 38.8600  8.6075   1
  -4 -14   1 30.6919  7.2916   4
  -4 -14   1 25.2904  7.5098   1
   3  14  -1 82.7029 11.4332   1
  -3 -14   1 74.3495 10.8220   4
  -3 -14   1 57.0826  8.9185   1
   2  14  -1 6.19827 5.58452   1
  -2 -14   1 14.2254  7.0104   1
  -2 -14   1 6.91750 6.81693   4
   1  14  -1 2.78176 4.88376   1
  -1 -14   1 3.40458 5.49161   4
  -1 -14   1 0.30477 6.04089   1
   0  14  -1 -3.4160  4.9990   1
   0 -14   1 -3.1548  4.7949   4
   0 -14   1 2.79987 5.12602   1
  -1  14  -1 131.247  17.848   1
   1 -14   1 129.453  16.062   1
  -2  14  -1 9.86399 6.71682   1
   2 -14   1 4.38040 3.97932   1
  -3  14  -1 7.50152 6.55710   1
   3 -14   1 5.16666 5.58640   1
   4 -14   1 13.9599  7.4536   1
   4 -14   1 19.0565  7.1979   5
   5 -14   1 -3.0091  7.3734   5
   5 -14   1 -1.7022  6.9151   1
   6 -14   1 2.10208 7.57143   1
   6 -14   1 3.20848 9.61598   5
   7  13  -1 9.76016 6.50650   1
  -7 -13   1 6.35919 7.94731   4
   6  13  -1 2.48840 6.29154   1
  -6 -13   1 5.96088 6.88960   4
   5  13  -1 -6.2948  5.4006   1
  -5 -13   1 3.67044 6.46837   4
   4  13  -1 189.637  22.878   1
  -4 -13   1 175.021  19.587   1
  -4 -13   1 158.904  23.020   4
   3  13  -1 3.07157 4.11297   1
  -3 -13   1 12.6168  5.8145   4
  -3 -13   1 0.50595 4.60559   1
   2  13  -1 0.93134 4.07412   1
  -2 -13   1 -3.2919  5.8515   1
  -2 -13   1 4.14966 5.01947   4
   1  13  -1 -3.9922  4.1131   1
  -1 -13   1 5.41432 4.82209   4
  -1 -13   1 6.09915 3.50366   1
   0  13  -1 207.439  16.378   1
   0 -13   1 191.371  17.710   4
   0 -13   1 220.480  19.498   1
  -1  13  -1 4.32356 4.20952   1
   1 -13   1 12.3001  5.9717   1
   1 -13   1 8.48202 5.07770   4
  -2  13  -1 17.3679  6.7571   1
   2 -13   1 12.6886  6.0782   1
   2 -13   1 16.3047  5.2516   5
  -3  13  -1 -3.3529  4.2983   1
   3 -13   1 -4.1646  4.8324   5
   3 -13   1 2.40450 5.19777   1
   4 -13   1 86.1755 11.1231   5
   4 -13   1 97.5941 11.3812   1
   5 -13   1 15.7473  6.7044   1
   5 -13   1 3.74323 5.99524   5
   6 -13   1 37.3202 10.6289   5
   6 -13   1 58.4564 10.3409   1
   7 -13   1 1.61023 7.56963   5
   7 -13   1 -0.6651  6.8144   1
   8  12  -1 -0.9527  5.7786   1
  -8 -12   1 -11.404   8.069   4
   7  12  -1 13.8518  5.3259   1
  -7 -12   1 8.55535 7.99041   4
   6  12  -1 22.8287  6.1703   1
  -6 -12   1 37.2723  8.0404   4
   5  12  -1 33.6927  5.7554   1
  -5 -12   1 42.2321  8.1068   4
  -5 -12   1 49.5254  7.3776   1
   4  12  -1 1.09982 4.71840   1
  -4 -12   1 8.16719 5.23427   1
  -4 -12   1 -1.6256  4.6495   4
   3  12  -1 36.4549  6.4063   1
  -3 -12   1 27.9305  6.7154   4
  -3 -12   1 41.2328  6.3819   1
   2  12  -1 1.47442 2.61015   1
  -2 -12   1 -5.5211  3.9626   1
  -2 -12   1 -3.6525  5.2995   4
   1  12  -1 42.3422  5.7418   1
  -1 -12   1 57.0519  7.3546   1
  -1 -12   1 45.8463  6.8552   4
   0  12  -1 -1.0827  3.7841   1
   0 -12   1 2.11956 3.50240   5
   0 -12   1 -5.5329  4.2015   4
   0 -12   1 1.71088 4.68848   1
  -1  12  -1 242.881  17.831   1
   1 -12   1 289.399  24.146   5
   1 -12   1 255.146  23.953   4
   1 -12   1 254.850  21.696   1
  -2  12  -1 3.77995 4.20366   1
   2 -12   1 4.27802 4.08272   4
   2 -12   1 -0.1190  3.3160   5
   2 -12   1 5.32284 4.21408   1
  -3  12  -1 145.597  13.099   1
   3 -12   1 104.870  12.195   5
   3 -12   1 114.608  11.391   1
   3 -12   1 122.382  17.052   4
  -4  12  -1 16.3106  6.4184   1
   4 -12   1 27.5355  6.7502   5
   4 -12   1 21.1672  5.3879   1
   5 -12   1 -0.2315  3.4267   1
   5 -12   1 2.12725 5.26887   5
   6 -12   1 6.25965 5.54365   1
   6 -12   1 -3.9487  5.2153   5
   7 -12   1 7.80876 5.26702   1
   7 -12   1 16.6549  8.4064   5
   8 -12   1 22.2734  8.2164   5
   8 -12   1 18.7970  6.1277   1
  -9 -11   1 -1.7237  8.9522   4
   8  11  -1 122.998  14.811   1
  -8 -11   1 131.815  21.285   4
   7  11  -1 13.6176  4.7338   1
  -7 -11   1 10.7654  6.2729   4
   6  11  -1 171.965  13.410   1
  -6 -11   1 145.014  13.621   4
   5  11  -1 2.47767 3.39763   1
  -5 -11   1 2.21268 4.91524   4
  -5 -11   1 -3.1060  3.4046   1
   4  11  -1 4.22646 4.87316   1
  -4 -11   1 -1.2523  5.5508   1
  -4 -11   1 14.3314  5.1359   4
   3  11  -1 2.30750 3.18588   1
  -3 -11   1 5.70637 4.64584   1
  -3 -11   1 2.51615 4.68936   4
   2  11  -1 134.557  11.020   1
  -2 -11   1 160.443  18.371   4
  -2 -11   1 139.069  10.986   1
   1  11  -1 -0.7906  3.8683   1
  -1 -11   1 -1.7775  2.4375   5
  -1 -11   1 1.12944 4.18541   4
  -1 -11   1 -0.6751  4.0944   1
   0  11  -1 126.729  12.516   1
   0 -11   1 112.285   8.519   1
   0 -11   1 120.995  15.173   4
   0 -11   1 122.621  11.222   5
  -1  11  -1 2.64451 3.30353   1
   1 -11   1 2.13223 3.35933   5
   1 -11   1 -0.5427  3.9100   1
   1 -11   1 -2.2956  2.7631   4
  -2  11  -1 513.412  41.239   1
   2 -11   1 546.096  47.533   1
   2 -11   1 502.633  43.389   5
   2 -11   1 506.909  57.684   4
  -3  11  -1 61.1197  8.1212   1
   3 -11   1 62.4786  8.3277   4
   3 -11   1 76.4541 10.2033   5
   3 -11   1 54.1155  8.5437   3
   3 -11   1 73.4324  9.0110   1
  -4  11  -1 5.90259 5.47574   1
   4 -11   1 15.2631  5.2234   4
   4 -11   1 16.6505  5.5352   5
   4 -11   1 15.4531  4.0552   1
   5 -11   1 65.9743  8.5048   5
   5 -11   1 52.1987  7.3436   1
   6 -11   1 249.911  23.709   1
   6 -11   1 261.548  29.501   5
   7 -11   1 7.58654 5.79290   5
   7 -11   1 8.96011 5.84845   1
   8 -11   1 7.22144 7.06893   5
   8 -11   1 8.90759 5.56906   1
   9  10  -1 33.2501  6.3303   1
  -9 -10   1 33.0667 11.1050   4
   8  10  -1 -1.9953  4.7145   1
  -8 -10   1 12.0993  7.2103   4
   7  10  -1 76.6289  7.3034   1
  -7 -10   1 58.6542 10.1789   4
   6  10  -1 1.12998 3.42074   1
  -6 -10   1 -2.6620  5.3597   4
   5  10  -1 323.080  23.474   1
  -5 -10   1 360.793  35.586   4
  -5 -10   1 293.648  29.419   1
   4  10  -1 -0.7737  3.6249   1
  -4 -10   1 3.94625 3.86926   4
  -4 -10   1 9.48444 4.94581   1
   3  10  -1 105.211   8.380   1
  -3 -10   1 106.961  11.950   4
  -3 -10   1 83.5744 10.5075   1
  -3 -10   1 84.4819  8.5185   5
   2  10  -1 3.84655 3.11013   1
  -2 -10   1 -2.5533  3.0735   4
  -2 -10   1 6.99987 3.87713   1
  -2 -10   1 0.01683 2.16766   5
   1  10  -1 193.409  11.664   1
  -1 -10   1 178.284  17.751   5
  -1 -10   1 200.962  13.984   1
  -1 -10   1 212.456  20.466   4
   0  10  -1 -1.7036  2.8460   1
   0 -10   1 0.24335 2.14924   5
   0 -10   1 -2.7569  3.4264   1
   0 -10   1 9.92063 4.17556   4
  -1  10  -1 76.0558  7.5824   1
   1 -10   1 67.6774  6.1121   5
   1 -10   1 66.4506  7.1318   1
   1 -10   1 69.1293  6.8067   4
   1 -10   1 67.6394  5.7114   2
  -2  10  -1 1.75481 3.32930   1
   2 -10   1 -0.9860  3.6432   1
   2 -10   1 -1.0730  1.6767   2
   2 -10   1 -1.4146  3.0795   5
   2 -10   1 3.10524 3.06645   4
  -3  10  -1 1058.10   66.20   1
   3 -10   1 1059.45   75.33   4
   3 -10   1 1007.89   78.14   5
   3 -10   1 1075.81  103.66   3
   3 -10   1 989.069  74.907   2
   3 -10   1 1120.05   82.57   1
  -4  10  -1 150.230  13.882   1
   4 -10   1 163.491  12.539   4
   4 -10   1 160.771  14.229   2
   4 -10   1 153.188  10.789   5
   4 -10   1 171.133  15.263   1
   4 -10   1 158.568  13.854   3
   5 -10   1 5.36033 4.17742   3
   5 -10   1 -1.2208  3.8766   2
   5 -10   1 -3.7289  4.5260   5
   5 -10   1 4.97085 4.34155   1
   6 -10   1 19.0696  4.8780   1
   6 -10   1 28.4812  5.9805   3
   6 -10   1 24.7785  4.9845   2
   6 -10   1 24.7025  7.5637   5
   7 -10   1 11.2290  5.4238   5
   7 -10   1 1.38790 4.35620   1
   7 -10   1 -5.2997  5.3623   2
   7 -10   1 2.39280 5.66715   3
   8 -10   1 14.0973  5.9250   1
   8 -10   1 10.0868  7.0280   5
   8 -10   1 -2.4065  5.1793   2
  -9  10  -1 58.5637  9.8392   7
   9 -10   1 48.3789  9.7310   5
  10   9  -1 6.57756 7.75463   3
 -10  -9   1 33.9615  9.7175   4
   9   9  -1 25.2620  8.4239   3
   9   9  -1 26.4633  5.3845   1
  -9  -9   1 20.9860  8.7957   4
   8   9  -1 16.0677  5.2687   1
   8   9  -1 20.2933  6.8191   3
  -8  -9   1 7.54133 6.61912   4
   7   9  -1 2.35848 3.42907   1
   7   9  -1 1.21751 4.77444   3
  -7  -9   1 6.14699 5.07081   4
   6   9  -1 2.39327 3.58161   1
  -6  -9   1 2.65076 5.57943   4
   5   9  -1 687.622  36.530   1
  -5  -9   1 709.516  51.330   4
  -5  -9   1 704.250  58.115   1
   4   9  -1 7.11549 2.93413   1
  -4  -9   1 2.25547 3.19409   1
  -4  -9   1 5.50954 3.80708   4
   3   9  -1 65.0287  5.3147   1
  -3  -9   1 57.3502  6.8459   5
  -3  -9   1 58.7338  5.8133   4
  -3  -9   1 83.5560  7.9687   1
   2   9  -1 1125.80   44.48   1
  -2  -9   1 1035.80   94.10   5
  -2  -9   1 1065.49   63.59   1
  -2  -9   1 1117.51   86.78   4
   1   9  -1 7.38693 3.39448   1
  -1  -9   1 5.41490 2.06828   5
  -1  -9   1 3.22689 1.17763   2
  -1  -9   1 10.4511  3.2860   4
  -1  -9   1 4.94146 2.15574   3
  -1  -9   1 7.22725 3.03356   1
   0   9  -1 8.38537 3.26658   1
   0  -9   1 6.20007 1.28090   2
   0  -9   1 8.38565 3.76575   1
   0  -9   1 10.1070  3.3072   4
   0  -9   1 7.21133 2.12984   5
  -1   9  -1 4.13500 3.60869   1
   1  -9   1 3.28994 1.58948   2
   1  -9   1 1.22833 2.31979   5
   1  -9   1 3.36836 2.39753   4
   1  -9   1 4.31943 3.23089   1
  -2   9  -1 41.7696  5.0549   1
   2  -9   1 42.0124  4.4475   4
   2  -9   1 38.5341  4.4332   5
   2  -9   1 39.5258  3.8864   2
   2  -9   1 37.7265  4.1894   1
  -3   9  -1 2.81433 3.44335   1
   3  -9   1 11.8751  4.4613   4
   3  -9   1 7.61607 3.58795   1
   3  -9   1 5.14969 2.89585   5
   3  -9   1 9.64445 2.75046   2
   3  -9   1 7.87961 2.43477   3
  -4   9  -1 31.7155  4.8428   1
   4  -9   1 36.5275  4.8932   2
   4  -9   1 37.0826  5.6703   1
   4  -9   1 37.5824  5.3938   3
   4  -9   1 29.3823  5.5733   5
   4  -9   1 35.0496  5.6281   4
   5  -9   1 1.21108 3.62963   1
   5  -9   1 2.55204 3.92133   5
   5  -9   1 0.23570 3.21734   3
   5  -9   1 -5.9735  3.6269   2
   6  -9   1 322.313  25.144   1
   6  -9   1 348.099  32.650   3
   6  -9   1 339.709  26.774   5
   6  -9   1 317.989  20.462   2
   7  -9   1 0.99120 4.77412   2
   7  -9   1 -0.5662  5.2069   3
   7  -9   1 11.9544  5.7138   5
   7  -9   1 -6.0356  3.5584   1
   8  -9   1 34.0414  7.9849   3
   8  -9   1 17.5880  5.7957   1
   8  -9   1 33.5936  7.6518   5
   8  -9   1 20.1438  7.4805   2
  -9   9  -1 -3.3399  7.0838   7
   9  -9   1 -2.0797  6.9160   3
   9  -9   1 15.6956  7.3009   5
   9  -9   1 -2.5537  6.3915   2
  10   8  -1 14.8005  9.3882   3
 -10  -8   1  7.4531 10.0208   4
   9   8  -1 74.1752  9.2464   1
   9   8  -1 65.2267 11.2322   3
  -9  -8   1 64.1475 13.0700   4
   8   8  -1 0.55359 4.22528   1
   8   8  -1 9.08063 5.15415   3
  -8  -8   1 4.42934 6.60808   4
   7   8  -1 31.4605  4.9080   1
   7   8  -1 35.4916  6.7639   3
  -7  -8   1 39.5773  6.5302   4
   6   8  -1 66.5215  6.4376   1
   6   8  -1 73.2410  8.7247   3
  -6  -8   1 63.8519  7.5719   4
   5   8  -1 1400.49   63.03   1
   5   8  -1 1451.31  104.02   3
  -5  -8   1 1342.51   92.78   4
  -5  -8   1 1442.78   97.69   1
   4   8  -1 9.48194 3.27876   1
  -4  -8   1 4.42167 3.88263   4
  -4  -8   1 7.91420 3.51211   1
   3   8  -1 966.702  49.903   1
  -3  -8   1 998.635  72.339   1
  -3  -8   1 927.200  88.296   5
  -3  -8   1 986.389  90.374   4
   2   8  -1 43.4313  4.8521   1
  -2  -8   1 53.0970  5.7832   1
  -2  -8   1 35.4356  3.2014   2
  -2  -8   1 42.2728  4.7883   5
  -2  -8   1 53.1681  5.4592   4
   1   8  -1 405.775  20.300   1
  -1  -8   1 396.739  33.353   3
  -1  -8   1 436.337  22.908   1
  -1  -8   1 465.639  34.524   4
  -1  -8   1 395.325  24.969   5
   0   8  -1 5.00261 2.82166   1
   0  -8   1 10.3627  3.0398   4
   0  -8   1 3.98958 1.46602   2
   0  -8   1 9.67797 3.23236   1
   0  -8   1 6.34495 2.35339   5
  -1   8  -1 13.5660  3.6617   1
   1  -8   1 12.6409  3.4080   1
   1  -8   1 10.2457  2.6924   5
   1  -8   1 4.48897 2.02696   4
   1  -8   1 6.44934 2.14232   2
  -2   8  -1 24.9033  4.1479   1
   2  -8   1 20.8484  3.2064   4
   2  -8   1 16.6767  2.8590   2
   2  -8   1 14.1115  3.1869   5
   2  -8   1 21.1759  4.0587   1
  -3   8  -1 87.1399  7.1351   1
   3  -8   1 88.4004  9.1164   4
   3  -8   1 78.6026  7.5748   1
   3  -8   1 78.4969  5.5442   2
   3  -8   1 95.4886  6.8967   3
   3  -8   1 78.7873  8.1442   5
  -4   8  -1 3.72075 2.97189   1
   4  -8   1 4.62859 2.71538   3
   4  -8   1 8.82639 3.26353   5
   4  -8   1 7.16711 3.22567   2
   4  -8   1 11.9945  3.5320   4
   4  -8   1 10.9318  3.4966   1
  -5   8  -1 -2.0404  2.8457   1
   5  -8   1 3.45604 3.33756   2
   5  -8   1 1.83551 3.06666   3
   5  -8   1 5.18153 3.34385   1
   5  -8   1 5.94523 4.09597   5
   6  -8   1 15.3747  3.8248   1
   6  -8   1 14.2362  4.8004   2
   6  -8   1 17.5678  5.4574   5
   6  -8   1 14.2040  3.7944   3
   7  -8   1 846.673  66.699   3
   7  -8   1 817.059  57.202   2
   7  -8   1 840.503  82.293   5
   7  -8   1 754.152  62.005   1
  -8   8  -1 331.572  32.661   7
   8  -8   1 337.294  29.840   2
   8  -8   1 364.883  29.877   5
   8  -8   1 379.977  29.419   3
   8  -8   1 289.536  27.136   1
  -9   8  -1 41.7426 10.7454   7
   9  -8   1 38.2112  7.5482   2
   9  -8   1 35.6776  8.8452   5
   9  -8   1 41.6557  8.8729   3
 -10   8  -1 75.5789 11.9850   7
  10  -8   1 55.8433 10.1648   5
  10  -8   1 51.6796 13.2940   3
  10   7  -1 6.03364 7.14268   3
 -10  -7   1 4.52803 8.18896   4
   9   7  -1 34.9028  8.3017   3
   9   7  -1 30.2138  5.6590   1
  -9  -7   1 43.6775  9.1421   4
   8   7  -1 0.71900 4.58782   3
   8   7  -1 5.50121 3.48323   1
  -8  -7   1 3.67223 6.10477   4
   7   7  -1 4.05679 3.26608   1
   7   7  -1 7.88901 4.28787   3
  -7  -7   1 13.9121  6.6545   4
   6   7  -1 199.459  17.799   3
   6   7  -1 168.963  11.500   1
  -6  -7   1 172.807  17.082   1
  -6  -7   1 194.063  15.850   4
   5   7  -1 10.7212  3.5515   3
   5   7  -1 17.0574  2.9331   1
  -5  -7   1 14.4504  3.3764   1
  -5  -7   1 12.2195  4.7342   4
   4   7  -1 327.360  14.931   1
   4   7  -1 354.048  35.129   3
  -4  -7   1 334.749  21.419   1
  -4  -7   1 331.934  34.052   4
   3   7  -1 25.9254  3.9452   1
  -3  -7   1 19.5648  2.5003   2
  -3  -7   1 20.2003  3.8484   1
   2   7  -1 2627.23   87.36   1
  -2  -7   1 2511.39  251.75   5
  -2  -7   1 2642.17  140.45   1
  -2  -7   1 2623.77  163.01   3
  -2  -7   1 2195.73  148.97   2
  -2  -7   1 2530.56  138.61   4
   1   7  -1 3.85438 2.74497   1
  -1  -7   1 7.21618 1.61105   3
  -1  -7   1 4.21886 2.76527   1
  -1  -7   1 10.2004  2.5167   5
  -1  -7   1 7.76337 2.65803   4
   0   7  -1 1786.23  115.40   5
   0   7  -1 2063.63   63.49   1
   0  -7   1 2005.07  127.99   4
   0  -7   1 1790.87  117.98   5
   0  -7   1 1765.14   82.55   1
   0  -7   1 1804.63  101.23   2
  -1   7  -1 -0.7518  1.8421   1
  -1   7  -1 0.08012 1.94054   4
   1  -7   1 0.81514 1.26677   2
   1  -7   1 -1.0710  2.2618   4
   1  -7   1 2.27134 2.45380   1
   1  -7   1 1.42580 1.84440   5
  -2   7  -1 104.101  14.473   4
  -2   7  -1 120.065   7.017   1
   2  -7   1 113.336   7.369   2
   2  -7   1 116.609   7.243   1
   2  -7   1 113.557   6.976   5
   2  -7   1 121.541   9.693   4
  -3   7  -1 0.58319 2.38268   1
   3  -7   1 -1.6298  2.9888   5
   3  -7   1 -0.4710  1.9287   2
   3  -7   1 3.59011 2.09307   1
   3  -7   1 -3.5272  2.3055   4
   3  -7   1 -2.4345  1.8295   3
  -4   7  -1 1.26574 2.20716   1
   4  -7   1 0.38953 3.37963   4
   4  -7   1 0.06881 2.87283   2
   4  -7   1 2.35326 2.32536   1
   4  -7   1 3.46056 3.57334   5
   4  -7   1 0.74698 2.32553   3
  -5   7  -1 3.83799 2.40640   1
   5  -7   1 4.81630 3.49693   2
   5  -7   1 6.48451 2.62377   1
   5  -7   1 9.27441 3.84793   3
   5  -7   1 2.54337 3.01068   5
   6  -7   1 0.44776 4.04995   2
   6  -7   1 5.90138 3.14591   1
   6  -7   1 4.66536 4.21849   3
   6  -7   1 6.27020 4.22390   5
   7  -7   1 568.142  32.867   2
   7  -7   1 547.617  33.190   3
   7  -7   1 480.472  45.439   1
   7  -7   1 561.560  45.778   5
  -8   7  -1 588.153  44.368   7
   8  -7   1 592.570  46.532   2
   8  -7   1 609.061  36.831   5
   8  -7   1 546.924  71.495   1
   8  -7   1 648.755  58.791   3
  -9   7  -1 244.058  28.650   7
   9  -7   1 230.554  26.396   2
   9  -7   1 226.074  34.758   3
   9  -7   1 247.846  25.194   5
 -10   7  -1 93.3159 15.1934   7
  10  -7   1 65.0321  8.2567   5
  10  -7   1 95.3106 13.6397   3
  11   6  -1 20.8695  8.8896   3
 -11  -6   1 12.3561 10.2244   4
  10   6  -1 12.3491  7.7910   3
 -10  -6   1 8.78937 7.25243   4
   9   6  -1 81.9812 10.8949   3
   9   6  -1 84.4055  7.4861   1
  -9  -6   1 80.5891 10.8585   4
   8   6  -1 46.0056  6.2377   1
   8   6  -1 58.5681  6.7372   3
  -8  -6   1 64.8482  9.7937   4
   7   6  -1 3.13124 2.83419   1
   7   6  -1 0.80855 3.54187   3
  -7  -6   1 2.00143 4.17334   4
   6   6  -1 30.3380  3.5738   1
   6   6  -1 28.5651  3.8874   3
  -6  -6   1 19.2648  4.2655   1
  -6  -6   1 36.0082  5.7700   4
   5   6  -1 74.7948  5.3759   1
   5   6  -1 56.9232  6.9637   1
   5   6  -1 74.8367  6.3530   3
   5   6  -1 61.0891  7.0060   8
  -5  -6   1 80.9104  6.3057   1
  -5  -6   1 86.0752  9.2670   4
   4   6  -1 39.1443  4.1430   3
   4   6  -1 37.2638  5.1360   8
   4   6  -1 44.6610  3.9900   1
  -4  -6   1 42.3456  4.7281   4
  -4  -6   1 34.4420  3.2215   1
   3   6  -1 26.5090  3.3189   3
   3   6  -1 21.8784  3.3617   1
  -3  -6   1 24.4056  2.8867   4
  -3  -6   1 26.7784  3.8869   1
  -3  -6   1 19.6162  2.7979   2
   2   6  -1 1.55412 2.04973   1
  -2  -6   1 2.60300 1.78907   3
  -2  -6   1 5.70006 2.13297   4
  -2  -6   1 5.12018 2.35923   1
  -2  -6   1 -0.2300  1.2726   2
   1   6  -1 2744.68  105.53   1
  -1  -6   1 2610.58  132.03   3
  -1  -6   1 2827.65  153.02   1
  -1  -6   1 2631.37  208.88   5
  -1  -6   1 2851.38  270.50   4
   0   6  -1 -0.1721  1.3488   5
   0   6  -1 1.56443 1.46536   4
   0   6  -1 -0.3277  2.7098   1
   0  -6   1 0.36098 2.42136   5
   0  -6   1 1.50685 1.13683   2
   0  -6   1 1.57359 2.83161   1
  -1   6  -1 1035.69  114.98   5
  -1   6  -1 912.749  85.284   4
  -1   6  -1 914.464  34.261   1
   1  -6   1 893.637  43.094   5
   1  -6   1 937.112  65.182   4
   1  -6   1 845.895  39.811   1
   1  -6   1 972.742  56.413   2
  -2   6  -1 1.40957 1.63839   4
  -2   6  -1 6.98734 3.58162   1
   2  -6   1 4.75184 3.56497   1
   2  -6   1 5.15190 3.34825   5
   2  -6   1 4.66457 4.76938   4
   2  -6   1 4.11240 2.01661   2
  -3   6  -1 398.561  43.125   4
  -3   6  -1 417.136  19.625   1
   3  -6   1 378.896  20.572   1
   3  -6   1 385.787  14.755   2
   3  -6   1 403.986  40.419   4
   3  -6   1 373.773  20.467   5
   3  -6   1 360.003  22.843   1
   3  -6   1 412.700  30.815   3
  -4   6  -1 28.1608  3.3284   1
   4  -6   1 34.5190  4.1950   3
   4  -6   1 29.6037  4.0278   1
   4  -6   1 26.5223  3.2160   1
   4  -6   1 33.5979  4.2908   2
   4  -6   1 27.4553  4.1316   5
  -5   6  -1 14.2027  2.6951   1
   5  -6   1 13.7277  1.9898   6
   5  -6   1 15.6542  2.9839   1
   5  -6   1 15.5674  3.3697   2
   5  -6   1 9.28799 2.77659   1
   5  -6   1 14.1232  4.0043   5
   5  -6   1 15.6509  3.1948   3
   6  -6   1 3.17106 3.77528   3
   6  -6   1 0.33433 3.13306   2
   6  -6   1 3.83096 3.38946   5
   6  -6   1 4.12286 2.35207   1
   7  -6   1 589.945  43.309   1
   7  -6   1 612.891  37.240   3
   7  -6   1 618.296  33.008   2
   7  -6   1 630.698  57.217   5
  -8   6  -1 54.8709  7.1098   7
   8  -6   1 50.6112  6.7610   1
   8  -6   1 64.1861  7.6102   3
   8  -6   1 44.5780  6.8435   2
   8  -6   1 71.3035  8.8837   5
  -9   6  -1 168.382  17.020   7
   9  -6   1 124.633  16.044   3
   9  -6   1 138.421  15.862   5
   9  -6   1 165.657  13.367   2
 -10   6  -1 26.3635  9.1051   7
  10  -6   1 37.3786  8.4731   2
  10  -6   1 29.6785  7.9310   5
  10  -6   1 36.6926  9.1627   3
  11   5  -1 30.3073  9.2914   3
 -11  -5   1 38.3977  9.8469   4
 -11  -5   1 22.9496  8.9939   7
  10   5  -1 44.8476  8.4911   3
 -10  -5   1 30.2336  8.4837   4
 -10  -5   1 23.8786  9.7136   7
   9   5  -1 80.6585  9.5793   3
   9   5  -1 90.2204  8.4033   1
  -9  -5   1 102.365  11.275   4
  -9  -5   1 71.6964  9.3056   7
   8   5  -1 3.44345 4.81622   3
   8   5  -1 11.0125  3.6338   1
  -8  -5   1 4.46737 4.89494   4
  -8  -5   1 15.4044  5.5824   7
   7   5  -1 33.6273  6.2600   3
   7   5  -1 29.7911  3.5185   1
  -7  -5   1 23.5865  5.0054   4
  -7  -5   1 34.2954  5.2620   7
   6   5  -1 363.524  28.991   3
   6   5  -1 354.424  17.597   1
  -6  -5   1 364.603  27.616   1
  -6  -5   1 362.987  32.358   7
  -6  -5   1 363.328  21.756   4
   5   5  -1 0.81677 1.80554   1
   5   5  -1 -1.1444  3.0142   3
   5   5  -1 0.01524 2.34966   1
   5   5  -1 0.41821 1.58166   8
  -5  -5   1 -0.8236  2.8388   4
  -5  -5   1 0.44171 2.34444   1
   4   5  -1 4.34147 1.88157   3
   4   5  -1 4.04013 1.87760   8
   4   5  -1 5.24043 1.85025   1
   4   5  -1 1.25397 1.83712   1
  -4  -5   1 7.61677 2.86566   4
  -4  -5   1 8.39717 2.13729   1
   3   5  -1 155.269   9.657   3
   3   5  -1 147.165   9.242   1
   3   5  -1 142.618   7.531   1
  -3  -5   1 138.178  12.996   4
  -3  -5   1 165.670  10.175   1
  -3  -5   1 145.599   8.087   2
   2   5  -1 191.859   7.992   1
   2   5  -1 169.609   8.823   1
  -2  -5   1 174.414  10.119   3
  -2  -5   1 184.213  10.389   1
  -2  -5   1 164.292  10.786   4
   1   5  -1 105.417   9.394   4
   1   5  -1 120.472   6.355   1
  -1  -5   1 107.270   7.847   5
  -1  -5   1 122.046   7.741   1
  -1  -5   1 115.861   8.151   3
  -1  -5   1 113.462   8.971   4
   0   5  -1 755.050  62.492   5
   0   5  -1 688.551  48.430   4
   0   5  -1 779.151  29.716   1
   0  -5   1 760.845  64.260   2
   0  -5   1 715.720  66.292   5
   0  -5   1 779.575  42.263   1
   0  -5   1 666.001  40.891   4
  -1   5  -1 131.386   8.325   5
  -1   5  -1 115.398   9.975   4
  -1   5  -1 111.090   8.821   1
   1  -5   1 130.611  11.123   5
   1  -5   1 117.170   6.959   2
   1  -5   1 135.107  10.702   1
   1  -5   1 111.159   7.277   1
   1  -5   1 134.832  14.643   4
  -2   5  -1 2436.18  183.45   2
  -2   5  -1 2303.48   94.04   1
   2  -5   1 2223.07  126.39   1
   2  -5   1 2089.13  108.74   2
   2  -5   1 2194.83  134.17   5
   2  -5   1 2305.77  105.86   1
   2  -5   1 2414.12  182.86   4
  -3   5  -1 3.03553 1.52376   1
  -3   5  -1 2.00419 1.52396   4
   3  -5   1 9.05240 3.44302   4
   3  -5   1 -1.0709  1.6996   3
   3  -5   1 -1.3140  1.4559   2
   3  -5   1 -0.0503  1.6107   1
   3  -5   1 2.21638 2.71968   5
   3  -5   1 0.70550 1.86638   1
  -4   5  -1 725.939  40.136   1
   4  -5   1 731.846  39.631   2
   4  -5   1 719.678  40.525   6
   4  -5   1 740.466  30.222   5
   4  -5   1 671.338  40.265   1
   4  -5   1 725.456  47.308   3
   4  -5   1 704.056  35.177   1
  -5   5  -1 6.64963 2.19052   1
   5  -5   1 4.36947 2.33388   2
   5  -5   1 7.61652 2.41755   1
   5  -5   1 6.99267 2.35063   1
   5  -5   1 0.32446 2.80857   3
   5  -5   1 2.12492 2.65772   5
   5  -5   1 3.89346 1.30234   6
   6  -5   1 81.8858  6.5248   3
   6  -5   1 71.7694  5.5104   1
   6  -5   1 96.2628  7.4561   2
   6  -5   1 77.1780  8.2891   5
  -7   5  -1 216.964  16.340   7
   7  -5   1 224.324  17.507   3
   7  -5   1 216.163  14.652   2
   7  -5   1 231.602  16.995   5
   7  -5   1 214.188  17.497   1
  -8   5  -1 -2.6568  4.4453   7
   8  -5   1 1.22549 4.73074   5
   8  -5   1 1.89771 2.14117   1
   8  -5   1 15.1520  4.9954   3
   8  -5   1 -2.0623  5.5045   2
  -9   5  -1 7.28949 5.27937   7
   9  -5   1 4.86127 6.12226   2
   9  -5   1 1.62748 5.00913   3
   9  -5   1 -1.8749  5.9353   5
 -10   5  -1 21.4971  6.9231   7
 -10   5  -1 15.3519  5.4950   4
  10  -5   1 15.3097  6.8135   2
  10  -5   1 24.5509  8.2251   3
  10  -5   1 29.3863  7.8855   5
 -11   5  -1 50.3071 10.1642   7
  11  -5   1 40.7635 10.1086   3
  11  -5   1 49.3513 10.6788   5
  11   4  -1 1.81899 8.77971   3
 -11  -4   1 8.27714 8.31013   7
 -11  -4   1 0.01663 7.88944   4
  10   4  -1 153.756  15.821   3
 -10  -4   1 200.864  20.496   4
 -10  -4   1 131.719  14.036   7
   9   4  -1 1.94894 3.15993   1
   9   4  -1 -2.8279  4.1948   3
  -9  -4   1 7.29783 6.08132   4
  -9  -4   1 1.05171 6.31643   7
   8   4  -1 10.3452  2.8047   1
   8   4  -1 10.3949  4.1971   3
  -8  -4   1 10.5814  5.2174   4
  -8  -4   1 16.3303  5.8934   7
   7   4  -1 11.4712  2.6188   1
   7   4  -1 15.6273  4.0335   3
  -7  -4   1 15.6794  5.4343   4
  -7  -4   1 22.1895  5.6475   7
   6   4  -1 74.3446  4.9203   1
   6   4  -1 81.5428  6.9045   1
   6   4  -1 85.3617  7.5650   3
  -6  -4   1 80.4515  6.2105   1
  -6  -4   1 87.9838  7.5944   4
  -6  -4   1 80.7957  7.7360   7
   5   4  -1 147.466   8.638   1
   5   4  -1 194.868  13.538   3
   5   4  -1 166.306   7.788   1
  -5  -4   1 175.763  12.848   7
  -5  -4   1 162.226  11.381   1
  -5  -4   1 147.091  11.196   4
   4   4  -1 25.8848  2.8736   1
   4   4  -1 24.4818  3.2616   3
   4   4  -1 29.3925  3.1805   8
   4   4  -1 32.0216  2.7367   1
  -4  -4   1 29.7511  3.4305   1
  -4  -4   1 29.4327  4.3447   4
   3   4  -1 545.651  20.374   1
   3   4  -1 529.549  24.827   3
   3   4  -1 535.067  27.745   1
   3   4  -1 585.038  52.024   8
  -3  -4   1 526.384  22.033   1
  -3  -4   1 530.366  44.133   4
  -3  -4   1 533.444  34.677   2
   2   4  -1 29.5135  2.5088   4
   2   4  -1 33.6478  3.7296   1
   2   4  -1 34.8192  3.6059   1
   2   4  -1 32.4543  3.5766   3
  -2  -4   1 39.6528  3.6040   1
  -2  -4   1 31.3006  3.2497   2
  -2  -4   1 36.8904  4.1002   4
  -2  -4   1 38.5999  3.9000   3
   1   4  -1 306.358  11.157   1
   1   4  -1 297.336  20.572   4
   1   4  -1 292.204  12.499   1
  -1  -4   1 294.559  20.837   1
  -1  -4   1 280.172  19.014   3
  -1  -4   1 282.509  15.168   1
  -1  -4   1 302.402  22.320   4
   0   4  -1 87.5412  5.0122   1
   0   4  -1 89.3616  4.7568   1
   0   4  -1 85.1814  6.2493   4
   0   4  -1 90.5173  7.0163   5
   0  -4   1 82.8194  7.5567   4
   0  -4   1 85.1370  6.5677   1
   0  -4   1 86.2944  5.7952   1
   0  -4   1 91.3920  8.7007   5
  -1   4  -1 8732.15  310.74   1
   1  -4   1 8747.43  453.44   1
   1  -4   1 9228.36  735.32   5
  -2   4  -1 26.2588  2.6245   2
  -2   4  -1 21.8108  2.3977   4
  -2   4  -1 21.0308  2.3155   1
   2  -4   1 23.8146  2.7339   2
   2  -4   1 17.9561  2.9930   5
   2  -4   1 24.3082  5.2199   4
   2  -4   1 17.1784  2.0171   3
   2  -4   1 24.0357  2.8077   1
   2  -4   1 22.9591  2.6698   1
  -3   4  -1 487.102  21.357   1
  -3   4  -1 509.079  46.162   4
   3  -4   1 479.374  16.406   1
   3  -4   1 416.038  18.176   5
   3  -4   1 441.641  27.919   1
   3  -4   1 535.767  32.235   3
   3  -4   1 519.068  26.521   2
  -4   4  -1 52.5257  4.3667   1
   4  -4   1 44.2201  4.3752   1
   4  -4   1 50.3043  4.3700   3
   4  -4   1 55.6879  5.2770   2
   4  -4   1 54.4743  3.4506   1
   4  -4   1 49.2333  4.5196   5
   4  -4   1 51.6997  3.5441   6
  -5   4  -1 1607.21  111.75   1
   5  -4   1 1546.58  117.26   1
   5  -4   1 1676.54   53.83   3
   5  -4   1 1653.20  100.72   2
   5  -4   1 1575.88   97.27   5
   5  -4   1 1622.07   50.37   1
  -6   4  -1 96.4664  7.6733   1
   6  -4   1 101.369   5.764   1
   6  -4   1 98.6366  7.2067   3
   6  -4   1 91.1091  8.4077   1
   6  -4   1 104.952   6.335   2
   6  -4   1 106.456  10.829   5
  -7   4  -1 413.009  18.041   7
   7  -4   1 383.212  19.112   2
   7  -4   1 369.799  27.667   1
   7  -4   1 397.408  22.366   5
   7  -4   1 354.597  23.368   3
  -8   4  -1 117.244  10.401   7
   8  -4   1 108.004   9.660   3
   8  -4   1 105.081   8.714   5
   8  -4   1 123.600   9.532   2
   8  -4   1 87.0477  7.5467   1
  -9   4  -1 42.1199  8.2685   7
  -9   4  -1 51.2370  6.3622   4
   9  -4   1 41.8950  7.8124   3
   9  -4   1 45.9383  7.9462   5
   9  -4   1 31.2737  7.2571   2
 -10   4  -1 9.16618 5.62093   4
 -10   4  -1 12.5388  6.2109   7
  10  -4   1 17.8278  6.7800   3
  10  -4   1 15.0360  6.8824   5
  10  -4   1 18.5114  7.2163   2
 -11   4  -1 6.40916 6.99381   7
  11  -4   1 2.88378 6.43517   3
  11  -4   1 5.49693 7.68062   5
  11   3  -1 40.0513  8.3859   3
 -11  -3   1 14.2484  8.7979   4
 -11  -3   1 26.3252  8.7308   7
  10   3  -1 39.8985  8.9104   3
 -10  -3   1 26.3602  9.0481   7
 -10  -3   1 38.5206  8.1993   4
   9   3  -1 34.6074  6.2544   3
  -9  -3   1 27.2841  6.6643   7
  -9  -3   1 47.3049  7.3328   4
   8   3  -1 283.698  17.466   1
   8   3  -1 313.816  18.316   3
  -8  -3   1 323.420  22.977   7
  -8  -3   1 330.923  26.307   4
   7   3  -1 6.82149 2.05883   1
   7   3  -1 6.97113 3.53810   3
  -7  -3   1 7.93182 3.66410   4
  -7  -3   1 5.55197 3.86713   7
  -7  -3   1 5.91512 2.14995   8
   6   3  -1 26.1064  4.2950   3
   6   3  -1 21.7110  2.8558   1
   6   3  -1 24.3157  2.2299   1
  -6  -3   1 22.8753  2.7774   1
  -6  -3   1 23.0893  2.7243   8
  -6  -3   1 21.3576  4.1715   4
   5   3  -1 9.87506 2.43283   1
   5   3  -1 6.92725 2.96249   3
   5   3  -1 5.10208 1.71660   1
  -5  -3   1 7.99038 2.05444   1
  -5  -3   1 11.3715  3.2024   7
  -5  -3   1 5.71247 3.42829   4
   4   3  -1 1355.31   59.32   1
   4   3  -1 1328.81   52.73   3
   4   3  -1 1252.24   42.59   1
  -4  -3   1 1376.85   60.67   1
  -4  -3   1 1281.52   77.36   4
  -4  -3   1 1397.05   70.97   7
   3   3  -1 4.80925 1.13434   8
   3   3  -1 8.13695 1.96182   1
   3   3  -1 9.52498 2.02604   1
   3   3  -1 2.22855 1.72096   7
   3   3  -1 9.79899 2.85724   3
  -3  -3   1 9.22148 2.41433   7
  -3  -3   1 3.89644 1.86253   3
  -3  -3   1 2.68269 1.55476   2
  -3  -3   1 5.30733 1.81846   4
   2   3  -1 944.922  81.777   7
   2   3  -1 867.688  41.375   3
   2   3  -1 839.006  39.181   4
   2   3  -1 861.122  40.531   1
   2   3  -1 799.297  32.217   1
  -2  -3   1 796.217  39.341   1
  -2  -3   1 832.919  63.546   2
  -2  -3   1 786.669  46.709   1
  -2  -3   1 790.034  40.738   3
  -2  -3   1 808.124  59.352   4
   1   3  -1 23.4557  2.4658   1
   1   3  -1 27.0881  2.8100   3
   1   3  -1 29.4726  2.8047   1
   1   3  -1 30.8064  2.8585   4
  -1  -3   1 24.4237  2.7084   3
  -1  -3   1 28.2548  2.9594   4
  -1  -3   1 26.1984  2.5365   1
  -1  -3   1 28.9515  2.4082   1
   0   3  -1 1075.08  159.73   1
   0  -3   1 1359.34  199.18   1
  -1   3  -1 140.055  11.979   4
  -1   3  -1 135.547   8.251   5
  -1   3  -1 122.490   6.542   1
  -1   3  -1 120.572   5.883   1
  -1   3  -1 140.416   8.517   2
   1  -3   1 129.364   7.784   1
   1  -3   1 118.106   8.391   5
   1  -3   1 129.887   9.182   4
   1  -3   1 132.186   8.664   2
   1  -3   1 114.096   4.544   1
  -2   3  -1 488.309  20.006   5
  -2   3  -1 456.527  12.805   1
  -2   3  -1 464.748  17.900   2
  -2   3  -1 479.413  28.433   4
  -2   3  -1 465.562  18.935   1
   2  -3   1 483.705  13.383   1
   2  -3   1 466.846  33.234   4
   2  -3   1 480.734  34.371   5
   2  -3   1 486.358  29.529   3
   2  -3   1 425.262  27.911   1
   2  -3   1 422.420  22.716   2
  -3   3  -1 14.5367  2.0429   4
  -3   3  -1 7.36211 2.11086   2
  -3   3  -1 13.4327  1.9214   1
   3  -3   1 13.9040  1.9703   1
   3  -3   1 7.58653 2.14285   5
   3  -3   1 11.1121  1.7005   1
   3  -3   1 11.3800  2.6845   3
   3  -3   1 15.5563  2.6002   2
   3  -3   1 15.6665  1.7761   6
  -4   3  -1 830.070  67.337   4
  -4   3  -1 842.459  43.159   1
   4  -3   1 842.917  52.988   6
   4  -3   1 865.256  44.855   2
   4  -3   1 854.470  39.049   3
   4  -3   1 791.000  50.044   1
   4  -3   1 829.757  33.089   1
   4  -3   1 821.920  38.762   5
  -5   3  -1 391.322  16.597   1
   5  -3   1 421.956  22.164   3
   5  -3   1 378.919  24.918   1
   5  -3   1 435.229  19.864   2
   5  -3   1 417.555  26.850   5
   5  -3   1 402.033  15.267   1
  -6   3  -1 468.270  19.768   1
  -6   3  -1 495.719  25.967   7
   6  -3   1 482.217  24.593   3
   6  -3   1 476.207  45.487   5
   6  -3   1 451.265  17.527   2
   6  -3   1 463.529  28.978   1
  -7   3  -1 0.21829 3.60566   7
   7  -3   1 1.55831 1.28804   1
   7  -3   1 2.16680 3.65001   2
   7  -3   1 1.83127 3.59902   3
   7  -3   1 2.79260 1.34283   1
   7  -3   1 7.63728 3.79215   5
  -8   3  -1 43.8022  7.3235   7
   8  -3   1 39.5173  5.4529   5
   8  -3   1 39.3288  6.8497   3
   8  -3   1 45.6293  6.4793   2
  -9   3  -1 14.4903  6.9671   7
  -9   3  -1 23.7049  4.4860   4
   9  -3   1 10.6385  4.7111   2
   9  -3   1 21.1842  5.2002   5
   9  -3   1 14.9408  6.5742   3
 -10   3  -1 39.4409  8.4169   7
 -10   3  -1 52.8769  8.3058   4
  10  -3   1 52.7328  9.0883   5
  10  -3   1 38.0498  8.3767   3
 -11   3  -1 16.4781  8.1665   7
 -11   3  -1 13.6013  7.8722   4
  11  -3   1 23.8937  8.6715   3
  11  -3   1 32.4445  8.8174   5
  11   2  -1 -0.0478  6.6320   3
 -11  -2   1 4.65628 7.21538   7
 -11  -2   1 10.4410  7.0381   4
  10   2  -1 6.17269 4.41697   3
 -10  -2   1 4.23657 7.51647   7
 -10  -2   1 -5.3691  5.4468   4
   9   2  -1 -3.9351  4.1050   3
  -9  -2   1 1.24030 4.30222   6
  -9  -2   1 0.93951 5.16035   7
  -9  -2   1 7.11548 5.58849   4
   8   2  -1 564.619  33.086   3
   8   2  -1 541.713  27.515   1
  -8  -2   1 588.655  44.411   7
  -8  -2   1 582.416  32.770   4
   7   2  -1 290.162  16.043   3
   7   2  -1 255.315  12.562   1
  -7  -2   1 250.342  14.431   7
  -7  -2   1 250.614  19.152   8
  -7  -2   1 297.733  17.621   4
   6   2  -1 128.169   9.579   1
   6   2  -1 109.317   6.030   1
   6   2  -1 119.431   8.107   3
  -6  -2   1 115.381   5.048   1
  -6  -2   1 116.903   8.538   4
  -6  -2   1 127.950   7.810   7
  -6  -2   1 117.832   7.340   8
   5   2  -1 1504.19   69.61   1
   5   2  -1 1704.88   99.67   1
   5   2  -1 1569.33   71.91   3
  -5  -2   1 1617.10   68.74   7
  -5  -2   1 1535.89   52.59   4
  -5  -2   1 1654.94   81.51   8
  -5  -2   1 1593.34   48.57   1
   4   2  -1 57.2495  3.2923   1
   4   2  -1 64.8694  3.6538   1
   4   2  -1 59.2898  4.0183   3
  -4  -2   1 60.0284  4.1324   8
  -4  -2   1 47.1104  3.7512   4
  -4  -2   1 50.2997  2.9107   1
  -4  -2   1 55.4614  4.1602   7
  -3  -2   1 1630.93  423.02   2
  -3  -2   1 2270.60  204.67   5
  -3  -2   1 1456.61  238.70   3
   2   2  -1 -0.6038  1.1765   3
   2   2  -1 -0.6149  3.0188   7
   2   2  -1 0.31452 1.04576   8
   2   2  -1 -0.1524  2.8785   1
   2   2  -1 -0.7411  1.2074   1
  -2  -2   1 0.18230 1.64628   3
  -2  -2   1 0.07431 4.36208   7
  -2  -2   1 1.09167 3.99650   4
  -2  -2   1 1.34957 1.47238   1
  -2  -2   1 0.01742 1.47815   2
  -2  -2   1 1.33904 1.17013   1
   1   2  -1 89.6723  4.9717   1
   1   2  -1 94.7814  5.4955   3
   1   2  -1 86.2031  5.5136   1
   1   2  -1 98.6549  5.5326   4
  -1  -2   1 100.031   6.635   4
  -1  -2   1 94.7038  5.0502   1
  -1  -2   1 82.2612  3.9453   1
  -1  -2   1 90.0015  6.8444   3
   0   2  -1 14.2000  1.8469   5
   0   2  -1 16.1582  1.7788   1
   0   2  -1 14.4597  1.8953   1
   0  -2   1 18.8192  1.9224   1
   0  -2   1 16.2848  2.0398   1
   0  -2   1 14.5340  2.1066   4
  -1   2  -1 1306.16   52.29   1
  -1   2  -1 888.195 111.268   4
  -1   2  -1 1289.83   80.28   2
  -1   2  -1 1179.15   60.59   1
  -1   2  -1 1266.08   98.26   5
   1  -2   1 1318.57  107.70   2
   1  -2   1 1237.83   70.40   1
   1  -2   1 1273.08   86.63   5
   1  -2   1 1298.75   89.18   4
   1  -2   1 1282.32   75.09   3
   1  -2   1 1273.61   64.20   1
  -2   2  -1 284.374  14.715   1
  -2   2  -1 297.994  22.381   2
  -2   2  -1 313.062  21.442   5
  -2   2  -1 331.746  20.417   4
  -2   2  -1 329.261  18.908   3
  -2   2  -1 299.157  13.259   1
   2  -2   1 282.824  16.218   1
   2  -2   1 296.278  14.394   3
   2  -2   1 300.361  17.976   2
   2  -2   1 303.309  13.296   1
   2  -2   1 311.347  15.866   6
   2  -2   1 311.616  24.314   5
  -3   2  -1 337.914  16.730   3
  -3   2  -1 388.450  23.608   4
  -3   2  -1 326.353  17.225   1
  -3   2  -1 321.842  11.337   1
  -3   2  -1 334.898  26.879   2
   3  -2   1 300.549  15.767   1
   3  -2   1 332.449  14.664   3
   3  -2   1 338.264  19.309   5
   3  -2   1 330.046  19.850   2
   3  -2   1 337.353  16.586   1
   3  -2   1 330.221  14.801   6
  -4   2  -1 196.657   9.461   1
  -4   2  -1 198.395  10.835   1
  -4   2  -1 199.116  11.162   6
  -4   2  -1 191.779  19.433   4
   4  -2   1 211.597  14.343   2
   4  -2   1 206.833  11.954   5
   4  -2   1 187.933  10.202   1
   4  -2   1 218.965  14.238   3
  -5   2  -1 66.6960  3.6484   6
  -5   2  -1 65.1758  5.4060   7
  -5   2  -1 66.0039  2.8181   1
  -5   2  -1 51.2093  5.0294   1
   5  -2   1 56.5364  5.8961   5
   5  -2   1 65.5255  3.5784   1
   5  -2   1 59.9235  5.5328   2
   5  -2   1 77.7278  5.8343   3
  -6   2  -1 34.1685  2.0413   1
  -6   2  -1 22.1308  4.5503   1
  -6   2  -1 33.3237  4.5476   7
  -6   2  -1 32.1239  3.1945   6
   6  -2   1 30.8407  2.7984   1
   6  -2   1 29.4746  4.3347   2
   6  -2   1 31.4755  3.6281   3
   6  -2   1 36.2176  4.8629   5
   6  -2   1 36.9933  2.3868   1
  -7   2  -1 128.198   9.920   7
  -7   2  -1 123.419   9.134   6
   7  -2   1 126.202  11.366   3
   7  -2   1 125.664  11.019   5
   7  -2   1 124.599   8.596   2
  -8   2  -1 776.862  40.713   7
  -8   2  -1 726.969  50.513   4
   8  -2   1 744.689  36.228   5
   8  -2   1 742.117  30.312   2
   8  -2   1 791.003  57.383   3
  -9   2  -1 91.9974 10.5727   7
  -9   2  -1 109.428  12.657   4
   9  -2   1 108.785  10.809   3
   9  -2   1 105.145  10.835   2
   9  -2   1 121.262  10.810   5
 -10   2  -1 -6.7187  6.1868   4
 -10   2  -1 12.6613  5.1850   7
  10  -2   1 -2.2479  5.2305   5
  10  -2   1 12.3082  5.8126   3
 -11   2  -1 7.18009 8.82351   7
 -11   2  -1 13.2783  4.8680   4
  11  -2   1 16.4971  7.3714   3
  11   1  -1 12.6005  5.7024   3
 -11  -1   1 10.6727  7.5201   4
 -11  -1   1 9.89332 7.55056   7
  10   1  -1 6.97768 5.88925   3
 -10  -1   1 14.9962  6.9196   7
 -10  -1   1 5.00587 5.72468   4
   9   1  -1 11.4811  4.7882   3
  -9  -1   1 13.4005  6.3174   7
  -9  -1   1 27.5646  6.8701   4
   8   1  -1 346.063  22.234   3
   8   1  -1 342.847  16.237   1
  -8  -1   1 380.804  23.291   6
  -8  -1   1 384.264  26.856   8
  -8  -1   1 394.617  25.726   4
  -8  -1   1 402.076  24.338   7
   7   1  -1 67.9302  6.3960   3
   7   1  -1 58.8377  4.0141   1
   7   1  -1 52.5558  3.8243   1
  -7  -1   1 49.8260  6.0644   4
  -7  -1   1 48.4542  4.8597   8
  -7  -1   1 48.3130  5.8457   7
   6   1  -1 2.98570 1.25955   1
   6   1  -1 6.70048 3.28675   3
  -6  -1   1 3.88657 2.07566   8
  -6  -1   1 5.10442 1.54827   1
  -6  -1   1 7.03235 2.89223   4
  -6  -1   1 9.24791 3.90112   7
   5   1  -1 107.636   6.209   1
   5   1  -1 112.165  11.877   3
   5   1  -1 105.744   8.089   2
  -5  -1   1 112.873   7.249   8
  -5  -1   1 111.400   6.783   4
  -5  -1   1 102.535   7.164   7
  -5  -1   1 110.552   5.717   1
   4   1  -1 2297.92   97.97   1
   4   1  -1 2001.16  108.29   2
   4   1  -1 1943.84  154.65   3
   4   1  -1 1905.45   76.46   1
  -4  -1   1 2023.90   99.02   7
  -4  -1   1 2150.16   77.99   8
  -4  -1   1 2084.83   80.93   1
   3   1  -1 77.6317  9.9705   1
   3   1  -1 69.3625  4.8323   2
   3   1  -1 77.5086  4.4348   7
   3   1  -1 74.3774  5.8410   3
   3   1  -1 71.1807  3.3147   1
  -3  -1   1 67.2527  6.9150   5
  -3  -1   1 70.7091  5.6375   3
  -3  -1   1 67.5701  3.9625   7
  -3  -1   1 69.6180  4.6168   1
  -3  -1   1 71.3396  4.3919   1
  -3  -1   1 65.1937  6.6656   2
  -3  -1   1 69.2738  3.4703   8
   2   1  -1 1503.73  136.10   3
   1   1  -1 0.13379 0.79407   8
   1   1  -1 1.20317 0.81726   1
   1   1  -1 -0.5551  0.8260   3
   1   1  -1 0.09186 1.06467   7
   1   1  -1 0.55773 0.88156   1
  -1  -1   1 -0.1263  0.8960   3
  -1  -1   1 -1.1336  0.5573   1
  -1  -1   1 -0.7516  0.9047   7
  -1  -1   1 0.28555 0.64520   1
  -1  -1   1 0.11811 0.84872   4
  -1   1  -1 24.5559  1.8587   2
  -1   1  -1 12.1465  2.5920   5
   1  -1   1 21.9694  1.5550   1
   1  -1   1 14.7803  1.8958   5
   1  -1   1 21.4831  1.2480   1
   1  -1   1 20.1041  1.4269   3
  -2   1  -1 1774.25  116.70   5
  -2   1  -1 1694.63   84.86   1
  -2   1  -1 1729.26   92.52   6
  -2   1  -1 1821.49  131.84   2
  -2   1  -1 1874.68  100.21   3
  -2   1  -1 1620.83   81.04   1
   2  -1   1 1671.41  126.08   2
   2  -1   1 1622.33   82.63   1
   2  -1   1 1824.07   97.65   3
   2  -1   1 1725.21  121.98   5
   2  -1   1 1803.27   78.31   6
  -3   1  -1 21.8068  3.1966   3
  -3   1  -1 22.5314  1.9632   6
  -3   1  -1 19.5576  1.1630   1
  -3   1  -1 23.7430  3.0790   2
  -3   1  -1 20.6477  1.4412   1
  -3   1  -1 15.2260  3.0892   5
   3  -1   1 19.7270  1.3655   1
   3  -1   1 20.0308  2.7067   5
   3  -1   1 23.1187  3.4068   3
   3  -1   1 24.8145  2.8397   2
  -4   1  -1 300.921  13.992   1
  -4   1  -1 310.150  15.826   7
  -4   1  -1 327.297  17.556   6
  -4   1  -1 363.962  15.455   1
   4  -1   1 329.568  20.323   2
   4  -1   1 343.021  15.058   1
   4  -1   1 332.336  18.226   1
   4  -1   1 349.263  24.291   3
   4  -1   1 323.588  21.153   5
  -5   1  -1 14.6307  0.9957   1
  -5   1  -1 19.4695  1.4097   1
  -5   1  -1 14.7930  2.3206   6
  -5   1  -1 21.1202  3.8917   7
   5  -1   1 27.4789  3.8356   5
   5  -1   1 18.8873  1.3271   1
   5  -1   1 24.6696  3.8907   3
  -6   1  -1 65.0571  5.0832   6
  -6   1  -1 65.6479  6.9552   7
   6  -1   1 74.9804  5.3247   3
   6  -1   1 70.5675  5.2803   2
   6  -1   1 62.6766  5.8741   5
  -7   1  -1 5.42690 2.10778   6
  -7   1  -1 1.04102 3.12996   4
  -7   1  -1 6.81827 3.45567   7
   7  -1   1 2.31308 3.19005   3
   7  -1   1 1.58852 3.11884   2
   7  -1   1 6.78167 2.88206   5
  -8   1  -1 301.419  25.773   6
  -8   1  -1 363.916  20.475   4
  -8   1  -1 333.736  23.481   7
   8  -1   1 334.065  21.738   5
   8  -1   1 366.975  17.276   2
   8  -1   1 323.883  19.914   3
  -9   1  -1 -0.2473  5.9796   7
  -9   1  -1 2.72259 4.46200   4
   9  -1   1 2.41172 4.55858   2
   9  -1   1 -2.9495  3.9975   3
   9  -1   1 3.33147 4.36283   5
 -10   1  -1 9.77249 4.77675   4
 -10   1  -1 8.64438 6.75449   7
  10  -1   1 18.0375  5.6721   3
 -11   1  -1 48.2362  8.6449   7
 -11   1  -1 36.5297 10.0119   4
  11  -1   1 42.0341 10.1177   3
  11   0  -1 24.4448  7.9808   3
 -11   0   1 22.9749  9.8057   4
 -11   0   1 18.9882  7.7151   7
  10   0  -1 6.47595 5.72011   3
 -10   0   1 18.4724  6.9099   4
 -10   0   1 19.0062  8.1489   7
   9   0  -1 -5.9218  4.3404   3
  -9   0   1 2.73043 5.12074   7
  -9   0   1 2.15883 3.87867   4
   8   0  -1 -0.2192  4.5140   3
   8   0  -1 0.40538 0.48570   1
  -8   0   1 -5.4722  3.8016   7
  -8   0   1 -0.4575  3.2091   4
  -8   0   1 0.61481 3.33961   8
  -8   0   1 1.36418 3.07725   6
   7   0  -1 46.3116  3.2676   1
   7   0  -1 53.9432  5.7109   3
   7   0  -1 58.4486  5.8754   1
  -7   0   1 66.1295  6.8443   4
  -7   0   1 53.4061  6.4685   7
  -7   0   1 51.9890  4.1579   6
  -7   0   1 56.3992  5.3152   8
   6   0  -1 72.7084  4.3702   1
   6   0  -1 75.0813  7.7031   3
   6   0  -1 80.8978  8.1621   5
   6   0  -1 86.4725  5.9309   1
   6   0  -1 82.7193  6.8844   2
  -6   0   1 70.2972  6.1295   7
  -6   0   1 76.7211  3.7003   1
   5   0  -1 179.637  10.884   5
   5   0  -1 199.730  11.901   2
   5   0  -1 182.292  12.002   3
   5   0  -1 182.787  11.232   1
  -5   0   1 198.502   9.208   7
  -5   0   1 199.110   6.377   1
  -5   0   1 166.032  10.407   1
   4   0  -1 442.627  24.430   2
   4   0  -1 457.880  29.245   3
   4   0  -1 454.834  23.887   1
   4   0  -1 455.790  27.643   5
  -4   0   1 471.489  18.454   1
  -4   0   1 464.228  24.208   7
  -4   0   1 437.399  24.846   1
   3   0  -1 2244.22  126.51   3
   3   0  -1 2111.42  117.37   2
   3   0  -1 2134.82   96.76   1
   3   0  -1 2164.28  125.80   5
   3   0  -1 2326.87  133.30   7
   3   0  -1 2151.64  113.55   1
  -3   0   1 2404.81  140.23   3
  -3   0   1 2329.67  242.11   5
  -3   0   1 2274.04  106.21   1
  -3   0   1 2371.89  154.96   2
  -3   0   1 2228.48  124.24   7
   2   0  -1 221.422  14.679   5
   2   0  -1 224.387  13.244   3
   2   0  -1 215.057   7.579   1
   2   0  -1 218.170  14.140   7
   2   0  -1 203.262  10.897   2
   2   0  -1 196.794   8.290   1
  -2   0   1 223.402  12.081   5
  -2   0   1 213.518  11.304   3
  -2   0   1 207.843   9.767   1
  -2   0   1 208.289  10.577   1
  -2   0   1 217.872  12.869   7
  -2   0   1 228.416  12.049   2
  -2   0  -1 10.3319  1.6693   3
  -2   0  -1 11.5271  1.6482   6
  -2   0  -1 9.02112 1.40480   5
  -2   0  -1 10.5234  1.5490   7
  -2   0  -1 8.62211 1.77014   2
   2   0   1 12.2994  1.8010   5
   2   0   1 10.2134  1.5776   2
   2   0   1 13.3763  1.9595   3
  -3   0  -1 2580.96  174.36   6
  -3   0  -1 2741.53  186.96   2
  -3   0  -1 2875.94  224.60   3
  -3   0  -1 2791.26  186.38   5
  -3   0  -1 2721.75  164.34   7
   3   0   1 2659.63  137.98   2
   3   0   1 2637.83  196.53   3
   3   0   1 2594.02  186.40   5
  -4   0  -1 56.3399  5.5120   7
  -4   0  -1 51.2853  3.9117   6
   4   0   1 44.4248  3.7165   5
   4   0   1 56.5905  5.3819   2
   4   0   1 51.2976  4.3758   3
  -5   0  -1 78.4529  7.9565   6
  -5   0  -1 92.9190  6.6704   7
  -5   0  -1 87.2751  5.1550   4
   5   0   1 82.8247  6.0708   5
   5   0   1 89.9405  7.0244   3
   5   0   1 98.0972  6.9454   2
  -6   0  -1 2.83525 3.44061   4
  -6   0  -1 2.97518 1.89603   6
  -6   0  -1 3.00093 2.52220   7
   6   0   1 0.65665 3.18341   2
   6   0   1 -1.0394  3.0895   3
   6   0   1 -0.1617  2.3552   5
  -7   0  -1 52.1939  5.2475   4
  -7   0  -1 47.7420  4.5097   6
  -7   0  -1 48.7537  6.0376   7
   7   0   1 58.5642  5.5598   2
   7   0   1 50.0164  5.0653   5
   7   0   1 55.6477  6.6051   3
  -8   0  -1 10.7772  3.7984   6
  -8   0  -1 10.2474  3.8673   7
  -8   0  -1 11.8278  3.6734   4
   8   0   1 9.27347 3.96924   2
   8   0   1 24.4966  4.8146   5
   8   0   1 18.3043  4.6893   3
  -9   0  -1 365.276  29.161   7
  -9   0  -1 363.066  28.342   4
   9   0   1 397.969  20.785   2
   9   0   1 380.896  24.948   3
 -10   0  -1 -3.6134  5.6471   7
 -10   0  -1 8.88637 4.83587   4
  10   0   1 19.8991  6.0648   3
 -11   0  -1 12.2369  8.2326   4
 -11   0  -1 21.9895  8.2354   7
  11   0   1 12.2125  6.2396   3
  11  -1  -1 194.872  19.300   3
 -11   1   1 205.142  25.349   4
 -11   1   1 272.667  28.053   7
  10  -1  -1 9.42526 6.41757   3
 -10   1   1 14.7014  7.0700   7
 -10   1   1 12.4127  7.8884   4
   9  -1  -1 142.238  12.138   3
  -9   1   1 137.083  11.275   7
  -9   1   1 135.455  11.162   4
  -9   1   1 145.583  10.113   8
   8  -1  -1 38.9254  6.3593   3
  -8   1   1 33.2369  5.7250   4
  -8   1   1 43.0810  6.9590   7
   7  -1  -1 0.00000 3.05891   5
   7  -1  -1 0.72430 1.06898   1
   7  -1  -1 2.24927 3.10655   2
   7  -1  -1 1.21829 1.35965   1
   7  -1  -1 6.22182 3.24459   3
  -7   1   1 -5.1733  3.1482   7
  -7   1   1 -1.2670  2.2758   6
   6  -1  -1 13.5074  3.4338   5
   6  -1  -1 17.5774  3.0435   2
   6  -1  -1 15.0832  3.5579   3
   6  -1  -1 12.2115  1.7346   1
   6  -1  -1 14.3615  1.9451   1
  -6   1   1 11.7723  2.0333   6
  -6   1   1 14.1678  1.7137   1
  -6   1   1 19.3421  4.0611   7
   5  -1  -1 4.35327 2.80579   3
   5  -1  -1 2.27705 1.10161   1
   5  -1  -1 6.11096 2.45034   5
   5  -1  -1 0.78269 2.40106   2
  -5   1   1 3.51792 1.61072   6
  -5   1   1 3.63287 1.24315   1
  -5   1   1 2.76998 2.31407   7
   4  -1  -1 447.915  18.265   3
   4  -1  -1 424.340  27.079   1
   4  -1  -1 408.817  25.410   2
   4  -1  -1 390.002  19.050   5
  -4   1   1 442.180  20.965   7
  -4   1   1 440.164  18.836   1
  -4   1   1 369.057  19.578   1
   3  -1  -1 45.6967  2.7688   1
   3  -1  -1 41.3771  3.9130   5
   3  -1  -1 43.5198  3.8856   2
   3  -1  -1 43.5982  4.4515   3
  -3   1   1 42.8186  3.1244   7
  -3   1   1 45.7442  3.4318   3
  -3   1   1 38.7063  2.7977   1
  -3   1   1 44.5924  3.4952   2
  -3   1   1 40.4080  4.0538   5
  -3   1   1 43.3217  2.6283   1
   2  -1  -1 1.47370 0.97670   1
   2  -1  -1 2.25026 1.81354   3
   2  -1  -1 3.83803 1.16575   1
   2  -1  -1 3.81294 1.70703   2
   2  -1  -1 4.43973 1.77628   5
  -2   1   1 2.25460 0.85109   1
  -2   1   1 4.36051 1.52490   3
  -2   1   1 2.48004 1.55008   2
  -2   1   1 4.10883 1.40233   4
  -2   1   1 2.46089 1.40473   7
  -2   1   1 2.99437 0.94185   1
  -2   1   1 0.61999 1.32632   5
  -2  -1  -1 4211.52  332.78   3
  -2  -1  -1 3828.26  198.78   4
  -2  -1  -1 4090.31  244.95   7
   2   1   1 4353.87  269.14   7
   2   1   1 4105.66  229.61   4
   2   1   1 4046.49  237.50   2
   2   1   1 3996.86  280.40   3
   2   1   1 3898.97  241.51   5
  -3  -1  -1 162.807   9.931   5
  -3  -1  -1 165.846   9.735   2
  -3  -1  -1 150.947   7.117   1
  -3  -1  -1 162.185  17.401   3
  -3  -1  -1 163.293  11.396   7
  -3  -1  -1 150.659   8.787   4
  -3  -1  -1 162.730   6.700   1
   3   1   1 161.014   8.735   3
   3   1   1 160.414   9.554   7
   3   1   1 173.107   9.882   5
   3   1   1 150.656   5.558   1
   3   1   1 167.838   9.965   2
  -4  -1  -1 1888.81   58.54   1
  -4  -1  -1 1782.30   52.84   7
  -4  -1  -1 1731.18   66.10   4
   4   1   1 1614.61   62.57   1
   4   1   1 1766.95   90.71   1
   4   1   1 1669.22   89.73   2
   4   1   1 1753.32  109.95   3
   4   1   1 1643.37   93.40   5
  -5  -1  -1 89.2172  5.6462   1
  -5  -1  -1 115.796   6.515   4
  -5  -1  -1 111.339   6.239   7
  -5  -1  -1 107.634   4.931   1
   5   1   1 104.034   6.448   2
   5   1   1 90.8838  3.2884   1
   5   1   1 90.5106  5.9229   3
   5   1   1 83.9736  6.5391   5
   5   1   1 107.962   5.918   1
  -6  -1  -1 70.1366  6.4953   6
  -6  -1  -1 83.9839  6.5573   4
  -6  -1  -1 77.0426  7.2084   7
   6   1   1 70.3099  6.0339   2
   6   1   1 69.1447  6.0446   5
   6   1   1 84.5126  6.1757   3
  -7  -1  -1 1.32497 3.78915   7
  -7  -1  -1 -1.1883  2.4785   6
  -7  -1  -1 0.62803 3.17632   4
  -7  -1  -1 -2.7401  2.3937   8
   7   1   1 -3.2668  2.9131   5
   7   1   1 0.32857 2.96087   2
   7   1   1 2.82237 3.72180   3
  -8  -1  -1 121.248  11.910   4
  -8  -1  -1 114.058  12.031   7
  -8  -1  -1 93.4738  7.5985   8
  -8  -1  -1 114.904  11.609   6
   8   1   1 103.135   8.278   2
   8   1   1 119.170   9.374   3
  -9  -1  -1 93.4231  8.8092   4
  -9  -1  -1 99.3967  9.4716   7
   9   1   1 117.390   7.642   3
 -10  -1  -1 -1.8856  5.1949   4
 -10  -1  -1 -0.4138  6.2616   7
  10   1   1 4.29077 5.37456   3
 -11  -1  -1 85.8053 13.9206   4
 -11  -1  -1 81.4998 11.4015   7
  11   1   1 71.5875  9.4037   3
  11  -2  -1 25.2033  8.5935   3
 -11   2   1 23.4901  8.4064   7
 -11   2   1 22.4822  8.4275   4
  10  -2  -1 84.7737 11.2771   3
 -10   2   1 90.1827 12.9387   4
 -10   2   1 78.3616  9.5044   7
   9  -2  -1 68.8328 10.6704   3
  -9   2   1 77.4460  8.1287   4
  -9   2   1 82.5753  8.6997   7
   8  -2  -1 275.514  18.751   1
   8  -2  -1 342.857  27.096   3
   8  -2  -1 352.644  28.679   5
  -8   2   1 386.973  25.355   7
   7  -2  -1 376.066  25.240   5
   7  -2  -1 422.950  21.753   2
   7  -2  -1 455.482  27.389   3
   7  -2  -1 397.162  25.015   1
   7  -2  -1 438.600  27.714   1
  -7   2   1 414.034  26.872   6
  -7   2   1 420.472  21.387   7
   6  -2  -1 97.0759  7.9499   1
   6  -2  -1 98.7762  7.7533   5
   6  -2  -1 82.0150  7.7322   2
   6  -2  -1 107.770   6.574   3
  -6   2   1 94.3102  5.9806   6
  -6   2   1 95.9649  8.1411   7
  -6   2   1 99.2816  4.2815   1
   5  -2  -1 319.573  17.168   1
   5  -2  -1 321.542  18.205   2
   5  -2  -1 323.219  14.470   5
   5  -2  -1 295.837  14.142   3
  -5   2   1 322.824  17.060   6
  -5   2   1 309.744  20.633   7
  -5   2   1 338.341  12.551   1
   4  -2  -1 2.47316 2.36504   3
   4  -2  -1 1.17165 1.30019   1
   4  -2  -1 0.30170 1.09857   1
   4  -2  -1 1.96017 2.20379   5
   4  -2  -1 -0.6415  2.4955   2
  -4   2   1 1.22539 1.50226   1
  -4   2   1 1.00227 0.93497   6
  -4   2   1 -1.1975  2.0141   7
  -4   2   1 1.87498 1.14938   1
   3  -2  -1 16.8066  1.7728   1
   3  -2  -1 20.4869  2.0697   1
   3  -2  -1 17.2027  3.0330   5
   3  -2  -1 23.4376  2.5777   2
   3  -2  -1 19.9032  2.8835   3
  -3   2   1 19.3001  2.0049   1
  -3   2   1 19.9420  1.8823   1
  -3   2   1 13.7940  2.6253   2
  -3   2   1 20.2065  3.0916   4
  -3   2   1 24.1678  1.4691   6
  -3   2   1 16.8263  2.5512   7
   2  -2  -1 360.611 144.699   4
   2  -2  -1 80.5169  6.5548   5
   2  -2  -1 79.9985  5.4477   1
   2  -2  -1 98.5558  6.4298   3
   2  -2  -1 81.7719  4.1993   1
   2  -2  -1 85.9684  4.6169   2
  -2   2   1 73.3429  6.0782   2
  -2   2   1 76.7777  4.9560   1
  -2   2   1 79.8926  4.2992   1
  -2   2   1 94.5621  7.0128   5
  -2   2   1 103.577  11.909   4
   1  -2  -1 1863.75  109.88   5
   1  -2  -1 1828.35  119.64   2
   1  -2  -1 1923.99  149.13   4
   1  -2  -1 1667.07   99.08   1
   1  -2  -1 1801.67   90.75   1
  -1   2   1 1689.61  105.93   2
  -1   2   1 1751.37   98.37   1
  -1   2   1 1509.86  153.04   4
  -1   2   1 1882.07  125.05   5
   0  -2  -1 41.8800  2.7553   1
   0  -2  -1 39.7574  4.7538   4
   0   2   1 40.4778  3.0690   5
   0   2   1 42.6658  2.8897   1
   0   2   1 35.4696  2.4289   2
  -1  -2  -1 2737.79  128.76   1
  -1  -2  -1 2937.04  209.45   3
  -1  -2  -1 2863.59  194.92   4
   1   2   1 2742.63  146.44   1
   1   2   1 2578.70  105.10   1
   1   2   1 3035.84  212.83   4
   1   2   1 2693.36  147.06   2
  -2  -2  -1 201.360  12.202   4
  -2  -2  -1 174.598  11.287   2
  -2  -2  -1 187.447  10.361   1
  -2  -2  -1 188.670  16.197   5
  -2  -2  -1 190.004  14.229   3
  -2  -2  -1 207.832  18.134   7
  -2  -2  -1 193.468   8.256   1
   2   2   1 203.799  10.620   1
   2   2   1 189.943   9.887   2
   2   2   1 184.898   9.838   1
   2   2   1 199.546  11.473   4
   2   2   1 212.109  13.519   8
   2   2   1 197.789  12.901   7
   2   2   1 206.805  10.804   3
  -3  -2  -1 270.840  13.319   1
  -3  -2  -1 286.889  10.450   1
  -3  -2  -1 297.964  15.780   8
  -3  -2  -1 275.202  17.279   4
  -3  -2  -1 304.213  19.602   2
  -3  -2  -1 286.279  21.206   5
  -3  -2  -1 280.360  30.681   3
  -3  -2  -1 284.475  14.602   7
   3   2   1 288.727  16.668   1
   3   2   1 259.207  10.254   1
   3   2   1 280.388  13.296   4
   3   2   1 266.847  14.622   2
   3   2   1 288.571  14.030   3
   3   2   1 296.551  12.703   7
   3   2   1 283.586  17.440   5
  -4  -2  -1 3.24677 1.14340   8
  -4  -2  -1 0.10612 2.77486   4
  -4  -2  -1 0.13713 1.90662   7
  -4  -2  -1 -0.0371  1.1073   1
  -4  -2  -1 -1.4274  1.6728   5
  -4  -2  -1 1.73614 1.18954   1
   4   2   1 0.84887 1.90953   5
   4   2   1 5.79583 2.75702   2
   4   2   1 1.04923 1.90118   3
   4   2   1 3.57447 1.17268   1
  -5  -2  -1 0.04098 1.21841   1
  -5  -2  -1 1.99989 2.25676   7
  -5  -2  -1 1.89229 1.43949   8
  -5  -2  -1 4.32947 2.57103   4
   5   2   1 2.97813 1.08503   1
   5   2   1 -1.9517  1.9455   5
   5   2   1 6.68794 2.28867   2
   5   2   1 3.43853 2.75711   3
  -6  -2  -1 3.76941 2.44737   4
  -6  -2  -1 0.71211 2.55387   7
  -6  -2  -1 2.73479 1.89090   8
   6   2   1 0.58710 1.26280   1
   6   2   1 -1.0333  3.0836   2
   6   2   1 2.18374 1.11329   1
   6   2   1 1.23525 3.10475   3
  -7  -2  -1 677.552  30.192   7
  -7  -2  -1 615.462  31.253   6
  -7  -2  -1 652.027  39.886   4
  -7  -2  -1 656.410  52.050   8
   7   2   1 693.629  35.082   1
   7   2   1 593.916  31.856   1
   7   2   1 703.765  30.756   3
   7   2   1 643.122  35.125   2
  -8  -2  -1 48.6794  6.8042   7
  -8  -2  -1 43.8154  6.4372   6
  -8  -2  -1 39.3011  5.4432   4
   8   2   1 48.0779  6.4405   3
   8   2   1 61.2107  5.8213   2
  -9  -2  -1 70.2761  8.9885   6
  -9  -2  -1 83.8241  8.1184   7
  -9  -2  -1 66.3976  7.6919   4
   9   2   1 102.341   9.379   3
 -10  -2  -1 8.79933 6.00945   4
 -10  -2  -1 5.22003 7.75186   7
  10   2   1 4.49227 5.17822   3
 -11  -2  -1 1.76683 7.54044   4
 -11  -2  -1 11.2936  7.1797   7
  11   2   1 9.00832 5.66009   3
  11  -3  -1 10.8661  6.8599   3
 -11   3   1 10.9932  7.9387   7
 -11   3   1 8.94539 6.89751   4
  10  -3  -1 177.742  17.405   3
 -10   3   1 181.531  12.992   7
 -10   3   1 139.906  14.943   4
   9  -3  -1 53.7997  8.4218   5
   9  -3  -1 45.8754  7.2207   3
  -9   3   1 32.3552  7.0929   7
   8  -3  -1 1071.57   64.04   5
   8  -3  -1 919.595  52.364   1
   8  -3  -1 998.543  58.236   3
   8  -3  -1 988.418  56.730   2
  -8   3   1 1031.12   55.46   7
   7  -3  -1 432.759  29.645   5
   7  -3  -1 443.821  21.855   2
   7  -3  -1 462.560  30.509   3
   7  -3  -1 431.564  35.561   1
  -7   3   1 472.225  26.195   7
   6  -3  -1 691.499  40.707   5
   6  -3  -1 654.518  33.112   1
   6  -3  -1 769.268  31.979   3
   6  -3  -1 704.216  50.097   1
   6  -3  -1 677.954  37.654   2
  -6   3   1 793.746  48.111   7
  -6   3   1 714.533  40.844   1
   5  -3  -1 180.172  11.304   1
   5  -3  -1 180.693  10.217   3
   5  -3  -1 177.512   9.909   5
   5  -3  -1 176.307   6.796   1
   5  -3  -1 177.028  11.363   2
  -5   3   1 173.741   9.134   1
  -5   3   1 177.742  10.677   7
   4  -3  -1 816.673  60.997   5
   4  -3  -1 805.220  29.464   1
   4  -3  -1 863.139  43.098   2
   4  -3  -1 798.499  43.245   1
   4  -3  -1 845.206  42.672   3
  -4   3   1 816.326  38.342   1
   3  -3  -1 136.912   5.693   1
   3  -3  -1 128.085   8.947   1
   3  -3  -1 140.551   8.427   2
   3  -3  -1 150.352   9.266   3
   3  -3  -1 138.562  10.051   5
  -3   3   1 133.837  17.471   2
  -3   3   1 127.308   8.341   1
  -3   3   1 131.328   6.590   1
  -3   3   1 139.494  10.912   4
   2  -3  -1 4053.51  244.12   1
   2  -3  -1 4442.35  247.42   4
   2  -3  -1 4291.80  182.09   1
   2  -3  -1 4291.49  260.25   5
   2  -3  -1 4521.98  188.48   2
  -2   3   1 4048.10  147.25   1
  -2   3   1 4491.19  277.67   5
  -2   3   1 4082.28  180.22   1
  -2   3   1 4432.50  189.48   2
   1  -3  -1 72.1367  3.8922   2
   1  -3  -1 72.2682  7.1885   4
   1  -3  -1 68.5421  4.7880   5
   1  -3  -1 73.1294  5.3470   1
   1  -3  -1 71.0948  4.3501   1
  -1   3   1 74.1726  4.4252   5
  -1   3   1 61.4047  5.3635   2
  -1   3   1 83.2196  7.1012   4
  -1   3   1 67.5452  3.6670   1
  -1   3   1 78.8212  5.4546   1
   0  -3  -1 333.197  20.597   5
   0  -3  -1 332.162  31.932   4
   0  -3  -1 319.405  16.634   2
   0  -3  -1 313.900  16.886   1
   0  -3  -1 320.980  20.208   1
   0   3   1 328.231  27.471   4
   0   3   1 325.461  15.976   1
   0   3   1 312.633  16.289   2
   0   3   1 325.828  19.647   5
   0   3   1 315.409  17.513   1
  -1  -3  -1 0.56318 1.12705   1
  -1  -3  -1 2.63151 1.20658   1
  -1  -3  -1 1.83885 1.46975   4
  -1  -3  -1 2.75450 0.71709   2
  -1  -3  -1 1.46031 1.43429   3
   1   3   1 6.17727 1.57664   4
   1   3   1 1.88595 1.20188   1
   1   3   1 2.68661 1.24391   1
  -2  -3  -1 545.092  33.130   3
  -2  -3  -1 515.101  30.417   2
  -2  -3  -1 476.822  23.591   1
  -2  -3  -1 492.551  31.891   5
  -2  -3  -1 485.512  26.903   1
  -2  -3  -1 517.580  34.383   4
   2   3   1 552.453  32.875   7
   2   3   1 465.887  17.025   1
   2   3   1 464.961  24.949   1
   2   3   1 462.558  27.133   4
   2   3   1 456.987  19.695   2
   2   3   1 464.520  30.334   3
  -3  -3  -1 439.129  19.869   2
  -3  -3  -1 435.822  26.458   7
  -3  -3  -1 393.959  17.242   1
  -3  -3  -1 408.985  20.861   3
  -3  -3  -1 368.088  27.887   5
  -3  -3  -1 418.822  28.424   1
  -3  -3  -1 385.478  29.043   4
   3   3   1 443.348  24.357   8
   3   3   1 350.347  19.740   3
   3   3   1 382.520  16.822   1
   3   3   1 419.207  21.465   7
   3   3   1 392.995  19.021   2
   3   3   1 426.106  19.380   1
  -4  -3  -1 101.765   7.515   7
  -4  -3  -1 97.4751  8.2775   5
  -4  -3  -1 102.980   6.281   4
  -4  -3  -1 99.8170  5.1090   1
   4   3   1 90.2149  5.5589   2
   4   3   1 101.009   5.985   3
   4   3   1 102.695   6.075   1
   4   3   1 91.4671  5.7249   1
  -5  -3  -1 44.2323  3.9104   7
  -5  -3  -1 36.4589  2.8057   1
  -5  -3  -1 49.4831  4.2098   4
  -5  -3  -1 46.4587  2.7163   8
   5   3   1 43.9937  2.8894   1
   5   3   1 43.7824  3.7503   1
   5   3   1 35.3110  3.9966   3
   5   3   1 47.8919  4.5582   2
  -6  -3  -1 103.691   7.551   7
  -6  -3  -1 108.613   6.427   8
  -6  -3  -1 112.031   7.454   4
   6   3   1 93.4915  4.7212   1
   6   3   1 77.5705  6.7333   2
   6   3   1 101.567   7.490   3
  -7  -3  -1 3.01506 1.83638   8
  -7  -3  -1 5.43075 4.54817   4
  -7  -3  -1 14.7326  5.0334   7
   7   3   1 8.10861 3.00168   2
   7   3   1 5.70536 1.57721   1
   7   3   1 2.50468 3.22168   3
   7   3   1 4.62932 1.45091   1
  -8  -3  -1 606.271  35.058   7
  -8  -3  -1 613.060  40.932   4
  -8  -3  -1 552.618  51.740   6
   8   3   1 573.377  27.781   1
   8   3   1 603.103  54.275   3
  -9  -3  -1 67.2584  7.2886   7
  -9  -3  -1 72.4483  8.1377   4
  -9  -3  -1 62.7423  8.5374   6
   9   3   1 68.0494 10.8867   3
 -10  -3  -1 59.7382  9.2868   4
 -10  -3  -1 55.9634 10.3765   7
  10   3   1 76.9751  8.0825   3
 -11  -3  -1 75.0941 11.3224   4
 -11  -3  -1 83.3664 11.5354   7
  11   3   1 71.9541 11.3901   3
  11  -4  -1 1.13518 6.70728   3
 -11   4   1 5.86717 8.12849   7
 -11   4   1 -2.2583  5.4889   4
  10  -4  -1 59.9508  8.8953   5
  10  -4  -1 46.1708  9.6249   3
 -10   4   1 46.0760  7.8646   4
 -10   4   1 57.6248  9.0183   7
   9  -4  -1 259.079  19.828   3
   9  -4  -1 251.434  21.533   5
  -9   4   1 283.563  23.723   7
   8  -4  -1 517.568  26.491   5
   8  -4  -1 498.541  28.477   3
   8  -4  -1 484.168  31.298   2
   8  -4  -1 448.160  43.702   1
  -8   4   1 507.926  30.957   7
   7  -4  -1 1567.79   60.67   5
   7  -4  -1 1556.21   67.23   2
   7  -4  -1 1631.49   79.26   3
   7  -4  -1 1608.80  102.86   1
  -7   4   1 1759.20  105.50   7
   6  -4  -1 46.2288  4.7869   5
   6  -4  -1 40.3800  5.1046   2
   6  -4  -1 42.2624  3.2357   1
   6  -4  -1 36.3375  5.2901   3
   6  -4  -1 47.6863  4.3875   1
  -6   4   1 38.9105  4.1077   1
  -6   4   1 41.8427  5.1785   7
   5  -4  -1 4.15114 1.93576   1
   5  -4  -1 3.25043 2.72681   5
   5  -4  -1 5.14156 2.10988   1
   5  -4  -1 0.40066 2.68653   3
   5  -4  -1 5.29247 2.85684   2
  -5   4   1 10.1541  3.0766   7
  -5   4   1 1.58960 1.94828   1
   4  -4  -1 30.9538  3.0108   1
   4  -4  -1 31.5487  2.6588   1
   4  -4  -1 42.0491  4.4129   2
   4  -4  -1 31.4719  3.1935   3
   4  -4  -1 25.8395  3.1186   5
  -4   4   1 32.7474  2.9281   1
   3  -4  -1 6.59393 2.23945   5
   3  -4  -1 2.71091 2.36596   2
   3  -4  -1 4.34847 0.83477   6
   3  -4  -1 3.46002 2.59553   3
   3  -4  -1 4.60007 1.68544   1
   3  -4  -1 6.44591 1.80287   1
   3  -4  -1 0.72946 2.04391   4
  -3   4   1 3.01132 1.76431   1
  -3   4   1 4.62013 4.05113   2
   2  -4  -1 5.34080 2.40533   5
   2  -4  -1 3.49333 1.48935   1
   2  -4  -1 5.93750 2.09460   4
   2  -4  -1 2.02168 1.62241   1
   2  -4  -1 6.06100 1.81475   2
  -2   4   1 4.53679 1.91312   5
  -2   4   1 4.56417 1.59262   1
  -2   4   1 1.65906 1.32352   4
  -2   4   1 4.84497 1.64717   2
   1  -4  -1 661.480  24.811   2
   1  -4  -1 752.168  45.210   5
   1  -4  -1 741.177  64.581   4
   1  -4  -1 643.011  39.328   1
   1  -4  -1 691.920  28.379   1
  -1   4   1 687.161  36.870   1
  -1   4   1 686.557  36.896   5
  -1   4   1 632.693  28.396   1
  -1   4   1 766.782  65.612   4
  -1   4   1 730.196  34.516   2
   0  -4  -1 74.8838  4.2580   2
   0  -4  -1 87.6771  4.9531   1
   0  -4  -1 73.6571  5.1402   5
   0  -4  -1 75.7434  4.4471   1
   0   4   1 78.8490  6.0426   4
   0   4   1 72.7235  4.8692   5
   0   4   1 79.9807  4.9478   1
   0   4   1 63.1721  4.7206   1
  -1  -4  -1 794.449  72.837   4
  -1  -4  -1 729.192  28.862   1
  -1  -4  -1 664.330  33.800   2
  -1  -4  -1 769.101  41.612   1
  -1  -4  -1 739.573  60.234   5
   1   4   1 744.772  31.157   1
   1   4   1 701.385  40.646   1
   1   4   1 679.357  39.312   4
  -2  -4  -1 33.7120  3.1238   4
  -2  -4  -1 32.9286  3.1862   3
  -2  -4  -1 29.6188  5.2931   1
  -2  -4  -1 38.3833  3.2639   2
  -2  -4  -1 36.5592  3.0769   1
   2   4   1 36.7295  4.2189   7
   2   4   1 33.6221  3.3892   4
   2   4   1 32.2479  3.1586   1
   2   4   1 40.6308  3.3622   1
  -3  -4  -1 3153.32  250.71   4
  -3  -4  -1 2821.64  164.25   2
  -3  -4  -1 2968.35  151.79   1
  -3  -4  -1 3014.16  224.86   5
   3   4   1 2830.33  101.37   1
   3   4   1 3088.37  117.24   1
   3   4   1 3053.02  192.81   3
  -4  -4  -1 6.47524 2.53607   7
  -4  -4  -1 6.99924 3.21920   4
  -4  -4  -1 4.24618 2.31730   5
  -4  -4  -1 4.31189 1.58517   1
   4   4   1 6.12323 2.26855   3
   4   4   1 7.37758 1.93059   1
   4   4   1 5.11757 1.93593   1
   4   4   1 5.88767 2.25531   2
  -5  -4  -1 350.503  17.016   1
  -5  -4  -1 367.955  20.370   7
  -5  -4  -1 341.830  16.878   4
   5   4   1 354.613  13.520   1
   5   4   1 329.563  19.075   3
   5   4   1 358.386  21.032   1
  -6  -4  -1 4.49592 3.51662   7
  -6  -4  -1 6.13543 3.32897   4
   6   4   1 3.28945 2.19089   1
   6   4   1 1.70094 1.71940   1
   6   4   1 4.86681 2.89709   3
  -7  -4  -1 -1.1516  3.4171   4
  -7  -4  -1 -0.4349  3.3900   7
   7   4   1 0.99686 3.11876   3
   7   4   1 3.07947 1.77707   1
  -8  -4  -1 78.4283 10.5469   4
  -8  -4  -1 76.4532  8.8265   7
   8   4   1 72.1291  5.4422   1
   8   4   1 74.4087  9.4221   3
  -9  -4  -1 12.3856  6.4705   4
  -9  -4  -1 5.41968 5.66495   7
  -9  -4  -1 10.7891  4.6644   6
   9   4   1 17.3033  5.4247   3
 -10  -4  -1 16.6942  7.2835   7
 -10  -4  -1 15.9818  6.1420   6
 -10  -4  -1 33.3777  9.1893   4
  10   4   1 17.8434  7.8602   3
 -11  -4  -1 14.5961  7.8195   4
 -11  -4  -1 14.6805  7.1414   7
  11   4   1 15.8261  7.5579   3
  11  -5  -1 8.24918 6.48164   3
 -11   5   1 -0.9084  7.6220   7
  10  -5  -1 97.6605 13.7082   5
  10  -5  -1 73.8087 12.6687   3
 -10   5   1 68.8823 11.9525   7
   9  -5  -1 82.8641 10.5083   3
   9  -5  -1 90.3388 10.1057   5
  -9   5   1 93.6946 10.0594   7
   8  -5  -1 365.442  23.345   2
   8  -5  -1 377.248  25.826   5
   8  -5  -1 360.913  20.778   3
   8  -5  -1 332.786  37.337   1
  -8   5   1 364.867  26.444   7
   7  -5  -1 37.8227  7.0451   3
   7  -5  -1 38.1513  5.7982   5
   7  -5  -1 36.9914  3.8631   1
   7  -5  -1 42.0816  6.4076   2
  -7   5   1 44.6838  6.5591   7
   6  -5  -1 404.854  28.770   2
   6  -5  -1 418.846  22.042   5
   6  -5  -1 434.588  25.415   3
   6  -5  -1 381.152  28.057   1
  -6   5   1 381.232  27.115   1
  -6   5   1 448.017  29.057   7
   5  -5  -1 113.860   6.998   2
   5  -5  -1 118.108   9.059   3
   5  -5  -1 111.391   8.769   1
   5  -5  -1 102.264   7.580   1
   5  -5  -1 119.119  14.372   5
  -5   5   1 114.318   8.487   1
   4  -5  -1 69.8515  6.4386   4
   4  -5  -1 69.5168  6.5287   3
   4  -5  -1 57.2891  5.0139   2
   4  -5  -1 65.9800  4.7297   1
   4  -5  -1 71.7217  5.3902   1
   4  -5  -1 57.1548  5.3561   5
  -4   5   1 69.8244  3.7193   1
   3  -5  -1 19.9046  3.2513   3
   3  -5  -1 19.0526  3.4099   5
   3  -5  -1 19.8225  2.7215   2
   3  -5  -1 14.5018  3.2174   4
   3  -5  -1 14.0006  2.3132   1
   3  -5  -1 18.4512  2.6292   1
  -3   5   1 20.5121  2.7404   1
   2  -5  -1 12.1467  2.1530   2
   2  -5  -1 15.9339  2.8308   1
   2  -5  -1 16.6860  2.9100   4
   2  -5  -1 18.3753  2.7614   1
   2  -5  -1 13.6012  3.0928   5
  -2   5   1 13.7372  2.4165   1
  -2   5   1 14.9657  2.1282   2
  -2   5   1 17.4803  2.7719   4
   1  -5  -1 7.12930 2.27519   5
   1  -5  -1 4.46489 4.77526   4
   1  -5  -1 6.11682 3.19358   1
   1  -5  -1 5.11700 2.51539   1
   1  -5  -1 3.76544 1.14577   2
  -1   5   1 4.56021 1.94475   1
  -1   5   1 11.3854  2.6849   4
  -1   5   1 7.02827 1.66629   5
  -1   5   1 4.01201 1.45454   2
   0  -5  -1 309.783  14.712   1
   0  -5  -1 307.194  18.783   5
   0  -5  -1 323.080  14.653   2
   0  -5  -1 277.891  13.003   1
   0  -5  -1 285.401  22.495   4
   0   5   1 350.920  17.148   5
   0   5   1 314.459  12.725   1
   0   5   1 307.653  28.002   4
  -1  -5  -1 147.326  15.483   4
  -1  -5  -1 119.026   5.745   2
  -1  -5  -1 126.193  10.631   5
   1   5   1 136.848   9.430   1
   1   5   1 143.839  12.350   4
   1   5   1 145.201   6.202   1
  -2  -5  -1 33.4531  2.5964   2
  -2  -5  -1 42.3698  5.0575   4
  -2  -5  -1 39.4867  3.5313   3
  -2  -5  -1 38.2691  3.7305   1
   2   5   1 42.8258  3.1795   1
   2   5   1 36.8684  3.2710   1
  -3  -5  -1 815.167  38.460   2
  -3  -5  -1 745.452  52.871   4
  -3  -5  -1 781.225  42.716   1
  -3  -5  -1 754.573  59.840   5
   3   5   1 769.844  41.075   1
   3   5   1 770.193  32.568   3
   3   5   1 757.000  33.748   1
   3   5   1 882.323 102.126   7
  -4  -5  -1 1102.82   50.27   4
  -4  -5  -1 1224.01   50.98   1
  -4  -5  -1 1087.96   81.72   5
   4   5   1 1206.59   66.36   3
   4   5   1 1164.04   63.41   1
   4   5   1 1174.59   54.03   1
   4   5   1 1274.31   82.78   8
  -5  -5  -1 121.394   7.154   1
  -5  -5  -1 135.382  11.046   4
   5   5   1 124.452   6.898   1
   5   5   1 127.948   6.612   1
   5   5   1 126.379   9.448   3
  -6  -5  -1 94.9487  8.6843   7
  -6  -5  -1 76.0077  9.6625   4
   6   5   1 86.3017  7.4684   3
   6   5   1 76.5335  5.1252   1
   6   5   1 78.1553  7.0859   1
  -7  -5  -1 -2.6029  3.7881   7
  -7  -5  -1 0.73800 4.42826   4
   7   5   1 -0.0619  3.4446   3
   7   5   1 2.82256 1.64651   1
  -8  -5  -1 9.77394 5.35282   7
  -8  -5  -1 10.6167  6.0164   4
   8   5   1 2.34035 5.18576   3
   8   5   1 5.86458 2.44045   1
  -9  -5  -1 42.5329  9.2351   4
  -9  -5  -1 41.3872  6.0658   7
   9   5   1 38.6143  6.8215   3
 -10  -5  -1 66.5632 10.7762   7
 -10  -5  -1 85.2488 11.4547   4
 -10  -5  -1 70.7594 10.7360   6
  10   5   1 77.0709 10.1594   3
 -11  -5  -1 14.9095  8.7387   7
 -11  -5  -1 13.8643  8.7460   4
  11   5   1 16.9312  9.1018   3
  10  -6  -1 30.8338  7.0729   3
  10  -6  -1 45.1104  8.7541   5
 -10   6   1 53.8208 10.9272   7
   9  -6  -1 7.48831 6.66495   3
   9  -6  -1 0.38379 5.67503   5
  -9   6   1 -3.6134  6.2570   7
   8  -6  -1 1.01049 4.02546   5
   8  -6  -1 4.29361 4.53807   2
   8  -6  -1 -0.8662  4.9770   3
   8  -6  -1 0.17461 6.03936   1
  -8   6   1 2.40577 5.05963   7
   7  -6  -1 46.9963  6.3016   3
   7  -6  -1 42.5038  5.5514   1
   7  -6  -1 48.3788  8.0586   2
   7  -6  -1 62.7979  7.0716   5
  -7   6   1 46.1330  6.6851   7
   6  -6  -1 4.06144 2.45468   1
   6  -6  -1 10.2733  3.7987   3
   6  -6  -1 3.68925 3.93301   5
   6  -6  -1 11.1724  4.4923   2
   5  -6  -1 62.0426  6.7898   1
   5  -6  -1 47.9846  5.3583   1
   5  -6  -1 49.3857  5.1139   2
   5  -6  -1 60.3362  7.3058   5
   5  -6  -1 59.5481  7.4850   3
  -5   6   1 53.8121  4.3192   1
   4  -6  -1 69.4166  6.3179   3
   4  -6  -1 66.6969  6.3758   1
   4  -6  -1 66.9633  5.4398   1
   4  -6  -1 86.1263  9.1646   5
   4  -6  -1 74.9202  6.4809   4
   4  -6  -1 80.5748  5.5585   2
  -4   6   1 67.3652  5.0099   1
   3  -6  -1 159.949   8.978   1
   3  -6  -1 164.972  14.177   4
   3  -6  -1 169.839   9.835   5
   3  -6  -1 151.363   7.862   2
   3  -6  -1 167.286  11.538   1
  -3   6   1 183.668  10.082   1
   2  -6  -1 18.5551  3.1920   5
   2  -6  -1 15.9746  6.2441   4
   2  -6  -1 12.6268  3.0881   2
   2  -6  -1 13.4805  3.3892   1
   2  -6  -1 7.89122 3.82851   1
  -2   6   1 6.53218 3.55964   4
  -2   6   1 8.08286 4.05906   1
   1  -6  -1 347.136  30.780   4
   1  -6  -1 335.386  20.386   5
   1  -6  -1 332.625  15.174   1
   1  -6  -1 314.711  17.395   2
  -1   6   1 324.798  28.710   5
  -1   6   1 312.583  15.613   2
  -1   6   1 321.790  12.390   1
  -1   6   1 311.364  21.212   4
   0  -6  -1 65.4207  3.0803   2
   0  -6  -1 70.3007  4.5604   5
   0  -6  -1 78.4835  5.6718   1
   0  -6  -1 66.5967  5.8360   4
   0   6   1 60.2103  4.3256   1
   0   6   1 65.3430  5.1699   5
   0   6   1 60.4768  6.5194   4
  -1  -6  -1 38.6154  1.6448   2
  -1  -6  -1 54.5047  4.7420   1
  -1  -6  -1 51.5809  3.7898   5
  -1  -6  -1 54.6561  5.0496   4
   1   6   1 47.3758  4.4198   1
  -2  -6  -1 22.3214  2.6400   3
  -2  -6  -1 37.4883  4.0770   1
  -2  -6  -1 35.6100  4.2566   4
  -2  -6  -1 28.5839  2.6188   5
  -2  -6  -1 32.3285  2.3476   2
   2   6   1 43.1349  4.2530   1
  -3  -6  -1 2391.34  248.82   4
  -3  -6  -1 2133.34  118.11   2
  -3  -6  -1 2059.77   96.81   1
   3   6   1 2212.83  119.86   1
   3   6   1 2259.57  103.05   1
  -4  -6  -1 62.5574  6.2763   5
  -4  -6  -1 79.3393 10.1774   4
  -4  -6  -1 88.6012  7.0459   1
   4   6   1 86.4114  7.8489   8
   4   6   1 77.1318  4.9565   1
   4   6   1 81.1480  5.8745   1
   4   6   1 80.2999  7.3675   3
  -5  -6  -1 72.1011  5.6813   1
  -5  -6  -1 70.1113  8.6165   4
   5   6   1 75.3263  5.9816   8
   5   6   1 80.3343  4.3775   1
   5   6   1 73.5996  8.2436   3
   5   6   1 66.5574  7.1323   1
  -6  -6  -1 42.3593  4.5394   1
  -6  -6  -1 50.2242  7.6422   4
   6   6   1 46.9045  5.7806   3
   6   6   1 44.3995  4.7367   1
  -7  -6  -1 165.328  19.623   4
   7   6   1 165.275  14.274   3
   7   6   1 138.096  11.154   1
  -8  -6  -1 302.876  27.387   4
   8   6   1 253.899  21.680   3
   8   6   1 255.025  20.646   1
  -9  -6  -1 12.7382  5.9174   4
  -9  -6  -1 4.70698 6.04433   7
   9   6   1 7.79077 3.12333   1
   9   6   1 16.1169  5.7336   3
 -10  -6  -1 158.934  20.023   4
 -10  -6  -1 140.100  15.757   7
 -10  -6  -1 158.019  19.958   6
  10   6   1 178.438  18.119   3
 -11  -6  -1 -0.9207  7.8591   4
  11   6   1 1.37073 6.36007   3
  10  -7  -1 6.89478 8.48432   5
  10  -7  -1 1.88771 5.28631   3
 -10   7   1 5.28139 8.65381   7
   9  -7  -1 46.7528 10.3898   5
   9  -7  -1 56.2856  9.5476   3
  -9   7   1 59.2736  8.6251   7
   8  -7  -1 29.4556  6.9816   5
   8  -7  -1 19.9941  4.1823   1
   8  -7  -1 36.5207  6.5796   3
  -8   7   1 25.5206  6.9184   7
   7  -7  -1 41.6956  5.4370   1
   7  -7  -1 47.1994  7.4704   2
   7  -7  -1 48.1270  6.7091   5
   7  -7  -1 43.7312  7.9703   3
  -7   7   1 43.6088  6.5074   7
   6  -7  -1 70.1851  7.5919   2
   6  -7  -1 78.5521  8.0864   5
   6  -7  -1 76.4178  8.3618   3
   6  -7  -1 69.6248  7.9197   1
   5  -7  -1 38.9158  4.4298   2
   5  -7  -1 34.9596  5.6225   3
   5  -7  -1 21.3265  3.6861   1
   5  -7  -1 28.2714  5.4086   5
  -5   7   1 28.1439  4.3059   1
   4  -7  -1 827.527  47.472   5
   4  -7  -1 980.188 167.586   4
   4  -7  -1 840.389  61.446   3
   4  -7  -1 778.699  44.624   2
   4  -7  -1 786.488  47.850   1
  -4   7   1 807.903  37.347   1
   3  -7  -1 1.50927 2.29178   2
   3  -7  -1 8.36598 2.66349   4
   3  -7  -1 6.59071 2.80323   1
   3  -7  -1 5.65620 2.52469   5
  -3   7   1 4.63099 2.06506   1
   2  -7  -1 431.247  20.602   2
   2  -7  -1 434.296  20.879   1
   2  -7  -1 371.991  16.413   5
   2  -7  -1 406.777  31.415   4
  -2   7   1 432.814  42.459   2
  -2   7   1 434.490  16.833   1
   1  -7  -1 4.96042 2.65093   5
   1  -7  -1 11.3711  2.9904   1
   1  -7  -1 4.15939 2.55574   4
   1  -7  -1 6.79704 1.46404   2
  -1   7   1 7.73644 2.54621   1
  -1   7   1 4.46075 4.94169   5
   0  -7  -1 296.017  18.238   1
   0  -7  -1 283.497  17.504   4
   0  -7  -1 258.822  12.916   5
   0   7   1 296.010  12.350   1
   0   7   1 255.094  21.712   5
  -1  -7  -1 3.68574 2.63781   4
  -1  -7  -1 7.14691 3.04739   1
  -1  -7  -1 6.28208 1.83979   5
   1   7   1 7.56922 3.11051   1
  -2  -7  -1 908.624  81.722   4
  -2  -7  -1 854.881  42.812   1
  -2  -7  -1 855.551  72.127   5
  -2  -7  -1 690.484  43.863   2
   2   7   1 809.425  29.238   1
  -3  -7  -1 25.2311  3.6315   1
  -3  -7  -1 12.9276  2.4476   2
  -3  -7  -1 17.8487  3.6811   4
   3   7   1 22.1820  3.3298   1
  -4  -7  -1 6.62368 3.23303   1
  -4  -7  -1 10.4508  3.2177   4
  -4  -7  -1 6.03740 1.62852   5
   4   7   1 11.0588  2.6144   1
  -5  -7  -1 12.3738  4.5566   4
   5   7   1 10.3773  2.3008   8
   5   7   1 13.1611  2.8393   1
   5   7   1 10.1936  2.7911   3
  -6  -7  -1 53.6418  5.8905   1
  -6  -7  -1 61.3892  7.8979   4
   6   7   1 69.6012  6.8926   3
   6   7   1 70.2275  6.1443   1
  -7  -7  -1 65.8891  9.5485   4
   7   7   1 64.8516  8.1865   3
   7   7   1 81.2873  6.7860   1
  -8  -7  -1 16.4555  5.8606   4
   8   7   1 23.5417  6.1516   3
   8   7   1 18.9903  4.3231   1
  -9  -7  -1 82.4615 12.2751   4
   9   7   1 61.7265  9.5390   3
   9   7   1 61.0459  5.7755   1
 -10  -7  -1 2.56376 7.07376   4
  10   7   1 6.84571 7.77323   3
  10  -8  -1 4.68082 8.47787   3
  10  -8  -1 19.1007  9.7920   5
 -10   8   1 38.3445  9.9403   7
   9  -8  -1 85.6691 12.5776   3
   9  -8  -1 83.6047  9.9546   5
  -9   8   1 57.2341 11.8327   7
   8  -8  -1 19.8152  5.7646   5
   8  -8  -1 28.5322  7.4188   3
   8  -8  -1 14.4918  3.9884   1
  -8   8   1 14.2720  6.0955   7
   7  -8  -1 118.990  11.586   3
   7  -8  -1 115.342  12.301   2
   7  -8  -1 138.181  11.666   1
   7  -8  -1 123.908  11.849   5
   6  -8  -1 6.05541 3.55684   1
   6  -8  -1 9.83922 4.34920   2
   6  -8  -1 8.52201 5.59236   5
   6  -8  -1 3.06775 3.40968   3
   5  -8  -1 14.4192  3.6415   3
   5  -8  -1 2.54391 3.62017   5
   5  -8  -1 6.75286 2.96340   1
   5  -8  -1 7.48282 3.75511   2
  -5   8   1 7.56760 3.23050   1
   4  -8  -1 243.386  22.586   3
   4  -8  -1 218.136  17.329   1
   4  -8  -1 221.364  17.106   5
   4  -8  -1 226.717  21.525   4
   4  -8  -1 227.936  14.212   2
  -4   8   1 226.857  16.305   1
   3  -8  -1 94.9486  8.2131   2
   3  -8  -1 98.8155  8.7389   4
   3  -8  -1 91.9248  8.8310   1
   3  -8  -1 91.4546  8.1562   5
  -3   8   1 106.615   6.048   1
   2  -8  -1 41.2665  4.7426   4
   2  -8  -1 42.6201  4.4898   5
   2  -8  -1 34.4244  4.1666   1
   2  -8  -1 36.8056  4.0020   2
  -2   8   1 31.2753  4.4187   2
  -2   8   1 40.3984  4.6018   1
   1  -8  -1 117.006   7.820   2
   1  -8  -1 129.266   7.063   1
   1  -8  -1 125.354   8.779   4
   1  -8  -1 138.363  10.262   5
  -1   8   1 128.017  11.014   1
   0  -8  -1 26.6273  4.4920   4
   0  -8  -1 28.0609  3.3452   5
   0  -8  -1 27.3466  5.1017   1
   0   8   1 25.4798  4.4512   5
   0   8   1 34.6594  5.9458   1
  -1  -8  -1 159.040  15.985   3
  -1  -8  -1 170.363  12.465   5
  -1  -8  -1 208.023  18.735   4
  -1  -8  -1 174.680  10.815   1
   1   8   1 160.722  10.812   1
  -2  -8  -1 6.97847 3.44064   1
  -2  -8  -1 1.96891 3.15329   4
  -2  -8  -1 1.79975 1.99001   5
  -2  -8  -1 0.80613 0.88470   2
   2   8   1 3.40277 3.00116   1
  -3  -8  -1 25.8425  3.0006   5
  -3  -8  -1 35.4041  4.3137   4
  -3  -8  -1 41.8787  4.7824   1
   3   8   1 34.6562  3.9140   1
  -4  -8  -1 53.7345  5.2217   1
  -4  -8  -1 55.1559  7.0528   4
   4   8   1 63.9419  5.9682   1
  -5  -8  -1 26.4655  4.0553   1
  -5  -8  -1 27.9473  5.8021   4
   5   8   1 24.4504  3.9925   1
  -6  -8  -1 11.2434  5.3413   4
   6   8   1 10.6456  3.5019   1
   6   8   1 12.4992  3.8173   3
  -7  -8  -1 311.049  32.821   4
   7   8   1 316.661  30.439   3
   7   8   1 301.176  16.203   1
  -8  -8  -1 11.3907  6.2650   4
   8   8   1 5.87048 5.53702   3
   8   8   1 6.92106 3.58034   1
  -9  -8  -1 40.3683  9.9041   4
   9   8   1 29.7064  5.5926   1
   9   8   1 32.3685  6.6129   3
 -10  -8  -1 -5.5885  8.5130   4
  10   8   1 11.2630  8.5471   3
   9  -9  -1 2.34409 7.53481   3
   9  -9  -1 -1.1444  6.4138   5
  -9   9   1 6.79767 6.94866   7
   8  -9  -1 293.658  33.193   1
   8  -9  -1 324.509  32.745   3
   8  -9  -1 327.292  28.212   5
  -8   9   1 311.737  30.009   7
   7  -9  -1 49.3444  7.3292   1
   7  -9  -1 47.1209  6.1502   3
   7  -9  -1 30.5812  7.8654   5
   6  -9  -1 29.4904  6.3932   3
   6  -9  -1 38.1087  7.3709   5
   6  -9  -1 47.5877  6.5562   2
   6  -9  -1 37.9076  5.2822   1
   5  -9  -1 18.0041  4.6450   1
   5  -9  -1 25.8626  4.8217   2
   5  -9  -1 22.8097  5.0118   5
   5  -9  -1 23.9048  6.3810   4
   5  -9  -1 34.0624  5.5255   3
  -5   9   1 27.1701  4.2142   1
   4  -9  -1 706.721  48.404   3
   4  -9  -1 696.092  40.828   1
   4  -9  -1 729.606  45.957   2
   4  -9  -1 697.197  47.671   5
   4  -9  -1 669.797  51.308   4
  -4   9   1 746.247  48.131   1
   3  -9  -1 30.9362  5.1435   5
   3  -9  -1 31.7357  6.0533   4
   3  -9  -1 30.4399  3.8457   1
   3  -9  -1 36.1314  4.2750   2
  -3   9   1 35.4510  5.5349   1
   2  -9  -1 583.948  37.241   2
   2  -9  -1 561.607  31.442   5
   2  -9  -1 574.361  38.178   1
   2  -9  -1 590.207  59.762   4
  -2   9   1 603.134  29.487   1
   1  -9  -1 10.0019  1.8257   2
   1  -9  -1 8.51745 3.04639   4
   1  -9  -1 7.82272 3.07023   1
   1  -9  -1 7.99091 2.44662   5
  -1   9   1 12.1562  2.6604   1
   0  -9  -1 11.8658  2.3528   5
   0  -9  -1 11.2364  3.4431   4
   0  -9  -1 19.5877  4.0457   1
   0   9   1 21.9049  3.6632   1
  -1  -9  -1 23.4878  4.2176   1
  -1  -9  -1 17.9288  4.0538   4
  -1  -9  -1 13.7814  2.5137   5
   1   9   1 9.14612 3.74093   1
  -2  -9  -1 135.565  11.267   4
  -2  -9  -1 122.120   8.574   1
  -2  -9  -1 103.290   8.593   5
   2   9   1 112.968   8.421   1
  -3  -9  -1 0.89383 3.47039   4
  -3  -9  -1 2.94035 4.01977   1
  -3  -9  -1 -0.8650  1.5016   5
   3   9   1 4.11957 3.32791   1
  -4  -9  -1 684.169  70.414   5
  -4  -9  -1 826.368  72.212   4
  -4  -9  -1 849.660  64.374   1
   4   9   1 880.262  45.059   1
  -5  -9  -1 365.618  53.359   4
  -5  -9  -1 372.279  26.482   1
   5   9   1 376.801  25.186   1
  -6  -9  -1 227.519  27.117   4
   6   9   1 236.507  16.998   1
  -7  -9  -1 26.4376  6.2727   4
   7   9   1 26.3518  4.8166   1
  -8  -9  -1 38.1013  8.3992   4
   8   9   1 45.6072  6.3574   1
  -9  -9  -1 12.7058  8.8023   4
   9   9   1 2.61591 4.56894   1
 -10  -9  -1 18.1020  8.7237   4
   9 -10  -1 50.4943 10.2460   3
   9 -10  -1 75.9629 12.4397   5
  -9  10   1 69.2622 11.1229   7
   8 -10  -1 193.928  19.629   5
   8 -10  -1 160.008  22.714   3
   8 -10  -1 137.102  16.044   1
  -8  10   1 176.914  25.026   7
   7 -10  -1 72.7171  7.4104   1
   7 -10  -1 73.1121 10.6981   3
   7 -10  -1 76.5283 10.3187   5
   6 -10  -1 17.5711  5.2396   2
   6 -10  -1 15.0217  5.4584   3
   6 -10  -1 25.8971  5.7369   1
   6 -10  -1 25.2745  7.7238   5
   5 -10  -1 261.459  23.935   4
   5 -10  -1 274.783  20.094   2
   5 -10  -1 260.644  20.935   1
   5 -10  -1 277.786  28.978   3
   5 -10  -1 317.572  32.418   5
   4 -10  -1 68.2018  6.7754   3
   4 -10  -1 63.6597  8.4934   4
   4 -10  -1 61.0211  8.4610   2
   4 -10  -1 72.5138  8.6649   1
   4 -10  -1 100.905  11.563   5
  -4  10   1 71.2635  8.9158   1
   3 -10  -1 171.038  11.015   5
   3 -10  -1 144.352  12.755   2
   3 -10  -1 154.146  17.689   4
   3 -10  -1 171.468  13.467   1
  -3  10   1 139.887  12.916   1
   2 -10  -1 8.06119 3.95248   1
   2 -10  -1 3.65585 2.92256   4
   2 -10  -1 4.91444 2.80788   5
   2 -10  -1 5.56092 2.05594   2
  -2  10   1 8.87773 3.78073   1
   1 -10  -1 6.61059 2.89634   4
   1 -10  -1 5.77904 2.91405   5
   1 -10  -1 2.56179 3.10048   1
  -1  10   1 10.4167  2.6658   1
   0 -10  -1 11.4318  3.0166   1
   0 -10  -1 8.29789 3.40993   4
   0 -10  -1 6.68931 2.42576   5
   0  10   1 4.62123 2.55851   1
  -1 -10  -1 25.5542  3.0191   5
  -1 -10  -1 36.3010  5.2105   1
  -1 -10  -1 26.0333  5.0476   4
   1  10   1 21.7967  4.1603   1
  -2 -10  -1 6.80002 4.04842   1
  -2 -10  -1 -3.2859  4.8822   4
  -2 -10  -1 4.48971 1.77237   5
   2  10   1 2.91268 4.06223   1
  -3 -10  -1 180.681  12.232   1
  -3 -10  -1 171.733  19.868   4
   3  10   1 182.292  11.779   1
  -4 -10  -1 101.163  11.832   4
  -4 -10  -1 108.429   9.959   1
   4  10   1 117.591   7.580   1
  -5 -10  -1 370.529  29.707   1
  -5 -10  -1 378.344  47.477   4
   5  10   1 383.043  28.117   1
  -6 -10  -1 16.2369  5.6778   4
   6  10   1 9.64487 4.25066   1
  -7 -10  -1 21.1385  6.8889   4
   7  10   1 13.2371  4.7076   1
  -8 -10  -1 0.22341 5.43823   4
   8  10   1 0.22394 4.34767   1
  -9 -10  -1 8.25729 8.44014   4
   9  10   1 -8.3950  4.3567   1
   8 -11  -1 113.719  14.420   1
   8 -11  -1 146.608  17.326   5
  -8  11   1 127.067  16.216   7
   7 -11  -1 5.24205 6.98346   3
   7 -11  -1 5.68107 4.66391   1
   7 -11  -1 -8.8606  5.7859   5
   6 -11  -1 76.9867  8.6975   5
   6 -11  -1 70.5513  9.0486   1
   6 -11  -1 64.4947 10.5810   3
   5 -11  -1 32.6341  6.1096   3
   5 -11  -1 29.2639  4.8167   1
   5 -11  -1 41.4527  6.7179   5
   5 -11  -1 28.1062  5.9895   4
   4 -11  -1 23.4910  4.7728   3
   4 -11  -1 22.1741  5.2429   4
   4 -11  -1 26.8384  5.9867   5
   4 -11  -1 20.7880  4.9558   1
  -4  11   1 20.9626  5.5723   1
   3 -11  -1 -0.6406  3.9992   1
   3 -11  -1 5.36416 3.90178   4
   3 -11  -1 0.98161 2.87224   5
  -3  11   1 6.63869 4.22475   1
   2 -11  -1 35.9075  5.4904   4
   2 -11  -1 36.5711  5.1214   5
   2 -11  -1 33.5164  5.2082   1
  -2  11   1 46.1591  6.3373   1
   1 -11  -1 1.77467 3.45372   1
   1 -11  -1 -0.8463  2.8368   4
   1 -11  -1 1.71274 2.74354   5
  -1  11   1 1.08643 3.00266   1
   0 -11  -1 139.275  18.149   4
   0 -11  -1 148.732  13.577   1
   0 -11  -1 141.253  16.296   5
   0  11   1 160.860  12.335   1
  -1 -11  -1 3.21542 4.03292   4
  -1 -11  -1 2.41449 2.14719   5
  -1 -11  -1 -0.1252  4.3212   1
   1  11   1 9.81866 4.16416   1
  -2 -11  -1 12.3112  4.9670   4
  -2 -11  -1 7.40462 4.45959   1
   2  11   1 4.82145 4.37280   1
  -3 -11  -1 2.02834 5.14798   1
  -3 -11  -1 -0.4298  3.8248   4
   3  11   1 6.40027 4.63948   1
  -4 -11  -1 682.740  58.157   4
  -4 -11  -1 743.917  57.105   1
   4  11   1 670.108  44.549   1
  -5 -11  -1 68.8736  9.3374   4
  -5 -11  -1 68.5741  7.1727   1
   5  11   1 71.4619  7.9777   1
  -6 -11  -1 55.8338  8.6577   4
   6  11   1 50.4986  6.8509   1
  -7 -11  -1 41.6992  9.4912   4
   7  11   1 46.7056  5.9702   1
  -8 -11  -1 0.00000 7.56913   4
   8  11   1 3.67628 5.01220   1
  -9 -11  -1 -0.5184  7.7780   4
   9  11   1 2.98041 5.03297   1
   8 -12  -1 1.67475 6.71661   1
   8 -12  -1 3.47791 7.83970   5
   7 -12  -1 83.9155 10.9691   1
   7 -12  -1 82.9005 12.0193   5
   6 -12  -1 10.2213  6.3820   5
   6 -12  -1 13.4518  4.6211   1
   5 -12  -1 124.714  14.925   5
   5 -12  -1 136.826  13.588   1
   4 -12  -1 20.2603  7.5006   1
   4 -12  -1 8.80990 4.64883   4
   4 -12  -1 5.85707 4.48209   5
  -4  12   1 6.71373 4.90873   1
   3 -12  -1 207.356  22.293   4
   3 -12  -1 224.804  20.866   1
   3 -12  -1 207.368  15.204   5
  -3  12   1 205.287  22.640   1
   2 -12  -1 -0.1355  3.3415   5
   2 -12  -1 -3.5827  3.3769   4
   2 -12  -1 -0.7093  3.3328   1
  -2  12   1 2.99736 3.34292   1
   1 -12  -1 15.3906  5.4531   4
   1 -12  -1 20.4941  5.0600   1
   1 -12  -1 15.3205  4.1760   5
  -1  12   1 7.09718 3.38532   1
   0 -12  -1 8.14477 3.31897   5
   0 -12  -1 38.0190  7.2938   4
   0 -12  -1 12.0627  4.1742   1
   0  12   1 21.7903  5.1632   1
  -1 -12  -1 15.0587  5.6617   4
  -1 -12  -1 3.70898 4.30483   1
   1  12   1 3.70401 3.44795   1
  -2 -12  -1 3.09785 4.36841   4
  -2 -12  -1 -6.2123  3.7917   1
   2  12   1 2.24527 2.93992   1
  -3 -12  -1 144.408  12.170   1
  -3 -12  -1 164.852  17.407   4
   3  12   1 160.761  13.709   1
  -4 -12  -1 30.1795  6.4473   1
  -4 -12  -1 22.7109  7.7469   4
   4  12   1 30.7644  5.2201   1
  -5 -12  -1 54.4833  9.4113   4
  -5 -12  -1 49.5207 10.1630   1
   5  12   1 53.7850  7.3376   1
  -6 -12  -1 30.4730  7.2208   4
   6  12   1 13.9773  4.5378   1
  -7 -12  -1 24.1414  7.0177   4
   7  12   1 23.0884  5.6741   1
  -8 -12  -1 23.5217  8.9411   4
   8  12   1 9.48275 7.45126   1
   7 -13  -1 9.46524 7.27041   1
   7 -13  -1 9.27804 7.40387   5
   6 -13  -1 2.19848 8.08675   5
   6 -13  -1 5.65624 5.60564   1
   5 -13  -1 11.2618  6.5842   5
   5 -13  -1 5.70348 3.69282   1
   4 -13  -1 255.508  28.657   5
   4 -13  -1 324.947  31.169   1
   3 -13  -1 4.43074 5.17650   4
   3 -13  -1 7.53913 5.40582   1
   3 -13  -1 0.07022 5.72221   5
  -3  13   1 1.31489 2.96716   1
   2 -13  -1 37.7182  6.0157   1
   2 -13  -1 8.85421 4.78450   5
   2 -13  -1 22.2357  5.8119   4
  -2  13   1 22.8568  5.8554   1
   1 -13  -1 31.1126  6.4947   1
   1 -13  -1 17.2505  4.6886   4
  -1  13   1 12.5680  4.0846   1
   0 -13  -1 14.2929  6.2834   4
   0 -13  -1 20.4966  5.7421   1
   0  13   1 11.1069  3.9905   1
  -1 -13  -1 5.90131 4.52301   4
  -1 -13  -1 9.12351 5.23289   1
   1  13   1 0.58862 4.10347   1
  -2 -13  -1 35.6877  6.9046   4
  -2 -13  -1 57.7277  8.1976   1
   2  13   1 42.2534  5.8628   1
  -3 -13  -1 3.20539 5.04368   4
  -3 -13  -1 7.82749 4.73503   1
   3  13   1 9.31717 4.70011   1
  -4 -13  -1 71.0429 11.0090   4
  -4 -13  -1 65.6102 10.4742   1
   4  13   1 65.1173  9.7900   1
  -5 -13  -1 -2.7386  6.6732   4
   5  13   1 6.11115 3.93127   1
  -6 -13  -1 22.5681  9.5409   4
   6  13   1 26.0030  5.1775   1
  -7 -13  -1 -3.2983  6.6749   4
   7  13   1 7.40844 5.98410   1
   6 -14  -1 17.2060  7.5490   1
   6 -14  -1 3.25731 6.84883   5
   5 -14  -1 3.94290 6.08245   5
   5 -14  -1 1.50226 4.89182   1
   4 -14  -1 5.29506 5.56928   1
   4 -14  -1 2.57431 6.07444   5
   3 -14  -1 17.7777  4.5083   1
  -3  14   1 2.96684 6.01568   1
   2 -14  -1 3.80588 4.06112   1
  -2  14   1 3.81829 5.33768   1
   1 -14  -1 42.4539  6.5307   4
   1 -14  -1 56.0819 10.0431   1
  -1  14   1 45.5406  8.8375   1
   0 -14  -1 6.46561 6.89214   1
   0 -14  -1 7.02170 5.24990   4
   0  14   1 1.12765 6.10978   1
  -1 -14  -1 91.8108 11.6061   4
  -1 -14  -1 81.5110 10.8009   1
   1  14   1 66.4994 10.4139   1
  -2 -14  -1 6.05998 5.23196   1
  -2 -14  -1 0.29304 5.63257   4
   2  14   1 3.65181 3.72926   1
  -3 -14  -1 79.3818 12.5647   1
  -3 -14  -1 95.7840 12.7047   4
   3  14   1 73.4183 12.1726   1
  -4 -14  -1 -8.2885  6.0369   4
  -4 -14  -1 -0.4378  6.4536   1
   4  14   1 -1.0012  4.6410   1
  -5 -14  -1 27.1763  7.8362   4
   5  14   1 24.9802  6.2615   1
  -6 -14  -1 10.4882  7.5825   4
   6  14   1 -1.1420  5.8676   1
  -7 -14  -1 27.4788 11.6792   4
   5 -15  -1 1.43098 7.65786   1
   4 -15  -1 12.6344  6.8990   1
   3 -15  -1 9.52031 5.59582   1
  -3  15   1 10.7524  7.6738   1
   2 -15  -1 43.5969  8.1882   1
  -2  15   1 44.7742  9.9014   1
   1 -15  -1 0.54032 3.97140   1
  -1  15   1 8.51135 5.57582   1
   0 -15  -1 5.94680 6.30455   1
   0 -15  -1 7.88432 5.22793   4
   0  15   1 5.55471 5.58961   1
  -1 -15  -1 4.69109 6.07019   1
  -1 -15  -1 -6.0639  5.4990   4
   1  15   1 13.8581  6.2570   1
  -2 -15  -1 72.9604 10.9759   1
  -2 -15  -1 46.1717  9.2703   4
   2  15   1 63.9310 10.4614   1
  -3 -15  -1 18.4971  7.6801   4
  -3 -15  -1 16.5245  9.4076   1
   3  15   1 12.1783  5.9697   1
  -4 -15  -1 84.8331 12.8554   4
  -4 -15  -1 113.489  15.963   1
   4  15   1 78.0705 10.7375   1
  -5 -15  -1 8.98611 8.24921   4
   5  15   1 8.92584 7.35591   1
  -6 -15  -1 69.1750 10.4887   4
   3 -16  -1 25.6618  7.8904   1
   2 -16  -1 -8.7799  4.7500   1
  -2  16   1 8.79951 7.59579   1
   1 -16  -1 10.7837  5.7869   1
  -1  16   1 23.1863  8.3995   1
   0 -16  -1 0.38080 8.44542   1
   0  16   1 -3.0875  6.4927   1
  -1 -16  -1 108.595  13.668   1
   1  16   1 89.8727 14.3154   1
  -2 -16  -1 0.96372 7.03218   4
  -2 -16  -1 5.39782 7.65631   1
   2  16   1 1.94921 7.06739   1
  -3 -16  -1 80.4803 17.2350   1
  -3 -16  -1 124.740  13.379   4
   3  16   1 124.897  17.251   1
  -4 -16  -1 -10.353   7.984   4
   4  16   1 8.61560 7.16293   1
   1 -17  -1 21.6514  8.5073   1
   0 -17  -1  2.4160 10.3631   1
   0  17   1 -10.250   8.443   1
   3  16  -2 -14.852   7.086   1
  -3 -16   2 10.0026  9.1078   1
   2  16  -2 -1.5450  8.8691   1
  -2 -16   2 11.9210  7.7846   1
   1  16  -2 12.0198  9.5521   1
  -1 -16   2  4.7370 10.2202   1
   0  16  -2 7.11697 7.64858   1
   0 -16   2 6.86997 7.37624   1
  -1  16  -2 5.65394 8.69949   1
   1 -16   2 -1.2743  8.1599   1
  -2  16  -2 46.5150 11.5836   1
   2 -16   2 67.2074 11.7881   1
   5  15  -2 16.9401  8.8956   1
  -5 -15   2 21.5023  8.3331   4
   4  15  -2 5.16249 7.09503   1
  -4 -15   2 -2.9089  6.6232   1
  -4 -15   2 3.72193 6.50267   4
   3  15  -2 17.5689  7.5023   1
  -3 -15   2 11.6461  8.0277   4
  -3 -15   2 9.54027 6.85604   1
   2  15  -2 4.59297 7.22385   1
  -2 -15   2 14.2956  9.0812   1
   1  15  -2 13.3571  7.5211   1
  -1 -15   2 -1.9681  7.9879   1
   0  15  -2 10.4369  6.0249   1
   0 -15   2 4.39408 6.46263   1
  -1  15  -2 115.554  15.833   1
   1 -15   2 112.868  15.943   1
  -2  15  -2 -0.8202  5.7782   1
   2 -15   2 -9.8844  5.7678   1
   3 -15   2 -0.5822  5.5783   1
   4 -15   2 11.1305  6.8575   1
   6  14  -2 78.9152 12.4039   1
  -6 -14   2 59.2205 12.1271   4
   5  14  -2 3.61564 6.37000   1
  -5 -14   2 6.31663 7.49830   4
   4  14  -2 5.86311 5.33225   1
  -4 -14   2 6.67337 5.60062   4
  -4 -14   2 -4.6006  6.6096   1
   3  14  -2 4.53727 6.12066   1
  -3 -14   2 -1.8540  5.0826   1
  -3 -14   2 -4.4757  7.7692   4
   2  14  -2 -2.6850  6.3613   1
  -2 -14   2 3.54954 6.63901   1
  -2 -14   2 -15.365   7.037   4
   1  14  -2 -4.9843  6.2402   1
  -1 -14   2 9.94495 7.02264   1
  -1 -14   2 -4.8810  4.9085   4
   0  14  -2 242.900  20.523   1
   0 -14   2 238.833  23.597   1
  -1  14  -2 0.05976 5.25874   1
   1 -14   2 -3.9155  5.5657   1
  -2  14  -2 217.354  22.593   1
   2 -14   2 199.500  19.250   1
  -3  14  -2 -7.8055  6.5753   1
   3 -14   2 10.8169  7.3260   1
   3 -14   2 -6.5920  4.9334   5
   4 -14   2 14.1144  5.9715   5
   4 -14   2 18.7438  7.2906   1
   5 -14   2 20.4446  8.3805   5
   5 -14   2 27.9845  9.0237   1
   6 -14   2 155.643  18.352   1
   6 -14   2 136.499  19.312   5
   7  13  -2 -0.8866  6.2662   1
  -7 -13   2 15.5006  7.1027   4
   6  13  -2 102.780  16.440   1
  -6 -13   2 57.8354 11.8000   4
   5  13  -2 82.4095 10.8199   1
  -5 -13   2 51.7928 11.2318   4
   4  13  -2 9.29373 6.00837   1
  -4 -13   2 4.87936 6.42249   4
  -4 -13   2 12.4240  5.8402   1
   3  13  -2 9.40888 4.70536   1
  -3 -13   2 6.37991 5.12111   1
  -3 -13   2 7.96175 5.21070   4
   2  13  -2 0.99334 4.86755   1
  -2 -13   2 2.90550 5.09845   4
  -2 -13   2 -3.5275  6.1263   1
   1  13  -2 27.6786  6.8702   1
  -1 -13   2 33.8291  7.3357   1
  -1 -13   2 36.0117  5.7126   4
   0  13  -2 1.88112 4.36875   1
   0 -13   2 6.35976 4.98433   1
   0 -13   2 -0.6289  4.4351   4
  -1  13  -2 59.4787  8.5275   1
   1 -13   2 72.8576  9.2216   1
   1 -13   2 48.7518  7.7881   4
  -2  13  -2 -0.2473  5.0294   1
   2 -13   2 -0.2208  4.6663   5
   2 -13   2 2.44694 4.90933   1
  -3  13  -2 10.1381  5.1308   1
   3 -13   2 9.79014 4.81953   5
   3 -13   2 9.34829 6.75887   1
   4 -13   2 0.34608 4.74038   1
   4 -13   2 -4.5467  6.1396   5
   5 -13   2 137.721  17.940   1
   5 -13   2 128.196  14.595   5
   6 -13   2 31.5262  8.1406   1
   6 -13   2 42.5387 10.6363   5
   7 -13   2 38.3183 11.9240   5
   7 -13   2 48.8995  9.2671   1
   8  12  -2 20.4933  7.4723   1
  -8 -12   2 24.8775  8.2564   4
   7  12  -2 12.1119  7.7183   1
  -7 -12   2 -10.811   7.373   4
   6  12  -2 222.081  17.406   1
  -6 -12   2 190.546  25.531   4
   5  12  -2 10.6336  5.7229   1
  -5 -12   2 5.93762 4.88926   1
  -5 -12   2 9.83607 7.78794   4
   4  12  -2 0.48354 4.58280   1
  -4 -12   2 4.40420 5.07342   4
  -4 -12   2 3.77915 6.42128   1
   3  12  -2 14.8206  5.4881   1
  -3 -12   2 3.12782 4.55766   4
  -3 -12   2 17.7185  6.3959   1
   2  12  -2 156.748  13.102   1
  -2 -12   2 153.828  15.930   4
  -2 -12   2 157.625  14.176   1
   1  12  -2 2.49457 4.29230   1
  -1 -12   2 -0.8229  4.7096   1
  -1 -12   2 3.75989 3.93815   4
   0  12  -2 159.662  15.677   1
   0 -12   2 169.786  15.091   1
   0 -12   2 148.252  17.813   4
   0 -12   2 147.699  13.634   5
  -1  12  -2 9.28206 4.74261   1
   1 -12   2 11.1885  5.2316   1
   1 -12   2 3.42373 4.63734   5
   1 -12   2 15.0276  4.7604   4
  -2  12  -2 201.285  17.011   1
   2 -12   2 166.555  14.735   5
   2 -12   2 161.802  25.558   4
   2 -12   2 205.575  17.596   1
  -3  12  -2 3.94418 4.94137   1
   3 -12   2 -6.5573  4.3457   1
   3 -12   2 -0.7212  4.4061   5
  -4  12  -2 23.3804  6.2499   1
   4 -12   2 37.8002  7.6548   1
   4 -12   2 35.8002  7.0518   5
   5 -12   2 11.3903  4.6905   1
   5 -12   2 -0.7309  6.4509   5
   6 -12   2 -4.6124  5.8142   5
   6 -12   2 6.88544 5.02160   1
   7 -12   2 4.39390 5.22711   1
   7 -12   2 3.03271 6.46240   5
   8 -12   2  9.2853 11.0791   5
   8  11  -2 4.60409 4.61769   1
  -8 -11   2 4.32845 7.82608   4
   7  11  -2 147.652  14.629   1
  -7 -11   2 149.781  20.781   4
   6  11  -2 6.46622 5.82480   1
  -6 -11   2 16.4242  6.3837   4
   5  11  -2 4.70456 5.02246   1
  -5 -11   2 -0.2798  5.0076   4
  -5 -11   2 -5.0935  4.4504   1
   4  11  -2 55.7807  7.1903   1
  -4 -11   2 63.3129  8.2500   1
  -4 -11   2 46.3306  7.2544   4
   3  11  -2 57.9642  6.4857   1
  -3 -11   2 66.6656  8.6886   4
  -3 -11   2 73.3507  7.4220   1
   2  11  -2 6.49030 3.81959   1
  -2 -11   2 6.46341 4.46476   4
  -2 -11   2 4.48530 4.24014   1
  -2 -11   2 -1.2518  2.4683   5
   1  11  -2 554.085  37.666   1
  -1 -11   2 530.936  57.004   5
  -1 -11   2 567.697  67.218   4
  -1 -11   2 503.067  32.469   1
   0  11  -2 6.73243 3.97633   1
   0 -11   2 -2.1214  2.8836   4
   0 -11   2 3.11830 3.22849   1
   0 -11   2 0.49952 3.19079   5
  -1  11  -2 171.126  13.547   1
   1 -11   2 156.278  11.989   5
   1 -11   2 178.528  15.587   4
   1 -11   2 160.671  12.589   1
  -2  11  -2 3.33343 3.75582   1
   2 -11   2 5.73567 3.11834   5
   2 -11   2 10.9300  4.3989   1
   2 -11   2 3.22006 3.55315   4
  -3  11  -2 176.149  21.649   1
   3 -11   2 174.220  16.901   4
   3 -11   2 178.986  20.051   1
   3 -11   2 212.787  20.958   5
  -4  11  -2 5.29923 4.49996   1
   4 -11   2 4.59373 4.14896   1
   4 -11   2 7.95654 5.54723   5
   5 -11   2 2.65888 4.10535   1
   5 -11   2 2.62115 4.84788   5
   6 -11   2 -0.3295  5.8329   5
   6 -11   2 7.87277 4.43156   1
   7 -11   2 93.4641 15.0786   5
   7 -11   2 95.0382 12.0853   1
   8 -11   2 33.1810  9.6060   5
   8 -11   2 15.4085  5.9975   1
   9  10  -2 9.92386 6.67847   1
  -9 -10   2 43.1800 11.7424   4
   8  10  -2 21.4256  6.4748   1
  -8 -10   2 9.28546 8.10485   4
   7  10  -2 70.1999  7.8874   1
  -7 -10   2 68.2493 10.0998   4
   6  10  -2 1.38425 4.05752   1
  -6 -10   2 -0.7875  6.8567   4
   5  10  -2 24.1712  5.9467   1
  -5 -10   2 20.2821  6.3601   4
  -5 -10   2 22.8756  5.6495   1
   4  10  -2 59.8576  6.5019   1
  -4 -10   2 54.9627  6.1380   1
   3  10  -2 1.87049 3.46127   1
  -3 -10   2 6.31993 3.67145   4
  -3 -10   2 -1.8933  2.3768   5
  -3 -10   2 1.27410 4.05759   1
   2  10  -2 -0.1222  3.2901   1
  -2 -10   2 4.01734 4.18149   4
  -2 -10   2 1.08973 1.96532   5
  -2 -10   2 1.34898 4.16618   1
   1  10  -2 27.9953  5.3123   1
  -1 -10   2 20.6573  3.8511   5
  -1 -10   2 41.2718  5.8137   4
  -1 -10   2 26.9822  5.2163   1
   0  10  -2 2.69394 3.46188   1
   0 -10   2 0.63618 3.15066   4
   0 -10   2 -0.3356  2.2123   5
  -1  10  -2 7.90092 4.35254   1
   1 -10   2 7.12414 3.39088   4
   1 -10   2 5.74085 3.15011   1
   1 -10   2 7.37498 3.78865   5
   1 -10   2 3.85333 1.99478   2
  -2  10  -2 74.1792  8.1247   1
   2 -10   2 75.4665  6.6040   2
   2 -10   2 59.4137  6.0604   5
   2 -10   2 79.7231  8.7058   4
   2 -10   2 103.411  10.033   1
   2 -10   2 79.5807  8.1669   3
  -3  10  -2 57.6771  6.6919   1
   3 -10   2 53.1356  6.3434   4
   3 -10   2 53.2894  5.7006   2
   3 -10   2 55.6633  6.6153   1
   3 -10   2 45.4862  6.5099   5
   3 -10   2 55.6396  6.4948   3
  -4  10  -2 37.0098  7.0240   1
   4 -10   2 41.7789  5.6925   2
   4 -10   2 38.5626  6.4612   3
   4 -10   2 41.0722  6.8865   5
   4 -10   2 43.3519  6.2570   1
   4 -10   2 36.8324  5.6372   4
   5 -10   2 14.9526  3.7245   2
   5 -10   2 20.9233  5.1411   1
   5 -10   2 24.9913  6.3312   5
   5 -10   2 22.8423  4.2911   3
   6 -10   2 4.87787 3.64190   3
   6 -10   2 5.92897 4.64294   5
   6 -10   2 0.69235 3.84267   2
   6 -10   2 0.19689 4.74779   1
   7 -10   2 30.0930  6.6641   2
   7 -10   2 25.1037  6.9850   1
   7 -10   2 31.6959  6.8239   5
   8 -10   2 108.244  15.142   1
   8 -10   2 119.719  15.361   5
   8 -10   2 128.979  14.804   2
  -9  10  -2 62.9086 12.5228   7
   9 -10   2 45.6001 11.2357   2
   9 -10   2 44.3794 10.3994   5
   9   9  -2 31.3364  8.2000   3
   9   9  -2 46.3827  6.3443   1
  -9  -9   2 41.5197  9.7502   4
   8   9  -2 1.05999 3.78798   1
   8   9  -2 0.84014 5.99059   3
  -8  -9   2 1.61241 5.59139   4
   7   9  -2 288.644  30.669   3
   7   9  -2 311.230  24.626   1
  -7  -9   2 298.753  25.556   4
   6   9  -2 52.0971  6.7318   1
  -6  -9   2 38.9452  9.2493   4
   5   9  -2 57.4159  7.0127   1
  -5  -9   2 57.4867  6.6234   1
  -5  -9   2 49.2054  9.0345   4
   4   9  -2 15.6235  3.7583   1
  -4  -9   2 6.23884 4.60168   1
  -4  -9   2 14.6928  4.5374   4
   3   9  -2 153.907  10.534   1
  -3  -9   2 191.884  22.647   4
  -3  -9   2 179.081  13.896   1
  -3  -9   2 153.410  15.995   5
   2   9  -2 78.5886  6.3150   1
  -2  -9   2 78.3980  6.7521   4
  -2  -9   2 66.5480  7.4096   5
  -2  -9   2 76.6816  6.5520   1
   1   9  -2 794.233  35.571   1
  -1  -9   2 780.701  55.087   4
  -1  -9   2 794.284  47.523   1
  -1  -9   2 638.945  48.383   3
  -1  -9   2 692.103  62.111   5
  -1  -9   2 723.192  59.555   2
   0   9  -2 22.1497  3.7073   1
   0  -9   2 27.0478  5.2730   1
   0  -9   2 18.9243  2.4773   3
   0  -9   2 21.6731  2.7224   2
   0  -9   2 22.0630  3.6768   5
   0  -9   2 18.5792  3.6608   4
  -1   9  -2 487.925  23.092   1
   1  -9   2 399.991  27.322   2
   1  -9   2 484.533  56.741   4
   1  -9   2 419.158  24.538   1
   1  -9   2 473.309  33.663   5
  -2   9  -2 3.96927 3.39854   1
   2  -9   2 2.78588 2.72435   4
   2  -9   2 0.72022 1.96652   3
   2  -9   2 2.56673 2.23442   2
   2  -9   2 -0.3980  2.6145   5
   2  -9   2 2.18590 2.75552   1
  -3   9  -2 54.1000  6.8471   1
   3  -9   2 42.1463  4.4813   2
   3  -9   2 48.9800  6.6413   4
   3  -9   2 59.6991  5.7164   1
   3  -9   2 60.6877  8.8433   5
   3  -9   2 58.0561  5.3727   3
  -4   9  -2 50.3441  6.7321   1
   4  -9   2 217.024 137.374   4
   4  -9   2 62.3967  5.9666   1
   4  -9   2 54.9038  6.0419   3
   4  -9   2 58.9746  6.7039   2
   4  -9   2 67.3635  7.0098   5
   5  -9   2 373.607  32.240   2
   5  -9   2 351.413  23.939   1
   5  -9   2 344.641  28.204   5
   5  -9   2 325.183  28.814   3
   6  -9   2 16.6939  4.4605   2
   6  -9   2 34.1440  5.8179   1
   6  -9   2 17.1214  5.3725   3
   7  -9   2 160.443  14.377   2
   7  -9   2 164.434  20.549   5
   7  -9   2 157.286  18.765   1
   7  -9   2 180.335  16.149   3
   8  -9   2 82.8893 10.2938   2
   8  -9   2 62.6610 13.2984   3
   8  -9   2 80.4962 11.2578   5
   8  -9   2 71.6463 11.4352   1
  -9   9  -2 13.7040  7.2062   7
   9  -9   2 21.6532  7.3875   2
   9  -9   2 13.9048  8.4326   5
   9  -9   2 27.3169  8.4023   3
  10   8  -2 3.70870 9.37399   3
 -10  -8   2 21.5069 10.0882   4
   9   8  -2 31.1953  5.2986   1
   9   8  -2 28.1773  8.4757   3
  -9  -8   2 38.7790  9.9065   4
   8   8  -2 29.7737  8.2713   3
   8   8  -2 42.0355  6.0903   1
  -8  -8   2 35.2275  9.4874   4
   7   8  -2 7.14486 6.35906   3
   7   8  -2 3.74299 3.92957   1
  -7  -8   2 1.19684 5.53522   4
   6   8  -2 305.676  15.125   1
   6   8  -2 301.641  28.803   3
  -6  -8   2 319.039  37.690   4
   5   8  -2 0.78382 3.57849   1
   5   8  -2 0.36080 3.50811   3
  -5  -8   2 4.45103 3.94492   1
  -5  -8   2 3.51631 4.11050   4
   4   8  -2 284.177  19.218   1
  -4  -8   2 302.859  24.629   1
  -4  -8   2 302.202  33.236   4
   3   8  -2 15.3677  4.1789   1
  -3  -8   2 23.0586  4.6691   1
  -3  -8   2 10.5013  2.6401   5
  -3  -8   2 15.2837  3.5672   4
   2   8  -2 30.8205  4.0993   1
  -2  -8   2 26.7672  3.4119   1
  -2  -8   2 20.2631  3.3586   3
  -2  -8   2 24.5974  3.7221   5
  -2  -8   2 25.5915  4.2632   4
   1   8  -2 6.41651 3.58278   1
  -1  -8   2 1.88339 1.79783   3
  -1  -8   2 1.34614 2.01724   5
  -1  -8   2 -2.0525  2.3285   4
  -1  -8   2 6.00670 3.20312   1
   0   8  -2 133.814   9.599   1
   0  -8   2 147.905  11.928   5
   0  -8   2 133.765  11.386   4
   0  -8   2 125.830   8.504   2
   0  -8   2 120.176   9.905   3
   0  -8   2 121.264   8.322   1
  -1   8  -2 13.8228  3.4990   1
   1  -8   2 15.8241  3.9597   4
   1  -8   2 11.0456  2.2179   2
   1  -8   2 17.7986  3.3237   1
   1  -8   2 14.9574  3.4037   5
  -2   8  -2 73.4308  5.7438   1
   2  -8   2 68.5451  5.5554   2
   2  -8   2 56.9904  6.1537   1
   2  -8   2 56.3398  5.0638   5
   2  -8   2 63.1905  5.8681   3
   2  -8   2 67.5038  8.1517   4
  -3   8  -2 14.6472  3.5189   1
   3  -8   2 15.1321  3.0985   3
   3  -8   2 23.7074  3.8743   5
   3  -8   2 14.6195  3.2138   1
   3  -8   2 12.5747  3.0466   2
   3  -8   2 14.2572  3.9800   4
  -4   8  -2 183.988  14.550   1
   4  -8   2 214.630  16.256   3
   4  -8   2 179.645  10.316   2
   4  -8   2 171.514  15.716   1
   4  -8   2 192.362  17.338   4
   4  -8   2 208.886  15.164   5
  -5   8  -2 -0.8948  2.5821   1
   5  -8   2 0.66454 3.26677   3
   5  -8   2 3.46258 3.08338   1
   5  -8   2 1.73910 3.12588   2
   5  -8   2 0.76239 3.81948   5
   6  -8   2 275.439  18.129   2
   6  -8   2 244.711  25.583   1
   6  -8   2 227.533  16.326   5
   6  -8   2 236.864  18.466   3
   7  -8   2 7.61798 4.47035   2
   7  -8   2 3.64099 3.64110   1
   7  -8   2 0.39644 4.38074   3
   7  -8   2 8.03835 4.80309   5
   8  -8   2 10.7935  3.8079   1
   8  -8   2 9.80562 6.14858   3
   8  -8   2 10.6761  4.9065   2
   8  -8   2 11.9628  6.5274   5
  -9   8  -2 1.62958 6.80862   7
   9  -8   2 0.76157 6.61956   3
   9  -8   2 1.26188 5.66796   2
   9  -8   2 -1.5960  6.8620   5
 -10   8  -2 8.60348 8.45523   7
  10  -8   2 4.56498 7.57256   2
  10  -8   2 9.78935 7.30050   3
  10  -8   2 -9.4186  8.3194   5
  10   7  -2 12.7315  7.1062   3
 -10  -7   2 -1.4608  8.5272   4
   9   7  -2 33.2473  5.2177   1
   9   7  -2 22.2687  7.2808   3
  -9  -7   2 26.8334 10.3329   4
   8   7  -2 2.66469 3.61699   1
   8   7  -2 6.26532 4.76268   3
  -8  -7   2 7.49537 5.78751   4
   7   7  -2 10.7508  3.6366   1
   7   7  -2 8.49588 4.15730   3
  -7  -7   2 15.4339  5.5076   4
   6   7  -2 111.061  14.280   3
   6   7  -2 127.920   9.383   1
  -6  -7   2 134.733  16.371   4
  -6  -7   2 113.888  11.814   1
   5   7  -2 169.984   9.564   1
   5   7  -2 178.848  14.445   3
  -5  -7   2 168.658  10.448   1
  -5  -7   2 176.589  12.737   4
   4   7  -2 21.8246  4.0612   3
   4   7  -2 18.3364  3.3402   1
  -4  -7   2 17.7325  3.9726   4
   3   7  -2 200.978  10.143   1
  -3  -7   2 146.042  12.870   2
  -3  -7   2 189.076  14.193   4
  -3  -7   2 196.588  11.788   1
   2   7  -2 29.3005  3.6342   1
  -2  -7   2 23.2941  3.2210   3
  -2  -7   2 30.5880  4.1846   1
  -2  -7   2 25.8225  3.8884   4
  -2  -7   2 26.1069  3.5382   5
   1   7  -2 615.378  25.221   1
  -1  -7   2 651.869  36.779   3
  -1  -7   2 696.333  71.982   4
  -1  -7   2 665.957  62.472   5
  -1  -7   2 673.899  31.139   1
   0   7  -2 21.4568  4.2119   1
   0  -7   2 13.2794  1.9547   3
   0  -7   2 11.4624  1.6924   2
   0  -7   2 16.3739  3.0687   4
   0  -7   2 14.5174  2.7118   5
   0  -7   2 18.4020  3.8972   1
  -1   7  -2 1398.65   70.83   1
  -1   7  -2 1328.11  100.47   4
   1  -7   2 1326.58   78.51   2
   1  -7   2 1437.83  120.86   4
   1  -7   2 1380.44   63.02   1
   1  -7   2 1390.05   88.68   5
  -2   7  -2 1.94992 1.96247   4
  -2   7  -2 5.32298 2.62359   1
   2  -7   2 0.25410 1.62342   2
   2  -7   2 0.09859 2.16047   5
   2  -7   2 3.11374 2.22779   4
   2  -7   2 4.32948 2.85269   1
   2  -7   2 7.39346 3.03907   3
  -3   7  -2 569.296  29.579   1
  -3   7  -2 499.258  57.397   4
   3  -7   2 597.433  42.358   4
   3  -7   2 589.672  38.104   3
   3  -7   2 551.989  26.117   2
   3  -7   2 609.630  56.534   5
   3  -7   2 575.852  31.869   1
  -4   7  -2 6.71621 2.72201   1
   4  -7   2 4.45253 3.12699   2
   4  -7   2 4.08564 2.95354   4
   4  -7   2 8.48433 3.34575   5
   4  -7   2 5.82217 2.68531   1
   4  -7   2 4.93732 2.82192   3
  -5   7  -2 41.4586  5.1212   1
   5  -7   2 44.8109  4.9888   3
   5  -7   2 45.2721  4.9735   2
   5  -7   2 37.8640  4.7826   1
   5  -7   2 41.5713  5.3724   5
   6  -7   2 10.5961  4.5530   5
   6  -7   2 15.2989  4.3336   2
   6  -7   2 20.4095  4.1408   3
   6  -7   2 7.37215 3.48220   1
   7  -7   2 44.3221  5.1889   1
   7  -7   2 56.3820  9.2628   5
   7  -7   2 52.9155  6.0257   3
   7  -7   2 55.3143  6.4151   2
  -8   7  -2 3.81630 5.18259   7
   8  -7   2 -0.6797  4.6389   5
   8  -7   2 11.3603  5.7410   2
   8  -7   2 4.12967 3.40981   1
   8  -7   2 3.47389 4.29710   3
  -9   7  -2 8.32319 5.35357   7
   9  -7   2 8.31006 5.84342   5
   9  -7   2 9.18220 5.87492   2
   9  -7   2 14.8265  6.9233   3
 -10   7  -2 30.3555  9.4469   7
  10  -7   2 11.4200  7.7876   2
  10  -7   2 13.6987  7.3283   3
  10  -7   2 9.07827 5.34977   5
  10   6  -2 65.6303  9.4005   3
 -10  -6   2 62.2978 10.1952   4
   9   6  -2 39.0623  5.8503   1
   9   6  -2 52.7492  8.4408   3
  -9  -6   2 25.8358  7.5241   4
   8   6  -2 83.7695  6.7154   1
   8   6  -2 61.0781  8.8682   3
  -8  -6   2 73.5061  9.4985   4
   7   6  -2 9.19148 3.24638   1
   7   6  -2 8.91855 3.44413   3
  -7  -6   2 10.6729  4.3318   4
   6   6  -2 93.6292  7.1858   1
   6   6  -2 84.3060  8.4043   3
  -6  -6   2 90.2935  8.5508   1
  -6  -6   2 77.0200  9.4271   4
   5   6  -2 5.22549 3.14630   3
   5   6  -2 4.11416 2.61654   1
   5   6  -2 4.69800 2.05663   8
  -5  -6   2 7.41089 4.13425   4
  -5  -6   2 10.4292  2.8794   1
   4   6  -2 76.4183  8.1312   8
   4   6  -2 96.9579  8.1792   3
   4   6  -2 80.5582  5.0905   1
  -4  -6   2 87.6261  9.9835   4
  -4  -6   2 83.4748  5.9203   1
   3   6  -2 39.7346  4.2117   1
   3   6  -2 42.3785  4.1331   3
  -3  -6   2 42.3717  6.0424   4
  -3  -6   2 44.0513  4.4481   1
   2   6  -2 1440.66   50.59   1
  -2  -6   2 1549.48   81.06   3
  -2  -6   2 1431.36   69.31   1
  -2  -6   2 1357.02   74.03   4
   1   6  -2 12.4700  3.0718   1
  -1  -6   2 14.0039  2.4289   5
  -1  -6   2 13.7614  2.1592   3
  -1  -6   2 15.9485  3.2089   4
  -1  -6   2 12.0782  3.1644   1
   0   6  -2 3.28482 1.16262   4
   0   6  -2 1.61907 2.53731   1
   0  -6   2 4.54358 2.46510   1
   0  -6   2 0.72567 1.67934   4
   0  -6   2 3.26907 1.82945   5
   0  -6   2 3.41317 1.48231   2
  -1   6  -2 12.5761  3.1483   1
  -1   6  -2 8.52836 1.57276   4
   1  -6   2 7.13056 1.74344   2
   1  -6   2 6.92398 2.64996   1
   1  -6   2 7.11978 2.94707   4
   1  -6   2 6.45771 2.17112   5
  -2   6  -2 592.249  27.211   1
  -2   6  -2 612.912  54.795   4
   2  -6   2 639.094  47.813   4
   2  -6   2 632.091  36.891   2
   2  -6   2 602.979  50.624   5
   2  -6   2 631.750  40.835   3
   2  -6   2 612.014  35.170   1
  -3   6  -2 49.9057  5.1117   4
  -3   6  -2 74.1703  4.8139   1
   3  -6   2 57.9726  5.1466   4
   3  -6   2 65.1303  6.1134   5
   3  -6   2 65.5809  4.9467   1
   3  -6   2 66.5617  5.4843   2
   3  -6   2 49.6178  5.0077   1
   3  -6   2 63.2644  5.3784   3
  -4   6  -2 47.8943  4.2267   1
   4  -6   2 45.2364  5.1792   5
   4  -6   2 41.4404  4.0485   1
   4  -6   2 36.4596  4.7524   3
   4  -6   2 42.4547  4.0403   2
   4  -6   2 40.2154  4.1082   1
  -5   6  -2 15.5577  3.0007   1
   5  -6   2 10.5426  2.8587   1
   5  -6   2 12.6005  2.1335   6
   5  -6   2 21.3519  4.2910   2
   5  -6   2 14.1463  2.5725   1
   6  -6   2 -2.2688  3.8087   2
   6  -6   2 -0.5390  2.2353   1
   6  -6   2 1.60276 3.05426   3
   6  -6   2 -0.5070  3.6136   5
   7  -6   2 195.839  21.483   1
   7  -6   2 229.875  18.827   3
   7  -6   2 226.836  15.723   5
   7  -6   2 215.741  17.188   2
  -8   6  -2 24.7923  6.0196   7
   8  -6   2 27.9929  6.5545   5
   8  -6   2 32.8839  5.6312   3
   8  -6   2 21.8000  6.9439   2
   8  -6   2 23.6818  4.3481   1
  -9   6  -2 11.3631  5.7704   7
   9  -6   2 5.89287 6.24248   2
   9  -6   2 10.7373  5.2436   3
   9  -6   2 23.8151 63.9759   5
 -10   6  -2 177.330  26.080   7
  10  -6   2 168.959  14.455   3
  10  -6   2 176.628  16.408   5
  10  -6   2 132.001  16.139   2
  11   5  -2 83.9281 10.9510   3
 -11  -5   2 94.9451 12.6440   7
 -11  -5   2 110.965  15.537   4
  10   5  -2 8.93182 6.44976   3
 -10  -5   2 33.6927  8.7272   4
 -10  -5   2 14.4639  8.9785   7
   9   5  -2 165.923  15.425   1
   9   5  -2 207.757  17.532   3
  -9  -5   2 157.133  14.803   7
  -9  -5   2 185.596  17.371   4
   8   5  -2 68.8102  7.1372   3
   8   5  -2 53.2603  4.9212   1
  -8  -5   2 60.0021  9.2172   7
  -8  -5   2 70.6784  7.5091   4
   7   5  -2 3.52610 4.04926   3
   7   5  -2 3.45993 2.51326   1
  -7  -5   2 -0.5943  4.1718   4
  -7  -5   2 1.36637 4.07268   7
   6   5  -2 6.81213 3.42424   3
   6   5  -2 4.21675 1.92201   1
  -6  -5   2 3.62592 3.46366   4
  -6  -5   2 5.88632 2.97699   1
   5   5  -2 12.3846  2.7738   1
   5   5  -2 9.49587 2.19259   8
   5   5  -2 13.6269  2.4887   1
   5   5  -2 12.3715  2.8365   3
  -5  -5   2 12.7781  3.9962   4
  -5  -5   2 11.5952  3.0062   1
   4   5  -2 0.46197 1.90712   3
   4   5  -2 -0.7225  1.7917   8
   4   5  -2 1.60552 2.37126   1
   4   5  -2 0.04662 2.09447   1
  -4  -5   2 -0.1418  2.2175   1
  -4  -5   2 0.72222 2.29267   4
   3   5  -2 780.381  26.922   1
   3   5  -2 712.215  42.683   1
   3   5  -2 763.181  48.695   3
  -3  -5   2 810.672  38.059   1
  -3  -5   2 804.648  46.838   4
  -3  -5   2 688.792  52.671   2
   2   5  -2 84.5683  8.6821   3
   2   5  -2 97.9712  5.1880   1
   2   5  -2 93.5511  9.0347   1
  -2  -5   2 98.3484  6.2755   1
  -2  -5   2 84.4422  7.1839   4
  -2  -5   2 87.4989  6.9115   3
   1   5  -2 736.846  55.032   4
   1   5  -2 745.246  26.910   1
  -1  -5   2 666.330  42.703   4
  -1  -5   2 768.400  82.476   5
  -1  -5   2 696.014  36.797   3
  -1  -5   2 735.745  40.728   1
   0   5  -2 52.2088  4.6251   1
   0   5  -2 45.7169  4.1573   4
   0  -5   2 57.9852  4.7413   1
   0  -5   2 57.9037  4.9329   4
   0  -5   2 57.7202  5.7020   5
  -1   5  -2 30.6840  2.9891   4
  -1   5  -2 39.2615  3.3643   1
  -1   5  -2 35.2382  4.4528   5
   1  -5   2 33.6154  3.3242   1
   1  -5   2 36.6915  4.9655   5
   1  -5   2 40.7719  2.9081   2
   1  -5   2 29.3277  3.3835   4
   1  -5   2 34.0652  3.4920   1
  -2   5  -2 215.801  11.489   1
  -2   5  -2 248.631  15.254   2
  -2   5  -2 209.381  21.321   4
   2  -5   2 213.964  12.464   3
   2  -5   2 215.784  15.765   2
   2  -5   2 199.321  11.803   1
   2  -5   2 205.611  14.229   5
   2  -5   2 216.829  16.317   4
   2  -5   2 205.179  12.466   1
  -3   5  -2 1366.43   65.20   1
  -3   5  -2 1348.41  104.25   4
   3  -5   2 1376.54   63.18   1
   3  -5   2 1268.98   81.98   1
   3  -5   2 1281.34   57.86   3
   3  -5   2 1450.23  122.75   5
   3  -5   2 1415.62  101.54   4
   3  -5   2 1307.95   66.94   2
  -4   5  -2 36.1441  3.5407   1
  -4   5  -2 31.6545  4.1355   4
   4  -5   2 34.8730  3.4879   1
   4  -5   2 37.4315  3.9385   2
   4  -5   2 30.6250  4.5278   5
   4  -5   2 38.8282  3.8289   1
   4  -5   2 35.4973  3.5818   3
   4  -5   2 35.9467  2.6373   6
  -5   5  -2 92.5964  7.1160   1
   5  -5   2 74.3582  6.7430   2
   5  -5   2 81.3602  5.5480   1
   5  -5   2 96.7045  5.6624   3
   5  -5   2 85.1354  5.9083   6
   5  -5   2 77.9544  6.8236   1
   5  -5   2 90.4941  8.4899   5
   6  -5   2 127.447   9.398   3
   6  -5   2 114.195   8.259   2
   6  -5   2 111.437  10.785   1
   6  -5   2 129.508  11.658   5
  -7   5  -2 167.252  14.187   7
   7  -5   2 174.108  12.738   3
   7  -5   2 150.454  13.865   1
   7  -5   2 157.199  12.901   2
   7  -5   2 159.652  15.960   5
  -8   5  -2 11.4007  5.9630   7
   8  -5   2 17.9467  6.2696   2
   8  -5   2 20.0950  5.1120   3
   8  -5   2 9.98701 2.36355   1
   8  -5   2 13.6265  6.1083   5
  -9   5  -2 29.0358  6.3308   4
  -9   5  -2 38.3291  9.7492   7
   9  -5   2 44.9458  7.3647   2
   9  -5   2 46.4705  6.7792   5
   9  -5   2 31.7276  7.4354   3
 -10   5  -2 196.178  22.031   7
  10  -5   2 170.213  15.530   5
  10  -5   2 176.890  22.459   3
  10  -5   2 168.579  19.411   2
 -11   5  -2 17.3310  8.8587   7
  11  -5   2 12.2906  7.8786   3
  11  -5   2 9.85556 8.58245   5
  11   4  -2 102.319  16.557   3
 -11  -4   2 91.0942 14.0915   4
 -11  -4   2 105.712  14.831   7
  10   4  -2 139.309  13.900   3
 -10  -4   2 132.193  16.388   7
 -10  -4   2 176.371  16.622   4
   9   4  -2 8.43899 3.32747   1
   9   4  -2 5.95656 4.45589   3
  -9  -4   2 4.60193 6.05339   4
  -9  -4   2 -4.4859  6.1080   7
   8   4  -2 55.8905  5.1929   1
   8   4  -2 54.1383  7.4562   3
  -8  -4   2 63.1337  8.5046   7
  -8  -4   2 58.6015  9.7033   4
   7   4  -2 6.23044 3.31287   3
   7   4  -2 1.16774 1.87245   1
  -7  -4   2 3.32916 2.81415   7
  -7  -4   2 2.84092 3.34084   4
   6   4  -2 5.16668 2.83925   1
   6   4  -2 5.29639 2.36386   1
   6   4  -2 1.58571 3.19071   3
  -6  -4   2 3.26583 2.27250   1
  -6  -4   2 6.42169 4.26843   4
  -6  -4   2 -0.2193  3.4855   7
   5   4  -2 40.5309  4.9993   1
   5   4  -2 46.6403  4.3377   3
   5   4  -2 46.2638  3.8175   1
  -5  -4   2 38.0480  4.3153   7
  -5  -4   2 37.5785  4.4061   4
  -5  -4   2 36.0574  3.6375   1
   4   4  -2 86.9623  5.3993   3
   4   4  -2 83.7371  5.0230   1
   4   4  -2 80.2919  6.7965   1
   4   4  -2 76.7726  6.9268   8
  -4  -4   2 87.4415  5.2078   1
  -4  -4   2 70.7941  5.3292   4
   3   4  -2 28.3358  2.3180   8
   3   4  -2 28.6085  2.8260   3
   3   4  -2 26.7484  2.9000   1
   3   4  -2 30.5949  3.0387   1
  -3  -4   2 23.5919  3.0004   2
  -3  -4   2 32.1522  3.9550   4
  -3  -4   2 26.7211  3.2146   1
   2   4  -2 62.4024  5.3500   3
   2   4  -2 62.1474  4.5219   1
   2   4  -2 62.5188  3.9202   1
   2   4  -2 60.8862  4.9077   4
  -2  -4   2 70.2038  5.6839   4
  -2  -4   2 65.1314  4.6019   3
  -2  -4   2 64.4427  4.0025   1
   1   4  -2 78.0382  5.5591   1
   1   4  -2 92.9038  6.9969   4
   1   4  -2 90.3285  5.7162   1
  -1  -4   2 89.3781  9.8063   1
  -1  -4   2 90.3721  7.5018   4
  -1  -4   2 91.2137  5.4848   3
  -1  -4   2 84.8497  5.6323   1
   0   4  -2 2804.64  166.46   1
   0   4  -2 3644.90  291.32   4
   0  -4   2 2543.51  150.50   1
  -1   4  -2 -2.9959  0.9243   4
  -1   4  -2 -2.1905  1.7365   5
  -1   4  -2 -2.4542  1.9288   1
   1  -4   2 -2.7903  1.1302   4
   1  -4   2 -1.3741  2.1878   1
   1  -4   2 -2.5147  1.7013   1
   1  -4   2 -1.1368  1.2499   2
   1  -4   2 3.37518 2.23298   5
  -2   4  -2 1408.71   96.74   2
  -2   4  -2 1289.51   56.01   1
  -2   4  -2 1385.08   85.08   4
   2  -4   2 1367.89  118.62   5
   2  -4   2 1345.19   91.33   4
   2  -4   2 1288.75   72.40   1
   2  -4   2 1403.79   86.45   2
   2  -4   2 1240.29   66.27   1
   2  -4   2 1317.15   69.21   3
  -3   4  -2 69.8217  4.5228   1
  -3   4  -2 74.7787  8.1857   4
   3  -4   2 71.4390  5.2894   5
   3  -4   2 80.0915  4.9312   3
   3  -4   2 71.2076  4.7854   1
   3  -4   2 55.5028  4.4102   1
   3  -4   2 68.2116  4.6807   2
  -4   4  -2 38.6031  3.3996   1
  -4   4  -2 38.3269  4.7265   4
   4  -4   2 39.2010  3.4619   6
   4  -4   2 52.0284  4.8607   5
   4  -4   2 44.5550  3.8560   3
   4  -4   2 38.1007  2.7787   1
   4  -4   2 52.5436  4.1378   2
   4  -4   2 51.4730  3.3554   1
  -5   4  -2 51.0139  4.1714   1
   5  -4   2 64.0077  5.6658   2
   5  -4   2 51.5413  3.8119   1
   5  -4   2 61.8932  4.8962   5
   5  -4   2 58.2488  5.4256   3
   5  -4   2 51.5290  3.8333   1
   5  -4   2 43.5559  3.5014   6
  -6   4  -2 58.4975  5.7029   1
   6  -4   2 55.0986  3.8283   1
   6  -4   2 65.1454  6.7324   5
   6  -4   2 48.8043  6.1119   2
   6  -4   2 67.5709  7.2671   3
   6  -4   2 61.4034  4.2465   1
  -7   4  -2 15.8197  4.9110   7
   7  -4   2 12.8091  4.8449   2
   7  -4   2 11.1704  4.6926   3
   7  -4   2 8.19596 3.73982   5
   7  -4   2 13.3772  2.0710   1
  -8   4  -2 34.5580  5.7123   7
   8  -4   2 37.7782  6.4382   3
   8  -4   2 36.6172  5.8203   5
   8  -4   2 32.7306  6.8973   2
  -9   4  -2 159.169  14.229   7
  -9   4  -2 134.972  11.095   4
   9  -4   2 131.933  11.096   2
   9  -4   2 140.004  14.698   5
   9  -4   2 163.520  12.879   3
 -10   4  -2 80.6780 11.8295   7
 -10   4  -2 64.1547  8.8139   4
  10  -4   2 68.8334  9.4664   5
  10  -4   2 72.2702  9.5732   2
  10  -4   2 90.4374 11.9727   3
 -11   4  -2 48.9905 15.0266   7
  11  -4   2 60.6944 13.1485   5
  11  -4   2 57.3165 10.1321   3
  11   3  -2 94.9442 11.0210   3
 -11  -3   2 69.0317 11.4017   7
 -11  -3   2 83.6937 11.8426   4
  10   3  -2 79.8558  9.5200   3
 -10  -3   2 72.7135 11.0642   7
 -10  -3   2 99.2348 13.8888   4
   9   3  -2 3.89196 4.46620   3
  -9  -3   2 -3.0675  4.7012   4
  -9  -3   2 6.86602 6.35656   7
   8   3  -2 236.055  14.844   3
   8   3  -2 202.996  14.819   1
  -8  -3   2 240.230  21.236   7
  -8  -3   2 217.247  15.838   4
   7   3  -2 171.301  11.997   3
   7   3  -2 164.417   8.708   1
  -7  -3   2 159.174  13.335   4
  -7  -3   2 174.115  10.947   7
  -7  -3   2 154.756  13.548   8
   6   3  -2 65.7400  5.9492   3
   6   3  -2 60.7763  6.5699   1
   6   3  -2 59.0072  4.1003   1
  -6  -3   2 60.5644  7.0533   4
  -6  -3   2 54.6301  4.6442   1
  -6  -3   2 55.7954  6.4450   7
   5   3  -2 75.7144  5.2624   1
   5   3  -2 82.2196  6.2331   3
   5   3  -2 80.7389  4.9158   1
  -5  -3   2 87.3772  7.7604   7
  -5  -3   2 78.2590  6.8696   4
  -5  -3   2 77.6527  4.9434   1
   4   3  -2 -1.8465  1.9480   1
   4   3  -2 2.11927 1.78661   1
   4   3  -2 -0.7330  1.2551   8
   4   3  -2 4.57136 2.45280   3
  -4  -3   2 4.56093 2.05298   1
  -4  -3   2 1.62491 2.46808   7
  -4  -3   2 1.27408 2.21210   4
   3   3  -2 54.2724  4.2237   1
   3   3  -2 57.4649  4.2960   8
   3   3  -2 49.1841  4.6189   3
   3   3  -2 49.1519  3.1373   1
  -3  -3   2 54.9784  3.9362   1
  -3  -3   2 46.9550  4.8548   7
  -3  -3   2 51.3821  4.6297   2
  -3  -3   2 40.8900  4.6141   3
  -3  -3   2 48.5660  4.1032   4
   2   3  -2 51.5325  5.8330   7
   2   3  -2 51.2012  4.0129   1
   2   3  -2 46.0118  3.2048   1
   2   3  -2 47.1025  3.3618   3
  -2  -3   2 44.8291  3.0488   1
  -2  -3   2 49.4884  3.3654   3
  -2  -3   2 39.0232  3.8948   4
   1   3  -2 319.970  24.118   3
   1   3  -2 260.940  15.065   4
   1   3  -2 301.267  11.274   1
   1   3  -2 307.994  12.578   1
  -1  -3   2 300.579  17.051   4
  -1  -3   2 258.425  17.014   3
  -1  -3   2 308.850  15.367   1
  -1  -3   2 312.813  13.525   1
   0   3  -2 44.4346  3.5015   1
   0   3  -2 39.5708  3.4979   1
   0   3  -2 40.9656  2.5195   4
   0  -3   2 40.4745  3.4117   4
   0  -3   2 46.6769  3.7654   1
   0  -3   2 43.7284  3.4650   1
   0  -3   2 39.2693  2.3710   3
   0  -3   2 35.5918  4.5705   5
   1  -3   2 935.536 255.976   4
  -2   3  -2 398.329  13.785   2
  -2   3  -2 403.688  17.995   4
  -2   3  -2 358.577  37.868   5
  -2   3  -2 403.416  14.975   1
  -2   3  -2 375.395  15.884   1
   2  -3   2 413.224  28.353   5
   2  -3   2 394.677  29.291   4
   2  -3   2 393.029  28.477   2
   2  -3   2 378.168  15.813   1
   2  -3   2 395.919  19.046   3
   2  -3   2 368.465  20.434   1
  -3   3  -2 739.859  41.969   3
  -3   3  -2 719.968  37.783   1
  -3   3  -2 754.657  56.777   4
  -3   3  -2 750.239  32.110   1
   3  -3   2 737.485  22.457   1
   3  -3   2 738.425  45.623   2
   3  -3   2 696.824  33.216   3
   3  -3   2 716.142  42.107   1
   3  -3   2 752.619  45.765   6
   3  -3   2 744.921  51.291   5
  -4   3  -2 0.27552 1.80139   4
  -4   3  -2 2.17612 1.36991   1
   4  -3   2 1.18619 1.61476   1
   4  -3   2 0.61258 1.89654   2
   4  -3   2 3.38168 2.36856   5
   4  -3   2 1.76802 2.52033   3
   4  -3   2 2.02607 1.44835   1
   4  -3   2 -0.2000  1.4601   6
  -5   3  -2 80.0589  4.5706   1
   5  -3   2 86.4292  8.1127   2
   5  -3   2 79.3698  7.5749   5
   5  -3   2 87.0950  7.3679   1
   5  -3   2 73.6484  7.3439   3
  -6   3  -2 19.2970  3.6148   7
  -6   3  -2 22.3137  1.9411   1
   6  -3   2 20.3735  2.2053   1
   6  -3   2 22.9433  4.4827   3
   6  -3   2 14.3516  4.3502   2
   6  -3   2 18.6492  2.2509   1
   6  -3   2 21.0234  3.6827   5
  -7   3  -2 119.044   9.552   7
   7  -3   2 128.924  10.161   2
   7  -3   2 121.425   6.744   1
   7  -3   2 108.616   8.675   3
   7  -3   2 126.939  11.185   5
   7  -3   2 103.623   7.323   1
  -8   3  -2 9.80160 3.96356   4
  -8   3  -2 7.69059 4.78654   7
   8  -3   2 6.01640 3.82728   5
   8  -3   2 4.53243 3.68569   2
   8  -3   2 0.91209 4.00849   3
  -9   3  -2 161.575  14.597   4
  -9   3  -2 173.160  15.954   7
   9  -3   2 152.397  13.788   2
   9  -3   2 175.357  11.280   5
   9  -3   2 188.721  14.650   3
 -10   3  -2 83.0610 10.3153   4
 -10   3  -2 73.1226  9.1049   7
  10  -3   2 104.047  12.628   3
  10  -3   2 84.9532 12.7405   5
  10  -3   2 99.7269 11.0495   2
 -11   3  -2 4.51951 7.81837   7
 -11   3  -2 6.14898 5.43797   4
  11  -3   2 2.18621 6.41936   3
  11  -3   2 9.94217 5.89769   5
  11   2  -2 16.5840  7.7270   3
 -11  -2   2 -4.6364  8.4870   7
 -11  -2   2 28.0937 10.0562   4
  10   2  -2 100.784  11.543   3
 -10  -2   2 87.6056 13.3426   4
 -10  -2   2 99.7922 13.6193   7
   9   2  -2 2.06315 4.66434   3
  -9  -2   2 9.72299 5.15090   4
  -9  -2   2 8.68912 5.58728   7
   8   2  -2 322.621  18.710   3
   8   2  -2 286.162  15.907   1
  -8  -2   2 308.058  33.605   8
  -8  -2   2 335.709  21.685   4
  -8  -2   2 319.864  20.993   7
   7   2  -2 30.8209  2.9280   1
   7   2  -2 26.2003  4.7095   3
  -7  -2   2 30.9176  6.8316   7
  -7  -2   2 39.3895  6.0580   4
  -7  -2   2 29.7460  3.8823   8
   6   2  -2 238.494  12.871   3
   6   2  -2 243.168  20.737   1
   6   2  -2 210.211  10.921   1
  -6  -2   2 245.788  12.146   4
  -6  -2   2 217.892   9.371   1
  -6  -2   2 229.628  13.895   7
  -6  -2   2 225.971  11.212   8
   5   2  -2 10.6093  2.0166   1
   5   2  -2 4.39451 2.74015   3
   5   2  -2 8.76013 1.86147   1
  -5  -2   2 9.72518 2.42275   8
  -5  -2   2 8.08279 2.79834   7
  -5  -2   2 8.05403 1.96345   1
  -5  -2   2 14.9473  3.5666   4
   4   2  -2 687.535  48.586   3
   4   2  -2 721.074  36.657   1
   4   2  -2 575.888  24.012   1
  -4  -2   2 651.303  35.232   7
  -4  -2   2 655.839  29.289   4
  -4  -2   2 683.980  34.395   8
  -4  -2   2 634.401  25.180   1
   3   2  -2 73.7278  4.3981   1
   3   2  -2 80.2181  7.1313   7
   3   2  -2 76.2736  4.8949   8
   3   2  -2 68.9105  4.5090   1
   3   2  -2 67.1937  4.8302   3
  -3  -2   2 76.6428  5.7535   7
  -3  -2   2 77.8120  4.2222   1
  -3  -2   2 74.8192  4.8388   4
  -3  -2   2 74.0839  4.8604   1
  -3  -2   2 71.8803  6.8496   3
  -3  -2   2 77.7863  5.5154   8
  -3  -2   2 67.3312  6.1429   2
   2   2  -2 286.973  16.522   3
   2   2  -2 355.258  20.185   7
   2   2  -2 375.973  22.404   8
   2   2  -2 320.856  15.533   1
   2   2  -2 321.133  19.060   1
  -2  -2   2 347.950  22.031   7
  -2  -2   2 320.729  18.679   1
  -2  -2   2 275.489  14.174   4
  -2  -2   2 329.368  13.756   3
  -2  -2   2 321.513  12.669   1
   1   2  -2 70.1826  4.3320   1
   1   2  -2 59.3410  4.3418   1
   1   2  -2 79.7379  5.2725   3
  -1  -2   2 70.2634  5.1124   3
  -1  -2   2 58.2870  4.4448   1
  -1  -2   2 68.1606  4.4787   1
  -1  -2   2 67.7799  4.2144   4
   0   2  -2 869.648  37.126   1
   0   2  -2 841.980  42.457   1
   0  -2   2 862.370  42.655   1
   0  -2   2 872.021  45.519   1
   0  -2   2 763.925  52.406   4
   0  -2   2 861.674  82.009   5
   0  -2   2 678.901  34.309   3
  -1   2  -2 18.3929  2.0166   1
  -1   2  -2 19.4372  1.5522   3
  -1   2  -2 15.4086  2.1156   5
  -1   2  -2 18.2415  2.1602   2
  -1   2  -2 17.9943  1.5817   4
  -1   2  -2 17.0532  1.6970   1
   1  -2   2 19.5625  2.4208   2
   1  -2   2 17.5950  1.5422   3
   1  -2   2 15.5986  1.9718   1
   1  -2   2 20.9370  1.5095   4
   1  -2   2 20.0010  2.4688   5
   1  -2   2 22.4798  2.3953   1
  -2   2  -2 217.426   9.080   3
  -2   2  -2 228.238  11.287   1
  -2   2  -2 226.359  10.283   1
  -2   2  -2 242.151  13.747   2
  -2   2  -2 231.924  22.388   5
  -2   2  -2 242.727  15.610   4
   2  -2   2 212.241  11.620   1
   2  -2   2 219.497  11.506   3
   2  -2   2 217.855  13.634   2
   2  -2   2 241.257  13.557   5
   2  -2   2 233.938  12.942   1
  -3   2  -2 391.743  33.427   2
  -3   2  -2 415.963  26.346   4
  -3   2  -2 408.424  26.780   3
  -3   2  -2 387.375  21.194   1
  -3   2  -2 404.602  22.055   1
   3  -2   2 414.566  17.369   1
   3  -2   2 409.881  22.384   5
   3  -2   2 365.546  22.876   1
   3  -2   2 423.206  17.937   6
   3  -2   2 452.453  31.051   2
   3  -2   2 424.900  27.036   3
   4  -2   2 3959.88  183.40   1
   4  -2   2 4116.95  197.53   2
   4  -2   2 4094.34  165.71   5
   4  -2   2 4225.65  253.92   3
  -5   2  -2 -0.0340  1.1447   6
  -5   2  -2 1.01164 0.89866   1
  -5   2  -2 1.04654 1.04084   1
  -5   2  -2 -2.4808  1.5630   7
   5  -2   2 3.54979 2.43634   2
   5  -2   2 -2.6361  2.0877   5
   5  -2   2 2.92206 1.06382   1
   5  -2   2 1.74795 1.04790   1
   5  -2   2 5.18352 3.60808   3
  -6   2  -2 106.495   6.026   6
  -6   2  -2 113.349   4.523   1
  -6   2  -2 111.031   7.649   7
   6  -2   2 106.142   7.874   3
   6  -2   2 95.9228  5.7178   1
   6  -2   2 103.921   8.230   5
   6  -2   2 112.174   5.737   1
  -7   2  -2 396.473  26.946   4
  -7   2  -2 446.765  23.922   7
  -7   2  -2 402.779  25.033   6
   7  -2   2 428.659  25.656   3
   7  -2   2 443.553  18.585   2
   7  -2   2 433.966  24.872   5
  -8   2  -2 16.1916  5.1565   7
  -8   2  -2 11.0062  4.5931   4
   8  -2   2 18.6233  5.5895   2
   8  -2   2 14.6700  5.6506   3
   8  -2   2 14.6735  4.8000   5
  -9   2  -2 19.7227  6.1554   7
  -9   2  -2 26.4187  6.4538   4
   9  -2   2 22.1300  6.2879   5
   9  -2   2 25.5408  5.8601   2
   9  -2   2 31.6797  6.7163   3
 -10   2  -2 187.257  20.820   4
 -10   2  -2 198.836  17.397   7
  10  -2   2 190.662  15.938   5
  10  -2   2 183.430  16.024   2
  10  -2   2 181.885  21.819   3
 -11   2  -2 0.73112 7.53709   4
 -11   2  -2 -3.0997  5.9306   7
  11  -2   2 -0.5185  6.0729   5
  11  -2   2 0.85940 6.51927   3
  11   1  -2 20.2138  8.0983   3
 -11  -1   2 32.2649  9.3877   4
 -11  -1   2 2.47812 7.02646   7
  10   1  -2 4.43097 5.32575   3
 -10  -1   2 7.92863 6.82002   7
 -10  -1   2 7.71155 5.53131   4
   9   1  -2 -0.0494  3.8267   3
  -9  -1   2 -2.8117  4.7455   4
  -9  -1   2 3.05993 3.65076   7
   8   1  -2 14.7986  5.4094   3
   8   1  -2 8.99326 1.73878   1
  -8  -1   2 8.42343 4.85228   4
  -8  -1   2 12.1795  4.8207   7
  -8  -1   2 11.0990  3.5573   8
   7   1  -2 2.63868 1.52931   1
   7   1  -2 4.07676 3.12329   3
  -7  -1   2 0.73898 2.01060   8
  -7  -1   2 4.28990 4.18397   4
  -7  -1   2 -3.5331  4.0044   7
   6   1  -2 3.01126 3.07832   3
   6   1  -2 1.85185 1.37369   1
   6   1  -2 0.09034 1.47772   1
  -6  -1   2 -2.2864  3.5059   7
  -6  -1   2 4.49228 2.90298   4
  -6  -1   2 -2.8506  1.2471   1
  -6  -1   2 -0.9093  2.0614   8
   5   1  -2 2394.26  112.18   1
   5   1  -2 2093.03  107.68   1
   5   1  -2 2317.81  162.82   3
  -5  -1   2 2231.37  130.95   8
  -5  -1   2 2283.30   92.23   7
  -5  -1   2 2166.02   80.14   1
   4   1  -2 5.74234 2.93893   3
   4   1  -2 4.49144 1.50682   1
   4   1  -2 8.85641 1.62987   1
  -4  -1   2 9.65957 2.67208   7
  -4  -1   2 4.43384 1.82224   1
  -4  -1   2 7.17370 1.37059   1
  -4  -1   2 8.19839 2.10838   8
   3   1  -2 1701.35   92.80   1
   3   1  -2 1865.96  102.51   3
   3   1  -2 1854.19   77.64   7
   3   1  -2 1876.52   86.43   1
  -3  -1   2 1990.06  141.54   3
  -3  -1   2 1825.10   85.44   1
  -3  -1   2 1846.80   84.01   7
  -3  -1   2 1942.37  102.05   2
  -3  -1   2 1851.61   92.46   8
  -3  -1   2 1840.40  141.93   5
  -3  -1   2 1818.97   81.24   1
   2   1  -2 5.83314 1.38937   1
   2   1  -2 8.77349 1.94250   7
   2   1  -2 7.18238 1.24276   8
   2   1  -2 8.22883 1.57911   1
   2   1  -2 8.33638 1.83381   3
  -2  -1   2 6.65878 1.38697   1
  -2  -1   2 6.63013 1.96652   7
  -2  -1   2 7.22659 1.23055   8
  -2  -1   2 8.14196 1.96667   3
  -2  -1   2 6.60587 1.40083   1
   1   1  -2 2926.54  124.08   1
   1   1  -2 3007.38  220.31   8
   1   1  -2 2650.13  132.12   1
   1   1  -2 3178.94  251.64   7
  -1  -1   2 2929.21  225.05   7
  -1  -1   2 2455.25  195.57   1
  -1  -1   2 2563.74  132.59   3
  -1   1  -2 19.9517  1.9632   5
  -1   1  -2 23.2083  2.4824   2
   1  -1   2 18.1480  1.9577   5
   1  -1   2 17.3202  1.6384   1
   1  -1   2 20.2868  1.6631   3
   1  -1   2 15.1062  2.0660   2
   1  -1   2 22.2028  1.8298   1
  -2   1  -2 26.4566  2.7078   5
  -2   1  -2 19.9926  1.2226   1
  -2   1  -2 25.0239  2.9192   3
  -2   1  -2 19.5809  2.6267   2
  -2   1  -2 23.6122  1.6504   1
  -2   1  -2 21.3476  1.7438   6
   2  -1   2 22.4043  2.4252   3
   2  -1   2 19.8000  2.2743   2
   2  -1   2 26.7491  3.0922   5
   2  -1   2 24.5394  1.9494   6
   2  -1   2 19.6462  1.5822   1
  -3   1  -2 752.479  23.096   1
  -3   1  -2 824.557  45.153   3
  -3   1  -2 787.241  50.226   5
  -3   1  -2 809.525  85.964   2
  -3   1  -2 799.266  44.904   1
  -3   1  -2 754.161  43.917   6
   3  -1   2 715.386  33.879   1
   3  -1   2 774.367  55.422   3
   3  -1   2 775.838  51.594   2
   3  -1   2 760.067  31.360   6
   3  -1   2 776.289  39.763   5
  -4   1  -2 346.636  13.127   1
  -4   1  -2 304.210  14.121   1
  -4   1  -2 327.086  20.625   7
  -4   1  -2 327.904  17.006   6
   4  -1   2 345.789  16.880   5
   4  -1   2 362.748  18.200   3
   4  -1   2 310.780  15.545   1
   4  -1   2 350.479  16.300   2
  -5   1  -2 3.98814 1.66488   6
  -5   1  -2 0.20767 2.06964   7
   5  -1   2 2.63364 2.70860   5
   5  -1   2 5.83077 2.98216   3
   5  -1   2 3.93408 2.31435   2
  -6   1  -2 21.5380  3.9803   7
  -6   1  -2 15.5062  2.3655   6
  -6   1  -2 22.7408  3.4334   4
   6  -1   2 29.1783  3.8518   3
   6  -1   2 24.8766  4.1427   5
   6  -1   2 22.1938  3.9108   2
  -7   1  -2 7.14068 3.03465   4
  -7   1  -2 8.67726 3.87719   7
  -7   1  -2 1.04942 1.99162   6
   7  -1   2 3.68501 3.44555   5
   7  -1   2 4.51565 3.23487   3
   7  -1   2 8.70093 3.56025   2
  -8   1  -2 0.64348 3.44429   4
  -8   1  -2 1.88517 2.51568   6
  -8   1  -2 1.26214 4.17044   7
   8  -1   2 4.96908 4.14500   2
   8  -1   2 1.00325 3.23548   5
   8  -1   2 -2.7364  4.2587   3
  -9   1  -2 168.900  15.787   7
  -9   1  -2 145.044  13.019   4
   9  -1   2 152.139  13.908   5
   9  -1   2 161.455  12.844   2
   9  -1   2 144.864  11.260   3
 -10   1  -2 17.4577  6.6044   4
 -10   1  -2 24.6088  6.0924   7
  10  -1   2 173.125  95.945   2
  10  -1   2 38.2213  7.4969   3
  10  -1   2 28.6368  6.5326   5
 -11   1  -2 93.8360 13.5401   4
 -11   1  -2 95.6195 12.5241   7
  11  -1   2 121.100  14.189   3
  11   0  -2 36.3279  8.4421   3
 -11   0   2 28.7107  8.3283   4
 -11   0   2 11.7351  7.5135   7
  10   0  -2 50.1120  8.7006   3
 -10   0   2 42.4163  8.6744   7
   9   0  -2 61.9372  8.7891   3
  -9   0   2 52.9918  7.8644   4
  -9   0   2 50.1182  9.1649   7
   8   0  -2 69.7067  8.6140   3
   8   0  -2 53.8801  4.0532   1
  -8   0   2 69.1132  6.2957   8
  -8   0   2 64.8807  7.2807   7
  -8   0   2 59.1185  7.2401   6
  -8   0   2 76.0167  7.7344   4
   7   0  -2 146.974   9.858   1
   7   0  -2 202.136  15.775   3
   7   0  -2 171.082   9.746   1
  -7   0   2 184.407  13.575   7
  -7   0   2 182.705  12.063   8
   6   0  -2 481.859  24.279   1
   6   0  -2 501.398  25.483   3
  -6   0   2 497.885  23.808   1
  -6   0   2 474.161  20.784   8
  -6   0   2 490.237  27.785   7
   5   0  -2 9.99662 1.79670   1
   5   0  -2 13.3422  1.9946   1
   5   0  -2 11.9802  4.0493   3
  -5   0   2 8.78524 2.35286   8
  -5   0   2 14.8881  1.8124   1
  -5   0   2 8.74379 3.22204   7
   4   0  -2 994.891  43.292   1
   4   0  -2 878.822  44.355   1
   4   0  -2 942.564  51.440   3
  -4   0   2 960.189  37.777   1
  -4   0   2 904.618  45.533   8
  -4   0   2 913.584  72.117   1
  -4   0   2 949.875  52.630   7
   3   0  -2 11.1456  2.1250   7
   3   0  -2 9.26870 1.69057   1
   3   0  -2 8.89490 1.35786   1
   3   0  -2 14.3760  2.4743   3
  -3   0   2 6.10671 1.91878   3
  -3   0   2 9.69151 1.55539   1
  -3   0   2 9.77216 2.12714   5
  -3   0   2 13.0845  1.5552   1
  -3   0   2 9.58089 3.03983   7
  -3   0   2 8.23581 1.52325   8
  -3   0   2 4.56099 1.82287   2
   2   0  -2 1485.69  111.01   3
   2   0  -2 1567.26   91.30   7
   2   0  -2 1505.85   95.10   1
   2   0  -2 1584.79   60.13   1
  -2   0   2 1590.84   78.54   5
  -2   0   2 1551.94   73.06   3
  -2   0   2 1596.23  115.09   2
  -2   0   2 1581.24  109.60   1
  -2   0   2 1484.73  100.84   7
  -2   0   2 1541.21   77.65   8
  -2   0   2 1579.26   68.75   1
   1   0  -2 -0.6796  1.0767   1
   1   0  -2 0.61828 0.89311   7
   1   0  -2 0.44245 0.93615   8
   1   0  -2 0.20235 1.09764   1
   1   0  -2 -0.9989  0.8784   3
  -1   0   2 -3.0940  0.7323   1
  -1   0   2 -1.8472  0.7207   8
  -1   0   2 1.10969 1.11063   7
  -2   0  -2 -0.3122  0.9819   6
  -2   0  -2 -0.0176  1.0185   3
  -2   0  -2 -0.4543  0.3433   1
  -2   0  -2 0.05959 1.27289   2
  -2   0  -2 -0.1648  0.2357   1
  -2   0  -2 0.70823 1.02022   5
  -2   0  -2 -0.8155  0.9536   4
   2   0   2 -0.4310  1.1320   2
   2   0   2 0.24453 1.36695   3
   2   0   2 1.85036 1.17766   6
   2   0   2 3.43628 1.58416   5
  -3   0  -2 71.7407  7.4007   3
  -3   0  -2 64.0697  5.7337   6
  -3   0  -2 73.2638  5.5699   2
  -3   0  -2 71.2165  5.1512   7
  -3   0  -2 67.6646  4.6463   4
  -3   0  -2 66.7384  5.1741   5
   3   0   2 74.4439  5.3180   3
   3   0   2 67.8017  5.5916   2
   3   0   2 65.8129  4.4927   5
  -4   0  -2 199.690  14.833   6
  -4   0  -2 218.077  11.848   4
  -4   0  -2 214.198  10.945   7
   4   0   2 208.606  12.356   2
   4   0   2 202.260  15.811   5
   4   0   2 205.333  12.877   3
  -5   0  -2 75.8057  6.2215   7
  -5   0  -2 55.5966  5.9591   6
  -5   0  -2 65.8384  5.2477   4
   5   0   2 78.3346  6.2032   2
   5   0   2 72.3194  7.4851   5
   5   0   2 67.3920  5.8383   3
  -6   0  -2 153.681   9.626   7
  -6   0  -2 131.488  13.151   6
  -6   0  -2 145.725   9.195   4
   6   0   2 138.423   8.018   2
   6   0   2 135.502   7.967   3
   6   0   2 134.560   7.186   5
  -7   0  -2 0.55313 3.15402   4
  -7   0  -2 3.20246 3.21802   7
  -7   0  -2 2.79716 2.50319   6
   7   0   2 -1.6813  2.3388   5
   7   0   2 -0.1958  2.7418   2
   7   0   2 -0.8533  3.3404   3
  -8   0  -2 287.857  20.457   4
  -8   0  -2 302.884  27.947   6
  -8   0  -2 317.494  23.291   7
   8   0   2 314.961  19.900   3
   8   0   2 278.986  17.626   2
   8   0   2 285.106  18.779   5
  -9   0  -2 86.1246  9.7260   7
  -9   0  -2 105.653  10.155   4
   9   0   2 114.586  13.668   3
   9   0   2 103.793  10.057   5
   9   0   2 89.6895  9.7708   2
 -10   0  -2 107.003  12.056   4
 -10   0  -2 110.814   9.492   7
  10   0   2 105.912  11.985   2
  10   0   2 103.667  13.136   3
 -11   0  -2 31.0983  6.8658   4
 -11   0  -2 42.6556 10.0729   7
  11   0   2 22.9149  7.8881   3
  11  -1  -2 131.937  17.003   3
 -11   1   2 140.555  20.718   4
 -11   1   2 151.896  16.832   7
  10  -1  -2 323.814  27.258   3
 -10   1   2 305.997  31.620   7
 -10   1   2 339.645  26.633   4
   9  -1  -2 13.1044  5.7720   3
  -9   1   2 9.76266 5.67320   7
  -9   1   2 13.2446  4.9195   4
  -9   1   2 12.5418  4.0969   8
   8  -1  -2 530.393  34.234   1
   8  -1  -2 571.653  48.086   3
  -8   1   2 641.231  39.976   7
  -8   1   2 568.995  48.455   8
   7  -1  -2 175.692  11.702   1
   7  -1  -2 198.261  14.635   1
   7  -1  -2 191.756  14.186   3
  -7   1   2 181.409  14.569   6
  -7   1   2 189.334  14.437   7
   6  -1  -2 35.4164  4.8189   5
   6  -1  -2 44.8709  3.1241   1
   6  -1  -2 46.3467  5.6066   3
  -6   1   2 43.0349  2.8712   1
  -6   1   2 49.5904  5.3980   7
   5  -1  -2 254.304  12.692   3
   5  -1  -2 255.085  13.964   2
   5  -1  -2 243.772  14.033   1
   5  -1  -2 234.302  17.552   5
   5  -1  -2 268.528  13.735   1
  -5   1   2 275.741  10.496   1
  -5   1   2 236.672  11.627   7
   4  -1  -2 34.4111  3.4745   2
   4  -1  -2 35.2787  4.1605   3
   4  -1  -2 36.4381  3.3481   5
   4  -1  -2 36.6848  2.7522   1
   4  -1  -2 31.8253  2.3647   1
  -4   1   2 33.2365  3.8891   7
  -4   1   2 30.4453  2.6344   1
  -4   1   2 28.9615  2.4369   1
   3  -1  -2 547.438  31.216   5
   3  -1  -2 544.483  29.648   7
   3  -1  -2 546.631  26.702   1
   3  -1  -2 568.781  21.753   1
   3  -1  -2 572.770  42.560   3
   3  -1  -2 550.593  36.253   2
  -3   1   2 541.245  33.035   7
  -3   1   2 551.149  58.591   2
  -3   1   2 528.420  20.927   1
  -3   1   2 527.683  75.649   5
  -3   1   2 526.212  28.854   1
  -3   1   2 576.172  24.713   3
   2  -1  -2 45.7224  2.7361   1
   2  -1  -2 51.2335  3.7320   7
   2  -1  -2 38.3767  3.0029   1
   2  -1  -2 41.4071  4.5606   5
   2  -1  -2 43.8817  3.7101   3
  -2   1   2 37.1477  2.6826   1
  -2   1   2 41.1245  3.6170   5
  -2   1   2 42.1700  4.0424   7
  -2   1   2 39.4227  3.1749   1
  -2   1   2 43.0765  2.9147   2
  -2   1   2 41.1008  3.4786   4
   1  -1  -2 -0.1442  1.2398   4
   1  -1  -2 -3.2369  0.8825   1
   1  -1  -2 -3.7258  0.7789   7
   1  -1  -2 -2.8139  0.9900   1
  -1   1   2 -4.4371  0.7197   1
  -1   1   2 -3.8606  0.8760   4
  -1   1   2 -2.2699  1.2329   5
  -1   1   2 -4.5786  0.6227   1
  -1   1   2 -1.2958  1.1711   7
  -2  -1  -2 51.4805  2.4191   1
  -2  -1  -2 58.3037  4.6372   4
  -2  -1  -2 56.0931  5.6583   2
  -2  -1  -2 52.3963  3.7651   6
  -2  -1  -2 54.4678  3.1339   1
  -2  -1  -2 53.2426  3.5433   7
  -2  -1  -2 48.6023  3.4574   5
  -2  -1  -2 58.4505  4.6524   3
   2   1   2 52.7228  3.6789   5
   2   1   2 51.8569  2.7486   1
   2   1   2 52.8873  4.2780   2
   2   1   2 55.6446  4.0476   4
   2   1   2 54.2916  3.2834   7
   2   1   2 66.4057  4.3520   3
  -3  -1  -2 71.6440  4.9908   6
  -3  -1  -2 66.4332  3.6385   1
  -3  -1  -2 83.7664  5.1377   2
  -3  -1  -2 76.2400  4.3632   1
  -3  -1  -2 68.6963  7.3021   5
  -3  -1  -2 64.0301  9.5439   3
  -3  -1  -2 78.7780  4.7112   7
  -3  -1  -2 71.0010  4.2778   4
   3   1   2 65.3754  5.5640   3
   3   1   2 65.9523  2.7068   1
   3   1   2 59.9683  3.5100   1
   3   1   2 77.8222  4.8668   7
   3   1   2 64.5488  4.4535   5
   3   1   2 73.6898  3.9618   2
  -4  -1  -2 170.650  29.615   5
  -4  -1  -2 213.330   9.465   7
  -4  -1  -2 180.770  11.613   6
  -4  -1  -2 189.746   8.942   4
  -4  -1  -2 168.603   8.470   1
   4   1   2 192.996  11.536   3
   4   1   2 199.612  11.306   5
   4   1   2 236.932   9.899   1
   4   1   2 196.707  13.796   2
  -5  -1  -2 521.161  19.086   7
  -5  -1  -2 524.393  35.449   6
  -5  -1  -2 535.629  25.163   4
   5   1   2 542.381  26.505   2
   5   1   2 545.032  23.441   3
   5   1   2 536.974  26.973   5
  -6  -1  -2 61.8969  4.5138   7
  -6  -1  -2 58.5958  5.2161   4
  -6  -1  -2 59.2638  5.3334   6
   6   1   2 58.5270  5.6408   3
   6   1   2 56.0344  4.6474   2
   6   1   2 65.1984  5.7334   5
  -7  -1  -2 1.34068 3.07387   4
  -7  -1  -2 0.55895 2.26667   6
  -7  -1  -2 5.13177 3.23992   7
   7   1   2 0.13165 2.78012   5
   7   1   2 4.93482 3.90360   2
   7   1   2 1.85335 4.23361   3
  -8  -1  -2 16.4152  4.8994   4
  -8  -1  -2 19.9534  3.7363   8
  -8  -1  -2 15.1968  5.6644   7
  -8  -1  -2 18.6240  4.3804   6
   8   1   2 12.8755  4.4492   2
   8   1   2 22.9677  3.7208   5
   8   1   2 13.9448  4.5830   3
  -9  -1  -2 -0.5188  4.6568   4
  -9  -1  -2 -1.1009  5.5704   6
  -9  -1  -2 -1.2739  4.5272   7
   9   1   2 0.22091 5.82908   3
   9   1   2 2.46859 5.23465   2
 -10  -1  -2 127.287  13.268   4
 -10  -1  -2 147.777  12.075   7
  10   1   2 124.514  15.118   3
 -11  -1  -2 167.716  21.932   7
 -11  -1  -2 188.129  20.134   4
  11   1   2 177.074  26.938   3
  11  -2  -2 61.7962  8.8586   3
 -11   2   2 81.9998  9.6081   7
  10  -2  -2 3.74160 5.72702   3
 -10   2   2 -0.3279  5.9456   7
 -10   2   2 0.84150 4.59075   4
   9  -2  -2 8.21923 4.79936   3
  -9   2   2 1.78439 3.64096   8
  -9   2   2 6.67495 5.06714   7
  -9   2   2 5.15370 4.85190   4
   8  -2  -2 149.228  12.278   1
   8  -2  -2 180.194  16.406   3
  -8   2   2 187.912  16.155   7
   7  -2  -2 123.267   7.742   5
   7  -2  -2 134.579   9.725   3
   7  -2  -2 131.584   9.357   1
  -7   2   2 128.551   7.943   6
  -7   2   2 133.286   9.405   7
   6  -2  -2 106.525   8.085   1
   6  -2  -2 93.7256  9.9886   2
   6  -2  -2 110.632   7.431   3
   6  -2  -2 94.5421  7.5182   5
  -6   2   2 106.346  10.262   6
  -6   2   2 111.163   7.516   1
  -6   2   2 104.115   7.897   7
   5  -2  -2 9.07101 1.85210   1
   5  -2  -2 12.4705  1.9140   1
   5  -2  -2 9.90644 2.97464   2
   5  -2  -2 8.52086 2.86869   5
   5  -2  -2 9.62634 2.88489   3
  -5   2   2 8.02410 1.87252   1
  -5   2   2 9.33329 1.37843   6
  -5   2   2 5.48295 2.56862   7
   4  -2  -2 4.03685 1.66055   1
   4  -2  -2 0.76889 2.33777   3
   4  -2  -2 1.33779 2.09875   5
   4  -2  -2 1.82020 1.73081   1
   4  -2  -2 1.97265 1.85475   2
  -4   2   2 -2.1402  1.9955   7
  -4   2   2 2.50051 0.87371   6
  -4   2   2 1.63529 1.48270   1
   3  -2  -2 7.71836 1.70810   1
   3  -2  -2 8.92760 1.72558   1
   3  -2  -2 11.3553  2.5294   3
   3  -2  -2 3.38227 2.23279   5
   3  -2  -2 5.96868 2.32419   2
  -3   2   2 6.54282 0.80444   6
  -3   2   2 9.56149 2.24094   7
  -3   2   2 2.69556 1.38245   1
  -3   2   2 3.43041 1.76909   4
  -3   2   2 1.72220 1.92671   2
  -3   2   2 6.53185 1.58472   1
   2  -2  -2 5533.28  327.18   5
   2  -2  -2 5289.35  248.46   1
   2  -2  -2 5747.23  302.99   2
  -2   2   2 6219.92  332.74   2
   1  -2  -2 21.1391  1.8462   1
   1  -2  -2 22.6121  2.8506   4
   1  -2  -2 15.5113  1.2778   6
   1  -2  -2 23.9298  2.2947   5
   1  -2  -2 21.1744  2.1694   1
  -1   2   2 20.6888  2.1227   5
  -1   2   2 23.5160  2.2548   4
  -1   2   2 18.6194  1.8075   1
  -1   2   2 19.1792  1.8525   1
   0   2   2 2761.80  391.61   4
  -1  -2  -2 35.0555  2.5240   4
  -1  -2  -2 36.4456  2.3003   1
   1   2   2 35.5262  2.4460   1
   1   2   2 40.4959  3.0097   4
   1   2   2 31.7007  2.8939   2
   1   2   2 40.7976  3.0567   1
  -2  -2  -2 51.3355  3.6432   1
  -2  -2  -2 52.9134  3.8511   5
  -2  -2  -2 61.4307  4.9305   3
  -2  -2  -2 52.2673  5.3419   4
  -2  -2  -2 50.6642  2.9012   1
  -2  -2  -2 52.6068  3.5173   2
  -2  -2  -2 58.2848  4.1873   7
   2   2   2 41.6198  3.1136   2
   2   2   2 49.4356  4.0676   4
   2   2   2 59.5536  3.9097   7
   2   2   2 50.8303  3.3523   1
   2   2   2 54.4924  3.4665   1
   2   2   2 57.0974  3.6198   5
   2   2   2 56.6533  4.9162   3
  -3  -2  -2 301.215  26.869   7
  -3  -2  -2 280.640  16.309   2
  -3  -2  -2 319.173  20.605   8
  -3  -2  -2 311.476  17.959   5
  -3  -2  -2 281.105  15.014   1
  -3  -2  -2 287.690  19.472   4
  -3  -2  -2 293.542  14.854   1
  -3  -2  -2 282.167  17.576   3
   3   2   2 315.871  20.733   1
   3   2   2 302.666  17.697   7
   3   2   2 296.566  16.740   5
   3   2   2 273.629  10.613   1
   3   2   2 303.628  17.764   3
   3   2   2 303.381  13.596   4
   3   2   2 289.401  18.407   2
  -4  -2  -2 3525.75  211.08   5
  -4  -2  -2 3390.38  163.37   4
  -4  -2  -2 3693.03  175.26   1
  -4  -2  -2 3705.34  197.83   8
  -4  -2  -2 3628.59  218.96   7
   4   2   2 3665.68  176.88   7
   4   2   2 3493.14  195.90   2
   4   2   2 3523.57  215.88   5
   4   2   2 3277.03  113.93   1
   4   2   2 3417.96  219.46   3
  -5  -2  -2 969.425  45.373   8
  -5  -2  -2 982.455  43.781   4
  -5  -2  -2 940.497  50.097   1
  -5  -2  -2 920.261  46.801   7
  -5  -2  -2 865.242  54.078   1
   5   2   2 932.458  53.934   3
   5   2   2 881.508  39.442   2
   5   2   2 1034.36   43.87   1
   5   2   2 940.229  46.081   5
   5   2   2 840.607  33.555   1
  -6  -2  -2 238.253  15.077   6
  -6  -2  -2 251.261  12.850   8
  -6  -2  -2 238.129  17.431   1
  -6  -2  -2 249.451  14.770   4
  -6  -2  -2 253.304  13.351   7
   6   2   2 224.174   8.493   1
   6   2   2 238.378  16.554   5
   6   2   2 244.129  12.926   2
   6   2   2 259.101  13.922   1
   6   2   2 266.256  13.045   3
  -7  -2  -2 2.47471 2.03406   8
  -7  -2  -2 -1.0300  2.5577   6
  -7  -2  -2 3.65364 3.32875   7
  -7  -2  -2 -2.5663  3.0127   4
   7   2   2 0.77281 3.13592   3
   7   2   2 3.58882 3.53946   2
   7   2   2 4.48032 3.86184   5
  -8  -2  -2 25.1486  4.0431   6
  -8  -2  -2 18.5292  5.4365   7
  -8  -2  -2 26.9222  5.3290   4
   8   2   2 27.1181  5.2376   3
   8   2   2 20.9739  4.4750   2
  -9  -2  -2 -2.2564  4.0218   6
  -9  -2  -2 7.45699 5.59408   4
  -9  -2  -2 -1.1394  4.7324   7
   9   2   2 3.03840 3.91436   2
   9   2   2 -1.1187  4.4710   3
 -10  -2  -2 56.4739 10.7741   7
 -10  -2  -2 63.3407  9.7700   4
  10   2   2  73.890 108.277   3
 -11  -2  -2 237.628  27.006   7
 -11  -2  -2 239.612  27.335   4
  11   2   2 245.653  20.106   3
  11  -3  -2 68.5090 10.1411   3
 -11   3   2 48.2695 12.6938   7
 -11   3   2 41.4982  9.9003   4
  10  -3  -2 66.3139  9.8223   3
 -10   3   2 57.8985  9.2201   7
 -10   3   2 61.2360  8.9451   4
   9  -3  -2 54.4988  8.0523   3
  -9   3   2 77.1235  9.5714   7
   8  -3  -2 307.899  21.115   1
   8  -3  -2 334.290  22.624   5
   8  -3  -2 331.429  22.395   3
  -8   3   2 345.495  24.404   7
   7  -3  -2 49.6994  7.5886   5
   7  -3  -2 61.1951  4.6113   1
   7  -3  -2 68.2109  6.7580   3
  -7   3   2 71.9050  8.0571   7
   6  -3  -2 20.0558  4.7975   2
   6  -3  -2 29.0132  4.8243   3
   6  -3  -2 26.7910  2.6300   1
   6  -3  -2 18.9492  4.0127   5
   6  -3  -2 28.6250  3.4568   1
  -6   3   2 20.9686  2.5696   1
  -6   3   2 23.9436  1.8238   6
  -6   3   2 29.9788  4.7853   7
   5  -3  -2 106.029   4.797   1
   5  -3  -2 92.6118  8.2083   5
   5  -3  -2 80.2976  5.2559   1
   5  -3  -2 101.896   6.610   3
   5  -3  -2 85.1845  5.6988   2
  -5   3   2 84.9375  6.8990   7
  -5   3   2 90.5509  5.2202   1
   4  -3  -2 41.0835  4.8317   5
   4  -3  -2 43.3916  3.5658   1
   4  -3  -2 35.0831  2.6334   1
   4  -3  -2 33.0487  3.6764   3
   4  -3  -2 47.0168  3.4459   2
  -4   3   2 41.7175  3.6947   1
  -4   3   2 47.9655  4.4895   7
   3  -3  -2 931.080  55.609   3
   3  -3  -2 916.515  35.226   1
   3  -3  -2 859.273  41.760   5
   3  -3  -2 886.132  40.779   2
   3  -3  -2 879.768  48.135   4
   3  -3  -2 863.357  46.115   1
  -3   3   2 877.507  48.118   1
  -3   3   2 986.860  48.205   4
  -3   3   2 889.041  83.145   2
  -3   3   2 849.091  59.699   1
   2  -3  -2 32.5280  3.3457   5
   2  -3  -2 33.7066  3.1412   2
   2  -3  -2 34.2422  2.4216   1
   2  -3  -2 37.8751  4.2102   4
   2  -3  -2 31.8520  2.5982   1
  -2   3   2 35.4500  3.5012   4
  -2   3   2 25.2100  2.8379   5
  -2   3   2 31.8568  2.9674   1
  -2   3   2 36.1742  3.9802   2
  -2   3   2 30.9558  2.6239   1
   1  -3  -2 1719.46  168.92   5
   1  -3  -2 2169.40  507.09   4
   0  -3  -2 -0.7994  1.6501   1
   0  -3  -2 -2.0925  1.5408   4
   0  -3  -2 -1.7997  1.5311   1
   0  -3  -2 -2.2898  0.8610   5
   0   3   2 -2.8810  1.3599   1
   0   3   2 -3.2498  1.4579   1
   0   3   2 -3.1645  0.8447   5
   0   3   2 -4.1568  1.3517   4
  -1  -3  -2 162.243   8.038   1
  -1  -3  -2 149.732   9.448   2
  -1  -3  -2 163.358  13.468   4
  -1  -3  -2 159.532   8.302   1
   1   3   2 163.810  14.545   4
   1   3   2 161.152   8.830   1
   1   3   2 139.709   7.925   2
   1   3   2 170.991   9.740   1
  -2  -3  -2 39.7433  3.1725   3
  -2  -3  -2 47.2841  3.6345   2
  -2  -3  -2 41.6769  3.2203   5
  -2  -3  -2 40.9333  4.1359   4
  -2  -3  -2 40.6390  3.0691   1
  -2  -3  -2 40.3170  2.9058   1
   2   3   2 46.8522  3.6556   4
   2   3   2 37.6910  2.5929   1
   2   3   2 43.6272  2.7025   1
   2   3   2 37.1901  2.7304   2
   2   3   2 45.2886  4.1915   3
   2   3   2 43.5079  3.8823   7
  -3  -3  -2 16.1823  2.8865   4
  -3  -3  -2 17.6665  2.1908   2
  -3  -3  -2 23.1352  2.4093   5
  -3  -3  -2 15.8937  1.8840   1
  -3  -3  -2 19.5944  1.8910   1
  -3  -3  -2 21.1748  2.3474   7
   3   3   2 21.9729  2.8395   3
   3   3   2 18.3333  1.8788   1
   3   3   2 19.8498  2.6033   7
   3   3   2 14.0491  1.8995   1
   3   3   2 21.2847  2.3763   2
  -4  -3  -2 637.829  65.002   1
  -4  -3  -2 663.848  37.811   5
  -4  -3  -2 699.581  39.096   7
  -4  -3  -2 656.825  29.309   1
  -4  -3  -2 687.939  34.134   4
   4   3   2 712.996  32.938   1
   4   3   2 614.641  25.305   1
   4   3   2 645.960  29.296   2
   4   3   2 703.490  52.650   7
   4   3   2 652.163  36.093   3
  -5  -3  -2 846.257  34.317   4
  -5  -3  -2 1090.96   56.04   8
  -5  -3  -2 970.414  44.395   7
  -5  -3  -2 949.583  45.016   1
   5   3   2 929.165  70.370   3
   5   3   2 911.470  36.106   2
   5   3   2 1002.19   63.86   1
   5   3   2 872.040  35.878   1
  -6  -3  -2 148.876  10.001   1
  -6  -3  -2 157.402   9.967   4
  -6  -3  -2 171.177  10.370   8
  -6  -3  -2 162.300  10.055   7
   6   3   2 173.347   8.639   2
   6   3   2 146.657   7.636   1
   6   3   2 163.377  14.490   3
  -7  -3  -2 256.218  14.808   4
  -7  -3  -2 275.959  20.662   8
  -7  -3  -2 282.601  20.948   7
   7   3   2 277.590  24.580   3
   7   3   2 255.191  13.904   1
   7   3   2 287.055  20.742   1
   7   3   2 265.115  15.278   2
  -8  -3  -2 20.8865  4.3570   6
  -8  -3  -2 47.7728  6.3362   4
  -8  -3  -2 37.9409  5.7764   7
   8   3   2 31.0148  5.3990   3
   8   3   2 30.2000  5.8027   2
  -9  -3  -2 62.4191 10.1599   4
  -9  -3  -2 60.3192  7.3415   6
  -9  -3  -2 50.8766  8.0495   7
   9   3   2 54.4568  7.9323   3
 -10  -3  -2 -1.7415  5.5829   4
 -10  -3  -2 3.96924 6.15247   7
  10   3   2 5.63677 7.84284   3
 -11  -3  -2 116.090  18.907   7
 -11  -3  -2 138.047  18.565   4
  11   3   2 125.966  13.532   3
  11  -4  -2 3.72450 8.31464   3
 -11   4   2 7.65820 7.08243   7
 -11   4   2 7.11362 6.51707   4
  10  -4  -2 48.3697  8.8999   3
 -10   4   2 46.6713  8.4975   7
   9  -4  -2 192.531  13.579   3
   9  -4  -2 176.186  14.693   5
  -9   4   2 211.335  19.213   7
   8  -4  -2 202.463  12.600   3
   8  -4  -2 186.530  19.494   1
   8  -4  -2 212.323  15.168   5
  -8   4   2 216.061  17.298   7
   7  -4  -2 145.927  10.803   3
   7  -4  -2 141.577   9.798   1
   7  -4  -2 131.820  12.589   5
  -7   4   2 145.248  13.049   7
   6  -4  -2 144.845   9.385   3
   6  -4  -2 143.720  10.747   1
   6  -4  -2 140.664   9.262   5
   6  -4  -2 136.478   8.427   2
   6  -4  -2 133.920   8.843   1
  -6   4   2 124.898   6.912   1
  -6   4   2 134.655   9.106   7
   5  -4  -2 1.82833 2.73087   3
   5  -4  -2 1.42181 2.08687   1
   5  -4  -2 5.70617 2.98055   5
   5  -4  -2 4.64022 2.07638   1
   5  -4  -2 3.86367 3.13212   2
  -5   4   2 2.59096 2.61401   7
  -5   4   2 2.74430 1.90664   1
   4  -4  -2 9.35421 1.94984   1
   4  -4  -2 6.47072 2.64852   5
   4  -4  -2 5.90379 2.38235   2
   4  -4  -2 9.15111 2.47855   3
   4  -4  -2 4.00523 1.96772   1
  -4   4   2 9.33995 2.31675   1
   3  -4  -2 0.61378 2.07679   2
   3  -4  -2 1.00283 1.50377   1
   3  -4  -2 -2.5767  2.1599   4
   3  -4  -2 2.57561 2.64913   3
   3  -4  -2 2.80540 1.90736   1
   3  -4  -2 -2.1662  1.9656   5
  -3   4   2 -1.1281  1.6062   1
   2  -4  -2 28.7867  2.3043   1
   2  -4  -2 26.6907  2.7369   1
   2  -4  -2 18.4740  2.6452   5
   2  -4  -2 26.8359  2.8590   4
   2  -4  -2 24.1811  2.9167   2
  -2   4   2 26.6512  2.8027   4
  -2   4   2 25.6115  3.1621   2
  -2   4   2 22.7407  3.1209   5
  -2   4   2 27.3734  2.6307   1
   1  -4  -2 3.44571 2.12520   4
   1  -4  -2 2.90072 1.27507   5
   1  -4  -2 6.25857 1.70970   1
  -1   4   2 1.56700 1.19511   2
  -1   4   2 3.08740 1.33154   5
  -1   4   2 1.58171 1.54198   4
  -1   4   2 2.59632 1.23328   1
  -1   4   2 4.00296 1.76337   1
   0  -4  -2 23.0198  3.2020   1
   0  -4  -2 18.7308  1.6346   5
   0  -4  -2 18.7101  2.5624   1
   0   4   2 20.5136  2.0900   5
   0   4   2 19.7358  3.0882   1
   0   4   2 23.2431  3.1086   4
   0   4   2 18.5264  1.1875   2
  -1  -4  -2 65.4740  3.4882   2
  -1  -4  -2 83.3668  7.6942   4
  -1  -4  -2 80.1344  4.6051   1
  -1  -4  -2 76.6657  4.5884   1
  -1  -4  -2 68.9637  3.3041   5
   1   4   2 73.7249  4.7779   1
   1   4   2 72.1918  4.7356   4
   1   4   2 76.1183  4.3966   1
  -2  -4  -2 1220.34   52.96   1
  -2  -4  -2 1290.11  119.96   4
  -2  -4  -2 1114.93   65.77   5
  -2  -4  -2 1278.61  120.24   3
  -2  -4  -2 1153.55   58.02   2
  -2  -4  -2 1215.54   47.25   1
   2   4   2 1388.62  104.76   7
   2   4   2 1220.61   95.81   4
   2   4   2 1081.43   54.92   2
   2   4   2 1274.53   57.15   1
   2   4   2 1189.58   60.98   1
  -3  -4  -2 179.597  12.810   5
  -3  -4  -2 198.175   9.985   4
  -3  -4  -2 184.647  13.106   2
  -3  -4  -2 191.695  10.065   1
   3   4   2 198.967   9.015   2
   3   4   2 196.235   6.492   1
   3   4   2 187.493  13.863   1
   3   4   2 237.667  11.533   8
   3   4   2 217.093  15.607   3
   3   4   2 218.231  15.042   7
  -4  -4  -2 121.592  10.122   7
  -4  -4  -2 119.464   6.480   1
  -4  -4  -2 103.916   7.655   4
  -4  -4  -2 107.272   8.394   5
   4   4   2 109.653   5.904   1
   4   4   2 106.708   7.742   3
   4   4   2 124.121   6.003   2
   4   4   2 117.343   7.250   1
  -5  -4  -2 115.473  11.653   4
  -5  -4  -2 103.252   7.057   1
  -5  -4  -2 118.396   9.346   7
   5   4   2 107.584   8.382   3
   5   4   2 106.221   5.202   1
   5   4   2 109.280   7.146   1
   5   4   2 114.916   7.561   2
  -6  -4  -2 203.628  13.328   4
  -6  -4  -2 192.843  12.897   7
  -6  -4  -2 203.345  11.151   1
   6   4   2 203.069  11.154   1
   6   4   2 208.730  10.907   3
   6   4   2 205.415  11.644   2
   6   4   2 211.272  16.314   1
  -7  -4  -2 29.1799  5.4751   7
  -7  -4  -2 19.8546  4.5171   4
   7   4   2 30.9184  5.1924   3
   7   4   2 22.4514  3.9147   2
   7   4   2 23.5404  2.6909   1
  -8  -4  -2 59.2763  8.2473   4
  -8  -4  -2 44.2207  6.3792   6
  -8  -4  -2 43.5212  6.1891   7
   8   4   2 44.6201  3.8140   1
   8   4   2 40.8824  6.2855   3
  -9  -4  -2 16.3431  5.7479   6
  -9  -4  -2 34.7038  9.4519   4
  -9  -4  -2 12.3836  5.9176   7
   9   4   2 18.4673  5.0024   3
 -10  -4  -2 259.474  25.011   4
 -10  -4  -2 208.767  23.676   6
 -10  -4  -2 259.813  26.384   7
  10   4   2 268.965  20.729   3
 -11  -4  -2 67.3758 11.9318   7
 -11  -4  -2 87.3284 14.3723   4
  11   4   2 89.6848 12.1839   3
  11  -5  -2 -2.3734  6.6225   3
 -11   5   2 -2.1559  7.4230   7
 -11   5   2 -5.3765  5.5654   4
  10  -5  -2 216.372  28.108   3
 -10   5   2 254.205  17.518   7
   9  -5  -2 176.694  19.282   5
   9  -5  -2 173.693  13.544   3
  -9   5   2 175.310  16.631   7
   8  -5  -2 60.1134  7.1579   1
   8  -5  -2 70.8009  9.2212   3
   8  -5  -2 81.2774  9.1802   5
  -8   5   2 78.0082  9.5497   7
   7  -5  -2 189.898  14.096   3
   7  -5  -2 197.535  17.792   1
   7  -5  -2 235.487  14.645   5
   7  -5  -2 204.942  14.732   2
  -7   5   2 214.254  12.548   7
   6  -5  -2 2.91909 3.25579   2
   6  -5  -2 11.2050  4.9405   3
   6  -5  -2 17.6830  3.7335   5
   6  -5  -2 8.97362 2.62851   1
  -6   5   2 12.5429  4.1229   7
   5  -5  -2 253.669  16.715   3
   5  -5  -2 246.739  15.427   2
   5  -5  -2 243.817  12.189   5
   5  -5  -2 228.606  12.406   1
   5  -5  -2 247.469  16.091   1
  -5   5   2 258.994  14.131   1
   4  -5  -2 62.4283  4.6453   1
   4  -5  -2 74.7664  7.2629   3
   4  -5  -2 85.1711  7.1958   5
   4  -5  -2 70.2302  6.4312   4
   4  -5  -2 64.6213  5.6387   1
   4  -5  -2 70.7837  4.2146   2
  -4   5   2 62.8763  4.1276   1
   3  -5  -2 559.435  26.359   1
   3  -5  -2 627.311  31.455   5
   3  -5  -2 548.055  33.200   1
   3  -5  -2 599.090  47.348   4
   3  -5  -2 570.519  35.216   2
  -3   5   2 622.254  26.859   1
   2  -5  -2 85.9770  7.7719   4
   2  -5  -2 90.0653  4.8771   2
   2  -5  -2 79.3588  5.1563   1
   2  -5  -2 81.0538  6.0021   1
   2  -5  -2 82.0547  6.3740   5
  -2   5   2 95.7801  5.2124   1
  -2   5   2 89.3596  7.0674   4
  -2   5   2 105.533   5.767   2
   1  -5  -2 4035.33  212.75   2
   1  -5  -2 3823.39  190.48   1
   1  -5  -2 3389.42  190.97   1
   1  -5  -2 4021.52  365.24   4
   1  -5  -2 3816.86  158.55   5
  -1   5   2 3842.39  142.07   1
  -1   5   2 4192.48  153.80   5
  -1   5   2 3869.39  198.15   2
   0  -5  -2 66.3741  4.5601   1
   0  -5  -2 68.9184  7.3554   4
   0  -5  -2 62.0583  4.3756   1
   0  -5  -2 64.6650  3.6639   5
   0   5   2 63.0037  4.4611   5
   0   5   2 64.9061  7.7195   1
   0   5   2 62.5695  4.1733   1
   0   5   2 70.5410  6.4438   4
  -1  -5  -2 1348.99   66.73   5
  -1  -5  -2 1507.94  144.15   4
  -1  -5  -2 1427.78   65.24   1
   1   5   2 1470.87  124.85   4
   1   5   2 1426.58   59.41   1
   1   5   2 1490.49   66.12   1
  -2  -5  -2 2.19722 1.78007   1
  -2  -5  -2 4.16205 2.26392   4
  -2  -5  -2 4.47935 1.76487   3
  -2  -5  -2 6.45014 1.13048   2
   2   5   2 4.41229 1.86590   1
   2   5   2 4.49241 2.31986   1
  -3  -5  -2 4725.65  222.64   4
  -3  -5  -2 4694.63  246.35   1
   3   5   2 4531.00  186.33   1
   3   5   2 4602.63  174.64   1
  -4  -5  -2 246.192  16.474   5
  -4  -5  -2 249.285  18.501   4
  -4  -5  -2 241.597  11.889   1
   4   5   2 233.570   8.729   1
   4   5   2 268.713  15.430   8
   4   5   2 255.832  13.680   1
   4   5   2 237.507  15.380   3
   4   5   2 240.761  12.365   2
  -5  -5  -2 119.244  13.331   4
  -5  -5  -2 140.946   8.424   1
  -5  -5  -2 146.498   9.224   7
  -5  -5  -2 99.8198  9.2097   5
   5   5   2 131.468   9.337   2
   5   5   2 123.969   5.916   1
   5   5   2 122.332   8.735   1
   5   5   2 159.337  12.029   3
  -6  -5  -2 72.1784  8.9325   4
  -6  -5  -2 64.2656  5.4621   1
  -6  -5  -2 52.0978  5.6343   7
   6   5   2 55.6201  6.3069   3
   6   5   2 55.8951  5.3434   1
   6   5   2 60.0815  3.8374   1
  -7  -5  -2 8.37009 4.89954   4
  -7  -5  -2 7.84851 3.70470   7
   7   5   2 5.73737 4.13658   3
   7   5   2 4.10348 2.26188   1
  -8  -5  -2 13.9509  5.6246   4
  -8  -5  -2 17.3780  5.3511   7
   8   5   2 15.6422  2.5130   1
   8   5   2 20.9120  6.6983   3
  -9  -5  -2 177.704  15.634   7
  -9  -5  -2 171.313  23.454   6
  -9  -5  -2 167.205  16.342   4
   9   5   2 175.953  16.640   3
 -10  -5  -2 7.87971 6.98731   4
 -10  -5  -2 11.4521  5.3390   6
 -10  -5  -2 7.56397 7.07557   7
  10   5   2 3.40542 5.94787   3
 -11  -5  -2 139.867  18.316   4
 -11  -5  -2 113.787  13.590   7
  11   5   2 144.491  17.731   3
  10  -6  -2 50.4125 47.4689   3
  10  -6  -2 -3.9616  7.4072   5
 -10   6   2 13.2368  7.8896   7
   9  -6  -2 30.4143  7.3457   3
   9  -6  -2 40.8162  8.0690   5
  -9   6   2 34.9515  8.9453   7
   8  -6  -2 11.3497  3.3418   1
   8  -6  -2 20.9646  5.7769   5
   8  -6  -2 4.26262 6.10679   3
  -8   6   2 10.7727  6.5172   7
   7  -6  -2 127.084  10.520   5
   7  -6  -2 107.641  10.644   3
   7  -6  -2 117.247   8.985   1
  -7   6   2 122.017  10.144   7
   6  -6  -2 97.2154 10.5462   3
   6  -6  -2 95.0156  7.5195   1
   6  -6  -2 98.2046  6.4446   2
   6  -6  -2 90.0392  8.0378   5
  -6   6   2 97.7341  7.1432   7
   5  -6  -2 4.83658 2.35711   1
   5  -6  -2 0.57406 2.83466   1
   5  -6  -2 -0.9361  2.9442   5
   5  -6  -2 -1.9727  3.1317   3
   5  -6  -2 0.97128 3.17171   2
  -5   6   2 1.82078 2.31752   1
   4  -6  -2 450.628  37.187   3
   4  -6  -2 393.286  25.107   1
   4  -6  -2 409.093  27.880   1
   4  -6  -2 421.036  33.922   4
   4  -6  -2 402.666  22.282   2
   4  -6  -2 427.250  42.217   5
  -4   6   2 396.921  18.226   1
   3  -6  -2 49.7975  4.2250   5
   3  -6  -2 54.2644  4.8078   1
   3  -6  -2 45.5008  4.5314   1
   3  -6  -2 45.6904  5.0916   4
   3  -6  -2 48.2462  3.6677   2
  -3   6   2 47.6656  4.0773   1
   2  -6  -2 3961.08  218.28   2
   2  -6  -2 3809.63  193.01   5
   2  -6  -2 3953.58  303.65   4
   2  -6  -2 3337.10  156.10   1
  -2   6   2 3740.11  162.82   2
  -2   6   2 3777.10  132.86   1
   1  -6  -2 13.9749  4.7114   4
  -1   6   2 1.92972 1.53864   2
  -1   6   2 5.06982 3.27902   1
  -1   6   2 3.30718 3.01931   5
   0  -6  -2 256.619  13.550   1
   0  -6  -2 289.212  28.635   4
   0  -6  -2 298.498  17.320   5
   0   6   2 312.579  17.339   1
   0   6   2 316.132  19.676   5
  -1  -6  -2 5.33687 1.84416   1
  -1  -6  -2 1.15606 2.01112   4
  -1  -6  -2 3.04502 0.99919   5
   1   6   2 4.85386 2.06661   1
  -2  -6  -2 307.956  30.461   3
  -2  -6  -2 353.158  32.387   4
  -2  -6  -2 327.015  17.181   1
  -2  -6  -2 269.642  17.467   2
  -2  -6  -2 314.935  22.918   5
   2   6   2 332.784  14.104   1
  -3  -6  -2 137.737  15.369   4
  -3  -6  -2 141.356   6.771   1
  -3  -6  -2 106.397  10.282   2
  -3  -6  -2 114.904   8.155   5
   3   6   2 149.631   7.084   1
   3   6   2 140.054   6.446   1
  -4  -6  -2 65.4115  4.6509   1
  -4  -6  -2 49.5670  4.8220   5
  -4  -6  -2 74.3632  5.2775   4
   4   6   2 69.3549  5.1971   1
   4   6   2 63.6523  5.3621   8
   4   6   2 62.8175  5.0456   1
   4   6   2 69.6444  6.0628   3
  -5  -6  -2 55.4567  7.9848   4
  -5  -6  -2 53.2267  5.2621   1
   5   6   2 64.2689  6.0723   3
   5   6   2 59.2746  4.6303   1
   5   6   2 56.3201  6.8133   1
  -6  -6  -2 70.2760  9.5877   4
  -6  -6  -2 51.2890  4.2976   1
   6   6   2 69.8668  4.8604   1
   6   6   2 64.8549  7.2110   3
  -7  -6  -2 18.0092  5.6844   4
   7   6   2 11.3208  3.6135   3
   7   6   2 16.6251  2.8223   1
  -8  -6  -2 30.6683  7.5140   4
  -8  -6  -2 47.5912  7.8765   7
   8   6   2 41.9300  3.9789   1
   8   6   2 50.2609  7.6171   3
  -9  -6  -2 52.2851  7.8017   7
  -9  -6  -2 52.3488  8.2202   4
   9   6   2 36.7038  7.3605   3
   9   6   2 46.8603  8.1464   1
 -10  -6  -2 15.2845  7.0204   7
 -10  -6  -2 13.3101  6.6250   6
 -10  -6  -2 16.3402  7.6774   4
  10   6   2 15.7974  6.4209   3
 -11  -6  -2 120.362  18.133   4
  11   6   2 131.119  14.083   3
  10  -7  -2 -9.1372  6.4185   5
  10  -7  -2 -0.8144  7.2182   3
 -10   7   2 0.38718 6.85726   7
   9  -7  -2 8.74655 5.74032   3
   9  -7  -2 21.6611  8.0061   5
  -9   7   2 42.4593 11.7478   7
   8  -7  -2 109.386  12.241   3
   8  -7  -2 121.776  12.986   5
   8  -7  -2 97.6636 11.1119   1
  -8   7   2 104.695  12.528   7
   7  -7  -2 323.595  38.156   1
   7  -7  -2 305.669  22.062   5
   7  -7  -2 287.480  22.935   3
  -7   7   2 315.845  25.401   7
   6  -7  -2 0.30907 4.01722   3
   6  -7  -2 -0.0619  2.9516   1
   6  -7  -2 -3.1336  3.7410   2
   6  -7  -2 2.32203 3.98483   5
   5  -7  -2 11.4840  3.5579   2
   5  -7  -2 13.0921  3.8875   5
   5  -7  -2 14.2093  3.9946   3
   5  -7  -2 11.8139  3.5069   1
  -5   7   2 17.6034  3.1831   1
   4  -7  -2 33.7106  5.2704   5
   4  -7  -2 41.7101  6.8969   4
   4  -7  -2 25.1779  4.0491   2
   4  -7  -2 40.7502  5.0294   3
   4  -7  -2 29.8158  3.8999   1
  -4   7   2 32.6665  4.6581   1
   3  -7  -2 96.1478  8.7935   4
   3  -7  -2 103.962   7.498   1
   3  -7  -2 90.4131  7.3863   5
   3  -7  -2 104.503   5.709   2
  -3   7   2 95.5161  6.3189   1
   2  -7  -2 70.6079  4.4265   5
   2  -7  -2 55.7638  5.4316   1
   2  -7  -2 65.3355  4.3099   2
   2  -7  -2 65.6617  7.1464   4
  -2   7   2 67.0505  4.7720   1
  -2   7   2 58.9893  6.6009   2
   1  -7  -2 410.700  21.642   1
   1  -7  -2 468.846  22.576   5
   1  -7  -2 473.902  45.813   4
  -1   7   2 438.021  43.849   5
  -1   7   2 431.919  29.706   2
  -1   7   2 431.342  21.516   1
   0  -7  -2 14.7537  4.1669   1
   0  -7  -2 9.89829 2.79355   5
   0   7   2 12.5426  4.6448   1
   0   7   2 15.4246  3.4465   5
  -1  -7  -2 1265.94   58.99   1
  -1  -7  -2 1069.29   55.39   5
  -1  -7  -2 1260.43  117.19   4
   1   7   2 1250.64   43.54   1
  -2  -7  -2 9.69554 1.76502   5
  -2  -7  -2 12.9059  4.4185   4
  -2  -7  -2 5.89234 1.37749   2
  -2  -7  -2 15.9704  5.1189   1
   2   7   2 13.4584  3.9942   1
  -3  -7  -2 870.802  96.075   4
  -3  -7  -2 766.684  77.106   5
  -3  -7  -2 870.194  45.818   1
  -3  -7  -2 723.350  59.192   2
   3   7   2 861.175  39.120   1
  -4  -7  -2 155.778  25.339   2
  -4  -7  -2 168.786  13.009   5
  -4  -7  -2 211.977  15.243   1
  -4  -7  -2 200.877  12.885   4
   4   7   2 208.534  11.136   1
  -5  -7  -2 22.6165  4.8066   4
  -5  -7  -2 19.4903  3.4578   1
   5   7   2 23.6635  3.2437   1
   5   7   2 21.1650  2.6976   8
  -6  -7  -2 -0.0335  3.4619   1
  -6  -7  -2 1.75514 3.34988   4
   6   7   2 3.44126 3.02787   3
   6   7   2 6.42214 3.10448   1
  -7  -7  -2 38.1296  7.3224   4
   7   7   2 19.3524  3.5066   1
   7   7   2 26.2999  6.4176   3
  -8  -7  -2 -3.3239  5.6032   4
   8   7   2 2.52113 3.10499   1
   8   7   2 5.96732 5.54466   3
  -9  -7  -2 7.58537 7.15452   4
   9   7   2 -1.7426  5.3105   3
   9   7   2 2.95582 3.74633   1
 -10  -7  -2 66.4017 14.1838   4
 -10  -7  -2 61.8083 12.7593   6
  10   7   2 61.1302 11.3029   3
 -11  -7  -2 144.160  24.251   4
 -11  -7  -2 71.7264 15.1288   6
  11   7   2 97.8914 14.4257   3
  10  -8  -2 -0.8854  8.8733   3
  10  -8  -2 6.66166 8.65347   5
 -10   8   2 -1.3978  7.9058   7
   9  -8  -2 -5.5536  7.2751   3
   9  -8  -2 -2.7776  5.6732   5
  -9   8   2 -6.5040  6.1432   7
   8  -8  -2 147.379  17.278   1
   8  -8  -2 170.222  17.358   5
   8  -8  -2 164.575  18.133   3
  -8   8   2 164.448  15.698   7
   7  -8  -2 15.2975  4.7189   1
   7  -8  -2 31.7087  6.4745   5
   7  -8  -2 11.1580  5.2724   3
  -7   8   2 14.5004  5.2434   7
   6  -8  -2 83.8051  8.2246   5
   6  -8  -2 72.7896  6.3408   1
   6  -8  -2 77.5022  9.5980   3
   5  -8  -2 47.0302  5.5329   5
   5  -8  -2 45.7313  5.6970   3
   5  -8  -2 46.3008  6.1331   4
   5  -8  -2 52.6635  7.1785   2
   5  -8  -2 33.7149  4.3223   1
  -5   8   2 51.5095  6.1660   1
   4  -8  -2 923.350  94.330   4
   4  -8  -2 845.484  58.348   1
   4  -8  -2 828.665  73.153   5
   4  -8  -2 915.917  64.266   2
   4  -8  -2 937.928  83.257   3
  -4   8   2 912.202  50.954   1
   3  -8  -2 114.460   9.088   2
   3  -8  -2 95.6427  6.9160   1
   3  -8  -2 117.515  10.444   4
   3  -8  -2 102.489   8.040   5
  -3   8   2 111.667   7.746   1
   2  -8  -2 -0.1819  2.5124   5
   2  -8  -2 2.71264 2.32780   4
   2  -8  -2 -1.0579  1.3244   2
   2  -8  -2 3.55533 3.23022   1
  -2   8   2 0.33618 1.73495   2
  -2   8   2 -0.4034  2.2407   1
   1  -8  -2 63.7749  4.6997   1
   1  -8  -2 62.5590  6.4952   4
   1  -8  -2 58.5385  5.1554   5
  -1   8   2 69.5805  5.4136   1
   0  -8  -2 2201.84  104.10   1
   0  -8  -2 1998.66  141.84   5
   0  -8  -2 1988.46  160.74   4
   0   8   2 2095.53   66.50   1
   0   8   2 2129.97  217.78   5
  -1  -8  -2 3.31482 2.62669   4
  -1  -8  -2 4.65627 1.48655   5
  -1  -8  -2 2.32956 2.66021   1
   1   8   2 8.82893 3.25270   1
  -2  -8  -2 169.384  16.305   4
  -2  -8  -2 184.826  10.605   1
  -2  -8  -2 171.723  13.388   5
   2   8   2 183.162  11.197   1
  -3  -8  -2 97.9070  6.6091   1
  -3  -8  -2 62.7851  6.4364   2
  -3  -8  -2 71.9328  6.3544   5
  -3  -8  -2 78.6221  7.8884   4
   3   8   2 81.0237  8.0906   1
  -4  -8  -2 257.418  20.656   4
  -4  -8  -2 270.612  17.147   1
   4   8   2 273.423  14.584   1
  -5  -8  -2 88.6870  8.5206   1
  -5  -8  -2 115.405  10.139   4
   5   8   2 79.5417  6.7711   1
  -6  -8  -2 6.85465 4.32015   4
   6   8   2 2.36509 2.75064   1
  -7  -8  -2 180.101  17.040   4
   7   8   2 173.836  16.269   3
   7   8   2 169.533  12.393   1
  -8  -8  -2 58.0777  9.8260   4
   8   8   2 39.0245  5.4924   1
   8   8   2 57.4311  8.6860   3
  -9  -8  -2 28.0364  7.9055   4
   9   8   2 12.1395  4.1074   1
   9   8   2 15.3715  6.4876   3
 -10  -8  -2 64.1461 10.7367   6
 -10  -8  -2 74.6232 11.7824   4
  10   8   2 65.4554 11.7932   3
   9  -9  -2 -3.4364  7.4146   3
   9  -9  -2 -1.5379  2.7422   1
   9  -9  -2 5.12910 8.11506   5
  -9   9   2 4.67431 6.43098   7
   8  -9  -2 4.38049 4.93294   1
   8  -9  -2 -3.9194  5.3953   3
   8  -9  -2 6.28573 6.04521   5
  -8   9   2 2.16320 5.50898   7
   7  -9  -2 50.7833  8.1132   5
   7  -9  -2 44.8217  5.9825   1
   7  -9  -2 48.7079  9.4993   3
   6  -9  -2 4.66745 4.32663   5
   6  -9  -2 15.3884  5.9577   3
   6  -9  -2 4.84562 3.44972   1
   5  -9  -2 828.495  48.404   5
   5  -9  -2 727.842  52.451   4
   5  -9  -2 743.974  55.979   1
   5  -9  -2 849.186  72.694   3
  -5   9   2 722.247  59.624   1
   4  -9  -2 46.4873  5.2603   1
   4  -9  -2 47.9590  4.8408   5
   4  -9  -2 28.7078  5.6775   4
   4  -9  -2 31.1714  4.7459   2
   4  -9  -2 43.8758  7.0973   3
  -4   9   2 42.5179  6.0601   1
   3  -9  -2 722.106  52.529   2
   3  -9  -2 709.004  40.024   5
   3  -9  -2 743.318  53.405   4
   3  -9  -2 785.809  52.172   1
  -3   9   2 752.158  41.352   1
   2  -9  -2 1.03705 2.76183   1
   2  -9  -2 -0.3882  2.9173   5
   2  -9  -2 1.16812 2.84812   4
  -2   9   2 0.41789 3.34962   1
  -2   9   2 0.92403 1.51048   2
   1  -9  -2 -0.3957  1.9734   5
   1  -9  -2 1.94513 3.03141   1
   1  -9  -2 -2.7444  2.2998   4
  -1   9   2 -0.0772  2.6745   1
   0  -9  -2 -0.2515  3.3046   1
   0  -9  -2 1.33288 2.60417   4
   0  -9  -2 -0.8620  1.7248   5
   0   9   2 -1.9429  1.8129   5
   0   9   2 0.07596 3.05839   1
  -1  -9  -2 46.7835  5.9133   4
  -1  -9  -2 44.8269  5.6010   1
  -1  -9  -2 43.5399  3.2873   5
   1   9   2 46.9440  5.4030   1
  -2  -9  -2 88.3726  9.7777   4
  -2  -9  -2 71.5718  5.1979   5
  -2  -9  -2 82.9442  7.3841   1
   2   9   2 96.4574  6.4243   1
  -3  -9  -2 25.6957  6.2270   4
  -3  -9  -2 29.9951  4.6301   1
  -3  -9  -2 20.5328  2.1734   5
   3   9   2 18.7007  3.4368   1
  -4  -9  -2 115.879   9.294   1
  -4  -9  -2 111.937  11.828   4
   4   9   2 111.663   7.199   1
  -5  -9  -2 1943.34  195.89   4
  -5  -9  -2 2010.33  148.81   1
   5   9   2 2013.52  109.51   1
  -6  -9  -2 211.290  17.793   4
   6   9   2 198.092  10.221   1
  -7  -9  -2 6.71451 5.48281   4
   7   9   2 1.27670 3.56662   1
  -8  -9  -2 33.5138  8.4267   4
   8   9   2 28.9744  5.7962   1
  -9  -9  -2 12.7492  8.3317   4
   9   9   2 13.5749  5.2858   1
 -10  -9  -2 74.6438 16.5920   4
   9 -10  -2 40.6664  8.2126   5
   9 -10  -2 42.2684  9.8437   3
  -9  10   2 28.7229  9.4129   7
   8 -10  -2 34.6492  9.9735   3
   8 -10  -2 41.6606  7.7884   1
   8 -10  -2 49.3251  8.4440   5
  -8  10   2 22.5888  7.0789   7
   7 -10  -2 12.9926  6.7011   3
   7 -10  -2 9.70637 5.56104   5
   7 -10  -2 9.61103 4.50420   1
   6 -10  -2 14.8824  5.5857   3
   6 -10  -2 12.2680  4.4899   1
   6 -10  -2 14.9564  5.1235   5
   5 -10  -2 139.861  15.036   5
   5 -10  -2 151.271  16.437   3
   5 -10  -2 136.249  12.965   1
   5 -10  -2 340.300  70.581   4
   4 -10  -2 42.3370  5.6286   4
   4 -10  -2 55.0389  6.8482   1
   4 -10  -2 42.1107  6.5934   3
   4 -10  -2 47.6919  6.7847   5
  -4  10   2 39.1523  6.4006   1
   3 -10  -2 124.971  11.901   5
   3 -10  -2 104.342   8.960   1
   3 -10  -2 97.6520 11.1285   4
  -3  10   2 109.065   8.931   1
   2 -10  -2 11.3230  3.9731   4
   2 -10  -2 12.5875  3.8464   5
  -2  10   2 7.99843 3.53941   1
   1 -10  -2 0.74529 2.87231   4
   1 -10  -2 -0.9604  2.8453   1
   1 -10  -2 1.82352 2.32769   5
  -1  10   2 3.92878 2.50311   1
   0 -10  -2 249.242  16.108   5
   0 -10  -2 270.117  14.421   1
   0 -10  -2 255.374  25.804   4
   0  10   2 255.866  15.521   1
  -1 -10  -2 22.4670  4.5461   1
  -1 -10  -2 21.3919  2.8824   5
  -1 -10  -2 17.9889  5.4870   4
   1  10   2 26.1071  3.7821   1
  -2 -10  -2 910.309  59.343   5
  -2 -10  -2 1064.38   67.54   1
  -2 -10  -2 1124.00  104.21   4
   2  10   2 1072.35   44.36   1
  -3 -10  -2 80.2169  8.7424   4
  -3 -10  -2 81.5858  8.1725   1
   3  10   2 85.8884  8.1731   1
  -4 -10  -2 716.623  46.403   4
  -4 -10  -2 752.842  43.062   1
   4  10   2 695.312  31.462   1
  -5 -10  -2 2.35343 5.08680   1
  -5 -10  -2 0.36739 4.62508   4
   5  10   2 10.6911  5.0477   1
  -6 -10  -2 12.8879  5.8100   4
   6  10   2 10.7287  3.7830   1
  -7 -10  -2 13.2873  5.8015   4
   7  10   2 25.8071  5.4097   1
  -8 -10  -2 215.674  20.242   4
   8  10   2 249.302  23.440   1
  -9 -10  -2 1.29916 8.44118   4
   9  10   2 1.18885 4.67962   1
   8 -11  -2 9.82211 6.27687   1
   8 -11  -2 22.0850  7.3550   5
   8 -11  -2 18.0529  8.4550   3
  -8  11   2 15.4878  8.0724   7
   7 -11  -2 12.7027  7.5356   5
   7 -11  -2 9.83894 4.99036   1
   7 -11  -2 5.82923 5.94963   3
   6 -11  -2 12.2831  5.8881   5
   6 -11  -2 6.48585 4.61380   1
   6 -11  -2 15.7083  6.6866   3
   5 -11  -2 0.12092 4.59535   4
   5 -11  -2 2.01431 4.78431   5
   5 -11  -2 6.20745 6.14664   3
   5 -11  -2 10.4604  3.9783   1
   4 -11  -2 -4.2228  3.0689   1
   4 -11  -2 -2.4718  5.1814   4
   4 -11  -2 1.86264 3.78647   3
   4 -11  -2 1.07825 4.08787   5
  -4  11   2 0.71129 3.68836   1
   3 -11  -2 208.656  21.704   4
   3 -11  -2 236.238  20.475   1
   3 -11  -2 216.477  20.301   5
  -3  11   2 230.517  19.117   1
   2 -11  -2 13.2288  4.3320   4
   2 -11  -2 19.2846  4.3172   1
   2 -11  -2 14.7152  3.8067   5
  -2  11   2 11.7498  3.4497   1
   1 -11  -2 9.32822 4.47111   1
   1 -11  -2 11.4590  3.7865   4
   1 -11  -2 6.43269 2.78885   5
  -1  11   2 5.10168 3.42446   1
   0 -11  -2 3.70805 3.89555   1
   0 -11  -2 3.07314 2.37862   5
   0 -11  -2 6.75488 4.40109   4
   0  11   2 11.1444  4.5482   1
  -1 -11  -2 55.2182  5.6270   5
  -1 -11  -2 84.1066  8.8323   1
  -1 -11  -2 59.7594  8.7074   4
   1  11   2 77.6596  7.0214   1
  -2 -11  -2 17.8912  5.1543   4
  -2 -11  -2 13.3214  3.8280   1
   2  11   2 10.8294  3.3388   1
  -3 -11  -2 18.4599  5.7116   4
  -3 -11  -2 6.04297 4.06322   1
   3  11   2 16.2077  4.4860   1
  -4 -11  -2 2.78746 5.03517   1
  -4 -11  -2 16.7156  5.2733   4
   4  11   2 3.49072 5.65802   1
  -5 -11  -2 31.2784  6.0555   1
  -5 -11  -2 33.4093  7.1691   4
   5  11   2 27.4740  5.4176   1
  -6 -11  -2 105.060  14.649   4
   6  11   2 84.8839  8.2267   1
  -7 -11  -2 117.026  14.882   4
   7  11   2 117.977  13.691   1
  -8 -11  -2 219.177  25.102   4
   8  11   2 228.627  27.342   1
  -9 -11  -2 32.0726  9.2872   4
   9  11   2 26.8469  7.2285   1
   8 -12  -2 0.47759 6.15864   1
   8 -12  -2 9.21549 8.74063   5
  -8  12   2 -0.7997  7.7457   7
   7 -12  -2 19.7802  5.8235   1
   7 -12  -2 14.2191  8.6049   5
   6 -12  -2 13.4740  5.0840   1
   6 -12  -2 19.0494  6.2253   5
   5 -12  -2 11.8199  6.3049   4
   5 -12  -2 9.15341 6.45983   5
   5 -12  -2  2.4248 10.5921   3
   5 -12  -2 0.18200 4.20335   1
   4 -12  -2 110.269  10.044   1
   4 -12  -2 111.212  16.354   3
   4 -12  -2 128.648  12.792   4
   4 -12  -2 116.377  14.717   5
  -4  12   2 112.628  13.825   1
   3 -12  -2 11.5495  5.5071   5
   3 -12  -2 12.0940  4.2261   1
   3 -12  -2  1.9244 10.2075   4
  -3  12   2 11.6149  4.7767   1
   2 -12  -2 3.55653 4.23776   5
   2 -12  -2 4.87231 5.17498   1
   2 -12  -2 0.90202 3.33019   4
  -2  12   2 -3.7355  4.6497   1
   1 -12  -2 5.97956 4.13844   4
   1 -12  -2 4.77287 5.66108   1
   1 -12  -2 2.22096 3.37361   5
  -1  12   2 -1.8095  4.4210   1
   0 -12  -2 61.9946  8.7685   4
   0 -12  -2 62.6828  9.3373   1
   0  12   2 58.7617  7.6919   1
  -1 -12  -2 14.8663  5.9141   1
  -1 -12  -2 10.5479  4.0680   4
   1  12   2 16.6662  4.6773   1
  -2 -12  -2 31.5583  6.5891   1
  -2 -12  -2 35.5585  8.4380   4
   2  12   2 33.4526  6.1936   1
  -3 -12  -2 24.1746  5.5658   4
  -3 -12  -2 15.1317  4.9381   1
   3  12   2 28.4373  5.0475   1
  -4 -12  -2 4.11646 5.29536   4
  -4 -12  -2 3.10760 4.41091   1
   4  12   2 3.04444 3.45249   1
  -5 -12  -2 41.1266  6.9346   1
  -5 -12  -2 38.6591  8.7680   4
   5  12   2 48.0195  7.3091   1
  -6 -12  -2 206.860  23.641   4
   6  12   2 202.278  15.211   1
  -7 -12  -2 70.0573 11.3303   4
   7  12   2 82.4050  8.9461   1
  -8 -12  -2 17.2805  6.8133   4
   8  12   2 20.0150  5.4733   1
   7 -13  -2 23.3729  9.4715   5
   7 -13  -2 10.2943  6.6003   1
   6 -13  -2 10.2466  6.3458   1
   6 -13  -2 12.2093  6.3644   5
   5 -13  -2 303.188  27.685   5
   5 -13  -2 274.236  35.206   1
   4 -13  -2 -3.3606  7.9538   4
   4 -13  -2 0.03557 5.00807   5
   4 -13  -2 8.36150 6.10170   1
   3 -13  -2 33.1678  6.1514   4
   3 -13  -2 23.4922  5.8755   5
   3 -13  -2 22.4528  6.6205   1
  -3  13   2 23.0954  6.4408   1
   2 -13  -2 0.76149 4.67765   1
   2 -13  -2 0.06905 4.32200   5
   2 -13  -2 -1.9884  3.6650   4
  -2  13   2 2.07449 4.64933   1
   1 -13  -2 61.8731  8.3618   1
   1 -13  -2 44.3330  8.4353   4
  -1  13   2 54.6458  9.1412   1
   0 -13  -2 32.3598  6.6569   1
   0 -13  -2 17.2351  5.0644   4
   0  13   2 20.3221  4.7164   1
  -1 -13  -2 36.7125  6.6912   1
  -1 -13  -2 49.3212  6.3881   4
   1  13   2 42.1958  6.3300   1
  -2 -13  -2 3.74067 4.95793   1
  -2 -13  -2 2.53283 5.27914   4
   2  13   2 -1.9599  4.1858   1
  -3 -13  -2 101.122  12.095   4
  -3 -13  -2 85.1134 11.5034   1
   3  13   2 77.9834  7.9304   1
  -4 -13  -2 -3.1492  5.1452   4
  -4 -13  -2 -0.7852  5.8531   1
   4  13   2 1.66095 3.87915   1
  -5 -13  -2 8.89171 6.34324   4
   5  13   2 19.7480  5.7004   1
  -6 -13  -2 32.4087  8.2562   4
   6  13   2 39.2582  7.7903   1
  -7 -13  -2 86.0004 14.4024   4
   7  13   2 54.0583  9.9118   1
  -8 -13  -2 1.70673 5.99085   4
   8  13   2 0.55801 6.55976   1
   6 -14  -2 38.7977  9.0935   1
   6 -14  -2 55.9995  9.1251   5
   5 -14  -2 -3.4695  5.8558   1
   5 -14  -2 0.30080 7.57733   5
   4 -14  -2 106.774  15.149   1
   4 -14  -2 142.433  15.812   5
   3 -14  -2 -0.1254 52.8531   1
  -3  14   2 3.21102 4.67654   1
   2 -14  -2 139.011  13.984   1
   2 -14  -2 138.079  18.567   4
  -2  14   2 117.796  12.009   1
   1 -14  -2 6.48740 5.18892   4
   1 -14  -2 11.7099  5.9451   1
  -1  14   2 7.54871 5.20464   1
   0 -14  -2 7.09498 5.90492   1
   0 -14  -2 18.5907  6.5565   4
   0  14   2 6.22274 4.79553   1
  -1 -14  -2 -2.8287  3.8405   1
  -1 -14  -2 12.2632  6.0190   4
   1  14   2 2.46424 3.32554   1
  -2 -14  -2 10.1851  6.5773   4
  -2 -14  -2 4.92127 4.32502   1
  -3 -14  -2 10.4470  6.6804   4
  -3 -14  -2 -1.5585  6.7022   1
   3  14   2 3.24597 4.76348   1
  -4 -14  -2 1.50241 5.97363   4
  -4 -14  -2 -2.3643  6.3869   1
   4  14   2 -5.0954  4.0358   1
  -5 -14  -2 0.06531 6.47556   4
   5  14   2 5.39844 4.91520   1
  -6 -14  -2 79.6038 13.3143   4
   6  14   2 70.6939  9.1353   1
  -7 -14  -2 -3.8564  8.1794   4
   7  14   2 8.81486 7.33737   1
   5 -15  -2 225.966  30.672   1
   4 -15  -2 7.68036 4.12238   1
   3 -15  -2 30.4664  6.5571   1
  -3  15   2 40.8014  8.3905   1
   2 -15  -2 3.61426 4.17545   1
  -2  15   2 3.06582 5.26662   1
   1 -15  -2 -1.7093  4.4963   4
   1 -15  -2 -0.8889  4.5692   1
  -1  15   2 4.06920 3.79560   1
   0 -15  -2 0.86698 4.64892   4
   0 -15  -2 -0.5438  4.0184   1
   0  15   2 2.69891 4.19895   1
  -1 -15  -2 100.711  16.253   4
  -1 -15  -2 126.359  16.623   1
   1  15   2 126.573  14.618   1
  -2 -15  -2 -5.0975  7.2245   1
  -2 -15  -2 4.46643 7.04474   4
   2  15   2 3.81293 5.22089   1
  -3 -15  -2 18.9285  9.0747   1
  -3 -15  -2 28.8133  7.9961   4
  -4 -15  -2 6.64288 7.99752   4
  -4 -15  -2 10.1987  8.2149   1
   4  15   2 4.27046 4.67911   1
  -5 -15  -2 92.3533 14.2613   4
   5  15   2 95.2650 14.1380   1
  -6 -15  -2 15.2051  8.9370   4
   6  15   2 8.65221 7.37666   1
   4 -16  -2 5.11210 8.49479   1
   3 -16  -2 0.52481 4.56970   1
   2 -16  -2 -0.8533  4.2914   1
  -2  16   2 7.99679 6.30835   1
   1 -16  -2 -1.9076  4.8321   1
  -1  16   2 5.04235 7.36265   1
   0 -16  -2 0.82235 4.57118   1
   0  16   2 10.1420  6.2233   1
  -1 -16  -2 3.46960 5.45187   1
  -1 -16  -2 8.22750 6.76471   4
   1  16   2 -1.8005  5.5309   1
  -2 -16  -2 11.7058  8.9782   4
  -2 -16  -2 8.58541 7.89693   1
   2  16   2 13.8062  8.3712   1
  -3 -16  -2 6.88877 7.98925   4
  -3 -16  -2 12.1651  8.4871   1
   3  16   2 6.45295 4.70620   1
  -4 -16  -2 29.2907  9.6265   4
   4  16   2 15.3891  5.6938   1
   1 -17  -2 1.60242 5.03998   1
  -1  17   2 6.81374 6.58589   1
   0 -17  -2 1.21847 9.63715   1
   0  17   2 8.28164 9.68723   1
  -1 -17  -2 38.0624 10.7586   1
   1  17   2 40.1579 10.5135   1
  -2 -17  -2 0.57240 4.80961   4
   2  16  -3 8.33141 8.17119   1
  -2 -16   3 -4.2352  8.9698   1
   1  16  -3 101.542  14.569   1
  -1 -16   3 88.2103 14.4509   1
   0  16  -3 -5.6045  8.5173   1
   0 -16   3 -16.740   8.977   1
  -1  16  -3 16.2063  9.1881   1
   1 -16   3 15.1851  7.0069   1
  -2  16  -3 -3.3730  8.6120   1
   2 -16   3 14.5581  8.7974   1
   4  15  -3 3.64041 7.84029   1
  -4 -15   3 13.5181 10.2552   1
  -4 -15   3 2.39215 5.88085   4
   3  15  -3 8.44034 7.51447   1
  -3 -15   3 6.91682 6.75275   4
  -3 -15   3 1.41705 8.75039   1
   2  15  -3 39.3499  8.2497   1
  -2 -15   3 30.1134  9.2746   1
   1  15  -3 9.98207 6.42593   1
  -1 -15   3 -0.7377  6.7189   1
   0  15  -3 68.4311 11.6944   1
   0 -15   3 51.9278 11.1674   1
  -1  15  -3 1.07224 6.23051   1
   1 -15   3 -11.239   6.242   1
  -2  15  -3 102.492  17.298   1
   2 -15   3 107.237  14.485   1
   3 -15   3 25.0325  9.4717   1
   4 -15   3 13.3979  8.6108   1
   6  14  -3 10.4334  7.3026   1
  -6 -14   3 -3.5018  7.6518   4
   5  14  -3 332.145  33.395   1
  -5 -14   3 273.281  35.172   4
   4  14  -3 1.16138 6.48455   1
  -4 -14   3 15.5821  8.6250   1
  -4 -14   3 4.94075 6.89276   4
   3  14  -3 3.33908 5.82041   1
  -3 -14   3 1.04733 5.99390   4
  -3 -14   3 11.4000  7.5178   1
   2  14  -3 13.1278  5.7816   1
  -2 -14   3 1.41997 5.89737   4
  -2 -14   3 10.3817  6.4367   1
   1  14  -3 78.7629 11.2268   1
  -1 -14   3 81.7214 11.9042   1
   0  14  -3 3.95185 6.91300   1
   0 -14   3 1.93979 5.61546   1
  -1  14  -3 6.66039 5.05618   1
   1 -14   3 15.8128  5.2596   1
  -2  14  -3 -2.3146  6.5878   1
   2 -14   3 12.1650  7.0346   1
  -3  14  -3 -1.0221  6.3819   1
   3 -14   3 -1.5936  5.9442   5
   3 -14   3 3.59624 6.83679   1
   4 -14   3 -5.5846  5.1759   5
   4 -14   3 10.8139  7.3683   1
   5 -14   3 7.60440 6.59685   5
   5 -14   3 7.10032 5.15796   1
   6 -14   3 -0.8012  7.5618   1
   7  13  -3 3.56607 6.52086   1
  -7 -13   3 -2.0996  8.3797   4
   6  13  -3 -6.0437  5.9409   1
  -6 -13   3 8.36899 7.94955   4
   5  13  -3 27.8872  7.9645   1
  -5 -13   3 25.8070  8.6214   4
   4  13  -3 5.14137 5.45382   1
  -4 -13   3 -3.8721  5.2551   4
  -4 -13   3 -1.2593  5.6482   1
   3  13  -3 3.70288 4.32290   1
  -3 -13   3 3.95948 5.01476   1
  -3 -13   3 0.69611 5.45133   4
   2  13  -3 354.054  34.687   1
  -2 -13   3 366.601  43.249   4
  -2 -13   3 425.925  36.358   1
   1  13  -3 -1.0303  5.8677   1
  -1 -13   3 -2.8444  5.7258   1
  -1 -13   3 -9.3384  3.7898   4
   0  13  -3 48.3302  7.2301   1
   0 -13   3 45.2381  7.9158   1
   0 -13   3 48.2307  7.7298   4
  -1  13  -3 5.17737 5.20069   1
   1 -13   3 -6.6208  4.9136   5
   1 -13   3 -6.1042  4.3982   1
  -2  13  -3 2.54358 6.09324   1
   2 -13   3 -2.3116  5.3113   1
   2 -13   3 2.68830 6.28369   5
  -3  13  -3 10.8220  6.3859   1
   3 -13   3 6.87195 6.04695   1
   3 -13   3 9.75798 6.24929   5
   4 -13   3 134.521  15.113   1
   4 -13   3 144.143  14.654   5
   5 -13   3 2.90614 6.55302   5
   5 -13   3 6.53792 6.42706   1
   6 -13   3 9.85232 6.09130   1
   6 -13   3 -5.0650  6.8751   5
   7 -13   3  3.1453 10.8832   5
   7 -13   3 16.6619  7.6497   1
  -8 -12   3 13.1871  7.7818   4
   7  12  -3 5.64158 6.57872   1
  -7 -12   3 20.9962  7.1857   4
   6  12  -3 17.3774  6.4082   1
  -6 -12   3 3.34718 7.21157   4
   5  12  -3 11.7038  5.8408   1
  -5 -12   3 7.88029 5.83258   4
  -5 -12   3 11.9136  5.7495   1
   4  12  -3 9.67665 5.31327   1
  -4 -12   3 -2.6516  6.6138   1
  -4 -12   3 16.1358  5.4378   4
   3  12  -3 36.3617  6.6646   1
  -3 -12   3 34.0946  7.1611   4
  -3 -12   3 46.0700  7.4128   1
   2  12  -3 15.9460  5.8508   1
  -2 -12   3 21.5441  5.2467   4
  -2 -12   3 19.2797  5.6096   1
   1  12  -3 6.66164 5.27982   1
  -1 -12   3 17.8265  5.6762   4
  -1 -12   3 6.72546 4.77700   1
   0  12  -3 2.46267 3.79688   1
   0 -12   3 6.29525 4.64628   1
   0 -12   3 3.08864 3.84315   5
   0 -12   3 0.18357 4.09104   4
  -1  12  -3 23.0386  5.0950   1
   1 -12   3 28.3513  5.5632   4
   1 -12   3 22.5832  5.0424   5
   1 -12   3 23.9161  5.9700   1
  -2  12  -3 30.8956  6.5519   1
   2 -12   3 39.4464  6.9988   1
   2 -12   3 26.5490  5.7708   5
  -3  12  -3 28.2039  6.3508   1
   3 -12   3 13.8043  5.9662   5
   3 -12   3 15.9982  5.0135   1
   4 -12   3 15.9751  4.8362   1
   4 -12   3 18.3105  6.5540   5
   5 -12   3 42.7710  8.5185   5
   5 -12   3 59.5802  8.3508   1
   6 -12   3 6.39643 4.97479   1
   6 -12   3 1.28392 5.86793   5
   7 -12   3 85.4989 13.7381   1
   7 -12   3 98.6599 16.9280   5
   8  11  -3 161.924  16.250   1
  -8 -11   3 149.343  19.429   4
   7  11  -3 -7.1343  4.6968   1
  -7 -11   3 0.16038 5.38448   4
   6  11  -3 76.7938  9.4445   1
  -6 -11   3 88.5031 13.4933   4
   5  11  -3 6.06886 4.75278   1
  -5 -11   3 -1.0202  4.6622   4
  -5 -11   3 -1.4294  5.2025   1
   4  11  -3 32.8670  6.7375   1
  -4 -11   3 25.5665  5.8652   1
  -4 -11   3 21.3353  6.6805   4
   3  11  -3 35.6242  5.6090   1
  -3 -11   3 35.4195  7.4413   1
  -3 -11   3 38.2726  6.0139   4
   2  11  -3 8.03726 4.94605   1
  -2 -11   3 -0.0173  3.9175   4
  -2 -11   3 -0.1689  2.9742   5
  -2 -11   3 1.04461 5.03161   1
   1  11  -3 1.43156 4.68277   1
  -1 -11   3 -0.6939  3.8110   4
  -1 -11   3 6.89235 3.80181   5
  -1 -11   3 2.64013 3.91145   1
   0  11  -3 5.79503 4.48293   1
   0 -11   3 1.37813 3.96843   4
   0 -11   3 -0.7763  3.2906   5
  -1  11  -3 0.03057 3.47418   1
   1 -11   3 4.98930 3.45525   5
   1 -11   3 5.19763 3.69414   1
   1 -11   3 0.84831 2.42694   4
  -2  11  -3 12.0447  4.2110   1
   2 -11   3 12.2479  3.6737   5
   2 -11   3 15.1570  4.6230   1
  -3  11  -3 5.64894 4.02398   1
   3 -11   3 13.6351  5.2580   5
   3 -11   3 0.19635 4.57947   1
  -4  11  -3 259.213  24.891   1
   4 -11   3 249.570  28.269   5
   4 -11   3 283.488  26.169   1
   5 -11   3 32.9589  5.4097   1
   5 -11   3 33.6886  7.3571   5
   6 -11   3 -1.8331  5.7789   5
   6 -11   3 5.20973 4.74166   1
   7 -11   3 9.34818 7.84874   5
   7 -11   3 10.4719  5.9335   1
   8 -11   3 64.0467 12.1839   5
   8 -11   3 38.8161  7.4694   1
   9  10  -3 10.0412  6.6078   3
   9  10  -3 6.69494 5.53419   1
  -9 -10   3 6.84635 8.61301   4
   8  10  -3 95.2023 12.1332   1
  -8 -10   3 105.564  14.499   4
   7  10  -3 67.2004  8.4330   1
  -7 -10   3 70.0491 11.8985   4
   6  10  -3 117.340  11.265   1
  -6 -10   3 91.0649 10.5486   4
   5  10  -3 223.724  20.012   1
  -5 -10   3 227.231  22.439   4
  -5 -10   3 197.937  18.943   1
   4  10  -3 46.2654  7.8369   1
  -4 -10   3 56.2472  8.4142   4
  -4 -10   3 41.1640  6.0816   1
   3  10  -3 250.126  21.247   1
  -3 -10   3 265.216  24.177   5
  -3 -10   3 284.794  18.933   1
  -3 -10   3 283.568  29.583   4
   2  10  -3 19.2310  4.2176   1
  -2 -10   3 22.4275  5.6201   4
  -2 -10   3 28.4896  4.3218   1
  -2 -10   3 22.0982  4.5261   5
   1  10  -3 1018.53   53.57   1
  -1 -10   3 1266.38   70.81   1
  -1 -10   3 1230.75  110.27   4
  -1 -10   3 1109.79   83.10   5
   0  10  -3 2.27509 3.19335   1
   0 -10   3 -0.1501  2.4158   4
   0 -10   3 -4.5833  3.1155   1
   0 -10   3 0.92667 3.13963   5
   0 -10   3 -0.0888  1.5956   2
  -1  10  -3 70.0666  7.0884   1
   1 -10   3 63.6338 10.1491   4
   1 -10   3 68.9969  7.1849   5
   1 -10   3 59.2742  5.8472   2
  -2  10  -3 5.14724 3.56965   1
   2 -10   3 9.84893 3.37544   5
   2 -10   3 12.0633  3.5354   1
   2 -10   3 6.48385 2.69230   2
   2 -10   3 4.13094 2.78270   4
   2 -10   3 8.54344 2.16686   3
  -3  10  -3 6.35630 4.22037   1
   3 -10   3 8.29230 4.05893   5
   3 -10   3 -1.9145  2.7907   4
   3 -10   3 4.56754 3.38144   1
   3 -10   3 -1.7224  2.7644   2
   3 -10   3 -0.0917  2.1649   3
  -4  10  -3 115.968  12.787   1
   4 -10   3 121.159  12.093   1
   4 -10   3 101.682  13.122   4
   4 -10   3 107.695  11.055   2
   4 -10   3 105.635  11.504   5
   5 -10   3 70.8502  9.2729   5
   5 -10   3 70.1064  8.9497   2
   5 -10   3 77.3834  9.9571   1
   6 -10   3 -0.7693  3.7436   2
   6 -10   3 2.49708 5.08940   1
   6 -10   3 3.42606 5.00579   5
   7 -10   3 -5.0807  5.8252   2
   7 -10   3 -0.0900  4.4494   1
   7 -10   3 6.50010 5.86753   5
   8 -10   3 37.1713  8.7740   2
   8 -10   3 50.7502  9.6882   5
   8 -10   3 30.3350  6.4631   1
   9 -10   3 154.489  21.206   5
   9 -10   3 165.468  25.081   2
   9   9  -3 -0.1333  4.4709   1
   9   9  -3 0.29775 5.56341   3
  -9  -9   3 6.98145 8.16815   4
   8   9  -3 150.263  12.902   1
   8   9  -3 160.142  22.001   3
  -8  -9   3 162.698  22.631   4
   7   9  -3 -0.3453  4.7383   1
   7   9  -3 9.90589 5.86103   3
  -7  -9   3 5.72509 6.63391   4
   6   9  -3 979.687  62.712   1
   6   9  -3 1036.81   95.22   3
  -6  -9   3 943.978  76.499   4
   5   9  -3 20.0762  4.6838   1
  -5  -9   3 19.3426  5.3559   1
  -5  -9   3 4.69267 5.52035   4
   4   9  -3 40.4060  5.1010   1
  -4  -9   3 52.9829  8.7801   4
  -4  -9   3 39.1051  7.4074   1
   3   9  -3 48.7735  6.0848   1
  -3  -9   3 39.6918  4.9632   1
  -3  -9   3 37.7450  5.0217   5
  -3  -9   3 36.4415  5.9477   4
   2   9  -3 -0.7989  3.4778   1
  -2  -9   3 6.34523 2.85823   5
  -2  -9   3 10.2429  3.6489   4
  -2  -9   3 4.76970 3.39831   1
   1   9  -3 -0.5416  3.1680   1
  -1  -9   3 1.70220 1.97347   5
  -1  -9   3 3.35593 3.63506   1
  -1  -9   3 9.01757 3.70243   4
  -1  -9   3 -0.1220  2.0406   3
   0   9  -3 355.680  20.817   1
   0  -9   3 312.571  34.576   2
   0  -9   3 338.750  32.348   5
   0  -9   3 341.666  31.155   4
   0  -9   3 344.406  25.754   1
   0  -9   3 279.539  16.000   3
  -1   9  -3 5.90036 3.64137   1
   1  -9   3 7.57538 2.58880   4
   1  -9   3 8.96585 2.87833   5
   1  -9   3 9.95537 3.75113   1
   1  -9   3 9.94500 2.50497   2
  -2   9  -3 120.254  11.432   1
   2  -9   3 104.510   8.452   2
   2  -9   3 113.640  11.767   4
   2  -9   3 108.970  12.488   5
   2  -9   3 121.407   8.722   3
   2  -9   3 119.704  10.374   1
  -3   9  -3 182.165  16.058   1
   3  -9   3 184.732  12.386   1
   3  -9   3 185.309  14.428   4
   3  -9   3 161.431  14.195   5
   3  -9   3 173.683  13.556   3
   3  -9   3 180.151  11.096   2
  -4   9  -3 79.3765  7.7850   1
   4  -9   3 92.5850  7.7442   1
   4  -9   3 63.8873  8.7297   2
   4  -9   3 83.2153  9.1652   5
   4  -9   3 87.0164  8.5458   3
   4  -9   3 78.8915  8.6859   4
   5  -9   3 44.2904  6.2456   3
   5  -9   3 50.3202  8.1044   5
   5  -9   3 46.5207  6.5562   2
   5  -9   3 38.0304  5.7994   1
   6  -9   3 112.225  10.706   3
   6  -9   3 109.545  10.715   2
   6  -9   3 111.062  12.003   1
   6  -9   3 82.2679 10.4870   5
   7  -9   3 66.6870  8.5699   1
   7  -9   3 71.8847 10.2552   2
   7  -9   3 68.9742  7.1702   3
   7  -9   3 87.1393 11.2955   5
   8  -9   3 27.2220  7.3097   5
   8  -9   3 18.1755  5.3505   3
   8  -9   3 13.6444  5.0912   1
   8  -9   3 15.3173  7.4144   2
  -9   9  -3 32.1655  9.6987   7
   9  -9   3 13.2906  7.2159   5
   9  -9   3 29.9750  7.5404   2
  10   8  -3 1.54773 7.44391   3
 -10  -8   3 21.0350  9.0686   4
   9   8  -3 22.0605  7.6923   3
   9   8  -3 13.0422  5.5560   1
  -9  -8   3 22.1032  8.6232   4
   8   8  -3 9.83252 5.52743   3
   8   8  -3 15.0585  4.5163   1
  -8  -8   3 6.19675 7.76254   4
   7   8  -3 145.346  14.991   3
   7   8  -3 137.350  11.561   1
  -7  -8   3 117.067  13.465   4
   6   8  -3 2.71680 4.39715   1
   6   8  -3 -1.5179  4.1256   3
  -6  -8   3 2.92340 6.26979   4
   5   8  -3 223.534  19.419   3
   5   8  -3 266.416  30.031   1
  -5  -8   3 226.839  16.458   1
  -5  -8   3 194.460  18.640   4
  -4  -8   3 12.0397  4.1572   4
  -4  -8   3 11.1572  3.6895   1
   3   8  -3 225.818  10.408   1
  -3  -8   3 240.906  17.753   1
  -3  -8   3 211.929  16.515   4
   2   8  -3 1.39737 2.84802   1
  -2  -8   3 -2.2243  1.9790   5
  -2  -8   3 1.64573 3.16262   1
  -2  -8   3 1.94073 1.69520   3
  -2  -8   3 1.65363 2.58822   4
   1   8  -3 215.292  12.826   1
  -1  -8   3 187.183  11.153   3
  -1  -8   3 201.368  11.248   1
  -1  -8   3 193.062  18.433   5
  -1  -8   3 197.570  16.666   4
   0   8  -3 3.66978 2.66893   1
   0  -8   3 1.32712 2.16608   5
   0  -8   3 2.74328 2.49864   1
   0  -8   3 -0.6992  1.8722   4
   0  -8   3 3.91071 1.45791   3
   0  -8   3 0.62730 1.39683   2
  -1   8  -3 78.4522  6.9667   1
   1  -8   3 61.3550  6.0554   1
   1  -8   3 72.6974  7.2348   4
   1  -8   3 71.0846  5.3190   2
   1  -8   3 66.5860  6.5101   5
  -2   8  -3 131.193   8.306   1
   2  -8   3 137.894  10.163   4
   2  -8   3 142.665   9.072   2
   2  -8   3 131.720  10.320   1
   2  -8   3 137.957   8.946   3
   2  -8   3 133.507  11.515   5
  -3   8  -3 247.025  15.722   1
   3  -8   3 276.233  19.555   1
   3  -8   3 254.523  20.686   2
   3  -8   3 249.750  18.585   3
   3  -8   3 235.620  19.700   5
   3  -8   3 257.278  24.408   4
  -4   8  -3 42.9403  5.7329   1
   4  -8   3 47.4739  4.9647   3
   4  -8   3 45.2240  6.5904   5
   4  -8   3 47.3325  5.5976   2
   4  -8   3 47.6398  4.2463   1
   4  -8   3 38.5785  4.7537   4
  -5   8  -3 182.765  23.109   1
   5  -8   3 191.542  15.363   5
   5  -8   3 227.451  16.068   3
   5  -8   3 198.781  16.286   2
   5  -8   3 215.258  20.473   1
   6  -8   3 5.71221 2.88243   1
   6  -8   3 3.45208 3.77120   5
   6  -8   3 3.98884 4.17269   3
   6  -8   3 -3.0696  4.4880   2
   7  -8   3 96.2170 10.1278   3
   7  -8   3 77.9098  8.5463   1
   7  -8   3 102.911  12.114   5
   7  -8   3 106.718   8.823   2
   8  -8   3 1.55469 5.34200   2
   8  -8   3 -5.2924  6.3558   5
   8  -8   3 4.09493 4.44930   1
   8  -8   3 3.32990 4.48483   3
  -9   8  -3 59.5883 11.4616   7
   9  -8   3 65.5869 10.4787   3
   9  -8   3 45.8568  8.1715   2
   9  -8   3 57.0817 11.0619   5
 -10   8  -3 52.6103 10.7245   7
  10  -8   3 45.3277  7.6744   3
  10  -8   3 37.1834  9.0693   2
  10  -8   3 51.3537  9.3206   5
  10   7  -3 11.4130  8.3043   3
 -10  -7   3 -4.7290  8.2177   4
   9   7  -3 7.70381 5.26150   1
   9   7  -3 5.38852 5.64876   3
  -9  -7   3 16.4910  9.3441   4
   8   7  -3 3.52725 4.42256   1
   8   7  -3 1.45914 4.36335   3
  -8  -7   3 1.87022 5.96540   4
   7   7  -3 15.7916  4.9569   3
   7   7  -3 22.0967  3.9999   1
  -7  -7   3 18.6374  4.6080   4
   6   7  -3 108.642   9.478   3
   6   7  -3 131.321   8.897   1
  -6  -7   3 103.830  10.047   4
  -6  -7   3 117.297  10.361   1
   5   7  -3 160.353  15.699   3
   5   7  -3 164.544  10.053   1
  -5  -7   3 185.749  13.254   1
  -5  -7   3 182.519  21.135   4
   4   7  -3 5.79246 3.38207   1
   4   7  -3 2.90326 2.65465   3
  -4  -7   3 4.40552 3.07852   1
  -4  -7   3 13.0824  3.5604   4
   3   7  -3 23.6516  4.1195   1
  -3  -7   3 32.8048  4.8967   4
  -3  -7   3 37.9493  5.0318   1
   2   7  -3 29.0866  4.0373   1
  -2  -7   3 29.2183  3.3680   4
  -2  -7   3 31.1586  5.2946   5
  -2  -7   3 27.3764  3.4588   3
   1   7  -3 5.55748 2.64190   1
  -1  -7   3 8.42725 2.34429   4
  -1  -7   3 14.1306  3.5948   1
  -1  -7   3 8.29787 1.99095   5
  -1  -7   3 5.57410 1.98309   3
   0   7  -3 996.537  91.460   4
   0   7  -3 1026.29   34.77   1
   0  -7   3 991.505  41.548   1
   0  -7   3 1030.07   90.63   5
   0  -7   3 984.430  48.686   3
   0  -7   3 985.219  68.312   4
   0  -7   3 996.747  75.847   2
  -1   7  -3 -0.3097  1.5232   4
  -1   7  -3 -0.2957  2.4332   1
   1  -7   3 1.49004 3.06481   1
   1  -7   3 -0.2679  1.4738   4
   1  -7   3 1.80362 1.57990   2
   1  -7   3 1.85569 2.79707   5
  -2   7  -3 3820.50  140.33   1
   2  -7   3 3449.41  200.68   2
   2  -7   3 3812.72  317.29   4
   2  -7   3 3784.83  238.23   1
   2  -7   3 3533.46  188.51   3
   2  -7   3 3908.67  249.35   5
  -3   7  -3 22.6415  3.2225   1
   3  -7   3 22.7020  3.2123   4
   3  -7   3 19.8376  2.5928   3
   3  -7   3 23.9384  3.4547   5
   3  -7   3 20.3608  2.9801   1
  -4   7  -3 94.6663  7.7431   1
   4  -7   3 94.0391 12.1411   5
   4  -7   3 76.2736  7.3559   1
   4  -7   3 79.4719  7.4280   2
   4  -7   3 109.236   8.021   3
  -5   7  -3 6.72371 3.10046   1
   5  -7   3 10.5749  3.3934   1
   5  -7   3 5.76623 2.93141   3
   5  -7   3 9.30973 4.01578   2
   5  -7   3 5.54125 3.58169   5
   6  -7   3 399.773  39.136   2
   6  -7   3 395.366  32.401   5
   6  -7   3 410.017  34.847   3
   6  -7   3 335.596  23.518   1
   7  -7   3 6.74646 4.13904   3
   7  -7   3 -3.1200  4.4904   5
   7  -7   3 6.43795 3.73762   1
   7  -7   3 15.7708  5.6367   2
   8  -7   3 188.622  17.020   5
   8  -7   3 178.101  15.269   3
   8  -7   3 159.683  16.934   2
   8  -7   3 171.738  17.944   1
  -9   7  -3 0.00000 5.67877   7
   9  -7   3 11.5560  6.0277   2
   9  -7   3 3.81637 5.62488   3
   9  -7   3 4.42152 5.78544   5
 -10   7  -3 -0.6334  8.6136   7
  10  -7   3 -0.4405  6.5936   3
  10  -7   3 8.64652 6.50905   2
  10  -7   3 1.59678 5.10218   5
  10   6  -3 20.7531  7.4619   3
 -10  -6   3 43.1611 11.8485   4
   9   6  -3 15.0193  6.3824   3
   9   6  -3 4.92670 4.53766   1
  -9  -6   3 25.9425  7.4877   4
   8   6  -3 4.05131 3.28068   1
   8   6  -3 12.2414  5.2858   3
  -8  -6   3 3.64952 7.23763   4
   7   6  -3 11.8203  5.1162   3
   7   6  -3 12.7514  2.9749   1
  -7  -6   3 18.9298  5.2353   4
   6   6  -3 39.9663  5.3326   3
   6   6  -3 50.8859  4.9557   1
  -6  -6   3 31.8666  4.7144   1
  -6  -6   3 42.2852  5.7666   4
   5   6  -3 2.88519 2.82316   3
   5   6  -3 0.56025 2.56275   1
  -5  -6   3 0.22223 3.31079   4
  -5  -6   3 -0.0949  2.7438   1
   4   6  -3 51.7763  4.4541   3
   4   6  -3 53.9817  4.8298   1
  -4  -6   3 42.3013  5.1093   1
  -4  -6   3 62.4463  6.7310   4
   3   6  -3 -0.5224  1.8630   3
   3   6  -3 -0.8662  2.3207   1
  -3  -6   3 1.52663 2.47634   1
  -3  -6   3 -0.7495  2.9251   4
   2   6  -3 60.8532  4.7858   1
  -2  -6   3 61.9165  4.8850   3
  -2  -6   3 66.5449  5.6599   4
  -2  -6   3 74.2895  6.9465   1
   1   6  -3 2180.30   87.86   1
  -1  -6   3 2246.07   99.88   3
  -1  -6   3 2236.91  119.36   1
  -1  -6   3 2306.79  242.76   5
  -1  -6   3 2127.35  126.26   4
   0   6  -3 7.37819 2.62452   1
   0  -6   3 3.47083 1.28047   3
   0  -6   3 4.72939 2.55528   1
   0  -6   3 7.47010 2.09099   4
   0  -6   3 5.93671 2.74115   5
  -1   6  -3 142.243   7.978   1
  -1   6  -3 140.014   9.705   4
   1  -6   3 153.018   9.335   5
   1  -6   3 185.879  14.809   4
   1  -6   3 164.863   9.150   1
   1  -6   3 138.830   8.012   2
  -2   6  -3 190.974   8.732   1
  -2   6  -3 155.444  13.223   4
   2  -6   3 187.275  14.931   2
   2  -6   3 163.882   8.368   3
   2  -6   3 192.891  15.990   5
   2  -6   3 183.684  10.227   1
   2  -6   3 184.282  13.631   4
  -3   6  -3 42.9628  3.7482   1
  -3   6  -3 34.3584  4.5208   4
   3  -6   3 33.4112  3.8132   1
   3  -6   3 31.7314  4.0340   1
   3  -6   3 36.7148  3.4148   2
   3  -6   3 38.8473  3.1746   3
   3  -6   3 40.0053  6.0750   4
   3  -6   3 37.9387  4.3133   5
  -4   6  -3 22.3890  3.0217   1
  -4   6  -3 19.5046  3.1207   4
   4  -6   3 22.8729  3.7484   2
   4  -6   3 25.6275  6.0394   5
   4  -6   3 25.3407  3.2397   1
   4  -6   3 18.0115  3.4038   1
   4  -6   3 25.4953  3.1154   3
  -5   6  -3 -1.8171  2.4196   1
   5  -6   3 -1.8676  2.7667   5
   5  -6   3 2.15344 2.46164   1
   5  -6   3 1.37669 2.12295   6
   5  -6   3 2.26656 2.71864   3
   5  -6   3 1.90665 2.45868   1
   5  -6   3 5.72784 2.92496   2
   6  -6   3 7.05651 3.01224   1
   6  -6   3 12.2912  4.2420   5
   6  -6   3 2.11585 3.67788   3
   7  -6   3 21.4824  5.2309   3
   7  -6   3 31.4682  4.5599   1
   7  -6   3 27.5781  7.2377   5
   7  -6   3 28.5410  5.1415   2
  -8   6  -3 14.9594  6.0065   7
   8  -6   3 16.7457  3.2388   1
   8  -6   3 28.7247  6.7542   3
   8  -6   3 28.5522  6.6922   2
   8  -6   3 19.3678  6.4129   5
  -9   6  -3 101.757  16.765   7
   9  -6   3 119.635  12.723   2
   9  -6   3 86.4754 11.5078   3
   9  -6   3 99.7428 10.0063   5
 -10   6  -3 -0.6381  7.1921   7
  10  -6   3 -3.5673  3.9460   2
  10  -6   3 -1.1615  5.7226   3
  10  -6   3 -5.1068  6.0116   5
  11   5  -3 13.1683  8.0902   3
 -11  -5   3 1.58577 8.76450   7
 -11  -5   3 7.66800 8.43793   4
  10   5  -3 57.0801 10.0729   3
 -10  -5   3 49.8439  7.7159   4
 -10  -5   3 54.2784  8.9706   7
   9   5  -3 29.1525  8.2520   3
   9   5  -3 18.5123  4.1309   1
  -9  -5   3 18.7530  6.9730   7
  -9  -5   3 16.8020  5.7720   4
   8   5  -3 164.506  10.825   1
   8   5  -3 154.380  15.468   3
  -8  -5   3 187.095  16.003   4
  -8  -5   3 157.930  15.255   7
   7   5  -3 203.761  11.240   1
   7   5  -3 191.014  18.597   3
  -7  -5   3 204.078  16.708   4
  -7  -5   3 183.770  16.812   7
   6   5  -3 87.9238  5.9066   3
   6   5  -3 106.391   6.184   1
  -6  -5   3 100.620  10.111   4
  -6  -5   3 82.3718  8.2519   1
   5   5  -3 40.6136  3.4267   1
   5   5  -3 35.6747  4.8212   1
   5   5  -3 35.7524  3.8944   3
   5   5  -3 20.4006  4.9562   8
  -5  -5   3 34.9395  4.1120   1
  -5  -5   3 34.2475  5.6409   4
   4   5  -3 20.7359  2.9973   3
   4   5  -3 28.2740  4.0482   1
   4   5  -3 25.1143  4.1634   8
  -4  -5   3 22.9076  2.9802   1
  -4  -5   3 20.6229  3.6342   4
   3   5  -3 43.9622  4.2860   1
   3   5  -3 49.5119  3.7683   3
  -3  -5   3 39.6904  4.3465   1
  -3  -5   3 54.7863  5.5482   4
   2   5  -3 1539.89   84.55   3
   2   5  -3 1494.35   54.32   1
  -2  -5   3 1467.73   64.67   1
  -2  -5   3 1549.78   95.07   3
  -2  -5   3 1543.39  143.83   4
   1   5  -3 -0.8552  1.1278   4
   1   5  -3 0.20340 1.93825   1
  -1  -5   3 5.32405 2.33707   1
  -1  -5   3 0.83804 1.73807   4
  -1  -5   3 -1.1368  1.4753   5
  -1  -5   3 0.22328 1.24756   3
   0   5  -3 492.139  17.718   1
   0   5  -3 466.105  25.697   4
   0  -5   3 498.878  23.235   3
   0  -5   3 562.391  54.430   5
   0  -5   3 508.396  48.112   4
   0  -5   3 517.479  27.313   1
  -1   5  -3 3.17276 1.84125   1
  -1   5  -3 0.78336 1.30452   4
   1  -5   3 -0.3301  0.8890   3
   1  -5   3 0.72920 2.21593   5
   1  -5   3 -0.1738  1.4015   2
   1  -5   3 3.77414 1.98466   1
   1  -5   3 -0.3755  1.4319   4
  -2   5  -3 1120.34   41.80   1
  -2   5  -3 1055.25   82.82   4
   2  -5   3 1018.24   61.55   2
   2  -5   3 1087.44   49.49   5
   2  -5   3 1142.59   68.76   1
   2  -5   3 1049.54   46.02   3
   2  -5   3 1119.65   81.07   4
   2  -5   3 1089.19   53.22   1
  -3   5  -3 150.392   8.896   1
  -3   5  -3 127.412  11.178   4
   3  -5   3 145.466  13.851   5
   3  -5   3 131.400   8.952   1
   3  -5   3 126.110   6.889   1
   3  -5   3 143.753  11.713   2
   3  -5   3 145.067  11.532   4
   3  -5   3 162.040   6.961   3
  -4   5  -3 392.776  37.790   4
  -4   5  -3 431.021  26.952   1
   4  -5   3 440.789  45.548   5
   4  -5   3 377.273  26.163   6
   4  -5   3 410.525  16.957   3
   4  -5   3 380.046  30.286   1
   4  -5   3 417.222  28.556   1
   4  -5   3 443.044  45.870   2
  -5   5  -3 18.9197  3.1095   1
   5  -5   3 26.5795  3.9574   3
   5  -5   3 26.1637  4.2534   5
   5  -5   3 19.2123  3.0452   1
   5  -5   3 25.2659  3.7561   2
   5  -5   3 20.8676  2.6650   6
   5  -5   3 22.2696  2.6910   1
   6  -5   3 322.410  28.940   1
   6  -5   3 354.977  30.652   3
   6  -5   3 318.915  25.980   2
   6  -5   3 346.251  17.120   5
   7  -5   3 -2.3725  3.9033   3
   7  -5   3 -5.8501  2.9431   2
   7  -5   3 0.50576 4.44560   5
   7  -5   3 -0.3910  2.0610   1
  -8   5  -3 83.5323  9.3917   7
   8  -5   3 63.9979  8.9150   5
   8  -5   3 56.7817  8.8048   2
   8  -5   3 68.0653  8.5890   3
   8  -5   3 58.9866  5.6604   1
  -9   5  -3 173.695  15.753   7
  -9   5  -3 130.575  13.437   4
   9  -5   3 146.942  15.483   2
   9  -5   3 141.029  13.782   3
   9  -5   3 167.601  16.378   5
 -10   5  -3 33.9230  8.3843   7
  10  -5   3 49.9464  8.3452   5
  10  -5   3 42.1446  9.4298   2
  10  -5   3 42.4231  8.8041   3
 -11   5  -3 4.58881 8.19829   7
  11  -5   3 -0.4907  5.0062   5
  11  -5   3 -7.4872  6.9804   2
  11  -5   3 -7.6723  6.6247   3
  11   4  -3 9.48719 8.20615   3
 -11  -4   3 4.07078 8.26185   4
 -11  -4   3 -5.7919  8.1416   7
  10   4  -3 128.320  16.063   3
 -10  -4   3 158.759  16.474   4
 -10  -4   3 145.664  18.093   7
   9   4  -3 62.9363  5.3599   1
   9   4  -3 87.9389 10.2512   3
  -9  -4   3 64.7197  9.3352   7
  -9  -4   3 75.2597 10.0063   4
   8   4  -3 8.53922 3.52085   1
   8   4  -3 15.0307  4.3710   3
  -8  -4   3 1.10866 5.21520   4
  -8  -4   3 18.5803  5.7526   7
   7   4  -3 270.165  15.620   1
   7   4  -3 303.493  19.042   3
  -7  -4   3 296.059  21.617   7
  -7  -4   3 263.286  17.687   4
   6   4  -3 3.81018 3.03403   3
   6   4  -3 8.06779 2.55128   1
  -6  -4   3 6.20259 4.34737   7
  -6  -4   3 6.27360 3.59159   4
  -6  -4   3 6.84071 2.73060   1
   5   4  -3 -1.0068  2.8976   3
   5   4  -3 0.24167 1.91671   1
   5   4  -3 -3.0964  1.8494   8
   5   4  -3 6.04449 2.32534   1
  -5  -4   3 0.99410 2.13340   1
  -5  -4   3 1.02984 2.71806   4
  -5  -4   3 -0.3668  2.9778   7
   4   4  -3 12.0437  2.5994   1
   4   4  -3 18.4293  3.1349   3
   4   4  -3 13.5175  2.1870   8
   4   4  -3 12.5247  2.6414   1
  -4  -4   3 16.7538  2.9164   1
  -4  -4   3 17.4470  3.4997   4
   3   4  -3 780.613  51.526   3
   3   4  -3 869.681  40.492   1
   3   4  -3 836.938  41.472   1
   3   4  -3 994.919 120.207   8
  -3  -4   3 883.732  59.478   4
  -3  -4   3 881.373  33.094   1
   2   4  -3 0.06804 1.95601   1
   2   4  -3 0.85573 1.93851   1
   2   4  -3 0.83334 1.78261   3
  -2  -4   3 1.43173 1.80949   3
  -2  -4   3 -0.8305  1.8160   1
   1   4  -3 12.9242  2.2134   1
   1   4  -3 10.4815  1.6463   4
   1   4  -3 15.0368  1.5768   3
   1   4  -3 14.9073  2.2381   1
  -1  -4   3 11.9776  1.5846   3
  -1  -4   3 17.8489  2.4546   1
  -1  -4   3 9.99870 2.03011   4
   0   4  -3 82.1049  4.9347   1
   0   4  -3 79.6825  5.1855   4
   0   4  -3 83.2964  8.1345   1
   0  -4   3 79.4712  7.5658   1
   0  -4   3 84.2928  7.9996   5
   0  -4   3 83.0509  5.0039   1
   0  -4   3 80.4146  6.9738   4
   0  -4   3 86.7662  4.1391   3
  -1   4  -3 596.302  25.857   1
  -1   4  -3 562.281  49.091   5
  -1   4  -3 562.403  35.669   4
   1  -4   3 641.480  55.659   5
   1  -4   3 597.543  30.346   1
   1  -4   3 567.661  31.630   1
   1  -4   3 508.592  21.190   3
   1  -4   3 566.682  48.057   2
   1  -4   3 606.829  48.865   4
  -2   4  -3 25.2097  2.5842   1
  -2   4  -3 24.9030  2.0130   4
  -2   4  -3 25.1899  2.0503   2
   2  -4   3 19.3891  2.4270   1
   2  -4   3 20.1808  2.5899   2
   2  -4   3 17.9153  2.2362   4
   2  -4   3 22.8195  2.9216   1
   2  -4   3 15.9423  2.5165   5
   2  -4   3 22.3620  2.0110   3
  -3   4  -3 870.376  58.865   4
  -3   4  -3 864.071  33.048   1
   3  -4   3 863.145  35.375   3
   3  -4   3 884.440  69.124   5
   3  -4   3 781.342  45.670   1
   3  -4   3 828.756  30.637   1
   3  -4   3 884.059  72.298   2
  -4   4  -3 484.771  32.219   4
  -4   4  -3 496.555  19.859   1
   4  -4   3 516.970  35.319   2
   4  -4   3 506.666  33.910   1
   4  -4   3 507.513  26.554   6
   4  -4   3 489.032  51.691   5
   4  -4   3 546.611  35.853   3
   4  -4   3 495.278  30.377   1
  -5   4  -3 387.464  25.301   1
   5  -4   3 387.705  33.551   6
   5  -4   3 380.599  33.204   1
   5  -4   3 416.695  22.971   3
   5  -4   3 390.838  24.789   5
   5  -4   3 393.977  19.332   1
   5  -4   3 380.754  22.256   2
   6  -4   3 20.4580  4.3280   2
   6  -4   3 26.1249  2.6745   1
   6  -4   3 27.8177  4.6844   5
   6  -4   3 33.6102  4.5617   3
   6  -4   3 29.2078  3.1793   1
  -7   4  -3 35.0741  6.0693   7
   7  -4   3 49.5122  6.3076   5
   7  -4   3 39.8354  4.1773   1
   7  -4   3 40.0980  5.0917   2
   7  -4   3 42.3401  5.9033   3
  -8   4  -3 11.2945  5.8025   7
  -8   4  -3 10.1266  3.4701   4
   8  -4   3 6.30649 4.79286   2
   8  -4   3 2.19692 4.02909   5
   8  -4   3 1.31136 3.52344   3
  -9   4  -3 254.875  22.715   4
  -9   4  -3 329.318  23.977   7
   9  -4   3 280.290  25.313   3
   9  -4   3 259.233  20.341   2
   9  -4   3 296.535  27.042   5
 -10   4  -3 33.8929  8.7879   7
  10  -4   3 30.1441  7.7636   2
  10  -4   3 25.5367  7.5022   5
  10  -4   3 28.7880  6.9673   3
 -11   4  -3 -5.6690  7.5681   7
  11  -4   3 0.41791 5.10318   5
  11  -4   3 0.04870 6.77062   2
  11  -4   3 -1.2638  6.2305   3
  11   3  -3 2.19275 6.96858   3
 -11  -3   3 11.6533  9.2403   7
 -11  -3   3 0.66095 7.83962   4
  10   3  -3 5.06842 5.43955   3
 -10  -3   3 17.8027  8.5258   7
 -10  -3   3 8.60828 7.91175   4
   9   3  -3 14.9453  6.6015   3
   9   3  -3 9.65667 2.86397   1
  -9  -3   3 15.5275  5.5556   7
  -9  -3   3 11.3021  6.8619   4
   8   3  -3 75.1803  9.9293   3
   8   3  -3 79.5989  5.8385   1
  -8  -3   3 84.1083  9.2400   7
   7   3  -3 0.31877 2.94955   3
  -7  -3   3 9.35298 4.49045   4
  -7  -3   3 6.87910 4.66240   7
   6   3  -3 770.075  30.731   3
   6   3  -3 759.169  52.984   1
   6   3  -3 731.999  29.415   1
  -6  -3   3 758.952  47.569   7
  -6  -3   3 769.373  37.089   4
  -6  -3   3 735.147  39.470   1
   5   3  -3 58.0414  4.4338   1
   5   3  -3 67.3456  5.3566   3
   5   3  -3 57.9558  5.9099   1
  -5  -3   3 57.7827  4.9682   1
  -5  -3   3 53.0891  4.3622   4
  -5  -3   3 68.5255  7.1088   7
   4   3  -3 34.3639  2.8666   1
   4   3  -3 41.3831  3.6994   1
   4   3  -3 41.8472  4.1222   8
   4   3  -3 42.2882  4.0246   3
  -4  -3   3 43.6942  4.6814   7
  -4  -3   3 36.7162  3.2442   1
  -4  -3   3 42.1839  5.2813   4
   3   3  -3 177.909  10.252   8
   3   3  -3 173.935   8.652   1
   3   3  -3 160.104  10.680   3
   3   3  -3 166.109   8.667   1
  -3  -3   3 179.093  10.891   4
  -3  -3   3 157.440   6.511   1
  -3  -3   3 119.928  14.457   3
   2   3  -3 2006.48  133.84   7
   2   3  -3 1863.95   66.14   1
   2   3  -3 1751.35   64.92   1
   2   3  -3 1757.47   89.63   3
  -2  -3   3 1973.48   97.93   3
  -2  -3   3 1597.44   67.81   4
  -2  -3   3 1789.62   86.53   1
   1   3  -3 2.74137 1.23923   3
   1   3  -3 3.31884 1.99875   1
   1   3  -3 3.89086 1.93020   1
  -1  -3   3 1.31575 1.26208   3
  -1  -3   3 0.48353 1.69606   1
  -1  -3   3 4.77973 1.27611   4
  -1  -3   3 1.73993 2.08934   1
   0   3  -3 3268.06  159.13   4
   0   3  -3 3833.74  146.93   1
   0   3  -3 3609.61  179.85   1
   0  -3   3 3337.62  246.52   4
   0  -3   3 3902.28  206.06   1
   0  -3   3 3597.83  180.86   1
   0  -3   3 3991.14  436.07   5
  -1   3  -3 41.9967  2.8847   1
  -1   3  -3 37.5717  2.7786   4
  -1   3  -3 44.6414  2.9226   1
  -1   3  -3 43.9753  5.3970   5
   1  -3   3 40.0141  2.7903   2
   1  -3   3 46.2857  3.5154   1
   1  -3   3 47.6204  5.5763   5
   1  -3   3 37.9620  1.8355   3
   1  -3   3 45.3987  3.1883   4
   1  -3   3 45.8677  3.4204   1
  -2   3  -3 4956.32  203.37   1
   2  -3   3 5131.91  215.89   1
   2  -3   3 4938.67  253.01   2
   2  -3   3 4774.27  312.89   1
   2  -3   3 5157.89  443.66   5
   2  -3   3 4514.05  202.71   3
  -3   3  -3 19.1714  2.7303   3
  -3   3  -3 18.1529  1.8982   1
  -3   3  -3 22.1219  2.4702   4
   3  -3   3 16.5139  2.4311   3
   3  -3   3 16.1953  2.4364   5
   3  -3   3 19.4336  2.8591   2
   3  -3   3 20.2870  2.5473   1
   3  -3   3 19.7094  2.2172   1
   3  -3   3 17.3778  2.1296   6
  -4   3  -3 96.1670  5.1036   1
  -4   3  -3 115.218  11.882   4
   4  -3   3 113.541   8.653   3
   4  -3   3 104.864   4.976   1
   4  -3   3 105.776   7.121   6
   4  -3   3 97.7465  7.8546   1
   4  -3   3 99.1766  9.4350   2
   4  -3   3 98.5921 10.1103   5
  -5   3  -3 49.3499  3.7743   1
   5  -3   3 51.0237  3.9704   1
   5  -3   3 45.0138  3.9000   6
   5  -3   3 47.2340  6.2473   3
   5  -3   3 56.9134  4.6327   2
   5  -3   3 57.4824  5.4206   5
  -6   3  -3 1292.86   94.34   1
   6  -3   3 1339.56   69.07   1
   6  -3   3 1379.60   71.27   3
   6  -3   3 1399.32   83.60   2
   6  -3   3 1368.34   60.79   5
   6  -3   3 1306.85   62.16   1
  -7   3  -3 3.97277 2.43536   4
  -7   3  -3 5.25550 3.80427   7
   7  -3   3 12.2439  3.6234   5
   7  -3   3 4.38505 3.90635   2
   7  -3   3 4.62696 1.07853   1
   7  -3   3 1.54506 2.67980   3
   7  -3   3 2.83315 0.94452   1
  -8   3  -3 65.1321  7.8340   4
  -8   3  -3 60.6618  7.5888   7
   8  -3   3 54.9372  5.9402   3
   8  -3   3 54.1843  6.8164   2
   8  -3   3 70.0077  7.6912   5
  -9   3  -3 6.31513 5.87655   7
  -9   3  -3 11.1260  5.0219   4
   9  -3   3 8.71164 4.75592   2
   9  -3   3 6.42651 4.56583   3
   9  -3   3 6.32255 4.83566   5
 -10   3  -3 142.334  15.805   4
 -10   3  -3 125.681  14.312   7
  10  -3   3 151.289  15.096   2
  10  -3   3 128.928  16.508   5
  10  -3   3 146.871  17.106   3
 -11   3  -3 7.07696 6.83267   7
  11  -3   3 8.48060 6.83632   3
  11  -3   3 12.1788  6.7624   5
  11  -3   3 21.9717  8.4610   2
  11   2  -3 27.9786  9.8918   3
 -11  -2   3 49.3655 12.2699   7
 -11  -2   3 54.5853 10.6570   4
  10   2  -3 68.6349  9.4064   3
 -10  -2   3 63.8380  8.5151   4
 -10  -2   3 75.8609  9.9720   7
   9   2  -3 14.7241  6.0249   3
  -9  -2   3 16.2809  6.4782   4
  -9  -2   3 6.31798 5.80667   7
   8   2  -3 483.508  24.536   1
   8   2  -3 542.379  27.570   3
  -8  -2   3 473.512  33.012   8
  -8  -2   3 593.921  31.187   4
  -8  -2   3 531.279  41.086   7
   7   2  -3 161.695   9.227   1
   7   2  -3 194.020  11.618   3
  -7  -2   3 183.751  12.776   8
  -7  -2   3 167.114  15.817   7
  -7  -2   3 185.479  14.152   4
   6   2  -3 214.510  12.638   3
   6   2  -3 178.619  10.782   1
   6   2  -3 196.685  18.633   1
  -6  -2   3 199.635  13.530   7
  -6  -2   3 182.126  10.524   4
  -6  -2   3 185.163  12.441   8
  -6  -2   3 172.988  13.620   1
   5   2  -3 59.8014  4.6447   1
   5   2  -3 40.8847  2.9914   1
   5   2  -3 58.2771  6.7289   3
  -5  -2   3 50.0417  4.7325   7
  -5  -2   3 43.0317  5.6031   4
  -5  -2   3 43.3935  3.6620   1
  -5  -2   3 48.5511  4.7766   8
   4   2  -3 62.9930  5.8656   3
   4   2  -3 60.3139  3.6403   1
   4   2  -3 69.1015  4.8771   1
  -4  -2   3 67.8283  4.8919   8
  -4  -2   3 65.5717  5.5332   4
  -4  -2   3 65.8730  5.1358   7
  -4  -2   3 63.9506  4.2091   1
   3   2  -3 509.237  19.502   1
   3   2  -3 549.013  26.189   8
   3   2  -3 546.831  29.681   3
   3   2  -3 555.191  23.852   1
  -3  -2   3 559.379  46.999   7
  -3  -2   3 547.331  36.897   3
  -3  -2   3 548.675  29.344   1
  -3  -2   3 556.063  32.143   2
   2   2  -3 1.88235 1.38386   1
   2   2  -3 6.88142 1.88923   7
   2   2  -3 6.29494 1.93179   1
   2   2  -3 5.55163 1.74030   8
   2   2  -3 3.75811 1.67081   3
  -2  -2   3 5.81180 1.71038   1
  -2  -2   3 5.49416 1.80325   3
  -2  -2   3 3.51097 1.84288   1
   1   2  -3 135.701   5.952   1
   1   2  -3 130.790   6.770   1
   1   2  -3 129.712   5.925   3
  -1  -2   3 128.842   6.194   3
  -1  -2   3 128.269   7.494   4
  -1  -2   3 126.721   7.625   1
  -1  -2   3 133.771   9.323   1
   0   2  -3 18.8958  1.1489   3
   0   2  -3 21.3028  2.3018   1
   0   2  -3 23.5673  2.4497   1
   0  -2   3 17.0051  1.4749   4
   0  -2   3 23.8146  2.3894   5
   0  -2   3 22.1409  2.1184   1
   0  -2   3 23.7202  2.1800   1
  -1   2  -3 24.3215  1.3942   4
  -1   2  -3 28.4903  2.4403   1
  -1   2  -3 29.3738  2.1942   1
  -1   2  -3 22.9214  1.5276   3
  -1   2  -3 21.5686  3.9674   5
   1  -2   3 22.6625  1.6771   3
   1  -2   3 26.7979  2.3021   2
   1  -2   3 23.5455  2.3750   1
   1  -2   3 25.6148  2.2572   1
   1  -2   3 29.2241  3.0836   5
  -2   2  -3 23.2289  2.7125   4
  -2   2  -3 20.0170  1.8179   1
  -2   2  -3 20.3291  2.1318   3
  -2   2  -3 16.7996  2.4260   5
  -2   2  -3 16.9938  2.4272   2
   2  -2   3 24.4810  2.7907   5
   2  -2   3 20.8141  2.8281   2
   2  -2   3 20.8203  2.1577   1
   2  -2   3 17.2474  1.7252   1
   2  -2   3 17.5901  1.8564   3
  -3   2  -3 412.332  19.323   1
  -3   2  -3 416.591  28.803   3
  -3   2  -3 386.397  15.098   1
   3  -2   3 413.119  16.666   1
   3  -2   3 431.888  24.828   3
   3  -2   3 409.945  20.078   2
   3  -2   3 385.612  25.715   1
   3  -2   3 408.117  22.238   6
   3  -2   3 424.308  25.538   5
  -4   2  -3 1019.99   60.06   1
  -4   2  -3 989.758  39.745   1
   4  -2   3 1103.71   47.26   3
   4  -2   3 980.665  82.596   2
   4  -2   3 1091.08   49.31   5
   4  -2   3 969.287  50.628   1
   4  -2   3 1054.78   46.93   6
  -5   2  -3 102.976   4.921   1
  -5   2  -3 88.4158  5.4718   1
  -5   2  -3 99.2022  5.4401   6
   5  -2   3 104.554   7.445   5
   5  -2   3 93.7006  4.4200   1
   5  -2   3 103.388   5.489   1
   5  -2   3 106.537   7.837   2
   5  -2   3 93.3520  6.0814   3
  -6   2  -3 114.394   8.750   7
  -6   2  -3 125.207   7.530   6
  -6   2  -3 126.524   8.345   4
   6  -2   3 122.367   7.932   5
   6  -2   3 148.114   9.008   3
   6  -2   3 137.283   7.420   2
  -7   2  -3 66.5883  6.5433   4
  -7   2  -3 70.7649  5.9510   7
  -7   2  -3 68.4920  5.2341   6
   7  -2   3 68.1445  7.9558   5
   7  -2   3 73.8709  7.2751   2
  -8   2  -3 80.4201  8.2529   7
   8  -2   3 78.9183  7.2412   3
   8  -2   3 72.7982  7.9880   2
   8  -2   3 75.7101  7.6562   5
  -9   2  -3 39.4116  7.1486   4
  -9   2  -3 50.3877  8.4197   7
   9  -2   3 38.3884  6.2534   3
   9  -2   3 36.3741  6.6398   2
   9  -2   3 49.5958  6.5240   5
 -10   2  -3 35.5093  7.0699   7
 -10   2  -3 29.8062  7.0729   4
  10  -2   3 33.0892  7.4172   3
  10  -2   3 15.3142  7.5466   2
  10  -2   3 48.0360  8.3201   5
 -11   2  -3 12.7960  6.6126   7
 -11   2  -3 30.4715  9.7459   4
  11  -2   3 29.5444  7.9813   5
  11  -2   3 23.4022  7.4953   3
  11  -2   3 23.5166  7.0719   2
  11   1  -3 42.0323  9.3162   3
 -11  -1   3 51.0939  9.8959   7
 -11  -1   3 49.0050  9.9751   4
  10   1  -3 95.5281 11.6935   3
 -10  -1   3 95.9538 12.7920   7
 -10  -1   3 99.7123 11.7376   4
   9   1  -3 54.2331  8.6975   3
  -9  -1   3 53.0914  8.3083   7
  -9  -1   3 50.6734  7.3260   4
   8   1  -3 -1.2430  3.7278   3
   8   1  -3 0.08987 1.88526   1
  -8  -1   3 -3.7132  4.2887   7
  -8  -1   3 5.25261 5.28914   4
  -8  -1   3 0.33130 2.50561   8
   7   1  -3 183.504  10.963   1
   7   1  -3 200.010  18.243   3
  -7  -1   3 199.502  10.784   4
  -7  -1   3 200.476  14.182   7
  -7  -1   3 184.519  13.333   8
   6   1  -3 619.357  45.055   1
   6   1  -3 637.577  37.272   3
   6   1  -3 579.905  38.683   1
  -6  -1   3 640.591  43.194   7
  -6  -1   3 642.822  30.811   8
  -6  -1   3 586.733  28.472   1
   5   1  -3 312.105  18.843   3
   5   1  -3 331.949  16.879   1
   5   1  -3 276.773  17.256   1
  -5  -1   3 327.290  18.695   8
  -5  -1   3 345.033  21.639   7
  -5  -1   3 327.831  12.982   1
   4   1  -3 31.4254  2.7803   1
   4   1  -3 31.1744  2.7550   1
   4   1  -3 33.1477  3.8829   3
  -4  -1   3 39.2553  4.2478   8
  -4  -1   3 34.3004  3.3552   7
  -4  -1   3 31.9716  3.0663   1
   3   1  -3 400.578  19.970   1
   3   1  -3 387.719  16.871   8
   3   1  -3 410.375  25.672   3
   3   1  -3 335.839  16.432   1
  -3  -1   3 384.186  20.988   8
  -3  -1   3 405.078  18.701   7
  -3  -1   3 379.730  29.814   3
  -3  -1   3 373.469  19.744   1
  -3  -1   3 364.567  16.145   2
  -3  -1   3 380.188  17.845   1
   2   1  -3 169.417   7.815   1
   2   1  -3 154.223   9.616   7
   2   1  -3 167.151  12.090   8
   2   1  -3 175.589  11.218   3
   2   1  -3 157.769   9.208   1
  -2  -1   3 152.729   8.327   3
  -2  -1   3 144.248   9.455   1
  -2  -1   3 161.241   6.917   1
  -2  -1   3 154.779  14.750   7
  -2  -1   3 163.989   9.060   8
   1   1  -3 34.1863  2.9314   3
   1   1  -3 29.6040  2.6443   1
   1   1  -3 30.8553  2.3578   1
   1   1  -3 35.1828  3.1541   8
   1   1  -3 30.0753  2.4369   7
  -1  -1   3 31.7533  2.5622   1
  -1  -1   3 32.7848  2.1085   1
   0   1  -3 1125.33   44.36   1
   0   1  -3 885.504  57.578   1
   0  -1   3 1093.17   59.95   1
   0  -1   3 1087.14   61.96   1
  -1   1  -3 0.49009 0.73167   1
  -1   1  -3 0.47408 1.00664   1
  -1   1  -3 1.91501 1.14195   5
  -1   1  -3 -0.4715  0.6176   3
  -1   1  -3 0.44672 0.37137   4
   1  -1   3 1.83206 1.08190   1
   1  -1   3 3.80741 1.48104   2
   1  -1   3 0.22797 0.87755   1
   1  -1   3 0.63029 0.92124   3
   1  -1   3 1.27196 1.34705   5
  -2   1  -3 405.039  34.085   2
  -2   1  -3 383.984  15.612   1
  -2   1  -3 404.987  23.538   5
  -2   1  -3 398.897  31.796   3
  -2   1  -3 380.825  23.246   1
  -2   1  -3 370.613  19.622   4
   2  -1   3 398.647  20.796   6
   2  -1   3 381.034  17.030   1
   2  -1   3 385.830  26.932   5
   2  -1   3 391.330  25.430   3
   2  -1   3 372.111  22.854   1
   2  -1   3 392.658  26.179   2
  -3   1  -3 5.69849 1.99877   5
  -3   1  -3 11.0706  2.2077   2
  -3   1  -3 11.2393  1.1189   1
  -3   1  -3 9.92925 1.82037   4
  -3   1  -3 9.99273 0.97670   1
  -3   1  -3 12.0423  2.2868   3
  -3   1  -3 8.34068 1.29766   6
   3  -1   3 12.2551  2.5133   2
   3  -1   3 11.6933  1.9529   3
   3  -1   3 6.67819 1.95644   5
   3  -1   3 12.2994  1.1413   1
   3  -1   3 14.5998  2.1644   6
  -4   1  -3 2862.44  146.78   4
  -4   1  -3 2816.02  136.09   6
   4  -1   3 2926.69  122.51   1
   4  -1   3 2746.74  164.05   3
   4  -1   3 2468.18  113.30   1
   4  -1   3 2746.68   94.04   6
   4  -1   3 2807.65  118.56   2
   4  -1   3 2811.95  113.75   5
  -5   1  -3 10.1086  2.5181   7
  -5   1  -3 8.28923 2.11429   6
  -5   1  -3 4.39897 2.41411   4
   5  -1   3 10.5156  2.9126   2
   5  -1   3 14.1841  3.6307   3
   5  -1   3 9.90642 3.31381   5
  -6   1  -3 1067.49   35.10   4
  -6   1  -3 1093.47   72.73   6
  -6   1  -3 1041.11   47.20   7
   6  -1   3 1080.90   56.16   2
   6  -1   3 1050.56   49.77   3
   6  -1   3 1084.30   69.27   5
  -7   1  -3 67.7445  6.7889   6
  -7   1  -3 55.3569  5.1694   4
  -7   1  -3 64.5657  6.5509   7
   7  -1   3 60.2632  6.3469   2
   7  -1   3 63.4015  7.0388   3
   7  -1   3 54.0977  6.8276   5
  -8   1  -3 148.597  13.451   6
  -8   1  -3 169.613  12.523   7
  -8   1  -3 160.323  12.385   4
   8  -1   3 163.061  12.270   5
   8  -1   3 127.987   9.622   2
   8  -1   3 138.595  14.498   3
  -9   1  -3 313.132  20.319   4
  -9   1  -3 334.378  22.090   7
   9  -1   3 266.657  15.956   2
   9  -1   3 311.490  18.903   5
   9  -1   3 267.213  19.338   3
 -10   1  -3 22.1211  7.0391   7
 -10   1  -3 37.3331  8.6307   4
  10  -1   3 18.1412  5.3990   3
  10  -1   3 30.7716  7.0074   5
  10  -1   3  87.750 100.537   2
 -11   1  -3 55.8160  8.7857   4
 -11   1  -3 51.3553 11.2575   7
  11  -1   3 98.8417 43.0148   5
  11  -1   3 65.6306  9.0852   3
  11  -1   3 47.8697 10.7305   2
  11   0  -3 23.1957  7.5824   3
 -11   0   3 28.1636  8.0419   7
  10   0  -3 68.8404  9.2091   3
 -10   0   3 76.7213 10.5863   7
 -10   0   3 77.7834  9.8418   4
   9   0  -3 152.479  13.590   3
  -9   0   3 175.380  17.301   7
  -9   0   3 174.035  13.008   4
   8   0  -3 104.588   7.427   1
   8   0  -3 129.286  12.212   3
  -8   0   3 103.970   8.536   8
  -8   0   3 119.614   8.594   4
  -8   0   3 110.179   9.510   7
   7   0  -3 1300.38   77.14   3
   7   0  -3 1229.80   93.78   1
  -7   0   3 1243.62   68.56   8
  -7   0   3 1297.15   53.59   7
   6   0  -3 508.057  27.712   1
   6   0  -3 468.053  23.981   1
   6   0  -3 527.427  29.935   3
  -6   0   3 510.576  18.454   1
  -6   0   3 513.758  24.848   8
  -6   0   3 499.873  26.939   7
   5   0  -3 439.879  28.786   1
   5   0  -3 455.752  23.221   1
   5   0  -3 463.354  27.861   3
  -5   0   3 442.719  21.134   7
  -5   0   3 481.112  19.240   1
  -5   0   3 458.203  16.739   8
   4   0  -3 461.248  22.358   1
   4   0  -3 427.136  24.720   1
   4   0  -3 434.996  17.957   3
  -4   0   3 428.070  19.811   7
  -4   0   3 443.386  17.845   1
  -4   0   3 434.000  15.507   8
   3   0  -3 831.212  38.054   1
   3   0  -3 781.848  41.398   7
   3   0  -3 706.831  32.404   1
   3   0  -3 778.556  57.764   3
  -3   0   3 808.083  65.079   3
  -3   0   3 764.043  41.570   1
  -3   0   3 762.833  43.705   7
  -3   0   3 783.781  30.779   1
  -3   0   3 773.933  53.477   2
  -3   0   3 798.855  56.202   8
  -3   0   3 800.718  73.188   5
   2   0  -3 22.8900  2.4813   1
   2   0  -3 29.6878  3.2724   3
   2   0  -3 21.2494  2.1495   1
   2   0  -3 26.1568  2.8289   7
  -2   0   3 22.3464  2.8412   7
  -2   0   3 23.4726  2.5281   1
  -2   0   3 22.7809  2.4094   1
  -2   0   3 28.7125  2.7078   8
   1   0  -3 414.294  20.212   8
   1   0  -3 423.843  28.380   7
   1   0  -3 426.382  23.045   1
   1   0  -3 401.992  17.662   1
  -1   0   3 385.623  27.537   7
  -1   0   3 385.596  29.753   8
  -1   0   3 396.224  29.063   1
  -1   0   3 372.288  24.858   4
  -1   0  -3 129.498  10.993   6
  -2   0  -3 56.8500  4.6535   5
  -2   0  -3 50.2787  3.1505   4
  -2   0  -3 42.0443  4.1676   2
  -2   0  -3 53.4117  3.0716   1
  -2   0  -3 47.6934  2.2882   1
  -2   0  -3 57.0112  4.3985   6
  -2   0  -3 56.3983  4.4171   3
   2   0   3 50.7484  4.2496   3
   2   0   3 52.6916  3.5135   4
   2   0   3 47.5227  2.5578   1
   2   0   3 50.4577  3.3592   6
   2   0   3 51.9556  3.6718   2
   2   0   3 52.6168  4.1419   5
  -3   0  -3 310.049  19.785   2
  -3   0  -3 314.698  17.209   5
  -3   0  -3 286.220  12.392   4
  -3   0  -3 309.960  30.622   3
  -3   0  -3 282.870  19.450   6
   3   0   3 307.825  17.284   2
   3   0   3 295.037  21.087   6
   3   0   3 310.896  15.041   5
   3   0   3 271.713  16.398   3
  -4   0  -3 142.022   6.548   4
  -4   0  -3 123.956   9.521   6
  -4   0  -3 141.122   9.727   7
   4   0   3 143.486   6.902   5
   4   0   3 140.316   7.273   2
   4   0   3 135.691   8.230   3
  -5   0  -3 357.137  13.833   4
  -5   0  -3 352.038  22.325   6
  -5   0  -3 324.245  16.363   7
   5   0   3 361.438  20.941   2
   5   0   3 369.346  15.640   3
   5   0   3 352.420  26.755   5
  -6   0  -3 198.079  14.785   6
  -6   0  -3 196.355  13.992   7
  -6   0  -3 192.793  10.350   4
   6   0   3 193.347  12.787   2
   6   0   3 214.613  22.833   5
   6   0   3 185.108  10.529   3
  -7   0  -3 0.37477 2.67257   4
  -7   0  -3 0.50203 2.12181   6
  -7   0  -3 0.86224 3.06123   7
   7   0   3 -1.6642  3.3502   2
   7   0   3 0.85524 2.87773   5
   7   0   3 -2.8851  2.7126   3
  -8   0  -3 940.262  59.266   4
  -8   0  -3 907.524  61.708   7
  -8   0  -3 875.620  62.902   6
   8   0   3 830.958  41.697   3
   8   0   3 890.749  38.007   2
   8   0   3 940.284  43.903   5
  -9   0  -3 107.680  11.313   7
  -9   0  -3 102.613  13.744   4
   9   0   3 102.075  11.929   3
   9   0   3 109.711   9.557   5
   9   0   3 112.757   8.945   2
 -10   0  -3 69.4234  9.0548   4
 -10   0  -3 76.7695 10.1080   7
  10   0   3 71.7287  9.3652   3
  10   0   3 82.8369  9.3518   2
  10   0   3 59.2433  8.6820   5
 -11   0  -3 142.899  15.207   7
 -11   0  -3 116.049  13.485   4
  11   0   3 158.344  20.600   3
  11  -1  -3 59.3114  8.7826   3
 -11   1   3 62.4788 10.0215   7
 -11   1   3 34.7173  8.4672   4
  10  -1  -3 63.4290  7.7787   3
 -10   1   3 54.8232  9.6909   7
   9  -1  -3 1.99271 4.91905   3
  -9   1   3 2.36977 5.73778   7
  -9   1   3 2.04408 5.75203   4
  -9   1   3 -2.3076  3.6041   8
   8  -1  -3 510.239  37.996   3
   8  -1  -3 447.693  33.867   1
  -8   1   3 519.434  43.663   7
  -8   1   3 488.734  22.712   8
   7  -1  -3 266.123  20.110   1
   7  -1  -3 289.353  15.320   3
  -7   1   3 307.694  21.052   7
  -7   1   3 276.473  17.693   8
   6  -1  -3 296.913  20.602   1
   6  -1  -3 305.189  19.990   1
   6  -1  -3 292.100  14.506   3
  -6   1   3 281.217  17.575   1
  -6   1   3 300.158  20.059   8
  -6   1   3 304.343  18.961   7
   5  -1  -3 159.368  12.255   3
   5  -1  -3 167.909  11.246   1
   5  -1  -3 173.724  10.793   1
  -5   1   3 176.508   7.179   1
  -5   1   3 171.924  11.684   7
   4  -1  -3 249.301  16.736   3
   4  -1  -3 264.952  10.531   1
   4  -1  -3 253.619  16.210   1
  -4   1   3 256.225   9.482   1
  -4   1   3 249.071  14.992   7
   3  -1  -3 93.3250  8.1609   3
   3  -1  -3 111.705   4.998   1
   3  -1  -3 105.047   6.128   1
  -3   1   3 104.023  10.273   4
  -3   1   3 99.5486  8.1056   7
  -3   1   3 107.261   5.517   1
  -3   1   3 107.681   9.229   2
  -3   1   3 109.706   7.571   1
   2  -1  -3 2074.12  132.33   3
   2  -1  -3 1901.01   96.68   1
   2  -1  -3 2003.58   86.52   1
   2  -1  -3 2104.04   97.67   7
  -2   1   3 2013.58  108.24   7
  -2   1   3 1970.30  101.74   1
  -2   1   3 1969.43   98.11   1
  -2   1   3 2142.47  114.51   5
  -2   1   3 2168.74  117.83   4
   1  -1  -3 -9.4618  1.6675   4
   1  -1  -3 -11.988   1.027   1
   1  -1  -3 -10.448   1.344   7
   1  -1  -3 -13.466   1.386   1
  -1   1   3 -11.387   1.285   8
  -1   1   3 -11.169   1.234   4
  -1   1   3 -11.197   1.359   7
  -1   1   3 -11.180   1.213   1
  -1   1   3 -13.004   0.992   1
  -1  -1  -3 0.45748 0.57988   1
  -1  -1  -3 -0.4775  0.4603   8
  -1  -1  -3 -0.8715  0.8520   4
  -1  -1  -3 -0.2983  0.6481   1
  -1  -1  -3 0.39176 0.56064   5
  -1  -1  -3 1.94864 1.08442   6
   1   1   3 2.27136 0.94825   2
   1   1   3 0.99508 0.70205   1
   1   1   3 0.67973 0.83671   1
   1   1   3 0.82888 0.73273   6
   1   1   3 1.49817 0.79292   4
   1   1   3 1.49753 0.81201   5
  -2  -1  -3 3979.83  241.06   4
  -2  -1  -3 3753.86  297.31   6
  -2  -1  -3 3949.22  247.85   2
  -2  -1  -3 3657.33  252.48   7
   2   1   3 3744.63  146.17   1
   2   1   3 3979.44  258.05   3
   2   1   3 3973.36  253.58   5
   2   1   3 3757.85  337.89   6
   2   1   3 3996.61  259.93   2
  -3  -1  -3 899.005  36.586   1
  -3  -1  -3 974.798  54.659   2
  -3  -1  -3 957.330  46.263   4
  -3  -1  -3 1086.70   73.16   3
  -3  -1  -3 1012.37   43.71   7
  -3  -1  -3 997.053  60.590   5
  -3  -1  -3 941.280  64.264   6
  -3  -1  -3 1049.72   62.96   1
   3   1   3 1011.56   50.82   5
   3   1   3 966.444  48.894   3
   3   1   3 946.493  42.204   1
   3   1   3 898.039  37.822   1
   3   1   3 1059.02   68.20   4
   3   1   3 943.860  55.805   2
  -4  -1  -3 2536.70  101.74   4
  -4  -1  -3 2552.39  367.25   5
  -4  -1  -3 2423.25  181.29   6
  -4  -1  -3 2570.13  168.76   7
   4   1   3 2438.21  142.39   3
   4   1   3 2517.38  126.89   5
   4   1   3 2550.10  117.48   2
  -5  -1  -3 129.351   9.210   6
  -5  -1  -3 129.603   7.903   4
  -5  -1  -3 135.075  10.690   7
   5   1   3 124.631   9.388   5
   5   1   3 122.844   7.874   3
   5   1   3 115.629   7.996   2
  -6  -1  -3 7.66888 3.02033   4
  -6  -1  -3 5.50203 2.49737   7
  -6  -1  -3 8.75170 2.21986   6
   6   1   3 8.23820 2.68302   5
   6   1   3 4.95707 3.32533   2
   6   1   3 4.14698 2.47658   3
  -7  -1  -3 117.475  11.150   6
  -7  -1  -3 131.647   9.599   4
  -7  -1  -3 114.399   6.852   7
   7   1   3 126.303   7.949   5
   7   1   3 108.877   7.260   2
   7   1   3 108.695   9.793   3
  -8  -1  -3 164.393  14.756   7
  -8  -1  -3 141.136  14.154   6
  -8  -1  -3 157.882  13.918   4
   8   1   3 155.883   8.685   2
   8   1   3 165.792  11.907   3
   8   1   3 187.963  12.278   5
  -9  -1  -3 25.5240  5.7287   7
  -9  -1  -3 21.1545  5.4183   6
  -9  -1  -3 26.3559  5.1271   4
   9   1   3 14.4508  5.0340   5
   9   1   3 26.5133  7.6774   3
   9   1   3 17.6337  4.8741   2
 -10  -1  -3 8.15704 5.55146   4
 -10  -1  -3 3.33655 5.78961   7
  10   1   3 18.4121  6.2518   2
  10   1   3 6.42168 5.48674   3
 -11  -1  -3 76.3223  9.6173   4
 -11  -1  -3 55.9859 10.1064   7
  11   1   3 92.8553 10.6012   3
  11  -2  -3 29.1739  8.8177   3
 -11   2   3 9.86812 7.25556   4
 -11   2   3 19.5030  9.2145   7
  10  -2  -3 7.82161 6.14921   3
 -10   2   3 1.55136 6.01043   7
 -10   2   3 3.09825 6.44269   4
   9  -2  -3 33.8649  6.7088   3
  -9   2   3 25.4090  7.2635   7
  -9   2   3 33.0883  5.8633   8
   8  -2  -3 454.657  27.924   3
   8  -2  -3 440.697  33.555   1
  -8   2   3 476.696  26.034   7
  -8   2   3 474.180  27.638   8
   7  -2  -3 9.53165 2.20710   1
   7  -2  -3 16.1530  4.3734   3
  -7   2   3 8.87659 4.19873   7
  -7   2   3 8.48565 2.15400   6
   6  -2  -3 2.34856 3.93506   3
   6  -2  -3 3.77836 2.95220   5
   6  -2  -3 -0.0321  1.7969   1
   6  -2  -3 1.25852 1.73778   1
  -6   2   3 0.45277 1.84916   1
  -6   2   3 -3.0290  2.9177   7
  -6   2   3 0.12510 1.10295   6
   5  -2  -3 470.804  31.111   5
   5  -2  -3 510.429  32.548   1
   5  -2  -3 515.176  22.040   3
   5  -2  -3 477.678  33.514   1
  -5   2   3 496.177  26.458   7
  -5   2   3 545.128  22.370   1
   4  -2  -3 64.5883  4.9111   5
   4  -2  -3 67.1947  5.0466   1
   4  -2  -3 68.5066  5.0725   1
   4  -2  -3 68.9821  4.4665   3
  -4   2   3 67.9474  4.7028   7
  -4   2   3 63.8984  3.7259   1
   3  -2  -3 1142.89   39.55   1
   3  -2  -3 1145.28   61.18   5
   3  -2  -3 1130.49   65.49   3
   3  -2  -3 1044.39   57.28   1
  -3   2   3 1114.04   60.88   7
  -3   2   3 1133.40   60.26   4
  -3   2   3 1095.92   46.57   1
  -3   2   3 1088.16   68.04   1
   2  -2  -3 157.745   7.417   1
   2  -2  -3 138.857   9.253   1
   2  -2  -3 135.556   9.422   5
  -2   2   3 132.386  10.280   4
  -2   2   3 130.737   8.570   1
  -2   2   3 141.031   7.965   1
  -2   2   3 125.670   7.787   7
  -2   2   3 142.555   9.340   5
  -2   2   3 144.904   9.405   2
   1  -2  -3 1395.97   48.99   1
   1  -2  -3 1444.26  117.84   4
   1  -2  -3 1270.45   76.80   6
   1  -2  -3 1306.45   81.78   1
  -1   2   3 1442.47  102.94   5
  -1   2   3 1263.61   74.60   6
  -1   2   3 1225.55   92.92   1
  -1   2   3 1213.27   72.22   1
  -1   2   3 1426.49  103.45   4
  -1   2   3 1115.39   58.97   7
   0  -2  -3 21.7792  2.7238   4
   0  -2  -3 12.3885  1.6000   1
   0  -2  -3 17.2409  1.8332   6
   0  -2  -3 16.1688  1.6991   1
   0   2   3 16.0715  2.0197   1
   0   2   3 16.5040  1.9967   4
   0   2   3 17.3518  1.7216   1
  -1  -2  -3 912.614  74.222   6
  -1  -2  -3 953.603  44.284   1
  -1  -2  -3 1011.07   91.35   4
  -1  -2  -3 824.623  46.559   1
   1   2   3 811.659  64.781   5
   1   2   3 865.922  50.627   8
   1   2   3 1065.34   71.76   7
   1   2   3 1039.98   75.89   2
   1   2   3 947.386  57.072   1
   1   2   3 1015.69   72.16   4
   1   2   3 895.634  44.697   1
  -2  -2  -3 73.8407  5.4009   3
  -2  -2  -3 75.3114  5.8885   2
  -2  -2  -3 70.9651  4.9867   5
  -2  -2  -3 73.7974  5.4536   6
  -2  -2  -3 81.0271  6.8907   7
  -2  -2  -3 74.5431  4.3937   1
  -2  -2  -3 73.6336  3.4699   1
  -2  -2  -3 81.8985  7.5907   4
   2   2   3 77.1821  3.9652   5
   2   2   3 78.3072  5.7041   4
   2   2   3 79.7766  5.2880   3
   2   2   3 64.7341  3.2451   1
   2   2   3 68.0457  4.9511   2
   2   2   3 76.2562  5.6683   7
   2   2   3 76.2748  4.6261   1
  -3  -2  -3 1229.20  176.47   3
  -3  -2  -3 883.971 139.018   2
   3   2   3 1636.89  369.18   4
  -4  -2  -3 390.722  24.619   1
  -4  -2  -3 385.496  26.229   6
  -4  -2  -3 409.428  40.422   5
  -4  -2  -3 422.988  18.336   7
  -4  -2  -3 442.878  25.496   1
  -4  -2  -3 383.249  20.240   4
   4   2   3 365.417  14.450   1
   4   2   3 393.731  24.870   3
   4   2   3 429.390  20.517   2
   4   2   3 445.471  18.969   7
   4   2   3 418.662  20.320   5
  -5  -2  -3 6332.11  519.09   6
  -5  -2  -3 6650.54  374.84   7
  -5  -2  -3 6227.89  380.28   4
   5   2   3 5678.09  236.81   1
   5   2   3 6036.50  292.75   2
   5   2   3 6254.08  453.16   3
   5   2   3 6175.88  268.50   5
  -6  -2  -3 22.7707  3.8169   4
  -6  -2  -3 19.8083  2.6765   8
  -6  -2  -3 23.3391  3.4033   6
  -6  -2  -3 19.9229  3.8085   7
   6   2   3 17.2879  3.4898   3
   6   2   3 17.7199  3.5903   2
   6   2   3 23.9007  2.7173   5
  -7  -2  -3 655.480  46.670   6
  -7  -2  -3 680.930  34.233   7
  -7  -2  -3 649.342  49.247   8
  -7  -2  -3 671.814  31.571   4
   7   2   3 662.075  33.693   5
   7   2   3 682.979  44.782   3
   7   2   3 659.228  27.779   2
  -8  -2  -3 3.58578 5.06518   7
  -8  -2  -3 6.31052 3.88523   4
  -8  -2  -3 2.50420 3.21885   6
   8   2   3 5.40507 3.15025   5
   8   2   3 6.07020 3.52337   2
   8   2   3 -2.7224  4.2603   3
  -9  -2  -3 144.758  15.045   4
  -9  -2  -3 138.789  13.436   6
  -9  -2  -3 131.469  11.890   7
   9   2   3 145.505  12.090   2
   9   2   3 125.893  13.410   3
 -10  -2  -3 48.3727  8.3721   4
 -10  -2  -3 39.8681  8.4966   7
  10   2   3 51.0279  6.9486   2
  10   2   3 51.4318  8.8622   3
 -11  -2  -3 2.49598 7.33942   7
 -11  -2  -3 3.32374 6.59354   4
  11   2   3 -2.5332  6.2038   3
  11  -3  -3 5.19404 8.34892   3
 -11   3   3 2.77364 7.64593   7
 -11   3   3 6.84791 5.99455   4
  10  -3  -3 -3.6659  5.5980   3
 -10   3   3 1.29119 5.59747   7
 -10   3   3 5.16020 5.53878   4
   9  -3  -3 55.8334  7.2295   3
  -9   3   3 62.4967  9.0533   7
  -9   3   3 56.4968  8.4065   8
   8  -3  -3 6.87612 4.04814   3
   8  -3  -3 2.94657 2.06016   1
  -8   3   3 2.05728 4.43022   7
   7  -3  -3 323.312  27.410   1
   7  -3  -3 326.915  20.877   3
   7  -3  -3 309.527  23.040   5
  -7   3   3 338.436  23.259   7
   6  -3  -3 110.345  11.091   3
   6  -3  -3 106.414   8.190   5
   6  -3  -3 101.037   7.352   1
   6  -3  -3 116.288   6.434   1
  -6   3   3 113.065   8.247   7
  -6   3   3 106.464   4.480   6
  -6   3   3 104.335   6.440   1
   5  -3  -3 557.202  39.780   1
   5  -3  -3 564.929  31.355   5
   5  -3  -3 607.716  31.620   1
   5  -3  -3 536.296  30.776   3
  -5   3   3 623.089  22.709   6
  -5   3   3 536.898  24.688   1
  -5   3   3 611.526  33.927   7
   4  -3  -3 397.462  17.810   1
   4  -3  -3 413.489  22.790   5
   4  -3  -3 402.523  26.302   1
   4  -3  -3 457.370  19.614   3
  -4   3   3 447.717  24.277   7
  -4   3   3 420.008  19.142   1
   3  -3  -3 9.74298 2.80702   5
   3  -3  -3 7.97980 2.22851   3
   3  -3  -3 9.06245 2.83752   4
   3  -3  -3 12.3846  2.1838   1
   3  -3  -3 5.95450 1.67466   1
  -3   3   3 8.39873 2.00256   7
  -3   3   3 10.8996  1.8290   1
   2  -3  -3 164.227   8.397   1
   2  -3  -3 167.779  10.730   5
   2  -3  -3 168.956  11.618   4
   2  -3  -3 152.221   7.568   1
  -2   3   3 166.120  12.027   5
  -2   3   3 186.746  14.788   4
  -2   3   3 162.526   9.184   1
  -2   3   3 180.046   7.532   1
  -2   3   3 194.066  12.634   2
   1  -3  -3 26.9040  2.3909   1
   1  -3  -3 35.8346  3.2757   4
   1  -3  -3 31.1217  2.6293   1
   1  -3  -3 25.6355  2.2482   5
   1  -3  -3 27.5064  2.0231   6
  -1   3   3 24.9346  2.4365   1
  -1   3   3 37.2114  3.6571   4
  -1   3   3 34.2647  3.0803   5
  -1   3   3 28.6225  2.7539   1
  -1   3   3 36.8347  2.9013   2
   0  -3  -3 1131.89  103.26   4
   0  -3  -3 1029.85   45.20   1
   0  -3  -3 1086.02   56.64   1
   0   3   3 1103.58   73.00   5
   0   3   3 1123.41  123.43   4
   0   3   3 1107.43   73.94   1
   0   3   3 1117.60   50.50   1
  -1  -3  -3 16.7309  1.7002   1
  -1  -3  -3 22.0238  2.5066   1
  -1  -3  -3 19.5051  2.1423   4
   1   3   3 24.6705  2.3494   1
   1   3   3 22.2922  1.7007   2
   1   3   3 22.8605  2.6038   4
   1   3   3 19.3928  2.0412   1
  -2  -3  -3 9.09388 2.43636   4
  -2  -3  -3 10.5308  1.5679   1
  -2  -3  -3 8.53235 1.06179   5
  -2  -3  -3 7.59117 1.92532   3
  -2  -3  -3 10.7300  1.9698   1
  -2  -3  -3 9.69583 1.73929   2
   2   3   3 11.5122  1.3166   7
   2   3   3 11.2730  1.5933   2
   2   3   3 9.54134 1.02042   5
   2   3   3 10.9020  1.9516   4
   2   3   3 14.3872  1.7349   1
   2   3   3 11.1843  1.6980   1
  -3  -3  -3 121.227  11.321   2
  -3  -3  -3 94.4240  8.3568   5
  -3  -3  -3 110.713   6.986   1
  -3  -3  -3 102.037   6.214   1
  -3  -3  -3 120.570   7.735   4
  -3  -3  -3 113.750   9.246   7
   3   3   3 99.5444  5.5302   1
   3   3   3 99.6304  6.0187   3
   3   3   3 105.444   6.220   2
   3   3   3 105.920   5.832   1
   3   3   3 117.460   7.355   7
   3   3   3 108.873   5.846   5
  -4  -3  -3 5691.67  205.11   4
  -4  -3  -3 5950.32  270.42   1
  -4  -3  -3 6057.56  506.21   7
   4   3   3 5702.84  278.07   5
   4   3   3 5836.48  378.08   3
   4   3   3 4992.02  246.28   2
   4   3   3 5372.76  281.35   1
  -5  -3  -3 37.1901  2.9384   1
  -5  -3  -3 32.4907  4.5355   7
  -5  -3  -3 32.6843  5.0195   4
  -5  -3  -3 35.9404  2.4013   8
   5   3   3 30.1714  3.4209   2
   5   3   3 26.2566  2.0292   1
   5   3   3 31.3928  3.4334   3
   5   3   3 33.3410  3.6433   5
  -6  -3  -3 104.724   8.131   7
  -6  -3  -3 106.697   8.195   1
  -6  -3  -3 108.660   8.469   4
  -6  -3  -3 104.209  10.414   6
  -6  -3  -3 114.970   6.912   8
   6   3   3 127.937   7.320   1
   6   3   3 114.340   7.162   1
   6   3   3 124.528   7.629   2
   6   3   3 117.696   7.422   3
   6   3   3 120.407   8.353   5
  -7  -3  -3 216.113  14.819   8
  -7  -3  -3 197.345  13.377   4
  -7  -3  -3 205.560  14.229   7
  -7  -3  -3 202.359  17.721   6
   7   3   3 207.131  12.115   3
   7   3   3 188.382  10.050   1
   7   3   3 199.519  10.802   2
   7   3   3 236.510  15.769   1
  -8  -3  -3 318.135  20.119   4
  -8  -3  -3 281.836  17.883   7
  -8  -3  -3 282.806  19.172   6
   8   3   3 335.825  21.527   3
   8   3   3 285.545  18.817   2
  -9  -3  -3 11.8828  4.3918   6
  -9  -3  -3 4.16386 4.65239   7
  -9  -3  -3 6.73849 5.01324   4
   9   3   3 11.2592  4.3094   2
   9   3   3 -2.5410  5.0114   3
 -10  -3  -3 78.8012  9.0307   4
 -10  -3  -3 64.2102  9.7521   7
  10   3   3 68.7637  8.9398   3
 -11  -3  -3 -3.8959  7.4692   7
 -11  -3  -3 11.2984  7.9496   4
  11   3   3 6.86958 6.95657   3
  11  -4  -3 16.1600  7.9025   3
 -11   4   3 7.93207 8.58124   7
 -11   4   3 -1.7187  7.8857   4
  10  -4  -3 9.79311 7.39337   3
 -10   4   3 9.54844 6.79391   7
   9  -4  -3 24.0709  7.0134   3
  -9   4   3 23.6324  7.0095   7
   8  -4  -3 44.9364  6.3821   3
   8  -4  -3 24.2038  4.2486   1
   8  -4  -3 26.3457  5.8363   5
  -8   4   3 31.1014  6.4553   7
   7  -4  -3 53.3829  6.9633   3
   7  -4  -3 55.0464  7.0621   5
   7  -4  -3 48.7666  5.2627   1
  -7   4   3 48.0469  5.9549   7
   6  -4  -3 2.07222 2.06573   1
   6  -4  -3 -2.0155  2.4313   3
   6  -4  -3 0.80472 3.22702   5
   6  -4  -3 2.15245 2.31174   1
  -6   4   3 -0.5134  3.0139   7
  -6   4   3 2.36383 2.48230   1
   5  -4  -3 245.073  14.430   3
   5  -4  -3 231.970  18.603   1
   5  -4  -3 233.240  11.169   5
   5  -4  -3 211.420  13.257   1
  -5   4   3 247.003  14.738   7
  -5   4   3 212.443   9.781   1
   4  -4  -3 62.7480  5.6797   1
   4  -4  -3 57.0995  5.0629   3
   4  -4  -3 58.5495  4.5175   5
   4  -4  -3 56.7354  4.6527   1
  -4   4   3 74.5015  5.9219   7
  -4   4   3 56.2827  3.6884   1
   3  -4  -3 475.473  28.307   1
   3  -4  -3 499.942  20.037   5
   3  -4  -3 502.819  38.162   4
   3  -4  -3 480.081  20.835   1
  -3   4   3 480.085  23.099   1
   2  -4  -3 57.2857  3.3291   6
   2  -4  -3 61.1050  3.8848   5
   2  -4  -3 49.3329  3.9343   1
   2  -4  -3 56.5527  5.3101   4
   2  -4  -3 62.6438  4.8715   1
  -2   4   3 62.4234  3.9866   1
  -2   4   3 62.9295  4.4501   5
  -2   4   3 56.9516  6.4728   4
  -2   4   3 58.6022  6.4770   2
   1  -4  -3 114.081   7.598   5
   1  -4  -3 122.120   8.884   4
   1  -4  -3 112.507   5.545   1
   1  -4  -3 104.458   7.912   1
  -1   4   3 112.114   6.630   5
  -1   4   3 120.773   7.679   2
  -1   4   3 113.093   6.008   1
  -1   4   3 103.560   5.762   1
  -1   4   3 125.383   8.509   4
   0  -4  -3 3.54992 1.77417   1
   0  -4  -3 3.69280 1.23111   5
   0  -4  -3 2.96000 1.69514   1
   0  -4  -3 3.11060 2.46891   4
   0   4   3 6.31671 1.89075   1
   0   4   3 3.85741 1.62157   1
   0   4   3 4.76239 1.03171   5
   0   4   3 5.08511 1.66895   4
  -1  -4  -3 85.2960  5.1654   1
  -1  -4  -3 79.9665  8.4734   4
  -1  -4  -3 83.2080  3.9507   1
   1   4   3 84.0363  5.9571   4
   1   4   3 92.5220  5.0631   1
   1   4   3 73.9475  3.9890   2
   1   4   3 80.7198  5.3969   1
  -2  -4  -3 242.030  21.573   3
  -2  -4  -3 231.329  14.074   2
  -2  -4  -3 229.989  13.972   1
  -2  -4  -3 257.795  19.379   4
  -2  -4  -3 248.247  10.933   1
  -2  -4  -3 209.054   9.791   5
   2   4   3 286.842  22.933   7
   2   4   3 233.781  18.829   4
   2   4   3 229.976  11.025   1
   2   4   3 244.256  10.766   1
   2   4   3 243.462  11.800   2
  -3  -4  -3 381.747  29.388   5
  -3  -4  -3 419.158  30.770   2
  -3  -4  -3 453.053  23.126   1
  -3  -4  -3 390.150  24.156   4
   3   4   3 441.426  29.307   7
   3   4   3 462.132  33.185   3
   3   4   3 438.534  16.033   2
   3   4   3 424.806  22.993   1
   3   4   3 422.614  18.800   1
  -4  -4  -3 387.508  33.630   4
  -4  -4  -3 410.711  21.937   1
  -4  -4  -3 392.674  35.668   5
  -4  -4  -3 449.116  26.910   7
   4   4   3 422.721  20.873   1
   4   4   3 401.865  26.261   3
   4   4   3 409.841  36.934   7
   4   4   3 398.596  20.703   1
   4   4   3 404.772  17.065   2
  -5  -4  -3 2569.66  163.97   1
  -5  -4  -3 2637.91  136.26   4
  -5  -4  -3 2590.63  137.56   7
   5   4   3 2405.31   84.23   1
   5   4   3 2527.76  170.97   1
   5   4   3 2432.68  105.71   3
   5   4   3 2485.66   98.12   2
  -6  -4  -3 19.8417  4.1878   4
  -6  -4  -3 22.7336  3.5077   7
  -6  -4  -3 19.7867  2.4931   1
   6   4   3 24.6660  2.5208   1
   6   4   3 28.3435  3.7449   3
   6   4   3 24.5708  3.2612   1
   6   4   3 31.2239  3.5153   2
  -7  -4  -3 92.9969  9.5520   7
  -7  -4  -3 95.8631  9.0042   4
   7   4   3 81.0417  6.1189   1
   7   4   3 82.8539  7.0458   3
   7   4   3 91.3901  6.6824   2
  -8  -4  -3 16.6351  5.0635   4
  -8  -4  -3 13.8625  5.6634   7
  -8  -4  -3 18.8757  4.6878   6
   8   4   3 18.1303  2.4095   1
   8   4   3 22.3677  5.1419   3
   8   4   3 28.4027  5.4681   2
  -9  -4  -3 1.10043 4.60936   6
  -9  -4  -3 -5.6040  4.8962   4
  -9  -4  -3 6.18708 5.14313   7
   9   4   3 7.04913 4.57415   3
 -10  -4  -3 10.0528  5.7048   6
 -10  -4  -3 16.8258  6.7679   4
 -10  -4  -3 10.0013  6.0430   7
  10   4   3 6.30548 5.86120   3
 -11  -4  -3 1.75906 8.00380   7
 -11  -4  -3 -5.4686  6.6113   4
  11   4   3 -0.6802  8.1195   3
  11  -5  -3 2.94228 7.60452   3
 -11   5   3 15.1911  8.7347   7
 -11   5   3 10.7571  6.3392   4
  10  -5  -3 22.3277  7.5969   3
 -10   5   3 -0.2341  6.4370   7
   9  -5  -3 18.0767  5.8167   3
  -9   5   3 16.5797  7.2207   7
   8  -5  -3 312.989  30.269   1
   8  -5  -3 318.050  24.618   3
   8  -5  -3 340.900  33.777   5
  -8   5   3 362.427  25.742   7
   7  -5  -3 -0.1544  3.5297   3
   7  -5  -3 3.02183 3.03903   1
   7  -5  -3 3.74458 4.76686   5
  -7   5   3 -0.3477  4.1406   7
   6  -5  -3 80.2600  9.0212   3
   6  -5  -3 81.2505  5.1441   1
   6  -5  -3 62.5773  7.0755   5
  -6   5   3 59.3538  4.9223   1
  -6   5   3 78.3183  6.1240   7
   5  -5  -3 336.104  13.858   5
   5  -5  -3 333.165  23.728   1
   5  -5  -3 352.776  23.893   3
   5  -5  -3 329.434  29.202   1
  -5   5   3 354.822  19.341   1
  -5   5   3 358.573  18.552   7
   4  -5  -3 134.511  11.523   4
   4  -5  -3 147.469  11.249   5
   4  -5  -3 127.661   7.645   1
   4  -5  -3 156.291  12.795   3
   4  -5  -3 139.911  13.005   1
  -4   5   3 130.500   7.012   1
   3  -5  -3 213.230  18.715   4
   3  -5  -3 192.741  12.467   1
   3  -5  -3 198.729  12.193   1
   3  -5  -3 192.265  10.631   5
  -3   5   3 203.041  10.331   1
   2  -5  -3 6.12828 1.42065   1
   2  -5  -3 7.83120 2.39560   5
   2  -5  -3 5.86120 2.21717   4
   2  -5  -3 7.49717 2.61859   1
  -2   5   3 7.51314 1.99301   2
  -2   5   3 6.73686 2.14120   1
   1  -5  -3 33.3802  3.8157   4
   1  -5  -3 33.1255  3.4348   1
   1  -5  -3 27.5102  2.6873   5
   1  -5  -3 33.6110  3.3995   1
  -1   5   3 27.6907  2.6272   5
  -1   5   3 32.3796  3.3049   1
  -1   5   3 35.6948  2.8889   2
  -1   5   3 28.4681  3.3306   4
   0  -5  -3 171.586   9.452   5
   0  -5  -3 170.366  12.074   4
   0  -5  -3 199.306  10.908   1
   0  -5  -3 189.610   9.185   1
   0   5   3 206.257   8.962   1
   0   5   3 167.740   8.513   2
   0   5   3 186.250  10.673   1
   0   5   3 184.650   8.611   5
   0   5   3 176.261  13.203   4
  -1  -5  -3 174.368   9.148   1
  -1  -5  -3 169.060  10.848   5
  -1  -5  -3 181.394  17.715   4
   1   5   3 149.977   9.544   4
   1   5   3 172.583   8.753   1
   1   5   3 164.607   7.615   1
  -2  -5  -3 62.3976  5.3186   3
  -2  -5  -3 81.2866  5.3713   1
  -2  -5  -3 70.6635  5.0350   4
  -2  -5  -3 59.9986  4.2009   2
   2   5   3 64.3686  4.1030   1
   2   5   3 60.5657  3.7189   2
   2   5   3 53.3011  4.6517   1
  -3  -5  -3 44.1682  4.4362   2
  -3  -5  -3 50.4340  4.1631   1
  -3  -5  -3 45.7164  3.0765   5
  -3  -5  -3 42.7396  5.8525   4
   3   5   3 47.7931  3.2960   1
   3   5   3 44.5629  5.8035   7
   3   5   3 46.1978  3.6472   2
   3   5   3 52.8430  3.3520   1
  -4  -5  -3 293.436  20.436   4
  -4  -5  -3 322.526  12.209   1
  -4  -5  -3 287.346  18.285   5
   4   5   3 311.903  18.935   1
   4   5   3 295.531  14.555   1
   4   5   3 288.201  22.706   7
   4   5   3 328.577  13.903   2
   4   5   3 298.026  18.626   3
  -5  -5  -3 185.533  19.157   5
  -5  -5  -3 235.600  19.664   4
  -5  -5  -3 250.927  12.762   7
  -5  -5  -3 265.150  17.830   1
   5   5   3 263.499  22.856   1
   5   5   3 229.885  12.298   3
   5   5   3 240.100   8.374   1
   5   5   3 250.491  12.130   2
  -6  -5  -3 114.702   8.910   1
  -6  -5  -3 99.6156 10.2707   4
  -6  -5  -3 115.035   7.684   7
   6   5   3 95.4234  6.8417   3
   6   5   3 112.185  10.228   1
   6   5   3 114.466   6.748   2
   6   5   3 115.560   6.939   1
  -7  -5  -3 267.465  21.262   4
  -7  -5  -3 260.864  14.322   7
   7   5   3 259.566  15.720   2
   7   5   3 262.208  15.350   3
   7   5   3 271.892  16.822   1
  -8  -5  -3 31.9180  6.3590   4
  -8  -5  -3 22.6723  5.5425   7
  -8  -5  -3 24.2607  6.1398   6
   8   5   3 31.9823  4.6805   3
   8   5   3 26.5800  3.1323   1
  -9  -5  -3 199.440  15.142   6
  -9  -5  -3 167.003  15.291   7
  -9  -5  -3 194.521  16.790   4
   9   5   3 177.360  14.796   3
 -10  -5  -3 69.2152 11.9230   6
 -10  -5  -3 73.3096 10.7953   7
 -10  -5  -3 45.3579  9.2865   4
  10   5   3 66.4780 10.2085   3
 -11  -5  -3 -3.7400  7.2335   4
  11   5   3 18.7107  7.7433   3
  10  -6  -3 28.2392  8.4857   3
 -10   6   3 43.1298  9.7130   7
   9  -6  -3 138.235  15.061   5
   9  -6  -3 126.296  14.834   3
  -9   6   3 143.444  13.231   7
   8  -6  -3 244.983  19.117   5
   8  -6  -3 219.163  20.810   1
   8  -6  -3 244.925  21.056   3
  -8   6   3 249.711  18.190   7
   7  -6  -3 626.438  66.145   1
   7  -6  -3 634.155  38.852   5
   7  -6  -3 720.994  53.979   3
  -7   6   3 653.909  41.681   7
   6  -6  -3 23.9474  3.3448   1
   6  -6  -3 23.9809  5.0858   3
   6  -6  -3 25.6824  4.7970   5
  -6   6   3 23.6004  4.6136   7
   5  -6  -3 183.330  12.873   1
   5  -6  -3 180.108  16.121   1
   5  -6  -3 216.768  16.456   3
   5  -6  -3 219.125  11.431   5
  -5   6   3 192.032  10.389   1
   4  -6  -3 21.4141  4.4811   4
   4  -6  -3 19.9106  3.2068   1
   4  -6  -3 28.6858  3.2889   1
   4  -6  -3 26.9702  3.8359   5
   4  -6  -3 25.6973  4.1327   3
  -4   6   3 30.6188  3.7899   1
   3  -6  -3 1467.93   94.15   4
   3  -6  -3 1414.68   80.62   1
   3  -6  -3 1340.16   70.29   5
   3  -6  -3 1418.21   79.30   1
  -3   6   3 1450.69   55.24   1
   2  -6  -3 2.57553 3.54620   1
   2  -6  -3 11.4542  3.4002   5
   2  -6  -3 4.23504 4.75492   4
  -2   6   3 2.20603 2.58134   1
  -2   6   3 2.05539 2.35524   2
   1  -6  -3 2866.83  156.83   1
   1  -6  -3 3299.90  231.90   4
   1  -6  -3 2771.78  180.34   5
  -1   6   3 3356.26  121.83   1
  -1   6   3 2990.96  162.13   5
  -1   6   3 2976.58  158.45   2
   0  -6  -3 21.0587  3.4984   4
   0  -6  -3 24.1907  2.5532   5
   0   6   3 21.4473  4.1835   1
   0   6   3 19.0773  2.6447   5
  -1  -6  -3 1.01482 2.09662   4
  -1  -6  -3 1.90499 0.90109   5
  -1  -6  -3 1.99560 2.52479   1
   1   6   3 -0.8418  1.9525   1
  -2  -6  -3 10.5927  2.7792   1
  -2  -6  -3 15.7058  3.2866   4
  -2  -6  -3 6.73920 1.17541   2
   2   6   3 5.61971 1.76102   1
   2   6   3 9.17133 1.83804   1
  -3  -6  -3 52.9791  3.2219   5
  -3  -6  -3 69.2213  6.7923   4
  -3  -6  -3 48.1993  4.5894   2
  -3  -6  -3 56.0639  4.5518   1
   3   6   3 51.9938  6.9720   7
   3   6   3 56.9687  4.5397   1
   3   6   3 61.6336  5.0271   1
  -4  -6  -3 54.9029  6.5950   4
  -4  -6  -3 53.2585  4.1355   5
  -4  -6  -3 58.0222  4.7684   1
   4   6   3 68.8079  4.8988   8
   4   6   3 53.8107  3.9025   1
   4   6   3 54.4547  3.8137   2
   4   6   3 54.8784  5.2149   1
  -5  -6  -3 -1.3542  1.8546   5
  -5  -6  -3 4.74419 2.24670   1
  -5  -6  -3 2.08330 4.22578   4
   5   6   3 1.95365 2.01625   1
   5   6   3 3.78787 2.59623   3
   5   6   3 4.50397 2.30974   2
   5   6   3 -0.2336  1.8998   1
  -6  -6  -3 22.1415  3.6177   1
  -6  -6  -3 26.2904  4.9214   4
   6   6   3 26.8998  3.7902   1
   6   6   3 25.0153  4.6235   3
  -7  -6  -3 98.5567  9.7731   4
   7   6   3 104.609   7.360   1
   7   6   3 98.7018  8.7003   3
  -8  -6  -3 75.8852 11.4202   4
  -8  -6  -3 91.1126  8.5169   7
   8   6   3 89.2845  7.5877   1
   8   6   3 86.9989 10.3676   3
  -9  -6  -3 10.1286  7.1529   6
  -9  -6  -3 6.70864 5.06530   7
  -9  -6  -3 11.7975  6.1497   4
   9   6   3 11.2013  6.1190   3
 -10  -6  -3 81.4179 10.5615   7
 -10  -6  -3 68.2886 11.5408   6
 -10  -6  -3 91.6109 15.7296   4
  10   6   3 87.1642 11.4919   3
 -11  -6  -3 20.0477  9.8580   4
  11   6   3 9.48646 8.81341   3
  10  -7  -3 -0.5819  6.2989   3
 -10   7   3 9.66263 6.57303   7
   9  -7  -3 16.8837  3.5103   1
   9  -7  -3 29.2071 12.6143   5
   9  -7  -3 25.1881  7.3122   3
   8  -7  -3 439.886  38.521   5
   8  -7  -3 410.813  36.358   3
   8  -7  -3 381.220  41.834   1
  -8   7   3 426.355  30.799   7
   7  -7  -3 133.508   9.888   1
   7  -7  -3 127.216  13.784   3
   7  -7  -3 135.582  13.025   5
  -7   7   3 141.307  11.153   7
   6  -7  -3 212.020  21.287   3
   6  -7  -3 255.514  13.826   5
   6  -7  -3 215.507  17.845   1
  -6   7   3 226.606  20.091   7
   5  -7  -3 43.9401  5.6748   5
   5  -7  -3 65.9921  7.0808   3
   5  -7  -3 57.3592  6.3904   4
   5  -7  -3 56.7619  6.6126   1
  -5   7   3 48.8106  5.3622   1
   4  -7  -3 1.45778 2.59901   3
   4  -7  -3 0.19353 3.01346   1
   4  -7  -3 13.0260  5.2362   4
   4  -7  -3 4.74915 2.92303   5
  -4   7   3 -0.2691  2.3596   1
   3  -7  -3 56.0635  4.9748   1
   3  -7  -3 48.9745  5.1352   4
   3  -7  -3 42.0411  5.1755   5
  -3   7   3 47.4831  4.0503   1
   2  -7  -3 616.143  49.595   4
   2  -7  -3 660.818  44.684   5
   2  -7  -3 606.107  36.906   1
  -2   7   3 600.163  22.245   1
  -2   7   3 604.599  41.162   2
   1  -7  -3 6.46257 1.92326   5
   1  -7  -3 6.50943 2.66347   4
   1  -7  -3 6.92172 2.67277   1
  -1   7   3 4.02316 1.26206   2
  -1   7   3 7.88569 2.75391   1
   0  -7  -3 3401.23  135.66   1
   0  -7  -3 3444.03  306.41   4
   0  -7  -3 3166.59  172.84   5
   0   7   3 3924.54  252.30   5
   0   7   3 3370.78  136.77   1
  -1  -7  -3 5.22703 2.19648   1
  -1  -7  -3 0.22378 1.04197   5
  -1  -7  -3 2.94815 2.86865   4
   1   7   3 2.07339 2.05145   1
  -2  -7  -3 2007.36   85.12   5
  -2  -7  -3 2206.33  154.99   4
  -2  -7  -3 1916.48   89.76   1
   2   7   3 1958.95   82.41   1
  -3  -7  -3 8.55388 1.00890   5
  -3  -7  -3 8.00464 1.61734   2
  -3  -7  -3 9.04836 2.52980   1
  -3  -7  -3 12.3200  3.2540   4
   3   7   3 12.3859  2.6636   1
  -4  -7  -3 266.398  16.281   5
  -4  -7  -3 322.287  20.286   1
  -4  -7  -3 222.698  25.311   2
  -4  -7  -3 364.172  34.775   4
   4   7   3 312.987  12.173   1
  -5  -7  -3 98.7962 13.1355   4
  -5  -7  -3 85.0617  8.1429   1
   5   7   3 101.049   6.065   1
  -6  -7  -3 33.7931  6.7615   1
  -6  -7  -3 38.2374  5.8779   4
   6   7   3 48.7961  4.7018   1
   6   7   3 42.1185  5.4934   3
  -7  -7  -3 -0.5805  4.2559   4
   7   7   3 -3.4805  3.7882   3
   7   7   3 4.37239 2.49235   1
  -8  -7  -3 7.75256 6.31107   4
   8   7   3 8.16801 4.87215   3
   8   7   3 1.46905 2.96609   1
  -9  -7  -3 140.094  15.836   4
  -9  -7  -3 146.988  14.596   6
   9   7   3 143.807  18.050   3
   9   7   3 111.383  11.226   1
 -10  -7  -3 1.56041 6.73727   4
 -10  -7  -3 -5.1421  7.1156   6
  10   7   3 6.68578 7.00779   3
 -11  -7  -3 -10.129   5.821   6
 -11  -7  -3 14.2303 11.1446   4
  11   7   3 -9.3500  8.2413   3
  10  -8  -3 19.3016  8.3885   3
 -10   8   3 12.3978  8.9693   7
   9  -8  -3 4.26481 6.87183   5
   9  -8  -3 6.91364 3.31815   1
   9  -8  -3 10.6457  8.7189   3
  -9   8   3 17.6580  7.0670   7
   8  -8  -3 117.723  16.174   3
   8  -8  -3 165.057  17.430   5
   8  -8  -3 131.804  15.254   1
  -8   8   3 159.065  16.531   7
   7  -8  -3 72.7198 10.3243   3
   7  -8  -3 76.6518  8.6970   5
   7  -8  -3 55.4604  8.0204   1
  -7   8   3 61.8246  8.2187   7
   6  -8  -3 12.8981  4.6953   3
   6  -8  -3 5.97765 4.75718   5
   6  -8  -3 11.8631  4.5503   1
   5  -8  -3 210.652  15.961   4
   5  -8  -3 207.373  22.648   3
   5  -8  -3 215.180  16.582   1
   5  -8  -3 243.435  17.030   5
  -5   8   3 178.539  13.061   1
   4  -8  -3 128.206  11.454   3
   4  -8  -3 97.5223  5.8019   6
   4  -8  -3 141.809  12.724   4
   4  -8  -3 110.892   9.375   1
   4  -8  -3 142.721  10.365   5
  -4   8   3 120.485   8.677   1
   3  -8  -3 3.62011 2.42921   1
   3  -8  -3 9.61616 4.16182   4
   3  -8  -3 3.16740 2.27458   5
  -3   8   3 2.46179 2.54168   1
   2  -8  -3 16.2342  2.9537   5
   2  -8  -3 18.3027  3.6306   4
   2  -8  -3 20.5601  3.8597   1
  -2   8   3 16.3753  2.7388   1
  -2   8   3 14.7018  2.7257   2
   1  -8  -3 0.58668 2.16553   1
   1  -8  -3 -0.4437  1.8403   5
   1  -8  -3 4.36196 2.21482   4
  -1   8   3 1.82728 2.33239   1
  -1   8   3 2.11497 1.33386   2
   0  -8  -3 11.7849  3.8318   4
   0  -8  -3 9.42970 1.98331   5
   0  -8  -3 15.7104  4.7192   1
   0   8   3 11.2127  2.5658   5
   0   8   3 10.0552  3.5031   1
  -1  -8  -3 741.719  34.513   1
  -1  -8  -3 734.613  44.607   5
  -1  -8  -3 778.816  66.202   4
   1   8   3 703.685  38.740   1
  -2  -8  -3 39.2176  4.2867   1
  -2  -8  -3 35.1534  6.0603   4
  -2  -8  -3 33.2909  2.2548   5
   2   8   3 49.4671  4.8096   1
  -3  -8  -3 2092.93   99.14   5
  -3  -8  -3 1836.91  161.73   2
  -3  -8  -3 2355.80  258.57   4
  -3  -8  -3 1686.48   77.68   5
  -3  -8  -3 2216.25   87.51   1
   3   8   3 2145.53   82.32   1
  -4  -8  -3 18.4932  1.7887   5
  -4  -8  -3 27.2410  4.8772   4
  -4  -8  -3 31.1255  4.4953   1
   4   8   3 29.7003  4.2997   1
  -5  -8  -3 386.616  37.806   1
  -5  -8  -3 365.120  21.158   4
   5   8   3 386.881  16.187   1
  -6  -8  -3 20.4742  5.8422   4
   6   8   3 15.3206  3.2331   1
  -7  -8  -3 5.75602 5.83949   4
   7   8   3 11.9697  3.4279   1
  -8  -8  -3 52.9340  9.3182   4
   8   8   3 49.3876  6.4868   1
   8   8   3 53.4592  9.4553   3
  -9  -8  -3 8.64410 7.91795   4
   9   8   3 9.94779 6.48587   3
   9   8   3 11.3564  4.2867   1
 -10  -8  -3 7.10654 8.57594   4
 -10  -8  -3 1.76473 6.78662   6
  10   8   3 4.61033 7.31393   3
   9  -9  -3 70.6163 10.2855   5
   9  -9  -3 50.1302 10.4776   3
   9  -9  -3 48.8247  8.3838   1
  -9   9   3 61.3753 11.8374   7
   8  -9  -3 68.8217  7.9953   1
   8  -9  -3 75.7479 12.0243   3
   8  -9  -3 71.2375 11.0404   5
  -8   9   3 51.1923 10.8324   7
   7  -9  -3 -1.4533  5.8286   5
   7  -9  -3 3.50064 4.84015   3
   7  -9  -3 1.66833 4.58594   1
  -7   9   3 1.50395 5.34555   7
   6  -9  -3 1.34529 3.75558   1
   6  -9  -3 6.53516 5.34023   3
   6  -9  -3 -7.9418  3.7415   5
   5  -9  -3 28.9298  6.1913   4
   5  -9  -3 28.4754  6.1869   1
   5  -9  -3 38.2616  5.4016   3
   5  -9  -3 31.6290  5.5532   5
  -5   9   3 36.3203  5.5948   1
   4  -9  -3 47.6811  5.9465   5
   4  -9  -3 59.8317  6.5655   1
   4  -9  -3 45.0321  5.6177   3
   4  -9  -3 51.7371  6.1723   4
  -4   9   3 50.3091  5.4813   1
   3  -9  -3 16.6445  4.3590   5
   3  -9  -3 8.87237 3.56594   4
   3  -9  -3 10.5377  2.7766   1
  -3   9   3 13.4222  3.4701   1
   2  -9  -3 603.344  33.613   5
   2  -9  -3 543.220  57.216   4
   2  -9  -3 560.115  36.037   1
  -2   9   3 548.508  30.561   1
  -2   9   3 519.321  65.299   2
   1  -9  -3 3.92478 2.74059   4
   1  -9  -3 5.26677 2.67488   1
   1  -9  -3 4.01259 2.25524   5
  -1   9   3 2.29385 2.05861   1
   0  -9  -3 61.7326  5.1805   1
   0  -9  -3 67.3687  7.3966   4
   0  -9  -3 63.6424  5.3758   5
   0   9   3 62.2143  6.2626   5
   0   9   3 57.4515  5.4709   1
  -1  -9  -3 -0.2803  1.6803   5
  -1  -9  -3 -0.0156  3.5508   1
  -1  -9  -3 -2.0832  2.9096   4
   1   9   3 5.36193 3.46293   1
  -2  -9  -3 498.150  49.331   4
  -2  -9  -3 456.608  28.125   5
  -2  -9  -3 465.681  29.251   1
   2   9   3 467.808  25.602   1
  -3  -9  -3 44.8051  5.5217   1
  -3  -9  -3 58.2661  7.5628   4
   3   9   3 43.9289  4.9328   1
  -4  -9  -3 -2.6307  2.5041   1
  -4  -9  -3 4.73452 3.87995   4
   4   9   3 2.13574 2.46361   1
  -5  -9  -3 147.927  13.516   1
  -5  -9  -3 143.890  15.501   4
   5   9   3 151.213  11.164   1
  -6  -9  -3 13.6184  6.0236   4
   6   9   3 14.8943  4.0972   1
  -7  -9  -3 59.3030  9.5582   4
   7   9   3 43.0969  5.3820   1
  -8  -9  -3 40.9443  9.1994   4
   8   9   3 29.2912  4.6839   1
  -9  -9  -3 4.14893 7.49979   4
   9   9   3 2.65369 4.07002   1
 -10  -9  -3 8.68248 7.56656   6
 -10  -9  -3 0.47252 9.12599   4
   9 -10  -3 55.1332  8.7364   3
   9 -10  -3 44.2442 13.5824   5
   9 -10  -3 51.1082  8.9137   1
  -9  10   3 72.4675 12.4518   7
   8 -10  -3 -4.7967  4.2720   1
   8 -10  -3 21.0201  7.9112   5
   8 -10  -3 1.98012 6.45461   3
  -8  10   3 -0.6817  6.1035   7
   7 -10  -3 -1.4130  5.3757   3
   7 -10  -3 0.12665 4.88848   1
   7 -10  -3 -0.9679  5.3689   5
  -7  10   3 3.38462 5.26258   7
   6 -10  -3 3.59084 4.05150   1
   6 -10  -3 4.98810 5.11539   5
   6 -10  -3 3.60683 4.27290   3
   5 -10  -3 179.269  18.692   3
   5 -10  -3 205.835  17.554   4
   5 -10  -3 188.849  17.388   5
   5 -10  -3 179.308  18.758   1
   4 -10  -3 56.7534  7.7775   5
   4 -10  -3 57.4665  7.0862   1
   4 -10  -3 67.4764  9.2607   3
   4 -10  -3 45.2285  6.6773   4
  -4  10   3 62.0009  8.2650   1
   3 -10  -3 49.9940  6.7873   5
   3 -10  -3 45.1302  6.6724   4
   3 -10  -3 54.0733  5.4999   1
  -3  10   3 51.7195  6.0699   1
   2 -10  -3 1.70344 2.26308   5
   2 -10  -3 2.68151 3.94847   1
   2 -10  -3 3.99145 3.16021   4
  -2  10   3 2.49010 2.86883   1
   1 -10  -3 230.508  14.139   1
   1 -10  -3 231.720  13.620   5
   1 -10  -3 229.883  22.435   4
  -1  10   3 240.553  13.546   1
   0 -10  -3 12.6196  4.2391   1
   0 -10  -3 12.2200  3.9117   4
   0 -10  -3 4.69620 2.69577   5
   0  10   3 5.66101 3.92583   1
  -1 -10  -3 136.585   9.979   5
  -1 -10  -3 143.459  12.697   4
  -1 -10  -3 143.538  10.492   1
   1  10   3 169.723  10.115   1
  -2 -10  -3 28.3147  5.7193   4
  -2 -10  -3 22.8246  2.2368   5
  -2 -10  -3 24.2295  5.0948   1
   2  10   3 24.9494 13.1279   1
  -3 -10  -3 45.5625  6.3043   1
  -3 -10  -3 42.8157  7.7693   4
   3  10   3 59.3125  5.3536   1
  -4 -10  -3 54.5146  6.9028   1
  -4 -10  -3 50.9751  8.6371   4
   4  10   3 50.7433  9.8356   1
  -5 -10  -3 284.718  27.828   4
  -5 -10  -3 281.044  23.605   1
   5  10   3 311.020  18.506   1
  -6 -10  -3 1.62223 4.66465   4
   6  10   3 6.07439 3.33728   1
  -7 -10  -3 60.5914  9.6111   4
   7  10   3 64.3368  7.1265   1
  -8 -10  -3 99.4470 13.2867   4
   8  10   3 101.254  11.569   1
  -9 -10  -3 24.8594  8.0825   4
   9  10   3 15.5411  4.9328   1
   8 -11  -3 261.633  24.887   5
   8 -11  -3 253.933  29.479   1
   8 -11  -3 256.546  35.831   3
  -8  11   3 303.767  27.394   7
   7 -11  -3 6.04965 7.52502   5
   7 -11  -3 1.81840 6.86979   3
   7 -11  -3 8.13768 5.26799   1
   6 -11  -3 6.01694 6.07416   3
   6 -11  -3 4.30273 3.98259   1
   6 -11  -3 16.6348  6.6950   5
   5 -11  -3 58.7264  8.3088   5
   5 -11  -3 41.7468  7.5603   1
   5 -11  -3 54.6208  7.3230   4
   5 -11  -3 70.5960  7.7135   3
   4 -11  -3 107.647  10.205   5
   4 -11  -3 92.9645 10.8665   1
   4 -11  -3 119.155  16.256   3
   4 -11  -3 106.610  13.593   4
  -4  11   3 80.9537  9.2206   1
   3 -11  -3 23.7930  6.1665   1
   3 -11  -3 20.7409  5.3258   4
   3 -11  -3 21.2193  4.2902   5
  -3  11   3 17.7238  4.7398   1
   2 -11  -3 395.312  29.602   5
   2 -11  -3 381.014  34.445   4
   2 -11  -3 405.023  30.352   1
  -2  11   3 407.891  23.823   1
   1 -11  -3 4.05902 2.71142   5
   1 -11  -3 4.51541 4.15065   1
   1 -11  -3 4.44127 3.77763   4
  -1  11   3 4.49024 3.77001   1
   0 -11  -3 1.67906 3.18273   4
   0 -11  -3 -1.1221  3.4658   1
   0  11   3 6.38085 2.86857   1
  -1 -11  -3 37.1541  5.7117   4
  -1 -11  -3 34.0841  3.5209   5
  -1 -11  -3 40.6343  6.0020   1
   1  11   3 35.2001  4.5944   1
  -2 -11  -3 107.056  11.455   1
  -2 -11  -3 101.201  12.345   4
   2  11   3 105.331   9.729   1
  -3 -11  -3 145.141  11.620   4
  -3 -11  -3 129.651  12.148   1
   3  11   3 136.515   9.926   1
  -4 -11  -3 275.156  24.950   1
  -4 -11  -3 299.638  28.023   4
   4  11   3 321.363  20.590   1
  -5 -11  -3 27.1514  6.2179   1
  -5 -11  -3 14.8802  5.4786   4
   5  11   3 31.4030  6.1583   1
  -6 -11  -3 43.4104  7.6888   4
   6  11   3 38.5379  6.1246   1
  -7 -11  -3 7.80477 6.05529   4
   7  11   3 -0.3446  4.8228   1
  -8 -11  -3 32.3528  9.2935   4
   8  11   3 18.9840  5.6616   1
  -9 -11  -3 14.3727  9.0366   4
   9  11   3 12.4701  6.2934   1
   8 -12  -3 1.31821 6.81491   1
   8 -12  -3 1.95156 8.44478   5
  -8  12   3 1.25480 7.71579   7
   7 -12  -3 134.299  14.859   5
   7 -12  -3 154.511  20.522   1
   6 -12  -3 17.4147  7.2731   5
   6 -12  -3 6.58077 5.27224   3
   6 -12  -3 11.7814  5.7626   1
   5 -12  -3 73.5646  8.6053   1
   5 -12  -3 58.8033  9.6878   5
   5 -12  -3 71.2409  9.4651   4
   5 -12  -3 69.8390 10.3894   3
   4 -12  -3 23.3167  6.5500   3
   4 -12  -3 14.0065  4.6286   5
   4 -12  -3 18.1904  6.1514   1
   4 -12  -3 13.8459  5.4548   4
  -4  12   3 14.6357  4.8795   1
   3 -12  -3 50.4973  6.7931   1
   3 -12  -3 51.3052  6.9274   5
   3 -12  -3 48.7035  7.6848   4
  -3  12   3 52.4107  6.9881   1
   2 -12  -3 2.48094 3.98356   5
   2 -12  -3 4.24152 4.83323   4
   2 -12  -3 3.11000 4.17526   1
  -2  12   3 2.13807 5.14886   1
   1 -12  -3 95.1238 10.9525   4
   1 -12  -3 78.4642  7.8246   5
   1 -12  -3 90.4983 10.7578   1
  -1  12   3 96.2855  9.7713   1
   0 -12  -3 19.3165  5.0081   4
   0 -12  -3 10.6231  5.0130   1
   0  12   3 7.10590 4.32293   1
  -1 -12  -3 223.671  18.728   1
  -1 -12  -3 184.166  23.131   4
   1  12   3 171.248  12.904   1
  -2 -12  -3 2.54849 3.77124   1
  -2 -12  -3 -1.8809  4.8833   4
   2  12   3 9.25248 3.40694   1
  -3 -12  -3 215.790  23.334   4
  -3 -12  -3 234.420  19.934   1
   3  12   3 234.239  16.959   1
  -4 -12  -3 28.1409  6.9686   1
  -4 -12  -3 12.3060  5.8741   4
   4  12   3 20.5510  5.5562   1
  -5 -12  -3 89.6886 12.3339   1
  -5 -12  -3 90.2021 11.5435   4
   5  12   3 110.179  10.401   1
  -6 -12  -3 13.1362  7.5531   4
   6  12   3 25.0549  5.4136   1
  -7 -12  -3 14.0826  7.0033   4
   7  12   3 21.6296  5.5346   1
  -8 -12  -3 31.3234  9.0268   4
   8  12   3 33.2989  6.8376   1
   7 -13  -3 -0.5692  7.1575   1
   7 -13  -3 7.39956 8.93367   5
   6 -13  -3 29.3934  7.0945   1
   6 -13  -3 24.2702  8.3616   5
   5 -13  -3 2.37610 4.91008   5
   5 -13  -3 20.0659  6.0597   1
   4 -13  -3 1.77926 4.31544   1
   4 -13  -3 9.20034 4.79980   5
   4 -13  -3 3.87409 5.37767   4
  -4  13   3 8.99046 5.63698   1
   3 -13  -3 9.45594 4.41433   1
   3 -13  -3 3.47746 4.03599   5
   3 -13  -3 7.40298 4.93053   4
  -3  13   3 0.57945 3.64067   1
   2 -13  -3 20.7259  4.7283   5
   2 -13  -3 17.5514  5.0830   4
   2 -13  -3 37.8435  7.1736   1
  -2  13   3 28.8100  7.0838   1
   1 -13  -3 3.73367 4.41654   1
   1 -13  -3 -6.7748  3.7224   4
  -1  13   3 2.31940 4.48348   1
   0 -13  -3 117.686  14.730   4
   0 -13  -3 106.553  12.061   1
   0  13   3 117.796  12.022   1
  -1 -13  -3 0.50156 4.41616   1
  -1 -13  -3 4.19654 4.15285   4
   1  13   3 5.59680 3.88412   1
  -2 -13  -3 0.75697 4.98530   4
  -2 -13  -3 -3.6178  4.2887   1
   2  13   3 1.68128 4.11738   1
  -3 -13  -3 39.9346  7.8155   4
  -3 -13  -3 26.3732  6.7293   1
   3  13   3 31.6281  6.5537   1
  -4 -13  -3 62.6241  7.2846   1
  -4 -13  -3 62.7834  9.4624   4
   4  13   3 53.9914  8.5518   1
  -5 -13  -3 12.8782  7.2733   4
   5  13   3 14.0969  5.5207   1
  -6 -13  -3 3.58667 6.60936   4
   6  13   3 18.9714  5.1883   1
  -7 -13  -3 2.19488 6.60484   4
   7  13   3 -2.5209  4.7019   1
  -8 -13  -3 39.1777 10.5771   4
   8  13   3 49.4236  9.6850   1
   6 -14  -3 6.19493 6.70101   5
   6 -14  -3 1.48920 6.24986   1
   5 -14  -3 2.75844 3.98407   1
   5 -14  -3 8.09719 5.98158   5
   4 -14  -3 8.49275 6.21061   1
   4 -14  -3 8.18647 5.39848   5
   3 -14  -3 35.2138 88.7321   1
   3 -14  -3 11.3466  6.6812   4
  -3  14   3 1.17656 6.12464   1
   2 -14  -3 -0.3087  5.2539   4
   2 -14  -3 -1.9640  5.7802   1
  -2  14   3 5.97681 5.00621   1
   1 -14  -3 125.118  14.250   1
   1 -14  -3 87.5982 13.5019   4
  -1  14   3 117.865  12.768   1
   0 -14  -3 8.26342 5.68566   4
   0 -14  -3 11.2547  6.3078   1
   0  14   3 5.67490 6.16903   1
  -1 -14  -3 9.38176 7.00861   4
  -1 -14  -3 9.17808 6.37408   1
   1  14   3 13.0759  4.3206   1
  -2 -14  -3 2.51141 5.54814   4
  -2 -14  -3 3.43732 3.73801   1
   2  14   3 5.52757 3.74215   1
  -3 -14  -3 94.7790 13.6245   4
  -3 -14  -3 84.8305 10.8143   1
   3  14   3 108.674  12.378   1
  -4 -14  -3 4.07435 6.31397   1
  -4 -14  -3 5.26893 6.25511   4
   4  14   3 -0.8059  4.2704   1
  -5 -14  -3 22.8379  8.2712   4
  -6 -14  -3 11.3297  7.6613   4
   6  14   3 15.7982  3.3539   1
  -7 -14  -3 1.96208 8.21804   4
   7  14   3 -1.0621  6.4104   1
   5 -15  -3 20.9525 11.9978   1
   4 -15  -3 12.0761  4.9846   1
   3 -15  -3 5.55514 4.63982   1
  -3  15   3 4.42969 6.12765   1
   2 -15  -3 103.982  16.323   4
   2 -15  -3 95.3678 12.2509   1
  -2  15   3 81.4875 11.7209   1
   1 -15  -3 3.42914 5.95995   4
   1 -15  -3 8.69074 6.51581   1
  -1  15   3 4.54560 3.63222   1
   0 -15  -3 202.987  24.217   1
   0 -15  -3 215.242  25.896   4
   0  15   3 173.591  25.083   1
  -1 -15  -3 -2.5377  5.3085   4
  -1 -15  -3 2.82728 5.45168   1
   1  15   3 0.01482 5.79262   1
  -2 -15  -3 277.852  28.390   1
  -2 -15  -3 241.708  25.056   4
   2  15   3 273.618  30.098   1
  -3 -15  -3 13.0344  6.9926   1
  -3 -15  -3 6.52471 6.64335   4
   3  15   3 5.35854 4.53431   1
  -4 -15  -3 1.29495 6.07824   1
  -4 -15  -3 3.54542 6.89461   4
   4  15   3 -0.9234  3.8013   1
  -5 -15  -3 2.06258 8.89278   4
   5  15   3 1.12280 3.66845   1
  -6 -15  -3 5.63047 6.93136   4
   6  15   3 -4.7950  5.9502   1
   4 -16  -3 3.09488 9.28866   1
   3 -16  -3 44.6842  9.3700   1
   2 -16  -3 12.0872  5.3938   1
  -2  16   3 -2.7041  5.7973   1
   1 -16  -3 150.769  20.440   1
  -1  16   3 130.231  20.955   1
   0 -16  -3 0.50777 7.13840   4
   0 -16  -3 1.54792 4.24740   1
   0  16   3 9.62292 6.06148   1
  -1 -16  -3 10.1935  7.5256   4
  -1 -16  -3 4.25209 5.70639   1
   1  16   3 -0.4133  4.2365   1
  -2 -16  -3 17.6673  8.2228   4
  -2 -16  -3 23.0497  5.1410   1
   2  16   3 11.7303  6.8726   1
  -3 -16  -3 167.640  19.264   1
  -3 -16  -3 229.533  28.137   4
   3  16   3 184.930  26.212   1
  -4 -16  -3 6.24799 7.83937   4
   4  16   3 0.61374 4.87541   1
   1 -17  -3 2.81177 5.20341   1
  -1  17   3 4.47167 9.14987   1
   0 -17  -3 0.84585 5.41603   1
   0  17   3 3.64660 7.49658   1
  -1 -17  -3 5.77075 9.49380   1
   1  17   3 5.39889 6.51768   1
  -2 -17  -3 102.841  13.644   1
  -2 -17  -3 85.7625 13.4111   4
   2  17   3 61.4532 13.5815   1
   1  16  -4 -13.026   8.611   1
  -1 -16   4 -6.5333  8.7225   1
   0  16  -4 15.1074  7.6767   1
   0 -16   4 17.2800  8.1157   1
  -1  16  -4 8.76604 9.38689   1
   1 -16   4  1.7225 10.7063   1
   4  15  -4 0.63437 7.03768   1
  -4 -15   4 3.96924 7.32401   1
   3  15  -4 4.18992 6.19440   1
  -3 -15   4 6.88352 7.67658   1
   2  15  -4 5.33213 7.19409   1
  -2 -15   4 7.79854 8.26080   1
   1  15  -4 105.025  14.596   1
  -1 -15   4 102.867  16.217   1
   0  15  -4 0.14808 5.55846   1
   0 -15   4 -3.5424  6.9398   1
  -1  15  -4 76.5139 13.8208   1
   1 -15   4 64.1577 11.2334   1
  -2  15  -4 8.44807 6.01783   1
   2 -15   4 -13.360   6.332   1
   3 -15   4 110.504  15.349   1
   4 -15   4 3.71083 7.54970   1
   5  14  -4 0.55291 7.90802   1
  -5 -14   4 4.48278 9.80942   4
   4  14  -4 22.3630  8.9940   1
  -4 -14   4 30.4465  8.0895   4
  -4 -14   4 23.7357  6.9348   1
   3  14  -4 14.2569  8.9597   1
  -3 -14   4 17.2256  7.3159   1
  -3 -14   4 18.7343  6.7866   4
   2  14  -4 4.22222 6.34746   1
  -2 -14   4 3.64852 6.83726   1
   1  14  -4 -3.7403  4.7154   1
  -1 -14   4 -4.0486  5.5846   1
   0  14  -4 125.921  17.817   1
   0 -14   4 148.296  15.550   1
  -1  14  -4 14.3674  6.7317   1
   1 -14   4 9.62401 7.11066   1
  -2  14  -4 126.837  16.541   1
   2 -14   4 119.705  13.736   1
  -3  14  -4 -0.0316  6.9859   1
   3 -14   4 -8.4214  6.3197   5
   3 -14   4 -10.240   6.761   1
   4 -14   4 35.1723  8.8945   5
   4 -14   4 36.6202 10.4091   1
   5 -14   4 13.4993  8.5998   5
   5 -14   4 -0.7492  4.8793   1
   6  13  -4 3.41160 6.59816   1
  -6 -13   4 1.88299 7.09384   4
   5  13  -4 1.11437 5.92778   1
  -5 -13   4 0.51229 6.04259   4
   4  13  -4 -5.0129  5.7605   1
  -4 -13   4 4.55614 5.84688   4
   3  13  -4 141.010  15.688   1
  -3 -13   4 140.193  18.843   4
   2  13  -4 14.4931  6.5535   1
  -2 -13   4 8.59557 5.93470   1
  -2 -13   4 16.0203  7.4016   4
   1  13  -4 292.975  28.668   1
  -1 -13   4 310.588  28.363   1
  -1 -13   4 236.909  24.683   4
   0  13  -4 20.4893  7.0680   1
   0 -13   4 14.8614  5.3096   1
  -1  13  -4 167.014  19.371   1
   1 -13   4 153.084  15.401   5
   1 -13   4 196.120  16.318   1
  -2  13  -4 11.7063  5.3390   1
   2 -13   4 7.72933 5.87022   1
  -3  13  -4 71.3934 12.5086   1
   3 -13   4 69.4696 10.1876   5
   3 -13   4 51.8599  8.4955   1
   4 -13   4 9.70437 6.16203   1
   4 -13   4 -5.9339  4.9819   5
   5 -13   4 114.693  14.093   5
   5 -13   4 113.936  15.764   1
   6 -13   4 -2.7451  6.9339   1
   6 -13   4 1.28219 6.92895   5
   7  12  -4 1.89607 5.53631   1
  -7 -12   4 -0.7930  6.9233   4
   6  12  -4 41.6965  9.5681   1
  -6 -12   4 25.7657  8.9762   4
   5  12  -4 15.0664  6.4811   1
  -5 -12   4 14.7366  5.6402   4
  -5 -12   4 -1.5669  6.7064   1
   4  12  -4 -5.2831  5.0958   1
  -4 -12   4 -2.2319  5.0976   4
  -4 -12   4 5.41349 5.05860   1
   3  12  -4 36.4626  6.7433   1
  -3 -12   4 32.5275  6.5483   1
   2  12  -4 2.85655 5.67561   1
  -2 -12   4 8.91100 6.26113   1
  -2 -12   4 2.50341 4.98834   4
   1  12  -4 14.2972  6.3890   1
  -1 -12   4 10.5789  5.3053   1
  -1 -12   4 14.0954  6.0473   4
   0  12  -4 369.104  33.755   1
   0 -12   4 312.193  34.845   5
   0 -12   4 390.056  29.505   1
   0 -12   4 326.755  38.216   4
  -1  12  -4 1.22077 4.01846   1
   1 -12   4 2.71136 4.49321   1
   1 -12   4 -2.9461  4.1707   5
  -2  12  -4 45.7212  8.2153   1
   2 -12   4 30.1191  8.0688   5
   2 -12   4 45.2149  7.4903   1
  -3  12  -4 9.76385 4.61128   1
   3 -12   4 11.7398  5.2766   5
   3 -12   4 9.62714 4.84192   1
   4 -12   4 0.25322 5.25157   5
   4 -12   4 0.99298 5.53197   1
   5 -12   4 -4.6638  5.3688   5
   5 -12   4 -0.9576  5.0588   1
   6 -12   4 24.3169  6.8330   1
   6 -12   4 21.8316  8.0055   5
   7 -12   4 30.8304 10.0031   5
   7 -12   4 15.4863  6.1392   1
   8  11  -4 5.67021 6.86709   1
  -8 -11   4 6.23074 8.92402   4
   7  11  -4 66.5972 10.4007   1
  -7 -11   4 71.4851 10.5950   4
   6  11  -4 20.3139  5.6643   1
  -6 -11   4 8.44000 6.85661   4
   5  11  -4 153.916  13.990   1
  -5 -11   4 157.861  15.978   4
  -5 -11   4 154.757  17.731   1
   4  11  -4 0.82873 4.50526   1
  -4 -11   4 1.85460 4.69026   4
  -4 -11   4 4.25220 4.14482   1
   3  11  -4 190.720  16.386   1
  -3 -11   4 187.437  20.700   4
  -3 -11   4 180.953  15.789   1
   2  11  -4 -8.2924  4.3700   1
  -2 -11   4 0.83443 5.16799   1
  -2 -11   4 -4.6768  3.4997   4
  -2 -11   4 -1.5183  2.9923   5
   1  11  -4 62.3081  8.0241   1
  -1 -11   4 69.3272  8.2634   1
  -1 -11   4 83.3174  9.0177   4
  -1 -11   4 64.7615  8.1150   5
   0  11  -4 3.58404 4.41203   1
   0 -11   4 10.3965  5.2187   1
   0 -11   4 3.91030 3.06145   5
   0 -11   4 1.40044 4.03474   4
  -1  11  -4 -1.5520  4.4097   1
   1 -11   4 1.07010 3.48089   4
   1 -11   4 4.21736 3.85150   5
  -2  11  -4 13.8931  4.8479   1
   2 -11   4 5.85721 4.08755   5
   2 -11   4 13.7206  4.9163   1
   2 -11   4 9.01906 6.56143   4
  -3  11  -4 11.8804  5.0101   1
   3 -11   4 13.9220  5.1585   5
   3 -11   4 23.6603  5.1584   1
  -4  11  -4 3.94168 4.25396   1
   4 -11   4 11.7282  4.5230   1
   4 -11   4 10.2742  6.5981   5
   5 -11   4 34.3591  6.1746   1
   5 -11   4 30.4738  6.7126   5
   6 -11   4 -0.7121  5.8148   5
   6 -11   4 3.07894 4.39555   1
   7 -11   4 18.9187  7.6558   5
   7 -11   4 8.99226 5.44619   1
   8 -11   4 4.91545 8.60733   5
   8 -11   4 -0.3812  5.7517   1
   9  10  -4 -3.6543  6.1332   1
  -9 -10   4 10.4975  9.4606   4
   8  10  -4 71.8940 11.6314   1
   8  10  -4 72.7696 12.1806   3
  -8 -10   4 72.3157 11.1213   4
   7  10  -4 -2.0618  4.6426   1
  -7 -10   4 7.54840 7.10878   4
   6  10  -4 22.0506  5.7784   1
  -6 -10   4 14.6042  6.5499   4
   5  10  -4 -2.9195  3.6440   1
  -5 -10   4 6.16011 6.34486   4
  -5 -10   4 1.34574 4.51367   1
   4  10  -4 -4.1031  4.3467   1
  -4 -10   4 -0.2562  4.8617   1
  -4 -10   4 5.01545 4.31269   4
   3  10  -4 2.56939 3.99432   1
  -3 -10   4 0.32016 3.34215   5
  -3 -10   4 -3.4919  4.5210   1
  -3 -10   4 -5.7866  3.4286   4
   2  10  -4 67.0153  6.9084   1
  -2 -10   4 76.5131 11.1126   4
  -2 -10   4 73.2519  8.9886   5
  -2 -10   4 82.2028  7.9271   1
   1  10  -4 8.89162 3.30959   1
  -1 -10   4 4.20709 2.95450   5
  -1 -10   4 2.02232 3.58866   4
  -1 -10   4 1.97748 3.81431   1
   0  10  -4 51.7505  5.7174   1
   0 -10   4 57.6457  6.8739   4
   0 -10   4 48.8511  6.4389   5
   0 -10   4 38.4060  4.7951   2
   0 -10   4 47.5270  6.0628   1
  -1  10  -4 4.52826 3.24329   1
   1 -10   4 1.77096 2.85370   4
   1 -10   4 4.50916 3.25672   5
   1 -10   4 11.5966  3.7434   1
   1 -10   4 7.06498 2.15274   2
  -2  10  -4 408.592  26.491   1
   2 -10   4 423.503  28.998   1
   2 -10   4 376.792  34.987   5
   2 -10   4 357.628  39.620   4
   2 -10   4 339.906  28.362   2
  -3  10  -4 2.10730 4.11193   1
   3 -10   4 4.08924 3.69773   1
   3 -10   4 5.94407 3.83896   5
   3 -10   4 1.95005 3.09488   4
   3 -10   4 -0.0351  3.4930   2
  -4  10  -4 346.912  31.545   1
   4 -10   4 329.410  26.257   2
   4 -10   4 344.046  35.368   1
   4 -10   4 365.105  38.610   5
   5 -10   4 -8.6497  3.9634   2
   5 -10   4 1.41917 3.82085   1
   5 -10   4 8.92723 5.90173   5
   6 -10   4 -0.9917  4.4020   2
   6 -10   4 1.92746 6.15193   5
   6 -10   4 7.69560 5.30152   1
   7 -10   4 6.94904 5.84943   2
   7 -10   4 6.93149 4.15579   1
   7 -10   4 4.79549 5.85450   5
   8 -10   4 12.7813  5.4366   1
   8 -10   4 10.4896  6.2461   2
   8 -10   4 3.32776 5.70851   5
   9 -10   4 35.2281 10.2443   5
   9 -10   4 42.4846  7.4184   2
   9   9  -4 24.9332  7.3321   3
   9   9  -4 12.5023  5.9699   1
  -9  -9   4 23.7210  8.7716   4
   8   9  -4 17.6322  6.8390   3
   8   9  -4 28.1808  6.0008   1
  -8  -9   4 26.1099  8.7880   4
   7   9  -4 18.7577  5.4402   1
   7   9  -4 -2.5315  4.5063   3
  -7  -9   4 6.91700 6.98945   4
   6   9  -4 6.11569 3.93449   1
   6   9  -4 -2.9050  3.7997   3
  -6  -9   4 10.3258  5.2199   4
   5   9  -4 451.190  27.012   1
  -5  -9   4 515.810  37.735   1
  -5  -9   4 482.152  39.792   4
   4   9  -4 1.92810 3.53783   1
  -4  -9   4 5.48751 4.25344   4
  -4  -9   4 -3.2749  3.9166   1
   3   9  -4 78.4439  7.5740   1
  -3  -9   4 68.0869  8.9570   1
  -3  -9   4 65.0210  8.5138   5
  -3  -9   4 82.8876  8.9868   4
   2   9  -4 31.3095  5.6420   1
  -2  -9   4 36.6196  5.9079   1
  -2  -9   4 24.7880  5.2755   4
  -2  -9   4 24.1927  3.5861   5
   1   9  -4 15.8820  3.2858   1
  -1  -9   4 16.9112  3.7642   5
  -1  -9   4 14.6632  3.3765   4
  -1  -9   4 11.0752  3.3454   1
   0   9  -4 10.8918  3.6800   1
   0  -9   4 8.30569 3.32338   5
   0  -9   4 4.95591 2.11429   2
   0  -9   4 10.6984  1.7274   3
   0  -9   4 7.48760 2.61832   4
   0  -9   4 7.16461 3.08028   1
  -1   9  -4 42.3635  5.4262   1
   1  -9   4 34.4901  2.3867   3
   1  -9   4 39.3613  3.7365   2
   1  -9   4 32.7467  5.5060   1
   1  -9   4 38.1855  5.5093   4
   1  -9   4 41.2302  2.6121   3
   1  -9   4 46.4992  5.1358   5
  -2   9  -4 25.6542  4.2294   1
   2  -9   4 21.2940  2.5090   3
   2  -9   4 19.6016  3.8110   4
   2  -9   4 32.6765  4.8945   5
   2  -9   4 16.7325  3.2458   2
   2  -9   4 32.6177  4.8732   1
  -3   9  -4 1257.07   81.63   1
   3  -9   4 1162.33   83.54   2
   3  -9   4 1142.04   97.17   4
   3  -9   4 1270.13  119.93   5
   3  -9   4 1184.48   77.98   1
   3  -9   4 1082.00   65.69   3
  -4   9  -4 -3.9929  3.4704   1
   4  -9   4 -3.4718  2.2725   3
   4  -9   4 -0.4717  3.5904   1
   4  -9   4 -0.7705  2.9437   4
   4  -9   4 0.69058 3.84684   5
   4  -9   4 4.29208 3.73758   2
   5  -9   4 60.5648  5.9095   3
   5  -9   4 65.0611  7.8176   1
   5  -9   4 41.1477  5.7523   2
   5  -9   4 53.5771  8.3591   5
   6  -9   4 18.2001  4.6116   1
   6  -9   4 23.3060  6.6656   5
   6  -9   4 29.8481  4.7758   3
   7  -9   4 1.53703 3.96804   1
   7  -9   4 -3.9521  4.1809   2
   7  -9   4 -7.1259  4.9555   5
   8  -9   4 33.2201  6.8417   1
   8  -9   4 44.1762  9.3011   5
   8  -9   4 54.7796  9.3100   2
   9  -9   4 0.99865 5.86337   2
   9  -9   4 1.69043 8.56830   5
  10   8  -4 6.69713 7.43658   3
 -10  -8   4 -7.6761  9.8859   4
   9   8  -4 -1.5390  4.6170   1
   9   8  -4 4.45788 5.85236   3
  -9  -8   4 5.83208 8.36129   4
   8   8  -4 63.7150  7.7887   3
   8   8  -4 57.2687  7.3275   1
  -8  -8   4 57.9464 10.9903   4
   7   8  -4 112.776  10.234   1
   7   8  -4 113.345  12.222   3
  -7  -8   4 118.638  12.374   4
   6   8  -4 225.724  20.786   3
   6   8  -4 235.441  16.251   1
  -6  -8   4 220.765  20.655   4
   5   8  -4 47.5762  5.9578   1
   5   8  -4 54.2934  6.1349   3
  -5  -8   4 52.1514  7.6886   4
  -5  -8   4 47.4846  5.9847   1
   4   8  -4 144.255  10.735   1
   4   8  -4 152.178  11.469   3
  -4  -8   4 185.415  11.352   1
  -4  -8   4 148.944  12.718   4
   3   8  -4 2.58825 2.58639   1
  -3  -8   4 3.00124 2.64613   1
  -3  -8   4 6.62247 3.64698   4
   2   8  -4 890.416  35.364   1
  -2  -8   4 852.791 110.736   5
  -2  -8   4 897.091  84.736   4
  -2  -8   4 881.366  56.437   1
  -2  -8   4 721.940  75.365   3
   1   8  -4 -1.0824  2.7113   1
  -1  -8   4 0.63256 1.96799   5
  -1  -8   4 1.97758 1.33798   3
  -1  -8   4 -0.4824  2.3248   4
  -1  -8   4 -4.8225  2.3825   1
   0   8  -4 474.203  27.081   1
   0  -8   4 481.782  37.529   2
   0  -8   4 493.918  34.892   4
   0  -8   4 533.716  46.771   5
   0  -8   4 462.786  23.569   1
   0  -8   4 490.791  22.918   3
  -1   8  -4 6.23929 2.90020   1
  -1   8  -4 -0.6181  1.8987   4
   1  -8   4 5.00679 2.96127   1
   1  -8   4 6.85677 2.83960   5
   1  -8   4 3.51504 1.04920   3
   1  -8   4 0.75279 2.10016   4
   1  -8   4 2.76259 0.95405   3
   1  -8   4 2.07786 1.86206   2
  -2   8  -4 1370.23   71.11   1
   2  -8   4 1391.21  119.76   5
   2  -8   4 1209.94   85.11   2
   2  -8   4 1284.39   85.94   4
   2  -8   4 1184.66   65.47   3
   2  -8   4 1312.40   99.73   1
  -3   8  -4 108.667   7.807   1
   3  -8   4 97.8987  8.7378   4
   3  -8   4 93.3516  9.3443   5
   3  -8   4 100.431   5.893   2
   3  -8   4 109.445   8.068   1
   3  -8   4 95.9350  5.8444   3
  -4   8  -4 144.143  11.952   1
   4  -8   4 155.812  12.828   2
   4  -8   4 153.699  15.520   1
   4  -8   4 147.227  17.992   5
   4  -8   4 156.842  10.809   3
  -5   8  -4 25.1698  7.6397   1
   5  -8   4 37.1573  4.6583   1
   5  -8   4 35.2551  5.0747   3
   5  -8   4 30.4890  5.4312   5
   5  -8   4 31.9672  4.8475   2
   6  -8   4 7.76811 5.22176   5
   6  -8   4 13.6612  3.9478   1
   6  -8   4 8.07158 4.63947   2
   7  -8   4 8.41022 5.43496   5
   7  -8   4 -1.3695  4.5176   3
   7  -8   4 6.94866 3.71397   1
   7  -8   4 0.97876 4.97302   2
   8  -8   4 8.81679 4.48864   1
   8  -8   4 7.26087 4.92339   2
   8  -8   4 -5.3987  6.3689   5
   8  -8   4 12.4136  4.9716   3
  -9   8  -4 -2.4868  6.3936   7
   9  -8   4 -7.4913  7.1920   2
   9  -8   4 11.2311  7.0162   3
   9  -8   4 4.16486 7.09350   5
 -10   8  -4 34.4819  8.9005   7
  10  -8   4 36.3463  8.0071   2
  10  -8   4 20.3260  6.6315   5
  10   7  -4 66.7898 11.4460   3
 -10  -7   4 87.7853 14.5055   4
   9   7  -4 3.40649 3.97061   1
   9   7  -4 1.08213 5.63505   3
  -9  -7   4 11.2505  6.5954   4
   8   7  -4 152.608  10.997   3
   8   7  -4 127.007  10.603   1
  -8  -7   4 135.068  17.804   4
   7   7  -4 95.4674  8.8812   3
   7   7  -4 107.263   7.429   1
  -7  -7   4 119.082  12.160   4
   6   7  -4 0.33186 3.30610   3
   6   7  -4 1.57235 3.29812   1
  -6  -7   4 3.63307 4.55028   4
  -6  -7   4 -1.4968  3.7941   1
   5   7  -4 44.3421  5.6983   3
   5   7  -4 43.1920  4.9287   1
  -5  -7   4 53.9008  6.6275   1
  -5  -7   4 40.0534  5.6731   4
   4   7  -4 50.8673  5.6817   1
  -4  -7   4 50.1537  5.9165   4
  -4  -7   4 50.3345  4.9087   1
   3   7  -4 33.3019  4.2548   3
  -3  -7   4 29.4038  4.9626   1
  -3  -7   4 26.8046  4.2643   4
   2   7  -4 83.6981  6.1726   1
  -2  -7   4 69.5132  5.7870   3
  -2  -7   4 80.2334  8.0826   4
  -2  -7   4 72.1985  5.8202   1
  -2  -7   4 75.4409  9.2722   5
   1   7  -4 232.898  12.268   1
  -1  -7   4 274.752  15.958   1
  -1  -7   4 210.700  14.548   5
  -1  -7   4 202.782  15.344   4
  -1  -7   4 229.861  12.341   3
   0   7  -4 -2.9205  1.5564   4
   0   7  -4 1.05401 2.65280   1
   0  -7   4 0.01883 1.03176   3
   0  -7   4 3.63752 2.79069   5
   0  -7   4 1.21083 2.08139   4
   0  -7   4 0.41408 3.06402   1
  -1   7  -4 3407.08  151.97   1
   1  -7   4 3142.91  124.23   3
   1  -7   4 3482.06  176.79   1
   1  -7   4 3724.22  314.26   2
   1  -7   4 3504.96  233.04   5
  -2   7  -4 37.6556  4.2171   1
  -2   7  -4 21.7034  2.5941   4
   2  -7   4 27.7093  3.5439   4
   2  -7   4 22.9430  3.7182   1
   2  -7   4 38.0009  6.2539   5
   2  -7   4 31.3739  4.0456   2
   2  -7   4 27.2103  2.3733   3
  -3   7  -4 363.860  38.211   4
  -3   7  -4 448.771  22.959   1
   3  -7   4 457.399  35.419   2
   3  -7   4 420.323  40.359   5
   3  -7   4 403.347  35.890   4
   3  -7   4 412.188  23.887   1
   3  -7   4 382.297  18.908   3
  -4   7  -4 14.2427  3.1605   1
   4  -7   4 12.4068  3.4771   1
   4  -7   4 13.0782  2.5712   3
   4  -7   4 11.1888  3.5299   5
   4  -7   4 10.9545  3.2761   2
  -5   7  -4 207.106  20.198   1
   5  -7   4 231.861  16.673   5
   5  -7   4 208.518  22.194   1
   5  -7   4 215.263  19.909   2
   5  -7   4 196.716  10.746   3
   6  -7   4 34.4641  5.5704   2
   6  -7   4 28.5814  4.2627   1
   6  -7   4 26.5794  5.3400   5
   7  -7   4 108.620  10.986   1
   7  -7   4 111.362  13.438   3
   7  -7   4 102.568  11.199   5
   7  -7   4 92.2279 14.9849   2
   8  -7   4 46.4869  7.4974   5
   8  -7   4 32.1564  6.4992   2
   8  -7   4 38.8073  6.0266   3
   8  -7   4 31.8218  4.4748   1
  -9   7  -4 46.3079  8.8929   7
   9  -7   4 29.6665  8.9577   2
   9  -7   4 43.9597  7.6042   3
   9  -7   4 45.1008  7.9106   5
 -10   7  -4 191.164  22.467   7
  10  -7   4 161.672  26.592   3
  10  -7   4 165.289  19.901   2
  10  -7   4 170.245  17.237   5
  10   6  -4 85.7204 12.0844   3
 -10  -6   4 90.0206 13.1884   4
   9   6  -4 0.00000 3.94456   1
   9   6  -4 5.03675 5.67383   3
  -9  -6   4 0.34026 6.40411   4
   8   6  -4 163.945  13.153   1
   8   6  -4 151.912  12.827   3
  -8  -6   4 198.580  15.318   4
   7   6  -4 94.7689  7.1684   1
   7   6  -4 105.834  10.274   3
  -7  -6   4 100.896  11.183   4
   6   6  -4 167.506   8.924   1
   6   6  -4 190.198  14.929   3
  -6  -6   4 177.346  14.173   1
  -6  -6   4 202.389  19.687   4
   5   6  -4 71.6035  5.1338   1
   5   6  -4 73.0299  6.8524   3
  -5  -6   4 71.8216  8.0649   4
  -5  -6   4 73.3707  7.3029   1
   4   6  -4 187.548   8.536   1
   4   6  -4 199.438  15.244   3
  -4  -6   4 179.258  12.785   4
  -4  -6   4 172.775  10.227   1
   3   6  -4 10.9815  2.4546   3
   3   6  -4 11.4885  3.1338   1
  -3  -6   4 8.00182 2.87003   1
  -3  -6   4 8.93710 2.83716   4
   2   6  -4 116.074   8.686   3
   2   6  -4 106.886   5.766   1
  -2  -6   4 96.5880  6.8145   3
  -2  -6   4 109.259  11.489   4
  -2  -6   4 102.853   7.158   1
   1   6  -4 5.46543 2.78151   1
  -1  -6   4 6.29020 1.55368   3
  -1  -6   4 5.20011 2.70680   1
  -1  -6   4 4.93371 1.88749   4
   0   6  -4 835.720  36.095   1
   0   6  -4 805.735  63.587   4
   0  -6   4 868.697  82.707   4
   0  -6   4 851.173  41.744   1
   0  -6   4 806.811  30.072   3
   0  -6   4 895.996  76.391   5
  -1   6  -4 19.3923  2.1517   4
  -1   6  -4 17.0492  3.2361   1
   1  -6   4 24.7181  3.4598   1
   1  -6   4 16.9788  2.4079   4
   1  -6   4 17.7471  1.1232   3
   1  -6   4 21.1913  2.9801   2
   1  -6   4 23.9492  2.7870   5
  -2   6  -4 3457.88  142.85   1
   2  -6   4 3545.18  306.45   2
   2  -6   4 2989.08  126.76   1
   2  -6   4 3391.30  294.40   4
   2  -6   4 3572.20  314.81   5
   2  -6   4 3060.44  115.45   3
  -3   6  -4 7.92122 2.40847   1
  -3   6  -4 4.25161 1.31970   4
   3  -6   4 2.80425 1.95379   1
   3  -6   4 -1.4154  2.2405   1
   3  -6   4 1.83311 2.13550   2
   3  -6   4 2.95297 1.49002   3
   3  -6   4 4.52342 2.64094   5
   3  -6   4 3.06727 1.86769   4
  -4   6  -4 162.943   9.812   1
  -4   6  -4 124.517  11.066   4
   4  -6   4 143.973  12.235   2
   4  -6   4 134.132  11.386   5
   4  -6   4 131.690  14.724   1
   4  -6   4 143.191  10.709   1
   4  -6   4 130.333   6.426   3
  -5   6  -4 57.4588  7.0046   1
   5  -6   4 65.5875  7.8100   3
   5  -6   4 70.3619  5.5321   2
   5  -6   4 57.3684  7.7176   5
   5  -6   4 65.5294  9.1610   1
   5  -6   4 65.4074  6.4749   1
   6  -6   4 24.6673  4.2872   3
   6  -6   4 19.3712  4.5809   2
   6  -6   4 22.2249  3.3606   1
   6  -6   4 39.9102  6.0184   5
   7  -6   4 16.9786  6.0354   2
   7  -6   4 18.4081  5.1333   3
   7  -6   4 7.66732 2.92817   1
   7  -6   4 6.33093 4.55192   5
   8  -6   4 7.89394 2.83482   1
   8  -6   4 -0.0491  6.2347   2
   8  -6   4 -6.5777  4.4121   5
   8  -6   4 2.40568 3.58049   3
  -9   6  -4 28.4973  7.7151   7
   9  -6   4 20.8962  5.6828   2
   9  -6   4 25.1566  6.8553   3
 -10   6  -4 146.771  22.704   7
  10  -6   4 134.664  16.130   2
  10  -6   4 130.609  16.662   3
  10  -6   4 153.628  14.488   5
  10   5  -4 1.43104 6.38906   3
 -10  -5   4 4.51762 8.54299   4
 -10  -5   4 -1.8440  7.5652   7
   9   5  -4 30.8433  5.4227   1
   9   5  -4 21.9260  8.1005   3
  -9  -5   4 21.0100  7.9263   7
  -9  -5   4 40.6011  9.1650   4
   8   5  -4 78.4094  7.7336   3
   8   5  -4 85.1134  7.2881   1
  -8  -5   4 88.9039 10.0465   4
  -8  -5   4 66.7776 11.0816   7
   7   5  -4 321.704  15.576   1
   7   5  -4 303.291  19.357   3
  -7  -5   4 332.362  26.773   4
   6   5  -4 6.16071 2.69425   3
[truncated: 1,338,837 more chars]
