# Supplementary material for: Synthesis and Thermal Studies of Two Phosphonium Tetrahydroxidohexaoxidopentaborate(1-) Salts: Single-Crystal XRD Characterization of [iPrPPh3][B5O6(OH)4]·3.5H2O and [MePPh3][B5O6(OH)4]·B(OH)3·0.5H2O
Source: Molecules. 2023 Sep 29;28(19):6867. doi: 10.3390/molecules28196867 (PMC10574587; doi:10.3390/molecules28196867)
Supplement: Supplementary file 1 [file molecules-28-06867-s001.zip › MAB2.cif]

data_MAB2

#2009src0115

_audit_creation_date               2023-08-29
_audit_creation_method
;
Olex2 1.5-alpha
(compiled 2023.08.24 svn.re1ec1418 for OlexSys, GUI svn.r6817)
;
_shelx_SHELXL_version_number       '2018/3'
loop_
  _audit_author_name
  _audit_author_email
  _audit_author_address
 'Beckett, M.A.' ''
;
Bangor University
School of Chemistry
Bangor
LL57 2UW
UK
;
 'Horton, P.N.' pnh@soton.ac.uk
;
University of Southampton
Chemistry
Southampton
SO17 1BJ
UK
;

_audit_contact_author_address      ?
_audit_contact_author_email        ?
_audit_contact_author_name         ''
_audit_contact_author_phone        ?
_publ_contact_author_id_orcid      ?
_publ_section_references
;
Dolomanov, O.V., Bourhis, L.J., Gildea, R.J, Howard, J.A.K. & Puschmann, H.
 (2009), J. Appl. Cryst. 42, 339-341.

Sheldrick, G.M. (2015). Acta Cryst. C71, 3-8.
;
_chemical_name_common              ?
_chemical_name_systematic
;
 ?
;
_chemical_formula_moiety          
 '2(B5 H4 O10), 2(C19 H18 P), 2(B H3 O3), H2 O'
_chemical_formula_sum              'C38 H52 B12 O27 P2'
_chemical_formula_weight           1132.45
_chemical_melting_point            ?
loop_
  _atom_type_symbol
  _atom_type_description
  _atom_type_scat_dispersion_real
  _atom_type_scat_dispersion_imag
  _atom_type_scat_source
 'C' 'C' 0.0033 0.0016 'International Tables Vol C Tables 4.2.6.8 and 6.1.1.4'
 'H' 'H' 0.0000 0.0000 'International Tables Vol C Tables 4.2.6.8 and 6.1.1.4'
 'B' 'B' 0.0013 0.0007 'International Tables Vol C Tables 4.2.6.8 and 6.1.1.4'
 'O' 'O' 0.0106 0.0060 'International Tables Vol C Tables 4.2.6.8 and 6.1.1.4'
 'P' 'P' 0.1023 0.0942 'International Tables Vol C Tables 4.2.6.8 and 6.1.1.4'

_shelx_space_group_comment
;
The symmetry employed for this shelxl refinement is uniquely defined
by the following loop, which should always be used as a source of
symmetry information in preference to the above space-group names.
They are only intended as comments.
;
_space_group_crystal_system        'triclinic'
_space_group_IT_number             2
_space_group_name_H-M_alt          'P -1'
_space_group_name_Hall             '-P 1'
loop_
  _space_group_symop_operation_xyz
 'x, y, z'
 '-x, -y, -z'

_cell_length_a                     10.1076(10)
_cell_length_b                     13.0403(10)
_cell_length_c                     20.6260(15)
_cell_angle_alpha                  84.364(5)
_cell_angle_beta                   82.811(4)
_cell_angle_gamma                  76.492(4)
_cell_volume                       2615.9(4)
_cell_formula_units_Z              2
_cell_measurement_reflns_used      1919
_cell_measurement_temperature      120(2)
_cell_measurement_theta_max        27.485
_cell_measurement_theta_min        2.910
_shelx_estimated_absorpt_T_max     0.988
_shelx_estimated_absorpt_T_min     0.966
_exptl_absorpt_coefficient_mu      0.172
_exptl_absorpt_correction_T_max    0.9881
_exptl_absorpt_correction_T_min    0.9665
_exptl_absorpt_correction_type     multi-scan
_exptl_absorpt_process_details     'SADABS 2007/2 (Sheldrick, G.M., 2007)'
_exptl_absorpt_special_details     ?
_exptl_crystal_colour              colourless
_exptl_crystal_colour_primary      colourless
_exptl_crystal_density_diffrn      1.438
_exptl_crystal_density_meas        x
_exptl_crystal_density_method      'not measured'
_exptl_crystal_description         'Cut Block'
_exptl_crystal_F_000               1172
_exptl_crystal_size_max            0.2
_exptl_crystal_size_mid            0.13
_exptl_crystal_size_min            0.07
_exptl_special_details
;
SADABS was used to perform the Absorption correction
Parameter refinement on 30032 reflections reduced R(int) from 0.1230 to 0.0701
Ratio of minimum to maximum apparent transmission: 0.837756
The given Tmin and Tmax were generated using the SHELX SIZE command
;
_exptl_transmission_factor_max     ?
_exptl_transmission_factor_min     ?
_diffrn_reflns_av_R_equivalents    0.0649
_diffrn_reflns_av_unetI/netI       0.0669
_diffrn_reflns_Laue_measured_fraction_full  0.988
_diffrn_reflns_Laue_measured_fraction_max  0.963
_diffrn_reflns_limit_h_max         13
_diffrn_reflns_limit_h_min         -13
_diffrn_reflns_limit_k_max         16
_diffrn_reflns_limit_k_min         -17
_diffrn_reflns_limit_l_max         26
_diffrn_reflns_limit_l_min         -26
_diffrn_reflns_number              35616
_diffrn_reflns_point_group_measured_fraction_full  0.988
_diffrn_reflns_point_group_measured_fraction_max  0.963
_diffrn_reflns_theta_full          25.242
_diffrn_reflns_theta_max           27.938
_diffrn_reflns_theta_min           2.994
_diffrn_ambient_temperature        120(2)
_diffrn_detector_area_resol_mean   '4096x4096pixels / 62x62mm'
_diffrn_measured_fraction_theta_full  0.988
_diffrn_measured_fraction_theta_max  0.963
_diffrn_measurement_device_type   
 'Bruker-Nonius APEX II CCD camera on \k-goniostat'
_diffrn_measurement_method         '\f & \w scans'
_diffrn_radiation_monochromator    '10cm confocal mirrors'
_diffrn_radiation_type             MoK\a
_diffrn_radiation_wavelength       0.71073
_diffrn_source                     'Bruker-Nonius FR591 rotating anode'
_diffrn_source_current             0.0
_diffrn_source_power               0.0
_diffrn_source_voltage             0.0
_diffrn_standards_number           0
_reflns_Friedel_coverage           0.000
_reflns_Friedel_fraction_full      .
_reflns_Friedel_fraction_max       .
_reflns_number_gt                  9025
_reflns_number_total               12083
_reflns_special_details
;
 Reflections were merged by SHELXL according to the crystal
 class for the calculation of statistics and refinement.
 
 _reflns_Friedel_fraction is defined as the number of unique
 Friedel pairs measured divided by the number that would be
 possible theoretically, ignoring centric projections and
 systematic absences.
;
_reflns_threshold_expression       'I > 2\s(I)'
_computing_cell_refinement        
 'DENZO (Otwinowski & Minor, 1997) & COLLECT (Hooft, R.W.W., 1998)'
_computing_data_collection         'COLLECT (Hooft, R.W.W., 1998)'
_computing_data_reduction         
 'DENZO (Otwinowski & Minor, 1997) & COLLECT (Hooft, R.W.W., 1998)'
_computing_molecular_graphics      'Olex2 1.5-alpha (Dolomanov et al., 2009)'
_computing_publication_material    'Olex2 1.5-alpha (Dolomanov et al., 2009)'
_computing_structure_refinement    'SHELXL 2018/3 (Sheldrick, 2015)'
_computing_structure_solution      'SHELXS-97 (Sheldrick, 1997a)'
_refine_diff_density_max           1.103
_refine_diff_density_min           -1.031
_refine_diff_density_rms           0.085
_refine_ls_extinction_coef         .
_refine_ls_extinction_method       none
_refine_ls_goodness_of_fit_ref     1.040
_refine_ls_hydrogen_treatment      constr
_refine_ls_matrix_type             full
_refine_ls_number_parameters       735
_refine_ls_number_reflns           12083
_refine_ls_number_restraints       1
_refine_ls_R_factor_all            0.1044
_refine_ls_R_factor_gt             0.0742
_refine_ls_restrained_S_all        1.040
_refine_ls_shift/su_max            0.000
_refine_ls_shift/su_mean           0.000
_refine_ls_structure_factor_coef   Fsqd
_refine_ls_weighting_details      
 'w=1/[\s^2^(Fo^2^)+(0.0287P)^2^+6.8572P] where P=(Fo^2^+2Fc^2^)/3'
_refine_ls_weighting_scheme        calc
_refine_ls_wR_factor_gt            0.1485
_refine_ls_wR_factor_ref           0.1676
_refine_special_details           
 'There was a disordered water molecule over 4 sites (and symmetry related) for which some costraints were applied.'
_olex2_refinement_description
;
1. Fixed Uiso
 At 1.2 times of:
  All C(H) groups
 At 1.5 times of:
  All C(H,H,H) groups, All O(H) groups, All O(H,H) groups
2. Uiso/Uaniso restraints and constraints
Uanis(O42) = Uanis(O41) = Uanis(O43) = Uanis(O44)
3. Others
 1*[Sof(O41)+Sof(H41A)+Sof(H41B)]+1*[Sof(O42)+Sof(H42A)+Sof(H42B)]+1*[Sof(O43)+
 Sof(H43A)+Sof(H43B)]+1*[Sof(O44)+Sof(H44A)+Sof(H44B)]=1 with esd of 0.000001
 Sof(O41)=Sof(H41A)=Sof(H41B)=FVAR(1)
 Sof(O42)=Sof(H42A)=Sof(H42B)=FVAR(2)
 Sof(O43)=Sof(H43A)=Sof(H43B)=FVAR(3)
 Sof(O44)=Sof(H44A)=Sof(H44B)=FVAR(4)
4.a Free rotating group:
 O42(H42A,H42B,O41,H41A,H41B,O43,H43A,H43B,O44,H44A,H44B)
4.b Aromatic/amide H refined with riding coordinates:
 C3(H3), C4(H4), C5(H5), C6(H6), C7(H7), C9(H9), C10(H10), C11(H11), C12(H12),
 C13(H13), C15(H15), C16(H16), C17(H17), C18(H18), C19(H19), C23(H23), C24(H24),
  C25(H25), C26(H26), C27(H27), C29(H29), C30(H30), C31(H31), C32(H32),
 C33(H33), C35(H35), C36(H36), C37(H37), C38(H38), C39(H39)
4.c Idealised Me refined as rotating group:
 C1(H1A,H1B,H1C), C21(H21A,H21B,H21C)
4.d Idealised tetrahedral OH refined as rotating group:
 O7(H7A), O8(H8), O9(H9A), O10(H10A), O17(H17A), O18(H18A), O19(H19A),
 O20(H20), O21(H21), O22(H22), O23(H23A), O31(H31A), O32(H32A), O33(H33A)
;
_atom_sites_solution_hydrogens     mixed
_atom_sites_solution_primary       ?
_atom_sites_solution_secondary     ?
loop_
  _atom_site_label
  _atom_site_type_symbol
  _atom_site_fract_x
  _atom_site_fract_y
  _atom_site_fract_z
  _atom_site_U_iso_or_equiv
  _atom_site_adp_type
  _atom_site_occupancy
  _atom_site_site_symmetry_order
  _atom_site_calc_flag
  _atom_site_refinement_flags_posn
  _atom_site_refinement_flags_adp
  _atom_site_refinement_flags_occupancy
  _atom_site_disorder_assembly
  _atom_site_disorder_group
 B1 B 0.0724(3) 0.9085(2) 0.13536(16) 0.0181(6) Uani 1 1 d . . . . .
 B2 B 0.0496(3) 1.0658(3) 0.19712(15) 0.0188(6) Uani 1 1 d . . . . .
 B3 B 0.2684(3) 0.9788(3) 0.15278(15) 0.0187(6) Uani 1 1 d . . . . .
 B4 B -0.0437(4) 0.7598(3) 0.14876(16) 0.0206(7) Uani 1 1 d . . . . .
 B5 B -0.0654(4) 0.8746(3) 0.05151(17) 0.0240(7) Uani 1 1 d . . . . .
 O1 O -0.0071(2) 0.99658(15) 0.17341(10) 0.0198(4) Uani 1 1 d . . . . .
 O2 O 0.1879(2) 1.05872(16) 0.19013(10) 0.0213(4) Uani 1 1 d . . . . .
 O3 O 0.2159(2) 0.90672(16) 0.12962(10) 0.0205(4) Uani 1 1 d . . . . .
 O4 O 0.0449(2) 0.81000(15) 0.16888(10) 0.0201(4) Uani 1 1 d . . . . .
 O5 O -0.1000(2) 0.79034(18) 0.08998(10) 0.0284(5) Uani 1 1 d . . . . .
 O6 O 0.0255(2) 0.92494(16) 0.06964(9) 0.0209(4) Uani 1 1 d . . . . .
 O7 O -0.0280(2) 1.14733(17) 0.23089(11) 0.0243(5) Uani 1 1 d . . . . .
 H7A H -0.111279 1.148825 0.229823 0.036 Uiso 1 1 calc R U . . .
 O8 O 0.4030(2) 0.97558(18) 0.14131(11) 0.0266(5) Uani 1 1 d . . . . .
 H8 H 0.421007 1.024846 0.159489 0.040 Uiso 1 1 calc R U . . .
 O9 O -0.0835(2) 0.67682(17) 0.18436(11) 0.0277(5) Uani 1 1 d . . . . .
 H9A H -0.051968 0.668075 0.220791 0.042 Uiso 1 1 calc R U . . .
 O10 O -0.1242(3) 0.90432(19) -0.00487(11) 0.0322(5) Uani 1 1 d . . . . .
 H10A H -0.099522 0.958416 -0.022910 0.048 Uiso 1 1 calc R U . . .
 B11 B 0.9639(3) 0.5489(3) 0.35042(16) 0.0185(6) Uani 1 1 d . . . . .
 B12 B 1.0908(4) 0.6910(3) 0.33019(16) 0.0217(7) Uani 1 1 d . . . . .
 B13 B 1.0940(3) 0.5921(3) 0.43390(16) 0.0202(7) Uani 1 1 d . . . . .
 B14 B 0.9933(3) 0.3771(2) 0.30230(15) 0.0175(6) Uani 1 1 d . . . . .
 B15 B 0.7713(4) 0.4750(3) 0.33193(17) 0.0226(7) Uani 1 1 d . . . . .
 O11 O 1.0005(2) 0.64051(15) 0.31193(10) 0.0201(4) Uani 1 1 d . . . . .
 O12 O 1.1450(2) 0.66371(17) 0.38999(10) 0.0258(5) Uani 1 1 d . . . . .
 O13 O 0.9963(2) 0.54596(15) 0.41874(9) 0.0189(4) Uani 1 1 d . . . . .
 O14 O 1.0474(2) 0.45263(15) 0.32165(10) 0.0186(4) Uani 1 1 d . . . . .
 O15 O 0.8558(2) 0.38673(16) 0.30515(11) 0.0231(4) Uani 1 1 d . . . . .
 O16 O 0.8209(2) 0.55242(15) 0.35095(10) 0.0194(4) Uani 1 1 d . . . . .
 O17 O 1.1338(3) 0.77046(18) 0.29296(11) 0.0308(5) Uani 1 1 d . . . . .
 H17A H 1.101591 0.778389 0.256719 0.046 Uiso 1 1 calc R U . . .
 O18 O 1.1464(2) 0.57268(17) 0.49271(10) 0.0244(5) Uani 1 1 d . . . . .
 H18A H 1.103896 0.533393 0.517551 0.037 Uiso 1 1 calc R U . . .
 O19 O 1.0787(2) 0.28831(16) 0.28015(11) 0.0231(4) Uani 1 1 d . . . . .
 H19A H 1.032956 0.250416 0.266373 0.035 Uiso 1 1 calc R U . . .
 O20 O 0.6372(2) 0.47539(19) 0.33723(14) 0.0388(6) Uani 1 1 d . . . . .
 H20 H 0.592723 0.526156 0.358734 0.058 Uiso 1 1 calc R U . . .
 C1 C 0.1443(3) 0.9935(3) 0.35972(16) 0.0310(7) Uani 1 1 d . . . . .
 H1A H 0.160721 1.033529 0.317891 0.047 Uiso 1 1 calc R U . . .
 H1B H 0.056420 1.027611 0.382533 0.047 Uiso 1 1 calc R U . . .
 H1C H 0.142276 0.921134 0.351584 0.047 Uiso 1 1 calc R U . . .
 C2 C 0.2938(3) 1.1214(2) 0.41881(14) 0.0213(6) Uani 1 1 d . . . . .
 C3 C 0.1791(3) 1.1967(2) 0.43836(16) 0.0278(7) Uani 1 1 d . . . . .
 H3 H 0.091279 1.180762 0.442629 0.033 Uiso 1 1 calc R U . . .
 C4 C 0.1920(4) 1.2954(3) 0.45172(16) 0.0329(8) Uani 1 1 d . . . . .
 H4 H 0.112752 1.347216 0.465041 0.039 Uiso 1 1 calc R U . . .
 C5 C 0.3181(4) 1.3189(3) 0.44589(16) 0.0305(7) Uani 1 1 d . . . . .
 H5 H 0.326355 1.386504 0.456105 0.037 Uiso 1 1 calc R U . . .
 C6 C 0.4316(3) 1.2459(3) 0.42553(15) 0.0282(7) Uani 1 1 d . . . . .
 H6 H 0.518911 1.262959 0.420704 0.034 Uiso 1 1 calc R U . . .
 C7 C 0.4201(3) 1.1462(3) 0.41174(15) 0.0258(7) Uani 1 1 d . . . . .
 H7 H 0.499500 1.095194 0.397435 0.031 Uiso 1 1 calc R U . . .
 C8 C 0.2416(3) 0.9300(2) 0.48878(14) 0.0216(6) Uani 1 1 d . . . . .
 C9 C 0.2448(3) 0.9808(2) 0.54483(15) 0.0224(6) Uani 1 1 d . . . . .
 H9 H 0.261847 1.049850 0.540975 0.027 Uiso 1 1 calc R U . . .
 C10 C 0.2229(3) 0.9302(2) 0.60604(15) 0.0248(6) Uani 1 1 d . . . . .
 H10 H 0.223935 0.964788 0.644373 0.030 Uiso 1 1 calc R U . . .
 C11 C 0.1996(3) 0.8290(3) 0.61129(15) 0.0249(6) Uani 1 1 d . . . . .
 H11 H 0.186175 0.793911 0.653367 0.030 Uiso 1 1 calc R U . . .
 C12 C 0.1956(3) 0.7787(3) 0.55587(16) 0.0264(7) Uani 1 1 d . . . . .
 H12 H 0.178854 0.709492 0.560074 0.032 Uiso 1 1 calc R U . . .
 C13 C 0.2159(3) 0.8287(2) 0.49420(15) 0.0258(6) Uani 1 1 d . . . . .
 H13 H 0.212409 0.794534 0.456062 0.031 Uiso 1 1 calc R U . . .
 C14 C 0.4329(3) 0.9167(2) 0.37198(15) 0.0232(6) Uani 1 1 d . . . . .
 C15 C 0.4619(4) 0.9291(3) 0.30459(16) 0.0329(8) Uani 1 1 d . . . . .
 H15 H 0.397818 0.975142 0.278924 0.039 Uiso 1 1 calc R U . . .
 C16 C 0.5833(4) 0.8745(3) 0.27530(17) 0.0378(9) Uani 1 1 d . . . . .
 H16 H 0.603552 0.881498 0.229061 0.045 Uiso 1 1 calc R U . . .
 C17 C 0.6762(4) 0.8091(3) 0.31327(17) 0.0331(8) Uani 1 1 d . . . . .
 H17 H 0.761226 0.772159 0.292965 0.040 Uiso 1 1 calc R U . . .
 C18 C 0.6479(3) 0.7969(3) 0.37929(17) 0.0329(8) Uani 1 1 d . . . . .
 H18 H 0.712568 0.751146 0.404786 0.039 Uiso 1 1 calc R U . . .
 C19 C 0.5266(3) 0.8504(3) 0.40910(16) 0.0294(7) Uani 1 1 d . . . . .
 H19 H 0.506796 0.841955 0.455305 0.035 Uiso 1 1 calc R U . . .
 P1 P 0.27829(8) 0.99032(6) 0.40919(4) 0.02123(17) Uani 1 1 d . . . . .
 C21 C 0.5479(5) 0.8645(3) 0.0043(2) 0.0534(12) Uani 1 1 d . . . . .
 H21A H 0.626864 0.871724 0.025233 0.080 Uiso 1 1 calc R U . . .
 H21B H 0.463470 0.901969 0.028409 0.080 Uiso 1 1 calc R U . . .
 H21C H 0.554410 0.894880 -0.041021 0.080 Uiso 1 1 calc R U . . .
 C22 C 0.4182(4) 0.7103(3) -0.04169(18) 0.0393(9) Uani 1 1 d . . . . .
 C23 C 0.4480(4) 0.6349(3) -0.08831(18) 0.0371(8) Uani 1 1 d . . . . .
 H23 H 0.538005 0.592194 -0.094622 0.044 Uiso 1 1 calc R U . . .
 C24 C 0.3499(4) 0.6210(3) -0.1252(2) 0.0462(10) Uani 1 1 d . . . . .
 H24 H 0.372210 0.569606 -0.156788 0.055 Uiso 1 1 calc R U . . .
 C25 C 0.2200(5) 0.6820(4) -0.1160(2) 0.0631(15) Uani 1 1 d . . . . .
 H25 H 0.151242 0.673137 -0.141019 0.076 Uiso 1 1 calc R U . . .
 C26 C 0.1896(5) 0.7569(4) -0.0700(2) 0.0670(15) Uani 1 1 d . . . . .
 H26 H 0.099251 0.798981 -0.063782 0.080 Uiso 1 1 calc R U . . .
 C27 C 0.2868(4) 0.7719(4) -0.0329(2) 0.0544(12) Uani 1 1 d . . . . .
 H27 H 0.263940 0.823801 -0.001622 0.065 Uiso 1 1 calc R U . . .
 C28 C 0.5150(4) 0.6788(3) 0.08783(17) 0.0331(8) Uani 1 1 d . . . . .
 C29 C 0.3940(4) 0.6475(3) 0.10946(18) 0.0347(8) Uani 1 1 d . . . . .
 H29 H 0.329475 0.646829 0.079822 0.042 Uiso 1 1 calc R U . . .
 C30 C 0.3696(4) 0.6175(3) 0.17502(19) 0.0407(9) Uani 1 1 d . . . . .
 H30 H 0.287145 0.595901 0.190784 0.049 Uiso 1 1 calc R U . . .
 C31 C 0.4630(4) 0.6184(3) 0.2178(2) 0.0439(9) Uani 1 1 d . . . . .
 H31 H 0.443854 0.598548 0.262934 0.053 Uiso 1 1 calc R U . . .
 C32 C 0.5839(4) 0.6477(3) 0.19591(19) 0.0439(9) Uani 1 1 d . . . . .
 H32 H 0.649495 0.646030 0.225441 0.053 Uiso 1 1 calc R U . . .
 C33 C 0.6090(4) 0.6797(3) 0.13059(19) 0.0407(9) Uani 1 1 d . . . . .
 H33 H 0.690933 0.702315 0.115183 0.049 Uiso 1 1 calc R U . . .
 C34 C 0.7034(4) 0.6566(3) -0.03072(17) 0.0319(7) Uani 1 1 d . . . . .
 C35 C 0.7682(4) 0.7027(3) -0.08526(18) 0.0405(9) Uani 1 1 d . . . . .
 H35 H 0.734266 0.774504 -0.099534 0.049 Uiso 1 1 calc R U . . .
 C36 C 0.8805(4) 0.6438(4) -0.11789(19) 0.0498(11) Uani 1 1 d . . . . .
 H36 H 0.925781 0.674800 -0.155197 0.060 Uiso 1 1 calc R U . . .
 C37 C 0.9298(4) 0.5397(4) -0.09770(19) 0.0458(10) Uani 1 1 d . . . . .
 H37 H 1.007840 0.499324 -0.121588 0.055 Uiso 1 1 calc R U . . .
 C38 C 0.8674(4) 0.4934(3) -0.0434(2) 0.0427(9) Uani 1 1 d . . . . .
 H38 H 0.902703 0.421789 -0.029232 0.051 Uiso 1 1 calc R U . . .
 C39 C 0.7537(4) 0.5518(3) -0.00987(19) 0.0385(9) Uani 1 1 d . . . . .
 H39 H 0.709272 0.520580 0.027642 0.046 Uiso 1 1 calc R U . . .
 P21 P 0.54611(10) 0.72791(7) 0.00505(5) 0.0339(2) Uani 1 1 d . . . . .
 B21 B 1.3973(3) 0.3538(3) 0.28286(17) 0.0214(7) Uani 1 1 d . . . . .
 O21 O 1.3483(2) 0.27661(18) 0.25925(12) 0.0301(5) Uani 1 1 d . . . . .
 H21 H 1.262443 0.290915 0.265525 0.045 Uiso 1 1 calc R U . . .
 O22 O 1.3187(2) 0.44264(16) 0.30701(11) 0.0242(5) Uani 1 1 d . . . . .
 H22 H 1.236003 0.439929 0.309589 0.036 Uiso 1 1 calc R U . . .
 O23 O 1.5345(2) 0.33658(17) 0.28009(11) 0.0269(5) Uani 1 1 d . . . . .
 H23A H 1.555599 0.385015 0.297792 0.040 Uiso 1 1 calc R U . . .
 B31 B 1.6446(4) 0.1037(3) 0.19543(18) 0.0250(7) Uani 1 1 d . . . . .
 O31 O 1.6996(2) 0.15766(17) 0.23576(11) 0.0265(5) Uani 1 1 d . . . . .
 H31A H 1.640922 0.211466 0.247472 0.040 Uiso 1 1 calc R U . . .
 O32 O 1.5094(2) 0.12591(18) 0.18816(12) 0.0303(5) Uani 1 1 d . . . . .
 H32A H 1.467806 0.173948 0.212435 0.045 Uiso 1 1 calc R U . . .
 O33 O 1.7238(2) 0.02524(19) 0.16164(12) 0.0338(6) Uani 1 1 d . . . . .
 H33A H 1.805815 0.018811 0.168192 0.051 Uiso 1 1 calc R U . . .
 O42 O 0.5273(10) 0.4515(7) 0.5343(3) 0.0426(17) Uani 0.217(3) 1 d G . P A -2
 H42A H 0.570880 0.393247 0.553541 0.064 Uiso 0.217(3) 1 d G U P A -2
 H42B H 0.577884 0.459433 0.497619 0.064 Uiso 0.217(3) 1 d G U P A -2
 O41 O 0.4373(11) 0.5477(8) 0.5093(3) 0.0426(17) Uani 0.158(3) 1 d G . P B -1
 H41A H 0.454180 0.600820 0.526678 0.064 Uiso 0.158(3) 1 d G U P B -1
 H41B H 0.496958 0.493109 0.523270 0.064 Uiso 0.158(3) 1 d G U P B -1
 O43 O 0.4513(4) 0.6026(4) 0.4149(3) 0.0426(17) Uani 0.281(3) 1 d G . P C -3
 H43A H 0.417524 0.556979 0.397990 0.064 Uiso 0.281(3) 1 d G U P C -3
 H43B H 0.422346 0.662077 0.392608 0.064 Uiso 0.281(3) 1 d G U P C -3
 O44 O 0.4456(5) 0.6289(4) 0.3863(3) 0.0426(17) Uani 0.344(3) 1 d G . P D -4
 H44A H 0.482593 0.602165 0.421828 0.064 Uiso 0.344(3) 1 d G U P D -4
 H44B H 0.386336 0.591430 0.382870 0.064 Uiso 0.344(3) 1 d G U P D -4

loop_
  _atom_site_aniso_label
  _atom_site_aniso_U_11
  _atom_site_aniso_U_22
  _atom_site_aniso_U_33
  _atom_site_aniso_U_23
  _atom_site_aniso_U_13
  _atom_site_aniso_U_12
 B1 0.0198(16) 0.0158(15) 0.0192(15) -0.0022(12) -0.0021(12) -0.0045(12)
 B2 0.0200(16) 0.0195(15) 0.0168(15) -0.0014(12) -0.0015(12) -0.0043(12)
 B3 0.0194(16) 0.0206(15) 0.0158(14) 0.0017(12) -0.0010(12) -0.0057(12)
 B4 0.0246(17) 0.0195(16) 0.0178(15) -0.0021(13) 0.0018(12) -0.0070(13)
 B5 0.0316(19) 0.0232(17) 0.0198(16) -0.0020(14) -0.0017(14) -0.0119(14)
 O1 0.0167(10) 0.0202(10) 0.0228(10) -0.0063(8) 0.0000(8) -0.0040(8)
 O2 0.0176(10) 0.0239(10) 0.0246(10) -0.0064(9) -0.0028(8) -0.0069(8)
 O3 0.0179(10) 0.0205(10) 0.0232(10) -0.0051(8) 0.0019(8) -0.0052(8)
 O4 0.0219(10) 0.0188(10) 0.0202(10) -0.0013(8) -0.0010(8) -0.0064(8)
 O5 0.0373(13) 0.0305(12) 0.0247(11) 0.0036(9) -0.0091(9) -0.0218(10)
 O6 0.0255(11) 0.0199(10) 0.0185(10) -0.0021(8) -0.0005(8) -0.0085(8)
 O7 0.0179(10) 0.0266(11) 0.0300(11) -0.0112(9) -0.0030(9) -0.0044(9)
 O8 0.0179(11) 0.0336(12) 0.0299(12) -0.0065(10) 0.0005(9) -0.0090(9)
 O9 0.0359(13) 0.0268(11) 0.0251(11) 0.0022(9) -0.0047(10) -0.0172(10)
 O10 0.0470(15) 0.0335(13) 0.0242(11) 0.0046(10) -0.0125(10) -0.0237(11)
 B11 0.0199(16) 0.0172(15) 0.0184(15) -0.0001(12) -0.0030(12) -0.0043(12)
 B12 0.0242(17) 0.0241(17) 0.0183(15) -0.0032(13) -0.0013(13) -0.0083(13)
 B13 0.0213(16) 0.0216(16) 0.0184(15) -0.0038(13) -0.0006(12) -0.0062(13)
 B14 0.0186(15) 0.0169(15) 0.0169(14) -0.0018(12) -0.0015(12) -0.0035(12)
 B15 0.0209(17) 0.0225(16) 0.0258(17) -0.0007(14) -0.0053(13) -0.0062(13)
 O11 0.0220(11) 0.0182(10) 0.0207(10) -0.0001(8) -0.0030(8) -0.0059(8)
 O12 0.0282(12) 0.0328(12) 0.0211(10) -0.0011(9) -0.0031(9) -0.0164(10)
 O13 0.0225(10) 0.0180(10) 0.0177(9) -0.0015(8) -0.0027(8) -0.0073(8)
 O14 0.0161(10) 0.0181(10) 0.0225(10) -0.0049(8) -0.0014(8) -0.0046(8)
 O15 0.0167(10) 0.0196(10) 0.0345(12) -0.0057(9) -0.0041(9) -0.0046(8)
 O16 0.0159(10) 0.0177(10) 0.0244(10) -0.0036(8) -0.0017(8) -0.0025(8)
 O17 0.0433(14) 0.0338(12) 0.0223(11) 0.0012(10) -0.0043(10) -0.0238(11)
 O18 0.0274(12) 0.0278(12) 0.0211(10) -0.0004(9) -0.0046(9) -0.0121(9)
 O19 0.0206(11) 0.0195(10) 0.0302(11) -0.0099(9) 0.0012(9) -0.0051(8)
 O20 0.0166(11) 0.0345(14) 0.0666(18) -0.0146(13) -0.0043(11) -0.0038(10)
 C1 0.0242(16) 0.0385(19) 0.0303(17) -0.0024(15) -0.0105(13) -0.0031(14)
 C2 0.0216(15) 0.0210(14) 0.0181(13) 0.0010(11) -0.0022(11) 0.0006(11)
 C3 0.0257(16) 0.0246(16) 0.0297(17) 0.0024(13) -0.0004(13) -0.0016(13)
 C4 0.0348(19) 0.0257(16) 0.0296(17) -0.0002(14) 0.0032(14) 0.0065(14)
 C5 0.042(2) 0.0219(16) 0.0259(16) -0.0005(13) -0.0047(14) -0.0038(14)
 C6 0.0302(17) 0.0303(17) 0.0247(16) 0.0037(13) -0.0069(13) -0.0083(14)
 C7 0.0207(15) 0.0284(16) 0.0245(15) -0.0007(13) -0.0039(12) 0.0025(12)
 C8 0.0177(14) 0.0233(15) 0.0222(14) -0.0010(12) -0.0013(11) -0.0021(11)
 C9 0.0210(15) 0.0202(14) 0.0256(15) -0.0041(12) 0.0008(12) -0.0043(11)
 C10 0.0237(15) 0.0269(16) 0.0235(15) -0.0037(13) -0.0002(12) -0.0054(12)
 C11 0.0199(15) 0.0303(16) 0.0233(15) 0.0008(13) 0.0017(12) -0.0066(12)
 C12 0.0231(16) 0.0245(15) 0.0319(17) -0.0011(13) 0.0010(13) -0.0083(12)
 C13 0.0247(16) 0.0285(16) 0.0246(15) -0.0081(13) 0.0008(12) -0.0061(13)
 C14 0.0238(15) 0.0213(14) 0.0232(15) -0.0037(12) -0.0005(12) -0.0027(12)
 C15 0.0335(18) 0.0319(18) 0.0253(16) 0.0015(14) 0.0018(14) 0.0046(14)
 C16 0.041(2) 0.0359(19) 0.0273(17) -0.0023(15) 0.0072(15) 0.0039(16)
 C17 0.0304(18) 0.0277(17) 0.0354(18) -0.0077(14) 0.0061(14) 0.0024(14)
 C18 0.0272(17) 0.0333(18) 0.0329(18) -0.0040(15) -0.0049(14) 0.0056(14)
 C19 0.0264(17) 0.0361(18) 0.0227(15) -0.0040(14) -0.0033(13) 0.0000(14)
 P1 0.0188(4) 0.0236(4) 0.0197(4) -0.0018(3) -0.0021(3) -0.0015(3)
 C21 0.080(3) 0.0250(18) 0.051(2) -0.0084(18) 0.026(2) -0.019(2)
 C22 0.040(2) 0.0281(18) 0.0370(19) 0.0123(15) 0.0146(16) 0.0025(15)
 C23 0.0335(19) 0.0314(18) 0.042(2) 0.0086(16) 0.0038(16) -0.0076(15)
 C24 0.050(2) 0.045(2) 0.043(2) 0.0186(19) -0.0020(18) -0.0191(19)
 C25 0.041(2) 0.090(4) 0.051(3) 0.039(3) -0.008(2) -0.018(2)
 C26 0.039(3) 0.084(4) 0.055(3) 0.025(3) 0.010(2) 0.013(2)
 C27 0.045(2) 0.062(3) 0.038(2) 0.016(2) 0.0075(18) 0.009(2)
 C28 0.040(2) 0.0246(16) 0.0317(18) -0.0024(14) 0.0120(15) -0.0100(14)
 C29 0.0310(18) 0.0324(18) 0.0362(19) 0.0012(15) 0.0073(15) -0.0055(14)
 C30 0.034(2) 0.040(2) 0.041(2) 0.0088(17) 0.0119(16) -0.0075(16)
 C31 0.045(2) 0.044(2) 0.039(2) 0.0002(18) 0.0074(17) -0.0097(18)
 C32 0.055(3) 0.046(2) 0.037(2) -0.0048(18) -0.0009(18) -0.0247(19)
 C33 0.049(2) 0.036(2) 0.041(2) -0.0103(17) 0.0109(17) -0.0219(17)
 C34 0.0358(19) 0.0304(17) 0.0306(17) -0.0069(14) 0.0081(14) -0.0138(15)
 C35 0.038(2) 0.050(2) 0.0314(19) 0.0048(17) 0.0037(15) -0.0147(17)
 C36 0.036(2) 0.077(3) 0.0303(19) 0.009(2) 0.0081(16) -0.011(2)
 C37 0.034(2) 0.066(3) 0.034(2) -0.0115(19) 0.0040(16) -0.0068(19)
 C38 0.035(2) 0.039(2) 0.053(2) -0.0070(18) 0.0024(17) -0.0079(16)
 C39 0.040(2) 0.0331(19) 0.040(2) -0.0002(16) 0.0103(16) -0.0130(16)
 P21 0.0423(5) 0.0226(4) 0.0327(5) -0.0010(4) 0.0129(4) -0.0084(4)
 B21 0.0145(15) 0.0239(16) 0.0257(17) -0.0001(14) -0.0012(12) -0.0052(13)
 O21 0.0208(11) 0.0345(13) 0.0378(13) -0.0123(10) -0.0018(10) -0.0083(10)
 O22 0.0157(10) 0.0252(11) 0.0320(12) -0.0050(9) 0.0005(9) -0.0058(8)
 O23 0.0160(10) 0.0293(12) 0.0352(13) -0.0075(10) 0.0002(9) -0.0038(9)
 B31 0.0193(17) 0.0262(18) 0.0292(18) -0.0036(15) 0.0008(14) -0.0055(13)
 O31 0.0207(11) 0.0270(12) 0.0317(12) -0.0088(10) -0.0008(9) -0.0033(9)
 O32 0.0175(11) 0.0290(12) 0.0443(14) -0.0118(10) 0.0010(10) -0.0037(9)
 O33 0.0173(11) 0.0380(13) 0.0488(15) -0.0212(11) -0.0005(10) -0.0054(10)
 O42 0.016(2) 0.051(3) 0.063(5) -0.036(3) 0.004(3) -0.003(2)
 O41 0.016(2) 0.051(3) 0.063(5) -0.036(3) 0.004(3) -0.003(2)
 O43 0.016(2) 0.051(3) 0.063(5) -0.036(3) 0.004(3) -0.003(2)
 O44 0.016(2) 0.051(3) 0.063(5) -0.036(3) 0.004(3) -0.003(2)

_geom_special_details
;
 All esds (except the esd in the dihedral angle between two l.s. planes)
 are estimated using the full covariance matrix.  The cell esds are taken
 into account individually in the estimation of esds in distances, angles
 and torsion angles; correlations between esds in cell parameters are only
 used when they are defined by crystal symmetry.  An approximate (isotropic)
 treatment of cell esds is used for estimating esds involving l.s. planes.
;
loop_
  _geom_bond_atom_site_label_1
  _geom_bond_atom_site_label_2
  _geom_bond_distance
  _geom_bond_site_symmetry_2
  _geom_bond_publ_flag
 B1 O1 1.473(4) . ?
 B1 O3 1.435(4) . ?
 B1 O4 1.466(4) . ?
 B1 O6 1.471(4) . ?
 B2 O1 1.335(4) . ?
 B2 O2 1.369(4) . ?
 B2 O7 1.360(4) . ?
 B3 O2 1.395(4) . ?
 B3 O3 1.334(4) . ?
 B3 O8 1.342(4) . ?
 B4 O4 1.350(4) . ?
 B4 O5 1.387(4) . ?
 B4 O9 1.359(4) . ?
 B5 O5 1.378(4) . ?
 B5 O6 1.353(4) . ?
 B5 O10 1.353(4) . ?
 O7 H7A 0.8400 . ?
 O8 H8 0.8400 . ?
 O9 H9A 0.8400 . ?
 O10 H10A 0.8400 . ?
 B11 O11 1.463(4) . ?
 B11 O13 1.481(4) . ?
 B11 O14 1.472(4) . ?
 B11 O16 1.434(4) . ?
 B12 O11 1.351(4) . ?
 B12 O12 1.393(4) . ?
 B12 O17 1.350(4) . ?
 B13 O12 1.378(4) . ?
 B13 O13 1.351(4) . ?
 B13 O18 1.361(4) . ?
 B14 O14 1.346(4) . ?
 B14 O15 1.361(4) . ?
 B14 O19 1.354(4) . ?
 B15 O15 1.381(4) . ?
 B15 O16 1.337(4) . ?
 B15 O20 1.346(4) . ?
 O17 H17A 0.8400 . ?
 O18 H18A 0.8400 . ?
 O19 H19A 0.8400 . ?
 O20 H20 0.8400 . ?
 C1 H1A 0.9800 . ?
 C1 H1B 0.9800 . ?
 C1 H1C 0.9800 . ?
 C1 P1 1.785(3) . ?
 C2 C3 1.379(4) . ?
 C2 C7 1.375(4) . ?
 C2 P1 1.785(3) . ?
 C3 H3 0.9500 . ?
 C3 C4 1.380(5) . ?
 C4 H4 0.9500 . ?
 C4 C5 1.368(5) . ?
 C5 H5 0.9500 . ?
 C5 C6 1.359(5) . ?
 C6 H6 0.9500 . ?
 C6 C7 1.392(5) . ?
 C7 H7 0.9500 . ?
 C8 C9 1.395(4) . ?
 C8 C13 1.396(4) . ?
 C8 P1 1.784(3) . ?
 C9 H9 0.9500 . ?
 C9 C10 1.383(4) . ?
 C10 H10 0.9500 . ?
 C10 C11 1.386(4) . ?
 C11 H11 0.9500 . ?
 C11 C12 1.382(4) . ?
 C12 H12 0.9500 . ?
 C12 C13 1.386(4) . ?
 C13 H13 0.9500 . ?
 C14 C15 1.386(4) . ?
 C14 C19 1.378(4) . ?
 C14 P1 1.760(3) . ?
 C15 H15 0.9500 . ?
 C15 C16 1.367(5) . ?
 C16 H16 0.9500 . ?
 C16 C17 1.378(5) . ?
 C17 H17 0.9500 . ?
 C17 C18 1.357(5) . ?
 C18 H18 0.9500 . ?
 C18 C19 1.365(4) . ?
 C19 H19 0.9500 . ?
 C21 H21A 0.9800 . ?
 C21 H21B 0.9800 . ?
 C21 H21C 0.9800 . ?
 C21 P21 1.784(4) . ?
 C22 C23 1.399(5) . ?
 C22 C27 1.382(5) . ?
 C22 P21 1.774(5) . ?
 C23 H23 0.9500 . ?
 C23 C24 1.376(6) . ?
 C24 H24 0.9500 . ?
 C24 C25 1.368(6) . ?
 C25 H25 0.9500 . ?
 C25 C26 1.385(8) . ?
 C26 H26 0.9500 . ?
 C26 C27 1.377(7) . ?
 C27 H27 0.9500 . ?
 C28 C29 1.386(5) . ?
 C28 C33 1.378(5) . ?
 C28 P21 1.780(3) . ?
 C29 H29 0.9500 . ?
 C29 C30 1.379(5) . ?
 C30 H30 0.9500 . ?
 C30 C31 1.373(6) . ?
 C31 H31 0.9500 . ?
 C31 C32 1.375(5) . ?
 C32 H32 0.9500 . ?
 C32 C33 1.381(5) . ?
 C33 H33 0.9500 . ?
 C34 C35 1.387(5) . ?
 C34 C39 1.387(5) . ?
 C34 P21 1.757(4) . ?
 C35 H35 0.9500 . ?
 C35 C36 1.355(5) . ?
 C36 H36 0.9500 . ?
 C36 C37 1.374(6) . ?
 C37 H37 0.9500 . ?
 C37 C38 1.373(5) . ?
 C38 H38 0.9500 . ?
 C38 C39 1.369(5) . ?
 C39 H39 0.9500 . ?
 B21 O21 1.373(4) . ?
 B21 O22 1.344(4) . ?
 B21 O23 1.347(4) . ?
 O21 H21 0.8400 . ?
 O22 H22 0.8400 . ?
 O23 H23A 0.8400 . ?
 B31 O31 1.382(4) . ?
 B31 O32 1.354(4) . ?
 B31 O33 1.339(4) . ?
 O31 H31A 0.8400 . ?
 O32 H32A 0.8400 . ?
 O33 H33A 0.8400 . ?
 O42 H42A 0.8701 . ?
 O42 H42B 0.8698 . ?
 O41 H41A 0.8703 . ?
 O41 H41B 0.8699 . ?
 O43 H43A 0.8702 . ?
 O43 H43B 0.8700 . ?
 O44 H44A 0.8699 . ?
 O44 H44B 0.8700 . ?

loop_
  _geom_angle_atom_site_label_1
  _geom_angle_atom_site_label_2
  _geom_angle_atom_site_label_3
  _geom_angle
  _geom_angle_site_symmetry_1
  _geom_angle_site_symmetry_3
  _geom_angle_publ_flag
 O3 B1 O1 110.9(2) . . ?
 O3 B1 O4 110.7(2) . . ?
 O3 B1 O6 109.2(2) . . ?
 O4 B1 O1 107.8(2) . . ?
 O4 B1 O6 110.7(2) . . ?
 O6 B1 O1 107.5(2) . . ?
 O1 B2 O2 122.7(3) . . ?
 O1 B2 O7 121.3(3) . . ?
 O7 B2 O2 116.0(3) . . ?
 O3 B3 O2 122.1(3) . . ?
 O3 B3 O8 120.3(3) . . ?
 O8 B3 O2 117.6(3) . . ?
 O4 B4 O5 121.7(3) . . ?
 O4 B4 O9 122.6(3) . . ?
 O9 B4 O5 115.8(3) . . ?
 O6 B5 O5 120.6(3) . . ?
 O6 B5 O10 121.5(3) . . ?
 O10 B5 O5 117.9(3) . . ?
 B2 O1 B1 123.2(2) . . ?
 B2 O2 B3 116.7(2) . . ?
 B3 O3 B1 124.1(2) . . ?
 B4 O4 B1 122.3(2) . . ?
 B5 O5 B4 119.0(3) . . ?
 B5 O6 B1 123.1(2) . . ?
 B2 O7 H7A 109.5 . . ?
 B3 O8 H8 109.5 . . ?
 B4 O9 H9A 109.5 . . ?
 B5 O10 H10A 109.5 . . ?
 O11 B11 O13 110.4(2) . . ?
 O11 B11 O14 108.2(2) . . ?
 O14 B11 O13 107.7(2) . . ?
 O16 B11 O11 110.8(2) . . ?
 O16 B11 O13 109.0(2) . . ?
 O16 B11 O14 110.7(2) . . ?
 O11 B12 O12 121.1(3) . . ?
 O17 B12 O11 123.2(3) . . ?
 O17 B12 O12 115.7(3) . . ?
 O13 B13 O12 121.0(3) . . ?
 O13 B13 O18 122.9(3) . . ?
 O18 B13 O12 116.1(3) . . ?
 O14 B14 O15 122.1(3) . . ?
 O14 B14 O19 118.8(3) . . ?
 O19 B14 O15 119.1(3) . . ?
 O16 B15 O15 121.9(3) . . ?
 O16 B15 O20 123.7(3) . . ?
 O20 B15 O15 114.3(3) . . ?
 B12 O11 B11 122.3(2) . . ?
 B13 O12 B12 119.0(2) . . ?
 B13 O13 B11 121.6(2) . . ?
 B14 O14 B11 123.1(2) . . ?
 B14 O15 B15 117.8(2) . . ?
 B15 O16 B11 124.2(2) . . ?
 B12 O17 H17A 109.5 . . ?
 B13 O18 H18A 109.5 . . ?
 B14 O19 H19A 109.5 . . ?
 B15 O20 H20 109.5 . . ?
 H1A C1 H1B 109.5 . . ?
 H1A C1 H1C 109.5 . . ?
 H1B C1 H1C 109.5 . . ?
 P1 C1 H1A 109.5 . . ?
 P1 C1 H1B 109.5 . . ?
 P1 C1 H1C 109.5 . . ?
 C3 C2 P1 119.6(2) . . ?
 C7 C2 C3 119.4(3) . . ?
 C7 C2 P1 120.8(2) . . ?
 C2 C3 H3 120.0 . . ?
 C2 C3 C4 119.9(3) . . ?
 C4 C3 H3 120.0 . . ?
 C3 C4 H4 119.8 . . ?
 C5 C4 C3 120.4(3) . . ?
 C5 C4 H4 119.8 . . ?
 C4 C5 H5 119.9 . . ?
 C6 C5 C4 120.1(3) . . ?
 C6 C5 H5 119.9 . . ?
 C5 C6 H6 120.0 . . ?
 C5 C6 C7 120.0(3) . . ?
 C7 C6 H6 120.0 . . ?
 C2 C7 C6 120.0(3) . . ?
 C2 C7 H7 120.0 . . ?
 C6 C7 H7 120.0 . . ?
 C9 C8 C13 120.3(3) . . ?
 C9 C8 P1 120.8(2) . . ?
 C13 C8 P1 118.8(2) . . ?
 C8 C9 H9 120.1 . . ?
 C10 C9 C8 119.8(3) . . ?
 C10 C9 H9 120.1 . . ?
 C9 C10 H10 120.1 . . ?
 C9 C10 C11 119.8(3) . . ?
 C11 C10 H10 120.1 . . ?
 C10 C11 H11 119.7 . . ?
 C12 C11 C10 120.6(3) . . ?
 C12 C11 H11 119.7 . . ?
 C11 C12 H12 119.9 . . ?
 C11 C12 C13 120.3(3) . . ?
 C13 C12 H12 119.9 . . ?
 C8 C13 H13 120.4 . . ?
 C12 C13 C8 119.2(3) . . ?
 C12 C13 H13 120.4 . . ?
 C15 C14 P1 119.0(2) . . ?
 C19 C14 C15 120.1(3) . . ?
 C19 C14 P1 120.9(2) . . ?
 C14 C15 H15 120.2 . . ?
 C16 C15 C14 119.5(3) . . ?
 C16 C15 H15 120.2 . . ?
 C15 C16 H16 120.2 . . ?
 C15 C16 C17 119.6(3) . . ?
 C17 C16 H16 120.2 . . ?
 C16 C17 H17 119.5 . . ?
 C18 C17 C16 120.9(3) . . ?
 C18 C17 H17 119.5 . . ?
 C17 C18 H18 120.0 . . ?
 C17 C18 C19 120.1(3) . . ?
 C19 C18 H18 120.0 . . ?
 C14 C19 H19 120.1 . . ?
 C18 C19 C14 119.8(3) . . ?
 C18 C19 H19 120.1 . . ?
 C2 P1 C1 110.34(15) . . ?
 C8 P1 C1 110.33(15) . . ?
 C8 P1 C2 107.74(14) . . ?
 C14 P1 C1 109.16(16) . . ?
 C14 P1 C2 110.16(14) . . ?
 C14 P1 C8 109.09(14) . . ?
 H21A C21 H21B 109.5 . . ?
 H21A C21 H21C 109.5 . . ?
 H21B C21 H21C 109.5 . . ?
 P21 C21 H21A 109.5 . . ?
 P21 C21 H21B 109.5 . . ?
 P21 C21 H21C 109.5 . . ?
 C23 C22 P21 121.0(3) . . ?
 C27 C22 C23 118.7(4) . . ?
 C27 C22 P21 120.3(3) . . ?
 C22 C23 H23 119.2 . . ?
 C24 C23 C22 121.5(4) . . ?
 C24 C23 H23 119.2 . . ?
 C23 C24 H24 120.3 . . ?
 C25 C24 C23 119.3(5) . . ?
 C25 C24 H24 120.3 . . ?
 C24 C25 H25 120.2 . . ?
 C24 C25 C26 119.5(5) . . ?
 C26 C25 H25 120.2 . . ?
 C25 C26 H26 119.1 . . ?
 C27 C26 C25 121.8(4) . . ?
 C27 C26 H26 119.1 . . ?
 C22 C27 H27 120.5 . . ?
 C26 C27 C22 119.1(5) . . ?
 C26 C27 H27 120.5 . . ?
 C29 C28 P21 120.3(3) . . ?
 C33 C28 C29 121.0(3) . . ?
 C33 C28 P21 118.5(3) . . ?
 C28 C29 H29 120.8 . . ?
 C30 C29 C28 118.4(4) . . ?
 C30 C29 H29 120.8 . . ?
 C29 C30 H30 119.6 . . ?
 C31 C30 C29 120.8(4) . . ?
 C31 C30 H30 119.6 . . ?
 C30 C31 H31 119.7 . . ?
 C30 C31 C32 120.7(4) . . ?
 C32 C31 H31 119.7 . . ?
 C31 C32 H32 120.3 . . ?
 C31 C32 C33 119.3(4) . . ?
 C33 C32 H32 120.3 . . ?
 C28 C33 C32 119.8(4) . . ?
 C28 C33 H33 120.1 . . ?
 C32 C33 H33 120.1 . . ?
 C35 C34 C39 120.3(3) . . ?
 C35 C34 P21 118.6(3) . . ?
 C39 C34 P21 120.6(3) . . ?
 C34 C35 H35 120.5 . . ?
 C36 C35 C34 119.0(4) . . ?
 C36 C35 H35 120.5 . . ?
 C35 C36 H36 119.6 . . ?
 C35 C36 C37 120.8(4) . . ?
 C37 C36 H36 119.6 . . ?
 C36 C37 H37 119.6 . . ?
 C38 C37 C36 120.7(4) . . ?
 C38 C37 H37 119.6 . . ?
 C37 C38 H38 120.4 . . ?
 C39 C38 C37 119.2(4) . . ?
 C39 C38 H38 120.4 . . ?
 C34 C39 H39 120.0 . . ?
 C38 C39 C34 120.0(3) . . ?
 C38 C39 H39 120.0 . . ?
 C22 P21 C21 110.8(2) . . ?
 C22 P21 C28 110.34(17) . . ?
 C28 P21 C21 108.37(18) . . ?
 C34 P21 C21 110.39(19) . . ?
 C34 P21 C22 106.82(17) . . ?
 C34 P21 C28 110.10(17) . . ?
 O22 B21 O21 124.7(3) . . ?
 O22 B21 O23 119.7(3) . . ?
 O23 B21 O21 115.6(3) . . ?
 B21 O21 H21 109.5 . . ?
 B21 O22 H22 109.5 . . ?
 B21 O23 H23A 109.5 . . ?
 O32 B31 O31 122.6(3) . . ?
 O33 B31 O31 121.0(3) . . ?
 O33 B31 O32 116.4(3) . . ?
 B31 O31 H31A 109.5 . . ?
 B31 O32 H32A 109.5 . . ?
 B31 O33 H33A 109.5 . . ?
 H42A O42 H42B 104.5 . . ?
 H41A O41 H41B 104.5 . . ?
 H43A O43 H43B 104.5 . . ?
 H44A O44 H44B 104.5 . . ?

loop_
  _geom_hbond_atom_site_label_D
  _geom_hbond_atom_site_label_H
  _geom_hbond_atom_site_label_A
  _geom_hbond_distance_DH
  _geom_hbond_distance_HA
  _geom_hbond_distance_DA
  _geom_hbond_angle_DHA
  _geom_hbond_site_symmetry_A
  _geom_hbond_publ_flag
 O7 H7A O31 0.84 1.88 2.714(3) 174.2 1_365 yes
 O8 H8 O32 0.84 1.93 2.748(3) 164.7 1_465 yes
 O9 H9A O11 0.84 1.99 2.828(3) 172.3 1_455 yes
 O10 H10A O6 0.84 1.97 2.803(3) 174.1 2_575 yes
 O17 H17A O4 0.84 1.95 2.779(3) 171.8 1_655 yes
 O18 H18A O13 0.84 1.93 2.764(3) 174.0 2_766 yes
 O19 H19A O7 0.84 1.85 2.673(3) 166.7 1_645 yes
 O20 H20 O42 0.84 2.39 3.057(9) 136.7 2_666 yes
 O20 H20 O43 0.84 1.88 2.676(5) 158.2 . yes
 O20 H20 O44 0.84 1.83 2.622(5) 157.5 . yes
 O21 H21 O19 0.84 1.85 2.676(3) 166.5 . yes
 O22 H22 O14 0.84 1.86 2.695(3) 171.4 . yes
 O23 H23A O20 0.84 1.88 2.710(3) 168.7 1_655 yes
 O31 H31A O23 0.84 1.87 2.699(3) 170.2 . yes
 O32 H32A O21 0.84 1.84 2.671(3) 169.4 . yes
 O33 H33A O1 0.84 1.86 2.696(3) 173.2 1_745 yes

loop_
  _geom_torsion_atom_site_label_1
  _geom_torsion_atom_site_label_2
  _geom_torsion_atom_site_label_3
  _geom_torsion_atom_site_label_4
  _geom_torsion
  _geom_torsion_site_symmetry_1
  _geom_torsion_site_symmetry_2
  _geom_torsion_site_symmetry_3
  _geom_torsion_site_symmetry_4
  _geom_torsion_publ_flag
 O1 B1 O3 B3 -3.3(4) . . . . ?
 O1 B1 O4 B4 100.5(3) . . . . ?
 O1 B1 O6 B5 -99.0(3) . . . . ?
 O1 B2 O2 B3 4.2(4) . . . . ?
 O2 B2 O1 B1 -2.4(4) . . . . ?
 O2 B3 O3 B1 5.7(4) . . . . ?
 O3 B1 O1 B2 1.7(4) . . . . ?
 O3 B1 O4 B4 -138.0(3) . . . . ?
 O3 B1 O6 B5 140.6(3) . . . . ?
 O3 B3 O2 B2 -5.7(4) . . . . ?
 O4 B1 O1 B2 123.1(3) . . . . ?
 O4 B1 O3 B3 -123.0(3) . . . . ?
 O4 B1 O6 B5 18.5(4) . . . . ?
 O4 B4 O5 B5 -0.6(5) . . . . ?
 O5 B4 O4 B1 9.0(4) . . . . ?
 O5 B5 O6 B1 -12.2(5) . . . . ?
 O6 B1 O1 B2 -117.6(3) . . . . ?
 O6 B1 O3 B3 114.9(3) . . . . ?
 O6 B1 O4 B4 -16.8(4) . . . . ?
 O6 B5 O5 B4 2.1(5) . . . . ?
 O7 B2 O1 B1 178.6(3) . . . . ?
 O7 B2 O2 B3 -176.8(2) . . . . ?
 O8 B3 O2 B2 175.2(3) . . . . ?
 O8 B3 O3 B1 -175.3(3) . . . . ?
 O9 B4 O4 B1 -171.0(3) . . . . ?
 O9 B4 O5 B5 179.4(3) . . . . ?
 O10 B5 O5 B4 -178.5(3) . . . . ?
 O10 B5 O6 B1 168.5(3) . . . . ?
 O11 B11 O13 B13 -25.2(4) . . . . ?
 O11 B11 O14 B14 -125.0(3) . . . . ?
 O11 B11 O16 B15 124.3(3) . . . . ?
 O11 B12 O12 B13 -7.1(4) . . . . ?
 O12 B12 O11 B11 -5.6(4) . . . . ?
 O12 B13 O13 B11 15.1(4) . . . . ?
 O13 B11 O11 B12 20.4(4) . . . . ?
 O13 B11 O14 B14 115.8(3) . . . . ?
 O13 B11 O16 B15 -114.1(3) . . . . ?
 O13 B13 O12 B12 2.3(4) . . . . ?
 O14 B11 O11 B12 -97.1(3) . . . . ?
 O14 B11 O13 B13 92.7(3) . . . . ?
 O14 B11 O16 B15 4.2(4) . . . . ?
 O14 B14 O15 B15 -3.3(4) . . . . ?
 O15 B14 O14 B11 3.2(4) . . . . ?
 O15 B15 O16 B11 -4.9(5) . . . . ?
 O16 B11 O11 B12 141.3(3) . . . . ?
 O16 B11 O13 B13 -147.1(3) . . . . ?
 O16 B11 O14 B14 -3.3(4) . . . . ?
 O16 B15 O15 B14 4.1(4) . . . . ?
 O17 B12 O11 B11 174.8(3) . . . . ?
 O17 B12 O12 B13 172.5(3) . . . . ?
 O18 B13 O12 B12 -176.8(3) . . . . ?
 O18 B13 O13 B11 -165.8(3) . . . . ?
 O19 B14 O14 B11 -176.0(2) . . . . ?
 O19 B14 O15 B15 175.8(3) . . . . ?
 O20 B15 O15 B14 -175.6(3) . . . . ?
 O20 B15 O16 B11 174.8(3) . . . . ?
 C2 C3 C4 C5 -0.2(5) . . . . ?
 C3 C2 C7 C6 1.3(5) . . . . ?
 C3 C2 P1 C1 50.2(3) . . . . ?
 C3 C2 P1 C8 -70.3(3) . . . . ?
 C3 C2 P1 C14 170.8(2) . . . . ?
 C3 C4 C5 C6 1.4(5) . . . . ?
 C4 C5 C6 C7 -1.2(5) . . . . ?
 C5 C6 C7 C2 -0.1(5) . . . . ?
 C7 C2 C3 C4 -1.1(5) . . . . ?
 C7 C2 P1 C1 -134.7(3) . . . . ?
 C7 C2 P1 C8 104.8(3) . . . . ?
 C7 C2 P1 C14 -14.1(3) . . . . ?
 C8 C9 C10 C11 0.7(5) . . . . ?
 C9 C8 C13 C12 -1.0(5) . . . . ?
 C9 C8 P1 C1 -127.6(3) . . . . ?
 C9 C8 P1 C2 -7.0(3) . . . . ?
 C9 C8 P1 C14 112.5(3) . . . . ?
 C9 C10 C11 C12 -1.1(5) . . . . ?
 C10 C11 C12 C13 0.4(5) . . . . ?
 C11 C12 C13 C8 0.6(5) . . . . ?
 C13 C8 C9 C10 0.3(4) . . . . ?
 C13 C8 P1 C1 55.4(3) . . . . ?
 C13 C8 P1 C2 175.9(2) . . . . ?
 C13 C8 P1 C14 -64.5(3) . . . . ?
 C14 C15 C16 C17 -1.0(6) . . . . ?
 C15 C14 C19 C18 0.0(5) . . . . ?
 C15 C14 P1 C1 40.7(3) . . . . ?
 C15 C14 P1 C2 -80.6(3) . . . . ?
 C15 C14 P1 C8 161.3(3) . . . . ?
 C15 C16 C17 C18 1.1(6) . . . . ?
 C16 C17 C18 C19 -0.6(6) . . . . ?
 C17 C18 C19 C14 0.1(5) . . . . ?
 C19 C14 C15 C16 0.5(5) . . . . ?
 C19 C14 P1 C1 -141.6(3) . . . . ?
 C19 C14 P1 C2 97.1(3) . . . . ?
 C19 C14 P1 C8 -21.0(3) . . . . ?
 P1 C2 C3 C4 174.1(2) . . . . ?
 P1 C2 C7 C6 -173.9(2) . . . . ?
 P1 C8 C9 C10 -176.7(2) . . . . ?
 P1 C8 C13 C12 176.1(2) . . . . ?
 P1 C14 C15 C16 178.2(3) . . . . ?
 P1 C14 C19 C18 -177.7(3) . . . . ?
 C22 C23 C24 C25 -0.3(5) . . . . ?
 C23 C22 C27 C26 0.2(6) . . . . ?
 C23 C22 P21 C21 131.4(3) . . . . ?
 C23 C22 P21 C28 -108.5(3) . . . . ?
 C23 C22 P21 C34 11.2(3) . . . . ?
 C23 C24 C25 C26 0.3(6) . . . . ?
 C24 C25 C26 C27 0.0(7) . . . . ?
 C25 C26 C27 C22 -0.2(7) . . . . ?
 C27 C22 C23 C24 0.1(5) . . . . ?
 C27 C22 P21 C21 -48.1(3) . . . . ?
 C27 C22 P21 C28 71.9(3) . . . . ?
 C27 C22 P21 C34 -168.4(3) . . . . ?
 C28 C29 C30 C31 -0.1(6) . . . . ?
 C29 C28 C33 C32 0.9(6) . . . . ?
 C29 C28 P21 C21 113.0(3) . . . . ?
 C29 C28 P21 C22 -8.5(3) . . . . ?
 C29 C28 P21 C34 -126.2(3) . . . . ?
 C29 C30 C31 C32 -1.0(6) . . . . ?
 C30 C31 C32 C33 2.1(6) . . . . ?
 C31 C32 C33 C28 -2.0(6) . . . . ?
 C33 C28 C29 C30 0.2(5) . . . . ?
 C33 C28 P21 C21 -62.5(4) . . . . ?
 C33 C28 P21 C22 176.0(3) . . . . ?
 C33 C28 P21 C34 58.3(3) . . . . ?
 C34 C35 C36 C37 0.3(6) . . . . ?
 C35 C34 C39 C38 -0.3(6) . . . . ?
 C35 C34 P21 C21 -38.8(4) . . . . ?
 C35 C34 P21 C22 81.8(3) . . . . ?
 C35 C34 P21 C28 -158.4(3) . . . . ?
 C35 C36 C37 C38 -1.0(7) . . . . ?
 C36 C37 C38 C39 1.0(6) . . . . ?
 C37 C38 C39 C34 -0.4(6) . . . . ?
 C39 C34 C35 C36 0.3(6) . . . . ?
 C39 C34 P21 C21 148.8(3) . . . . ?
 C39 C34 P21 C22 -90.6(3) . . . . ?
 C39 C34 P21 C28 29.2(4) . . . . ?
 P21 C22 C23 C24 -179.5(3) . . . . ?
 P21 C22 C27 C26 179.7(3) . . . . ?
 P21 C28 C29 C30 -175.2(3) . . . . ?
 P21 C28 C33 C32 176.4(3) . . . . ?
 P21 C34 C35 C36 -172.1(3) . . . . ?
 P21 C34 C39 C38 172.0(3) . . . . ?

_shelx_res_file
;
TITL 2009srC115 in P-1
    2009src0115.res
    created by SHELXL-2018/3 at 13:15:39 on 29-Aug-2023
CELL 0.71073 10.1076 13.0403 20.626 84.364 82.811 76.492
ZERR 2 0.001 0.001 0.0015 0.005 0.004 0.004
LATT 1
SFAC C H B O P
UNIT 76 104 24 54 4
EQIV $1 -2+X,1+Y,+Z
EQIV $2 -1+X,1+Y,+Z
EQIV $3 -1+X,+Y,+Z
EQIV $4 -X,2-Y,-Z
EQIV $5 1+X,+Y,+Z
EQIV $6 2-X,1-Y,1-Z
EQIV $7 1+X,-1+Y,+Z
EQIV $8 1-X,1-Y,1-Z
EQIV $9 2+X,-1+Y,+Z
EADP O42 O41 O43 O44
SUMP 1 0.000001 1 2 1 3 1 4 1 5

L.S. 115
PLAN  5
SIZE 0.07 0.13 0.2
TEMP -153(2)
HTAB O7 O31_$1
HTAB O8 O32_$2
HTAB O9 O11_$3
HTAB O10 O6_$4
HTAB O17 O4_$5
HTAB O18 O13_$6
HTAB O19 O7_$7
HTAB O20 O44
HTAB O20 O43
HTAB O20 O42_$8
HTAB O21 O19
HTAB O22 O14
HTAB O23 O20_$5
HTAB O31 O23
HTAB O32 O21
HTAB O33 O1_$9
CONF
HTAB
BOND $H
fmap 2
acta
MORE -1
MERG 2
OMIT -7 2 3
REM <olex2.extras>
REM <HklSrc "%.\\2009src0115.hkl">
REM </olex2.extras>

WGHT    0.028700    6.857200
FVAR       0.31486   0.15817   0.21691   0.28100   0.34392
B1    3    0.072368    0.908521    0.135355    11.00000    0.01978    0.01583 =
         0.01921   -0.00218   -0.00214   -0.00454
B2    3    0.049602    1.065787    0.197120    11.00000    0.01997    0.01946 =
         0.01683   -0.00142   -0.00154   -0.00432
B3    3    0.268425    0.978846    0.152781    11.00000    0.01944    0.02057 =
         0.01580    0.00166   -0.00095   -0.00574
B4    3   -0.043742    0.759833    0.148759    11.00000    0.02458    0.01947 =
         0.01775   -0.00214    0.00183   -0.00698
B5    3   -0.065416    0.874644    0.051506    11.00000    0.03165    0.02322 =
         0.01982   -0.00198   -0.00171   -0.01188
O1    4   -0.007139    0.996579    0.173411    11.00000    0.01672    0.02016 =
         0.02275   -0.00628   -0.00004   -0.00399
O2    4    0.187898    1.058723    0.190130    11.00000    0.01760    0.02388 =
         0.02457   -0.00642   -0.00277   -0.00688
O3    4    0.215855    0.906722    0.129618    11.00000    0.01787    0.02053 =
         0.02324   -0.00510    0.00193   -0.00517
O4    4    0.044885    0.810003    0.168876    11.00000    0.02194    0.01877 =
         0.02022   -0.00132   -0.00100   -0.00645
O5    4   -0.100037    0.790337    0.089981    11.00000    0.03734    0.03051 =
         0.02470    0.00363   -0.00911   -0.02184
O6    4    0.025528    0.924942    0.069641    11.00000    0.02548    0.01994 =
         0.01849   -0.00207   -0.00048   -0.00850
O7    4   -0.028042    1.147331    0.230893    11.00000    0.01791    0.02663 =
         0.02995   -0.01123   -0.00300   -0.00441
AFIX 147
H7A   2   -0.111279    1.148825    0.229823    11.00000   -1.50000
AFIX   0
O8    4    0.402985    0.975580    0.141309    11.00000    0.01786    0.03357 =
         0.02992   -0.00650    0.00047   -0.00895
AFIX 147
H8    2    0.421007    1.024846    0.159489    11.00000   -1.50000
AFIX   0
O9    4   -0.083516    0.676816    0.184356    11.00000    0.03587    0.02680 =
         0.02512    0.00215   -0.00469   -0.01716
AFIX 147
H9A   2   -0.051968    0.668075    0.220791    11.00000   -1.50000
AFIX   0
O10   4   -0.124181    0.904319   -0.004870    11.00000    0.04703    0.03352 =
         0.02415    0.00462   -0.01246   -0.02374
AFIX 147
H10A  2   -0.099522    0.958416   -0.022910    11.00000   -1.50000
AFIX   0

B11   3    0.963884    0.548906    0.350417    11.00000    0.01990    0.01724 =
         0.01839   -0.00010   -0.00300   -0.00430
B12   3    1.090795    0.691037    0.330186    11.00000    0.02417    0.02415 =
         0.01826   -0.00318   -0.00131   -0.00827
B13   3    1.094010    0.592106    0.433901    11.00000    0.02134    0.02161 =
         0.01840   -0.00385   -0.00062   -0.00623
B14   3    0.993325    0.377119    0.302303    11.00000    0.01862    0.01690 =
         0.01689   -0.00176   -0.00154   -0.00350
B15   3    0.771331    0.474974    0.331929    11.00000    0.02088    0.02247 =
         0.02575   -0.00067   -0.00532   -0.00620
O11   4    1.000496    0.640513    0.311926    11.00000    0.02203    0.01816 =
         0.02074   -0.00008   -0.00298   -0.00590
O12   4    1.144964    0.663705    0.389993    11.00000    0.02821    0.03278 =
         0.02110   -0.00107   -0.00305   -0.01637
O13   4    0.996331    0.545959    0.418738    11.00000    0.02247    0.01805 =
         0.01775   -0.00152   -0.00273   -0.00727
O14   4    1.047441    0.452632    0.321649    11.00000    0.01612    0.01810 =
         0.02246   -0.00494   -0.00139   -0.00459
O15   4    0.855781    0.386729    0.305145    11.00000    0.01667    0.01964 =
         0.03446   -0.00575   -0.00410   -0.00462
O16   4    0.820905    0.552419    0.350946    11.00000    0.01587    0.01773 =
         0.02436   -0.00356   -0.00171   -0.00252
O17   4    1.133816    0.770459    0.292961    11.00000    0.04331    0.03378 =
         0.02227    0.00119   -0.00430   -0.02378
AFIX 147
H17A  2    1.101591    0.778389    0.256719    11.00000   -1.50000
AFIX   0
O18   4    1.146372    0.572684    0.492705    11.00000    0.02743    0.02782 =
         0.02112   -0.00038   -0.00462   -0.01215
AFIX 147
H18A  2    1.103896    0.533393    0.517551    11.00000   -1.50000
AFIX   0
O19   4    1.078679    0.288307    0.280151    11.00000    0.02061    0.01953 =
         0.03020   -0.00990    0.00120   -0.00508
AFIX 147
H19A  2    1.032956    0.250416    0.266373    11.00000   -1.50000
AFIX   0
O20   4    0.637155    0.475386    0.337233    11.00000    0.01661    0.03448 =
         0.06664   -0.01458   -0.00425   -0.00376
AFIX 147
H20   2    0.592723    0.526156    0.358734    11.00000   -1.50000
AFIX   0

C1    1    0.144318    0.993508    0.359720    11.00000    0.02422    0.03854 =
         0.03034   -0.00235   -0.01050   -0.00309
AFIX 137
H1A   2    0.160721    1.033529    0.317891    11.00000   -1.50000
H1B   2    0.056420    1.027611    0.382533    11.00000   -1.50000
H1C   2    0.142276    0.921134    0.351584    11.00000   -1.50000
AFIX   0
C2    1    0.293848    1.121368    0.418813    11.00000    0.02158    0.02102 =
         0.01814    0.00102   -0.00215    0.00060
C3    1    0.179109    1.196739    0.438362    11.00000    0.02569    0.02458 =
         0.02968    0.00236   -0.00037   -0.00161
AFIX  43
H3    2    0.091279    1.180762    0.442629    11.00000   -1.20000
AFIX   0
C4    1    0.191974    1.295357    0.451717    11.00000    0.03478    0.02566 =
         0.02962   -0.00024    0.00318    0.00651
AFIX  43
H4    2    0.112752    1.347216    0.465041    11.00000   -1.20000
AFIX   0
C5    1    0.318111    1.318948    0.445894    11.00000    0.04208    0.02185 =
         0.02591   -0.00050   -0.00474   -0.00382
AFIX  43
H5    2    0.326355    1.386504    0.456105    11.00000   -1.20000
AFIX   0
C6    1    0.431647    1.245920    0.425530    11.00000    0.03018    0.03034 =
         0.02466    0.00373   -0.00686   -0.00827
AFIX  43
H6    2    0.518911    1.262959    0.420704    11.00000   -1.20000
AFIX   0
C7    1    0.420123    1.146152    0.411737    11.00000    0.02066    0.02842 =
         0.02454   -0.00071   -0.00392    0.00248
AFIX  43
H7    2    0.499500    1.095194    0.397435    11.00000   -1.20000
AFIX   0
C8    1    0.241635    0.930017    0.488781    11.00000    0.01771    0.02325 =
         0.02221   -0.00103   -0.00131   -0.00208
C9    1    0.244768    0.980781    0.544834    11.00000    0.02097    0.02018 =
         0.02559   -0.00407    0.00075   -0.00432
AFIX  43
H9    2    0.261847    1.049850    0.540975    11.00000   -1.20000
AFIX   0
C10   1    0.222931    0.930237    0.606036    11.00000    0.02374    0.02690 =
         0.02346   -0.00369   -0.00020   -0.00541
AFIX  43
H10   2    0.223935    0.964788    0.644373    11.00000   -1.20000
AFIX   0
C11   1    0.199572    0.829013    0.611293    11.00000    0.01992    0.03027 =
         0.02331    0.00084    0.00170   -0.00665
AFIX  43
H11   2    0.186175    0.793911    0.653367    11.00000   -1.20000
AFIX   0
C12   1    0.195594    0.778682    0.555875    11.00000    0.02313    0.02453 =
         0.03192   -0.00112    0.00095   -0.00835
AFIX  43
H12   2    0.178854    0.709492    0.560074    11.00000   -1.20000
AFIX   0
C13   1    0.215927    0.828746    0.494202    11.00000    0.02468    0.02849 =
         0.02456   -0.00808    0.00082   -0.00613
AFIX  43
H13   2    0.212409    0.794534    0.456062    11.00000   -1.20000
AFIX   0
C14   1    0.432937    0.916689    0.371983    11.00000    0.02379    0.02128 =
         0.02318   -0.00370   -0.00046   -0.00272
C15   1    0.461898    0.929052    0.304592    11.00000    0.03348    0.03192 =
         0.02526    0.00151    0.00177    0.00461
AFIX  43
H15   2    0.397818    0.975142    0.278924    11.00000   -1.20000
AFIX   0
C16   1    0.583321    0.874463    0.275298    11.00000    0.04110    0.03587 =
         0.02735   -0.00227    0.00725    0.00387
AFIX  43
H16   2    0.603552    0.881498    0.229061    11.00000   -1.20000
AFIX   0
C17   1    0.676211    0.809148    0.313275    11.00000    0.03035    0.02765 =
         0.03537   -0.00769    0.00614    0.00240
AFIX  43
H17   2    0.761226    0.772159    0.292965    11.00000   -1.20000
AFIX   0
C18   1    0.647893    0.796948    0.379293    11.00000    0.02715    0.03326 =
         0.03289   -0.00397   -0.00486    0.00564
AFIX  43
H18   2    0.712568    0.751146    0.404786    11.00000   -1.20000
AFIX   0
C19   1    0.526585    0.850419    0.409097    11.00000    0.02640    0.03611 =
         0.02270   -0.00398   -0.00329   -0.00004
AFIX  43
H19   2    0.506796    0.841955    0.455305    11.00000   -1.20000
AFIX   0
P1    5    0.278287    0.990320    0.409186    11.00000    0.01875    0.02361 =
         0.01975   -0.00178   -0.00209   -0.00148

C21   1    0.547917    0.864515    0.004338    11.00000    0.08025    0.02499 =
         0.05131   -0.00845    0.02553   -0.01889
AFIX 137
H21A  2    0.626864    0.871724    0.025233    11.00000   -1.50000
H21B  2    0.463470    0.901969    0.028409    11.00000   -1.50000
H21C  2    0.554410    0.894880   -0.041021    11.00000   -1.50000
AFIX   0
C22   1    0.418193    0.710297   -0.041686    11.00000    0.03994    0.02807 =
         0.03699    0.01232    0.01463    0.00253
C23   1    0.447983    0.634857   -0.088306    11.00000    0.03348    0.03143 =
         0.04218    0.00855    0.00380   -0.00764
AFIX  43
H23   2    0.538005    0.592194   -0.094622    11.00000   -1.20000
AFIX   0
C24   1    0.349934    0.621014   -0.125223    11.00000    0.04969    0.04452 =
         0.04338    0.01857   -0.00203   -0.01909
AFIX  43
H24   2    0.372210    0.569606   -0.156788    11.00000   -1.20000
AFIX   0
C25   1    0.220048    0.682034   -0.116007    11.00000    0.04129    0.09016 =
         0.05130    0.03933   -0.00800   -0.01838
AFIX  43
H25   2    0.151242    0.673137   -0.141019    11.00000   -1.20000
AFIX   0
C26   1    0.189622    0.756860   -0.069952    11.00000    0.03875    0.08420 =
         0.05455    0.02524    0.01042    0.01316
AFIX  43
H26   2    0.099251    0.798981   -0.063782    11.00000   -1.20000
AFIX   0
C27   1    0.286841    0.771858   -0.032854    11.00000    0.04513    0.06232 =
         0.03821    0.01553    0.00752    0.00916
AFIX  43
H27   2    0.263940    0.823801   -0.001622    11.00000   -1.20000
AFIX   0
C28   1    0.514971    0.678816    0.087828    11.00000    0.04026    0.02460 =
         0.03165   -0.00236    0.01197   -0.01002
C29   1    0.393984    0.647539    0.109455    11.00000    0.03102    0.03243 =
         0.03622    0.00124    0.00731   -0.00550
AFIX  43
H29   2    0.329475    0.646829    0.079822    11.00000   -1.20000
AFIX   0
C30   1    0.369551    0.617486    0.175016    11.00000    0.03403    0.03978 =
         0.04133    0.00880    0.01189   -0.00748
AFIX  43
H30   2    0.287145    0.595901    0.190784    11.00000   -1.20000
AFIX   0
C31   1    0.462968    0.618394    0.217785    11.00000    0.04469    0.04419 =
         0.03886    0.00016    0.00742   -0.00972
AFIX  43
H31   2    0.443854    0.598548    0.262934    11.00000   -1.20000
AFIX   0
C32   1    0.583896    0.647743    0.195915    11.00000    0.05469    0.04569 =
         0.03733   -0.00476   -0.00093   -0.02473
AFIX  43
H32   2    0.649495    0.646030    0.225441    11.00000   -1.20000
AFIX   0
C33   1    0.609039    0.679738    0.130593    11.00000    0.04920    0.03566 =
         0.04099   -0.01031    0.01090   -0.02188
AFIX  43
H33   2    0.690933    0.702315    0.115183    11.00000   -1.20000
AFIX   0
C34   1    0.703367    0.656568   -0.030720    11.00000    0.03576    0.03044 =
         0.03056   -0.00686    0.00806   -0.01383
C35   1    0.768155    0.702677   -0.085262    11.00000    0.03848    0.05047 =
         0.03143    0.00485    0.00368   -0.01471
AFIX  43
H35   2    0.734266    0.774504   -0.099534    11.00000   -1.20000
AFIX   0
C36   1    0.880493    0.643776   -0.117891    11.00000    0.03627    0.07667 =
         0.03028    0.00899    0.00811   -0.01134
AFIX  43
H36   2    0.925781    0.674800   -0.155197    11.00000   -1.20000
AFIX   0
C37   1    0.929754    0.539705   -0.097697    11.00000    0.03410    0.06637 =
         0.03446   -0.01147    0.00397   -0.00681
AFIX  43
H37   2    1.007840    0.499324   -0.121588    11.00000   -1.20000
AFIX   0
C38   1    0.867381    0.493445   -0.043386    11.00000    0.03466    0.03948 =
         0.05266   -0.00699    0.00245   -0.00786
AFIX  43
H38   2    0.902703    0.421789   -0.029232    11.00000   -1.20000
AFIX   0
C39   1    0.753692    0.551796   -0.009870    11.00000    0.04048    0.03310 =
         0.04000   -0.00024    0.01033   -0.01298
AFIX  43
H39   2    0.709272    0.520580    0.027642    11.00000   -1.20000
AFIX   0
P21   5    0.546108    0.727905    0.005054    11.00000    0.04228    0.02261 =
         0.03269   -0.00096    0.01289   -0.00842

B21   3    1.397254    0.353782    0.282858    11.00000    0.01448    0.02388 =
         0.02573   -0.00009   -0.00116   -0.00519
O21   4    1.348298    0.276611    0.259254    11.00000    0.02080    0.03447 =
         0.03778   -0.01233   -0.00180   -0.00834
AFIX 147
H21   2    1.262443    0.290915    0.265525    11.00000   -1.50000
AFIX   0
O22   4    1.318730    0.442644    0.307012    11.00000    0.01575    0.02525 =
         0.03201   -0.00500    0.00046   -0.00585
AFIX 147
H22   2    1.236003    0.439929    0.309589    11.00000   -1.50000
AFIX   0
O23   4    1.534484    0.336578    0.280090    11.00000    0.01603    0.02925 =
         0.03521   -0.00752    0.00019   -0.00375
AFIX 147
H23A  2    1.555599    0.385015    0.297792    11.00000   -1.50000
AFIX   0

B31   3    1.644579    0.103741    0.195431    11.00000    0.01932    0.02622 =
         0.02921   -0.00363    0.00083   -0.00555
O31   4    1.699623    0.157661    0.235763    11.00000    0.02065    0.02702 =
         0.03175   -0.00877   -0.00080   -0.00328
AFIX 147
H31A  2    1.640922    0.211466    0.247472    11.00000   -1.50000
AFIX   0
O32   4    1.509366    0.125913    0.188157    11.00000    0.01754    0.02900 =
         0.04430   -0.01179    0.00097   -0.00375
AFIX 147
H32A  2    1.467806    0.173948    0.212435    11.00000   -1.50000
AFIX   0
O33   4    1.723816    0.025238    0.161638    11.00000    0.01730    0.03799 =
         0.04878   -0.02121   -0.00050   -0.00540
AFIX 147
H33A  2    1.805815    0.018811    0.168192    11.00000   -1.50000
AFIX   6

PART -2
O42   4    0.527324    0.451518    0.534290    31.00000    0.01625    0.05085 =
         0.06268   -0.03647    0.00385   -0.00253
H42A  2    0.570880    0.393247    0.553541    31.00000   -1.50000
H42B  2    0.577884    0.459433    0.497619    31.00000   -1.50000
PART -1
O41   4    0.437261    0.547701    0.509279    21.00000    0.01625    0.05085 =
         0.06268   -0.03647    0.00385   -0.00253
H41A  2    0.454180    0.600820    0.526678    21.00000   -1.50000
H41B  2    0.496958    0.493109    0.523270    21.00000   -1.50000
PART -3
O43   4    0.451311    0.602567    0.414909    41.00000    0.01625    0.05085 =
         0.06268   -0.03647    0.00385   -0.00253
H43A  2    0.417524    0.556979    0.397990    41.00000   -1.50000
H43B  2    0.422346    0.662077    0.392608    41.00000   -1.50000
PART -4
O44   4    0.445622    0.628906    0.386268    51.00000    0.01625    0.05085 =
         0.06268   -0.03647    0.00385   -0.00253
H44A  2    0.482593    0.602165    0.421828    51.00000   -1.50000
H44B  2    0.386336    0.591430    0.382870    51.00000   -1.50000
AFIX   0
HKLF 4


REM  2009srC115 in P-1
REM wR2 = 0.1676, GooF = S = 1.040, Restrained GooF = 1.040 for all data
REM R1 = 0.0742 for 9025 Fo > 4sig(Fo) and 0.1044 for all 12083 data
REM 735 parameters refined using 1 restraints

END

WGHT      0.0286      6.8572

REM Instructions for potential hydrogen bonds
HTAB O7 O31_$1
HTAB O8 O32_$2
HTAB O9 O11_$3
HTAB O10 O6_$4
HTAB O17 O4_$5
HTAB O18 O13_$6
HTAB O19 O7_$7
HTAB O20 O42_$8
HTAB O20 O43
HTAB O20 O44
HTAB C1 O2
HTAB C1 O17_$3
HTAB C13 O12_$3
HTAB C21 O10_$5
HTAB C21 O8
EQIV $10 -x+1, -y+2, -z
HTAB C21 O8_$10
HTAB C33 O5_$5
HTAB O21 O19
HTAB O22 O14
HTAB O23 O20_$5
HTAB O31 O23
HTAB O32 O21
HTAB O33 O1_$9

REM Highest difference peak  1.103,  deepest hole -1.031,  1-sigma level  0.085
Q1    1   0.4804  0.7263 -0.0158  11.00000  0.05    1.10
Q2    1   0.1277  0.7143 -0.0881  11.00000  0.05    0.46
Q3    1   0.6368  0.9478  0.0748  11.00000  0.05    0.45
Q4    1   0.4362  0.8714 -0.0177  11.00000  0.05    0.44
Q5    1   0.3128  1.0618  0.4122  11.00000  0.05    0.43
;
_shelx_res_checksum                6861
_shelx_hkl_file
;
   2   0   0  208.45   12.71   1
   2   0   0  201.33   14.23   1
  -2   0   0  206.05   13.59   1
  -2   0   0  197.65   13.24   1
  -3   0   0   33.15    2.86   1
  -3   0   0   37.98    2.92   1
   3   0   0   39.27    2.68   1
   3   0   0   35.34    3.36   1
   4   0   0  112.72    8.78   1
  -4   0   0  145.19    9.41   1
  -4   0   0  130.16    9.70   1
   4   0   0  143.94    9.70   1
   5   0   0   30.03    3.11   1
   5   0   0   30.62    2.89   1
  -5   0   0   32.14    3.33   1
  -6   0   0    4.70    1.50   1
   6   0   0    6.16    1.43   4
   6   0   0    4.75    1.61   1
  -7   0   0   53.21    4.33   1
   7   0   0   44.75    4.70   4
   7   0   0   56.44    4.44   1
   8   0   0   11.02    2.70   1
   8   0   0    8.11    1.27   4
  -8   0   0    5.26    1.58   1
   9   0   0    4.53    1.10   4
   9   0   0    3.50    1.77   1
  10   0   0   -0.64    0.89   4
 -10   0   0    1.27    1.69   1
 -11   0   0    9.55    2.37   1
 -12   0   0    3.10    2.81   1
 -11   1   0    3.75    1.93   1
  10  -1   0    2.80    2.00   1
 -10   1   0    2.44    1.63   1
  10  -1   0    5.24    1.98   4
   9  -1   0  118.35   11.34   4
  -9   1   0  138.69    9.57   1
   9  -1   0  131.75   11.30   1
  -8   1   0   22.74    3.11   1
   8  -1   0   16.11    2.10   4
   7  -1   0    9.39    2.44   1
  -7   1   0    6.28    1.52   1
   6  -1   0  169.02   10.47   1
   6  -1   0  144.22   13.96   1
   6  -1   0  149.11   11.22   4
  -6   1   0  167.57   11.05   1
  -5   1   0    2.00    2.59   1
   5  -1   0   -0.25    1.30   1
   4  -1   0 1525.42   92.41   1
   4  -1   0 1549.08   95.13   1
  -4   1   0 1480.92   94.33   1
  -4   1   0 1468.10   97.53   1
  -3   1   0  202.00   11.65   1
  -3   1   0  186.09   12.78   1
   3  -1   0  183.76   11.86   1
   3  -1   0  183.69   12.61   1
   2  -1   0 1145.57   72.47   1
  -2   1   0 1030.42   79.21   1
  -2   1   0 1181.91   72.86   1
   2  -1   0 1071.98   78.88   1
  -2  -1   0   18.86    1.66   1
   2   1   0   21.51    2.05   1
   2   1   0   16.15    1.68   1
  -2  -1   0   16.47    1.92   1
   3   1   0  356.11   22.28   1
  -3  -1   0  324.50   21.11   1
   3   1   0  344.70   22.32   1
  -3  -1   0  323.61   22.00   1
   4   1   0  126.67    8.06   1
   4   1   0  101.24    8.30   1
  -4  -1   0  117.74    8.25   1
   4   1   0  108.31    9.16   4
  -4  -1   0  125.96    9.74   1
   5   1   0    3.17    1.24   1
  -5  -1   0    2.42    1.17   1
   5   1   0    2.30    0.91   1
  -5  -1   0    1.76    0.89   1
   5   1   0    1.90    0.44   4
   6   1   0   65.93    4.58   4
   6   1   0   56.37    6.85   1
  -6  -1   0   59.40    6.00   1
  -6  -1   0   68.85    8.07   1
  -7  -1   0   16.74    2.25   1
   7   1   0   17.94    3.36   1
   7   1   0   14.24    1.66   4
   8   1   0    6.45    1.09   4
   8   1   0    8.74    2.16   1
   9   1   0    1.00    1.36   1
  -9  -1   0   -0.53    1.42   1
   9   1   0   -0.32    0.70   4
  10   1   0   31.77    3.69   4
 -12  -1   0    6.44    2.23   1
 -12   2   0    1.49    1.96   1
  12  -2   0    2.64    2.32   1
 -11   2   0    8.80    3.64   1
 -10   2   0   17.41    2.97   1
  10  -2   0   14.48    3.15   1
  10  -2   0   12.40    2.70   4
   9  -2   0   11.53    1.97   4
  -9   2   0   14.99    3.25   1
   9  -2   0   12.51    2.87   1
   8  -2   0   80.54    6.55   4
   8  -2   0   82.75    6.70   1
  -8   2   0   65.20    5.53   1
  -7   2   0   57.74    5.84   1
   7  -2   0   48.04    3.97   1
   7  -2   0   47.54    3.72   4
   6  -2   0  187.19   12.24   4
   6  -2   0  190.57   12.74   1
  -6   2   0  197.96   12.76   1
   5  -2   0   68.75    5.23   4
   5  -2   0   67.26    5.46   1
   5  -2   0   73.07    4.72   1
  -5   2   0   74.10    4.81   1
  -5   2   0   77.69    5.22   1
   4  -2   0   10.49    1.44   1
   4  -2   0   13.20    1.54   1
  -4   2   0   10.10    1.67   1
  -4   2   0   14.62    1.44   1
  -3   2   0 1357.13   89.24   1
   3  -2   0 1313.42   83.48   1
   3  -2   0 1307.77   81.70   1
  -3   2   0 1354.29   86.27   1
  -2   2   0  287.91   19.57   1
  -2   2   0  294.64   18.14   1
   2  -2   0  285.28   18.28   1
   2  -2   0  289.98   17.29   1
   1  -2   0   20.37    1.83   1
   1  -2   0   21.71    2.55   1
  -1   2   0   24.24    1.94   1
  -1   2   0   25.41    1.79   1
   0  -2   0   -0.43    0.43   1
   0  -2   0    0.13    0.31   5
   0   2   0    0.48    0.79   7
   0   2   0   -0.20    0.29   5
   0   2   0   -0.25    0.52   1
   0   2   0   -0.22    0.24   1
   0  -2   0   -0.10    0.39   1
   0  -2   0    0.24    0.66   7
  -1  -2   0  887.65   70.84   7
  -1  -2   0  902.30   55.32   1
   1   2   0  917.14   57.42   1
   1   2   0  902.71   58.44   1
  -1  -2   0  940.37   62.84   1
   1   2   0  834.97   58.17   3
   2   2   0   34.53    2.53   3
  -2  -2   0   29.65    2.27   3
  -2  -2   0   33.54    2.55   1
  -2  -2   0   34.78    2.13   1
   2   2   0   27.71    2.00   1
  -3  -2   0   60.59    4.33   1
  -3  -2   0   52.17    3.83   1
  -3  -2   0   61.35    4.50   3
   3   2   0   62.64    4.45   1
   3   2   0   65.85    4.75   1
   4   2   0 1328.22   77.33   1
   4   2   0 1296.91   83.51   1
  -4  -2   0 1281.00   83.24   1
  -4  -2   0 1354.32   79.52   1
  -4  -2   0 1324.77   80.33   3
   4   2   0 1290.61   93.80   4
   5   2   0  579.44   42.59   4
  -5  -2   0  594.65   37.32   1
  -5  -2   0  593.79   39.86   1
   5   2   0  620.34   40.73   1
   5   2   0  640.61   37.13   1
   6   2   0  258.50   18.02   4
  -6  -2   0  282.06   20.21   1
   6   2   0  284.52   17.41   1
  -6  -2   0  270.25   17.57   1
  -7  -2   0  187.92   12.33   1
   7   2   0  172.87   13.51   1
   7   2   0  175.72   16.23   4
   8   2   0  153.21   12.76   1
  -8  -2   0  169.09   12.26   1
   8   2   0  134.77   10.73   4
   9   2   0  109.77    9.73   4
 -10  -2   0    2.12    1.36   3
 -10  -2   0   -2.46    1.78   1
  11   2   0   16.00    2.81   1
 -11  -2   0   14.35    2.25   3
  12   2   0   -1.11    3.07   1
 -13  -2   0    0.13    1.84   1
  13   2   0   -1.45    2.15   1
 -12   3   0    2.99    2.07   1
  12  -3   0   -2.33    2.08   1
 -11   3   0   84.70   11.59   1
  10  -3   0    1.14    1.44   4
   9  -3   0   84.60    9.09   1
  -9   3   0  103.76    8.67   1
   9  -3   0   80.46    8.01   4
   8  -3   0  260.78   17.41   1
  -8   3   0  275.64   19.69   1
   8  -3   0  258.68   18.45   4
   7  -3   0  155.75   10.54   1
   7  -3   0  169.50   11.39   4
  -7   3   0  162.50   11.62   1
   6  -3   0   22.14    2.57   1
  -6   3   0   19.33    2.50   1
   6  -3   0   22.36    2.41   4
   5  -3   0   59.73    5.57   1
  -5   3   0   68.90    5.77   1
   5  -3   0   74.92    6.14   1
   5  -3   0   74.55    5.63   4
  -4   3   0   36.23    3.02   1
   4  -3   0   38.38    2.95   1
   4  -3   0   28.40    2.82   1
  -4   3   0   36.53    2.62   1
   3  -3   0  143.02   10.67   1
   3  -3   0  171.13   10.86   1
  -3   3   0  172.33   12.32   1
  -3   3   0  153.25   10.38   1
  -2   3   0  254.07   17.00   1
   2  -3   0  253.19   23.20   1
  -2   3   0  253.25   15.41   1
   2  -3   0  258.97   17.35   1
  -1   3   0 1032.49   86.09   1
   1  -3   0 1009.32   67.29   1
  -1   3   0 1003.53   62.31   1
   1  -3   0 1042.15   73.38   1
   0  -3   0  594.19   41.41   1
   0   3   0  587.28   40.72   7
   0   3   0  626.86   39.21   1
   0  -3   0  678.28   47.35   2
   0   3   0  564.56   41.67   5
   0  -3   0  609.11   36.57   1
   0  -3   0  574.80   42.63   7
   0  -3   0  586.35   38.66   5
   0   3   0  612.07   37.69   1
  -1  -3   0   24.46    2.06   1
   1   3   0   22.77    1.79   1
  -1  -3   0   24.03    1.92   6
  -1  -3   0   24.33    2.86   7
   1   3   0   23.22    2.68   7
  -1  -3   0   20.68    1.86   1
  -2  -3   0  458.33   27.74   1
  -2  -3   0  445.03   31.89   3
   2   3   0  458.06   29.17   3
  -2  -3   0  445.39   38.42   4
  -2  -3   0  467.75   30.60   1
   2   3   0  468.33   29.62   1
   2   3   0  413.35   27.40   1
  -3  -3   0  138.10   10.23   4
  -3  -3   0  140.55    9.25   1
   3   3   0  143.57    9.24   3
   3   3   0  139.90    9.51   1
   3   3   0  143.41    8.91   1
  -3  -3   0  142.10    9.57   1
  -3  -3   0  137.94    8.91   3
  -4  -3   0   58.23    5.02   1
   4   3   0   55.49    4.06   1
  -4  -3   0   55.88    3.84   1
  -4  -3   0   53.95    3.64   3
   4   3   0   47.33    4.57   1
  -5  -3   0   90.95   19.09   1
   5   3   0   85.87    6.76   1
   5   3   0   92.86    6.18   1
  -5  -3   0   73.64    5.69   3
  -5  -3   0  105.98   51.14   1
   6   3   0  220.57   15.09   1
  -6  -3   0  184.56   11.45   3
  -6  -3   0  174.07   13.75   1
   7   3   0  136.62    9.13   1
  -7  -3   0  142.11    8.79   3
  -8  -3   0    6.07    1.16   3
   8   3   0    5.99    1.64   1
  -9  -3   0   60.05    4.42   3
 -10  -3   0   -0.68    1.21   3
  10   3   0   -1.45    2.13   1
 -11  -3   0   19.36    2.81   3
 -11  -3   0   16.30    3.25   1
 -12  -3   0   19.68    3.17   1
  13   3   0    4.86    3.19   1
 -13  -3   0   -2.37    2.56   1
  11  -4   0   55.47    6.74   4
 -11   4   0   54.11    7.54   1
  11  -4   0   55.36    6.04   1
  10  -4   0   14.34    2.75   4
 -10   4   0   13.36    3.43   1
   9  -4   0   31.52    4.16   4
  -9   4   0   27.70    3.37   1
   8  -4   0    2.56    1.31   4
  -8   4   0    2.31    1.44   1
   7  -4   0    6.31    1.95   1
   6  -4   0   17.35    3.51   1
  -5   4   0   64.76    4.85   1
   5  -4   0   68.38    5.67   1
   5  -4   0   63.59    5.33   4
  -4   4   0   30.02    3.52   1
  -4   4   0   37.77    3.01   1
   4  -4   0   36.71    3.17   1
   3  -4   0  108.87    9.51   1
  -3   4   0  102.12    6.90   1
   3  -4   0  112.57    7.37   1
  -3   4   0  115.66    7.06   1
  -2   4   0  209.56   12.77   1
   2  -4   0  212.01   13.20   1
  -2   4   0  208.95   13.26   1
   2  -4   0  181.53   15.11   1
   1  -4   0  269.75   17.16   1
  -1   4   0  288.43   22.03   1
  -1   4   0  275.83   16.15   1
  -1   4   0  252.90   17.67   7
   1  -4   0  235.57   17.74   5
   1  -4   0  266.89   17.28   1
   0   4   0   58.65    4.34   1
   0  -4   0   50.85    4.90   7
   0  -4   0   54.68    3.66   2
   0  -4   0   51.92    3.93   1
   0   4   0   51.87    3.66   5
   0  -4   0   53.13    3.89   5
   1   4   0  280.06   19.66   7
   1   4   0  300.03   19.27   1
   1   4   0  293.21   22.68   2
   1   4   0  301.51   18.71   1
   1   4   0  301.13   23.17   6
  -1  -4   0  280.87   22.29   6
  -1  -4   0  305.93   18.96   1
   1   4   0  295.15   19.46   5
  -1  -4   0  299.71   20.27   1
  -1  -4   0  306.11   20.19   7
  -2  -4   0 1084.25   84.06   1
   2   4   0 1316.82   85.56   3
  -2  -4   0 1249.03   90.78   7
   2   4   0 1319.55   76.33   1
   2   4   0 1323.85   91.46   1
  -2  -4   0 1674.87  302.67   4
  -2  -4   0 1334.03   79.24   1
   3   4   0    1.65    0.75   1
  -3  -4   0    0.85    0.97   1
   3   4   0   -0.34    0.65   3
  -3  -4   0    2.15    1.05   1
   3   4   0    0.73    0.84   1
  -3  -4   0    0.62    0.51   3
  -3  -4   0    1.27    0.48   4
   4   4   0    0.71    0.66   1
   4   4   0    2.03    0.80   3
  -4  -4   0   -0.04    1.03   1
  -4  -4   0    1.12    0.72   1
  -5  -4   0  134.25    8.77   3
   5   4   0  112.00    9.25   1
  -5  -4   0  115.46    9.71   1
   5   4   0  115.61    9.03   1
  -5  -4   0  147.06    8.75   1
   6   4   0   45.00    3.72   1
  -6  -4   0   41.01    3.65   1
  -6  -4   0   51.79    3.96   1
  -6  -4   0   50.24    3.77   3
  -7  -4   0    0.47    0.91   3
   7   4   0    1.43    2.25   1
  -7  -4   0    0.73    1.01   1
   8   4   0    6.32    1.78   1
  -8  -4   0    3.71    1.02   3
   9   4   0   -0.57    1.47   1
  -9  -4   0    1.15    1.53   1
 -10  -4   0    3.82    1.63   1
 -10  -4   0    5.80    1.39   3
 -11  -4   0    3.87    0.98   3
 -12  -4   0    0.31    1.57   1
  12   4   0   -1.97    1.77   1
  13   4   0   -0.68    1.85   1
 -13  -4   0    2.24    2.18   1
 -11   5   0   16.48    3.86   1
  11  -5   0   10.75    3.80   1
  11  -5   0    5.41    2.85   4
 -10   5   0   11.87    2.44   1
  10  -5   0    9.30    2.71   1
   9  -5   0    4.71    1.64   4
  -9   5   0    5.34    2.01   1
   9  -5   0    8.82    3.67   1
   8  -5   0    2.43    1.79   4
   8  -5   0    5.26    1.77   1
  -7   5   0  652.48   45.59   1
   7  -5   0  693.53   45.19   4
   7  -5   0  666.93   51.10   1
   6  -5   0   96.29    7.93   4
   6  -5   0  109.18    7.34   1
  -6   5   0   97.61    9.40   1
  -5   5   0    3.71    1.20   1
   5  -5   0    2.24    1.07   1
   4  -5   0   15.16    2.09   1
  -4   5   0   12.65    1.56   1
   4  -5   0   12.16    2.14   1
  -3   5   0  173.19   15.19   1
   3  -5   0  180.55   13.50   1
  -3   5   0  200.64   12.51   1
   3  -5   0  205.14   14.45   1
  -2   5   0   20.99    2.24   1
   2  -5   0   19.53    2.44   1
   2  -5   0   23.64    3.02   1
  -2   5   0   23.76    2.23   1
   1  -5   0   90.32    7.44   1
  -1   5   0   87.80    6.26   7
   1  -5   0   83.09    6.23   5
   1  -5   0   80.01    5.54   1
  -1   5   0   88.72    9.45   1
  -1   5   0   91.24    6.21   1
   0  -5   0    7.26    1.26   1
   0   5   0    5.14    0.96   1
   0   5   0    8.02    1.02   5
   0  -5   0    8.72    0.99   5
   0   5   0    5.08    1.03   1
   0  -5   0    5.77    1.61   7
   0  -5   0    6.38    0.91   2
   0  -5   0    8.07    1.00   1
   0   5   0    6.75    1.35   7
   1   5   0  135.48    9.16   1
   1   5   0  136.22   10.61   6
   1   5   0  137.10    9.69   5
  -1  -5   0  143.24   10.22   7
   1   5   0  145.64    9.82   7
   1   5   0  133.45    9.04   2
   1   5   0  139.18    9.86   1
  -2  -5   0  540.04   35.68   1
   2   5   0  593.04   34.56   1
   2   5   0  637.22  108.26   2
  -2  -5   0  543.79   38.97   6
   2   5   0  547.64   33.86   3
  -2  -5   0  488.67   38.70   1
  -2  -5   0  543.27   40.31   7
   2   5   0  485.77  134.02   1
  -2  -5   0  668.94  121.22   4
  -3  -5   0   22.93    2.16   4
   3   5   0   24.33    2.12   3
   3   5   0   21.53    2.16   1
  -3  -5   0   24.07    2.13   1
  -3  -5   0   22.78    2.81   7
   3   5   0   22.50    1.90   1
  -4  -5   0   12.91    1.26   4
  -4  -5   0   15.69    1.59   1
   4   5   0   12.38    1.84   1
   4   5   0   11.21    1.32   1
   4   5   0   12.63    1.46   3
  -4  -5   0   15.93    5.04   1
  -5  -5   0    5.10    1.30   1
   5   5   0    6.78    1.17   3
   5   5   0    6.57    1.40   1
  -5  -5   0    8.42    1.21   3
   6   5   0    0.80    0.98   1
  -6  -5   0    0.24    0.51   3
  -6  -5   0   -0.28    0.85   1
  -7  -5   0    8.33    1.65   1
  -7  -5   0   12.17    1.25   3
  -7  -5   0   11.08    1.67   1
   7   5   0   13.58    2.37   1
  -8  -5   0   58.56    4.85   1
   8   5   0   43.09    5.78   1
  -8  -5   0   50.30    4.20   3
  -9  -5   0   77.69    5.69   1
  -9  -5   0   67.34    5.42   3
 -10  -5   0    3.91    0.94   3
 -10  -5   0    2.21    1.43   1
  10   5   0    5.05    1.88   1
  11   5   0   28.27    3.55   1
  12   5   0    1.22    1.94   1
 -12  -5   0    3.36    1.94   1
 -13  -5   0    2.90    2.18   1
  13   5   0    3.25    2.23   1
  10  -6   0   50.84    6.63   4
 -10   6   0   49.11    8.91   1
  10  -6   0   54.59    5.81   1
  -9   6   0   30.31    4.01   1
   9  -6   0   29.95    3.71   4
   9  -6   0   28.54    4.81   1
   8  -6   0    7.09    2.69   1
   8  -6   0   10.51    3.17   4
  -8   6   0    5.93    2.05   1
   7  -6   0    5.59    2.53   1
   7  -6   0    0.12    1.47   4
  -7   6   0    2.16    1.35   1
   6  -6   0    6.79    1.83   4
   6  -6   0    6.55    1.85   1
   5  -6   0  247.28   16.96   1
   5  -6   0  259.86   18.10   4
  -5   6   0  259.20   18.16   1
   5  -6   0  228.37   45.99   1
   4  -6   0   27.67    2.60   1
   4  -6   0   23.08    3.01   4
  -4   6   0   24.99    2.94   1
   4  -6   0   29.04    3.87   1
   3  -6   0   33.97    2.79   1
   3  -6   0   33.17    3.37   1
  -3   6   0   37.10    3.57   1
   3  -6   0   30.83    3.37   4
   2  -6   0    2.77    1.00   1
  -2   6   0    0.30    0.60   1
  -2   6   0   -0.45    1.05   7
   2  -6   0    1.15    1.19   1
   2  -6   0    0.48    0.93   5
  -2   6   0    1.89    1.16   1
   1  -6   0  780.38   51.53   1
   1  -6   0  797.33  105.12   2
  -1   6   0  803.79   55.15   1
  -1   6   0  774.18   55.50   7
   1  -6   0  776.40   50.80   1
   1  -6   0  787.53   51.51   5
  -1   6   0  769.44   74.80   1
   0   6   0  163.47   12.51   7
   0   6   0  159.75   11.35   5
   0   6   0  172.28   10.80   1
   0  -6   0  156.43   10.24   5
   0  -6   0  160.40   10.58   1
   0   6   0  157.87   11.44   6
   0   6   0  169.00   11.54   1
   0  -6   0  170.07   10.99   2
   0  -6   0  164.26   12.58   7
   0  -6   0  163.84   10.56   1
   1   6   0  468.34   33.98   7
   1   6   0  488.12   32.21   5
  -1  -6   0  453.12   29.27   1
   1   6   0  482.20   32.94   1
   1   6   0  509.02   29.85   1
  -1  -6   0  454.89   31.54   7
  -1  -6   0  562.88   80.75   4
   1   6   0  447.18   33.53   6
  -2  -6   0   50.45    5.55   4
   2   6   0   43.15    3.21   2
   2   6   0   39.30    3.66   7
  -2  -6   0   43.03    3.87   6
  -2  -6   0   43.09    3.92   1
   2   6   0   44.26    3.10   3
   2   6   0   43.61   15.61   1
  -2  -6   0   42.49    3.74   7
   2   6   0   51.71    4.00   1
   2   6   0   40.95    3.11   5
  -3  -6   0  412.89   31.07   4
   3   6   0  412.32   25.89   1
   3   6   0  420.36   87.48   2
  -3  -6   0  410.71   27.63   7
   3   6   0  436.52   26.85   1
   3   6   0  388.37   26.22   3
  -3  -6   0  389.18   25.39   1
  -3  -6   0  346.94   27.52   1
  -3  -6   0  375.54   27.47   6
  -4  -6   0   29.87    2.76   1
  -4  -6   0   27.00    2.47   1
  -4  -6   0   23.21    2.92   7
   4   6   0   25.19    2.70   1
   4   6   0   31.17    2.24   3
  -4  -6   0   29.31    2.46   4
   4   6   0   26.59    2.97   1
  -5  -6   0  129.34   10.59   1
   5   6   0  138.24   10.04   3
   5   6   0  165.02    9.65   1
  -5  -6   0  146.07    9.55   4
  -5  -6   0  130.84    9.49   1
  -6  -6   0   45.27    3.72   1
  -6  -6   0   37.78    3.86   1
  -6  -6   0   36.49    3.28   3
   6   6   0   45.24    3.41   1
  -7  -6   0  154.07   10.66   3
   7   6   0  165.19   10.97   1
  -7  -6   0  145.89   10.65   1
  -7  -6   0  170.59   12.78   1
   8   6   0   78.51    7.51   1
  -8  -6   0   84.21    7.23   3
   9   6   0   15.74    3.22   1
  -9  -6   0   12.96    1.92   3
 -10  -6   0   28.78    3.37   1
 -10  -6   0   24.95    2.50   3
  11   6   0   -3.18    2.39   1
 -11  -6   0   -0.75    1.70   1
  12   6   0    1.98    2.08   1
 -13  -6   0    2.63    2.25   1
  13   6   0    2.38    2.28   1
  10  -7   0    4.82    2.24   4
  10  -7   0    5.06    2.23   1
 -10   7   0   -0.95    2.16   1
   9  -7   0   23.39    3.63   1
  -9   7   0   24.10    3.21   1
   9  -7   0   19.48    4.24   4
  -8   7   0   32.64    3.38   1
   8  -7   0   26.32    3.78   4
   7  -7   0  112.34    9.64   4
  -7   7   0  100.74    8.85   1
   7  -7   0  108.91    9.95   1
  -6   7   0    4.83    1.67   1
   6  -7   0    5.33    2.09   4
   6  -7   0    3.03    1.81   1
   5  -7   0  181.29   14.63   4
  -5   7   0  178.43   11.76   1
   5  -7   0  144.33   20.46   1
   5  -7   0  180.27   12.85   1
   4  -7   0  105.56    8.04   4
   4  -7   0   98.04    7.95   1
  -4   7   0   98.38    8.06   1
   4  -7   0   98.23    7.62   1
   3  -7   0   73.60    6.09   4
   3  -7   0   74.06    5.16   5
  -3   7   0   76.33    5.18   1
   3  -7   0   60.59    5.35   1
   3  -7   0   62.31    7.94   1
   2  -7   0   37.02    3.60   1
  -2   7   0   38.92    4.18   7
   2  -7   0   35.62    4.13   4
   2  -7   0   32.23    3.35   1
  -2   7   0   41.10    3.41   1
   2  -7   0   32.84    3.14   5
  -1   7   0   26.16    3.24   7
   1  -7   0   23.64    2.64   2
   1  -7   0   20.65    2.21   1
  -1   7   0   24.85    2.73   1
   1  -7   0   19.56    1.76   5
  -1   7   0   25.89    2.13   1
   1  -7   0   22.64    3.20   4
   0  -7   0   15.04    1.53   5
   0   7   0   11.81    1.70   1
   0  -7   0   12.20    2.04   4
   0  -7   0   14.33    1.40   1
   0  -7   0   10.36    1.46   1
   0   7   0   11.43    1.78   1
   0  -7   0   12.68    2.01   7
   0   7   0   10.35    1.82   7
   1   7   0  118.08    8.17   7
   1   7   0  102.09    7.21   1
   1   7   0  106.56    7.30   5
  -1  -7   0  107.55    8.31   7
   1   7   0   97.14    7.65   1
  -1  -7   0  103.74    6.43   1
  -1  -7   0  120.29    9.27   4
   1   7   0  105.35    7.57   6
   2   7   0   67.99    5.24   5
   2   7   0   60.46    6.38   7
  -2  -7   0   67.27    6.08   7
   2   7   0   58.08    5.08   3
   2   7   0   65.98    4.46   1
   2   7   0   76.94    4.67   2
  -2  -7   0   62.91    4.56   1
  -2  -7   0   63.79    4.98   1
   2   7   0   62.23    4.42   1
  -2  -7   0   64.56    6.38   4
  -3  -7   0    1.36    1.22   4
  -3  -7   0    1.49    0.88   6
  -3  -7   0    4.03    1.78   7
   3   7   0    1.44    1.69   2
  -3  -7   0    0.61    0.62   1
   3   7   0    2.94    2.56   1
   3   7   0    2.14    1.12   3
  -4  -7   0   63.36    5.56   4
  -4  -7   0   68.21    5.26   1
  -4  -7   0   67.85    5.57   7
   4   7   0   58.67   14.39   2
   4   7   0   65.47    5.35   1
  -4  -7   0   53.25    5.71   6
   4   7   0   75.53    6.06   3
  -4  -7   0   61.22    4.75   1
   4   7   0   65.68    5.92   1
   5   7   0    1.09    0.63   3
  -5  -7   0    3.87    1.65   1
   5   7   0    2.88    1.27   1
  -5  -7   0    1.80    1.51   7
  -5  -7   0    1.06    0.80   1
   6   7   0   46.85    5.12   1
   6   7   0   52.53    4.06   3
  -6  -7   0   57.55    4.75   1
   7   7   0    6.63    1.47   1
  -7  -7   0    4.78    1.85   1
  -7  -7   0    4.72    1.32   3
  -8  -7   0   -0.95    0.73   3
   8   7   0   -1.81    1.52   1
   9   7   0    4.95    1.71   1
  -9  -7   0    6.42    1.45   3
 -10  -7   0   -0.63    0.83   3
 -10  -7   0   -1.24    1.49   1
  10   7   0   -1.35    2.18   1
  11   7   0    0.90    2.49   1
  12   7   0   20.42    4.86   1
 -12  -7   0   18.93    3.80   1
   9  -8   0   -2.22    2.45   4
  -9   8   0    1.75    2.14   1
   9  -8   0    2.10    2.24   1
   8  -8   0    4.88    2.44   4
   8  -8   0    8.37    2.59   1
  -8   8   0    5.09    1.97   1
   7  -8   0  197.68   16.85   4
   7  -8   0  218.39   16.99   1
  -7   8   0  220.01   19.57   1
   6  -8   0   -0.33    2.16   1
   6  -8   0   -0.75    1.62   4
  -5   8   0   -1.51    1.15   1
   5  -8   0   -0.14    1.88   4
   5  -8   0    1.14    1.39   1
   4  -8   0  100.15    9.40   1
  -4   8   0  102.32    7.60   1
   4  -8   0   95.34    8.05   4
   4  -8   0   98.73    7.07   5
   4  -8   0  100.45    9.97   1
  -3   8   0   34.47    3.58   1
   3  -8   0   35.26    4.06   4
   3  -8   0   41.94    3.55   1
   3  -8   0   37.15    3.17   5
   3  -8   0   38.09    3.79   1
   2  -8   0    6.56    2.14   4
   2  -8   0    5.15    1.37   1
   2  -8   0    6.02    1.23   5
  -2   8   0    5.70    1.48   1
   2  -8   0    4.59    1.43   1
   1  -8   0  342.21   23.32   1
   1  -8   0  340.19   21.70   1
   1  -8   0  345.90   24.09   4
   1  -8   0  356.68   21.03   5
  -1   8   0  361.69   27.58   7
   0  -8   0    2.10    1.26   4
   0   8   0    1.09    1.04   1
   0  -8   0    2.32    1.60   1
   0   8   0    1.57    1.23   7
   0  -8   0    3.06    0.90   5
   0  -8   0    1.68    1.25   1
   0   8   0    1.47    1.09   6
   1   8   0   89.53    7.24   7
   1   8   0   98.96    7.81   1
  -1  -8   0   98.51    6.58   7
  -1  -8   0   80.57    5.51   1
   1   8   0   93.28    6.32   6
   1   8   0   90.85    6.54   1
  -1  -8   0   83.67    6.64   4
   1   8   0   89.91    5.89   5
  -2  -8   0  131.20   10.31   1
  -2  -8   0  133.72   11.82   7
   2   8   0  144.21    8.92   5
   2   8   0  135.17   10.49   1
   2   8   0  140.37   11.24   7
  -2  -8   0  158.01   12.91   4
   2   8   0  138.69   11.21   1
   3   8   0   -1.05    1.35   1
  -3  -8   0    0.00    0.84   1
  -3  -8   0    0.01    0.59   1
  -3  -8   0    3.20    2.74   7
   3   8   0   -0.46    0.77   5
  -3  -8   0    0.39    1.36   4
   3   8   0    0.16    1.26   3
   3   8   0    0.70    1.13   2
  -4  -8   0  234.25   17.79   4
   4   8   0  226.43   59.28   2
  -4  -8   0  259.52   16.16   1
  -4  -8   0  251.26   17.15   1
  -4  -8   0  208.55   19.19   6
   4   8   0  263.43   58.04   1
  -4  -8   0  257.41   20.26   7
   4   8   0  234.02   18.05   3
   5   8   0    9.84    1.61   1
  -5  -8   0   12.10    1.30   4
  -5  -8   0   10.63    2.73   7
  -5  -8   0   10.87    1.53   1
  -6  -8   0   11.28    2.57   7
   6   8   0    7.42    1.60   1
  -6  -8   0    8.00    1.77   1
  -6  -8   0    7.37    1.02   4
   6   8   0    7.36    1.18   3
  -7  -8   0   63.69    6.69   7
   7   8   0   58.00    4.30   3
  -7  -8   0   46.79    5.14   1
   7   8   0   52.81    4.48   1
   8   8   0  483.69   33.03   1
  -8  -8   0  485.96   32.90   1
   9   8   0   37.56    3.88   1
  10   8   0   -0.43    1.57   1
 -10  -8   0    3.93    1.87   1
  11   8   0   61.11    5.72   1
  12   8   0    1.30    1.93   1
 -12  -8   0    4.04    2.98   1
  -9   9   0   55.94   10.05   1
   9  -9   0   49.93    7.28   1
   9  -9   0   45.79    5.70   4
  -8   9   0    2.16    1.83   1
   8  -9   0    1.12    1.93   4
   8  -9   0    3.09    2.78   1
   7  -9   0   31.10    5.27   1
   7  -9   0   33.25    4.72   4
  -7   9   0   36.82    4.21   1
   6  -9   0   12.09    3.08   1
   6  -9   0    8.60    4.13   4
   5  -9   0    4.50    3.23   4
   4  -9   0    4.44    1.78   1
   4  -9   0    4.31    2.15   4
   4  -9   0    6.51    1.51   5
  -4   9   0    3.93    1.29   1
   3  -9   0  165.42   16.54   1
   3  -9   0  154.48   14.36   4
  -3   9   0  183.40   13.87   1
   3  -9   0  155.20   10.75   5
   3  -9   0  165.44   12.74   1
   2  -9   0   -0.81    0.85   1
  -2   9   0   -0.43    1.03   1
   2  -9   0   -0.69    0.88   5
   2  -9   0   -2.54    1.98   4
   1  -9   0    2.43    1.40   1
   1  -9   0    5.32    2.19   4
   0   9   0  147.63   12.29   6
   0  -9   0  176.04   12.37   4
   0   9   0  181.57   14.23   1
   0  -9   0  160.35   11.09   1
   1   9   0  210.27   15.14   6
  -1  -9   0  208.05   16.82   4
  -1  -9   0  198.13   15.73   7
  -1  -9   0  214.84   14.18   1
   1   9   0  215.49   13.90   5
  -1  -9   0  119.58   55.27   1
   1   9   0  217.91   16.33   1
   2   9   0   40.28    3.34   5
  -2  -9   0   44.86    4.25   7
  -2  -9   0   40.03    3.90   4
   2   9   0   45.34    3.97   1
  -2  -9   0   47.77    3.86   1
  -3  -9   0   14.27    1.97   4
   3   9   0   17.12    1.82   2
  -3  -9   0   23.56    3.84   7
  -3  -9   0   20.26    2.53   1
  -3  -9   0   16.03    2.44   1
   3   9   0   23.80    2.95   1
   4   9   0   19.51    6.79   1
  -4  -9   0   26.26    3.57   1
  -4  -9   0   23.83    3.36   7
  -4  -9   0   19.37    2.09   1
   4   9   0   20.00    2.24   2
  -4  -9   0   24.30    2.62   4
  -5  -9   0  198.21   18.08   1
  -5  -9   0  220.42   16.69   7
   5   9   0  161.14   72.40   1
   5   9   0  252.64   66.69   2
  -5  -9   0  241.86   17.69   4
   6   9   0   16.61    5.29   2
  -6  -9   0   16.69    3.75   7
   6   9   0   13.96    1.92   1
  -6  -9   0   13.23    2.22   1
  -6  -9   0   13.41    2.57   1
  -6  -9   0   16.25    2.05   4
   6   9   0   13.63    3.30   3
  -7  -9   0    2.67    2.12   7
  -8  -9   0    9.12    2.64   7
   9   9   0    9.83    2.49   1
  -9  -9   0   13.86    2.72   7
  10   9   0    0.61    1.45   1
 -10  -9   0   -0.37    1.80   1
 -11  -9   0    4.11    2.50   1
  11   9   0    3.83    2.59   1
 -12  -9   0   14.29    2.92   1
  12   9   0   10.59    3.20   1
   8 -10   0   -2.83    2.09   4
   8 -10   0   -1.23    1.50   1
   8 -10   0   -0.58    1.18   5
   7 -10   0    1.63    1.35   5
   7 -10   0    0.30    2.04   1
   7 -10   0    6.25    2.71   4
  -7  10   0    3.77    2.51   1
   6 -10   0    9.31    2.91   4
   6 -10   0    4.58    1.48   5
  -6  10   0    4.38    2.17   1
  -5  10   0   16.91    2.76   1
   5 -10   0   16.32    2.19   5
   5 -10   0   18.78    4.17   4
   5 -10   0   22.83    3.46   1
   4 -10   0   20.77    2.54   1
   4 -10   0   24.64    4.57   4
  -4  10   0   17.60    2.37   1
   4 -10   0   20.64    2.49   5
   3 -10   0    1.87    0.78   5
   3 -10   0    6.07    2.53   4
   3 -10   0    1.81    1.20   1
   3 -10   0    2.60    1.11   1
  -3  10   0    2.95    1.19   1
  -2  10   0  113.35    8.34   1
   2 -10   0  116.88    8.23   5
   2 -10   0  108.01    9.47   4
   2 -10   0  101.20    8.13   1
   2 -10   0  111.84   11.11   1
   1 -10   0   10.10    2.77   4
  -1  10   0    5.21    1.26   6
  -1  10   0    4.76    1.47   1
   1 -10   0    6.28    1.57   1
   1 -10   0    6.20    1.12   5
   0 -10   0   -0.35    2.05   4
   0 -10   0    0.04    0.97   1
   1  10   0   16.95    2.40   1
  -1 -10   0   11.42    1.99   4
  -1 -10   0   12.44    2.01   1
   1  10   0   12.81    1.33   5
  -1 -10   0   11.94    1.75   1
  -2 -10   0   18.79    3.27   7
   2  10   0   21.28    2.04   5
  -2 -10   0   18.55    2.22   1
   2  10   0   18.72    2.14   1
  -2 -10   0   20.20    2.19   1
  -3 -10   0   21.13    3.31   7
  -3 -10   0   26.20    3.64   4
   3  10   0   27.14    2.34   5
   3  10   0   27.82    3.50   1
  -3 -10   0   23.90    2.50   1
  -4 -10   0   75.72    6.19   1
  -4 -10   0   81.84    7.30   1
  -4 -10   0   81.95    7.34   4
   4  10   0   80.95    7.73   5
   4  10   0   70.41    5.20   1
  -4 -10   0   87.60    7.97   7
   4  10   0   78.73    6.65   2
  -5 -10   0  114.73   10.26   4
   5  10   0  114.67    8.33   2
  -5 -10   0  111.10    9.09   1
  -5 -10   0   92.58   10.74   1
  -5 -10   0   98.65   10.39   7
   6  10   0  125.51   48.03   2
  -6 -10   0  153.47   11.93   4
  -6 -10   0  158.79   12.67   7
  -6 -10   0  163.35   13.53   1
  -6 -10   0  152.62   14.12   1
   6  10   0  161.47   11.59   1
  -7 -10   0   28.46    3.68   1
  -7 -10   0   32.76    3.20   4
   7  10   0   30.49    5.70   1
   7  10   0   21.89    6.86   2
  -7 -10   0   35.08    4.51   7
  -8 -10   0   77.45    8.06   7
   8  10   0   73.19    7.99   1
  -9 -10   0    9.44    2.12   1
  -9 -10   0   12.07    3.14   7
   9  10   0   11.88    2.36   1
  10  10   0    7.47    2.18   1
 -10 -10   0   12.37    2.95   7
 -11 -10   0    4.36    2.51   7
 -11 -10   0    8.18    2.40   1
  11  10   0    3.21    2.62   1
 -12 -10   0   10.50    2.77   1
 -12 -10   0    8.10    3.96   7
   7 -11   0   24.81    4.31   4
   7 -11   0   26.64    3.70   5
   7 -11   0   30.49    4.93   1
  -6  11   0    1.09    1.91   1
   6 -11   0    1.46    2.20   4
   6 -11   0    2.69    1.39   5
   6 -11   0    3.44    2.07   1
   5 -11   0   13.80    3.33   4
  -5  11   0   10.16    1.91   1
   5 -11   0   13.43    2.13   1
   4 -11   0   15.93    2.20   1
   4 -11   0   15.73    1.91   5
  -4  11   0   15.55    2.89   1
   3 -11   0   28.77    3.39   5
   3 -11   0   35.40    3.92   4
   3 -11   0   36.64    3.74   1
  -3  11   0   27.43    3.63   1
   2 -11   0   58.49    4.75   1
   2 -11   0   44.40    5.64   4
  -2  11   0   57.10    5.21   1
   2 -11   0   46.06    3.61   5
   1 -11   0    3.14    0.97   5
   1 -11   0    3.89    1.39   1
  -1  11   0    3.28    1.49   6
  -1  11   0    4.96    1.63   1
   1 -11   0    1.96    1.39   1
   0 -11   0  192.90   15.78   4
   0 -11   0  179.22   11.96   1
   0  11   0  159.24   12.64   6
   0  11   0  182.15   15.37   1
  -1 -11   0   35.26    3.64   1
  -1 -11   0   28.31    3.43   1
   1  11   0   32.07    3.26   1
  -1 -11   0   25.95    4.03   4
   2  11   0   23.45    2.73   1
  -2 -11   0   18.94    3.41   4
   2  11   0   18.33    1.70   5
  -2 -11   0   12.36    3.65   7
  -2 -11   0   16.22    2.33   1
  -2 -11   0   20.40    2.27   1
   3  11   0   58.76    5.74   1
  -3 -11   0   65.84    4.79   4
   3  11   0   66.15    5.58   5
  -3 -11   0   55.89    4.86   1
  -3 -11   0   62.18    7.28   7
  -3 -11   0   62.60    6.43   1
  -4 -11   0   68.96    5.91   1
   4  11   0   70.20    6.71   5
   4  11   0   71.04    6.03   1
  -4 -11   0   67.62    7.54   7
  -4 -11   0   69.69    6.02   1
  -4 -11   0   64.67    5.07   4
   5  11   0   99.48    7.20   2
  -5 -11   0  102.95    7.51   1
  -5 -11   0   94.88    8.76   4
   5  11   0   94.29    9.61   1
   5  11   0  106.64   10.52   5
  -5 -11   0   92.31    9.98   1
  -5 -11   0  100.06    9.65   7
  -6 -11   0    5.02    1.30   4
  -6 -11   0    3.92    2.40   7
   6  11   0    4.47    2.64   1
  -6 -11   0    8.43    3.12   1
  -7 -11   0    1.55    1.15   4
   7  11   0   -0.60    1.34   2
  -7 -11   0    5.80    3.47   7
   7  11   0    3.47    2.81   1
  -7 -11   0    1.44    1.82   1
  -8 -11   0   13.17    2.72   1
   8  11   0   11.94    2.50   1
  -8 -11   0    7.44    2.67   7
   8  11   0    6.26    2.81   2
  -9 -11   0   20.21    3.66   7
  -9 -11   0   27.68    4.35   1
   9  11   0   21.86    3.78   1
  10  11   0   34.53    4.41   1
 -10 -11   0   41.34    4.74   1
 -10 -11   0   42.08    6.51   7
 -11 -11   0    6.72    2.74   7
 -11 -11   0    6.14    2.32   1
   7 -12   0   31.54    6.30   4
   7 -12   0   33.85    5.27   1
   6 -12   0   10.75    2.74   1
   5 -12   0   24.90    3.01   1
   5 -12   0   26.02    3.79   4
   4 -12   0    0.32    2.21   1
   4 -12   0   -0.28    1.99   4
   3 -12   0    0.31    1.34   1
   3 -12   0    0.87    0.67   5
   2 -12   0   12.37    3.60   4
  -2  12   0    6.96    2.06   6
   2 -12   0    8.27    1.51   5
   1 -12   0    2.27    1.16   1
   1 -12   0    3.30    1.92   4
  -1  12   0    0.79    1.02   1
   0 -12   0    6.19    1.70   1
   0  12   0    0.64    1.39   1
   0  12   0    2.97    1.09   6
   0 -12   0    2.88    2.97   4
   1  12   0    3.44    1.79   1
  -1 -12   0    4.37    1.98   4
  -1 -12   0    1.87    1.59   1
  -2 -12   0   25.63    2.68   1
   2  12   0   25.56    3.19   1
  -2 -12   0   30.45    4.19   4
  -2 -12   0   31.36    4.21   7
   2  12   0   29.73    2.81   5
  -3 -12   0   33.21    3.85   4
   3  12   0   37.44    3.59   5
   3  12   0   30.06    4.96   1
  -3 -12   0   44.88    4.84   1
  -3 -12   0   33.62    5.06   7
   4  12   0    0.07    1.60   1
  -4 -12   0    4.18    2.18   4
  -4 -12   0    7.57    3.49   7
   4  12   0    2.29    1.01   5
  -5 -12   0    2.62    1.16   1
  -5 -12   0    1.55    1.86   7
  -5 -12   0    1.89    1.01   4
   5  12   0    4.25    1.76   1
   6  12   0   -0.18    1.29   2
  -6 -12   0   -2.09    2.01   7
  -6 -12   0   -0.10    1.16   1
  -6 -12   0    2.32    1.46   4
   6  12   0    2.55    2.28   1
  -7 -12   0    0.08    2.72   7
   7  12   0    1.39    1.55   2
  -8 -12   0   30.92    3.99   1
  -8 -12   0   42.44    5.82   7
   8  12   0   30.16    4.08   2
  -9 -12   0    2.93    1.79   1
   9  12   0    0.39    1.34   2
 -10 -12   0   36.90    4.66   1
 -10 -12   0   27.28    5.27   7
   6 -13   0    3.17    1.74   1
   5 -13   0    2.71    2.36   4
   5 -13   0    1.10    1.59   1
   4 -13   0   16.12    2.42   1
   4 -13   0   18.31    4.28   4
   3 -13   0   22.43    3.18   1
   2 -13   0    6.77    1.85   1
  -2  13   0    5.16    1.55   6
  -1  13   0   18.60    2.42   6
   0 -13   0   35.21    6.75   4
   0  13   0   48.25    7.23   1
   0 -13   0   46.04    4.52   1
  -1 -13   0  417.77   35.48   4
   1  13   0  440.23   81.05   1
  -1 -13   0  443.84   34.28   1
   2  13   0    0.47    1.36   1
  -2 -13   0    0.69    1.48   1
  -2 -13   0   -2.96    2.02   4
  -2 -13   0    5.58    4.00   7
  -3 -13   0    5.16    2.56   4
  -3 -13   0    3.13    1.31   1
  -3 -13   0    6.79    4.12   7
  -4 -13   0   44.61    6.85   7
  -4 -13   0   54.47    4.57   4
  -4 -13   0   47.40    4.60   1
   4  13   0   55.91    6.74   1
   5  13   0   50.86    4.47   1
  -5 -13   0   31.44    6.11   7
  -5 -13   0   41.60    5.18   4
  -6 -13   0    8.98    2.28   1
  -6 -13   0    6.50    1.65   4
  -6 -13   0   11.01    3.47   7
  -7 -13   0   -1.61    2.53   7
  -7 -13   0   -1.37    1.40   1
   7  13   0   -2.37    1.40   2
  -8 -13   0    5.57    3.66   7
  -8 -13   0    3.10    2.32   1
   8  13   0    2.15    1.46   2
  -9 -13   0    3.67    2.75   7
  -9 -13   0   -0.70    2.40   1
 -10 -13   0    4.10    2.92   7
 -10 -13   0    7.11    2.88   1
   4 -14   0    2.23    2.56   4
   3 -14   0   -1.26    1.18   1
   2 -14   0   29.29    4.06   4
   2 -14   0   39.42    5.41   1
   1 -14   0   55.77    5.45   1
   1 -14   0   54.19    5.50   4
   0 -14   0   27.14    3.48   4
   0 -14   0   25.59    3.40   1
  -1 -14   0   32.51    4.85   4
  -2 -14   0    5.94    1.64   1
  -2 -14   0    6.82    2.71   4
  -3 -14   0    6.24    3.52   7
  -3 -14   0   -1.96    2.25   4
  -3 -14   0   -0.14    1.53   1
  -4 -14   0   -0.67    1.28   4
  -4 -14   0   -0.70    2.31   7
  -4 -14   0   -0.76    1.39   1
  -5 -14   0   19.72    3.19   1
  -5 -14   0   24.63    5.95   7
  -5 -14   0   20.76    3.41   4
  -6 -14   0   30.16    4.07   4
  -6 -14   0   24.13    4.40   7
  -7 -14   0   28.06    6.02   7
  -7 -14   0   25.43    3.66   1
  -8 -14   0   -0.35    3.44   7
  -9 -14   0    2.42    1.72   1
  -9 -14   0    5.74    3.51   7
   3 -15   0   10.47    2.50   1
   2 -15   0    6.89    1.67   1
   2 -15   0    8.81    3.94   4
   1 -15   0   80.05    8.71   4
   1 -15   0   74.04    8.37   1
   0 -15   0   27.81    5.28   4
   0 -15   0   25.29    3.01   1
  -1 -15   0   28.80    3.30   1
  -1 -15   0   23.77    4.31   4
  -2 -15   0   22.46    3.17   4
  -2 -15   0   18.06    2.80   1
  -3 -15   0    8.86    1.86   1
  -3 -15   0    6.80    2.14   4
  -4 -15   0   56.78    5.88   4
  -4 -15   0   47.17    6.00   1
  -4 -15   0   58.42    7.17   7
  -5 -15   0    3.12    2.28   4
  -5 -15   0    3.51    1.89   1
  -5 -15   0    2.25    3.94   7
  -6 -15   0    6.14    2.98   7
  -6 -15   0    7.22    2.17   1
  -7 -15   0   -2.04    2.56   7
  -7 -15   0   -1.76    1.28   1
  -8 -15   0   19.15    3.53   1
   1 -16   0    8.70    2.73   4
  -1 -16   0    6.03    1.71   1
  -1 -16   0   11.43    3.84   4
  -2 -16   0    0.37    1.68   4
  -2 -16   0    0.51    1.43   1
  -3 -16   0    2.91    2.34   4
  -3 -16   0    4.42    1.66   1
  -4 -16   0   30.43    3.19   1
  -4 -16   0   19.65    4.34   4
  -4 -16   0   23.80    5.59   7
  -5 -16   0    6.72    1.89   4
  -5 -16   0    4.22    2.78   7
  -5 -16   0    9.12    2.10   1
  -6 -16   0   12.14    2.04   1
  -6 -16   1   48.26    5.43   1
  -6 -16   1   48.09    6.82   7
  -5 -16   1    3.80    2.82   7
  -5 -16   1    5.55    2.32   4
  -4 -16   1    8.42    2.48   4
  -4 -16   1    8.37    3.97   7
  -3 -16   1    2.83    2.65   4
  -3 -16   1    4.44    1.48   1
  -2 -16   1   29.48    3.75   1
  -2 -16   1   29.26    5.12   4
  -1 -16   1    2.32    2.15   4
   0 -16   1   27.05    5.13   4
   0 -16   1   32.29    4.22   1
   1 -16   1   14.77    3.43   4
   1 -16   1   14.00    2.93   1
  -8 -15   1   -0.59    2.81   7
  -8 -15   1    0.74    1.96   1
  -7 -15   1   22.72    5.44   7
  -6 -15   1   27.07    3.68   1
  -6 -15   1   19.90    4.27   7
  -5 -15   1    3.13    1.33   1
  -5 -15   1    1.13    1.47   4
  -5 -15   1    4.72    3.65   7
  -4 -15   1    2.72    1.15   1
  -4 -15   1    3.55    2.90   7
  -3 -15   1   -1.27    1.40   1
  -3 -15   1   -0.80    2.19   4
  -3 -15   1   -2.07    3.05   7
  -2 -15   1   47.63    5.92   4
  -2 -15   1   50.57    5.41   1
  -1 -15   1    5.70    1.93   1
   0 -15   1   11.96    3.42   4
   1 -15   1   12.01    2.49   1
   2 -15   1   24.01    3.14   1
   2 -15   1   16.27    4.20   4
   3 -15   1    4.17    2.90   4
  -9 -14   1   12.62    3.62   1
  -8 -14   1   22.98    3.26   1
  -8 -14   1   30.30    4.65   7
   8  14  -1   25.30    5.47   2
  -7 -14   1   26.35    3.60   1
  -7 -14   1   30.23    6.06   7
  -6 -14   1    5.85    4.07   7
  -6 -14   1    1.22    1.96   4
  -5 -14   1   -0.76    2.05   4
  -5 -14   1    0.95    2.23   7
  -5 -14   1   -0.25    1.31   1
  -4 -14   1    5.82    2.08   4
  -4 -14   1    4.32    1.78   1
  -3 -14   1  129.22   10.13   1
  -3 -14   1  119.40   13.84   7
  -3 -14   1  110.23    9.98   4
  -2 -14   1    9.59    2.01   1
  -2 -14   1   11.22    3.60   4
  -1 -14   1   35.05    3.71   1
  -1 -14   1   30.84    4.61   4
   0 -14   1    8.49    2.34   1
   0 -14   1   12.84    3.80   4
   1 -14   1    6.87    2.04   1
  -1  14  -1    4.21    1.23   6
   1 -14   1   10.09    3.92   4
   2 -14   1   21.62    3.32   1
   2 -14   1   16.93    4.62   4
   3 -14   1   -0.66    1.76   1
   3 -14   1   -2.24    2.08   4
   4 -14   1   -1.05    1.32   1
   4 -14   1    0.27    2.20   4
 -10 -13   1    8.89    2.44   1
 -10 -13   1    0.98    4.19   7
   9  13  -1    6.44    1.77   2
  -9 -13   1    3.27    3.80   7
  -8 -13   1    4.27    2.98   7
  -8 -13   1    1.38    2.14   1
   7  13  -1   -2.45    1.45   2
  -6 -13   1   -2.38    3.57   7
  -6 -13   1    1.76    1.78   1
  -5 -13   1   53.89    5.62   4
  -5 -13   1   54.56    7.23   7
  -4 -13   1   21.02    2.68   1
  -4 -13   1   18.55    2.44   4
   3  13  -1    6.15    1.81   1
  -3 -13   1    3.28    2.04   4
  -3 -13   1    0.58    3.61   7
  -2 -13   1    7.85    1.65   1
  -2 -13   1    9.74    3.55   7
   2  13  -1   12.22    1.89   1
  -2 -13   1    8.88    2.52   4
  -1 -13   1    2.49    2.04   4
   0 -13   1  153.44   12.64   4
   0 -13   1  113.96   14.13   1
   0  13  -1  123.85    9.82   6
   1 -13   1   14.58    2.40   1
  -1  13  -1   16.00    2.34   6
   2 -13   1   -1.13    3.19   4
   2 -13   1    0.20    1.61   1
  -3  13  -1    0.90    1.06   6
   3 -13   1   -3.00    2.12   4
   3 -13   1    1.24    2.12   1
   4 -13   1    3.83    2.56   4
   4 -13   1    1.82    1.84   1
   5 -13   1   -2.47    2.15   4
   5 -13   1   -0.05    1.30   1
   6 -13   1   48.59    5.31   1
 -11 -12   1   -1.98    1.92   1
 -10 -12   1    4.54    1.98   1
 -10 -12   1    6.31    4.22   7
  -9 -12   1    1.46    3.88   7
   9  12  -1   -0.60    1.24   2
  -9 -12   1    1.72    2.00   1
  -8 -12   1    3.88    2.42   1
  -8 -12   1    7.27    3.01   7
   8  12  -1    3.30    1.72   2
  -7 -12   1   27.24    3.23   1
  -7 -12   1   22.88    5.33   7
   7  12  -1   24.80    3.65   2
  -6 -12   1  100.88   10.11   7
  -6 -12   1  117.38    7.89   1
  -6 -12   1  108.13    9.94   4
   6  12  -1  116.34    9.10   2
  -5 -12   1   35.58    6.22   7
   5  12  -1   39.91    4.27   1
  -5 -12   1   34.66    4.74   1
  -4 -12   1   18.02    3.28   4
  -4 -12   1   26.31    4.55   7
   4  12  -1   18.32    2.34   5
   4  12  -1   21.89    3.94   1
  -3 -12   1   12.44    2.85   7
  -3 -12   1   10.18    1.66   1
   3  12  -1    9.54    1.20   5
  -3 -12   1    6.03    2.40   4
   3  12  -1   12.44    2.19   1
   2  12  -1   49.84    4.19   1
  -2 -12   1   42.01    4.53   7
  -2 -12   1   44.55    4.52   4
  -2 -12   1   45.50    4.03   1
   2  12  -1   38.06    3.61   5
   1  12  -1   21.46    3.78   1
  -1 -12   1   15.86    2.21   1
  -1 -12   1   15.33    4.31   4
   0  12  -1   45.35    4.34   1
   0 -12   1   37.34    4.43   1
   0  12  -1   39.93    3.88   6
   0 -12   1   49.09    5.88   4
  -1  12  -1    1.17    1.26   1
   1 -12   1   -0.03    0.91   1
   1 -12   1   -1.72    1.99   4
  -1  12  -1   -0.56    1.13   6
   2 -12   1    4.05    1.28   5
   2 -12   1    3.31    2.71   4
  -2  12  -1    3.05    1.57   6
   2 -12   1    3.72    1.62   1
   3 -12   1    0.19    1.04   5
   3 -12   1    4.88    2.39   4
  -3  12  -1    1.17    1.23   1
   4 -12   1    3.08    1.36   1
   4 -12   1    3.01    3.58   4
   5 -12   1   -0.09    1.18   5
   5 -12   1   -2.78    2.20   4
   6 -12   1    2.61    2.47   4
   6 -12   1   -2.40    1.38   1
   7 -12   1    2.99    2.23   1
 -11 -11   1   -3.12    2.21   7
 -11 -11   1    0.31    1.77   1
 -10 -11   1   60.10    6.57   1
 -10 -11   1   48.50    6.40   7
  -9 -11   1   19.42    2.72   1
   9  11  -1   16.09    5.27   2
  -9 -11   1   30.35    5.84   7
   9  11  -1   24.75    3.83   1
   8  11  -1    4.86    2.70   2
  -8 -11   1    7.06    3.13   7
   8  11  -1    4.62    1.61   1
  -7 -11   1    3.81    3.26   7
   7  11  -1    2.30    1.39   2
  -7 -11   1    2.03    1.22   1
   7  11  -1    4.31    1.99   1
   6  11  -1    7.06    2.64   2
  -6 -11   1    7.25    1.58   4
  -6 -11   1    7.13    3.26   7
  -5 -11   1   19.53    3.43   7
  -5 -11   1   13.43    2.36   1
   5  11  -1   12.51    2.34   1
  -5 -11   1   18.71    2.43   4
   5  11  -1   15.49    2.15   2
  -4 -11   1    6.35    1.81   1
   4  11  -1    9.16    1.95   1
  -4 -11   1    7.00    2.33   7
  -4 -11   1    6.77    1.28   1
   4  11  -1    7.55    1.16   5
   4  11  -1    9.61    2.34   2
  -3 -11   1   20.88    2.98   4
   3  11  -1   13.93    2.30   1
  -3 -11   1   20.27    2.77   1
  -3 -11   1   16.94    2.10   1
  -3 -11   1   17.03    2.96   7
   3  11  -1   16.48    2.05   5
  -2 -11   1    4.84    1.73   4
  -2 -11   1    6.85    1.68   1
   2  11  -1    4.57    1.05   5
   2  11  -1    3.91    1.10   1
  -2 -11   1    7.38    3.14   7
  -1 -11   1   31.14    3.86   4
  -1 -11   1   25.11    2.34   1
  -1 -11   1   27.30    2.68   1
   1  11  -1   26.64    2.61   1
   0 -11   1    3.29    1.72   4
   0  11  -1    2.12    1.43   6
   0  11  -1    4.16    1.25   1
   0 -11   1    2.16    1.48   1
   1 -11   1   49.03    4.79   5
   1 -11   1   51.89    3.88   1
  -1  11  -1   46.87    4.33   1
   1 -11   1   47.42    5.22   1
   2 -11   1   29.14    3.56   4
   2 -11   1   30.65    2.85   5
   2 -11   1   25.26    2.73   1
  -2  11  -1   31.98    3.29   1
   3 -11   1   49.75    4.98   4
   3 -11   1   42.49    4.49   5
  -3  11  -1   48.58    5.66   1
   3 -11   1   41.44    4.75   1
   4 -11   1   21.86    3.41   4
   4 -11   1   19.34    3.04   1
   4 -11   1   25.45    3.07   5
  -4  11  -1   15.18    2.47   1
   5 -11   1    7.73    1.70   5
   5 -11   1   10.74    2.65   4
   5 -11   1    9.32    3.12   1
  -5  11  -1    5.48    1.79   1
   6 -11   1    1.68    2.22   4
   6 -11   1    6.67    2.32   1
   6 -11   1    4.99    1.72   5
   7 -11   1    6.79    2.21   1
   7 -11   1   12.58    3.12   5
  11  10  -1    1.82    1.69   1
 -11 -10   1    4.65    2.34   1
 -11 -10   1   10.12    3.61   7
 -10 -10   1   -4.65    2.95   7
  10  10  -1   -0.83    1.48   1
  -9 -10   1   21.11    3.72   1
   9  10  -1   14.32    2.70   1
  -8 -10   1    5.94    2.40   7
   7  10  -1   13.98    3.69   2
   7  10  -1   10.49    2.32   1
  -7 -10   1   13.78    4.17   7
  -6 -10   1    6.93    4.30   7
  -6 -10   1    8.56    1.76   4
   6  10  -1   10.79    2.30   1
  -6 -10   1    6.22    1.95   1
  -6 -10   1    6.47    1.85   1
   6  10  -1   15.15    4.24   2
  -5 -10   1  232.30   17.61   7
  -5 -10   1  201.93   19.99   1
  -5 -10   1  225.32   17.10   1
  -5 -10   1  220.63   21.02   4
   5  10  -1  189.09   64.69   2
   4  10  -1   15.60    2.71   1
   4  10  -1   16.12    1.84   5
  -4 -10   1   14.29    2.31   4
   4  10  -1   16.45    2.21   2
  -4 -10   1   11.59    1.93   1
  -4 -10   1   15.33    2.35   1
  -4 -10   1   13.09    3.05   7
   3  10  -1   45.98    3.81   2
  -3 -10   1   53.90    5.94   7
  -3 -10   1   50.32    4.10   1
  -3 -10   1   36.45    4.50   4
   3  10  -1   50.68    4.59   1
   3  10  -1   41.76    3.29   5
  -2 -10   1   55.87    3.76   1
  -2 -10   1   48.55    4.21   1
   2  10  -1   40.84    4.15   1
  -2 -10   1   44.29    6.40   7
   2  10  -1   48.62    3.56   5
  -2 -10   1   48.95    4.88   4
   1  10  -1    1.31    1.72   6
  -1 -10   1   -0.41    1.74   7
  -1 -10   1    1.09    1.01   1
   1  10  -1   -0.46    1.09   1
  -1 -10   1   -0.03    0.54   1
   1  10  -1   -0.10    0.67   5
  -1 -10   1   -0.34    1.49   4
   0 -10   1   23.16    4.01   4
   0 -10   1   33.47    2.90   1
   0  10  -1   30.25    2.58   6
   0  10  -1   28.11    3.05   1
   1 -10   1   23.24    2.83   4
   1 -10   1   18.31    2.25   1
  -1  10  -1   14.88    2.62   6
  -1  10  -1   19.37    2.58   1
   1 -10   1   14.78    2.19   1
   1 -10   1   22.99    2.23   5
  -2  10  -1  153.80   11.17   1
   2 -10   1  155.53   10.72   5
   2 -10   1  150.02   15.72   4
   2 -10   1  158.64   11.45   1
   2 -10   1  143.00   12.65   1
   3 -10   1   11.28    1.71   1
   3 -10   1    8.20    1.69   1
   3 -10   1   12.37    4.03   4
   3 -10   1   13.18    1.79   5
  -3  10  -1    8.66    1.50   1
   4 -10   1   77.02    6.89   1
   4 -10   1   79.92    6.81   5
  -4  10  -1   85.95    7.57   1
   5 -10   1   26.32    3.10   1
  -5  10  -1   32.48    3.00   1
   5 -10   1   24.75    2.67   5
   5 -10   1   28.11    4.33   4
   6 -10   1   23.27    4.43   4
   6 -10   1   28.69    3.98   5
  -6  10  -1   32.79    4.31   1
   7 -10   1    4.41    2.76   4
   7 -10   1    7.84    1.62   5
   7 -10   1    5.11    2.34   1
   8 -10   1   11.22    2.42   1
   8 -10   1    6.84    2.67   4
  12   9  -1   12.48    2.70   1
 -12  -9   1    7.44    2.45   1
  11   9  -1    2.61    1.79   1
 -11  -9   1    0.19    2.80   1
 -10  -9   1   78.22    7.32   1
  10   9  -1   89.09    6.94   1
  -9  -9   1    3.33    2.48   7
  -8  -9   1   69.33    8.41   7
   8   9  -1   57.35    5.64   1
  -7  -9   1  450.51   32.91   1
   7   9  -1  473.62   40.16   1
  -7  -9   1  423.34   34.12   7
  -6  -9   1  333.11   24.43   4
   6   9  -1  372.84   23.55   1
  -6  -9   1  336.24   28.90   1
  -6  -9   1  289.43   27.54   7
   5   9  -1  139.45   12.27   1
  -5  -9   1  147.64   12.16   7
   5   9  -1  105.23   28.69   2
  -5  -9   1  141.79   12.26   4
  -5  -9   1  141.76    9.15   1
  -4  -9   1    1.93    1.00   1
  -4  -9   1   -0.96    1.10   4
   4   9  -1    3.15    1.30   2
  -4  -9   1    3.76    3.00   7
   4   9  -1   -0.77    1.95   1
   3   9  -1    6.59    1.44   1
  -3  -9   1    8.92    1.16   1
  -3  -9   1    8.85    1.87   1
   3   9  -1    6.82    1.26   5
  -3  -9   1    5.68    2.53   7
   3   9  -1    7.53    1.46   2
  -2  -9   1    6.79    2.24   7
   2   9  -1    3.78    1.05   1
  -2  -9   1    2.96    0.94   1
  -2  -9   1    6.44    1.19   1
   2   9  -1    5.01    0.79   5
   1   9  -1   16.84    1.81   5
  -1  -9   1   15.67    2.81   7
  -1  -9   1   18.46    1.91   1
  -1  -9   1   16.15    2.85   4
   1   9  -1   16.45    2.49   6
   1   9  -1   14.57    1.84   1
   0  -9   1    7.62    1.08   5
   0   9  -1    7.47    1.71   6
   0  -9   1    7.70    1.29   1
   1  -9   1    0.43    0.83   5
   1  -9   1   -2.65    2.18   4
  -1   9  -1    2.06    1.06   1
   1  -9   1    0.38    1.28   1
   2  -9   1    2.36    1.58   1
  -3   9  -1    9.55    1.89   1
   3  -9   1    9.45    1.52   5
   3  -9   1    7.27    1.80   1
   3  -9   1    7.07    2.04   4
   3  -9   1    7.43    1.50   1
   4  -9   1    0.89    1.06   1
   4  -9   1    0.39    1.80   4
   4  -9   1   -0.43    1.08   1
  -5   9  -1    0.74    1.03   1
   5  -9   1    0.04    1.85   4
  -6   9  -1   16.63    2.56   1
   6  -9   1   16.90    3.42   1
   6  -9   1   14.24    2.42   5
  -7   9  -1   10.70    2.03   1
   7  -9   1    8.44    2.15   1
   7  -9   1   10.37    3.25   4
  -8   9  -1    5.81    2.16   1
   8  -9   1    9.12    2.77   4
   8  -9   1   11.67    2.41   1
   9  -9   1   10.70    2.77   4
   9  -9   1   16.68    3.89   1
 -12  -8   1    2.88    2.26   1
  12   8  -1    4.63    2.50   1
  11   8  -1    1.16    1.82   1
 -11  -8   1    1.01    2.27   1
 -10  -8   1    6.64    2.65   1
  10   8  -1    6.99    2.07   1
 -10  -8   1    6.28    1.71   3
   9   8  -1    7.51    2.10   1
   8   8  -1    4.82    2.82   1
   7   8  -1  153.82   14.33   3
  -7  -8   1  165.68   15.83   1
  -7  -8   1  151.00   13.47   7
   7   8  -1  173.21   12.50   1
  -6  -8   1    1.19    1.08   1
  -6  -8   1   -0.44    3.10   7
   6   8  -1    3.36    1.28   3
  -5  -8   1   24.89    3.82   7
   5   8  -1   27.60    2.66   3
  -5  -8   1   27.91    2.78   1
  -5  -8   1   29.41    3.27   1
  -5  -8   1   27.42    2.49   4
  -4  -8   1   50.48    4.27   1
  -4  -8   1   40.24    4.57   6
   4   8  -1   41.02   10.52   2
  -4  -8   1   46.74    3.67   1
   4   8  -1   62.65   23.67   1
  -4  -8   1   46.41    4.92   7
  -4  -8   1   42.17    3.71   4
   3   8  -1   21.79    2.47   5
   3   8  -1   17.13    1.81   1
  -3  -8   1   21.91    3.16   7
  -3  -8   1   23.42    2.04   1
  -3  -8   1   17.77    2.23   1
   3   8  -1   16.97    5.30   1
   3   8  -1   24.08    2.57   2
   3   8  -1   22.16    2.46   3
  -3  -8   1   22.50    3.13   4
   2   8  -1    3.24    1.52   3
  -2  -8   1    2.72    1.18   1
  -2  -8   1    1.58    0.68   1
   2   8  -1   -1.19    0.88   2
  -2  -8   1   -2.02    1.76   4
   2   8  -1   -0.59    0.71   5
  -2  -8   1   -3.06    2.45   7
   2   8  -1   -0.65    1.42   7
   1   8  -1  108.83    7.95   5
   1   8  -1  136.69   10.16   1
   1   8  -1  137.84   10.13   7
  -1  -8   1  137.78    8.62   1
  -1  -8   1  134.80    9.66   4
   1   8  -1  129.87    8.46   1
  -1  -8   1  132.38    9.81   7
  -1  -8   1  130.20    9.79   1
   1   8  -1  115.66    8.95   6
   0   8  -1  452.72   43.78   1
   0  -8   1  424.31   28.34   5
   0   8  -1  420.40   27.68   6
   0  -8   1  446.24   30.09   1
   0   8  -1  434.59   28.87   1
   0   8  -1  416.38   32.65   7
   0  -8   1  476.51   40.21   4
   0  -8   1  481.57   33.43   1
   1  -8   1  102.95    7.27   4
  -1   8  -1   90.66    9.64   1
   1  -8   1   98.53    6.66   1
   1  -8   1  106.01    6.72   1
   1  -8   1   92.67    6.25   5
   2  -8   1   43.14    3.08   1
  -2   8  -1   44.12    4.04   1
   2  -8   1   45.12    4.37   4
   2  -8   1   39.69    3.02   5
   3  -8   1    4.45    1.18   1
   3  -8   1    3.51    1.47   5
   3  -8   1    3.83    1.62   4
  -3   8  -1    3.33    0.95   1
   3  -8   1    2.83    1.43   1
   4  -8   1    2.66    1.62   1
   4  -8   1    3.19    1.81   4
   4  -8   1    3.55    1.15   1
   5  -8   1   82.40    8.31   1
   5  -8   1   90.44    7.53   1
   5  -8   1  101.61    7.57   5
  -5   8  -1   98.76    6.87   1
   5  -8   1  110.26    9.13   4
   6  -8   1  106.73    8.63   4
  -6   8  -1  112.86    8.75   1
   6  -8   1  131.51    9.22   1
   7  -8   1   46.19    4.61   1
  -7   8  -1   55.93    5.47   1
   8  -8   1   15.03    3.60   4
  -8   8  -1   18.46    2.87   1
   8  -8   1   17.99    2.79   1
   9  -8   1   33.63    4.94   4
  -9   8  -1   33.59    5.33   1
  11   7  -1   26.83    3.82   1
 -10  -7   1   10.27    3.42   1
  10   7  -1   15.88    2.83   1
 -10  -7   1   17.49    2.08   3
  -9  -7   1   34.64    3.44   3
   9   7  -1   27.02    4.96   1
   8   7  -1   43.76    3.90   1
  -8  -7   1   46.68    4.44   3
  -7  -7   1   40.88    3.58   3
   7   7  -1   42.69    3.46   1
   6   7  -1  113.53    7.52   3
  -6  -7   1  105.20    7.25   3
  -6  -7   1  116.89   10.13   1
   6   7  -1  117.76    8.98   1
  -6  -7   1  112.54    8.79   7
  -5  -7   1   29.11    2.28   4
  -5  -7   1   24.74    2.42   1
   5   7  -1   22.30    2.10   3
  -5  -7   1   25.34    3.12   1
  -5  -7   1   28.35    3.93   7
   5   7  -1   23.02    2.54   1
   4   7  -1  386.46   24.35   1
   4   7  -1  373.81   26.30   3
   4   7  -1  366.53   29.35   1
  -4  -7   1  373.37   24.58   1
  -4  -7   1  361.41   25.52   1
  -4  -7   1  333.68   29.40   6
  -4  -7   1  351.94   31.04   7
  -4  -7   1  349.16   26.47   4
   3   7  -1   -0.81    0.48   1
  -3  -7   1   -0.68    2.45   7
   3   7  -1    1.59    1.72   1
  -3  -7   1   -0.70    0.82   1
  -3  -7   1   -0.70    0.96   1
  -3  -7   1    1.34    1.32   6
   3   7  -1    1.55    1.12   3
   3   7  -1    0.15    1.48   2
  -2  -7   1   29.39    4.14   7
   2   7  -1   30.74    2.60   1
   2   7  -1   28.01    4.18   7
   2   7  -1   36.93    3.01   1
  -2  -7   1   28.43    2.83   1
  -2  -7   1   35.39    2.88   1
   2   7  -1   32.43    2.65   5
  -2  -7   1   32.64    3.88   4
  -1  -7   1  307.30   25.35   4
   1   7  -1  247.38   17.47   1
   1   7  -1  292.49   20.80   7
  -1  -7   1  273.87   18.90   1
  -1  -7   1  260.51   18.94   7
  -1  -7   1  263.16   17.46   1
   1   7  -1  285.77   19.62   1
   1   7  -1  280.59   17.25   5
   1   7  -1  283.03   18.33   6
   0   7  -1   77.15    5.17   1
   0   7  -1   71.14    5.58   5
   0  -7   1   85.63    6.84   4
   0   7  -1   77.49    5.31   6
   0  -7   1   70.25    5.05   1
   0  -7   1   77.97    5.54   5
   0   7  -1   77.76    7.14   7
   0  -7   1   79.71    5.16   1
   0   7  -1   70.58    5.63   1
   1  -7   1   99.07    8.31   1
  -1   7  -1  120.65    9.65   7
   1  -7   1  132.18    7.50   5
   1  -7   1  147.29   18.36   4
  -1   7  -1  113.47    8.27   1
  -1   7  -1  119.29   16.60   1
   1  -7   1  112.37    9.31   2
   1  -7   1  134.16    8.54   1
   2  -7   1   14.18    1.75   1
  -2   7  -1   14.07    1.79   1
   2  -7   1   13.69    1.42   5
   2  -7   1   13.01    1.62   1
   2  -7   1   18.14    2.69   4
   3  -7   1   68.24    4.68   1
   3  -7   1   67.71    7.10   1
   3  -7   1   74.34    5.49   5
   3  -7   1   65.12    7.29   4
  -3   7  -1   54.38    4.61   1
  -4   7  -1   -0.39    1.00   1
   4  -7   1    1.40    0.87   5
   4  -7   1    1.02    1.03   1
   4  -7   1    0.81    1.68   4
   4  -7   1    2.07    1.78   1
   5  -7   1  102.08   18.13   1
   5  -7   1  109.99    8.35   1
   5  -7   1  110.60    8.78   4
  -5   7  -1   99.51    9.06   1
   6  -7   1   -1.16    1.54   4
   6  -7   1   -0.50    1.28   1
  -7   7  -1   30.47    3.32   1
   7  -7   1   37.16    3.91   1
   7  -7   1   36.66    4.62   4
   8  -7   1    2.16    1.72   4
   8  -7   1    4.80    2.77   1
   9  -7   1   61.84    6.93   4
   9  -7   1   49.59    5.75   1
  -9   7  -1   47.09    8.25   1
  10  -7   1   12.50    2.87   4
 -10   7  -1   14.64    3.75   1
  12   6  -1    7.40    2.46   1
  11   6  -1   22.89    3.44   1
 -11  -6   1   20.49    3.89   1
  10   6  -1    1.34    1.53   1
 -10  -6   1    0.37    0.72   3
  -9  -6   1   10.18    1.98   3
  -8  -6   1   19.83    2.30   3
   8   6  -1   19.74    2.97   1
  -7  -6   1    2.14    1.41   3
  -7  -6   1    0.89    0.98   1
   7   6  -1    1.40    1.17   1
  -6  -6   1   10.90    1.64   3
   6   6  -1   16.35    2.40   1
  -6  -6   1   10.07    1.96   1
  -6  -6   1   14.09    1.66   1
   5   6  -1    3.85    1.19   1
  -5  -6   1    2.90    2.52   1
   5   6  -1    3.39    0.79   3
  -5  -6   1    6.29    2.04   3
  -4  -6   1   31.70    3.26   1
   4   6  -1   29.58    2.76   1
   4   6  -1   31.60    2.53   3
  -4  -6   1   32.15    2.57   1
  -4  -6   1   35.24    3.60   4
  -3  -6   1  162.37   12.89   4
   3   6  -1  167.06   12.02   1
   3   6  -1  174.84   11.41   1
  -3  -6   1  154.63   13.18   1
  -3  -6   1  169.14   12.05   7
   3   6  -1  158.20   12.26   3
  -3  -6   1  152.86   11.75   6
  -3  -6   1  166.08   11.36   1
   2   6  -1   48.58    3.90   1
  -2  -6   1   43.89    3.46   1
  -2  -6   1   56.88    8.46   4
  -2  -6   1   51.27    4.24   6
  -2  -6   1   58.20    3.80   1
   2   6  -1   46.95    3.99   7
   2   6  -1   58.29   10.55   2
   2   6  -1   53.76    3.78   3
   2   6  -1   49.21    3.64   5
  -2  -6   1   53.27    5.15   7
   2   6  -1   58.16   19.74   1
  -1  -6   1   58.30    5.05   7
   1   6  -1   63.07    5.15   6
   1   6  -1   61.60    4.44   1
   1   6  -1   61.99    4.31   5
  -1  -6   1   59.63    3.85   1
  -1  -6   1   62.43    4.23   1
   1   6  -1   59.84    4.08   1
   1   6  -1   73.64    4.84   2
   1   6  -1   53.61    5.17   7
  -1  -6   1   78.03    9.96   4
   0   6  -1  554.75   36.56   1
   0   6  -1  509.81   37.22   1
   0  -6   1  527.52   35.94   1
   0   6  -1  550.50   42.02   7
   0  -6   1  707.41  138.98   4
   0  -6   1  566.92   39.17   7
   0  -6   1  574.59   34.17   5
   0  -6   1  496.28   36.90   1
   0   6  -1  549.66   39.19   5
   1  -6   1  192.11   11.80   1
  -1   6  -1  159.88   12.69   1
  -1   6  -1  153.87   19.35   1
   1  -6   1  197.98   44.73   4
   1  -6   1  179.79   12.20   5
   1  -6   1  187.02   11.71   1
  -1   6  -1  186.47   14.03   7
   1  -6   1  163.31   14.39   2
   2  -6   1   19.98    1.84   1
   2  -6   1   26.26    3.93   4
  -2   6  -1   18.11    1.71   1
   2  -6   1   23.11    2.12   1
  -2   6  -1   18.95    2.19   1
   2  -6   1   19.95    1.94   5
   2  -6   1   19.62    2.22   2
   3  -6   1  206.62   14.62   4
  -3   6  -1  172.28   13.20   1
   3  -6   1  198.83   13.62   1
   3  -6   1  203.82   15.30   1
  -4   6  -1    9.79    2.20   1
   4  -6   1    7.62    2.69   4
   4  -6   1    8.98    1.51   1
  -5   6  -1  119.03    8.23   1
   5  -6   1  115.78    8.79   4
   5  -6   1   96.93    8.52   1
   5  -6   1   96.22   21.21   1
  -6   6  -1    0.14    1.11   1
   6  -6   1   -2.36    1.42   1
   6  -6   1   -0.03    2.22   4
   7  -6   1  118.43   10.69   4
  -7   6  -1  133.84    9.83   1
   7  -6   1  135.75   10.19   1
   8  -6   1   18.08    3.09   4
  -8   6  -1   12.47    2.29   1
   9  -6   1    4.59    2.26   4
   9  -6   1   -0.41    1.64   1
  -9   6  -1   -0.30    2.12   1
 -10   6  -1   35.02    6.52   1
  10  -6   1   25.42    3.81   4
  10  -6   1   21.68    4.40   1
  11  -6   1    7.76    2.59   4
  11  -6   1    8.33    2.85   1
  13   5  -1    3.05    3.03   1
 -13  -5   1   -2.10    1.84   1
  12   5  -1   15.21    3.98   1
 -12  -5   1   12.43    3.29   1
  11   5  -1   15.42    3.27   1
 -11  -5   1   18.78    2.17   3
 -10  -5   1    6.05    1.18   3
 -10  -5   1    5.13    1.91   1
  -9  -5   1    0.39    0.74   3
   9   5  -1   -0.54    1.41   1
  -9  -5   1    1.92    1.33   1
   8   5  -1   25.85    3.76   1
  -8  -5   1   29.70    2.98   3
  -8  -5   1   33.53    3.53   1
  -7  -5   1  125.88    9.81   1
  -7  -5   1  125.91    9.50   1
  -7  -5   1  136.53    9.38   3
   7   5  -1  140.99    9.03   1
  -6  -5   1    8.64    1.33   1
  -6  -5   1    9.35    1.40   1
   6   5  -1    9.32    1.84   1
   5   5  -1    2.43    0.78   1
  -5  -5   1    3.47    1.15   1
   5   5  -1    2.64    0.70   3
  -4  -5   1   60.69    4.24   1
  -4  -5   1   61.32    4.35   1
   4   5  -1   59.18    5.16   1
  -4  -5   1   59.78    4.03   3
   4   5  -1   59.29    4.63   1
  -4  -5   1   66.98    4.44   4
   4   5  -1   61.18    4.21   3
  -3  -5   1  789.91   62.11   7
  -3  -5   1  795.58   51.99   1
   3   5  -1  799.03   47.33   1
  -3  -5   1  738.92   59.61   4
  -3  -5   1  765.59   56.94   6
   3   5  -1  786.84   57.79   3
  -3  -5   1  806.02   45.99   1
   3   5  -1  650.97   50.74   1
  -2  -5   1   39.21    3.22   6
   2   5  -1   46.19    6.53   2
  -2  -5   1   38.57    2.96   1
  -2  -5   1   45.21    4.21   7
   2   5  -1   38.21    3.76   3
   2   5  -1   47.81   10.99   1
  -2  -5   1   43.69    7.03   4
   2   5  -1   38.08    2.87   1
  -2  -5   1   42.10    3.41   1
   2   5  -1   32.69    3.12   7
  -1  -5   1  114.47    8.26   1
   1   5  -1  124.68    8.32   2
   1   5  -1  121.29    7.95   1
   1   5  -1  124.15    7.65   5
   1   5  -1  113.27    8.22   7
  -1  -5   1  150.03   26.21   4
   1   5  -1  119.67    8.82   1
   1   5  -1  115.86    9.19   6
  -1  -5   1  123.51    9.08   7
   0   5  -1  372.42   26.90   1
   0   5  -1  424.81   32.76   7
   0  -5   1  433.39   27.84   1
   0  -5   1  411.99   26.70   7
   0   5  -1  462.96   29.24   1
   0   5  -1  452.88   29.55   5
   0  -5   1  397.86   27.43   1
   0  -5   1  417.13   26.19   5
   0  -5   1  604.68  123.05   4
  -1   5  -1   37.86    2.53   1
  -1   5  -1   35.68    3.99   1
   1  -5   1   38.02    2.74   1
   1  -5   1   36.75    2.36   1
   1  -5   1   32.71    2.83   5
  -1   5  -1   31.62    3.58   7
   1  -5   1   33.04    5.03   4
  -2   5  -1   -0.29    0.48   1
   2  -5   1    0.81    0.57   5
   2  -5   1   -0.93    1.14   4
   2  -5   1    1.39    0.77   1
  -2   5  -1    1.27    0.94   1
   2  -5   1   -0.02    1.19   1
  -3   5  -1  183.53   13.86   1
  -3   5  -1  206.46   15.28   1
   3  -5   1  204.88   12.99   1
   3  -5   1  192.16   15.48   1
   3  -5   1  195.37   28.03   4
   4  -5   1   30.11    2.72   1
   4  -5   1   24.90    2.67   1
  -5   5  -1   10.18    1.53   1
   5  -5   1   12.57    2.90   4
   5  -5   1    7.57    1.41   1
   5  -5   1   10.13    1.48   1
  -6   5  -1   24.64    3.03   1
   6  -5   1   18.44    2.53   1
   6  -5   1   17.68    2.68   4
  -7   5  -1   34.13    4.71   1
   7  -5   1   41.63    4.10   1
   8  -5   1   84.41    6.63   1
   8  -5   1   74.15    5.93   4
  -8   5  -1   72.13    6.98   1
   9  -5   1   -1.30    1.85   4
   9  -5   1   -0.90    1.55   1
  -9   5  -1    0.18    1.60   1
 -10   5  -1    5.16    1.88   1
 -11   5  -1   11.07    3.09   1
  11  -5   1    5.36    2.68   1
  11  -5   1    7.60    2.09   4
  13   4  -1    1.31    2.49   1
 -13  -4   1    1.22    1.91   1
 -12  -4   1    0.11    2.95   1
  12   4  -1   -0.91    1.83   1
  11   4  -1    4.16    2.51   1
 -11  -4   1    1.56    1.26   3
 -11  -4   1    1.26    1.59   1
 -10  -4   1    2.45    1.15   3
 -10  -4   1    3.85    2.07   1
  -9  -4   1    5.36    1.60   1
  -8  -4   1    0.39    0.94   3
   8   4  -1    1.02    1.72   1
  -7  -4   1    1.39    1.24   1
   7   4  -1    1.17    1.90   1
   6   4  -1    9.39    1.51   1
  -6  -4   1    9.35    1.74   1
  -6  -4   1    8.68    1.32   3
  -6  -4   1    9.97    1.41   1
  -5  -4   1    3.99    0.96   3
   5   4  -1    5.13    1.35   1
  -4  -4   1   32.20    2.69   3
  -4  -4   1   35.32    3.04   1
   4   4  -1   31.01    2.49   1
   4   4  -1   34.72    2.69   3
   4   4  -1   34.76    3.32   1
   3   4  -1   33.52    2.48   1
  -3  -4   1   27.45    2.10   4
  -3  -4   1   25.11    2.26   3
  -3  -4   1   32.18    2.43   1
   3   4  -1   27.77    2.32   1
  -3  -4   1   31.07    2.39   1
   3   4  -1   28.93    2.54   3
  -2  -4   1   57.41    4.33   1
  -2  -4   1   64.97    5.01   7
  -2  -4   1   61.42    3.93   1
  -2  -4   1   53.48    3.80   6
   2   4  -1   55.88    4.17   3
  -2  -4   1   56.43    4.76   4
   2   4  -1   48.87    3.81   1
   1   4  -1   73.78    6.01   1
   1   4  -1   82.82    5.95   5
   1   4  -1   78.80    4.94   1
  -1  -4   1   87.95    5.68   1
  -1  -4   1   81.76    5.30   1
   1   4  -1   97.23   14.68   2
  -1  -4   1   77.87    6.52   7
   1   4  -1   74.95    6.98   7
  -1  -4   1  112.30   19.72   4
   1   4  -1   75.68    5.74   6
   1   4  -1   85.16    5.46   3
   0  -4   1   50.82    3.72   1
   0   4  -1   59.77    4.10   5
   0  -4   1   70.29    8.84   4
   0   4  -1   54.96    4.09   1
   0  -4   1   57.50    3.94   1
   0  -4   1   55.71    4.64   7
   0   4  -1   50.93    4.14   7
   0  -4   1   50.99    3.64   5
   1  -4   1   -1.43    0.86   4
   1  -4   1    0.86    0.81   1
   1  -4   1   -1.14    0.61   1
   1  -4   1    0.86    0.49   5
  -1   4  -1   -0.82    1.16   7
   2  -4   1   10.13    1.28   1
  -2   4  -1    7.31    0.93   1
   2  -4   1    8.06    1.57   4
  -3   4  -1  186.90   14.17   1
   3  -4   1  193.84   12.49   1
  -3   4  -1  192.92   13.35   1
   3  -4   1  186.00   27.10   4
   3  -4   1  193.19   12.38   1
   4  -4   1   -0.96    1.14   4
  -4   4  -1    0.39    0.58   1
  -4   4  -1   -0.50    1.19   1
   4  -4   1    0.90    1.04   1
   4  -4   1   -0.07    0.62   1
   5  -4   1   10.51    1.97   1
   5  -4   1   11.91    2.03   4
   5  -4   1   14.27    1.91   1
   6  -4   1   22.63    2.93   1
   6  -4   1   16.82    2.59   4
   7  -4   1    2.88    2.10   4
   7  -4   1    5.19    2.93   1
  -7   4  -1    7.90    4.20   1
   8  -4   1   10.67    2.23   1
  -8   4  -1   17.29    3.15   1
   8  -4   1   15.13    2.07   4
   9  -4   1   13.05    2.85   1
  -9   4  -1   22.40    3.70   1
   9  -4   1   18.00    3.48   4
  10  -4   1    0.99    1.80   4
  11  -4   1    1.12    2.24   1
 -11   4  -1    1.50    1.86   1
  11  -4   1   -1.81    1.80   4
  13   3  -1   -1.63    3.25   1
 -13  -3   1    5.93    2.32   1
 -12  -3   1    7.01    3.60   1
 -11  -3   1    1.39    1.27   3
 -10  -3   1    1.65    1.27   3
  -9  -3   1    1.69    0.78   3
  -8  -3   1   -1.41    1.08   3
  -8  -3   1   -1.93    1.06   1
   8   3  -1   -0.07    1.33   1
  -7  -3   1   -1.38    1.00   1
  -7  -3   1    0.66    0.76   3
   7   3  -1   -1.30    1.01   1
  -6  -3   1  247.65   17.54   1
   6   3  -1  271.72   15.97   1
  -6  -3   1  245.20   15.71   3
   5   3  -1    0.67    1.03   1
  -5  -3   1   -0.55    0.72   1
  -5  -3   1   -0.32    1.11   1
   4   3  -1   17.49    1.57   1
   4   3  -1   18.84    2.19   1
  -4  -3   1   17.47    1.87   1
  -3  -3   1   55.07    4.59   3
   3   3  -1   61.25    4.33   4
  -3  -3   1   51.90    5.11   1
  -3  -3   1   63.09    4.63   1
   3   3  -1   67.83    4.17   1
   3   3  -1   60.33    3.98   1
   3   3  -1   52.66    3.73   3
   2   3  -1  302.91   49.21   4
  -2  -3   1  276.14   19.62   7
  -2  -3   1  266.54   17.49   3
   2   3  -1  264.83   17.63   3
   2   3  -1  280.65   17.69   1
  -2  -3   1  246.47   16.07   1
  -2  -3   1  264.52   22.85   4
  -2  -3   1  272.75   17.65   1
  -1  -3   1   -2.89    1.04   7
   1   3  -1    0.16    0.96   3
   1   3  -1   -1.54    1.48   7
  -1  -3   1   -2.13    0.58   4
  -1  -3   1   -1.22    0.82   6
  -1  -3   1   -2.23    0.49   1
  -1  -3   1   -1.90    0.54   1
   1   3  -1   -1.48    0.69   1
   1   3  -1   -0.04    1.15   6
   0  -3   1  390.88   24.60   5
   0   3  -1  386.31   26.64   7
   0  -3   1  351.55   27.27   7
   0   3  -1  374.64   27.87   5
   0   3  -1  432.42   25.87   1
   0  -3   1  386.76   29.35   1
   0   3  -1  415.13   24.56   2
   0  -3   1  396.22   26.05   1
  -1   3  -1  339.16   20.30   1
   1  -3   1  329.35   22.51   5
   1  -3   1  279.06   21.97   1
  -1   3  -1  343.68   20.73   1
   1  -3   1  314.09   24.08   4
   1  -3   1  326.46   31.87   1
   2  -3   1  218.56   13.24   1
  -2   3  -1  219.00   14.12   1
   2  -3   1  213.20   16.57   4
  -2   3  -1  225.53   14.20   1
   2  -3   1  220.77   14.41   1
   3  -3   1    7.48    1.45   4
   3  -3   1    5.14    1.08   1
  -3   3  -1    6.62    0.92   1
  -3   3  -1    7.44    1.52   1
   4  -3   1   73.73    6.38   1
  -4   3  -1   93.90    6.96   1
   4  -3   1   85.54    6.25   1
   4  -3   1   88.92    6.84   4
  -4   3  -1   97.65   10.01   1
   5  -3   1   46.91    3.90   1
   5  -3   1   44.91    4.28   4
  -5   3  -1   49.08    4.23   1
   5  -3   1   53.72    4.18   1
   6  -3   1    5.56    1.32   1
   6  -3   1    4.94    2.19   4
   6  -3   1    7.62    2.06   1
  -6   3  -1    4.28    1.32   1
   7  -3   1   63.00    5.62   4
   7  -3   1   69.09    5.45   1
  -7   3  -1   65.99    5.54   1
   8  -3   1    3.37    2.30   1
  -8   3  -1    2.07    1.69   1
   8  -3   1    0.53    1.62   4
  -9   3  -1    0.98    1.39   1
   9  -3   1    0.78    1.45   1
   9  -3   1    0.27    1.17   4
  10  -3   1   11.30    2.27   4
  10  -3   1   13.64    2.60   1
 -10   3  -1   16.74    2.93   1
  11  -3   1   85.40    8.69   4
 -11   3  -1   91.70    8.26   1
 -12   3  -1   17.69    3.72   1
  12  -3   1   16.20    3.48   1
  13   2  -1   21.39    3.89   1
 -11  -2   1   24.68    2.81   3
 -10  -2   1   45.33    4.14   3
   9   2  -1   15.65    1.87   4
   8   2  -1   34.74    5.12   1
   8   2  -1   29.03    2.60   4
  -8  -2   1   34.05    3.21   1
  -7  -2   1   16.83    3.08   1
   7   2  -1   11.50    1.25   4
   7   2  -1   11.59    1.80   1
   6   2  -1    5.01    2.09   4
  -6  -2   1   -0.37    1.63   1
  -6  -2   1   -0.20    1.12   1
   6   2  -1    1.77    1.58   1
  -5  -2   1  487.69   30.09   1
   5   2  -1  372.53   37.25   1
   5   2  -1  480.06   31.37   1
  -5  -2   1  421.06   38.71   1
  -4  -2   1    3.78   13.80   1
  -4  -2   1    3.66    8.75   1
   4   2  -1    1.31    4.43   1
   4   2  -1    1.07    0.78   1
  -4  -2   1    1.18    0.91   3
  -3  -2   1   68.40    4.54   1
   3   2  -1   62.66    4.42   1
  -3  -2   1   59.96    4.93   1
  -3  -2   1   63.94    4.47   3
   3   2  -1   61.16    4.99   4
   3   2  -1   73.06    4.76   1
   2   2  -1   20.83    1.89   3
  -2  -2   1   21.55    2.11   1
   2   2  -1   23.36    1.85   1
   2   2  -1   25.45    1.82   1
   2   2  -1   24.42    1.88   4
  -2  -2   1   23.00    2.09   3
   1   2  -1  449.51   30.87   7
  -1  -2   1  429.79   32.03   3
   1   2  -1  449.71   37.86   4
   1   2  -1  428.02   27.57   3
   1   2  -1  442.96   27.30   1
  -1  -2   1  452.25   29.76   1
  -1  -2   1  402.47   29.21   1
   1   2  -1  467.93   27.75   1
  -1  -2   1  446.11   31.20   7
  -1  -2   1  433.99   31.06   6
  -1  -2   1  431.33   38.99   4
   0  -2   1  362.02   25.02   7
   0   2  -1  387.63   24.03   1
   0  -2   1  372.32   24.53   5
   0   2  -1  363.43   24.69   1
   0   2  -1  374.71   25.09   7
   0   2  -1  362.94   28.30   5
   0  -2   1  365.07   23.71   1
   0   2  -1  427.45   28.19   2
  -1   2  -1    4.62    0.67   1
   1  -2   1    4.42    0.59   1
  -1   2  -1    4.61    0.72   1
   1  -2   1    3.85    0.64   1
   1  -2   1    4.47    0.86   4
  -2   2  -1    7.77    1.02   1
   2  -2   1    9.36    1.26   1
  -2   2  -1    4.88    1.16   1
   2  -2   1    7.59    1.58   4
   2  -2   1    5.61    1.14   1
  -3   2  -1   98.74    6.69   1
   3  -2   1   97.71    7.82   4
  -3   2  -1   92.61    6.34   1
   3  -2   1   79.69    6.92   1
   3  -2   1  108.89    7.22   1
  -4   2  -1   27.56    2.58   1
   4  -2   1   36.18    2.98   1
  -4   2  -1   29.97    2.47   1
   4  -2   1   37.21    2.58   1
   4  -2   1   39.19    2.80   4
  -5   2  -1   -0.64    4.94   1
  -5   2  -1    2.41    0.85   1
   5  -2   1    4.01    2.66   1
   5  -2   1    3.54    1.65   4
   6  -2   1  436.58   28.62   4
   6  -2   1  417.54   38.42   1
  -6   2  -1  368.53   29.77   1
   6  -2   1  420.22   28.62   1
   7  -2   1   73.02    5.43   1
  -7   2  -1   76.34    6.06   1
   7  -2   1   79.88    5.86   4
   8  -2   1   19.76    3.90   1
  -8   2  -1   12.35    2.07   1
   8  -2   1   14.29    2.23   4
   9  -2   1    5.07    1.51   4
   9  -2   1    5.29    2.33   1
  -9   2  -1    2.91    1.87   1
 -10   2  -1  124.02   10.48   1
  10  -2   1  111.45   12.41   4
 -11   2  -1    1.78    1.78   1
  12   1  -1    5.44    2.41   1
  11   1  -1    1.86    1.97   1
 -11  -1   1   -0.77    1.50   1
  10   1  -1    1.63    0.75   4
  10   1  -1    3.18    1.71   1
 -10  -1   1   -0.90    1.39   1
  -9  -1   1    2.32    1.81   1
   9   1  -1    2.54    0.86   4
   8   1  -1   46.44    4.18   4
  -8  -1   1   54.04    4.02   1
   8   1  -1   46.73    4.59   1
   7   1  -1    3.80    1.04   4
   7   1  -1    5.77    1.83   1
  -6  -1   1 1028.25   65.50   1
   6   1  -1  907.41   64.58   4
  -6  -1   1  906.43   55.28   1
   6   1  -1  965.21   59.82   1
  -5  -1   1   -0.12    0.95   1
   5   1  -1    1.30    1.33   1
   5   1  -1    0.33    0.69   1
  -5  -1   1    2.80    0.84   1
  -4  -1   1   53.97    4.07   1
   4   1  -1   46.52    3.50   1
  -4  -1   1   49.53    3.75   1
   4   1  -1   43.07    4.17   1
   3   1  -1    0.93    0.93   1
  -3  -1   1    0.70    0.96   1
   3   1  -1    1.42    0.88   1
  -2  -1   1   59.44    4.13   1
   2   1  -1   59.20    4.43   1
   2   1  -1   67.06    4.38   1
  -2  -1   1   57.62    4.19   1
   1  -1   1  205.73   13.32   1
   1  -1   1  190.75   14.40   1
  -1   1  -1  206.27   14.40   1
  -1   1  -1  195.12   12.60   1
   1  -1   1  192.98   16.14   4
   2  -1   1  525.89   42.57   4
   2  -1   1  557.26   37.15   1
  -2   1  -1  556.77   35.13   1
  -2   1  -1  441.73   35.71   1
   3  -1   1   88.24    6.84   4
   3  -1   1   81.87    5.97   1
   3  -1   1   73.14    5.92   1
  -3   1  -1   67.69    6.29   1
  -3   1  -1   79.88    5.56   1
   4  -1   1  109.78    6.61   1
   4  -1   1   97.44    6.70   1
   4  -1   1  105.63    7.66   4
  -4   1  -1  100.98    6.67   1
  -4   1  -1   98.69    6.38   1
   5  -1   1  109.40    7.01   1
   5  -1   1  113.66    7.76   1
  -5   1  -1   96.97    7.35   1
  -5   1  -1   98.66    6.94   1
   5  -1   1   97.11    7.38   4
   6  -1   1   32.82    4.28   1
   6  -1   1   35.85    3.35   4
   6  -1   1   28.61    7.65   1
  -6   1  -1   43.40   13.13   1
  -7   1  -1   37.03    3.64   1
   7  -1   1   39.26    4.58   1
   7  -1   1   35.04    3.04   4
   8  -1   1  131.29    9.11   4
  -8   1  -1  156.44   10.96   1
   8  -1   1  125.07    9.80   1
   9  -1   1    9.71    2.86   1
  -9   1  -1   11.89    2.14   1
 -10   1  -1   14.40    2.50   1
  10  -1   1   18.14    2.62   4
 -11   1  -1   -1.88    1.55   1
 -12   1  -1    3.63    3.30   1
 -12   0   1   15.47    3.41   1
  12   0  -1   12.56    3.51   1
 -11   0   1   30.33    3.54   1
 -10   0   1    8.54    2.74   1
   9   0  -1   20.44    2.49   4
  -8   0   1   22.28    2.79   1
   8   0  -1   24.42    2.71   1
   8   0  -1   19.95    2.19   4
   7   0  -1   61.48    5.55   1
  -7   0   1   66.61    5.66   1
   7   0  -1   66.18    4.74   4
   6   0  -1  158.05   11.46   1
  -6   0   1  166.88   12.49   1
  -5   0   1   14.29    1.92   1
  -5   0   1   16.68    1.76   1
   5   0  -1   16.31    2.15   1
   4   0  -1    2.43    2.07   1
  -4   0   1    4.77    1.86   1
   4   0  -1    2.37    0.83   1
  -3   0   1  462.05   28.80   1
   3   0  -1  459.69   27.76   1
  -3   0   1  442.75   27.63   1
   3   0  -1  430.23   29.27   1
   2   0  -1 1477.93   99.40   1
  -2   0   1 1484.42   96.41   1
  -2   0   1 1333.93   99.09   1
   2   0  -1 1458.66  103.81   1
   2   0   1  203.53   17.74   4
  -2   0  -1  195.48   17.10   4
   2   0   1  207.30   13.12   1
  -2   0  -1  202.06   13.58   1
   2   0   1  212.72   14.72   1
  -2   0  -1  207.81   13.31   1
   3   0   1   25.09    2.54   4
   3   0   1   26.23    2.10   1
  -3   0  -1   22.94    2.30   1
  -3   0  -1   26.46    1.97   1
  -4   0  -1   46.00    5.97   1
   4   0   1   45.46    3.50   1
  -4   0  -1   41.46    5.67   1
   4   0   1   45.04    3.55   4
   4   0   1   41.46    3.52   1
   5   0   1   88.06    6.21   4
   5   0   1   97.18    6.16   1
   5   0   1   76.01    6.44   1
  -5   0  -1   92.39    6.45   1
   6   0   1   85.25   17.90   1
   6   0   1   71.75    4.89   1
   6   0   1   77.48    5.35   4
  -6   0  -1   92.89   28.33   1
  -7   0  -1    5.48    1.94   1
   7   0   1    2.57    0.93   4
   7   0   1    3.03    1.88   1
   8   0   1   13.30    2.17   1
  -8   0  -1   15.63    2.77   1
   8   0   1   11.39    1.93   4
   9   0   1   18.48    2.08   4
  -9   0  -1   12.43    2.22   1
   9   0   1   13.33    3.13   1
  10   0   1   -0.71    0.89   4
 -10   0  -1   -1.02    1.47   1
 -12   0  -1   -1.03    1.66   1
 -12   1   1    8.83    2.43   1
  12  -1  -1    8.23    3.10   1
 -11   1   1    1.19    1.65   1
  10  -1  -1    3.00    0.98   4
   9  -1  -1   39.04    5.15   1
  -9   1   1   37.05    5.19   1
   9  -1  -1   29.90    3.22   4
   8  -1  -1    3.10    1.73   1
   8  -1  -1    0.46    0.74   4
   7  -1  -1    2.93    1.14   4
   7  -1  -1    0.80    1.23   1
  -7   1   1    1.07    1.10   1
  -6   1   1    2.15    3.13   1
   6  -1  -1    1.78    2.01   1
  -5   1   1  171.04   10.19   1
   5  -1  -1  146.31   10.74   1
  -5   1   1  142.23   10.81   1
   5  -1  -1  152.19    9.29   1
  -4   1   1 1275.98   87.00   1
   4  -1  -1 1289.57   75.21   1
  -4   1   1 1262.75   79.04   1
   4  -1  -1 1312.21   85.79   1
  -3   1   1  224.00   14.23   1
  -3   1   1  220.16   14.07   1
   3  -1  -1  251.59   16.01   1
   3  -1  -1  231.54   14.20   1
   2  -1  -1 4823.33  297.59   1
  -2   1   1 5003.12  332.82   1
   2  -1  -1 5083.89  334.70   1
  -2   1   1 5374.98  322.87   1
   1  -1  -1 1836.88  122.51   1
  -1   1   1 1823.13  124.70   1
   1  -1  -1 1712.06  107.14   1
  -1   1   1 1724.60  115.56   1
   2   1   1  245.58   16.70   1
  -2  -1  -1  230.21   15.79   1
   2   1   1  248.02   15.55   1
  -3  -1  -1   11.47    1.44   1
   3   1   1   11.69    1.06   4
   3   1   1   10.73    1.45   1
   3   1   1   12.74    1.32   1
  -4  -1  -1  175.46   11.39   1
  -4  -1  -1  171.91   11.06   1
   4   1   1  149.80   11.70   4
   4   1   1  157.61    9.86   1
   4   1   1  168.85   10.58   1
   5   1   1   14.60    2.00   1
   5   1   1   19.21    1.74   4
  -5  -1  -1   17.49    1.91   1
  -6  -1  -1  147.80   13.42   1
   6   1   1  155.67   10.04   1
   6   1   1  150.78    9.80   4
  -6  -1  -1  180.69   10.94   1
   6   1   1  148.30   10.64   1
  -7  -1  -1   77.40    7.66   1
   7   1   1   59.00    7.73   1
   7   1   1   66.43    4.81   4
   8   1   1   19.58    2.18   4
   8   1   1   15.58    3.06   1
  -9  -1  -1    6.73    1.66   1
   9   1   1    6.85    1.13   4
   9   1   1    4.87    1.95   1
  10   1   1    6.76    1.18   4
 -11  -1  -1    0.57    1.55   1
 -13  -1  -1   22.14    4.36   1
  12  -2  -1   -1.46    1.92   1
 -12   2   1    1.02    2.14   1
 -11   2   1    7.20    2.36   1
 -10   2   1    1.13    1.73   1
  10  -2  -1    0.63    0.87   4
   9  -2  -1    1.41    1.61   4
   9  -2  -1    5.41    2.10   1
  -9   2   1    2.24    1.94   1
   8  -2  -1    3.96    1.79   4
   8  -2  -1    2.95    1.80   1
  -8   2   1    2.69    1.41   1
   7  -2  -1    2.76    1.57   1
  -6   2   1   13.51    2.17   1
   6  -2  -1   19.82    2.56   1
  -5   2   1   76.25    5.39   1
  -5   2   1   61.93    4.43   1
   5  -2  -1   63.82    5.41   1
   5  -2  -1   72.99    5.70   1
  -4   2   1  406.37   26.98   1
   4  -2  -1  399.89   27.09   1
  -4   2   1  395.01   28.61   1
   4  -2  -1  417.74   24.86   1
  -3   2   1   14.58    2.30   1
  -3   2   1   17.98    5.92   1
   3  -2  -1   12.87    1.66   1
   3  -2  -1   18.24    2.46   1
   2  -2  -1  118.95    8.16   1
   2  -2  -1  125.08    7.46   1
  -2   2   1  117.86    8.15   1
  -2   2   1  114.35    8.02   1
  -1   2   1  178.71   11.17   1
   1  -2  -1  174.18   11.51   1
   1  -2  -1  175.47   20.20   1
  -1   2   1  174.06   13.70   1
   0  -2  -1  360.74   25.43   1
   0   2   1  427.36   27.71   1
   0   2   1  414.27   28.11   7
   0   2   1  387.85   24.97   1
   0  -2  -1  418.79   29.10   7
   0  -2  -1  397.00   26.92   1
   1   2   1    6.31    0.84   1
  -1  -2  -1    5.11    0.83   1
   1   2   1    6.10    0.85   2
  -2  -2  -1   -0.32    0.59   1
   2   2   1   -0.20    0.68   1
  -2  -2  -1    0.45    0.75   1
   2   2   1   -0.21    0.83   1
   3   2   1   10.85    1.59   1
  -3  -2  -1   11.86    1.62   1
  -3  -2  -1   10.70    1.47   1
   3   2   1   10.05    1.20   1
  -3  -2  -1    9.67    1.19   3
   4   2   1  184.11   11.14   1
  -4  -2  -1  167.91   11.08   3
   4   2   1  176.07   11.44   1
  -4  -2  -1  170.68   10.07   1
  -5  -2  -1   11.94    1.88   1
   5   2   1    9.11    1.27   1
  -5  -2  -1   10.93    2.02   1
   5   2   1   12.67    1.92   1
   5   2   1   10.00    1.03   4
   6   2   1   18.15    2.14   4
  -6  -2  -1   14.14    1.72   1
  -6  -2  -1   13.51    3.04   1
  -7  -2  -1   73.88    5.50   1
   7   2   1   77.59    6.08   1
   7   2   1   72.26    5.53   4
  -8  -2  -1    0.98    1.16   1
   8   2   1   -1.06    1.40   1
   9   2   1  107.83    9.51   4
  10   2   1    4.62    1.86   1
 -10  -2  -1    4.63    1.15   3
  11   2   1   49.07    6.19   1
 -11  -2  -1   47.68    4.86   1
 -11  -2  -1   41.15    6.14   3
 -12  -2  -1    7.65    2.36   1
  12   2   1    1.58    2.05   1
  13   2   1   -0.29    3.62   1
 -13  -2  -1   -3.61    2.02   1
 -12   3   1    6.88    2.63   1
  12  -3  -1   13.55    4.32   1
  11  -3  -1    4.95    2.61   1
 -10   3   1    3.62    1.83   1
   9  -3  -1   14.87    2.60   1
   9  -3  -1   10.97    2.17   4
   8  -3  -1    7.87    1.90   1
  -8   3   1   10.80    2.85   1
   8  -3  -1    6.15    1.72   4
   7  -3  -1   54.25    4.56   4
  -7   3   1   63.74    5.10   1
   7  -3  -1   75.01    4.98   1
   6  -3  -1    9.62    2.26   1
  -6   3   1   13.16    1.79   1
  -5   3   1  169.71   10.62   1
   5  -3  -1  134.52   10.82   1
   5  -3  -1  165.75   10.26   1
   4  -3  -1   -0.79    0.69   1
  -4   3   1   -0.05    0.98   1
   4  -3  -1   -1.27    0.78   1
   3  -3  -1   11.09    1.27   1
   3  -3  -1    7.69    1.60   1
  -3   3   1    8.05    1.71   1
   2  -3  -1  102.53    8.63   1
  -2   3   1  113.56    6.80   1
   2  -3  -1  104.35    9.03   1
  -2   3   1  101.08    6.91   1
   1  -3  -1    0.40    0.74   1
   1  -3  -1    0.16    0.66   1
  -1   3   1    0.69    0.61   1
   0   3   1  260.32   18.22   7
   0  -3  -1  252.37   17.62   7
   0   3   1  290.17   14.88   1
   0  -3  -1  254.32   16.71   5
   0  -3  -1  241.56   15.96   1
   0  -3  -1  240.36   17.02   1
   0   3   1  224.17   15.62   1
   1   3   1 4031.33 1025.83   1
  -1  -3  -1 4416.31  332.52   7
   1   3   1 4340.64  318.07   7
  -1  -3  -1 4533.39  285.93   1
   1   3   1 4331.96  300.01   2
   1   3   1 4452.78  274.15   1
  -1  -3  -1 4696.77  308.90   1
   2   3   1  164.62    9.64   1
   2   3   1  151.20   10.49   3
  -2  -3  -1  152.72    9.80   1
  -2  -3  -1  130.43   10.20   1
   2   3   1  155.95    9.64   1
  -3  -3  -1    2.12    2.11   1
  -3  -3  -1    0.73    0.72   3
   3   3   1    1.36    1.03   1
   3   3   1    0.04    0.57   3
  -4  -3  -1   65.37    5.21   1
   4   3   1   67.55    5.20   1
   4   3   1   56.44    5.30   1
  -4  -3  -1   69.12    4.56   3
  -5  -3  -1 1732.28  112.52   1
   5   3   1 1798.63  126.72   1
  -5  -3  -1 1831.07  116.86   1
  -5  -3  -1 1693.09  112.15   3
   6   3   1    1.23    1.73   1
  -6  -3  -1    0.03    0.83   1
  -6  -3  -1   -1.40    0.90   1
   7   3   1   25.05    3.11   1
  -7  -3  -1   26.40    3.29   1
  -7  -3  -1   27.03    2.33   3
   8   3   1   47.85    5.39   1
  -8  -3  -1   59.28    5.01   3
  -8  -3  -1   50.00    3.99   1
  -9  -3  -1   49.05    4.00   1
  -9  -3  -1   36.38    4.25   3
   9   3   1   51.74    5.56   1
 -10  -3  -1   46.42    4.00   3
 -11  -3  -1   49.55    5.55   3
  12   3   1    1.74    1.95   1
 -12  -3  -1    4.12    2.82   1
  13   3   1   -1.96    2.07   1
  11  -4  -1   22.00    4.99   1
 -11   4   1   15.36    3.87   1
  11  -4  -1   19.02    3.71   4
 -10   4   1   -3.95    2.15   1
  10  -4  -1   -1.62    1.42   4
  10  -4  -1    1.11    2.11   1
   9  -4  -1   48.42    5.03   4
  -9   4   1   49.85    6.30   1
   9  -4  -1   47.76    6.55   1
  -8   4   1    3.60    1.71   1
   8  -4  -1    3.00    1.75   4
   8  -4  -1    5.78    2.64   1
   7  -4  -1  163.64   13.18   4
  -7   4   1  182.12   12.51   1
   7  -4  -1  208.27   14.10   1
   6  -4  -1  169.04   11.71   1
  -6   4   1  165.53   11.24   1
   6  -4  -1  163.95   10.71   4
   5  -4  -1    6.99    1.95   1
   5  -4  -1    4.40    1.14   1
  -5   4   1    7.32    2.06   1
  -4   4   1   17.94    1.78   1
   4  -4  -1   16.86    2.11   1
  -4   4   1   17.93    2.42   1
   4  -4  -1   17.71    2.50   1
  -3   4   1   95.59    6.85   1
   3  -4  -1   97.08    5.88   1
   3  -4  -1   91.92    6.71   1
  -3   4   1   95.27    6.88   1
   2  -4  -1   93.00    9.07   1
   2  -4  -1   91.67    6.11   1
  -2   4   1   87.18    6.44   1
  -2   4   1   93.57    6.75   1
  -1   4   1   34.71    3.06   7
  -1   4   1   37.52    3.25   1
   1  -4  -1   43.57    3.29   1
  -1   4   1   37.83    3.31   1
   1  -4  -1   36.21    2.94   1
   0  -4  -1   14.07    1.97   7
   0   4   1   11.61    1.06   6
   0  -4  -1   10.41    0.97   5
  -1  -4  -1  172.37   13.39   6
  -1  -4  -1  174.63   11.92   7
   1   4   1  190.66   12.80   7
  -1  -4  -1  159.55   11.66   1
   1   4   1  192.79   13.65   5
   1   4   1  167.92   11.20   1
   1   4   1  197.22   12.09   1
   2   4   1  148.59   11.91   1
   2   4   1  143.01   33.51   2
   2   4   1  169.22   11.05   3
  -2  -4  -1  175.27   12.97   7
  -2  -4  -1  180.52   11.12   1
   2   4   1  169.48   10.47   1
  -2  -4  -1  187.01   10.36   1
   3   4   1   92.45    7.20   3
  -3  -4  -1  109.45    6.49   1
  -3  -4  -1  111.08    7.31   1
   3   4   1  114.00    6.80   1
   3   4   1  100.67    7.02   1
  -4  -4  -1   13.78    1.08   4
   4   4   1   12.58    2.13   1
  -4  -4  -1   13.35    1.36   3
   4   4   1   12.39    1.64   1
  -4  -4  -1   17.10   13.01   1
  -4  -4  -1   15.16    1.95   1
  -5  -4  -1    0.28    0.97   3
   5   4   1   -0.14    1.04   1
  -5  -4  -1   -1.65    1.06   1
  -5  -4  -1    2.91    2.58   1
  -6  -4  -1   54.06    5.07   1
  -6  -4  -1   56.74    4.06   1
   6   4   1   44.89    4.86   1
  -6  -4  -1   54.64    3.75   3
   7   4   1    6.32    1.71   1
  -7  -4  -1    8.54    1.20   3
  -8  -4  -1   35.24    2.68   3
   8   4   1   33.50    4.03   1
  -9  -4  -1    9.52    1.76   3
  -9  -4  -1    6.69    1.72   1
 -10  -4  -1   24.48    2.84   1
 -10  -4  -1   17.44    2.53   3
  12   4   1    2.25    2.73   1
 -12  -4  -1    1.12    2.11   1
  13   4   1   17.68    3.38   1
 -13  -4  -1   15.20    4.44   1
 -11   5   1    3.01    3.23   1
  11  -5  -1    3.16    1.99   4
 -10   5   1    1.01    1.90   1
  10  -5  -1    1.08    1.69   4
  10  -5  -1   -0.27    1.77   1
  -9   5   1   21.15    3.16   1
   9  -5  -1   22.79    3.37   1
   9  -5  -1   25.63    3.63   4
   8  -5  -1    2.42    2.24   4
  -8   5   1    3.77    1.54   1
   7  -5  -1    0.74    1.68   1
   7  -5  -1    2.54    2.45   4
  -7   5   1    1.51    1.32   1
   6  -5  -1    1.09    1.37   1
   6  -5  -1    2.85    1.77   4
  -6   5   1    2.78    1.47   1
   5  -5  -1   23.38    3.06   1
  -5   5   1   30.47    3.08   1
   5  -5  -1   31.11    5.57   1
  -4   5   1   29.21    2.80   1
   4  -5  -1   28.05    2.78   1
   3  -5  -1  103.22    7.35   1
   3  -5  -1   94.63    7.40   1
  -3   5   1   92.00    7.53   1
  -3   5   1  101.81    6.62   1
   2  -5  -1   92.32    5.73   1
  -2   5   1   90.44    6.92   1
   2  -5  -1   97.16    6.90   1
  -2   5   1   93.00    6.07   1
   1  -5  -1    2.53    1.21   1
   1  -5  -1    3.47    0.60   5
  -1   5   1    5.45    1.18   1
   1  -5  -1    1.48    1.27   1
  -1   5   1    2.75    1.48   1
   0  -5  -1  581.59   37.30   1
   0   5   1  579.89   39.84   7
   0  -5  -1  616.66   39.67   1
   0  -5  -1  559.50   40.20   2
   0   5   1  587.44   39.04   6
   0  -5  -1  583.24   40.83   7
   0  -5  -1  597.39   36.70   5
   0   5   1  648.96   40.36   1
   1   5   1   11.27    1.39   1
   1   5   1    8.52    0.84   5
   1   5   1   11.39    1.41   7
  -1  -5  -1    9.70    2.23   7
   1   5   1   10.44    1.55   1
   2   5   1  759.37  191.13   1
  -2  -5  -1  568.96   34.22   1
   2   5   1  521.57   34.72   2
  -2  -5  -1  519.80   33.98   1
  -2  -5  -1  508.68   38.18   6
   2   5   1  572.28   33.86   1
  -2  -5  -1  567.53   42.01   7
   3   5   1    8.03    1.93   1
   3   5   1    6.59    0.89   3
  -3  -5  -1    8.01    1.53   7
   3   5   1    7.05    1.51   2
   4   5   1  220.21   15.13   3
   4   5   1  245.30   15.04   1
  -4  -5  -1  208.69   14.48   1
  -4  -5  -1  211.79   16.97   4
  -4  -5  -1  235.81   14.68   1
   4   5   1  217.83   14.49   1
   5   5   1  101.00    8.44   1
  -5  -5  -1  104.54    6.64   1
   5   5   1  100.15    7.11   1
   5   5   1   93.49    6.37   3
  -5  -5  -1   98.87    6.77   1
  -5  -5  -1   92.95    6.32   3
  -6  -5  -1   69.65    4.63   3
  -6  -5  -1   73.22    6.12   1
   6   5   1   76.24    5.33   1
  -6  -5  -1   74.56    5.69   1
   7   5   1  174.25   11.84   1
  -7  -5  -1  188.12   13.39   1
  -7  -5  -1  164.37   10.87   3
  -8  -5  -1   35.78    3.15   1
  -8  -5  -1   33.87    2.86   3
   8   5   1   31.88    3.90   1
  -9  -5  -1   62.18    4.89   3
  -9  -5  -1   55.54    4.61   1
   9   5   1   58.16    5.76   1
  10   5   1   58.66    5.51   1
 -10  -5  -1   57.62    4.60   3
  11   5   1   -1.58    2.38   1
 -12  -5  -1    6.39    2.18   1
  12   5   1    3.32    2.30   1
  13   5   1    0.10    2.14   1
 -13  -5  -1    4.79    2.15   1
  10  -6  -1   -0.32    1.49   4
 -10   6   1    3.64    2.66   1
  10  -6  -1    0.98    3.35   1
  -9   6   1    0.47    1.67   1
   9  -6  -1    4.81    2.82   4
   9  -6  -1    1.84    1.72   1
   8  -6  -1  144.15   11.11   1
  -8   6   1  129.99   11.23   1
   8  -6  -1  112.32   10.39   4
   7  -6  -1   59.74    5.31   1
   7  -6  -1   63.31    6.49   4
  -7   6   1   68.87    5.51   1
   6  -6  -1    0.54    1.44   4
   6  -6  -1   -1.90    1.60   1
  -6   6   1   -0.78    1.01   1
  -5   6   1  132.16    9.80   1
   5  -6  -1  132.12    8.48   1
   4  -6  -1   26.26    3.19   1
  -4   6   1   26.31    2.97   1
  -3   6   1   11.64    1.78   1
   3  -6  -1   14.90    2.40   1
   3  -6  -1   16.26    1.94   1
   2  -6  -1  615.59   36.74   1
  -2   6   1  576.34   36.33   1
  -2   6   1  513.39   42.77   1
   2  -6  -1  488.81   36.22   1
  -2   6   1  625.52   46.72   7
  -1   6   1  145.69   11.35   1
  -1   6   1  141.71   13.32   1
  -1   6   1  153.03    9.89   7
   1  -6  -1  128.35   10.22   1
   1  -6  -1  148.08    9.24   5
   1  -6  -1  137.00    8.79   1
   0   6   1  162.31   13.16   7
   0  -6  -1  168.45   13.43   1
   0  -6  -1  177.29   11.31   5
   0   6   1  192.13   12.01   1
   0  -6  -1  176.70   17.26   2
   0   6   1  166.11   11.87   6
   0  -6  -1  197.91   11.92   1
   0   6   1  180.45   12.29   1
   0  -6  -1  177.63   13.26   7
   1   6   1    4.52    1.50   1
  -1  -6  -1    2.43    1.89   7
   1   6   1    3.18    0.51   5
   1   6   1    4.38    0.82   1
  -1  -6  -1    0.24    1.86   1
  -1  -6  -1    3.51    1.07   1
   2   6   1    3.62    0.87   1
  -2  -6  -1    4.74    1.40   1
  -2  -6  -1    4.86    2.18   7
  -2  -6  -1    4.45    1.20   6
   3   6   1  851.95  185.14   2
  -3  -6  -1  942.18   61.75   1
   3   6   1  947.01   61.43   1
   3   6   1  959.16   59.51   1
  -3  -6  -1  936.45   64.90   7
   3   6   1  938.12   65.58   3
  -4  -6  -1   16.12    2.15   1
   4   6   1   15.09    1.78   3
   4   6   1   19.54    2.12   1
   4   6   1   17.72    1.64   1
  -4  -6  -1   16.69    1.99   4
  -4  -6  -1   12.50    2.18   1
  -4  -6  -1   19.60    3.59   7
   5   6   1   12.12    1.70   1
   5   6   1    9.64    1.62   3
  -5  -6  -1    9.22    1.39   1
  -6  -6  -1    8.53    1.66   1
   6   6   1    7.87    1.60   1
  -6  -6  -1    8.22    1.41   1
  -7  -6  -1   11.52    1.73   3
  -7  -6  -1   14.22    2.38   1
  -8  -6  -1   37.32    2.97   3
   8   6   1   49.89    4.54   1
  -9  -6  -1   18.44    2.46   1
  -9  -6  -1   17.47    1.96   3
 -10  -6  -1    2.98    1.03   3
  11   6   1   38.83    4.67   1
 -11  -6  -1   43.32    4.60   1
 -12  -6  -1    9.05    2.83   1
  12   6   1    5.12    3.45   1
  13   6   1    2.92    2.07   1
 -13  -6  -1    1.43    2.61   1
  10  -7  -1    8.71    3.61   1
 -10   7   1    7.82    2.35   1
  -9   7   1   -0.47    1.56   1
   9  -7  -1    1.64    1.98   1
   9  -7  -1    5.02    2.30   4
  -8   7   1    4.78    2.01   1
   8  -7  -1    9.16    3.04   4
   8  -7  -1    1.25    2.27   1
   7  -7  -1   43.07    4.06   1
   7  -7  -1   50.37    5.22   4
  -7   7   1   49.93    4.56   1
   6  -7  -1   10.27    2.57   1
  -6   7   1   11.23    2.19   1
   6  -7  -1    9.83    2.58   4
   5  -7  -1    6.44    1.77   1
  -5   7   1    3.74    1.50   1
   4  -7  -1   29.96    3.20   4
  -4   7   1   28.47    2.79   1
   4  -7  -1   29.78    3.63   1
   3  -7  -1  144.71   12.42   1
  -3   7   1  132.06   10.86   1
   3  -7  -1  128.49   10.55   1
  -2   7   1    7.24    2.18   7
   2  -7  -1    5.02    0.95   5
  -2   7   1    7.37    1.43   1
   2  -7  -1    5.44    1.20   1
  -1   7   1    3.84    0.99   1
  -1   7   1    4.54    1.65   7
   1  -7  -1    4.16    0.86   5
   1  -7  -1    2.05    1.24   1
  -1   7   1    2.89    1.04   1
   0  -7  -1   87.40    6.58   5
   0  -7  -1   95.77    6.63   2
   0   7   1   99.74    7.83   7
   0   7   1   96.61    6.54   1
   0   7   1   87.10    6.38   6
   0   7   1   97.02    7.13   1
   0  -7  -1   94.68    6.52   1
   0  -7  -1   90.80    6.45   1
   1   7   1  363.20   25.05   1
  -1  -7  -1  358.46   22.25   1
   1   7   1  322.12   22.52   7
   1   7   1  352.82   23.26   1
  -1  -7  -1  341.00   23.23   7
   1   7   1  348.17   23.42   5
  -2  -7  -1  409.55   29.83   1
   2   7   1  441.92   27.06   1
  -2  -7  -1  431.75   34.20   7
   2   7   1  421.82   29.00   1
   2   7   1  357.37   26.69   7
  -2  -7  -1  390.57   32.18   6
   2   7   1  416.27   26.26   5
  -2  -7  -1  419.53   29.71   1
   3   7   1   85.70    6.75   3
  -3  -7  -1   85.00    6.66   7
  -3  -7  -1   77.61    5.92   6
  -3  -7  -1   94.92    6.69   4
  -3  -7  -1   94.35    6.93   1
   3   7   1   97.85   27.71   1
   3   7   1   99.91    6.55   2
   3   7   1   86.15    6.14   1
  -3  -7  -1   95.94    7.19   1
   4   7   1   40.80   11.73   2
  -4  -7  -1   48.06    4.21   1
  -4  -7  -1   45.47    4.04   1
  -4  -7  -1   54.21    5.16   7
  -4  -7  -1   41.94    3.61   4
   4   7   1   46.62    4.03   3
  -5  -7  -1   64.10    5.92   7
   5   7   1   65.52    5.04   3
  -5  -7  -1   61.56    4.83   4
   5   7   1   79.07    5.74   1
  -5  -7  -1   72.16    5.10   1
  -5  -7  -1   72.28    5.60   1
   6   7   1    6.14    1.56   1
  -6  -7  -1    4.29    0.64   4
  -6  -7  -1    5.67    1.24   1
   7   7   1  112.76   10.07   1
  -8  -7  -1  246.56   16.84   1
   8   7   1  244.65   15.58   1
   9   7   1   25.02    3.76   1
  -9  -7  -1   25.66    2.57   3
  10   7   1    3.60    1.83   1
 -10  -7  -1    3.12    1.07   3
 -11  -7  -1   28.55    3.73   1
  11   7   1   30.02    6.38   1
 -12  -7  -1   61.78    8.18   1
  12   7   1   78.21   12.04   1
  -9   8   1    1.43    1.73   1
   9  -8  -1    1.81    1.86   4
   9  -8  -1    1.28    1.84   1
   8  -8  -1    2.04    2.06   4
  -8   8   1    5.22    2.27   1
   8  -8  -1    2.12    1.76   1
  -7   8   1   42.35    4.21   1
   7  -8  -1   36.66    4.38   1
   7  -8  -1   42.14    4.71   4
   6  -8  -1   -0.63    1.53   4
   6  -8  -1    4.40    2.27   1
  -6   8   1    2.18    2.03   1
  -5   8   1   -0.02    0.95   1
   5  -8  -1    0.62    2.03   4
   5  -8  -1   -2.13    1.25   1
   4  -8  -1   23.24    2.39   1
  -4   8   1   27.83    3.51   1
   4  -8  -1   19.31    3.86   4
   4  -8  -1   24.26    3.54   1
   3  -8  -1  153.46   10.68   5
  -3   8   1  150.79   10.26   1
   3  -8  -1  150.64    9.41   1
   3  -8  -1  155.02   12.69   1
   2  -8  -1   21.94    2.29   1
   2  -8  -1   23.65    1.88   5
  -2   8   1   18.01    2.16   1
   2  -8  -1   24.88    2.66   1
   1  -8  -1  112.19    6.40   5
  -1   8   1   99.02    8.54   7
  -1   8   1   99.50   10.40   1
   1  -8  -1  113.52    8.37   1
   1  -8  -1  100.10    8.15   1
   0  -8  -1   17.52    1.45   5
   0   8   1   13.78    2.71   7
   0  -8  -1   20.03    2.22   1
   0  -8  -1   18.44    2.59   1
   0   8   1   19.23    1.99   6
   0   8   1   14.31    1.78   1
   1   8   1  145.85    9.30   1
  -1  -8  -1  126.29   11.14   7
   1   8   1  120.77    8.74   7
   1   8   1  128.42    8.26   5
  -1  -8  -1  116.73    8.19   1
   2   8   1   40.09    3.32   1
  -2  -8  -1   42.24    3.90   1
   2   8   1   38.21    3.58   1
   2   8   1   36.13    3.80   7
   2   8   1   43.16    3.28   5
  -2  -8  -1   48.96    5.15   7
   3   8   1    4.16    1.05   2
  -3  -8  -1    3.76    1.25   6
   3   8   1    4.84    1.54   3
  -3  -8  -1    4.27    0.95   1
  -3  -8  -1    4.30    1.51   1
  -3  -8  -1    5.85    2.03   7
  -4  -8  -1   17.35    1.89   4
  -4  -8  -1   17.98    2.23   1
  -4  -8  -1   13.54    2.08   6
   4   8   1   16.41    1.85   2
  -4  -8  -1   15.51    2.56   1
  -4  -8  -1   20.37    2.84   7
   5   8   1    2.19    1.02   1
  -5  -8  -1    1.14    0.93   1
  -5  -8  -1    2.82    1.04   4
  -5  -8  -1    6.79    2.66   7
   6   8   1   59.65    5.68   3
  -6  -8  -1   60.96    4.94   1
   6   8   1   72.61    6.40   1
  -6  -8  -1   64.02    5.25   4
  -6  -8  -1   60.31    6.05   7
   7   8   1   16.28    2.10   3
   7   8   1   19.66    2.42   1
   8   8   1    0.38    1.25   1
   9   8   1    7.63    2.82   1
  10   8   1    2.58    2.50   1
 -10  -8  -1    2.19    1.76   1
  11   8   1    4.12    2.21   1
 -12  -8  -1   11.90    3.44   1
  12   8   1   12.02    2.97   1
  -9   9   1    2.03    2.04   1
   9  -9  -1    1.05    1.82   1
   9  -9  -1    0.11    1.93   4
   8  -9  -1   45.57    5.58   1
   8  -9  -1   39.84    4.56   4
  -8   9   1   50.82    6.43   1
   7  -9  -1    8.11    2.20   1
   7  -9  -1   10.28    2.89   4
  -7   9   1    8.15    1.98   1
   6  -9  -1   30.76    3.56   1
  -6   9   1   32.53    3.74   1
   6  -9  -1   26.69    3.41   4
   5  -9  -1    4.06    1.66   1
   5  -9  -1    1.27    2.62   4
   5  -9  -1    2.02    1.24   5
   4  -9  -1   47.00    5.48   4
   4  -9  -1   48.59    4.64   1
   4  -9  -1   49.01    4.49   5
  -4   9   1   57.13    5.76   1
   3  -9  -1  144.49    8.58   5
  -3   9   1  129.74    9.79   1
   3  -9  -1  133.93    9.00   1
   3  -9  -1  132.25   11.43   4
   3  -9  -1  126.17   12.73   1
   2  -9  -1    6.93    1.07   5
   2  -9  -1    5.11    2.49   4
   2  -9  -1    8.34    1.67   1
   2  -9  -1    9.53    2.04   1
   1  -9  -1   18.97    1.64   5
   1  -9  -1   18.98    1.93   1
   0   9   1  147.72   11.15   1
   0  -9  -1  130.68    9.10   1
   0  -9  -1  144.46    9.92   1
   0   9   1  147.63    9.76   6
  -1  -9  -1    0.47    0.88   1
  -1  -9  -1    2.42    2.20   7
  -1  -9  -1   -0.70    1.49   1
  -1  -9  -1    0.38    1.14   4
   1   9   1    0.29    0.60   5
   1   9   1   -0.70    0.91   1
   2   9   1   28.85    3.00   1
  -2  -9  -1   25.08    2.51   1
  -2  -9  -1   33.60    4.57   7
  -2  -9  -1   28.82    3.37   4
   2   9   1   25.03    2.49   5
  -2  -9  -1   27.20    2.40   1
  -3  -9  -1   85.92    8.31   1
  -3  -9  -1  101.31    8.00   1
   3   9   1  106.28    9.00   5
   3   9   1  110.50    9.25   1
  -3  -9  -1   90.74    8.46   4
  -3  -9  -1   92.59    8.00   6
  -4  -9  -1  107.03    8.30   1
  -4  -9  -1   98.95    7.90   4
   4   9   1  117.54   31.99   1
   4   9   1   99.15    8.48   2
  -4  -9  -1  103.02    9.25   7
  -4  -9  -1   81.78    8.73   6
   4   9   1   97.74    8.62   3
   5   9   1   45.93   36.45   1
  -5  -9  -1   58.58    4.57   1
   5   9   1   58.45    4.08   2
  -5  -9  -1   52.85    4.79   4
   5   9   1   50.33    4.59   3
  -5  -9  -1   62.55    6.13   1
  -5  -9  -1   62.76    5.80   7
  -6  -9  -1    4.36    1.95   7
   6   9   1    5.62    1.42   3
  -6  -9  -1    3.92    1.02   4
   6   9   1    4.67    1.40   1
  -6  -9  -1    4.99    1.88   1
   6   9   1    1.76    1.77   2
   7   9   1   30.47   10.57   2
  -7  -9  -1   52.16    4.70   7
   7   9   1   50.71    6.08   1
   7   9   1   52.58    5.08   3
   8   9   1    8.72    1.91   1
  -8  -9  -1   10.82    3.16   7
   9   9   1    1.23    2.04   1
  10   9   1    5.16    2.49   1
  11   9   1   -1.93    1.55   1
 -11  -9  -1    0.85    1.85   1
  12   9   1   47.28    7.13   1
 -12  -9  -1   58.60    6.19   1
   8 -10  -1   23.13    3.51   5
   8 -10  -1   31.83    4.26   1
  -8  10   1   32.77    4.92   1
  -7  10   1   -0.17    1.42   1
   7 -10  -1    0.01    2.17   4
   7 -10  -1   -3.12    2.18   1
   6 -10  -1   -0.10    1.97   4
  -6  10   1   -0.10    1.20   1
   6 -10  -1    0.70    1.35   1
   5 -10  -1   70.56    6.40   1
   5 -10  -1   61.62    5.77   5
   5 -10  -1   72.70    8.17   4
  -5  10   1   62.97    8.72   1
   4 -10  -1   -0.18    0.92   5
   4 -10  -1    2.17    1.78   4
   4 -10  -1    1.30    1.83   1
  -4  10   1    0.57    1.27   1
   3 -10  -1    0.08    1.08   1
  -3  10   1   -0.45    1.09   1
   3 -10  -1   -1.12    1.52   1
   3 -10  -1   -0.37    2.73   4
   2 -10  -1  151.48   12.98   1
   2 -10  -1  171.30   12.40   5
   2 -10  -1  181.50   14.07   1
  -2  10   1  191.17   15.20   1
   2 -10  -1  202.10   16.16   4
  -1  10   1  106.95    7.74   6
  -1  10   1  123.80   12.35   1
   1 -10  -1  118.86    9.99   4
   1 -10  -1  115.87    7.97   5
   1 -10  -1  107.97    7.83   1
   0  10   1  108.99    8.85   1
   0 -10  -1  119.20    9.24   1
   0  10   1  102.85    7.18   6
   0 -10  -1  105.14    8.11   4
  -1 -10  -1   78.11    5.61   4
  -1 -10  -1   73.79    6.39   7
   1  10   1   67.81    6.32   1
  -1 -10  -1   67.79    6.02   1
  -2 -10  -1   38.32    3.56   1
  -2 -10  -1   30.52    3.47   7
  -2 -10  -1   39.99    3.68   1
   2  10   1   32.76    2.81   5
   2  10   1   39.28    3.48   1
  -3 -10  -1    8.37    2.52   7
   3  10   1   13.49    2.00   1
  -3 -10  -1   11.27    2.08   4
  -3 -10  -1    8.40    1.70   1
   3  10   1   11.85    1.40   5
  -4 -10  -1  268.95   21.45   1
   4  10   1  293.30   23.38   5
  -4 -10  -1  290.12   22.38   7
  -4 -10  -1  267.34   22.58   4
   4  10   1  240.34   21.66   1
  -4 -10  -1  280.31   20.28   1
  -5 -10  -1   -0.08    1.01   4
  -5 -10  -1    0.86    0.91   1
  -5 -10  -1    2.19    1.94   1
   5  10   1    1.30    2.12   1
   5  10   1   -1.13    1.18   2
  -5 -10  -1    0.34    2.02   7
  -6 -10  -1    3.11    1.67   1
   6  10   1    4.26    2.54   1
  -6 -10  -1    5.04    2.74   7
   7  10   1    6.00    1.75   2
  -7 -10  -1    0.69    1.83   7
   7  10   1    2.97    1.88   1
   8  10   1    2.96    1.42   1
  -8 -10  -1   -0.47    2.54   7
  -9 -10  -1    4.26    2.79   1
  -9 -10  -1    5.09    2.22   7
 -10 -10  -1   15.37    4.58   7
  10  10   1   16.91    2.67   1
 -10 -10  -1   11.43    2.71   1
 -11 -10  -1   13.30    3.54   7
 -12 -10  -1   -1.10    1.99   1
  12  10   1   -0.32    1.87   1
   7 -11  -1    3.46    2.40   1
   7 -11  -1   -0.83    1.97   4
   6 -11  -1   14.29    3.13   1
  -6  11   1    8.66    2.39   1
   6 -11  -1    9.99    1.82   5
   6 -11  -1   13.35    3.14   4
  -5  11   1   21.75    3.44   1
   5 -11  -1   24.97    3.40   1
   5 -11  -1   17.90    2.52   5
   5 -11  -1   16.68    3.05   4
   4 -11  -1   11.98    2.31   1
   4 -11  -1   13.62    2.20   5
  -4  11   1   12.67    2.18   1
   3 -11  -1   18.08    1.84   5
   3 -11  -1   14.29    2.88   4
  -3  11   1   13.46    1.91   1
   3 -11  -1   14.75    2.28   1
   2 -11  -1    2.31    1.80   1
   2 -11  -1    3.22    1.00   5
  -2  11   1    0.35    1.60   1
  -2  11   1    1.87    0.86   6
   2 -11  -1   -0.48    1.65   1
   2 -11  -1    2.09    2.21   4
   1 -11  -1   28.04    3.21   4
   1 -11  -1   23.85    2.18   5
   1 -11  -1   27.17    2.86   1
  -1  11   1   22.98    2.38   6
   1 -11  -1   25.50    2.84   1
  -1  11   1   33.01    3.91   1
   0  11   1    1.07    0.80   6
   0 -11  -1   -1.07    1.28   1
   0 -11  -1    0.79    1.49   4
   0  11   1    0.10    1.16   1
   0 -11  -1    0.26    1.48   1
   1  11   1   42.30    3.34   1
  -1 -11  -1   37.66    4.30   1
  -1 -11  -1   42.39    4.79   4
  -1 -11  -1   40.15    3.38   1
  -2 -11  -1   11.46    3.65   7
  -2 -11  -1    6.93    1.91   1
  -2 -11  -1    5.53    1.82   4
   2  11   1    7.37    1.82   1
   2  11   1    4.86    0.98   5
  -2 -11  -1    6.12    1.47   1
  -3 -11  -1   17.21    2.91   7
  -3 -11  -1   19.41    3.20   4
   3  11   1   21.18    2.68   1
   3  11   1   22.19    1.97   5
  -3 -11  -1   19.22    2.49   1
  -3 -11  -1   19.88    2.04   1
  -4 -11  -1  116.34    9.02   1
  -4 -11  -1   92.56    9.86   1
   4  11   1  120.90    8.85   1
  -4 -11  -1  113.12    8.88   4
  -4 -11  -1  108.65   11.38   7
   4  11   1  105.35   10.11   5
  -5 -11  -1  126.52   10.23   1
  -5 -11  -1  121.83   10.86   1
   5  11   1  147.57   15.96   5
  -5 -11  -1  148.67   12.69   4
  -5 -11  -1  146.49   14.14   7
   5  11   1  140.94   10.56   1
  -6 -11  -1   34.51    4.52   1
  -6 -11  -1   37.02    6.02   7
  -6 -11  -1   37.02    3.23   4
  -6 -11  -1   39.10    4.52   1
   6  11   1   38.20    3.51   2
   7  11   1   14.16    2.32   2
  -7 -11  -1   12.54    3.58   7
  -7 -11  -1    9.90    1.77   4
  -7 -11  -1    9.06    2.97   1
   8  11   1   20.13    3.15   1
   8  11   1   13.72    5.02   2
  -8 -11  -1   13.52    3.24   7
   9  11   1    7.17    2.72   2
   9  11   1   12.10    2.23   1
  10  11   1    4.27    1.98   1
 -10 -11  -1    5.26    2.61   1
 -10 -11  -1   10.16    3.79   7
  11  11   1    0.11    1.93   1
 -11 -11  -1    0.17    2.05   1
 -11 -11  -1   -2.86    2.02   7
   7 -12  -1    4.46    1.98   1
   6 -12  -1    6.22    1.90   1
   6 -12  -1    0.71    2.19   4
   5 -12  -1   32.40    4.09   4
  -4  12   1    3.41    1.93   1
   4 -12  -1    4.92    2.69   4
  -3  12   1   19.20    2.67   1
   3 -12  -1   15.40    2.83   1
   3 -12  -1   20.66    3.05   5
   3 -12  -1   25.32    3.36   4
   2 -12  -1    6.41    2.94   4
   2 -12  -1    5.54    1.89   1
  -2  12   1    2.86    1.35   6
  -2  12   1    4.79    1.78   1
   2 -12  -1    2.42    0.91   5
  -1  12   1   85.93    7.61   6
   1 -12  -1  108.31    8.12   1
   1 -12  -1   92.29    8.05   4
  -1  12   1  103.69    9.05   1
   0 -12  -1   14.36    2.93   1
   0  12   1   14.52    2.05   1
   1  12   1   87.28    6.70   1
  -1 -12  -1   79.24    6.92   1
  -1 -12  -1   80.40    7.89   4
  -2 -12  -1    5.50    1.54   1
   2  12   1    6.55    1.56   1
  -2 -12  -1    6.01    1.57   1
  -2 -12  -1    7.10    2.42   7
   2  12   1    6.31    0.86   5
  -2 -12  -1    5.78    1.71   4
   3  12   1   68.04    8.56   5
  -3 -12  -1   61.42    6.97   1
  -3 -12  -1   63.57    6.31   4
   3  12   1   54.40    5.18   1
  -3 -12  -1   67.10    6.21   7
  -4 -12  -1  106.45   10.13   7
   4  12   1  114.43    8.51   1
  -4 -12  -1  116.03    8.29   4
   4  12   1  115.93    8.64   5
  -5 -12  -1  145.18   10.10   1
  -5 -12  -1  147.87   14.25   7
   5  12   1  141.94   12.61   1
  -5 -12  -1  132.56   14.36   4
  -6 -12  -1  366.18   28.51   7
  -6 -12  -1  335.45   27.20   4
  -6 -12  -1  359.33   25.92   1
   7  12   1   10.00    2.13   2
   8  12   1   19.22    2.47   2
  -8 -12  -1   21.78    2.89   1
  -8 -12  -1   24.45    4.28   7
  -9 -12  -1   28.19    6.20   7
  -9 -12  -1   35.23    3.97   1
   9  12   1   42.44    5.47   1
 -10 -12  -1    3.85    2.36   1
 -10 -12  -1   -1.78    3.40   7
 -11 -12  -1    1.95    2.57   7
 -11 -12  -1   -1.78    1.96   1
   6 -13  -1    2.90    1.74   1
   5 -13  -1    0.65    1.41   1
   5 -13  -1   -2.08    2.63   4
   4 -13  -1    5.89    2.08   1
   3 -13  -1   15.17    5.24   4
   3 -13  -1   12.04    2.16   1
   2 -13  -1    9.88    1.78   1
  -2  13   1    8.75    2.10   1
  -2  13   1    7.08    1.44   6
  -1  13   1   70.18    6.37   1
   1 -13  -1   61.84    7.57   1
  -1  13   1   76.84    8.37   6
   1 -13  -1   71.70    7.61   4
   0 -13  -1    1.92    1.17   1
   0  13   1    0.91    1.03   1
   0 -13  -1    0.45    2.79   4
  -1 -13  -1   16.53    2.63   4
  -1 -13  -1   16.93    2.43   1
   1  13   1   16.51    5.34   1
  -2 -13  -1    0.36    1.47   1
  -2 -13  -1   -0.84    1.48   4
  -2 -13  -1    1.49    1.89   7
   2  13   1    1.90    1.35   1
  -3 -13  -1    1.93    2.89   7
  -3 -13  -1   -0.67    1.40   4
  -4 -13  -1    3.57    1.71   4
  -4 -13  -1    6.33    1.67   1
  -4 -13  -1    2.05    2.36   7
  -5 -13  -1    3.63    3.90   7
  -5 -13  -1    1.26    1.14   4
  -5 -13  -1    1.66    1.74   1
   5  13   1   -0.60    1.99   1
  -6 -13  -1   18.04    4.29   7
  -6 -13  -1   20.95    2.25   4
  -7 -13  -1   21.27    2.82   1
  -7 -13  -1   16.50    5.38   7
  -8 -13  -1    0.28    2.02   1
  -8 -13  -1    1.53    2.56   7
   8  13   1    0.43    1.30   2
  -9 -13  -1   20.60    4.27   1
  -9 -13  -1   27.13    5.84   7
 -10 -13  -1    9.10    2.34   1
   4 -14  -1   11.32    3.05   4
   4 -14  -1    6.32    2.17   1
   2 -14  -1   19.49    3.18   1
   2 -14  -1   15.45    3.06   4
   1 -14  -1   11.68    2.72   4
   0 -14  -1    6.88    1.79   1
   0 -14  -1    7.68    3.18   4
  -1 -14  -1   18.78    2.90   1
  -1 -14  -1   12.15    3.12   4
  -2 -14  -1    7.82    1.54   1
  -2 -14  -1   11.58    2.34   4
  -3 -14  -1    2.94    1.38   1
  -3 -14  -1    2.62    2.39   4
  -3 -14  -1    8.20    3.53   7
  -4 -14  -1    0.31    1.38   4
  -4 -14  -1    1.80    2.11   7
  -4 -14  -1    0.67    2.10   1
  -5 -14  -1   46.66    6.59   7
  -5 -14  -1   41.42    5.26   4
  -5 -14  -1   54.51    5.48   1
  -6 -14  -1    5.29    3.27   7
  -6 -14  -1    2.83    1.73   4
  -6 -14  -1    2.00    1.73   1
  -7 -14  -1   33.63    3.88   1
  -7 -14  -1   28.15    4.51   7
  -8 -14  -1    5.07    1.69   1
  -8 -14  -1   -1.22    2.68   7
  -9 -14  -1    7.03    3.94   7
   3 -15  -1   21.52    2.71   1
   3 -15  -1   16.54    3.96   4
   2 -15  -1   10.69    2.05   1
   2 -15  -1    7.54    2.77   4
   1 -15  -1   15.90    2.24   1
   1 -15  -1   12.79    3.42   4
   0 -15  -1    0.16    1.12   1
   0 -15  -1    1.98    2.18   4
  -1 -15  -1   16.42    3.00   1
  -1 -15  -1   16.59    3.07   4
  -2 -15  -1   20.78    4.12   4
  -2 -15  -1   29.10    3.86   1
  -3 -15  -1    2.42    4.27   7
  -3 -15  -1    2.32    2.42   4
  -4 -15  -1   -0.58    1.47   1
  -4 -15  -1    1.10    1.77   4
  -4 -15  -1    0.26    2.52   7
  -5 -15  -1    3.14    2.17   4
  -5 -15  -1    3.94    1.75   1
  -5 -15  -1   -0.41    2.25   7
  -6 -15  -1   40.54    4.83   1
  -6 -15  -1   28.92    4.92   7
  -7 -15  -1    6.57    1.83   1
  -7 -15  -1    5.41    3.52   7
  -8 -15  -1   26.93    4.97   7
  -8 -15  -1   22.34    4.25   1
   1 -16  -1    5.44    2.30   1
   0 -16  -1    3.73    1.83   1
   0 -16  -1    0.62    2.14   4
  -1 -16  -1    4.87    2.44   4
  -1 -16  -1    7.02    1.62   1
  -2 -16  -1   29.48    3.53   1
  -2 -16  -1   33.54    6.21   4
  -3 -16  -1    0.08    1.64   1
  -3 -16  -1    4.04    2.49   4
  -4 -16  -1   -4.02    3.55   7
  -4 -16  -1   -1.26    1.36   4
  -5 -16  -1    3.00    2.27   4
  -5 -16  -1    4.40    2.25   1
  -6 -16  -1   58.11    8.03   7
  -6 -16  -1   42.05    5.26   1
  -7 -16  -1   28.52    4.87   7
  -5 -16   2    8.80    2.94   4
  -5 -16   2   13.28    5.38   7
  -5 -16   2   12.26    2.42   1
  -4 -16   2   29.64    6.06   7
  -4 -16   2   18.30    3.70   1
  -4 -16   2   20.74    3.70   4
  -3 -16   2   -0.20    1.55   4
  -3 -16   2   -0.67    0.83   1
  -2 -16   2    6.05    2.57   4
  -2 -16   2    3.60    1.18   1
  -1 -16   2   15.36    2.47   1
  -1 -16   2   10.35    3.07   4
   0 -16   2    2.10    1.30   1
   0 -16   2    2.92    3.04   4
   1 -16   2    6.77    2.63   4
  -8 -15   2    3.55    3.32   7
  -6 -15   2    2.60    3.92   7
  -6 -15   2    6.62    1.41   1
  -5 -15   2   60.13    5.49   1
  -5 -15   2   44.59    6.30   7
  -5 -15   2   52.85    7.41   4
  -4 -15   2   14.92    2.31   1
  -4 -15   2   15.14    2.73   4
  -3 -15   2   21.15    2.48   1
  -3 -15   2   14.18    2.63   4
  -3 -15   2   24.51    4.65   7
  -2 -15   2    0.14    0.80   1
  -2 -15   2   -2.38    1.54   4
  -1 -15   2    9.11    2.41   4
  -1 -15   2    8.28    1.45   1
   0 -15   2    6.03    1.90   1
   0 -15   2    5.56    3.37   4
   1 -15   2    1.54    3.01   4
   2 -15   2    1.99    2.24   4
   2 -15   2    5.48    2.02   1
   3 -15   2   -0.59    2.27   4
  -9 -14   2    3.03    1.94   1
  -9 -14   2    4.05    2.98   7
   8  14  -2   10.11    2.23   2
  -8 -14   2    9.68    2.35   1
  -8 -14   2    3.16    3.74   7
   7  14  -2   75.42   10.29   2
  -7 -14   2   75.32    6.99   1
  -7 -14   2   71.74    9.57   7
  -6 -14   2   -3.06    2.74   7
  -5 -14   2    8.51    2.44   1
  -5 -14   2    8.20    3.02   7
  -4 -14   2    1.23    1.31   4
  -3 -14   2    7.34    1.68   1
  -3 -14   2   11.60    2.57   4
  -3 -14   2    3.87    2.77   7
  -2 -14   2   16.58    2.68   1
  -2 -14   2   15.70    3.46   4
  -1 -14   2    8.28    2.92   4
  -1 -14   2    9.28    1.90   1
   0  14  -2   10.96    1.75   6
   0 -14   2    8.41    3.39   4
   1 -14   2    4.35    2.05   1
  -1  14  -2    1.49    1.11   6
  -2  14  -2   -2.61    2.42   6
   2 -14   2    1.17    2.55   4
   3 -14   2    8.88    3.61   4
   3 -14   2    4.93    1.44   1
   4 -14   2    3.22    2.62   4
   4 -14   2    5.72    2.18   1
 -10 -13   2    8.54    2.71   1
 -10 -13   2    0.87    2.77   7
  -9 -13   2    4.79    3.05   7
  -9 -13   2    0.49    1.39   1
   9  13  -2    1.36    1.53   2
  -8 -13   2    9.79    3.36   7
  -8 -13   2    6.29    2.26   1
   7  13  -2   -0.35    1.35   2
  -7 -13   2    0.78    1.67   1
  -7 -13   2    2.24    2.41   7
  -6 -13   2   -0.97    2.78   7
  -6 -13   2    0.11    1.76   1
  -6 -13   2   -1.59    1.37   4
   6  13  -2    3.24    1.67   2
  -5 -13   2    0.20    1.00   1
  -5 -13   2    1.75    1.94   4
  -5 -13   2    3.79    3.24   7
  -4 -13   2   11.39    2.44   4
  -4 -13   2   15.54    2.23   1
  -4 -13   2   11.72    2.93   7
  -3 -13   2    3.04    1.25   1
  -3 -13   2    2.96    3.32   7
  -2 -13   2    3.58    1.34   1
  -2 -13   2    3.89    1.86   4
  -2 -13   2    4.77    3.08   7
  -1 -13   2   31.21    3.17   1
   0 -13   2   61.66    5.78   1
   0 -13   2   58.20    5.39   4
   0  13  -2   69.00    5.46   6
   1 -13   2    7.06    2.96   4
   1 -13   2    1.07    1.38   1
  -1  13  -2    1.22    1.61   6
   2 -13   2  116.19   11.64   5
   2 -13   2  112.23    9.86   4
   2 -13   2  128.30    9.91   1
  -2  13  -2   97.29   13.71   6
   3 -13   2   59.43    6.38   1
   3 -13   2   52.93    7.09   4
   4 -13   2    6.12    1.57   1
   4 -13   2    9.49    3.15   4
   5 -13   2    3.93    2.43   4
 -10 -12   2    0.77    2.74   7
 -10 -12   2   -1.73    1.56   1
  -9 -12   2    7.23    2.28   1
  -8 -12   2    0.40    3.33   7
   8  12  -2    4.63    1.90   2
  -8 -12   2    0.91    1.34   1
  -7 -12   2    9.19    2.58   1
  -7 -12   2   15.20    4.72   7
   7  12  -2    4.80    3.11   2
  -6 -12   2   45.26    5.47   1
   6  12  -2   50.42    4.48   2
  -6 -12   2   34.42    4.70   7
  -6 -12   2   37.59    4.88   4
   5  12  -2   20.30    2.55   1
  -5 -12   2   16.14    2.34   1
  -5 -12   2   19.86    2.74   4
   5  12  -2   18.68    2.53   2
  -4 -12   2    3.14    1.21   1
  -4 -12   2    5.91    2.20   4
  -3 -12   2    5.84    1.64   1
  -3 -12   2    6.89    2.42   4
   3  12  -2    2.21    1.11   5
  -3 -12   2   10.84    3.69   7
   3  12  -2    4.00    1.12   1
  -2 -12   2   19.45    3.76   7
  -2 -12   2   20.57    2.85   4
   2  12  -2   18.56    2.21   5
   2  12  -2   21.86    2.54   1
  -2 -12   2   21.44    2.14   1
  -1 -12   2    5.00    1.99   4
  -1 -12   2    2.54    1.19   1
   0  12  -2   21.98    3.71   1
   0 -12   2   29.75    2.55   1
   0  12  -2   32.79    3.48   6
   0 -12   2   25.71    3.66   4
  -1  12  -2    2.59    1.91   6
   1 -12   2    1.92    2.10   4
   1 -12   2    5.70    1.92   1
   1 -12   2    3.43    1.25   5
   2 -12   2    6.06    1.49   5
   2 -12   2    8.53    3.31   4
  -2  12  -2    6.58    2.39   1
   3 -12   2    1.53    1.35   5
   3 -12   2    1.22    1.75   1
   3 -12   2    3.44    2.17   4
   4 -12   2    8.94    2.38   5
   4 -12   2    8.53    1.79   1
   4 -12   2    7.06    2.70   4
   5 -12   2    1.32    1.47   1
   5 -12   2    3.64    2.70   4
   5 -12   2    3.15    1.87   5
   6 -12   2    1.79    1.76   1
   6 -12   2    4.62    2.41   4
 -10 -11   2    0.25    1.42   1
 -10 -11   2   -3.30    2.23   7
  -9 -11   2    2.52    2.48   1
  -9 -11   2    1.50    2.46   7
   8  11  -2    4.49    2.84   1
  -8 -11   2    4.32    2.50   1
   8  11  -2    5.42    2.38   2
  -7 -11   2    1.02    1.87   1
  -7 -11   2    0.20    2.05   7
   7  11  -2   -1.77    1.19   2
   7  11  -2   -1.43    1.20   1
  -6 -11   2   33.06    4.11   1
  -6 -11   2   43.44    6.62   7
   6  11  -2   33.84   11.20   2
  -6 -11   2   33.92    4.29   4
  -5 -11   2    1.63    3.36   7
   5  11  -2    1.55    1.16   2
  -5 -11   2    2.83    1.59   4
  -5 -11   2    1.59    1.07   1
  -4 -11   2   75.12    6.70   1
  -4 -11   2   93.76    8.62   4
  -4 -11   2   83.01    7.54   1
  -4 -11   2   70.73    7.88   7
   4  11  -2   96.24    7.02   2
   4  11  -2   81.53    8.72   1
  -3 -11   2    0.81    1.92   4
  -3 -11   2   -0.54    1.16   1
  -3 -11   2    3.05    2.50   7
  -2 -11   2    4.24    1.61   4
  -2 -11   2    2.36    1.92   7
  -2 -11   2    1.97    0.89   1
   1  11  -2   77.74    6.96   5
  -1 -11   2   85.50    7.05   1
   1  11  -2   78.83    6.38   6
   1  11  -2   73.32   11.02   1
  -1 -11   2   80.49    7.57   1
  -1 -11   2   80.88    7.16   4
   0  11  -2    5.52    1.63   6
   0 -11   2    4.96    1.47   1
   0 -11   2    3.24    2.22   4
   0  11  -2    6.86    1.10   1
   1 -11   2   26.42    3.09   5
   1 -11   2   33.79    4.62   4
   1 -11   2   30.61    3.09   1
  -1  11  -2   32.09    3.33   1
   2 -11   2    1.72    0.89   5
  -2  11  -2    2.13    1.07   1
   2 -11   2    0.21    1.38   1
   3 -11   2   20.36    2.31   1
   3 -11   2   24.70    2.73   5
  -3  11  -2   19.63    3.15   1
  -4  11  -2    1.09    0.98   1
   4 -11   2   -0.80    1.18   1
   4 -11   2   -0.44    1.16   5
   4 -11   2    5.16    2.74   4
   5 -11   2   31.65    3.79   1
   5 -11   2   31.25    3.95   5
   5 -11   2   27.51    4.36   4
   6 -11   2   13.70    2.24   1
   6 -11   2   16.60    2.10   5
   7 -11   2    3.28    2.06   1
   7 -11   2    0.99    1.77   5
   7 -11   2    1.89    2.16   4
 -11 -10   2   29.35    5.24   7
 -11 -10   2   38.00    5.53   1
 -10 -10   2   37.23    5.17   7
  10  10  -2   31.19    4.19   1
  -9 -10   2   -1.30    1.20   1
   9  10  -2    0.52    1.88   1
  -9 -10   2    1.20    2.19   7
  -8 -10   2    9.58    2.52   1
  -8 -10   2    8.65    2.73   7
  -7 -10   2   12.41    3.11   7
   7  10  -2   11.60    2.00   1
  -7 -10   2   15.10    2.76   1
  -6 -10   2   12.96    1.69   1
  -6 -10   2   10.34    1.76   4
  -6 -10   2   12.01    2.85   7
   6  10  -2   12.37    1.96   1
   6  10  -2    7.93    3.03   2
  -5 -10   2    0.12    1.99   7
   5  10  -2    2.09    3.12   2
  -5 -10   2    1.17    1.21   1
   5  10  -2    1.16    1.87   1
  -5 -10   2    1.15    1.72   1
   4  10  -2   19.41    2.04   1
   4  10  -2   14.82    1.99   5
  -4 -10   2   19.96    3.04   7
   4  10  -2   16.77    2.17   2
  -4 -10   2   17.80    2.18   1
  -3 -10   2    1.21    0.99   1
  -3 -10   2   -0.20    0.90   1
  -3 -10   2    0.34    2.64   7
   3  10  -2    0.83    0.99   5
   3  10  -2    0.08    1.44   2
  -3 -10   2    3.72    1.60   4
   2  10  -2  110.37    9.49   1
  -2 -10   2   96.75    8.42   4
  -2 -10   2  113.21    8.84   1
   2  10  -2  104.98    9.07   5
  -2 -10   2   97.06    8.51   7
  -2 -10   2  103.82    7.54   1
   1  10  -2   23.20    2.48   5
   1  10  -2   31.12    2.93   6
  -1 -10   2   20.24    3.22   7
  -1 -10   2   27.55    2.25   1
   1  10  -2   23.42    2.95   1
  -1 -10   2   23.66    2.66   1
  -1 -10   2   30.85    3.46   4
   0  10  -2   44.29    4.59   1
   0 -10   2   48.96    3.84   1
   0 -10   2   34.04    5.15   4
   0  10  -2   39.81    3.24   6
   1 -10   2   73.95    5.43   5
   1 -10   2   89.24    6.19   1
  -1  10  -2   80.00    8.65   1
   1 -10   2   81.98    6.11   1
  -1  10  -2   84.39    6.74   6
   2 -10   2   21.38    3.18   1
   2 -10   2   30.24    3.89   4
   2 -10   2   27.09    3.66   1
  -2  10  -2   27.21    2.92   1
   2 -10   2   22.23    2.87   5
   3 -10   2   18.11    2.60   1
  -3  10  -2   22.00    3.02   1
   3 -10   2   24.29    3.44   4
   3 -10   2   19.42    2.63   1
   3 -10   2   16.73    2.30   5
   4 -10   2   22.16    2.51   1
  -4  10  -2   22.56    2.33   1
   4 -10   2   14.91    4.71   4
   5 -10   2   -0.22    1.72   1
  -5  10  -2   -1.25    1.40   1
   6 -10   2   16.59    2.33   1
   6 -10   2   10.49    2.22   5
   6 -10   2   12.80    3.05   4
  -6  10  -2   12.67    2.12   1
   7 -10   2   -0.62    1.81   1
   7 -10   2   -1.62    2.77   4
   8 -10   2    2.39    2.54   4
   8 -10   2    4.06    1.91   1
 -12  -9   2    2.80    2.52   1
 -11  -9   2   -1.11    1.55   1
 -11  -9   2   -0.20    1.93   7
  11   9  -2    2.96    2.54   1
 -10  -9   2   12.11    2.88   1
  10   9  -2   12.25    2.77   1
  -9  -9   2   83.84    6.83   1
  -9  -9   2   90.90    8.01   7
   9   9  -2   93.55    6.69   1
  -8  -9   2    2.75    2.72   7
   8   9  -2    4.94    1.68   1
  -7  -9   2    3.62    2.39   7
   7   9  -2    3.36    2.16   1
  -7  -9   2    1.05    1.39   1
  -7  -9   2    1.44    1.79   1
  -6  -9   2  176.30   12.74   4
  -6  -9   2  162.94   13.97   7
  -6  -9   2  179.11   12.69   1
   6   9  -2  184.50   15.09   1
   5   9  -2  122.81   26.36   2
  -5  -9   2  119.43    8.31   1
   5   9  -2  112.88    7.97   1
  -5  -9   2   99.19    9.74   4
  -5  -9   2   99.24    8.35   7
  -5  -9   2  116.62    8.00   1
   4   9  -2   -1.82    1.73   2
  -4  -9   2   -0.54    1.97   7
   4   9  -2   -1.12    1.59   1
   4   9  -2   -0.23    1.03   5
  -4  -9   2    1.33    1.54   1
  -4  -9   2   -0.47    0.94   1
   3   9  -2    1.01    1.28   1
  -3  -9   2   -1.17    1.06   1
  -3  -9   2    0.20    0.58   1
  -3  -9   2    0.31    2.47   7
   3   9  -2    0.17    1.29   2
   3   9  -2    1.95    0.94   5
  -2  -9   2  120.56   10.66   7
  -2  -9   2  137.93   11.00   4
   2   9  -2  153.62   11.62   2
  -2  -9   2  128.72    8.11   1
   2   9  -2  133.70   10.34   1
   2   9  -2  131.54    9.62   5
  -2  -9   2  123.14    9.65   1
  -1  -9   2    8.90    1.96   4
   1   9  -2    6.98    1.24   5
  -1  -9   2    7.54    1.19   1
   1   9  -2   10.18    1.19   1
  -1  -9   2    7.69    1.38   1
   0  -9   2   26.64    3.36   4
   0  -9   2   28.92    2.54   1
   0   9  -2   29.96    2.54   1
   0  -9   2   36.00    2.98   5
   0   9  -2   30.86    2.84   6
   1  -9   2  639.79   40.27   1
   1  -9   2  623.87   36.19   5
   1  -9   2  562.63   45.70   1
  -1   9  -2  532.38   42.34   1
   1  -9   2  655.30   46.44   4
   2  -9   2   21.31    3.83   4
   2  -9   2   16.92    2.00   1
   2  -9   2   23.32    2.01   5
  -2   9  -2   20.48    2.24   1
   2  -9   2   17.77    2.03   1
   3  -9   2    6.82    1.30   5
   3  -9   2    9.84    3.10   4
   3  -9   2    9.04    1.73   1
  -3   9  -2    7.30    1.53   1
   4  -9   2  125.27    9.31   5
   4  -9   2  125.64    9.05   1
  -4   9  -2  128.77   11.25   1
   4  -9   2  136.85   11.56   4
   4  -9   2  128.92    9.59   1
   5  -9   2   10.36    1.69   5
  -5   9  -2   12.99    2.25   1
   5  -9   2   15.59    3.49   4
   5  -9   2   16.95    3.02   1
  -6   9  -2    1.50    1.32   1
   6  -9   2    1.80    1.04   5
   6  -9   2    0.71    2.05   4
   6  -9   2    1.97    1.32   1
   7  -9   2   13.01    1.96   5
  -7   9  -2    9.39    1.96   1
   7  -9   2   11.07    2.22   1
   7  -9   2   13.28    2.73   4
   8  -9   2    4.60    2.45   4
  -8   9  -2    1.75    1.42   1
   8  -9   2    2.35    1.76   1
   9  -9   2    5.44    1.80   5
   9  -9   2    2.38    2.10   4
   9  -9   2    4.84    2.74   1
  12   8  -2   97.41   14.96   1
 -12  -8   2  128.47   13.75   1
 -11  -8   2    5.58    2.36   1
  11   8  -2    1.38    1.68   1
  10   8  -2    0.31    2.05   1
 -10  -8   2    1.27    0.98   3
 -10  -8   2    3.27    1.60   1
   9   8  -2    7.10    1.92   1
   8   8  -2  523.94   41.61   1
  -8  -8   2  527.17   39.83   7
  -8  -8   2  506.52   35.30   3
  -7  -8   2  580.74   36.88   1
  -7  -8   2  531.98   40.95   7
  -7  -8   2  544.35   37.47   1
  -7  -8   2  528.18   32.54   3
   7   8  -2  533.58   36.98   1
   6   8  -2  178.90   16.23   1
  -6  -8   2  221.41   16.25   7
  -6  -8   2  209.43   16.11   1
  -5  -8   2  718.28   59.60   7
   5   8  -2  770.52   50.40   1
  -5  -8   2  713.07   56.30   4
   5   8  -2  741.35   70.12   3
  -5  -8   2  774.68   53.82   1
   4   8  -2   25.22    2.54   1
   4   8  -2   22.76    6.03   2
  -4  -8   2   16.11    2.49   4
  -4  -8   2   16.82    2.90   7
   4   8  -2   22.48    2.27   3
  -4  -8   2   19.55    2.51   1
  -4  -8   2   20.20    2.48   1
  -3  -8   2   36.96    4.69   7
   3   8  -2   46.05   10.70   1
   3   8  -2   30.22    3.12   5
  -3  -8   2   35.61    2.89   1
  -3  -8   2   38.42    3.92   4
  -3  -8   2   32.74    2.90   6
   3   8  -2   34.63    2.99   3
   3   8  -2   38.20    2.95   1
   3   8  -2   36.73    8.60   2
   2   8  -2   11.03    1.28   1
  -2  -8   2   13.04    1.52   1
   2   8  -2    9.25    1.40   1
  -2  -8   2   11.02    1.62   4
  -2  -8   2   16.04    3.33   7
   1   8  -2   64.49    5.07   5
  -1  -8   2   68.20    5.53   1
  -1  -8   2   78.74    5.76   1
   1   8  -2   73.78    5.73   6
  -1  -8   2   86.71    8.04   7
   1   8  -2   60.29    5.44   1
   1   8  -2   67.04    5.78   1
  -1  -8   2   70.67    6.96   4
   0  -8   2   -1.57    1.61   4
   0  -8   2   -0.33    0.94   1
   0   8  -2    0.56    0.76   1
   0  -8   2    0.49    0.97   1
   0   8  -2    0.67    0.77   6
   0   8  -2   -0.15    0.84   1
   0  -8   2    0.63    0.73   5
   0   8  -2    1.12    0.62   5
   1  -8   2    1.50    1.00   5
  -1   8  -2    0.64    0.73   1
  -1   8  -2   -0.17    0.53   1
   1  -8   2   -0.12    0.76   1
   1  -8   2    0.40    1.49   4
   2  -8   2   41.11    3.64   1
   2  -8   2   31.62    2.87   1
  -2   8  -2   35.63    2.72   1
   2  -8   2   26.92    3.15   4
   2  -8   2   33.23    3.05   5
   3  -8   2    8.61    1.58   5
   3  -8   2    5.88    1.37   1
  -3   8  -2    8.45    1.50   1
  -4   8  -2    3.30    1.26   1
   4  -8   2    6.05    1.79   1
   4  -8   2    4.41    1.93   5
   4  -8   2    0.83    2.84   4
  -5   8  -2    1.33    1.00   1
   5  -8   2    4.00    1.63   5
   5  -8   2    1.72    2.03   4
  -6   8  -2   30.74    4.07   1
   6  -8   2   35.10    3.58   1
   6  -8   2   36.70    4.25   5
   7  -8   2   12.46    2.47   1
   8  -8   2   -1.36    1.60   1
   9  -8   2   11.12    2.57   4
   9  -8   2    7.08    2.45   1
 -12  -7   2   12.64    2.53   1
  12   7  -2    9.65    3.10   1
  11   7  -2    1.27    1.64   1
 -10  -7   2    6.19    2.33   1
  10   7  -2    5.02    1.82   1
 -10  -7   2    4.75    1.51   3
   9   7  -2    1.80    2.32   1
  -9  -7   2    6.56    1.54   3
  -9  -7   2    3.82    1.77   1
  -8  -7   2   20.33    2.42   3
   8   7  -2   21.60    2.61   1
   7   7  -2   62.82    4.97   1
  -7  -7   2   64.44    5.90   1
  -7  -7   2   60.97    4.20   3
  -6  -7   2   41.84    5.72   7
  -6  -7   2   47.91    3.49   3
  -6  -7   2   39.11    3.59   1
   6   7  -2   38.87    3.61   3
   6   7  -2   46.12    3.55   1
  -5  -7   2    0.90    1.18   1
  -5  -7   2    3.16    0.91   4
   5   7  -2    4.23    1.04   3
  -5  -7   2    0.38    1.48   7
  -5  -7   2    2.59    1.13   1
   5   7  -2    1.64    1.24   1
   4   7  -2   46.46    4.40   1
   4   7  -2   62.30    4.84   1
  -4  -7   2   63.62    5.16   4
  -4  -7   2   49.22    5.39   7
   4   7  -2   51.36    4.55   3
  -4  -7   2   58.73    4.74   6
  -4  -7   2   54.03    3.76   1
  -3  -7   2    1.84    1.34   4
  -3  -7   2    2.49    1.27   6
  -3  -7   2    2.18    0.94   1
   3   7  -2    0.93    1.05   3
   3   7  -2   -0.13    1.59   1
   3   7  -2    1.68    0.74   1
  -3  -7   2   -0.87    1.90   7
  -3  -7   2    0.41    0.60   1
   3   7  -2    0.88    0.98   2
   2   7  -2   30.64    5.11   2
  -2  -7   2   32.80    4.61   4
  -2  -7   2   32.08    2.66   1
   2   7  -2   24.74    3.38   3
   2   7  -2   28.03    2.28   1
  -2  -7   2   29.70    2.45   1
   2   7  -2   33.98    2.61   1
   2   7  -2   34.94    2.67   5
  -1  -7   2   59.21    4.31   1
   1   7  -2   62.33    5.08   7
   1   7  -2   63.01    6.30   3
   1   7  -2   54.93    4.99   6
   1   7  -2   58.97    4.00   5
  -1  -7   2   61.15    6.48   4
   1   7  -2   59.78    4.96   2
  -1  -7   2   52.90    5.65   7
  -1  -7   2   55.95    4.05   1
   1   7  -2   56.50    3.81   1
   0   7  -2   27.97    2.20   1
   0  -7   2   24.85    2.30   5
   0  -7   2   27.52    2.70   1
   0  -7   2   32.38    2.54   1
   0   7  -2   30.07    4.00   7
   0   7  -2   26.05    2.84   1
   0   7  -2   31.30    2.56   6
   0  -7   2   26.51    3.22   4
   0   7  -2   23.95    2.30   5
   1  -7   2   61.69    4.47   1
  -1   7  -2   55.98    5.74   7
   1  -7   2   62.32    4.68   5
  -1   7  -2   56.83    4.45   1
   1  -7   2   54.05    5.42   1
   1  -7   2   56.39    8.50   4
  -1   7  -2   66.65    4.24   1
  -2   7  -2   10.64    1.37   1
   2  -7   2   10.83    1.52   1
   2  -7   2   14.41    2.09   1
   2  -7   2    5.17    2.93   4
  -2   7  -2   11.25    1.62   1
  -3   7  -2  266.06   20.43   1
   3  -7   2  254.94   19.03   1
   3  -7   2  261.78   18.71   5
   3  -7   2  250.33   17.59   1
   3  -7   2  274.26   19.79   4
   4  -7   2  270.96   21.97   4
   4  -7   2  237.63   21.51   1
  -4   7  -2  276.51   18.52   1
   4  -7   2  280.60   24.72   1
   4  -7   2  277.01   19.40   5
   5  -7   2   16.17    2.59   4
  -5   7  -2   19.64    2.49   1
   5  -7   2   23.29    2.87   1
   6  -7   2   13.08    3.73   1
  -6   7  -2   14.41    2.46   1
  -7   7  -2   31.60    3.92   1
   7  -7   2   39.26    5.28   4
  -8   7  -2    4.35    2.15   1
   8  -7   2    4.82    2.99   4
   9  -7   2    5.12    2.18   4
   9  -7   2    7.05    2.25   1
 -10   7  -2    9.43    2.64   1
  10  -7   2   10.55    2.74   4
  12   6  -2    7.82    3.27   1
 -12  -6   2    5.48    2.86   1
  11   6  -2    3.43    1.93   1
 -11  -6   2    1.21    1.75   1
 -11  -6   2   -0.45    0.99   3
 -10  -6   2    4.65    1.38   3
  -9  -6   2   -0.22    0.87   3
   9   6  -2    0.43    1.52   1
  -8  -6   2  178.58   12.54   3
   8   6  -2  171.60   13.69   1
  -8  -6   2  172.95   13.70   1
  -7  -6   2    2.30    1.65   1
   7   6  -2    3.42    1.27   1
  -6  -6   2   15.55    1.83   1
   6   6  -2   14.01    2.41   1
  -6  -6   2   13.31    1.84   3
  -6  -6   2   13.70    1.67   1
  -5  -6   2   24.07    2.31   1
  -5  -6   2   19.33    2.47   7
   5   6  -2   19.73    2.55   1
  -5  -6   2   23.61    2.39   1
  -5  -6   2   19.16    2.36   3
   5   6  -2   22.92    2.19   3
   4   6  -2  147.60   10.22   1
  -4  -6   2  135.65   11.42   1
   4   6  -2  171.22   12.62   1
  -4  -6   2  160.73   11.61   1
   4   6  -2  168.27   12.76   3
  -4  -6   2  174.12   12.84   7
  -4  -6   2  167.30   13.49   4
  -4  -6   2  157.60   13.09   6
  -4  -6   2  166.88   10.94   3
   3   6  -2    5.29    0.76   1
  -3  -6   2    6.68    1.91   7
   3   6  -2    4.10    1.19   1
  -3  -6   2    4.59    1.29   6
  -3  -6   2    7.51    1.61   4
  -3  -6   2    4.97    1.00   1
   3   6  -2    2.89    1.27   3
  -2  -6   2 1536.07  112.95   7
   2   6  -2 1452.36  250.17   2
   2   6  -2 1442.24   95.12   5
  -2  -6   2 1608.69   99.78   1
   2   6  -2 1624.38  460.60   1
   2   6  -2 1525.15  100.37   1
   2   6  -2 1462.87  114.92   3
  -2  -6   2 1566.29  102.45   1
   2   6  -2 1403.21  130.34   7
  -2  -6   2 1862.42  384.52   4
  -1  -6   2  209.97   16.54   7
  -1  -6   2  237.79   15.60   1
   1   6  -2  227.13   14.26   6
  -1  -6   2  237.58   13.84   1
   1   6  -2  227.37   15.29   5
   1   6  -2  214.03   16.15   7
   1   6  -2  236.03   15.85   1
   1   6  -2  261.00   16.34   1
  -1  -6   2  275.20   44.93   4
   1   6  -2  211.33   14.42   2
   1   6  -2  242.67   20.45   3
   0   6  -2  106.07    7.20   1
   0   6  -2  107.18    9.15   1
   0  -6   2  112.73    7.19   1
   0  -6   2  133.36   16.33   4
   0  -6   2  109.61    7.47   5
   0  -6   2  112.74    7.74   1
   0   6  -2  117.73    8.66   5
   0   6  -2  110.51   10.00   7
   0  -6   2  113.57    7.40   7
   1  -6   2   32.72    2.26   1
   1  -6   2   33.84    6.45   4
  -1   6  -2   34.81    3.21   7
   1  -6   2   30.46    2.44   5
  -1   6  -2   26.04    2.37   1
   1  -6   2   31.51    2.38   1
  -1   6  -2   32.47    2.42   1
   2  -6   2   24.65    2.61   1
  -2   6  -2   33.87    3.14   1
   2  -6   2   29.80    3.33   4
   2  -6   2   29.51    2.97   2
  -2   6  -2   33.81    2.50   1
   2  -6   2   34.50    2.62   1
   3  -6   2   27.78    3.65   4
   3  -6   2   30.04    3.25   1
   3  -6   2   31.92    3.03   5
   3  -6   2   26.87    2.27   1
  -3   6  -2   28.62    3.18   1
  -3   6  -2   28.66    2.47   1
   4  -6   2   -1.68    1.33   1
  -4   6  -2   -0.95    1.14   1
   4  -6   2    1.45    1.47   4
   5  -6   2  227.38   15.67   4
  -5   6  -2  217.87   16.04   1
   5  -6   2  233.99   14.70   1
   5  -6   2  211.41   42.10   1
   6  -6   2   -1.84    1.11   1
   6  -6   2   -1.48    1.54   4
  -6   6  -2    0.88    1.43   1
  -7   6  -2   22.80    3.50   1
   7  -6   2   29.83    4.45   4
   7  -6   2   29.23    3.19   1
   8  -6   2    4.80    1.98   1
   8  -6   2    6.68    2.56   4
   9  -6   2    2.92    1.76   4
   9  -6   2    5.34    1.90   1
  -9   6  -2    0.38    2.06   1
  10  -6   2   12.62    3.77   1
  10  -6   2    8.86    3.41   4
 -10   6  -2   16.05    3.93   1
  11  -6   2   -0.03    1.66   4
 -12  -5   2    3.09    3.11   1
  12   5  -2   -1.63    1.80   1
 -11  -5   2   77.19    7.50   1
 -11  -5   2   81.71    6.84   3
 -10  -5   2   17.29    2.79   3
  10   5  -2   14.85    3.32   1
 -10  -5   2   21.31    4.96   1
   9   5  -2   84.51    6.86   1
  -9  -5   2   99.57    7.74   1
  -9  -5   2   84.25    7.74   3
   8   5  -2    4.74    1.86   1
  -8  -5   2    7.12    1.81   3
   7   5  -2   40.60    3.39   1
  -7  -5   2   31.93    3.73   1
  -7  -5   2   37.55    3.11   3
  -7  -5   2   27.69    3.48   1
  -6  -5   2    3.78    1.03   1
  -6  -5   2    4.98    1.20   3
  -6  -5   2    3.17    1.78   1
   5   5  -2    3.90    1.05   1
   5   5  -2    2.46    1.47   1
  -5  -5   2    4.25    1.25   1
  -5  -5   2    5.44    1.13   1
  -5  -5   2    4.20    1.05   3
  -4  -5   2   16.11    2.77   7
   4   5  -2   15.70    1.85   3
   4   5  -2   13.24    1.87   1
  -4  -5   2   18.06    1.82   1
  -4  -5   2   17.32    1.90   1
  -4  -5   2   15.10    1.68   3
   3   5  -2    7.47    1.13   1
  -3  -5   2    7.03    1.29   4
  -3  -5   2    7.00    2.95   1
  -3  -5   2    7.93    1.17   1
  -3  -5   2    7.45    1.67   6
  -3  -5   2    5.72    2.19   7
   3   5  -2    6.26    1.08   1
  -3  -5   2   10.56    1.95   3
   3   5  -2    8.19    1.35   3
  -2  -5   2  175.17   13.44   7
   2   5  -2  172.75   13.44   1
  -2  -5   2  181.74   12.17   1
  -2  -5   2  185.72   11.48   1
   2   5  -2  186.53   11.54   7
  -2  -5   2  170.49   14.19   6
   2   5  -2  181.56   13.62   3
  -2  -5   2  176.05   14.98   4
   2   5  -2  185.12   11.68   1
   1   5  -2  111.78   17.00   2
   1   5  -2  102.19    7.24   1
  -1  -5   2  115.08   15.31   4
   1   5  -2   96.74    6.59   5
   1   5  -2   92.93    7.84   7
  -1  -5   2   94.12    8.01   7
   1   5  -2  114.87   11.11   3
   1   5  -2   96.83    7.10   6
   1   5  -2   90.93    7.05   1
  -1  -5   2   88.81    6.21   1
   0   5  -2   32.88    2.71   1
   0   5  -2   31.46    2.51   5
   0  -5   2   44.71    7.60   4
   0  -5   2   36.94    3.67   7
   0  -5   2   36.66    3.32   1
   0   5  -2   37.98    2.62   1
   0   5  -2   42.36    3.49   2
   0   5  -2   41.09    3.46   7
   1  -5   2  102.48   21.00   4
   1  -5   2   90.41    9.12   2
   1  -5   2   87.02    6.81   5
   1  -5   2   90.23    5.74   1
   1  -5   2   89.12    6.09   1
  -1   5  -2   95.07    6.26   1
  -1   5  -2   88.47    7.27   7
   2  -5   2   47.76    4.99   4
   2  -5   2   45.54    3.34   5
  -2   5  -2   41.03    3.20   1
   2  -5   2   36.71    3.92   2
   2  -5   2   43.53    3.34   1
  -2   5  -2   49.59    3.52   1
   2  -5   2   50.45    5.08   1
   3  -5   2   89.04    5.51   1
  -3   5  -2   89.56    7.17   1
   3  -5   2   77.89    7.06   4
   3  -5   2   96.08    6.40   1
  -3   5  -2   93.23    6.62   1
   4  -5   2   98.92    9.31   1
  -4   5  -2  108.74    9.73   1
   4  -5   2  126.11    8.98   4
   4  -5   2  131.07    8.73   1
  -5   5  -2    5.64    1.19   1
   5  -5   2    7.39    1.24   1
   5  -5   2    4.58    1.52   4
   5  -5   2    6.70    2.04   1
   6  -5   2   73.02    6.95   1
   6  -5   2   88.66    6.51   1
   6  -5   2   78.84    7.05   4
  -6   5  -2   86.37    6.50   1
   7  -5   2  245.68   17.17   1
  -7   5  -2  248.46   17.04   1
   7  -5   2  256.83   17.19   4
   8  -5   2   22.05    3.57   4
  -8   5  -2   26.85    4.02   1
   9  -5   2   54.35    5.68   1
  -9   5  -2   53.47    6.55   1
   9  -5   2   38.26    5.56   4
  10  -5   2    9.45    2.71   4
 -10   5  -2   10.74    2.77   1
  11  -5   2   25.90    5.33   1
 -11   5  -2   22.72    3.89   1
  11  -5   2   22.28    3.29   4
  13   4  -2   -2.87    2.20   1
 -12  -4   2   13.11    2.77   1
  12   4  -2   11.33    3.36   1
 -11  -4   2   21.97    3.04   1
 -11  -4   2   16.04    2.46   3
 -10  -4   2    2.92    1.50   1
  10   4  -2   -2.21    1.42   1
 -10  -4   2    0.15    1.31   3
   9   4  -2    4.73    1.91   1
  -8  -4   2    7.57    1.68   3
   8   4  -2    9.67    1.82   1
  -7  -4   2    5.76    1.34   3
  -7  -4   2    7.79    1.35   1
   6   4  -2  185.98   16.98   1
  -6  -4   2  193.63   14.15   1
  -6  -4   2  213.93   14.81   3
   5   4  -2   22.11    2.06   1
  -5  -4   2   20.18    1.87   1
  -5  -4   2   18.62    2.07   1
  -5  -4   2   18.13    1.62   3
   5   4  -2   18.37    2.01   1
   4   4  -2  103.30    7.25   3
  -4  -4   2  109.51    7.20   1
  -4  -4   2  109.64    7.48   3
   4   4  -2   94.77    6.69   1
   4   4  -2  108.94    7.20   1
   4   4  -2  105.77    8.52   4
  -4  -4   2  103.30    8.37   1
  -3  -4   2    1.65    1.08   6
  -3  -4   2    0.84    0.99   1
  -3  -4   2   -0.73    0.89   3
  -3  -4   2    3.62    1.73   7
   3   4  -2    0.49    0.95   1
   3   4  -2    0.52    0.50   1
  -3  -4   2    0.24    0.60   1
   3   4  -2    0.55    0.83   3
  -2  -4   2  157.60   15.30   7
   2   4  -2  153.28   27.21   4
  -2  -4   2  141.37   11.80   4
   2   4  -2  148.02    8.84   1
  -2  -4   2  148.13   10.49   1
  -2  -4   2  153.88    9.94   1
  -2  -4   2  153.87   10.39   3
   2   4  -2  149.66    9.60   3
  -2  -4   2  133.71   10.90   6
   2   4  -2  158.67    9.74   1
  -1  -4   2   90.68    7.11   7
   1   4  -2   83.14    5.79   1
   1   4  -2   88.84    5.98   1
   1   4  -2   87.86    6.85   3
  -1  -4   2  107.49   12.11   4
   1   4  -2   97.82   14.48   4
   1   4  -2   88.95    6.21   5
   1   4  -2   91.27   15.61   2
   1   4  -2   82.25    6.48   6
   1   4  -2   85.19    7.04   7
  -1  -4   2   77.95    5.53   1
   0  -4   2  150.82   10.73   7
   0   4  -2  166.33   10.06   1
   0   4  -2  149.29   11.17   1
   0   4  -2  157.45   11.26   7
   0  -4   2  149.79   10.34   5
   0   4  -2  206.40   33.28   4
   0   4  -2  147.73    9.83   5
   0   4  -2  184.34   14.45   2
   0  -4   2  163.02   10.18   1
   1  -4   2    2.34    0.72   1
  -1   4  -2    1.48    0.59   1
   1  -4   2    3.70    1.33   4
   1  -4   2    0.37    0.70   1
   1  -4   2    2.03    0.88   5
   1  -4   2    1.32    0.89   2
   2  -4   2   67.74   10.52   4
   2  -4   2   64.45    4.48   1
   2  -4   2   70.15    5.10   5
   2  -4   2   69.32    5.92   1
  -2   4  -2   68.35    5.02   1
  -2   4  -2   66.61    4.62   1
   3  -4   2  300.11   19.65   1
  -3   4  -2  306.36   21.06   1
   3  -4   2  325.59   56.94   4
   3  -4   2  300.72   19.82   1
  -3   4  -2  321.48   20.41   1
   4  -4   2   14.83    2.20   1
  -4   4  -2   16.24    1.84   1
   4  -4   2   16.72    1.60   1
  -4   4  -2   15.81    2.56   1
   5  -4   2    1.60    1.74   4
  -5   4  -2    0.28    0.78   1
   5  -4   2    0.37    1.81   1
   5  -4   2    1.08    0.78   1
   6  -4   2  158.62   14.41   1
   6  -4   2  179.17   10.66   1
   6  -4   2  164.64   13.11   4
  -6   4  -2  173.76   12.59   1
   7  -4   2  206.06   14.63   1
   7  -4   2  182.96   14.71   4
  -7   4  -2  199.71   13.95   1
   8  -4   2    4.56    2.60   4
  -8   4  -2    0.24    1.19   1
   8  -4   2    0.29    1.30   1
   9  -4   2    0.72    2.43   4
   9  -4   2   -0.65    1.91   1
  10  -4   2   18.43    3.39   1
  10  -4   2   14.34    2.34   4
 -10   4  -2   12.40    2.51   1
  11  -4   2   22.37    3.30   4
 -11   4  -2   29.17    4.66   1
  13   3  -2   11.49    3.00   1
  12   3  -2   10.20    2.67   1
 -11  -3   2   -0.55    1.63   3
  11   3  -2   -2.04    1.60   1
 -10  -3   2   10.69    1.80   3
  -9  -3   2   25.07    2.83   3
   8   3  -2    9.49    0.67   4
   8   3  -2    8.51    0.62   4
  -7  -3   2   14.30    1.93   3
   7   3  -2   11.43    0.86   4
  -6  -3   2   18.69    5.94   1
   6   3  -2   17.41    1.36   4
  -6  -3   2   19.61    2.34   3
   6   3  -2   23.42    3.00   1
  -6  -3   2   19.88    2.30   1
  -5  -3   2   22.69    2.18   1
   5   3  -2   20.64    1.88   4
   5   3  -2   18.83    2.91   1
   5   3  -2   21.09    2.23   1
  -5  -3   2   27.36    2.65   1
  -5  -3   2   24.98    2.28   3
  -4  -3   2   12.87    1.75   3
   4   3  -2   15.02    1.54   1
   4   3  -2   13.49    1.17   4
  -4  -3   2   15.21    1.63   1
   4   3  -2   14.77    1.97   1
   3   3  -2   19.19    1.93   1
  -3  -3   2   18.34    1.84   3
  -3  -3   2   19.83    1.87   1
   3   3  -2   17.15    1.39   4
   3   3  -2   17.30    1.69   1
  -2  -3   2  120.67    9.11   4
   2   3  -2  124.76    8.84   3
  -2  -3   2  129.45    8.62   1
   2   3  -2  138.13   10.75   4
  -2  -3   2  126.09    9.12   3
  -2  -3   2  123.22    8.98   1
   2   3  -2  129.30    7.34   1
   2   3  -2  123.12    8.76   1
  -2  -3   2  127.26    9.09   7
  -2  -3   2  121.86    9.38   6
   1   3  -2 1167.17   76.11   1
   1   3  -2 1498.98  232.56   4
  -1  -3   2 1030.87   73.88   3
   1   3  -2 1308.36  115.30   3
  -1  -3   2 1048.14   80.32   7
   1   3  -2 1040.09   68.55   5
   1   3  -2 1034.51   85.06   6
  -1  -3   2  978.35   82.03   6
  -1  -3   2 1140.34   70.29   1
   1   3  -2 1074.48   70.74   7
   1   3  -2 1038.06   69.34   1
   0   3  -2   13.16    1.30   5
   0   3  -2   10.40    2.35   7
   0  -3   2   12.02    2.31   7
   0   3  -2   14.32    1.87   4
   0  -3   2   12.10    1.03   1
   0  -3   2   13.71    1.86   4
   0   3  -2   12.83    1.01   1
   0  -3   2   11.50    1.41   5
   0   3  -2   15.14    3.26   2
   1  -3   2  119.64   11.95   1
   1  -3   2  132.61    9.08   1
  -1   3  -2  117.83    7.98   1
   1  -3   2  128.36    9.34   5
  -1   3  -2  163.15   27.09   4
  -1   3  -2  123.49    7.69   1
   1  -3   2  129.92   13.95   2
   1  -3   2  160.60   17.19   4
   2  -3   2    2.00    0.70   1
   2  -3   2    1.39    0.58   1
   2  -3   2    3.14    1.32   4
  -3   3  -2    1.33    0.69   1
   3  -3   2    1.55    1.09   1
   3  -3   2    0.01    0.59   1
  -3   3  -2    1.67    0.72   1
  -4   3  -2  275.49   17.14   1
   4  -3   2  282.46   17.57   1
   4  -3   2  281.07   17.70   1
   4  -3   2  262.48   18.34   4
  -4   3  -2  265.88   20.02   1
   5  -3   2  111.23    8.91   4
  -5   3  -2  110.49    8.47   1
   5  -3   2   98.06    8.19   1
   5  -3   2  101.45    7.50   1
  -6   3  -2   13.97    2.75   1
   6  -3   2   17.15    2.63   1
   6  -3   2   18.36    2.14   1
   6  -3   2   18.21    2.70   4
   7  -3   2   10.07    1.81   4
   7  -3   2   14.18    2.07   1
  -7   3  -2   17.77    3.64   1
  -8   3  -2   69.30    5.83   1
   8  -3   2   68.40    6.43   1
   8  -3   2   75.01    5.56   4
   9  -3   2    0.36    1.64   1
  -9   3  -2    1.64    1.96   1
   9  -3   2    0.04    1.27   4
 -10   3  -2   48.63    5.77   1
  10  -3   2   55.19    4.41   4
  11  -3   2    7.23    2.42   4
 -11   3  -2    5.24    2.03   1
 -12   3  -2   -1.17    2.72   1
  12   2  -2    3.95    2.63   1
 -11  -2   2    3.44    2.54   1
  11   2  -2    1.22    2.28   1
 -10  -2   2    1.80    1.41   3
 -10  -2   2    1.89    1.44   1
  -9  -2   2   34.50    3.51   3
   9   2  -2   41.59    3.10   4
   8   2  -2   18.49    2.46   1
   8   2  -2   24.55    2.13   4
  -8  -2   2   23.82    2.90   1
   7   2  -2   11.67    1.93   1
   7   2  -2   15.14    1.29   4
  -6  -2   2  189.34   12.82   1
  -6  -2   2  181.26   13.66   1
   6   2  -2  199.63   13.58   1
   5   2  -2  382.54   23.33   1
  -5  -2   2  400.57   27.32   1
  -5  -2   2  352.04   23.52   1
  -4  -2   2 1159.29   79.97   3
  -4  -2   2 1253.13   79.88   1
  -4  -2   2 1103.74   84.62   1
   4   2  -2 1278.54   81.60   1
   4   2  -2 1235.90   82.84   1
   3   2  -2  119.49    8.14   1
  -3  -2   2  106.59    6.98   1
   3   2  -2  109.50    6.69   1
  -3  -2   2  105.30    8.77   1
  -3  -2   2  100.64    6.70   3
  -2  -2   2  344.51   24.09   1
   2   2  -2  356.78   23.95   1
   2   2  -2  333.23   21.61   3
   2   2  -2  372.01   22.51   1
  -2  -2   2  337.38   24.65   1
  -2  -2   2  332.60   22.57   3
   2   2  -2  349.70   30.38   4
  -1  -2   2    3.37    0.81   4
   1   2  -2    2.26    0.87   6
  -1  -2   2    2.86    0.47   1
   1   2  -2    2.47    0.33   1
   1   2  -2    2.36    0.49   1
  -1  -2   2    4.01    1.00   6
  -1  -2   2    2.87    0.74   3
   1   2  -2    3.17    0.83   3
   1   2  -2    3.54    0.78   4
  -1  -2   2    1.47    0.93   7
   0   2  -2  252.20   20.47   3
   0  -2   2  198.15   14.21   5
   0   2  -2  217.55   16.12   7
   0   2  -2  210.70   13.67   1
   0  -2   2  221.09   14.02   1
   0  -2   2  206.66   13.83   7
   0   2  -2  214.37   14.41   5
   0   2  -2  226.72   19.17   1
   0   2  -2  235.36   49.84   2
  -1   2  -2  573.79   40.01   1
   1  -2   2  585.84   50.69   2
  -1   2  -2  484.10   36.80   1
   1  -2   2  547.35   40.70   5
   1  -2   2  569.16   37.90   1
   1  -2   2  756.55  116.18   4
   1  -2   2  556.63   34.39   1
  -1   2  -2  763.30  110.63   4
  -2   2  -2    2.58    0.62   1
   2  -2   2    0.74    1.42   4
  -2   2  -2    2.96    0.59   1
   2  -2   2    4.44    0.84   1
   2  -2   2    3.07    0.66   1
   3  -2   2  278.29   18.87   1
   3  -2   2  300.85   22.47   1
  -3   2  -2  293.69   18.23   1
  -3   2  -2  317.91   18.89   1
   3  -2   2  273.89   20.93   4
   4  -2   2  111.33    8.38   4
  -4   2  -2  109.35    8.69   1
   4  -2   2   94.80    8.06   1
   4  -2   2  120.31    7.76   1
  -4   2  -2  111.38    8.76   1
  -5   2  -2  310.96   26.08   1
  -5   2  -2  388.90   21.45   1
   5  -2   2  391.61   21.82   1
   5  -2   2  364.14   25.93   4
   5  -2   2  307.39   26.92   1
  -6   2  -2  145.89    8.89   1
   6  -2   2  139.37   11.26   1
   6  -2   2  124.16    9.18   4
   6  -2   2  131.19   10.55   1
   7  -2   2    2.67    1.11   4
   7  -2   2    0.42    1.76   1
  -7   2  -2    1.21    1.51   1
   8  -2   2  251.64   19.40   1
  -8   2  -2  265.95   18.12   1
   8  -2   2  293.51   19.33   4
  -9   2  -2   15.61    2.80   1
   9  -2   2   17.09    2.43   4
   9  -2   2   18.47    3.85   1
 -10   2  -2   27.53    3.80   1
  10  -2   2   30.69    4.56   1
  10  -2   2   23.35    3.28   4
  11  -2   2    2.77    2.25   1
 -11   2  -2    4.54    2.48   1
 -12   2  -2    3.77    2.03   1
  12   1  -2   16.69    3.32   1
 -12  -1   2   14.72    3.35   1
 -11  -1   2    3.56    2.12   1
  10   1  -2    6.72    1.00   4
  10   1  -2    5.80    2.08   1
   9   1  -2   27.07    2.54   4
  -9  -1   2   21.65    3.33   1
   9   1  -2   28.35    3.28   1
  -8  -1   2    0.62    1.17   1
   8   1  -2   -0.61    1.37   1
  -7  -1   2    9.00    2.00   1
   7   1  -2    6.26    1.46   1
  -6  -1   2  886.73   69.01   1
  -6  -1   2  834.76   68.33   1
   6   1  -2  887.49   55.39   1
   5   1  -2   28.05    2.90   1
  -5  -1   2   26.78    3.35   1
   5   1  -2   20.95    3.06   1
  -5  -1   2   24.91    2.47   1
   4   1  -2    7.95    1.21   1
   4   1  -2    6.99    1.64   1
  -3  -1   2   20.71    2.34   1
   3   1  -2   21.69    1.96   1
  -3  -1   2   24.13    2.19   1
   3   1  -2   23.14    1.97   1
  -2  -1   2  119.67    8.02   1
   2   1  -2  116.78    7.55   1
   2   1  -2  116.44    8.09   1
  -2  -1   2  103.80    7.58   1
   1   1  -2  114.19    9.08   1
   1   1  -2  110.65    7.43   3
  -1  -1   2  104.92    8.24   3
  -1  -1   2  109.49    7.70   1
  -1  -1   2  109.49    6.98   1
  -1  -1   2  123.66    8.70   6
   1   1  -2  110.20    7.73   1
  -1   1  -2    4.52    0.70   4
   1  -1   2    4.52    0.65   1
  -1   1  -2    5.43    0.64   1
  -1   1  -2    5.29    0.56   1
   1  -1   2    4.68    0.74   2
   1  -1   2    5.72    0.67   1
   1  -1   2    5.15    1.24   4
   2  -1   2  152.29   11.29   4
  -2   1  -2  116.15    9.88   1
   2  -1   2  123.92    8.58   1
  -2   1  -2  126.58   10.76   1
  -2   1  -2  144.37   10.85   4
   2  -1   2  120.49    9.79   1
  -3   1  -2    8.03    1.12   1
   3  -1   2    6.82    1.27   1
   3  -1   2    5.27    1.04   1
  -3   1  -2    6.44    0.87   1
   4  -1   2   12.75    2.62   1
   4  -1   2    7.96    1.58   1
   4  -1   2    8.30    1.05   4
  -4   1  -2   11.60    2.78   1
  -5   1  -2   19.29    2.36   1
   5  -1   2   22.69    2.17   1
  -5   1  -2   23.98    2.04   1
   5  -1   2   16.31    1.99   1
   5  -1   2   19.53    2.26   4
   6  -1   2  507.82   35.63   4
   6  -1   2  538.85   51.73   1
   6  -1   2  509.90   31.56   1
  -6   1  -2  537.85   33.43   1
   7  -1   2   34.97    2.83   4
  -7   1  -2   36.26    3.59   1
   7  -1   2   33.47    4.01   1
   8  -1   2  132.81   10.42   1
  -8   1  -2  149.57   10.41   1
   8  -1   2  139.51    9.94   4
  -9   1  -2  190.04   16.18   1
   9  -1   2  170.42   13.77   1
   9  -1   2  186.56   13.54   4
  10  -1   2   62.57    6.19   4
  10  -1   2   54.46    5.01   1
 -10   1  -2   65.56    6.23   1
  11  -1   2   29.05    4.81   1
 -11   1  -2   19.27    4.05   1
 -12   1  -2   29.62    5.83   1
  12   0  -2   26.91    4.39   1
 -12   0   2   28.49    4.18   1
  11   0  -2   11.61    3.14   1
 -10   0   2    0.73    1.53   1
  10   0  -2    4.60    1.13   4
   9   0  -2   57.57    6.99   4
   8   0  -2   31.53    2.60   4
  -8   0   2   36.15    4.05   1
   8   0  -2   34.78    3.32   1
  -7   0   2   45.26    3.88   1
   7   0  -2   47.21    4.11   1
   6   0  -2  137.34    9.27   1
  -6   0   2  148.53   10.41   1
  -6   0   2  123.91    9.61   1
   5   0  -2   44.19    3.97   1
  -5   0   2   51.03    4.03   1
   5   0  -2   47.93    4.41   1
  -5   0   2   48.66    4.19   1
  -4   0   2   -0.37    0.85   1
   4   0  -2    0.85    0.95   1
  -4   0   2   -0.27    0.61   1
   4   0  -2   -0.35    0.76   1
  -3   0   2 1881.21  126.57   1
  -3   0   2 2006.88  111.75   1
   3   0  -2 1820.53  117.24   1
   3   0  -2 1634.74  130.77   1
  -2   0   2  344.48   23.46   1
  -2   0   2  333.71   22.19   1
   2   0  -2  327.66   20.76   1
   2   0  -2  333.99   20.74   1
   1   0  -2  255.51   16.13   1
  -1   0   2  236.40   15.44   1
   1   0  -2  252.51   15.13   1
  -1   0   2  204.07   16.37   1
  -2   0  -2 1073.47   95.70   4
   2   0   2 1068.58   83.11   4
  -2   0  -2 1137.84   75.59   1
   2   0   2  931.73   68.86   1
   2   0   2 1139.20   67.01   1
  -2   0  -2  898.19   66.19   1
  -3   0  -2  243.28   20.16   4
  -3   0  -2  243.71   16.33   1
   3   0   2  235.55   16.04   1
  -3   0  -2  243.34   15.27   1
   3   0   2  237.59   17.53   4
   3   0   2  256.37   14.06   1
  -4   0  -2  342.75   26.02   1
   4   0   2  323.88   24.43   4
  -4   0  -2  374.01   21.24   1
   4   0   2  327.89   22.23   1
   4   0   2  358.28   23.20   1
   5   0   2    2.41    1.54   1
   5   0   2    4.07    1.07   1
  -5   0  -2    5.93    4.36   1
  -5   0  -2    6.87    1.61   1
   6   0   2 1129.57   74.44   4
   6   0   2 1235.64   76.61   1
  -6   0  -2 1216.67   75.37   1
   6   0   2 1217.54   74.17   1
   7   0   2   35.45    3.25   4
   7   0   2   32.93    3.66   1
   8   0   2   19.20    2.03   4
   8   0   2   14.81    3.33   1
  -8   0  -2   14.10    5.56   1
  -9   0  -2    0.58    1.33   1
   9   0   2   -0.38    0.71   4
   9   0   2    1.24    1.60   1
  10   0   2   23.35    3.72   1
 -10   0  -2   16.40    2.52   1
 -11   0  -2    2.43    2.13   1
  11   0   2   -1.60    1.96   1
  12   0   2    6.83    3.04   1
  12  -1  -2   11.15    3.41   1
  11  -1  -2   -1.21    1.80   1
 -11   1   2   -0.78    1.83   1
   9  -1  -2    2.70    1.05   4
   9  -1  -2    1.68    1.64   1
  -7   1   2   -2.09    1.24   1
   7  -1  -2    1.61    1.26   1
   6  -1  -2  198.62   11.57   1
  -6   1   2  175.84   11.99   1
   5  -1  -2  204.94   16.57   1
  -5   1   2  220.05   14.25   1
   5  -1  -2  231.35   14.32   1
  -5   1   2  237.48   14.64   1
  -4   1   2   92.23   13.93   1
   4  -1  -2   95.39    6.54   1
   4  -1  -2  108.16    8.36   1
  -4   1   2  100.60    8.10   1
  -3   1   2  403.16   22.75   1
   3  -1  -2  381.25   22.74   1
   3  -1  -2  309.87   24.37   1
  -2   1   2   -0.38    0.66   1
   2  -1  -2    0.62    0.79   1
  -2   1   2   -0.19    0.62   1
   1  -1  -2    4.39    0.67   1
   1  -1  -2    4.00    0.85   1
  -1   1   2    4.68    0.67   1
  -2  -1  -2   14.80    1.61   1
  -2  -1  -2   13.65    1.34   4
  -2  -1  -2   15.28    1.37   1
  -3  -1  -2    1.37    0.83   1
   3   1   2    3.24    0.75   4
   3   1   2    2.02    1.28   1
   3   1   2    2.52    0.73   1
  -3  -1  -2    2.97    0.60   4
   4   1   2   37.84    2.84   4
   4   1   2   42.70    4.90   1
   4   1   2   27.21    5.91   1
  -4  -1  -2   30.24   16.50   1
  -4  -1  -2   32.26    3.83   1
   5   1   2   38.80    3.92   1
   5   1   2   30.83    2.93   4
  -5  -1  -2   36.66   21.11   1
   5   1   2   38.30    6.57   1
  -5  -1  -2   34.08    2.65   1
   6   1   2   74.18    4.99   1
   6   1   2   74.00   18.62   4
   6   1   2   73.99    6.84   1
  -6  -1  -2   74.32    5.50   1
  -7  -1  -2  367.75   24.61   1
   7   1   2  348.90   23.38   1
   7   1   2  365.43   26.34   4
   8   1   2   13.87    1.74   4
   8   1   2   19.67    2.65   1
  -8  -1  -2   16.40    2.16   1
  -9  -1  -2   31.75    3.87   1
   9   1   2   28.33    4.48   1
   9   1   2   21.82    3.49   4
  10   1   2    7.26    1.29   4
 -12  -1  -2    8.71    2.94   1
 -13  -1  -2    2.30    2.46   1
  13   1   2    1.85    3.62   1
 -12   2   2   -5.02    2.74   1
  12  -2  -2    3.59    3.17   1
  11  -2  -2    1.25    1.90   1
 -11   2   2    3.70    2.34   1
  10  -2  -2   -2.73    1.63   1
 -10   2   2    0.15    3.09   1
  10  -2  -2    1.23    1.25   4
   9  -2  -2    3.74    1.70   4
   9  -2  -2   -0.56    1.73   1
  -9   2   2   -0.17    1.44   1
  -8   2   2   25.27    3.50   1
   8  -2  -2   21.70    2.37   4
   8  -2  -2   27.34    3.79   1
  -7   2   2    2.37    1.75   1
   6  -2  -2    3.82    1.79   1
  -6   2   2    2.24    1.69   1
  -5   2   2   24.10    3.18   1
   5  -2  -2   25.01    3.19   1
   5  -2  -2   29.47    3.11   1
  -5   2   2   30.12    2.70   1
  -4   2   2    4.39    1.95   1
  -4   2   2    6.36    3.17   1
   4  -2  -2    1.72    1.09   1
  -3   2   2 1662.52  103.71   1
   3  -2  -2 1717.10  109.75   1
  -3   2   2 1704.12  114.53   1
   3  -2  -2 1702.55  102.36   1
  -2   2   2  214.45   14.47   1
  -2   2   2  225.31   13.99   1
   2  -2  -2  207.58   18.39   1
   2  -2  -2  236.78   15.72   1
   1  -2  -2 4241.63  296.89   1
  -1   2   2 4887.68  384.48   1
   1  -2  -2 4582.69  299.24   1
  -1   2   2 5130.48  294.41   1
   0   2   2   17.44    1.51   1
   0   2   2   13.47    1.35   7
   0  -2  -2   17.82    1.53   7
   0  -2  -2   14.47    1.26   1
   0  -2  -2   15.59    1.52   1
   0   2   2   13.66    1.34   1
  -1  -2  -2 1151.41   76.61   1
  -1  -2  -2 1264.25   79.24   1
   1   2   2 1174.70   74.80   1
   1   2   2 1386.12  426.67   1
   2   2   2  495.45   33.38   3
  -2  -2  -2  508.04   31.25   1
   2   2   2  514.65   30.97   1
  -2  -2  -2  541.30   34.66   1
   2   2   2  512.58   30.92   1
  -3  -2  -2 1196.25   90.35   4
  -3  -2  -2 1264.74   74.22   1
   3   2   2 1328.38   78.88   1
  -3  -2  -2 1325.65   78.15   1
   3   2   2 1081.43   85.13   1
  -3  -2  -2 1278.61   86.47   3
  -4  -2  -2    0.68    0.71   1
   4   2   2    1.80    0.94   1
  -4  -2  -2    0.78    0.43   3
  -4  -2  -2    2.37    0.88   1
  -4  -2  -2    1.14    0.45   4
   4   2   2   -0.33    1.80   1
   5   2   2    2.24    0.84   1
  -5  -2  -2    3.77    1.06   1
   5   2   2    2.55    1.03   1
   6   2   2  246.90   18.46   1
  -6  -2  -2  255.66   18.53   1
   6   2   2  250.20   16.60   1
   7   2   2   39.41    4.48   1
   8   2   2   45.21    3.84   1
 -10  -2  -2    4.59    1.06   3
  10   2   2    7.75    2.10   1
  12   2   2   11.23    2.81   1
 -12  -2  -2   14.15    3.98   1
 -13  -2  -2   12.23    2.77   1
  12  -3  -2   17.15    4.39   1
  11  -3  -2   69.92    8.44   1
 -11   3   2   66.55    9.74   1
  10  -3  -2   -0.34    1.02   4
  10  -3  -2    2.94    1.87   1
 -10   3   2    0.11    2.61   1
   9  -3  -2    5.39    2.00   4
   9  -3  -2    4.15    1.77   1
   8  -3  -2    5.77    2.29   4
   8  -3  -2    2.58    1.58   1
  -7   3   2   69.91    5.80   1
   7  -3  -2   73.61    6.47   1
   6  -3  -2    0.73    1.57   1
  -5   3   2   50.16    4.99   1
   5  -3  -2   53.91    4.46   1
   5  -3  -2   56.27    4.83   1
  -4   3   2   81.96    5.63   1
   4  -3  -2   65.40    5.50   1
  -4   3   2   76.33    5.70   1
   4  -3  -2   78.79    5.64   1
   3  -3  -2  193.19   16.74   1
  -3   3   2  194.97   17.24   1
  -3   3   2  250.34   15.70   1
  -2   3   2 1236.42   83.22   1
  -2   3   2 1497.33   87.77   1
   2  -3  -2 1531.33  145.90   1
   2  -3  -2 1141.81   99.27   1
  -1   3   2  822.57   51.38   1
   1  -3  -2  781.09   49.59   1
   1  -3  -2  712.06   50.28   1
  -1   3   2  812.02   54.00   1
   0  -3  -2  357.14   22.60   1
   0  -3  -2  365.96   23.13   1
   0  -3  -2  341.85   26.01   7
   0   3   2  356.93   21.84   1
   0   3   2  342.61   24.96   7
   0   3   2  342.00   25.94   6
  -1  -3  -2   81.84    6.32   7
   1   3   2  106.31   28.05   1
  -1  -3  -2   86.59    5.97   2
  -1  -3  -2   94.44    6.27   1
   1   3   2   89.96    5.78   1
   2   3   2  552.62   37.50   1
   2   3   2  424.31  109.50   2
   2   3   2  572.89   35.08   1
  -2  -3  -2  566.82   35.01   1
  -2  -3  -2  519.89   30.29   1
   3   3   2  720.52   48.80   3
   3   3   2  622.39   47.71   1
  -3  -3  -2  789.34   46.32   1
  -3  -3  -2  764.09   45.25   1
   3   3   2  731.46   44.26   1
   4   3   2   14.40    1.52   1
  -4  -3  -2   18.20    1.98   1
  -4  -3  -2   17.51    1.41   3
   4   3   2   12.88    2.10   1
   5   3   2    2.93    1.44   1
  -5  -3  -2    1.59    0.94   1
   5   3   2    2.94    0.95   1
  -5  -3  -2    1.42    1.25   1
  -5  -3  -2    0.63    1.00   3
  -6  -3  -2    4.03    0.81   3
  -6  -3  -2    9.08    5.69   1
  -6  -3  -2    4.66    1.13   1
   6   3   2    3.01    1.47   1
  -7  -3  -2   35.11    2.99   1
  -7  -3  -2   29.58    2.07   3
   7   3   2   29.41    4.94   1
  -8  -3  -2   14.61    1.74   3
   8   3   2   16.72    2.87   1
  -9  -3  -2   -0.01    1.54   1
  -9  -3  -2    0.61    0.79   3
 -10  -3  -2    9.90    2.04   3
  11   3   2  134.76   12.74   1
 -12  -3  -2    0.26    1.85   1
  12   3   2    4.45    2.45   1
 -13  -3  -2    3.24    2.46   1
  13   3   2    0.83    2.17   1
 -11   4   2   -2.21    2.45   1
  11  -4  -2    3.84    2.92   1
 -10   4   2   30.03    4.13   1
  10  -4  -2   26.71    3.46   4
  -9   4   2   -0.85    1.61   1
   9  -4  -2   -1.68    1.85   4
   9  -4  -2    0.34    1.89   1
   8  -4  -2   25.12    3.09   1
  -8   4   2   33.37    4.31   1
   8  -4  -2   29.46    3.42   4
   7  -4  -2   45.70    4.19   1
  -7   4   2   43.07    4.70   1
  -6   4   2    3.45    1.32   1
   6  -4  -2   -0.08    1.05   1
   5  -4  -2    0.00    0.73   1
   5  -4  -2    1.27    1.37   1
   4  -4  -2    3.02    1.00   1
   4  -4  -2    3.02    1.34   1
  -3   4   2    1.36    1.04   1
   3  -4  -2    2.89    1.30   1
   2  -4  -2    2.79    1.18   1
  -2   4   2    3.80    0.96   1
   2  -4  -2    0.96    1.20   1
  -2   4   2    2.58    0.86   1
  -1   4   2  436.00   29.95   1
   1  -4  -2  418.66   25.74   1
   1  -4  -2  431.63   28.77   1
  -1   4   2  418.46   26.12   1
   0  -4  -2  288.36   20.50   1
   0   4   2  310.22   22.16   6
   0   4   2  320.64   20.47   1
   0  -4  -2  339.44   21.70   1
   0  -4  -2  311.67   21.22   7
   0   4   2  328.54   22.31   7
   0  -4  -2  323.10   19.95   5
   1   4   2  197.40   14.45   1
  -1  -4  -2  204.65   14.10   6
  -1  -4  -2  208.08   14.58   7
  -1  -4  -2  209.71   16.51   2
   1   4   2  190.68   14.39   7
   1   4   2  209.44   12.80   1
  -1  -4  -2  215.78   14.25   1
   2   4   2 1446.59   89.66   1
   2   4   2 1364.54   90.05   2
   2   4   2 1503.70   92.00   1
  -2  -4  -2 1532.66   88.58   1
  -2  -4  -2 1409.78  107.00   7
   3   4   2   -0.76    0.64   1
  -3  -4  -2   -0.79    0.61   1
   3   4   2   -0.26    0.81   1
  -3  -4  -2    0.89    0.88   1
   3   4   2    0.75    0.59   3
  -4  -4  -2  829.16   47.80   1
   4   4   2  777.65   55.66   3
  -4  -4  -2  781.55   47.79   1
   4   4   2  689.92   48.45   1
   4   4   2  784.91   54.04   1
   5   4   2  179.45   15.25   1
  -5  -4  -2  189.81   12.08   1
  -5  -4  -2  184.16   11.87   1
  -5  -4  -2  193.88   11.66   3
   6   4   2  106.07    7.55   1
  -6  -4  -2   95.69    6.84   3
  -6  -4  -2   94.66    8.54   1
  -6  -4  -2   95.05    7.30   1
  -7  -4  -2    7.44    1.22   3
  -7  -4  -2    5.76    1.76   1
   8   4   2  158.05   10.66   1
  -8  -4  -2  153.67   11.71   1
  -8  -4  -2  146.36   10.51   3
  -9  -4  -2    0.37    0.84   3
   9   4   2   -2.77    1.76   1
 -10  -4  -2    9.97    2.44   1
 -10  -4  -2    7.30    1.36   3
 -11  -4  -2   13.79    2.94   1
  11   4   2   16.29    2.93   1
  12   4   2   19.90    3.43   1
 -13  -4  -2   10.16    2.68   1
  13   4   2   11.53    3.97   1
  11  -5  -2    5.83    3.12   1
  11  -5  -2    9.94    2.57   4
  10  -5  -2   -1.32    1.31   4
 -10   5   2   -1.88    1.81   1
   9  -5  -2   -2.63    1.59   1
  -9   5   2    1.05    1.93   1
   9  -5  -2    0.75    1.53   4
  -8   5   2    2.53    2.37   1
   8  -5  -2    1.03    1.62   1
   7  -5  -2  315.00   21.51   4
  -7   5   2  285.65   21.84   1
  -6   5   2    4.14    1.43   1
   6  -5  -2    5.69    1.62   1
   5  -5  -2   94.29    6.55   1
  -5   5   2   93.03    6.08   1
   4  -5  -2  158.42   12.09   1
  -4   5   2  148.26   12.78   1
   4  -5  -2  185.52   10.91   1
  -3   5   2  157.27   10.86   1
  -3   5   2  157.42   10.96   1
   3  -5  -2  141.07    9.89   1
   3  -5  -2  148.82    9.29   1
  -2   5   2  196.45   14.70   1
   2  -5  -2  183.95   12.78   1
  -2   5   2  218.54   13.11   1
   2  -5  -2  213.93   13.03   1
  -1   5   2  300.37   26.16   1
  -1   5   2  310.64   21.62   1
   1  -5  -2  315.51   19.78   1
   1  -5  -2  313.38   19.34   1
  -1   5   2  311.99   20.90   7
   0  -5  -2   79.65    5.00   5
   0   5   2   90.45    7.07   7
   0  -5  -2   71.53    6.02   7
   0   5   2   78.64    5.96   6
   0  -5  -2   86.51    5.36   1
   0   5   2   86.05    6.11   1
   0  -5  -2   91.29    5.49   1
   1   5   2  255.61   16.88   5
   1   5   2  250.81   18.42   7
   1   5   2  223.94   17.94   1
  -1  -5  -2  276.49   17.02   7
  -1  -5  -2  248.14   19.83   6
  -1  -5  -2  231.45   15.66   2
   1   5   2  276.28   16.71   1
  -2  -5  -2  143.92   11.80   7
   2   5   2  139.56   47.16   1
  -2  -5  -2  149.15    8.74   1
  -2  -5  -2  127.05    8.84   1
   2   5   2  131.22    9.12   1
  -3  -5  -2  138.77    8.20   1
   3   5   2  121.05    8.39   3
   3   5   2  131.02    7.82   1
   3   5   2  106.87   26.75   2
  -3  -5  -2  132.12    8.89   1
   3   5   2  116.57    8.69   1
   4   5   2  182.24   12.57   1
  -4  -5  -2  193.45   13.04   1
   4   5   2  188.73   13.23   3
  -4  -5  -2  201.59   13.91   1
   4   5   2  186.12   13.17   1
   5   5   2    1.49    0.72   3
  -5  -5  -2    1.43    0.87   1
  -5  -5  -2    1.63    0.36   4
   5   5   2    1.49    1.13   1
  -5  -5  -2    0.55    1.27   1
   5   5   2    1.30    0.73   1
   6   5   2   26.68    3.49   1
  -6  -5  -2   36.29    4.93   1
  -6  -5  -2   30.88    3.18   1
  -6  -5  -2   27.17    2.42   3
  -7  -5  -2   15.99    2.56   1
   7   5   2   23.34    2.94   1
  -7  -5  -2   20.34    1.89   3
   8   5   2   28.15    3.11   1
  -8  -5  -2   18.08    2.49   1
  -8  -5  -2   23.04    2.19   3
  -9  -5  -2   29.13    2.53   3
   9   5   2   27.86    3.42   1
  -9  -5  -2   31.63    3.16   1
 -10  -5  -2    8.52    1.20   3
  10   5   2    9.67    2.61   1
  11   5   2   21.99    3.58   1
 -12  -5  -2    5.89    2.91   1
  12   5   2    4.57    2.97   1
 -13  -5  -2    5.47    3.49   1
  10  -6  -2    5.65    2.21   4
 -10   6   2   11.06    3.31   1
  10  -6  -2    6.55    2.49   1
   9  -6  -2    6.39    2.55   1
   9  -6  -2    5.63    2.70   4
   8  -6  -2    0.39    1.94   1
  -8   6   2   -0.09    1.30   1
   8  -6  -2   -1.34    2.24   4
   7  -6  -2   18.30    2.54   4
  -7   6   2   12.91    2.54   1
   6  -6  -2    0.61    1.42   1
  -6   6   2   -1.47    1.21   1
   5  -6  -2    3.74    1.57   1
  -5   6   2    7.40    2.33   1
   4  -6  -2    0.63    1.44   1
  -4   6   2   -0.38    1.16   1
   4  -6  -2   -2.28    1.69   1
  -3   6   2   35.35    3.53   1
   3  -6  -2   44.56    3.43   1
   3  -6  -2   48.56    4.10   1
  -2   6   2   55.47    4.91   1
  -2   6   2   54.17    4.69   1
   2  -6  -2   52.00    3.80   1
   2  -6  -2   58.73    4.56   1
  -1   6   2   58.54    4.20   7
   1  -6  -2   50.78    4.30   1
  -1   6   2   49.16    3.94   1
   1  -6  -2   44.30    4.25   1
  -1   6   2   61.60    4.45   1
   1  -6  -2   54.19    3.50   5
   0   6   2  118.58    7.99   6
   0  -6  -2  142.91    9.91   1
   0   6   2  129.49    9.58   1
   0  -6  -2  123.47    9.34   7
   0  -6  -2  128.46    8.09   5
   0   6   2  133.37    9.69   7
   0  -6  -2  114.98    7.97   1
   1   6   2  203.18   14.49   7
  -1  -6  -2  227.00   15.42   7
   1   6   2  203.68   14.50   1
  -1  -6  -2  203.14   15.29   1
   1   6   2  196.88   13.71   5
   1   6   2  225.28   14.52   1
  -1  -6  -2  209.51   14.74   2
  -2  -6  -2   11.90    1.32   1
  -2  -6  -2   12.67    1.55   6
   2   6   2    8.16    1.42   1
  -2  -6  -2    9.56    1.57   1
  -2  -6  -2    9.30    2.22   7
  -3  -6  -2  824.74   57.70   7
   3   6   2  757.32   48.98   3
   3   6   2  782.21   58.35   2
   3   6   2  814.92   51.61   1
  -3  -6  -2  878.40   52.28   1
  -3  -6  -2  743.72   51.64   1
   3   6   2  953.65  329.58   1
  -4  -6  -2   64.08    4.07   1
   4   6   2   62.05    4.69   1
   4   6   2   59.28    5.11   1
   4   6   2   57.67    5.01   3
   4   6   2   37.99   11.07   2
  -4  -6  -2   60.98    5.16   1
  -5  -6  -2  351.64   30.53   4
  -5  -6  -2  360.62   24.36   1
  -5  -6  -2  364.34   24.55   1
   5   6   2  360.53   23.76   1
   5   6   2  366.47   22.82   3
  -6  -6  -2   17.56    2.23   1
   6   6   2   18.93    2.15   3
   6   6   2   14.68    2.23   1
  -7  -6  -2   15.90    2.90   1
   7   6   2   19.43    2.65   1
  -8  -6  -2   25.32    2.41   3
   8   6   2   23.00    2.74   1
  -9  -6  -2   35.78    3.33   1
  -9  -6  -2   29.04    2.64   3
  10   6   2    2.36    2.46   1
 -11  -6  -2    3.22    1.80   1
  11   6   2   -1.98    2.37   1
  13   6   2   10.07    4.15   1
 -13  -6  -2    8.54    3.16   1
  10  -7  -2    6.88    2.76   1
 -10   7   2    7.48    2.42   1
  10  -7  -2    8.94    3.12   4
  -9   7   2    2.07    2.33   1
   9  -7  -2   -1.72    2.29   4
   9  -7  -2    2.43    2.63   1
   8  -7  -2    1.24    2.79   1
  -8   7   2    0.80    3.16   1
   8  -7  -2    3.15    2.29   4
   7  -7  -2    9.57    2.48   1
   7  -7  -2    6.74    2.64   4
  -7   7   2    5.53    1.71   1
   6  -7  -2   14.11    2.53   1
   6  -7  -2   12.39    2.28   4
   5  -7  -2    5.25    1.43   1
   4  -7  -2   52.79    5.80   1
  -4   7   2   49.83    4.50   1
   4  -7  -2   44.44    3.99   1
  -3   7   2  136.88    8.19   1
   3  -7  -2  115.52    8.65   1
   3  -7  -2  121.75    8.30   1
   2  -7  -2   40.95    3.24   1
   2  -7  -2   42.78    2.84   5
  -2   7   2   42.18    3.65   1
   2  -7  -2   46.67    4.48   1
  -2   7   2   42.31    4.59   7
   1  -7  -2 1108.94   71.23   1
   1  -7  -2 1111.03   71.13   5
  -1   7   2 1165.90   86.17   1
  -1   7   2 1199.98   96.10   1
   1  -7  -2 1170.09   76.24   1
  -1   7   2 1133.82  100.30   7
   0   7   2   18.43    2.41   7
   0  -7  -2   16.97    2.06   2
   0  -7  -2   19.10    1.96   1
   0  -7  -2   19.78    2.02   1
   0   7   2   20.79    2.48   1
   0   7   2   20.61    1.71   6
   0  -7  -2   15.97    1.53   5
   1   7   2   15.46    1.19   5
  -1  -7  -2   15.96    2.56   1
   1   7   2   16.76    3.14   7
  -1  -7  -2   16.89    3.00   7
   1   7   2   22.42    2.26   1
   1   7   2   19.46    2.04   1
   2   7   2  402.67   25.36   1
   2   7   2  361.87   26.22   5
   2   7   2  365.99   27.45   1
  -2  -7  -2  395.37   28.98   1
  -2  -7  -2  336.34   27.91   6
  -2  -7  -2  359.65   28.70   7
  -2  -7  -2  392.69   25.75   1
  -3  -7  -2   62.20    5.51   7
  -3  -7  -2   49.12    4.38   1
   3   7   2   46.26   18.55   1
  -3  -7  -2   47.45    4.07   6
   3   7   2   49.85    4.11   3
   3   7   2   59.34    4.37   1
  -3  -7  -2   55.61    4.37   1
   4   7   2    3.97    0.99   3
   4   7   2    2.92    1.31   1
  -4  -7  -2    4.25    1.11   1
  -5  -7  -2   42.55    3.60   4
   5   7   2   50.31    4.56   1
  -5  -7  -2   50.81    3.84   1
   5   7   2   30.62    9.58   2
  -5  -7  -2   50.53    3.66   1
   5   7   2   46.79    3.84   3
  -5  -7  -2   43.70    4.35   7
  -6  -7  -2   21.33    1.93   4
  -6  -7  -2   16.37    2.48   1
   6   7   2   16.31    2.19   3
   7   7   2    1.84    1.18   1
   8   7   2   14.35    3.64   1
   9   7   2    4.88    2.47   1
  -9  -7  -2    9.28    2.14   1
  10   7   2    3.77    2.16   1
  11   7   2    7.80    3.04   1
 -11  -7  -2    3.20    1.92   1
  12   7   2    3.74    2.53   1
 -12  -7  -2    1.07    1.84   1
  13   7   2   16.32    4.53   1
   9  -8  -2    4.11    3.15   4
  -9   8   2    1.43    1.70   1
   8  -8  -2   60.32    6.22   1
   8  -8  -2   58.90    6.59   4
  -8   8   2   52.46    5.74   1
   7  -8  -2    3.61    1.78   1
  -7   8   2    2.64    1.66   1
  -6   8   2    7.89    2.45   1
   6  -8  -2    5.35    2.16   4
   6  -8  -2    8.84    3.07   1
  -5   8   2   15.42    2.07   1
   5  -8  -2   15.88    2.81   1
   4  -8  -2   78.87    6.08   1
  -4   8   2   90.55    7.42   1
  -3   8   2   24.20    2.63   1
   3  -8  -2   23.65    4.00   1
   3  -8  -2   19.53    2.06   5
   3  -8  -2   22.44    2.29   1
   2  -8  -2    6.11    1.98   1
  -2   8   2   10.52    2.48   7
  -2   8   2    6.95    1.79   1
   2  -8  -2    8.89    1.24   5
   2  -8  -2   12.22    2.16   1
   1  -8  -2   75.04    5.23   1
  -1   8   2   52.72    6.24   7
   1  -8  -2   57.72    5.18   1
   1  -8  -2   62.98    4.62   5
  -1   8   2   71.06    5.87   1
   0   8   2   62.77    4.52   1
   0  -8  -2   44.58    4.83   2
   0   8   2   53.84    3.74   6
   0   8   2   62.07    6.95   7
   0  -8  -2   60.57    4.43   1
   0  -8  -2   47.60    4.84   1
   1   8   2   28.78    4.22   7
   1   8   2   30.10    1.97   5
  -1  -8  -2   35.89    9.74   1
  -1  -8  -2   34.21    3.96   7
  -1  -8  -2   34.25    2.85   1
   1   8   2   37.46    2.90   1
  -2  -8  -2   68.22    5.90   1
   2   8   2   75.80    4.87   5
   2   8   2   77.98    5.63   7
   2   8   2   67.61    6.16   1
  -2  -8  -2   64.64    6.24   7
  -3  -8  -2   54.83    4.84   1
   3   8   2   61.22    4.37   1
  -3  -8  -2   55.16    4.78   6
  -3  -8  -2   50.66    5.48   7
   4   8   2    1.83    1.08   3
   4   8   2    0.01    0.98   2
  -4  -8  -2    0.32    1.67   7
  -4  -8  -2    1.27    0.90   1
   5   8   2   35.20    3.98   1
  -5  -8  -2   32.11    2.92   4
   5   8   2   24.84    8.66   2
  -5  -8  -2   38.09    3.37   1
  -5  -8  -2   31.44    3.15   1
  -5  -8  -2   28.21    4.14   7
   5   8   2   34.74    2.85   3
  -6  -8  -2    3.02    0.71   4
   6   8   2    4.06    1.11   3
   6   8   2    1.84    1.14   1
  -6  -8  -2    1.94    2.04   7
   7   8   2   46.78    3.88   3
  -7  -8  -2   40.97    3.91   1
   7   8   2   49.21    4.54   1
   8   8   2  146.34   11.23   1
   9   8   2    3.52    1.67   1
  11   8   2    0.26    1.98   1
 -12  -8  -2   17.21    3.49   1
  12   8   2   12.72    3.42   1
   9  -9  -2    5.28    2.25   1
  -8   9   2    5.35    1.91   1
   8  -9  -2    6.83    2.74   4
   7  -9  -2    3.76    1.77   1
   7  -9  -2    4.24    2.87   4
   6  -9  -2    2.02    2.10   4
   6  -9  -2    4.46    1.72   1
   5  -9  -2    6.81    1.88   1
   5  -9  -2    7.38    3.74   4
   4  -9  -2  104.61    8.52   5
   4  -9  -2  109.48    8.66   1
  -4   9   2   85.48    7.71   1
  -3   9   2  113.97    8.40   1
   3  -9  -2   97.14    6.79   1
   3  -9  -2  118.52    8.69   1
   3  -9  -2   98.64    6.90   5
  -2   9   2  114.51    9.28   1
   2  -9  -2  106.01    9.85   1
   2  -9  -2  124.24   10.31   1
   2  -9  -2  123.48    8.13   5
   1  -9  -2   64.84    5.36   1
  -1   9   2   79.82    8.05   1
   1  -9  -2   76.32    6.18   1
   1  -9  -2   72.32    5.82   5
  -1   9   2   74.50    5.66   6
   0  -9  -2    6.77    1.18   1
   0   9   2    6.78    1.23   6
   0   9   2    4.40    1.25   1
   0  -9  -2    5.42    1.52   1
  -1  -9  -2    6.16    1.74   7
   1   9   2    5.97    2.15   7
   2   9   2   13.25    1.16   5
   2   9   2   11.40    2.49   1
  -2  -9  -2   15.99    2.63   7
  -2  -9  -2   11.04    1.63   1
   2   9   2   11.04    2.04   7
  -3  -9  -2   55.03    5.76   7
  -3  -9  -2   54.35    5.02   1
  -3  -9  -2   55.29    4.44   1
   3   9   2   49.38    4.25   1
   3   9   2   49.97    4.14   5
  -3  -9  -2   43.87    3.65   6
  -4  -9  -2   60.59    5.02   4
   4   9   2   50.11   11.01   1
  -4  -9  -2   45.28    5.45   7
   4   9   2   51.31    5.21   3
  -4  -9  -2   59.11    4.83   1
  -4  -9  -2   46.34    4.14   1
  -4  -9  -2   59.98    7.60   6
  -5  -9  -2   13.97    2.45   1
   5   9   2   11.05    1.76   3
   5   9   2   11.81    1.53   2
  -5  -9  -2   14.56    2.61   7
   6   9   2   11.98    5.70   2
  -6  -9  -2   18.81    2.11   4
   6   9   2   21.27    3.23   1
  -6  -9  -2   18.14    2.99   7
  -7  -9  -2    5.37    1.79   1
   7   9   2    6.17    2.02   1
   7   9   2    4.62    1.63   2
  -7  -9  -2    2.94    0.59   4
  -8  -9  -2   20.13    3.33   1
   8   9   2   25.51    3.47   1
   9   9   2    6.78    2.52   1
  10   9   2   -1.06    1.44   1
  11   9   2    5.91    2.77   1
  12   9   2   -3.46    1.88   1
   8 -10  -2   54.87    7.30   1
  -8  10   2   37.60    7.47   1
   8 -10  -2   49.31    7.42   4
   7 -10  -2   12.85    3.13   4
   7 -10  -2   10.49    2.82   1
   6 -10  -2   26.01    4.34   4
   6 -10  -2   21.54    3.54   5
  -6  10   2   32.20    4.11   1
   6 -10  -2   25.25    3.69   1
  -5  10   2    4.23    1.67   1
   4 -10  -2   12.95    2.25   1
   4 -10  -2   16.12    2.22   5
   4 -10  -2   15.74    3.79   4
   3 -10  -2    7.87    2.51   1
  -3  10   2    0.76    1.85   1
   3 -10  -2    4.52    2.17   4
   3 -10  -2    4.07    1.22   5
  -2  10   2   -0.26    0.95   1
   2 -10  -2    0.67    0.88   5
   2 -10  -2    1.18    1.16   1
   2 -10  -2    2.46    1.30   1
   2 -10  -2    2.47    2.66   4
   1 -10  -2   14.13    1.43   5
   1 -10  -2   21.45    4.32   1
  -1  10   2   11.20    1.61   6
  -1  10   2   16.90    2.51   1
   0  10   2    4.36    1.01   6
   0 -10  -2    4.74    1.86   1
  -1 -10  -2    3.00    1.82   1
  -1 -10  -2    0.32    1.72   7
   1  10   2    1.60    1.39   1
  -2 -10  -2   45.77    3.93   1
  -2 -10  -2   38.84    4.94   7
   2  10   2   48.21    3.91   5
  -2 -10  -2   51.31    3.94   1
   2  10   2   45.25    4.79   1
  -3 -10  -2    3.35    1.44   1
   3  10   2    2.40    1.65   1
  -3 -10  -2    5.81    2.94   7
  -3 -10  -2    0.56    1.74   4
  -4 -10  -2   44.64    6.55   7
   4  10   2   42.82    3.82   1
   4  10   2   35.36    3.11   5
  -4 -10  -2   30.87    3.45   1
  -4 -10  -2   35.17    4.22   6
  -5 -10  -2   -0.20    0.73   4
  -5 -10  -2    1.40    1.65   1
   5  10   2    1.44    2.49   1
  -5 -10  -2    1.59    1.25   1
  -6 -10  -2   75.72    7.14   7
  -6 -10  -2   60.03    7.25   1
  -6 -10  -2   76.61    6.12   4
  -6 -10  -2   59.94    5.22   1
   6  10   2   62.41    4.84   2
  -7 -10  -2    2.31    2.94   7
   7  10   2    3.44    1.15   2
  -7 -10  -2    3.17    1.00   4
   7  10   2    2.17    0.89   3
   7  10   2    2.58    1.87   1
   8  10   2   21.82    3.93   1
  -8 -10  -2   28.09    4.13   7
   8  10   2   14.55    5.67   2
  -8 -10  -2   28.33    3.84   1
  -9 -10  -2    7.03    2.56   7
   9  10   2    3.13    2.29   1
  10  10   2    3.98    2.48   1
 -10 -10  -2    0.05    2.55   7
  11  10   2    1.86    2.62   1
 -11 -10  -2   -1.21    2.28   7
  12  10   2   30.45    4.70   1
 -12 -10  -2   32.98    5.38   1
   7 -11  -2    6.62    2.18   1
  -7  11   2    4.59    1.91   1
   6 -11  -2   55.79    7.52   1
   6 -11  -2   44.83    5.77   5
  -6  11   2   54.04    7.09   1
   6 -11  -2   60.62    6.30   4
   5 -11  -2   -1.43    3.06   4
   5 -11  -2    0.09    1.27   1
  -5  11   2    0.43    1.42   1
   4 -11  -2    7.96    1.56   5
   4 -11  -2   11.61    2.80   1
   4 -11  -2    3.70    3.03   4
   3 -11  -2   42.21    5.20   1
   3 -11  -2   34.76    4.71   4
   3 -11  -2   46.93    4.12   5
  -3  11   2   37.81    4.75   1
   2 -11  -2  106.53    7.58   1
  -2  11   2  108.97   10.25   6
   2 -11  -2  100.46    7.06   5
   2 -11  -2   97.17   11.91   1
   2 -11  -2  113.68    9.24   4
  -2  11   2  112.49    7.46   1
   1 -11  -2   94.94    9.72   4
  -1  11   2   91.11    7.82   6
   1 -11  -2   89.24    7.90   5
   1 -11  -2   90.61    8.22   1
  -1  11   2   77.46    6.43   1
   1 -11  -2   80.72    9.93   1
   0 -11  -2   13.95    1.93   1
   0 -11  -2   10.07    2.46   4
   0  11   2   10.17    2.18   1
   1  11   2   21.76    2.71   1
  -1 -11  -2   26.77    3.92   4
  -1 -11  -2   18.72    2.08   1
  -2 -11  -2  132.34   11.62   7
  -2 -11  -2  108.25   12.58   4
  -2 -11  -2  134.73    9.50   1
   2  11   2  117.38    9.63   5
   2  11   2  127.78   10.05   1
   3  11   2  329.96   26.55   1
  -3 -11  -2  322.38   25.12   7
  -3 -11  -2  331.96   34.59   1
  -3 -11  -2  339.79   22.54   1
  -3 -11  -2  303.28   28.33   4
   3  11   2  313.56   27.41   5
   4  11   2    1.88    0.89   5
  -4 -11  -2   -0.06    1.74   4
  -4 -11  -2    5.37    2.24   1
   4  11   2    0.59    1.33   1
  -4 -11  -2    1.38    1.16   1
  -4 -11  -2    2.51    2.04   7
  -5 -11  -2    6.83    1.99   4
  -5 -11  -2   10.97    2.36   1
  -5 -11  -2    6.94    2.30   1
  -5 -11  -2    7.08    2.32   7
  -6 -11  -2  114.91    8.99   4
  -6 -11  -2  117.96    9.45   1
  -6 -11  -2  105.42   11.63   7
  -7 -11  -2    8.96    2.56   7
  -7 -11  -2   10.23    2.38   1
   8  11   2   24.48    2.58   2
  -8 -11  -2   17.65    2.96   1
   8  11   2   18.87    3.19   1
   9  11   2    0.35    1.35   1
  -9 -11  -2   -0.36    2.03   7
   9  11   2    0.39    0.88   2
  -9 -11  -2    1.67    2.23   1
 -10 -11  -2    7.09    3.23   7
 -10 -11  -2    8.01    2.35   1
  10  11   2    4.00    2.70   1
 -11 -11  -2    1.17    2.40   7
 -11 -11  -2    2.36    2.23   1
  11  11   2    1.25    1.75   1
   6 -12  -2   -1.06    2.32   4
   6 -12  -2    3.83    1.96   1
  -5  12   2    8.42    3.49   1
   5 -12  -2    9.18    2.02   1
  -4  12   2   11.80    3.29   1
   4 -12  -2    3.44    2.05   1
   4 -12  -2    7.02    3.42   4
  -3  12   2    5.07    1.98   1
   3 -12  -2    6.52    2.29   4
   2 -12  -2   22.57    3.06   1
  -2  12   2   19.50    2.51   1
   2 -12  -2   17.48    1.69   5
   2 -12  -2   15.16    4.17   4
  -2  12   2   18.56    2.56   6
   1 -12  -2    4.97    1.38   1
  -1  12   2    4.98    1.12   6
   0 -12  -2    0.07    1.56   4
   0 -12  -2    0.10    1.17   1
  -1 -12  -2   64.93    5.92   1
  -1 -12  -2   76.20    7.17   4
   1  12   2   63.35    5.85   1
   2  12   2    9.04    2.09   1
  -2 -12  -2    7.91    2.37   1
  -2 -12  -2    8.90    1.53   1
  -2 -12  -2    9.17    2.22   4
  -2 -12  -2   14.77    3.45   7
  -3 -12  -2    3.37    2.72   7
   3  12   2    2.34    0.67   5
  -3 -12  -2    3.03    1.15   1
  -3 -12  -2    0.29    1.67   1
   3  12   2    1.94    2.23   1
   4  12   2   -0.14    0.76   5
  -4 -12  -2   -0.81    1.89   4
   4  12   2   -1.93    1.72   1
  -4 -12  -2   -0.82    1.41   1
  -5 -12  -2   43.27    3.49   4
  -5 -12  -2   35.78    5.09   7
   5  12   2   48.39    5.07   1
  -5 -12  -2   41.11    4.26   1
  -6 -12  -2   10.74    2.06   1
  -6 -12  -2    7.65    3.77   7
  -7 -12  -2   12.01    2.48   4
  -7 -12  -2   15.89    3.12   1
  -8 -12  -2   37.98    4.94   1
  -8 -12  -2   34.20    5.96   7
   8  12   2   45.00    5.28   2
  -9 -12  -2    5.57    1.93   1
  -9 -12  -2    2.09    2.84   7
   9  12   2    2.44    1.54   1
  10  12   2    6.20    2.00   1
 -10 -12  -2   11.47    3.39   1
 -11 -12  -2   55.05    8.38   7
 -11 -12  -2   52.52    6.16   1
   6 -13  -2    7.66    2.17   1
   5 -13  -2    6.09    2.70   4
   4 -13  -2    7.25    1.78   1
   4 -13  -2    2.99    2.25   4
   3 -13  -2    0.94    1.32   1
   3 -13  -2   -0.02    2.73   4
   2 -13  -2    2.17    1.28   1
  -2  13   2    2.75    1.57   1
   1 -13  -2    4.81    3.36   4
  -1  13   2    5.81    1.46   1
   1 -13  -2    4.12    1.36   1
   0 -13  -2    2.15    1.39   1
   0  13   2    1.12    1.09   1
   0 -13  -2    0.66    2.71   4
  -1 -13  -2   21.48    4.13   4
  -1 -13  -2   21.12    2.64   1
   1  13   2   17.41    2.92   1
  -2 -13  -2   -2.50    2.04   7
  -2 -13  -2   -0.69    1.71   1
   2  13   2   -0.04    1.63   1
  -2 -13  -2    3.28    2.08   4
  -3 -13  -2    7.13    1.92   1
  -3 -13  -2   11.74    3.41   7
   3  13   2    9.04    2.16   1
  -4 -13  -2   48.62    5.02   7
   4  13   2   42.27    6.57   1
  -4 -13  -2   43.17    4.82   1
  -5 -13  -2  182.19   14.93   4
  -5 -13  -2  197.30   18.31   7
   5  13   2  203.06   16.31   1
  -6 -13  -2    9.94    1.96   1
   6  13   2    6.02    2.23   1
  -6 -13  -2    9.83    2.58   4
  -6 -13  -2   11.14    3.65   7
  -7 -13  -2  117.94    8.88   1
  -7 -13  -2  116.37   10.08   7
  -8 -13  -2   12.21    2.90   1
  -8 -13  -2    6.79    3.25   7
  -9 -13  -2    3.35    2.52   7
  -9 -13  -2   -2.44    1.56   1
 -10 -13  -2    6.45    3.62   7
 -10 -13  -2    8.56    3.29   1
   4 -14  -2    0.87    1.42   1
   4 -14  -2    0.09    2.09   4
   3 -14  -2   14.80    2.66   1
   2 -14  -2    7.02    3.09   4
   1 -14  -2   13.79    3.84   4
   0 -14  -2   11.04    4.21   4
  -1 -14  -2    0.63    1.67   4
  -1 -14  -2   -0.38    1.11   1
  -2 -14  -2   12.81    2.11   1
  -2 -14  -2    9.81    2.21   4
  -3 -14  -2   25.17    3.69   7
  -3 -14  -2   24.33    3.25   1
  -4 -14  -2   16.03    2.16   1
  -4 -14  -2   18.64    3.77   7
  -4 -14  -2   19.97    2.98   4
  -5 -14  -2   38.84    3.90   4
  -5 -14  -2   39.89    5.20   7
  -6 -14  -2   12.65    4.03   7
  -6 -14  -2   13.64    2.41   4
  -7 -14  -2   -2.21    1.95   1
  -7 -14  -2   -0.32    2.36   7
  -8 -14  -2    1.14    2.62   1
  -8 -14  -2    0.40    2.24   7
  -9 -14  -2   -3.73    3.46   7
  -9 -14  -2    0.98    2.56   1
   3 -15  -2    5.95    2.90   4
   3 -15  -2    3.67    1.52   1
   2 -15  -2    4.39    1.62   1
   2 -15  -2    3.45    2.36   4
   1 -15  -2    2.34    2.26   4
   1 -15  -2    4.63    2.15   1
   0 -15  -2    1.11    1.24   1
   0 -15  -2    0.27    1.83   4
  -1 -15  -2    8.77    2.69   1
  -1 -15  -2    5.32    2.32   4
  -2 -15  -2    8.53    2.19   1
  -2 -15  -2    8.05    2.13   4
  -3 -15  -2    0.41    1.83   1
  -3 -15  -2    4.29    2.30   7
  -3 -15  -2    2.71    1.66   4
  -4 -15  -2    1.03    1.29   1
  -4 -15  -2   -1.43    1.40   4
  -4 -15  -2   -1.27    2.02   7
  -5 -15  -2    2.21    2.40   7
  -5 -15  -2    5.26    1.91   1
  -6 -15  -2    6.13    3.82   7
  -6 -15  -2    5.67    1.89   1
  -7 -15  -2   20.14    5.00   1
  -8 -15  -2    5.09    1.79   1
  -8 -15  -2    3.18    2.74   7
   1 -16  -2    0.12    2.11   4
   1 -16  -2    4.09    2.08   1
   0 -16  -2    1.55    2.38   4
   0 -16  -2    4.18    1.95   1
  -2 -16  -2    0.83    3.55   4
  -3 -16  -2   12.71    2.43   1
  -4 -16  -2    8.21    2.85   4
  -4 -16  -2   12.94    2.38   1
  -4 -16  -2   18.10    4.29   7
  -5 -16  -2    2.34    2.44   1
  -5 -16  -2    1.75    2.53   7
  -6 -16  -2   -1.67    1.75   1
  -6 -16  -2    1.84    2.55   7
  -7 -16  -2   14.37    2.39   1
  -3 -17  -2    3.07    1.53   1
  -6 -16   3   44.12    6.73   7
  -5 -16   3   34.38    3.60   1
  -5 -16   3   30.78    5.85   7
  -4 -16   3    3.73    2.10   1
  -4 -16   3    7.63    3.70   7
  -4 -16   3    1.79    1.80   4
  -3 -16   3    1.64    1.18   1
  -3 -16   3   -2.10    1.64   4
  -2 -16   3    7.71    2.96   4
  -2 -16   3   10.05    1.75   1
  -1 -16   3    2.95    1.75   1
  -1 -16   3    3.28    3.11   4
   0 -16   3   48.65    6.92   4
   0 -16   3   62.14    6.74   1
  -8 -15   3    1.62    1.36   1
  -7 -15   3   11.52    5.63   7
  -6 -15   3    0.64    1.43   1
  -6 -15   3   -1.43    2.42   7
  -5 -15   3   10.26    2.56   4
  -5 -15   3   11.17    1.87   1
  -4 -15   3    7.00    1.49   1
  -4 -15   3   13.53    3.84   7
  -3 -15   3   19.71    3.05   1
  -3 -15   3   18.61    3.06   4
  -3 -15   3   27.06    4.22   7
  -2 -15   3   -0.17    1.18   1
  -1 -15   3   10.07    2.07   1
   0 -15   3    2.51    2.89   4
   0 -15   3    3.30    1.77   1
   1 -15   3   19.27    2.49   1
   2 -15   3    6.02    2.77   4
   2 -15   3    1.07    1.46   1
   3 -15   3   12.79    2.50   1
   3 -15   3   14.08    3.40   4
  -9 -14   3   26.10    4.77   7
  -9 -14   3   29.82    5.24   1
  -8 -14   3   16.45    3.32   1
  -8 -14   3   18.30    5.56   7
  -7 -14   3    4.28    1.65   1
   7  14  -3    5.25    2.31   2
   6  14  -3   34.14    5.01   2
  -5 -14   3    4.05    2.83   7
  -5 -14   3    2.56    2.29   4
  -5 -14   3    3.63    1.43   1
  -4 -14   3   10.36    1.98   1
  -4 -14   3    7.72    2.12   4
  -3 -14   3    2.83    1.42   1
  -3 -14   3    4.03    2.38   4
  -2 -14   3   -1.92    1.87   4
  -1 -14   3   77.58    6.82   4
  -1 -14   3   76.27    7.92   1
   0 -14   3    3.57    1.26   1
   0  14  -3    1.60    1.82   6
   0 -14   3    1.92    2.67   4
   1 -14   3    1.34    1.36   1
  -1  14  -3   -0.15    1.59   6
   1 -14   3   -0.29    1.95   4
  -2  14  -3   20.71    3.59   6
   2 -14   3   24.51    4.63   4
   3 -14   3    9.85    2.15   1
   3 -14   3    7.21    2.88   4
   4 -14   3    1.56    2.48   4
  -9 -13   3    1.57    3.79   7
  -9 -13   3    1.39    1.59   1
   8  13  -3    5.07    1.99   2
  -8 -13   3    3.07    1.45   1
  -8 -13   3    5.84    2.90   7
   7  13  -3    4.37    1.62   2
  -7 -13   3   -2.44    3.27   7
  -7 -13   3    3.23    1.84   1
   6  13  -3    1.36    1.72   2
  -6 -13   3    4.22    1.90   4
  -6 -13   3    9.42    4.53   7
  -5 -13   3   11.21    4.23   7
  -5 -13   3   15.17    3.15   4
   5  13  -3   14.69    2.67   2
  -4 -13   3   -0.86    1.14   1
  -4 -13   3    0.78    1.44   4
  -4 -13   3   -0.98    1.98   7
  -3 -13   3   10.84    2.28   4
  -3 -13   3   14.08    1.79   1
  -3 -13   3   14.51    3.40   7
  -2 -13   3   -0.05    3.45   7
  -2 -13   3    7.19    3.07   4
  -2 -13   3    2.11    0.88   1
  -1 -13   3   84.55    7.24   1
  -1 -13   3   94.61    8.59   4
   0  13  -3    5.32    2.07   6
   0 -13   3    5.54    2.04   4
   0 -13   3    2.95    1.58   1
  -1  13  -3   25.06    3.05   6
   1 -13   3   17.22    2.56   1
   2 -13   3   10.06    1.83   5
   2 -13   3   11.92    1.66   1
   2 -13   3    6.42    2.48   4
   3 -13   3    2.38    1.26   5
   3 -13   3   -0.67    2.02   4
   3 -13   3    1.59    1.59   1
   4 -13   3   40.28    5.18   4
   4 -13   3   36.52    4.58   1
   5 -13   3   -1.17    2.15   1
   5 -13   3    3.57    3.85   4
 -10 -12   3    0.25    2.39   1
 -10 -12   3    2.79    4.11   7
  -9 -12   3   19.28    4.80   7
  -9 -12   3   10.66    2.13   1
  -8 -12   3    0.42    1.17   1
  -8 -12   3    1.76    3.01   7
   8  12  -3    3.02    1.55   2
  -7 -12   3    0.04    1.64   1
  -7 -12   3   -0.96    3.73   7
   7  12  -3    2.55    2.35   2
  -6 -12   3    0.06    1.41   4
   6  12  -3    2.40    2.30   2
   5  12  -3   24.14    3.30   1
  -5 -12   3   22.92    3.33   4
  -5 -12   3   19.55    2.63   1
  -4 -12   3   14.17    3.12   4
   4  12  -3   18.50    2.51   1
  -4 -12   3   12.57    3.00   7
  -4 -12   3   12.63    2.05   1
   4  12  -3   14.65    2.12   2
   3  12  -3   29.02    4.01   1
  -3 -12   3   27.39    5.26   7
  -3 -12   3   33.50    4.15   4
  -3 -12   3   32.68    3.13   1
  -2 -12   3    2.87    1.07   1
   2  12  -3    4.20    1.70   1
  -2 -12   3    2.66    2.37   7
  -1 -12   3   76.39    6.48   1
   1  12  -3   62.24    8.52   5
  -1 -12   3   63.90    7.74   4
   1  12  -3   76.49    6.45   6
   1  12  -3   78.21   15.67   1
   0  12  -3   86.60    8.56   1
   0 -12   3   87.39   10.07   4
   0  12  -3   77.43    7.32   6
   0 -12   3   85.29    6.60   1
   1 -12   3   11.93    1.70   1
   1 -12   3    9.14    1.66   5
   1 -12   3   13.94    3.18   4
   2 -12   3    5.49    1.19   1
  -2  12  -3    4.71    2.47   6
   2 -12   3    8.24    2.71   4
   3 -12   3   27.76    2.78   1
   3 -12   3   36.24    3.50   5
   3 -12   3   35.74    6.54   4
   4 -12   3    1.35    1.63   5
   4 -12   3   -0.24    2.98   4
   5 -12   3   -1.86    3.18   4
   5 -12   3    3.31    1.19   5
   5 -12   3    4.74    1.49   1
   6 -12   3   29.64    4.21   1
   6 -12   3   34.86    6.90   4
   6 -12   3   33.79    4.73   5
 -11 -11   3    1.96    2.65   7
 -11 -11   3   -3.24    1.84   1
 -10 -11   3    9.71    2.47   1
  -9 -11   3    1.74    2.50   7
  -9 -11   3    2.58    1.70   1
   8  11  -3    3.00    1.45   1
  -8 -11   3    3.67    1.40   1
  -8 -11   3   -1.32    2.26   7
   7  11  -3    1.00    1.35   2
  -7 -11   3    3.21    3.49   7
  -7 -11   3    0.16    1.04   1
   7  11  -3    0.82    1.40   1
  -6 -11   3   24.75    3.45   4
  -6 -11   3   21.08    5.49   7
   6  11  -3   25.19    8.77   2
  -6 -11   3   22.38    3.55   1
   5  11  -3    0.12    1.63   1
  -5 -11   3   -0.03    1.25   4
   5  11  -3    0.05    2.10   2
  -5 -11   3    0.74    0.91   1
  -5 -11   3    0.27    2.80   7
  -4 -11   3   10.27    2.60   4
  -4 -11   3    7.43    1.21   1
   4  11  -3    5.69    1.81   2
  -4 -11   3    3.27    3.28   7
  -4 -11   3    8.06    1.38   1
   4  11  -3    9.71    1.76   1
  -3 -11   3   98.30    9.44   7
   3  11  -3   84.27   10.43   1
  -3 -11   3   81.40    6.90   1
  -3 -11   3   92.75    7.85   4
   3  11  -3   91.74    6.94   2
  -2 -11   3   58.26    6.44   7
   2  11  -3   80.55    5.87   1
  -2 -11   3   62.58    6.55   1
   2  11  -3   69.55    6.37   5
  -2 -11   3   68.06    7.40   4
  -2 -11   3   71.87    5.79   1
   1  11  -3   -0.78    0.81   1
   1  11  -3    0.94    3.18   6
  -1 -11   3    1.99    2.13   4
   1  11  -3   -0.07    0.99   5
  -1 -11   3   -0.73    1.00   1
  -1 -11   3    0.63    0.66   1
   0  11  -3  129.85   10.82   1
   0  11  -3  117.88    9.91   6
   0 -11   3  134.19   11.51   4
   0 -11   3  116.70    8.60   1
   1 -11   3   12.56    1.67   5
   1 -11   3   13.40    1.81   1
  -1  11  -3   15.79    2.13   1
  -1  11  -3   11.39    2.12   6
  -2  11  -3   -0.76    0.97   1
   2 -11   3   -0.60    2.03   4
   2 -11   3   -0.58    1.22   5
   2 -11   3   -1.33    1.17   1
   3 -11   3   40.29    3.58   1
  -3  11  -3   42.22    4.52   1
   3 -11   3   36.04    4.22   4
   3 -11   3   28.89    3.56   5
   4 -11   3   19.96    2.82   1
   4 -11   3   27.38    4.78   4
   4 -11   3   20.99    2.35   5
   5 -11   3   18.87    2.43   1
   5 -11   3   20.20    3.85   4
   6 -11   3   31.16    5.80   4
   6 -11   3   36.37    4.43   5
   6 -11   3   34.16    4.78   1
   7 -11   3   15.35    2.89   1
   7 -11   3   15.68    2.64   5
 -11 -10   3    4.48    1.92   1
 -11 -10   3    1.88    2.69   7
 -10 -10   3    5.71    2.65   7
 -10 -10   3    2.03    2.56   1
   9  10  -3    7.12    1.88   1
  -9 -10   3    8.39    3.55   7
  -9 -10   3    9.99    2.38   1
  -8 -10   3   10.62    3.95   7
   8  10  -3   12.29    3.17   1
   7  10  -3   48.73    4.08   1
  -7 -10   3   54.57    5.42   1
  -7 -10   3   52.41    6.98   7
  -6 -10   3   13.80    2.14   1
  -6 -10   3   10.07    1.81   4
   6  10  -3   13.57    3.57   2
  -6 -10   3   12.53    1.86   1
  -6 -10   3    8.33    3.95   7
  -5 -10   3    2.39    3.33   7
   5  10  -3    2.19    1.28   2
  -5 -10   3    3.00    1.45   1
   4  10  -3   44.04    5.12   1
  -4 -10   3   41.65    3.42   1
  -4 -10   3   35.38    4.02   4
   4  10  -3   38.15   12.06   2
  -4 -10   3   31.18    5.55   7
  -4 -10   3   45.20    3.73   1
   3  10  -3    1.02    1.28   1
   3  10  -3    0.17    0.68   5
   3  10  -3    1.00    1.60   2
   2  10  -3   -0.26    1.05   2
  -2 -10   3    0.48    2.94   7
   2  10  -3    0.58    0.88   1
  -2 -10   3    3.40    2.18   4
  -2 -10   3    0.04    0.82   1
   2  10  -3   -0.81    0.99   5
  -1 -10   3   25.22    2.65   4
  -1 -10   3   20.32    2.03   1
  -1 -10   3   23.48    2.58   1
   1  10  -3   18.19    3.51   6
   1  10  -3   21.97    2.24   5
   1  10  -3   25.83    2.20   1
   0  10  -3   30.56    2.99   6
   0 -10   3   31.53    2.62   1
   0  10  -3   30.28    2.56   1
   0 -10   3   39.08    5.02   4
   1 -10   3    0.12    0.62   1
   1 -10   3    1.35    1.11   5
   1 -10   3    0.09    0.90   1
   1 -10   3    1.81    1.87   4
   2 -10   3   33.89    3.10   1
   2 -10   3   32.79    2.97   1
   2 -10   3   40.62    5.01   4
  -2  10  -3   33.05    2.79   1
   2 -10   3   39.40    3.35   5
   3 -10   3   11.30    1.92   5
  -3  10  -3    9.83    1.64   1
   3 -10   3   12.95    2.58   4
  -4  10  -3   69.76    6.56   1
   4 -10   3   68.60    5.39   5
   4 -10   3   60.80    6.17   4
   4 -10   3   56.44    4.95   1
   5 -10   3    7.99    3.48   4
   5 -10   3    5.38    1.55   5
   5 -10   3    2.51    1.64   1
  -5  10  -3    8.80    2.02   1
   6 -10   3    2.36    1.93   4
  -6  10  -3   -0.63    1.38   1
   6 -10   3    3.07    1.59   1
   6 -10   3   -2.34    1.55   5
   7 -10   3    2.14    1.51   5
   7 -10   3    2.96    2.77   4
   8 -10   3    1.87    1.38   5
   8 -10   3    2.77    1.76   1
   8 -10   3    1.00    2.06   4
 -12  -9   3   -4.28    2.46   7
 -12  -9   3   -1.13    2.67   1
 -11  -9   3   27.32    4.47   1
  11   9  -3   24.27    3.77   1
 -10  -9   3    4.73    1.59   3
 -10  -9   3    5.31    2.24   1
  -9  -9   3   16.39    3.56   1
  -9  -9   3   10.27    2.18   3
   9   9  -3   14.77    2.75   1
   8   9  -3   41.94    4.71   1
  -8  -9   3   40.10    5.71   7
   7   9  -3    5.30    1.65   1
  -7  -9   3    2.96    3.46   7
  -7  -9   3    4.06    1.79   1
  -7  -9   3    2.89    1.46   1
  -6  -9   3    5.52    1.73   1
  -6  -9   3    5.44    2.97   7
  -6  -9   3    7.74    1.49   1
   6   9  -3    6.76    1.94   1
  -5  -9   3   41.35    6.97   7
   5   9  -3   50.84    4.70   1
  -5  -9   3   47.55    4.19   4
  -5  -9   3   50.63    4.47   1
  -4  -9   3    9.81    4.01   7
   4   9  -3    7.77    2.56   2
  -4  -9   3    4.39    1.00   1
   4   9  -3    0.86    2.82   1
  -4  -9   3    5.09    1.68   4
  -3  -9   3    2.80    1.30   4
  -3  -9   3    5.49    2.33   7
   3   9  -3    3.84    0.90   5
   3   9  -3    4.17    1.69   1
  -3  -9   3    3.39    1.06   1
   2   9  -3   16.20    1.98   5
   2   9  -3   12.61    1.75   1
  -2  -9   3   17.80    1.89   1
  -2  -9   3   14.94    1.71   1
  -2  -9   3   16.13    3.19   7
   2   9  -3   18.26    1.68   1
  -2  -9   3   11.37    2.73   4
   2   9  -3   14.52    1.76   2
  -1  -9   3   92.96    6.92   1
  -1  -9   3   80.37    5.78   1
   1   9  -3   75.33    6.28   1
   1   9  -3   89.76    7.03   6
   1   9  -3   85.34    6.29   5
   1   9  -3   87.34    6.71   1
  -1  -9   3  100.17    8.43   7
   0   9  -3   -0.27    0.76   1
   0   9  -3    0.87    0.83   5
   0   9  -3    0.79    1.11   6
   0  -9   3    1.01    1.01   5
   0  -9   3   -0.09    0.78   1
   1  -9   3   -0.50    0.74   5
   1  -9   3   -2.05    2.18   4
   1  -9   3    0.36    1.01   1
  -1   9  -3    0.21    0.84   1
   1  -9   3   -0.58    0.88   1
  -2   9  -3   12.29    1.64   1
   2  -9   3   14.32    1.91   1
   2  -9   3   13.20    1.74   1
   2  -9   3   12.97    1.80   5
  -3   9  -3   15.53    2.06   1
   3  -9   3   18.24    2.51   1
   3  -9   3   16.44    2.88   4
   3  -9   3   17.20    2.20   1
   4  -9   3   39.01    4.68   1
   4  -9   3   39.99    4.73   4
   4  -9   3   50.07    3.79   5
   4  -9   3   45.93    4.50   1
  -4   9  -3   52.31    4.72   1
   5  -9   3    4.38    2.50   4
   5  -9   3    2.43    1.18   1
   6  -9   3    1.66    1.24   1
   6  -9   3    4.47    2.87   4
  -6   9  -3   -0.35    0.95   1
  -7   9  -3   -0.06    1.18   1
   7  -9   3    1.58    1.47   1
   7  -9   3   -0.14    1.08   5
   7  -9   3    2.57    3.19   4
   8  -9   3    2.63    2.72   4
   8  -9   3    1.99    1.99   1
   9  -9   3    8.81    3.13   1
   9  -9   3    5.92    3.02   4
 -12  -8   3    0.87    2.84   1
  11   8  -3    8.59    2.21   1
 -10  -8   3    2.76    2.44   1
 -10  -8   3    0.47    0.96   3
  10   8  -3    1.50    1.72   1
  -9  -8   3    8.79    2.01   3
  -9  -8   3    5.67    2.37   7
   8   8  -3   62.68    5.77   1
  -8  -8   3   55.65    5.94   7
  -8  -8   3   66.62    5.70   3
  -7  -8   3    0.18    1.08   3
   7   8  -3   -0.28    2.84   1
  -7  -8   3    2.90    2.40   1
  -6  -8   3    6.61    1.82   3
  -6  -8   3    3.49    1.27   1
   6   8  -3    3.17    1.57   1
  -6  -8   3    1.49    2.34   7
   5   8  -3   50.27    4.27   1
  -5  -8   3   50.92    7.05   7
  -5  -8   3   43.02    5.17   4
  -5  -8   3   45.37    4.83   1
  -4  -8   3    1.38    0.74   1
   4   8  -3    1.16    1.04   1
  -4  -8   3    1.03    3.02   7
   3   8  -3  336.21   66.61   2
   3   8  -3  329.29   25.08   1
   3   8  -3  327.18   25.32   5
  -3  -8   3  317.85   30.66   4
  -3  -8   3  345.53   29.31   7
  -3  -8   3  332.17   24.52   1
  -3  -8   3  323.14   21.42   1
   3   8  -3  408.62  131.34   1
   2   8  -3   52.97    4.15   6
   2   8  -3   50.35    4.29   1
  -2  -8   3   48.19    4.26   4
   2   8  -3   43.62    3.77   1
  -2  -8   3   52.09    3.78   1
   2   8  -3   46.31    4.29   2
   2   8  -3   41.97    4.05   5
  -2  -8   3   49.32    4.33   1
  -2  -8   3   57.43    5.38   7
   1   8  -3   47.67    3.51   1
   1   8  -3   45.04    4.12   1
  -1  -8   3   48.36    3.62   1
   1   8  -3   48.20    4.34   5
   1   8  -3   58.07    4.58   6
  -1  -8   3   49.71    4.32   4
  -1  -8   3   51.08    3.68   1
  -1  -8   3   54.66    5.50   7
   0  -8   3    1.51    1.09   5
   0  -8   3    0.13    1.10   1
   0   8  -3    2.09    0.94   5
   0   8  -3    0.83    0.75   1
   0  -8   3   -0.05    0.77   1
   1  -8   3    6.59    1.21   1
   1  -8   3    4.96    1.71   4
   1  -8   3    4.46    1.34   5
  -1   8  -3    6.63    1.41   1
   1  -8   3    5.07    1.11   1
   2  -8   3   -0.51    1.49   4
   2  -8   3    1.28    1.11   1
   2  -8   3    3.32    1.79   5
   2  -8   3    0.76    0.78   1
  -2   8  -3    0.63    0.56   1
  -3   8  -3   15.93    1.64   1
   3  -8   3   17.80    3.34   4
   3  -8   3   15.10    1.94   5
  -4   8  -3   20.26    2.10   1
   4  -8   3   28.18    2.85   1
   4  -8   3   24.10    3.15   4
   4  -8   3   19.67    2.37   5
   5  -8   3  142.39    9.39   5
   5  -8   3  132.66   11.77   4
  -5   8  -3  126.28   11.62   1
   5  -8   3  123.02   22.17   1
   5  -8   3  108.11    9.90   1
   6  -8   3   14.45    2.17   5
   6  -8   3   16.85    3.13   1
  -6   8  -3   14.92    2.98   1
  -7   8  -3    6.67    2.25   1
   7  -8   3    9.48    3.17   4
   7  -8   3    5.46    2.42   1
   8  -8   3   11.15    2.68   4
  -8   8  -3    6.61    1.86   1
   9  -8   3   23.18    3.60   4
  -9   8  -3   13.07    3.40   1
   9  -8   3   18.83    2.97   1
  12   7  -3   21.94    3.71   1
 -12  -7   3   15.80    3.29   1
 -11  -7   3   11.02    3.14   1
 -11  -7   3    9.30    2.11   3
  10   7  -3  139.64   10.31   1
 -10  -7   3  136.84   10.60   3
 -10  -7   3  147.75   11.03   1
   9   7  -3    1.69    1.45   1
  -9  -7   3    2.52    1.64   3
  -9  -7   3    1.18    2.39   1
   8   7  -3  467.98   32.24   1
  -8  -7   3  492.76   30.21   3
  -8  -7   3  506.42   31.47   1
   7   7  -3  453.97   45.05   1
  -7  -7   3  563.41   38.17   1
  -7  -7   3  538.32   41.66   7
  -7  -7   3  550.60   37.35   3
  -7  -7   3  541.32   58.55   1
   6   7  -3  275.16   18.12   1
  -6  -7   3  246.20   16.89   1
  -6  -7   3  257.31   18.50   7
   6   7  -3  248.30   21.95   3
  -6  -7   3  261.79   17.06   3
  -5  -7   3    0.89    0.82   1
   5   7  -3    0.84    1.02   3
  -5  -7   3    0.48    1.13   3
  -5  -7   3   -0.21    1.71   7
   5   7  -3    1.05    1.87   1
   4   7  -3   63.99    4.84   1
  -4  -7   3   66.78    7.53   7
   4   7  -3   65.14    5.87   3
   4   7  -3   62.11    5.62   1
  -4  -7   3   65.24    5.21   1
  -4  -7   3   57.66    5.42   4
  -3  -7   3    3.42    1.30   4
   3   7  -3    4.19    1.03   3
   3   7  -3    3.96    1.37   1
  -3  -7   3    3.20    1.21   1
  -3  -7   3    2.70    0.87   1
  -3  -7   3    3.78    1.86   7
   2   7  -3   31.01    3.25   7
  -2  -7   3   38.76    2.98   1
   2   7  -3   35.60    3.15   5
  -2  -7   3   40.36    2.92   1
   2   7  -3   44.04    9.31   2
  -2  -7   3   29.56    4.24   7
  -2  -7   3   42.15    4.82   4
   2   7  -3   30.95    3.19   3
   2   7  -3   33.46    4.04   6
   2   7  -3   35.01    2.53   1
  -1  -7   3  110.86    6.75   1
   1   7  -3  122.60    7.80   2
   1   7  -3   95.94    8.42   3
   1   7  -3  112.28    7.27   1
   1   7  -3   90.70    7.87   1
  -1  -7   3   97.93   12.31   4
   1   7  -3  109.09    6.96   5
  -1  -7   3   93.87   10.30   7
   1   7  -3   97.08    7.77   7
  -1  -7   3  103.18    7.46   1
   1   7  -3  101.73    7.16   6
   0  -7   3   40.19    3.79   7
   0  -7   3   37.96    3.47   5
   0   7  -3   44.40    5.73   7
   0   7  -3   40.95    3.94   5
   0   7  -3   42.34    3.88   1
   0  -7   3   37.77    5.21   4
   0   7  -3   40.71    2.97   1
   0  -7   3   57.15    9.20   1
   0  -7   3   41.20    3.19   1
  -1   7  -3    3.18    2.14   7
   1  -7   3    1.19    0.96   5
  -1   7  -3   -0.23    0.36   1
   1  -7   3    0.88    0.90   1
  -1   7  -3    0.03    0.65   1
   1  -7   3    0.43    0.54   1
   2  -7   3    2.14    1.27   5
  -2   7  -3    0.18    0.74   1
   2  -7   3    1.63    0.92   1
  -2   7  -3    1.18    0.64   1
   2  -7   3    0.96    1.01   1
   3  -7   3   24.43    3.20   1
   3  -7   3   23.86    2.20   1
   3  -7   3   27.25    3.32   4
  -3   7  -3   24.63    2.35   1
   3  -7   3   27.28    2.74   5
  -4   7  -3    0.69    1.05   1
   4  -7   3   -1.52    1.54   1
   4  -7   3   -1.48    1.44   4
   4  -7   3    0.74    1.51   5
   4  -7   3    1.12    0.86   1
   5  -7   3    5.66    1.51   1
   5  -7   3    7.78    2.79   4
   5  -7   3    4.35    1.72   5
   6  -7   3   16.67    2.22   1
   6  -7   3   14.69    5.41   1
   7  -7   3   56.72    5.18   1
   7  -7   3   66.43    5.14   4
  -7   7  -3   51.88    6.18   1
   8  -7   3   15.83    2.77   1
  -8   7  -3   18.08    2.96   1
   8  -7   3   14.13    3.36   4
   9  -7   3    7.79    2.32   1
  -9   7  -3    7.84    2.51   1
 -10   7  -3    0.05    1.99   1
  10  -7   3    3.37    1.97   4
  10  -7   3   -1.35    1.62   1
 -12  -6   3    9.85    3.38   1
 -11  -6   3    8.04    2.35   3
  11   6  -3    8.49    2.77   1
  10   6  -3   16.37    3.41   1
 -10  -6   3   11.75    2.31   3
 -10  -6   3   13.20    2.28   1
   9   6  -3    2.64    1.58   1
  -8  -6   3   58.18    4.18   3
  -8  -6   3   47.05    4.54   1
  -7  -6   3   27.30    3.41   3
  -7  -6   3   23.25    3.07   1
   7   6  -3   30.10    2.97   1
  -7  -6   3   25.78    3.45   1
  -6  -6   3    2.15    1.00   1
   6   6  -3    4.65    1.64   1
  -6  -6   3    2.57    1.23   3
   5   6  -3    3.11    1.23   1
   5   6  -3    1.05    1.00   3
  -5  -6   3    0.05    0.76   3
  -5  -6   3    2.70    1.61   7
  -5  -6   3    0.68    0.73   1
  -4  -6   3    1.96    1.08   1
  -4  -6   3    3.91    1.50   3
  -4  -6   3    4.55    1.10   4
  -4  -6   3    1.23    2.05   7
  -4  -6   3    4.35    2.39   1
   4   6  -3    3.62    1.05   1
   4   6  -3    2.61    0.97   1
  -4  -6   3    3.20    1.08   6
   3   6  -3   14.80    1.71   1
  -3  -6   3   14.64    2.57   6
   3   6  -3   13.83    1.53   3
  -3  -6   3   13.00    1.52   1
  -3  -6   3   12.80    2.17   7
   3   6  -3   16.31    1.44   1
  -3  -6   3   17.86    1.85   4
  -2  -6   3  193.21   12.21   7
   2   6  -3  161.23   13.80   6
  -2  -6   3  191.74   12.02   1
   2   6  -3  165.29   11.87   7
   2   6  -3  205.65   44.55   1
   2   6  -3  175.72   13.15   3
   2   6  -3  173.18   10.99   5
  -2  -6   3  163.96   10.85   1
   2   6  -3  177.32   30.67   2
   2   6  -3  182.34   12.14   1
  -2  -6   3  179.85   12.98   4
   1   6  -3  504.59   36.94   6
  -1  -6   3  548.03   35.32   1
  -1  -6   3  706.07  117.96   4
  -1  -6   3  552.54   40.64   7
   1   6  -3  593.60  105.03   2
  -1  -6   3  532.16   35.34   1
   1   6  -3  539.41   43.67   7
   1   6  -3  573.20   40.98   5
   1   6  -3  569.93   38.07   3
   1   6  -3  572.68   43.42   1
   1   6  -3  607.41   37.39   1
   0   6  -3    7.47    0.91   1
   0   6  -3    9.02    1.03   1
   0  -6   3    6.44    1.84   4
   0   6  -3    9.75    0.99   5
   0  -6   3    8.74    0.98   1
   0  -6   3   10.37    1.29   1
   1  -6   3  225.24   16.03   1
  -1   6  -3  224.65   14.52   1
  -1   6  -3  218.15   15.01   1
   1  -6   3  232.69   14.24   1
   1  -6   3  266.04   42.18   4
  -1   6  -3  202.11   19.62   7
   1  -6   3  217.95   13.73   5
   2  -6   3  176.38   35.48   4
   2  -6   3  161.95   12.38   5
  -2   6  -3  178.41   13.64   7
  -2   6  -3  175.45   14.10   1
   2  -6   3  189.35   11.92   1
  -2   6  -3  190.66   11.14   1
   2  -6   3  180.72   14.54   2
   2  -6   3  186.29   14.45   1
  -3   6  -3   17.71    1.85   1
  -3   6  -3   15.34    1.76   1
   3  -6   3   14.73    1.87   1
   3  -6   3   15.74    3.24   4
   3  -6   3   16.85    1.74   5
   3  -6   3   21.41    2.49   1
   4  -6   3   -0.70    0.95   5
  -4   6  -3   -0.18    1.17   1
   4  -6   3    0.49    1.23   1
   4  -6   3   -0.74    0.67   1
   5  -6   3    5.17    1.81   1
   5  -6   3    5.19    2.34   4
   5  -6   3    4.49    1.56   1
  -6   6  -3  359.81   27.61   1
   6  -6   3  357.49   21.83   1
   6  -6   3  275.13   46.38   1
   6  -6   3  371.95   26.39   4
   7  -6   3  301.91   24.14   4
  -7   6  -3  320.36   25.38   1
   7  -6   3  307.21   22.53   1
   8  -6   3   33.82    3.58   1
   8  -6   3   34.66    3.74   4
  -8   6  -3   34.77    3.97   1
   9  -6   3    1.07    2.39   4
   9  -6   3    5.95    2.68   1
  -9   6  -3    1.69    2.17   1
 -10   6  -3    2.23    1.64   1
  10  -6   3    3.47    1.79   4
  12   5  -3   -1.27    2.41   1
 -12  -5   3    4.03    1.94   1
 -11  -5   3    6.87    1.47   3
  11   5  -3    4.25    2.04   1
  10   5  -3    8.92    2.16   1
 -10  -5   3    7.06    2.18   1
 -10  -5   3    6.17    1.89   3
  -9  -5   3   42.84    3.79   3
  -9  -5   3   30.63    4.76   1
   9   5  -3   43.02    4.96   1
  -8  -5   3   38.05    3.75   3
   8   5  -3   27.15    3.06   1
   7   5  -3   59.75    5.42   1
  -7  -5   3   64.88    5.05   1
  -7  -5   3   57.59    4.77   3
  -6  -5   3   80.51    7.10   1
  -6  -5   3  100.25    6.66   1
  -6  -5   3   89.94    8.44   3
   6   5  -3   92.25    6.37   1
   5   5  -3   58.56    4.25   1
  -5  -5   3   62.81    4.96   3
  -5  -5   3   56.41    4.77   1
   5   5  -3   60.35    4.94   4
   5   5  -3   58.92    6.25   1
  -5  -5   3   60.47    4.43   1
   4   5  -3   30.28    2.47   4
  -4  -5   3   25.40    2.64   1
   4   5  -3   26.40    2.14   3
   4   5  -3   25.61    2.61   1
  -4  -5   3   26.72    2.97   7
  -4  -5   3   25.76    2.88   6
  -4  -5   3   29.50    2.26   1
   3   5  -3  343.47   24.89   3
  -3  -5   3  330.05   25.78   3
  -3  -5   3  346.16   26.58   4
  -3  -5   3  328.56   24.96   6
   3   5  -3  350.62   23.33   1
  -3  -5   3  377.86   23.20   1
  -3  -5   3  354.04   28.49   7
   3   5  -3  351.66   24.20   1
  -3  -5   3  370.07   22.40   1
   3   5  -3  344.64   30.26   4
   2   5  -3  534.48   33.73   1
   2   5  -3  581.06   85.14   4
  -2  -5   3  516.99   33.81   1
   2   5  -3  477.40   33.61   5
  -2  -5   3  479.72   39.33   4
   2   5  -3  516.62   34.39   7
   2   5  -3  514.37   32.33   1
  -2  -5   3  605.97  106.29   6
   2   5  -3  529.26   34.74   3
  -2  -5   3  483.15   30.19   1
  -2  -5   3  513.34   35.81   7
   1   5  -3  194.43   21.50   3
   1   5  -3  191.85   11.45   1
   1   5  -3  202.50   24.75   4
  -1  -5   3  168.60   14.43   1
   1   5  -3  168.52   12.20   6
   1   5  -3  205.47   35.91   2
   1   5  -3  174.93   11.87   5
  -1  -5   3  195.85   15.40   7
   1   5  -3  194.26   13.17   1
  -1  -5   3  232.72   34.64   4
   1   5  -3  170.69   13.94   7
   0   5  -3  401.67   29.01   7
   0   5  -3  394.16   32.59   1
   0   5  -3  412.69   27.21   3
   0  -5   3  532.21   79.09   4
   0   5  -3  443.70   45.44   2
   0   5  -3  504.79   67.01   4
   0  -5   3  385.40   27.36   7
   0  -5   3  389.47   25.35   5
   0   5  -3  357.93   25.53   5
   0   5  -3  379.27   26.20   1
   0  -5   3  394.10   25.59   1
   1  -5   3   31.94    2.83   1
   1  -5   3   38.03    4.50   4
   1  -5   3   36.81    3.31   5
  -1   5  -3   37.22    2.79   1
  -1   5  -3   35.61    3.79   7
   1  -5   3   39.38    2.91   1
  -2   5  -3    0.69    0.79   1
   2  -5   3    0.89    0.93   5
   2  -5   3    1.13    0.90   1
  -2   5  -3    2.13    0.79   1
   2  -5   3    0.58    0.74   1
   2  -5   3    0.81    0.87   2
   3  -5   3  102.81   12.23   4
   3  -5   3   92.72   10.04   5
   3  -5   3   86.93    5.74   1
  -3   5  -3   85.57    5.72   1
   3  -5   3   90.00    7.44   2
  -3   5  -3   82.89    5.50   1
   4  -5   3    6.93    2.01   4
   4  -5   3   11.60    1.70   1
  -4   5  -3   12.16    1.87   1
   4  -5   3    6.19    1.53   1
  -5   5  -3    8.99    1.65   1
   5  -5   3    8.02    1.30   1
   5  -5   3    7.12    2.65   4
   6  -5   3   16.00    3.16   1
   6  -5   3   16.41    2.15   1
   6  -5   3   17.15    2.47   4
  -7   5  -3    8.07    2.13   1
   7  -5   3   11.14    2.30   4
  -8   5  -3    4.61    1.57   1
   8  -5   3    3.88    1.98   4
   9  -5   3   -0.10    1.91   4
  -9   5  -3    2.35    1.80   1
   9  -5   3   -1.18    1.45   1
  10  -5   3   23.67    3.72   4
  10  -5   3   17.19    3.38   1
 -11   5  -3   34.74    4.26   1
  11  -5   3   27.30    5.29   4
  12   4  -3    5.39    2.16   1
 -12  -4   3    3.08    1.97   1
 -11  -4   3    8.22    1.98   3
  11   4  -3    5.72    2.55   1
  10   4  -3   19.98    3.03   1
 -10  -4   3   24.20    3.27   3
   9   4  -3   29.77    4.86   1
  -9  -4   3   22.41    3.14   3
   8   4  -3   23.77    3.24   1
  -8  -4   3   19.32    2.87   3
  -7  -4   3   -0.14    0.97   1
  -7  -4   3    1.26    1.12   1
   7   4  -3   -2.05    1.10   1
   6   4  -3   18.61    1.50   4
  -6  -4   3   23.30    2.84   3
  -6  -4   3   19.08    2.18   1
   6   4  -3   15.38    2.12   1
  -5  -4   3   23.35    2.31   1
   5   4  -3   19.56    2.03   1
  -5  -4   3   22.80    1.85   3
   5   4  -3   20.04    1.74   4
   5   4  -3   22.52    2.01   1
  -4  -4   3   25.14    2.32   1
   4   4  -3   17.21    2.48   1
  -4  -4   3   21.78    2.34   3
   4   4  -3   20.72    2.16   1
  -4  -4   3   21.68    2.97   1
   4   4  -3   21.50    1.92   4
   3   4  -3    5.26    1.06   1
  -3  -4   3    5.27    1.62   6
  -3  -4   3    5.41    0.97   1
   3   4  -3    5.40    0.73   1
  -3  -4   3    5.04    1.00   1
  -3  -4   3    3.24    1.48   7
   2   4  -3   63.90    4.97   7
  -2  -4   3   69.48    4.17   1
  -2  -4   3   55.97    5.64   4
  -2  -4   3   62.92    5.51   7
   2   4  -3   60.12    3.87   1
   2   4  -3   57.66    4.43   3
   2   4  -3   55.36    5.14   4
  -2  -4   3   64.69    5.44   6
  -2  -4   3   61.40    4.48   3
  -2  -4   3   58.01    4.19   1
   2   4  -3   62.41    4.48   1
   1   4  -3  115.82    8.82   7
   1   4  -3  101.10    7.54   6
   1   4  -3  106.92    7.96   5
  -1  -4   3  112.37    7.53   1
   1   4  -3  137.20   18.87   4
   1   4  -3   93.50   21.62   1
  -1  -4   3  112.88    8.62   7
   1   4  -3  119.82   11.56   3
   1   4  -3  113.57    7.07   1
  -1  -4   3  110.75    9.12   4
   0   4  -3   62.89    5.08   3
   0  -4   3   59.48    4.70   7
   0   4  -3   66.85    5.55   1
   0   4  -3   64.68   10.53   2
   0   4  -3   62.68    4.02   5
   0   4  -3   76.66   11.21   4
   0  -4   3   71.90    4.15   1
   0   4  -3   60.90    4.09   1
   0   4  -3   67.27    5.88   7
   0  -4   3   61.87    4.53   5
  -1   4  -3   13.51    2.12   7
   1  -4   3   13.58    1.35   1
  -1   4  -3   12.09    1.71   5
   1  -4   3   10.71    1.49   5
  -1   4  -3   11.09    2.02   4
  -1   4  -3   14.47    1.18   1
  -1   4  -3   15.13    1.29   1
   2  -4   3   91.51   13.18   4
  -2   4  -3   79.39    5.18   1
   2  -4   3   83.06    8.89   5
   2  -4   3   84.57    6.51   2
   2  -4   3   71.98    5.27   1
   2  -4   3   78.25    5.08   1
  -2   4  -3   82.80    5.69   1
  -3   4  -3   -0.68    0.48   1
   3  -4   3   -0.45    0.89   4
   3  -4   3   -0.17    0.63   2
   3  -4   3   -0.58    0.52   1
  -3   4  -3   -0.75    0.56   1
   3  -4   3   -0.75    0.86   1
   4  -4   3   10.55    2.25   4
   4  -4   3   10.48    2.25   1
   4  -4   3    8.06    1.31   1
  -4   4  -3    9.13    1.35   1
  -4   4  -3   10.78    2.38   1
  -5   4  -3  177.76   11.08   1
   5  -4   3  179.71   10.52   1
   5  -4   3  160.73   12.83   1
   5  -4   3  169.76   14.09   4
   6  -4   3    4.39    1.41   1
  -6   4  -3    2.25    1.11   1
   6  -4   3    3.45    1.76   4
   7  -4   3  278.22   18.13   1
  -7   4  -3  237.67   19.24   1
   7  -4   3  239.62   18.85   4
  -8   4  -3    6.51    2.52   1
   8  -4   3    5.44    1.96   1
   9  -4   3   25.15    3.45   1
   9  -4   3   29.76    3.44   4
  -9   4  -3   24.45    4.49   1
  10  -4   3   -0.89    2.07   1
  10  -4   3    0.38    1.85   4
 -10   4  -3   -2.27    1.45   1
  11  -4   3    1.10    2.21   4
 -11   4  -3    7.27    2.88   1
  12   3  -3    8.75    2.54   1
  11   3  -3   -0.13    2.09   1
 -11  -3   3    2.63    1.46   3
 -10  -3   3   33.75    3.42   3
   9   3  -3   12.59    1.05   4
  -8  -3   3    1.39    1.41   3
   8   3  -3    2.06    1.48   1
  -8  -3   3    2.94    1.54   1
  -7  -3   3    3.16    1.42   3
  -7  -3   3    4.66    1.27   1
  -7  -3   3    6.89    1.46   1
  -6  -3   3   77.85    5.64   1
  -6  -3   3   65.80    5.28   1
  -6  -3   3   88.15    5.88   3
   6   3  -3   81.85    6.01   1
   5   3  -3  298.86   20.01   1
  -5  -3   3  258.54   17.55   1
   5   3  -3  262.57   20.62   1
  -5  -3   3  260.38   17.22   3
  -5  -3   3  286.13   18.38   1
  -4  -3   3   48.84    3.62   3
  -4  -3   3   40.84    3.31   1
  -4  -3   3   42.00    3.47   1
   4   3  -3   50.70    3.33   1
   4   3  -3   43.37    3.91   1
   4   3  -3   44.17    3.89   4
  -3  -3   3   27.29    2.21   3
   3   3  -3   27.90    2.37   3
   3   3  -3   22.32    2.29   4
  -3  -3   3   20.94    2.26   1
  -3  -3   3   25.10    2.25   1
   3   3  -3   30.00    2.57   1
   3   3  -3   27.49    2.56   1
   2   3  -3  501.29   32.52   3
  -2  -3   3  492.41   33.40   7
   2   3  -3  481.83   32.05   1
  -2  -3   3  471.89   36.75   4
  -2  -3   3  458.32   31.62   1
  -2  -3   3  455.73   33.13   6
  -2  -3   3  471.15   29.71   1
   2   3  -3  469.66   39.43   4
  -2  -3   3  534.72   30.42   3
   2   3  -3  463.04   31.73   1
  -1  -3   3  467.95   36.86   7
   1   3  -3  518.19   33.28   1
   1   3  -3  500.75   34.09   6
  -1  -3   3  483.02   37.77   4
   1   3  -3  500.45   31.00   7
   1   3  -3  487.47   33.23   3
   1   3  -3  478.62   33.81   5
   1   3  -3  481.67   33.07   1
  -1  -3   3  526.27   32.30   1
  -1  -3   3  497.65   33.19   3
   0  -3   3 1996.96  129.53   5
   0   3  -3 2067.09  150.72   7
   0   3  -3 1943.81  134.18   5
   0   3  -3 2315.02  387.44   2
   0  -3   3 2010.23  122.32   7
   0   3  -3 2381.50  273.72   3
   0   3  -3 1939.90  142.52   1
  -1   3  -3   46.92    3.46   2
  -1   3  -3   42.89    5.42   4
   1  -3   3   37.39    3.32   5
  -1   3  -3   35.92    2.51   1
   1  -3   3   41.45    5.85   4
  -1   3  -3   39.94    2.96   5
  -1   3  -3   40.16    3.82   7
   1  -3   3   38.47    2.89   1
  -1   3  -3   41.05    2.95   1
  -2   3  -3  170.39   10.69   1
   2  -3   3  156.27   14.89   4
   2  -3   3  168.48    9.74   1
  -2   3  -3  160.02   12.71   4
  -2   3  -3  167.48   10.69   1
   2  -3   3  141.81   10.86   1
   2  -3   3  159.11   13.64   2
   2  -3   3  172.87   11.15   5
   3  -3   3   13.93    1.70   1
   3  -3   3   15.92    1.82   4
  -3   3  -3   17.01    1.68   1
  -3   3  -3   18.20    1.89   1
   3  -3   3   17.62    1.45   1
   4  -3   3   27.61    3.15   1
   4  -3   3   25.73    3.30   4
   4  -3   3   24.14    2.70   1
  -4   3  -3   28.78    3.62   1
   5  -3   3  158.76   12.81   1
   5  -3   3  178.00   12.01   1
   5  -3   3  187.14   13.74   4
  -5   3  -3  188.78   11.39   1
   6  -3   3   56.07    4.69   1
   6  -3   3   56.74    4.43   1
  -6   3  -3   50.59    5.20   1
   6  -3   3   59.96    4.23   4
  -7   3  -3   14.98    2.35   1
   7  -3   3   14.05    2.17   4
  -8   3  -3    9.69    1.82   1
   8  -3   3   10.03    2.20   1
   8  -3   3    9.05    2.62   4
   9  -3   3    0.04    1.61   1
   9  -3   3    0.26    1.00   4
  -9   3  -3   -0.03    1.40   1
  10  -3   3    2.46    2.14   1
  10  -3   3    1.63    1.80   4
  11  -3   3    3.99    2.57   1
 -11   3  -3    2.17    2.00   1
 -12   3  -3   13.18    3.57   1
  12   2  -3   11.43    3.36   1
 -12  -2   3   16.43    3.46   1
  11   2  -3    7.64    2.33   1
 -11  -2   3    9.71    1.74   3
 -11  -2   3   12.18    2.42   1
 -10  -2   3   36.48    4.77   1
 -10  -2   3   52.24    4.20   3
   9   2  -3   25.69    2.98   1
  -9  -2   3   23.87    2.36   3
  -9  -2   3   29.41    3.12   1
   9   2  -3   23.93    2.65   4
   8   2  -3    6.88    1.06   4
  -8  -2   3    5.45    1.66   1
  -7  -2   3    1.66    1.25   1
   7   2  -3    1.99    1.54   1
  -6  -2   3    8.25    2.09   1
  -6  -2   3    8.07    2.25   1
   6   2  -3    5.81    2.11   1
  -5  -2   3   16.23    1.72   3
   5   2  -3   16.63    1.63   1
  -5  -2   3   14.24    5.65   1
  -5  -2   3   11.59    3.34   1
   5   2  -3   20.23    3.56   1
   4   2  -3  134.67   10.05   1
  -4  -2   3  113.72   22.51   1
  -4  -2   3  118.50    8.05   1
  -4  -2   3  121.14    7.94   3
   4   2  -3  123.63    8.28   1
   3   2  -3   85.02    6.27   1
  -3  -2   3   80.55    5.43   1
  -3  -2   3   83.46    6.20   3
  -3  -2   3   83.12    5.84   1
   3   2  -3   89.98    5.99   1
  -2  -2   3   22.10    2.07   1
  -2  -2   3   21.08    3.19   6
  -2  -2   3   18.82    1.97   3
   2   2  -3   20.72    1.83   1
  -2  -2   3   19.17    1.63   1
   2   2  -3   17.11    1.92   3
   2   2  -3   22.07    1.80   1
   2   2  -3   21.73    2.21   4
   1   2  -3  296.97   29.56   4
  -1  -2   3  197.81   15.68   1
   1   2  -3  256.14   19.70   6
   1   2  -3  254.58   16.31   7
  -1  -2   3  257.02   24.82   6
   1   2  -3  198.90   15.16   1
  -1  -2   3  200.33   15.99   4
   1   2  -3  212.75   18.43   1
   1   2  -3  252.50   15.47   3
  -1  -2   3  241.89   14.59   3
  -1  -2   3  260.79   18.07   7
   0   2  -3  140.41   10.31   7
   0   2  -3  166.19   14.30   4
   0   2  -3  150.40   11.32   3
   0  -2   3  138.10    9.56   7
   0  -2   3  151.06   10.58   3
   1  -2   3    0.99    0.74   1
  -1   2  -3    1.87    0.93   2
  -1   2  -3   -0.24    1.13   4
   1  -2   3   -1.31    1.10   4
  -1   2  -3   -0.16    0.39   1
  -1   2  -3    0.57    0.69   5
  -1   2  -3    0.50    0.37   1
   1  -2   3    0.67    0.88   5
   1  -2   3   -0.18    0.63   2
   2  -2   3   21.35    2.00   2
   2  -2   3   20.08    2.13   1
  -2   2  -3   26.47    3.65   4
   2  -2   3   18.99    2.03   4
   2  -2   3   21.95    2.19   1
  -3   2  -3  110.27    7.90   1
   3  -2   3  110.70    7.18   1
   3  -2   3  114.91    7.15   1
  -3   2  -3  116.92   12.56   4
  -3   2  -3  110.70    8.18   1
   3  -2   3  110.45    7.87   4
  -4   2  -3  316.57   22.11   1
   4  -2   3  345.47   21.53   1
   4  -2   3  329.19   20.25   1
  -4   2  -3  293.10   19.45   1
   4  -2   3  319.02   23.23   4
  -5   2  -3   74.89    5.19   1
   5  -2   3   67.12    5.59   4
  -5   2  -3   63.81    4.72   1
   5  -2   3   67.35    5.34   1
   5  -2   3   61.82    4.80   1
  -6   2  -3   23.39    2.56   1
   6  -2   3   21.58    2.85   4
   6  -2   3   22.90    2.38   1
   7  -2   3    8.94    1.74   4
   7  -2   3    7.49    1.68   1
   8  -2   3   21.47    2.72   4
  -8   2  -3   17.82    2.35   1
   9  -2   3    2.80    1.83   4
  -9   2  -3    3.25    1.70   1
   9  -2   3    0.87    1.51   1
  10  -2   3   27.57    5.17   4
  10  -2   3   26.07    3.82   1
 -10   2  -3   32.91    4.05   1
 -11   2  -3   43.68    4.59   1
  11  -2   3   41.03    5.40   1
  12  -2   3   20.01    3.45   1
 -12   2  -3   25.47    4.41   1
 -12  -1   3    7.41    3.58   1
  12   1  -3   11.57    2.80   1
  11   1  -3    0.19    1.96   1
 -11  -1   3    5.45    2.54   1
  10   1  -3    2.22    1.14   4
   9   1  -3   -0.55    0.69   4
   9   1  -3    2.44    1.60   1
  -8  -1   3   45.28    3.61   1
   8   1  -3   33.90    3.88   1
  -7  -1   3   10.34    2.07   1
  -6  -1   3  109.11   13.09   1
   6   1  -3  103.22    9.66   1
  -6  -1   3  108.38   10.17   1
  -5  -1   3    0.57    1.29   1
   5   1  -3    0.53    0.95   1
   5   1  -3    0.90    0.96   1
  -4  -1   3  251.65   15.41   1
   4   1  -3  247.68   17.10   1
  -4  -1   3  225.74   16.06   1
   3   1  -3  733.71   43.72   1
  -3  -1   3  739.97   44.67   1
   3   1  -3  703.79   45.76   1
  -3  -1   3  687.07   44.99   1
  -2  -1   3  393.79   24.09   1
   2   1  -3  369.93   25.22   1
  -2  -1   3  397.03   25.45   1
   2   1  -3  394.27   26.16   1
   1   1  -3  473.68   32.42   3
  -1  -1   3  498.37   30.70   1
   1   1  -3  468.28   30.14   1
  -1  -1   3  508.56   32.73   3
   1   1  -3  505.82   37.44   1
  -1  -1   3  429.51   28.25   1
  -1  -1   3  444.96   35.07   7
   0   1  -3 1882.14  128.61   5
   0  -1   3 1987.83  136.29   3
   0   1  -3 2003.71  136.68   3
   0   1  -3 2067.05  142.39   7
   0  -1   3 2007.56  145.27   7
   0  -1   3 2123.28  140.39   5
  -1   1  -3  282.12   21.91   4
   1  -1   3  283.14   19.93   1
  -1   1  -3  292.02   20.48   1
  -1   1  -3  353.19   28.89   3
  -1   1  -3  294.26   19.32   1
   1  -1   3  288.73   19.29   1
   2  -1   3   62.01    5.64   2
  -2   1  -3   64.91    4.84   4
   2  -1   3   60.13    4.50   1
  -2   1  -3   55.54    4.51   1
   2  -1   3   74.62    4.81   4
   2  -1   3   65.48    4.31   1
  -2   1  -3   66.12    4.62   1
  -3   1  -3  657.61   39.67   1
   3  -1   3  676.17   41.36   1
  -3   1  -3  615.13   49.18   4
  -3   1  -3  617.69   42.64   1
   3  -1   3  664.36   42.79   1
   3  -1   3  609.85   44.39   4
  -4   1  -3  555.87   40.63   1
   4  -1   3  535.78   39.81   4
  -4   1  -3  515.89   33.69   1
   4  -1   3  567.30   37.25   1
   4  -1   3  529.51   39.09   1
   5  -1   3   -0.15    1.16   1
  -5   1  -3   -0.92    1.23   1
   5  -1   3   -0.06    1.26   1
   5  -1   3    0.17    0.69   4
   6  -1   3   17.68    2.08   1
   6  -1   3   19.85    2.01   4
   6  -1   3   19.55    3.02   1
  -6   1  -3   18.56    2.09   1
   7  -1   3   63.60    6.95   1
   7  -1   3   72.80    6.20   4
  -7   1  -3   64.97    6.60   1
   8  -1   3  380.12   29.67   4
  -8   1  -3  373.07   25.61   1
   8  -1   3  351.93   25.04   1
   9  -1   3   59.26    5.77   4
   9  -1   3   63.49    5.27   1
  -9   1  -3   62.11    5.92   1
 -10   1  -3    8.16    1.90   1
  10  -1   3    7.75    2.99   1
  10  -1   3    4.82    1.68   4
  11  -1   3   10.92    2.56   1
 -11   1  -3    9.55    2.89   1
  12  -1   3   35.69    4.85   1
  12   0  -3    0.12    2.01   1
 -12   0   3    7.35    3.42   1
 -11   0   3   10.16    2.36   1
 -10   0   3   11.34    2.90   1
  10   0  -3    7.92    2.16   1
  10   0  -3   10.52    1.50   4
   8   0  -3  103.29    8.40   1
  -8   0   3   93.80    6.51   1
   7   0  -3   79.63    6.96   1
  -7   0   3   67.10    6.75   1
   6   0  -3   39.69    4.61   1
  -6   0   3   29.18    3.65   1
  -6   0   3   31.10    3.34   1
  -5   0   3    2.94    0.90   1
  -5   0   3    4.05    1.05   1
   5   0  -3    2.56    1.23   1
   5   0  -3    2.75    1.15   1
  -4   0   3   25.73    2.42   1
   4   0  -3   26.17    2.28   1
   4   0  -3   27.74    2.30   1
   3   0  -3   15.47    2.36   1
  -3   0   3   15.57    5.96   1
  -3   0   3   12.25    3.43   1
   3   0  -3   12.95    1.74   1
   2   0  -3   38.56    2.68   1
  -2   0   3   39.21    2.71   1
  -2   0   3   39.09    2.51   1
   2   0  -3   37.87    2.53   1
  -1   0   3   84.99    8.80   6
   1   0  -3   71.14    7.15   1
   1   0  -3   64.79    4.49   1
  -1   0   3   65.21    4.68   1
  -1   0   3   76.77    4.88   1
   0   0  -3   88.52    6.90   7
   0   0  -3  113.59    6.89   5
   0   0   3  101.93    7.59   1
   0   0   3   86.08    7.59   1
   0   0   3  102.29    7.09   5
   0   0  -3  105.62    6.64   1
   0   0   3  110.77    7.29   7
   0   0  -3   91.57    6.15   1
   0   0   3  113.62    7.29   3
   1   0   3  505.59   44.11   5
   1   0   3  410.07   29.07   3
  -1   0  -3  400.98   28.56   3
  -1   0  -3  412.96   30.72   4
  -1   0  -3  423.84   27.88   1
  -1   0  -3  443.17   29.27   1
   1   0   3  442.56   28.36   1
   2   0   3  154.25   12.08   4
   2   0   3  160.91   10.17   1
   2   0   3  157.18    9.81   1
  -2   0  -3  170.57   10.50   1
  -2   0  -3  146.94   11.73   4
  -2   0  -3  170.32   10.03   1
   3   0   3   65.87    5.44   4
  -3   0  -3   71.05    4.68   1
  -3   0  -3   73.39    4.45   1
   3   0   3   68.13    4.67   1
  -3   0  -3   64.31    5.31   4
   3   0   3   68.86    4.82   1
   4   0   3  193.71   12.52   1
  -4   0  -3  174.86   11.64   1
   4   0   3  186.07   13.57   4
   4   0   3  192.45   12.34   1
  -4   0  -3  180.88   11.31   1
  -4   0  -3  167.41   13.27   4
  -5   0  -3  221.10   14.51   1
   5   0   3  231.27   14.45   1
   5   0   3  230.93   14.91   1
  -5   0  -3  201.61   14.71   1
   5   0   3  209.98   16.63   4
   6   0   3  421.63   29.55   4
  -6   0  -3  369.86   25.05   1
   6   0   3  416.05   29.19   1
   6   0   3  425.40   25.53   1
   7   0   3  149.40    9.74   1
  -7   0  -3  141.19    9.27   1
   7   0   3  153.79   11.50   4
   8   0   3  263.40   18.85   1
   8   0   3  229.52   21.25   4
  -8   0  -3  255.10   16.61   1
   9   0   3   60.22    5.12   4
  -9   0  -3   61.05    6.63   1
   9   0   3   55.72    5.04   1
  10   0   3   47.07    6.17   1
  10   0   3   45.25    5.38   4
 -10   0  -3   53.20    5.72   1
  11   0   3    0.77    2.55   1
  12   0   3    7.15    2.50   1
 -12   1   3   -2.32    2.35   1
  12  -1  -3   -0.53    1.87   1
  11  -1  -3    2.81    2.31   1
 -11   1   3    1.40    3.04   1
  10  -1  -3    5.31    1.56   4
  10  -1  -3    8.60    2.17   1
  -9   1   3    1.01    1.81   1
   9  -1  -3    1.98    1.19   4
  -8   1   3   70.47    7.37   1
   7  -1  -3   20.83    2.51   1
  -7   1   3   28.65    2.99   1
   6  -1  -3   27.01    2.74   1
  -6   1   3   29.08    2.92   1
  -5   1   3   51.48    4.07   1
  -5   1   3   51.26    3.85   1
   5  -1  -3   43.96    4.34   1
   5  -1  -3   56.01    3.89   1
  -4   1   3  113.88    7.08   1
   4  -1  -3   98.79    7.60   1
  -4   1   3  115.56    7.17   1
   4  -1  -3  105.36    7.29   1
  -3   1   3   56.68    4.13   1
  -3   1   3   49.97    3.75   1
   3  -1  -3   56.13    3.92   1
   3  -1  -3   48.42    3.96   1
  -2   1   3    0.78    0.89   1
   2  -1  -3    0.29    1.23   1
   2  -1  -3   -0.34    0.92   1
  -1   1   3   15.34    1.44   1
  -1   1   3   18.13    1.64   1
   1  -1  -3   15.47    1.58   1
   1  -1  -3   16.67    1.73   1
   0  -1  -3  969.87   59.43   1
   0   1   3  965.05   66.84   5
   0  -1  -3  948.59   61.97   5
   0  -1  -3 1031.75   63.85   1
   0   1   3  904.06   67.63   1
  -1  -1  -3  927.81   55.55   1
   1   1   3  846.52   58.91   1
  -1  -1  -3  917.54   58.61   1
   1   1   3  882.73   55.01   1
  -2  -1  -3 5199.87  337.92   1
   2   1   3 5281.74  327.06   1
  -2  -1  -3 4691.80  328.79   1
   2   1   3 4389.21  337.62   1
  -3  -1  -3   33.59    2.65   4
   3   1   3   32.22    3.09   1
   3   1   3   32.33    2.58   1
  -3  -1  -3   38.31    3.16   1
  -3  -1  -3   36.19    2.82   1
   4   1   3 1259.68   96.05   4
  -4  -1  -3 1251.29   86.65   1
  -4  -1  -3 1237.37   93.91   4
   4   1   3 1301.42   73.55   1
   4   1   3 1073.19   87.34   1
   5   1   3 1093.33   85.55   4
   5   1   3 1101.36   65.67   1
  -5  -1  -3 1178.15   66.99   1
   5   1   3 1103.38   67.30   1
  -5  -1  -3 1093.66   68.00   1
   6   1   3   16.77    2.72   1
   6   1   3   12.37    4.08   4
  -6  -1  -3   18.05    4.71   1
   6   1   3   13.36    1.72   1
  -7  -1  -3   88.80    7.00   1
   7   1   3   84.49    6.75   4
   7   1   3   88.28    6.35   1
   8   1   3    6.93    1.69   4
   8   1   3    1.30    2.65   1
   9   1   3    4.21    1.78   1
  10   1   3   12.22    1.59   4
 -11  -1  -3    7.00    2.40   1
  11   1   3    5.59    2.75   1
 -12  -1  -3    8.09    2.32   1
 -13  -1  -3   15.54    4.86   1
  13   1   3   15.42    3.83   1
 -12   2   3   11.47    4.05   1
  12  -2  -3   11.16    3.37   1
 -11   2   3   20.52    3.11   1
  11  -2  -3   17.96    3.13   1
  10  -2  -3   18.81    3.08   1
  10  -2  -3   19.85    2.70   4
   9  -2  -3   -0.60    1.78   4
  -9   2   3   -2.32    1.38   1
   9  -2  -3    2.00    1.66   1
  -8   2   3   17.79    2.90   1
  -7   2   3   34.75    5.29   1
   6  -2  -3    1.75    1.57   1
  -6   2   3    1.61    1.03   1
   5  -2  -3    3.45    1.19   1
  -5   2   3    5.30    1.26   1
   5  -2  -3    5.90    1.52   1
  -5   2   3    4.37    1.13   1
  -4   2   3  167.70   10.89   1
  -4   2   3  141.04    9.53   1
   4  -2  -3  151.84    9.80   1
   4  -2  -3  147.37    9.65   1
  -3   2   3  747.77   52.90   1
   3  -2  -3  685.27   49.80   1
  -3   2   3  794.01   52.28   1
   3  -2  -3  747.66   47.34   1
  -2   2   3  114.88    7.70   1
  -2   2   3  116.92    7.49   1
   2  -2  -3  131.75   12.80   1
   2  -2  -3  135.46    8.51   1
   1  -2  -3 1726.31  116.96   1
  -1   2   3 1427.88  124.17   1
  -1   2   3 1930.01  112.00   1
   1  -2  -3 1826.15  110.87   1
   0  -2  -3    0.46    0.59   1
   0   2   3   -0.93    0.91   1
   0  -2  -3   -0.03    0.62   1
   0  -2  -3    0.19    0.22   5
   0   2   3   -0.13    0.54   1
   1   2   3    1.58    1.83   1
   1   2   3   -0.68    0.50   1
  -1  -2  -3   -1.03    0.91   1
  -1  -2  -3   -1.22    0.91   1
  -2  -2  -3  176.36   10.58   1
  -2  -2  -3  166.93   10.69   1
   2   2   3  172.48   11.09   1
   2   2   3  166.39   11.57   1
  -3  -2  -3   75.19    5.42   1
  -3  -2  -3   77.83    6.16   1
   3   2   3   73.13    4.96   1
   4   2   3   49.82    3.91   1
  -4  -2  -3   43.72    3.36   4
  -4  -2  -3   43.32    3.27   1
  -4  -2  -3   40.69    3.06   1
  -4  -2  -3   42.33    2.95   3
   4   2   3   47.26    3.45   1
   5   2   3   21.27    3.09   1
  -5  -2  -3   17.93    3.12   1
  -5  -2  -3   21.50    1.82   4
  -5  -2  -3   19.26    2.30   1
  -5  -2  -3   19.65    1.38   3
  -6  -2  -3   59.43    5.20   1
   6   2   3   68.31    5.19   1
  -6  -2  -3   53.94    4.36   1
   6   2   3   60.93    4.66   1
   7   2   3    6.59    2.28   1
  -7  -2  -3    7.39    1.62   1
   8   2   3    5.23    2.39   1
  -8  -2  -3    5.12    1.54   1
  -9  -2  -3    8.72    1.85   1
   9   2   3   11.22    2.29   1
  10   2   3   -2.63    1.99   1
 -11  -2  -3   40.56    5.12   1
 -13  -2  -3   -1.73    3.07   1
  13   2   3    3.16    2.90   1
 -11   3   3   -1.69    2.62   1
  11  -3  -3   -0.47    2.73   1
  10  -3  -3    1.30    1.22   4
  10  -3  -3    4.01    2.42   1
 -10   3   3    0.76    1.70   1
  -9   3   3    0.88    1.77   1
   9  -3  -3    2.57    1.71   1
  -8   3   3    4.78    2.01   1
  -7   3   3    1.20    2.07   1
   7  -3  -3    1.50    1.88   1
  -6   3   3   32.63    5.12   1
   6  -3  -3   22.51    2.85   1
  -5   3   3    3.84    1.25   1
   5  -3  -3    4.13    1.05   1
   5  -3  -3    3.65    1.50   1
  -4   3   3  411.17   29.07   1
   4  -3  -3  390.85   23.35   1
   4  -3  -3  405.66   34.96   1
  -4   3   3  415.79   26.78   1
  -3   3   3  466.09   29.19   1
  -3   3   3  447.11   28.96   1
   3  -3  -3  464.09   31.09   1
   3  -3  -3  447.91   32.01   1
  -2   3   3  887.85   50.50   1
  -2   3   3  841.82   52.54   1
   2  -3  -3  855.01   80.26   1
   2  -3  -3  838.34   56.25   1
   1  -3  -3 2324.22  148.59   1
  -1   3   3 2445.51  153.45   1
   1  -3  -3 2522.94  180.02   1
   0   3   3   11.78    1.82   1
   0   3   3    8.41    1.00   7
   0  -3  -3    8.62    1.07   1
   0  -3  -3    9.06    1.31   1
   0   3   3   10.32    1.96   1
   1   3   3   60.60    5.16   1
  -1  -3  -3   78.79    5.25   1
  -1  -3  -3   73.64    5.24   7
   1   3   3   73.94    4.80   1
  -2  -3  -3    0.16    1.29   1
   2   3   3   -1.31    0.85   1
   2   3   3   -0.63    0.64   1
  -2  -3  -3   -0.11    1.13   1
  -3  -3  -3  284.22   20.77   1
  -3  -3  -3  319.67   18.69   1
   3   3   3  336.11   19.39   1
   3   3   3  311.69   19.01   1
   3   3   3  310.91   20.39   3
   4   3   3   52.44    4.36   1
  -4  -3  -3   55.40    4.15   1
  -4  -3  -3   62.81    4.32   1
  -5  -3  -3  131.85    8.71   3
   5   3   3  138.01    9.18   1
  -5  -3  -3  131.49    9.51   4
  -5  -3  -3  113.43    9.37   1
  -6  -3  -3  337.69   24.74   1
  -6  -3  -3  340.17   21.49   3
   6   3   3  348.21   24.73   1
  -6  -3  -3  363.66   21.54   1
  -7  -3  -3  212.91   15.38   3
  -7  -3  -3  209.89   14.84   1
   7   3   3  230.36   15.19   1
   8   3   3   84.85    6.58   1
  -8  -3  -3   76.21    7.21   1
  -8  -3  -3   86.73    5.54   3
  -9  -3  -3    2.85    1.71   1
  -9  -3  -3    5.07    1.12   3
   9   3   3    5.45    2.11   1
 -10  -3  -3   27.31    3.88   1
 -10  -3  -3   27.46    4.02   3
  11   3   3   17.61    4.57   1
 -12  -3  -3   -1.70    1.84   1
  12   3   3   -2.43    2.78   1
  13   3   3    1.74    2.24   1
 -13  -3  -3    7.94    3.05   1
  11  -4  -3    3.04    2.23   1
 -11   4   3    7.16    2.43   1
  10  -4  -3  148.69   13.81   1
 -10   4   3  127.32   11.89   1
  10  -4  -3  107.48   11.19   4
  -9   4   3   10.45    2.26   1
   9  -4  -3    7.59    2.22   1
   8  -4  -3    8.19    2.32   4
  -8   4   3    7.22    2.00   1
   8  -4  -3    6.02    2.17   1
  -7   4   3  614.54   38.36   1
   7  -4  -3  553.99   38.96   1
  -6   4   3   46.63    4.14   1
   6  -4  -3   47.56    3.85   1
   4  -4  -3  278.87   16.94   1
   4  -4  -3  241.39   25.41   1
  -4   4   3  282.68   18.77   1
  -3   4   3  915.07   55.75   1
   3  -4  -3  920.21   55.65   1
  -3   4   3  900.92   58.10   1
   3  -4  -3  883.45   62.52   1
   2  -4  -3  139.74   10.03   1
  -2   4   3  143.78    9.15   1
   2  -4  -3  149.50   10.34   1
  -2   4   3  137.57    9.88   1
   1  -4  -3 2030.15  127.57   1
   1  -4  -3 1967.14  127.70   1
  -1   4   3 2077.69  152.95   1
  -1   4   3 2127.31  133.37   1
   0  -4  -3  111.58    7.48   1
   0  -4  -3  118.24    7.56   1
   0   4   3  118.27    8.27   7
   0   4   3  120.84    7.50   1
   1   4   3  149.86   10.57   7
  -1  -4  -3  158.09   11.35   1
   1   4   3  158.72    9.85   1
  -1  -4  -3  135.36   10.20   7
   1   4   3  152.56    9.77   1
   2   4   3   59.73    3.95   1
  -2  -4  -3   60.33    5.06   1
  -2  -4  -3   54.13    5.06   1
   2   4   3   72.83   19.50   1
   3   4   3  119.55    7.76   1
   3   4   3  107.76    7.41   3
   3   4   3   81.96   21.96   2
   3   4   3  131.03    9.59   1
  -3  -4  -3  116.88    7.58   1
   4   4   3   99.84    6.18   3
  -4  -4  -3   87.40    6.99   1
   4   4   3   87.75    6.25   1
   4   4   3  101.86    7.48   1
  -4  -4  -3   97.63    6.77   1
  -5  -4  -3   19.32    1.87   1
   5   4   3   16.19    2.12   1
  -5  -4  -3   16.72    1.30   4
  -5  -4  -3   16.44    2.12   1
   5   4   3   20.26    1.86   1
  -6  -4  -3   28.68    2.29   3
   6   4   3   37.25    4.01   1
  -6  -4  -3   37.23    3.01   1
  -7  -4  -3    4.05    0.78   3
  -7  -4  -3    3.47    1.69   1
   7   4   3    0.78    1.84   1
  -8  -4  -3    7.68    2.27   1
   8   4   3    9.71    2.81   1
  -8  -4  -3    8.65    1.52   3
   9   4   3   52.26    4.79   1
  -9  -4  -3   67.80    7.03   1
  -9  -4  -3   60.02    5.10   3
 -10  -4  -3    1.84    0.67   3
 -10  -4  -3    3.96    1.73   1
  11   4   3    6.84    2.87   1
  13   4   3   -3.81    2.20   1
  11  -5  -3    3.25    2.38   1
 -11   5   3   11.45    3.35   1
  10  -5  -3    1.38    2.39   4
 -10   5   3    3.43    2.84   1
  -9   5   3    0.18    2.15   1
   9  -5  -3    1.73    1.84   4
   9  -5  -3    2.41    2.79   1
   8  -5  -3   11.28    2.88   1
  -8   5   3    5.26    2.35   1
   8  -5  -3    7.38    1.82   4
  -7   5   3    6.41    2.55   1
  -6   5   3    9.35    1.69   1
   6  -5  -3    8.93    2.47   1
   5  -5  -3   14.59    1.93   1
   4  -5  -3    1.54    0.93   1
  -4   5   3   -0.38    0.80   1
   4  -5  -3   -0.42    0.89   1
  -3   5   3  121.05   10.04   1
   3  -5  -3  137.74    9.14   1
   3  -5  -3  116.90    8.28   1
  -3   5   3  137.86    9.31   1
   2  -5  -3  119.24    7.88   1
  -2   5   3  117.28   10.89   1
  -2   5   3  111.36    7.72   1
   2  -5  -3   97.62    8.66   1
   1  -5  -3  296.73   19.04   1
  -1   5   3  297.38   21.88   1
   1  -5  -3  283.01   19.15   1
  -1   5   3  321.41   21.06   1
  -1   5   3  290.62   21.36   7
   0  -5  -3  153.27    9.37   1
   0  -5  -3  153.28   10.58   1
   0   5   3  156.22   11.79   7
   0   5   3  159.12   10.69   1
  -1  -5  -3   39.09    2.79   6
  -1  -5  -3   39.60    3.51   7
   1   5   3   44.40    3.44   1
   1   5   3   34.30    3.35   1
   1   5   3   31.76    2.75   7
   1   5   3   39.37    2.38   5
   2   5   3  212.89   16.99   1
   2   5   3  248.98   91.38   1
  -2  -5  -3  275.13   17.33   1
  -2  -5  -3  252.13   17.91   7
  -2  -5  -3  269.34   16.53   1
   3   5   3  132.84    9.97   2
   3   5   3  137.52    8.96   1
  -3  -5  -3  144.45    8.83   1
  -3  -5  -3  137.78    9.40   1
   3   5   3  122.93    9.11   1
  -4  -5  -3    6.87    1.79   1
  -4  -5  -3    6.81    1.21   1
   4   5   3    5.44    2.11   2
   4   5   3    8.73    1.30   1
   5   5   3    3.32    1.62   1
  -5  -5  -3    5.62    1.58   1
   5   5   3    6.58    0.90   3
   6   5   3  277.02   18.26   1
   7   5   3   -1.37    1.07   1
  -7  -5  -3    0.59    0.52   3
  -7  -5  -3    2.08    1.37   1
  -8  -5  -3   86.73    6.29   3
   8   5   3   88.41    7.45   1
  -8  -5  -3   86.53    6.97   1
  -9  -5  -3    2.95    1.60   1
  -9  -5  -3    1.56    0.73   3
   9   5   3    2.67    1.59   1
  10   5   3   90.79    7.84   1
 -10  -5  -3   70.60    6.41   3
  11   5   3   18.77    3.78   1
 -12  -5  -3    6.64    2.15   1
 -13  -5  -3   16.95    3.52   1
  13   5   3   17.06    4.09   1
 -10   6   3    2.93    2.00   1
  10  -6  -3    7.90    3.14   1
   9  -6  -3   24.65    3.65   4
  -9   6   3   34.29    4.55   1
   9  -6  -3   28.70    3.87   1
   8  -6  -3   34.84    4.71   4
   8  -6  -3   39.17    4.37   1
   7  -6  -3   34.70    4.26   1
  -6   6   3   28.72    4.92   1
  -5   6   3   12.40    2.38   1
   4  -6  -3    2.36    1.00   1
   4  -6  -3    3.07    1.22   1
  -4   6   3    2.01    1.19   1
  -3   6   3  112.49    9.66   1
   3  -6  -3  142.66   10.63   1
   3  -6  -3  109.68   10.23   1
   2  -6  -3  678.32   49.26   1
  -2   6   3  647.47   78.76   1
  -2   6   3  649.32   48.70   1
   2  -6  -3  669.15   44.96   1
   1  -6  -3   43.18    4.21   1
  -1   6   3   58.57    6.07   1
  -1   6   3   45.76    4.59   7
   1  -6  -3   60.17    5.33   1
   1  -6  -3   56.33    3.49   5
   0   6   3  319.76   21.89   7
   0   6   3  325.73   23.81   6
   0   6   3  376.39   22.63   1
   0  -6  -3  337.93   23.80   1
   0  -6  -3  364.60   20.58   1
   0   6   3  352.31   27.24   1
   1   6   3  170.68   11.25   5
  -1  -6  -3  164.09   12.63   2
  -1  -6  -3  166.35   10.74   1
   1   6   3  164.66   11.35   7
  -1  -6  -3  144.91   28.10   1
  -1  -6  -3  184.26   13.58   7
   1   6   3  183.77   12.88   1
   1   6   3  158.65   10.51   1
  -2  -6  -3    1.18    0.86   2
  -2  -6  -3   -0.36    0.83   6
  -2  -6  -3   -0.30    1.01   1
  -2  -6  -3    1.28    1.00   1
   2   6   3    2.64    0.99   1
  -2  -6  -3   -0.02    1.67   7
   2   6   3    0.71    0.87   1
  -3  -6  -3   38.23    3.96   1
  -3  -6  -3   42.34    3.99   7
   3   6   3   44.70    3.18   1
   3   6   3   43.50   14.55   1
   4   6   3  678.13   48.70   3
   4   6   3  592.66   43.88   1
   4   6   3  726.91   40.76   1
  -4  -6  -3  651.75   43.63   1
  -4  -6  -3  725.70   48.21   1
   4   6   3  678.37   41.22   2
  -5  -6  -3   84.94    7.03   1
   5   6   3   72.24    4.97   3
  -5  -6  -3   66.89    5.07   1
  -6  -6  -3   13.72    2.48   1
   6   6   3   17.73    1.41   3
  -6  -6  -3   13.31    2.35   1
  -6  -6  -3   16.13    1.15   4
   7   6   3   48.60    4.52   1
  -7  -6  -3   39.12    4.01   1
   8   6   3   16.43    2.34   1
  -9  -6  -3    2.25    1.52   1
  10   6   3   18.02    2.96   1
  11   6   3   10.21    2.44   1
  12   6   3    6.71    2.53   1
 -13  -6  -3   -4.33    3.06   1
  13   6   3    3.99    2.85   1
 -10   7   3   -0.59    1.81   1
  10  -7  -3   -0.50    2.76   1
  10  -7  -3    3.35    2.40   4
   9  -7  -3   28.95    4.52   4
  -9   7   3   30.27    3.93   1
   9  -7  -3   33.31    3.92   1
   8  -7  -3   23.66    4.31   1
   8  -7  -3   24.17    3.58   4
  -8   7   3   32.11    3.66   1
  -7   7   3    1.14    1.94   1
   7  -7  -3   -1.92    1.29   1
   7  -7  -3   -0.56    1.52   4
  -6   7   3   20.07    3.37   1
   6  -7  -3   27.86    3.29   1
  -5   7   3   19.39    3.15   1
   5  -7  -3   17.64    2.78   1
   4  -7  -3   42.99    4.74   1
  -4   7   3   40.87    4.17   1
   3  -7  -3  237.90   19.24   1
   3  -7  -3  208.50   14.94   1
  -3   7   3  237.39   14.66   1
   2  -7  -3   12.66    2.08   1
   2  -7  -3    8.47    1.51   1
   1  -7  -3    7.57    0.82   5
   1  -7  -3    8.17    1.61   1
  -1   7   3    9.48    1.99   7
   1  -7  -3    5.57    1.36   1
  -1   7   3    5.30    1.22   1
   0   7   3   59.17    6.39   1
   0  -7  -3   55.05    4.67   1
   0   7   3   56.27    4.69   1
   0   7   3   53.59    3.80   6
   0  -7  -3   62.65    4.13   1
   0   7   3   59.49    4.96   7
  -1  -7  -3  297.44   18.98   2
  -1  -7  -3  300.46   49.02   1
  -1  -7  -3  309.82   19.52   1
  -1  -7  -3  289.11   23.65   7
   1   7   3  264.03   18.59   1
   1   7   3  282.04   20.57   1
   1   7   3  298.02   19.13   7
   2   7   3    8.13    2.18   1
  -2  -7  -3    8.94    1.56   7
  -2  -7  -3   11.02    1.58   6
   2   7   3   10.36    1.02   5
  -2  -7  -3   10.75    1.32   1
  -2  -7  -3    9.63    1.91   1
  -3  -7  -3  149.02   11.29   1
  -3  -7  -3  139.79   10.85   7
  -3  -7  -3  175.64   11.59   1
   3   7   3  148.23   10.62   1
   3   7   3  109.11   55.58   1
  -4  -7  -3   46.68    3.73   1
  -4  -7  -3   57.58    5.08   7
   4   7   3   57.15    4.58   3
   4   7   3   47.75    5.30   1
   4   7   3   52.96    3.79   2
   5   7   3   86.93    6.92   1
  -5  -7  -3   81.39    6.94   1
   5   7   3   88.48    6.15   3
  -5  -7  -3   85.38    5.99   1
  -6  -7  -3    6.97    0.76   4
   6   7   3    6.65    1.12   3
  -6  -7  -3    9.04    2.07   1
   6   7   3    8.30    1.85   1
  -8  -7  -3  702.46   47.38   1
   8   7   3  702.40   45.72   1
  -9  -7  -3    6.83    2.16   1
   9   7   3    7.34    2.63   1
 -11  -7  -3    8.04    2.41   1
  11   7   3    5.33    2.93   1
  12   7   3   16.26    3.57   1
  13   7   3    9.93    4.14   1
   9  -8  -3    0.40    1.77   4
  -9   8   3   -0.93    2.36   1
   9  -8  -3   -2.51    2.55   1
   8  -8  -3    3.01    1.90   4
   8  -8  -3    1.06    1.85   1
  -7   8   3    1.74    1.52   1
   7  -8  -3    6.88    1.99   1
   7  -8  -3    4.22    1.90   4
  -6   8   3   91.03    7.98   1
   6  -8  -3   90.93    6.96   1
   5  -8  -3   -0.54    1.11   1
  -5   8   3    2.14    1.22   1
   4  -8  -3   12.13    2.17   1
  -4   8   3    8.95    2.27   1
   3  -8  -3   -0.40    0.96   1
  -3   8   3    0.78    0.99   1
   3  -8  -3   -2.07    1.17   1
  -2   8   3  157.52   15.59   1
  -2   8   3  154.07   13.87   7
   2  -8  -3  157.64   10.07   1
   2  -8  -3  160.83   10.73   5
   2  -8  -3  154.37   11.84   1
  -1   8   3  269.57   17.95   6
  -1   8   3  267.77   19.59   7
   1  -8  -3  282.77   18.04   1
  -1   8   3  255.01   23.00   1
   1  -8  -3  278.56   18.27   5
   1  -8  -3  265.29   21.36   1
   0  -8  -3   14.95    1.92   2
   0   8   3   17.89    1.93   1
   0  -8  -3   21.17    2.19   1
   0  -8  -3   17.63    2.19   1
  -1  -8  -3   11.73    3.77   1
   1   8   3    7.15    1.43   7
  -1  -8  -3    8.63    1.42   2
   1   8   3    9.04    1.86   1
  -1  -8  -3    5.53    1.67   1
   2   8   3   16.33    1.52   5
  -2  -8  -3   17.29    2.72   7
   2   8   3   13.90    1.88   1
  -2  -8  -3   13.84    1.63   1
  -2  -8  -3   16.83    2.56   1
  -3  -8  -3  128.18   10.33   1
   3   8   3  131.79    8.81   1
  -3  -8  -3  125.21    9.63   1
  -3  -8  -3  128.91   12.49   6
  -3  -8  -3  128.95   10.07   7
  -4  -8  -3    4.51    1.43   1
  -4  -8  -3    1.44    1.67   7
  -4  -8  -3    0.76    1.11   1
   4   8   3    2.00    0.95   3
   4   8   3    2.74    2.69   1
   5   8   3  214.57   14.26   2
  -5  -8  -3  247.75   17.68   1
   5   8   3  211.56   14.49   3
  -5  -8  -3  220.70   14.68   1
   5   8   3  194.83   14.99   1
  -5  -8  -3  241.43   16.87   7
   6   8   3   50.40   18.40   2
   6   8   3   70.95    5.42   3
  -6  -8  -3   70.68    7.73   1
   6   8   3   53.52    4.99   1
  -6  -8  -3   65.12    7.02   1
  -6  -8  -3   70.50    5.54   4
   7   8   3   94.30    6.65   3
  -7  -8  -3   94.00    7.85   1
   7   8   3   49.50   21.68   2
   7   8   3   77.89    7.32   1
   8   8   3   52.80    4.97   1
  -9  -8  -3    8.42    2.17   1
   9   8   3    3.85    2.46   1
  10   8   3    1.01    1.61   1
  11   8   3    5.85    2.23   1
  12   8   3   17.59    3.72   1
  -9   9   3   57.78    8.35   1
   9  -9  -3   52.74    7.06   4
   8  -9  -3    0.08    1.76   4
  -8   9   3   -0.52    1.45   1
   8  -9  -3    1.58    1.70   1
   7  -9  -3   -0.23    2.01   4
   7  -9  -3    2.80    2.44   1
  -7   9   3    0.89    1.45   1
  -6   9   3    5.19    2.30   1
   6  -9  -3    0.63    1.95   1
   6  -9  -3    0.35    1.72   4
   5  -9  -3   63.20    6.10   1
  -5   9   3   62.93    7.06   1
   4  -9  -3    2.06    1.74   1
   3  -9  -3   17.35    1.70   5
  -3   9   3   17.78    2.74   1
   3  -9  -3   13.18    2.29   1
   2  -9  -3  420.20   34.70   1
   2  -9  -3  504.70   32.71   1
  -2   9   3  504.35   34.56   1
   2  -9  -3  516.13   30.13   5
   1  -9  -3   77.84    4.94   5
  -1   9   3   72.14    6.37   6
   1  -9  -3   73.11    6.66   1
   1  -9  -3   68.00    5.73   1
  -1   9   3   81.15    9.70   1
  -1   9   3   74.09    8.32   7
   0  -9  -3    2.26    1.67   1
   0   9   3    0.32    2.18   7
   0  -9  -3    1.49    1.32   1
   0   9   3    1.98    1.42   1
  -1  -9  -3    3.29    1.79   1
  -1  -9  -3    1.63    1.59   1
  -1  -9  -3    2.37    1.96   7
   1   9   3    3.62    1.49   1
  -2  -9  -3   -1.94    1.32   1
  -2  -9  -3    0.88    1.06   2
   2   9   3    1.76    1.40   7
  -2  -9  -3    1.27    0.82   1
   2   9   3   -0.38    0.29   5
  -3  -9  -3    4.80    1.78   1
   3   9   3    6.05    2.45   1
   3   9   3    6.02    1.31   5
  -3  -9  -3    3.47    1.17   1
  -3  -9  -3    6.03    1.14   6
  -4  -9  -3   60.94    4.87   1
  -4  -9  -3   67.44    6.68   1
  -4  -9  -3   64.86    5.91   6
   4   9   3   67.37   23.69   1
  -4  -9  -3   58.98    5.38   7
   4   9   3   54.49    5.56   3
  -5  -9  -3   78.74    7.88   7
   5   9   3   85.14    6.86   3
  -5  -9  -3   93.84    9.40   1
  -5  -9  -3   82.86    7.35   1
  -5  -9  -3   98.85    8.73   4
  -6  -9  -3  135.37   12.41   1
  -6  -9  -3  145.52   10.72   7
  -6  -9  -3  152.68   12.88   4
   6   9   3  125.69   14.10   3
   6   9   3  166.77   11.19   1
   6   9   3  159.19   10.52   2
  -7  -9  -3    2.67    2.08   1
   7   9   3    0.03    1.35   1
  -7  -9  -3    3.66    2.79   7
   7   9   3    0.13    0.91   2
   7   9   3    1.60    0.84   3
   8   9   3    3.91    1.57   1
  -8  -9  -3    3.37    2.19   1
   9   9   3   19.04    3.44   1
  10   9   3   94.96    8.16   1
  11   9   3   15.10    4.92   1
  12   9   3   24.04    5.28   1
   8 -10  -3   29.68    5.20   4
   8 -10  -3   24.11    3.42   1
  -8  10   3   25.39    4.32   1
   7 -10  -3    1.18    1.88   1
   7 -10  -3    7.65    3.26   4
  -7  10   3    0.34    1.73   1
   6 -10  -3   -0.71    1.78   4
  -6  10   3    2.63    2.05   1
   6 -10  -3    2.54    2.16   1
   5 -10  -3   43.65    4.72   5
  -5  10   3   42.04    4.97   1
   5 -10  -3   45.18    5.17   1
   5 -10  -3   56.70    5.69   4
   4 -10  -3   80.38    7.59   5
   4 -10  -3   68.85    5.91   1
  -4  10   3   75.40    7.54   1
  -3  10   3  268.86   19.42   1
   3 -10  -3  286.54   18.59   5
   3 -10  -3  236.42   16.67   1
   2 -10  -3    6.06    1.59   1
   2 -10  -3    4.94    0.99   5
   2 -10  -3    3.75    1.81   1
  -2  10   3    4.24    1.69   1
   1 -10  -3    3.20    0.66   5
   1 -10  -3    0.62    1.90   1
   0 -10  -3   51.69    3.93   1
   0  10   3   50.21    4.32   1
  -1 -10  -3  171.94   13.48   1
  -1 -10  -3  187.18   13.94   7
   1  10   3  178.61   12.78   1
   2  10   3    3.10    0.47   5
  -2 -10  -3    4.07    2.08   7
  -2 -10  -3    2.08    1.87   1
   2  10   3    4.86    2.03   1
  -2 -10  -3    2.55    0.96   1
  -3 -10  -3    6.15    3.13   7
   3  10   3    4.77    2.27   1
  -3 -10  -3    5.55    1.74   1
  -3 -10  -3    3.17    1.24   1
   4  10   3    6.68    2.09   1
  -4 -10  -3    6.90    3.04   7
  -4 -10  -3    3.58    1.77   1
  -4 -10  -3    4.98    1.61   1
  -4 -10  -3    8.47    1.78   6
   4  10   3    6.12    1.09   5
  -5 -10  -3   24.07    3.02   1
  -5 -10  -3   21.05    4.10   1
  -5 -10  -3   25.02    3.04   4
   5  10   3   30.12    9.58   1
  -6 -10  -3   42.26    4.34   1
   6  10   3   30.52    3.70   2
  -6 -10  -3   38.40    3.20   4
   6  10   3   38.55    4.17   3
  -6 -10  -3   30.39    5.45   7
   7  10   3    1.15    0.63   2
   7  10   3   -1.11    1.92   1
  -7 -10  -3   -1.37    1.59   7
   7  10   3   -0.17    0.92   3
  -8 -10  -3    5.89    3.28   7
   8  10   3    6.86    2.43   1
   8  10   3    8.30    1.55   2
  -8 -10  -3   10.13    2.71   1
  -9 -10  -3   16.39    3.11   7
  -9 -10  -3    9.71    3.40   1
   9  10   3   22.38    4.08   1
  10  10   3    4.65    2.25   1
  11  10   3    5.01    2.05   1
 -12 -10  -3    3.44    2.10   1
  12  10   3    5.61    2.48   1
   7 -11  -3    3.36    2.04   1
   7 -11  -3    2.92    2.50   4
   6 -11  -3   -0.18    1.37   1
   6 -11  -3   -0.64    1.90   4
   5 -11  -3    2.44    2.08   4
   5 -11  -3    5.57    2.41   1
  -5  11   3    2.65    1.43   1
   5 -11  -3    4.62    1.37   5
   4 -11  -3    2.42    0.83   5
   4 -11  -3    6.39    3.55   4
  -4  11   3    2.97    1.42   1
   4 -11  -3    1.03    1.60   1
   3 -11  -3    0.85    0.77   5
  -3  11   3    0.34    1.07   1
   3 -11  -3   -1.37    1.33   1
   2 -11  -3    3.07    1.78   1
  -2  11   3    4.80    1.82   1
   2 -11  -3    0.55    0.55   5
   1 -11  -3    3.71    1.59   1
   1 -11  -3    1.15    1.39   1
  -1  11   3    1.53    0.76   6
   0  11   3   40.06    4.61   1
   0 -11  -3   48.54    5.10   1
  -1 -11  -3    7.75    2.26   1
   1  11   3    7.83    2.03   1
   2  11   3    0.99    1.21   1
  -2 -11  -3   -0.62    1.95   1
  -2 -11  -3   -1.45    1.49   7
  -3 -11  -3   -0.44    0.94   1
   3  11   3   -0.15    1.54   1
  -3 -11  -3    3.43    2.64   7
   4  11   3    1.42    0.64   5
  -4 -11  -3    1.07    1.85   1
  -4 -11  -3    2.17    1.09   1
  -4 -11  -3    1.68    1.17   6
   4  11   3    2.14    1.39   1
   5  11   3  113.52   11.84   1
  -5 -11  -3  133.51    8.92   1
  -5 -11  -3  102.76    9.21   4
  -5 -11  -3  125.95    9.93   7
  -5 -11  -3  128.73   12.17   1
  -6 -11  -3   14.26    2.80   7
  -6 -11  -3   12.10    1.60   4
  -6 -11  -3    9.21    3.01   1
  -7 -11  -3    7.40    1.18   4
  -7 -11  -3    9.18    2.66   1
   8  11   3    7.59    2.77   1
  -8 -11  -3   11.09    2.68   7
   8  11   3    9.98    1.68   2
  -8 -11  -3    6.22    2.67   1
  -9 -11  -3    4.17    1.86   1
  -9 -11  -3   10.58    4.22   7
 -10 -11  -3   54.51    6.80   7
  10  11   3   44.02    5.35   1
 -10 -11  -3   45.46    5.44   1
 -11 -11  -3    0.03    1.88   1
  11  11   3    2.04    1.86   1
 -11 -11  -3    5.00    3.22   7
  -5  12   3    8.78    2.53   1
   5 -12  -3   10.74    2.81   1
  -4  12   3    1.89    1.38   1
   4 -12  -3    6.41    3.13   4
   4 -12  -3    1.15    1.76   1
   3 -12  -3   17.74    4.54   4
   3 -12  -3   12.41    2.26   1
  -3  12   3    7.20    1.81   1
   2 -12  -3   30.96    3.52   1
   2 -12  -3   31.16    3.59   4
  -2  12   3   20.82    3.74   6
  -2  12   3   22.36    3.26   1
   1 -12  -3   60.35    6.17   1
   1 -12  -3   61.26    5.84   4
  -1  12   3   64.97    6.24   1
   0 -12  -3   12.09    2.63   1
   0 -12  -3   19.05    7.46   4
   1  12   3  975.87   66.83   1
  -1 -12  -3  883.64   64.67   1
  -1 -12  -3  973.36   73.44   4
  -2 -12  -3  109.84    6.89   1
  -2 -12  -3   91.69    7.81   7
   2  12   3  105.91    9.69   1
  -2 -12  -3  105.12   10.50   4
  -2 -12  -3   97.34    9.72   1
  -3 -12  -3  191.46   15.79   1
   3  12   3  196.09   17.41   5
  -3 -12  -3  189.30   19.17   1
   3  12   3  196.22   17.53   1
  -3 -12  -3  178.99   16.79   4
  -3 -12  -3  178.17   16.57   7
  -4 -12  -3  135.97   13.91   1
  -4 -12  -3  131.38    9.92   7
   4  12   3  127.59   11.71   1
  -4 -12  -3  119.13   10.43   4
  -5 -12  -3   57.96    6.14   1
   5  12   3   52.10    6.40   1
  -5 -12  -3   55.38    5.35   4
  -6 -12  -3   18.48    2.34   4
   6  12   3   15.53    2.43   1
  -6 -12  -3   11.28    2.72   1
  -7 -12  -3    3.28    1.58   1
  -7 -12  -3   -1.03    2.11   7
  -8 -12  -3   -0.56    1.47   1
   8  12   3   -4.99    2.88   1
  -9 -12  -3    9.07    3.00   7
  10  12   3    4.16    2.09   1
 -10 -12  -3    0.92    1.72   1
 -10 -12  -3    9.53    3.21   7
 -11 -12  -3    4.64    2.24   1
 -11 -12  -3    9.46    4.72   7
   5 -13  -3    2.37    2.29   4
   4 -13  -3   -0.96    1.31   1
   3 -13  -3   56.74    5.69   1
   3 -13  -3   65.95    8.54   4
  -3  13   3   64.57    6.74   1
   2 -13  -3    9.68    2.87   1
   2 -13  -3   15.26    3.29   4
   1 -13  -3    0.70    1.75   4
  -1  13   3    0.54    1.12   1
   1 -13  -3    1.24    1.34   1
   0  13   3    1.41    1.61   1
   0 -13  -3    1.43    1.90   1
   0 -13  -3    2.16    2.25   4
  -1 -13  -3   -1.18    2.32   4
  -1 -13  -3    0.10    1.26   1
   1  13   3    2.20    1.35   1
  -2 -13  -3   15.30    2.89   1
  -2 -13  -3   16.64    3.34   4
  -2 -13  -3   18.08    3.64   7
  -3 -13  -3   -2.03    1.50   4
  -3 -13  -3    2.75    2.53   7
  -3 -13  -3    1.57    1.99   1
   3  13   3    0.36    1.53   1
   4  13   3   26.40    3.55   1
  -4 -13  -3   25.45    4.39   7
  -4 -13  -3   26.06    3.24   4
  -5 -13  -3    9.95    1.84   4
   5  13   3   13.22    3.29   1
  -5 -13  -3    8.97    2.91   7
  -6 -13  -3   11.81    4.14   7
  -6 -13  -3    3.91    1.93   1
  -6 -13  -3    7.07    1.70   4
   6  13   3   10.33    2.99   1
   7  13   3   70.18    7.25   1
  -7 -13  -3   82.34    8.36   1
  -8 -13  -3   -0.70    1.42   1
  -8 -13  -3   -3.16    3.09   7
  -9 -13  -3    3.11    2.42   7
  -9 -13  -3    3.16    2.65   1
 -10 -13  -3   13.43    3.76   1
 -10 -13  -3    6.68    3.97   7
   4 -14  -3    3.91    1.67   1
   3 -14  -3   -0.17    1.35   1
   3 -14  -3    0.41    2.22   4
   2 -14  -3    4.60    3.00   4
   2 -14  -3    8.95    1.95   1
   1 -14  -3   -1.22    1.26   1
   1 -14  -3    0.59    1.96   4
   0 -14  -3   23.45    3.82   4
   0 -14  -3   24.22    3.10   1
  -1 -14  -3   33.81    3.99   1
  -1 -14  -3   42.20    4.95   4
   1  14   3   40.98    7.25   1
  -2 -14  -3    4.08    2.18   1
  -3 -14  -3  240.89   16.32   4
   3  14   3  207.48   21.18   1
  -3 -14  -3  223.18   19.71   1
  -3 -14  -3  213.78   17.12   7
   4  14   3   22.89    2.89   1
  -4 -14  -3   19.83    2.94   1
   5  14   3    4.01    3.05   1
  -5 -14  -3    0.94    1.77   1
  -6 -14  -3   63.75    7.41   7
  -6 -14  -3   65.85    5.06   4
  -7 -14  -3   29.90    4.25   1
  -7 -14  -3   24.22    5.09   7
  -8 -14  -3   85.20    9.46   1
  -8 -14  -3   87.70   12.08   7
  -9 -14  -3    9.02    3.25   7
   3 -15  -3    3.05    2.55   4
   2 -15  -3    2.45    2.10   1
   2 -15  -3    2.97    2.26   4
   1 -15  -3    8.66    2.71   4
   0 -15  -3   49.20    5.87   4
   0 -15  -3   70.07    5.60   1
  -1 -15  -3   85.35    8.90   4
  -1 -15  -3   89.90    8.22   1
  -2 -15  -3   24.19    3.61   4
  -2 -15  -3   23.97    3.32   1
  -3 -15  -3    0.66    1.16   1
  -3 -15  -3    1.05    4.09   4
  -3 -15  -3    3.41    2.11   7
  -4 -15  -3    2.40    2.59   7
  -5 -15  -3   24.81    2.77   1
  -5 -15  -3   21.97    3.68   4
  -6 -15  -3    5.24    3.25   7
  -7 -15  -3    1.27    1.55   1
  -7 -15  -3    6.63    3.88   7
  -8 -15  -3   54.03    8.64   7
  -8 -15  -3   43.70    5.69   1
   1 -16  -3   27.31    3.97   4
   1 -16  -3   27.68    4.93   1
   0 -16  -3   17.05    3.23   1
   0 -16  -3   12.76    3.43   4
  -1 -16  -3   -1.19    1.78   4
  -1 -16  -3    1.10    2.22   1
  -2 -16  -3    3.63    2.42   4
  -3 -16  -3   10.01    2.58   4
  -3 -16  -3    7.61    1.81   1
  -4 -16  -3    9.95    2.41   1
  -4 -16  -3    9.48    2.88   7
  -5 -16  -3    7.27    2.13   1
  -5 -16  -3    7.48    2.28   4
  -6 -16  -3    7.46    3.16   7
  -6 -16  -3    8.45    2.28   1
  -7 -16  -3   12.48    2.33   1
  -7 -16  -3   12.08    4.50   7
  -5 -16   4    6.38    3.22   7
  -4 -16   4    2.06    2.85   7
  -4 -16   4    0.88    1.75   4
  -3 -16   4   -2.01    2.30   4
  -2 -16   4    4.97    3.31   4
  -1 -16   4   -2.71    2.11   4
   0 -16   4    4.29    2.53   4
  -7 -15   4    2.17    1.59   1
  -7 -15   4   -4.57    4.05   7
  -6 -15   4    7.04    3.21   7
  -6 -15   4    9.72    2.19   1
  -5 -15   4    8.25    3.30   7
  -5 -15   4   10.22    1.75   1
  -5 -15   4   10.53    2.69   4
  -4 -15   4    3.11    1.07   1
  -4 -15   4    2.91    4.07   7
  -4 -15   4    1.79    2.81   4
  -3 -15   4   15.37    2.61   1
  -3 -15   4   24.50    5.29   4
  -2 -15   4    3.68    2.08   4
  -2 -15   4    0.58    0.97   1
  -1 -15   4  287.86   26.78   1
  -1 -15   4  302.45   22.48   4
   0 -15   4   -1.93    1.06   1
   0  15  -4    2.19    1.48   6
  -1  15  -4    1.50    2.08   6
   1 -15   4    3.97    1.50   1
   2 -15   4    4.26    2.51   4
  -8 -14   4   -4.41    2.60   7
   8  14  -4    1.64    1.33   2
  -8 -14   4   -1.32    1.07   1
   7  14  -4   54.03    5.60   2
  -7 -14   4   59.27    8.31   1
  -7 -14   4   50.59    9.11   7
  -6 -14   4    5.09    1.82   1
   6  14  -4    4.39    1.57   2
  -6 -14   4    0.27    4.72   7
  -5 -14   4    0.23    0.76   1
  -5 -14   4    1.01    1.92   4
  -5 -14   4    8.36    4.39   7
  -4 -14   4    6.65    3.77   7
  -4 -14   4    0.12    3.29   4
  -3 -14   4   35.03    5.02   4
  -3 -14   4   48.18    5.86   7
  -3 -14   4   36.93    4.31   1
  -1 -14   4    4.59    2.72   4
   0  14  -4   60.99    6.11   6
   0 -14   4   64.40    6.60   1
  -1  14  -4    0.98    1.47   6
   1 -14   4    2.40    1.32   1
   1 -14   4   -2.96    3.30   4
   2 -14   4   10.42    1.78   1
  -3  14  -4   -0.01    1.25   6
   3 -14   4    3.30    1.46   1
   3 -14   4    0.71    2.48   4
   4 -14   4   20.43    4.71   4
   4 -14   4   16.87    3.95   1
   9  13  -4    2.29    1.78   2
  -9 -13   4    2.13    2.89   7
  -8 -13   4    9.65    1.98   1
  -8 -13   4   10.57    3.47   7
  -7 -13   4   14.18    2.50   1
  -7 -13   4   13.35    3.96   7
  -6 -13   4    7.75    2.09   1
  -6 -13   4    4.73    2.64   7
  -6 -13   4    7.08    2.00   4
  -5 -13   4   15.59    2.01   1
   5  13  -4    8.87    1.86   2
  -5 -13   4   11.71    2.75   4
   4  13  -4   -1.26    1.23   2
  -4 -13   4   -0.03    0.90   1
  -4 -13   4    1.62    3.12   7
  -4 -13   4    0.98    2.25   4
  -3 -13   4   16.84    2.27   1
  -3 -13   4   13.40    4.09   7
  -3 -13   4   17.50    3.56   4
  -2 -13   4   10.13    2.99   7
  -2 -13   4    5.74    1.21   1
   1  13  -4    8.27    1.75   6
  -1 -13   4    5.44    1.26   1
   0 -13   4    6.19    1.57   1
   0 -13   4    5.02    2.30   4
   1 -13   4  144.83   10.31   1
   1 -13   4  113.44   10.42   4
  -1  13  -4  119.71   11.71   6
   2 -13   4   22.11    5.02   4
   2 -13   4   18.68    2.45   1
   2 -13   4   14.35    2.45   5
   3 -13   4   22.62    3.24   1
   3 -13   4   22.71    4.40   4
   3 -13   4   15.18    2.28   5
   4 -13   4   -0.12    2.31   4
   5 -13   4   14.25    3.26   4
 -10 -12   4   19.71    3.74   1
 -10 -12   4   15.62    3.98   7
  -9 -12   4    3.64    1.59   1
   9  12  -4    1.93    1.24   2
  -9 -12   4    5.36    3.09   7
  -8 -12   4   14.76    4.67   7
   8  12  -4    6.63    2.09   2
  -8 -12   4    9.40    2.04   1
  -7 -12   4   19.12    4.86   7
   7  12  -4   17.76    5.36   2
  -7 -12   4   14.81    2.47   1
  -6 -12   4   37.83    4.83   4
  -6 -12   4   51.56    6.37   7
  -6 -12   4   59.24    5.70   1
   6  12  -4   42.11   14.68   2
   5  12  -4  103.08    8.53   2
  -5 -12   4   94.36    9.83   1
  -5 -12   4   92.65    9.74   7
  -5 -12   4   92.87    8.53   4
  -4 -12   4    4.53    3.29   7
  -4 -12   4    0.55    1.82   4
   4  12  -4    1.08    1.47   2
  -3 -12   4    2.53    3.88   7
  -3 -12   4   10.84    2.81   4
  -3 -12   4    8.05    1.29   1
  -2 -12   4   31.72    4.39   7
  -2 -12   4   32.72    3.32   1
  -2 -12   4   28.87    4.35   4
   1  12  -4    9.32    2.53   6
  -1 -12   4    7.76    3.12   4
  -1 -12   4    8.16    1.22   1
   0  12  -4    6.59    2.23   6
   0 -12   4    4.22    1.33   1
  -1  12  -4   21.17    3.21   6
   1 -12   4   22.07    3.54   4
   1 -12   4   26.40    2.58   1
   1 -12   4   20.39    2.60   5
   2 -12   4    9.75    2.06   1
   3 -12   4    1.51    2.58   4
   3 -12   4    9.61    1.85   5
   3 -12   4    6.07    1.42   1
   4 -12   4    2.91    2.15   1
   5 -12   4   23.16    3.83   4
   5 -12   4   18.75    2.48   1
   5 -12   4   25.55    3.77   5
   6 -12   4   10.85    2.91   5
   6 -12   4    7.63    2.45   1
   6 -12   4    6.68    2.60   4
 -11 -11   4    6.22    2.63   1
 -11 -11   4    3.36    3.96   7
 -10 -11   4    1.13    2.56   7
 -10 -11   4    6.35    3.11   1
  -9 -11   4    0.06    1.17   1
  -9 -11   4   -1.89    2.93   7
  -8 -11   4    0.46    3.58   7
  -8 -11   4    2.55    2.34   1
  -7 -11   4   -0.49    2.31   7
  -7 -11   4    0.63    1.11   1
   7  11  -4    0.95    1.18   2
   6  11  -4    1.01    1.68   2
  -6 -11   4    0.63    0.88   1
  -6 -11   4    4.72    2.84   7
  -6 -11   4    0.55    1.29   4
   5  11  -4    3.61    2.64   2
  -5 -11   4   -0.13    0.91   1
  -5 -11   4   -0.90    1.83   4
   5  11  -4   -0.63    1.69   1
  -5 -11   4   -4.07    2.84   7
  -4 -11   4    0.18    2.14   7
   4  11  -4   -2.07    1.25   1
  -4 -11   4    0.15    1.64   4
  -4 -11   4    1.30    1.19   1
   3  11  -4    1.40    1.27   2
   3  11  -4    0.44    0.87   1
  -3 -11   4    1.87    0.66   1
  -3 -11   4    4.46    2.23   7
  -2 -11   4    7.00    1.93   4
  -2 -11   4    5.31    1.10   1
   2  11  -4    6.44    1.18   1
  -2 -11   4    6.08    2.82   7
  -2 -11   4    5.11    1.12   1
  -1 -11   4   74.58    8.22   4
  -1 -11   4   89.06    6.59   1
   1  11  -4   80.97    6.68   6
   1  11  -4   87.92    8.99   1
  -1 -11   4   89.32    7.34   1
   0 -11   4    1.64    0.77   1
   0  11  -4    1.77    0.99   1
   0 -11   4    1.46    2.55   4
   1 -11   4    0.61    1.29   1
  -1  11  -4   -2.35    1.37   6
  -1  11  -4    0.75    0.67   1
   1 -11   4   -1.42    1.85   4
   1 -11   4    0.55    0.78   5
   2 -11   4   44.67    3.96   5
  -2  11  -4   50.81    6.13   1
   2 -11   4   51.89    4.37   1
   2 -11   4   45.00    5.62   4
   3 -11   4    0.10    1.20   1
   3 -11   4   -1.60    2.60   4
   3 -11   4   -0.49    1.69   5
   4 -11   4   -1.12    1.42   1
   4 -11   4    1.61    1.63   5
   4 -11   4   -2.75    2.11   4
   5 -11   4   29.26    4.09   4
   5 -11   4   35.51    3.86   1
   5 -11   4   23.76    3.43   5
   6 -11   4   22.18    3.05   5
   6 -11   4   19.96    3.42   1
   6 -11   4   16.98    3.61   4
   7 -11   4   -0.11    1.44   5
   7 -11   4    2.65    3.29   4
 -11 -10   4    3.62    2.83   7
 -11 -10   4    7.30    3.02   1
 -10 -10   4    3.14    3.43   7
 -10 -10   4   -1.03    1.73   1
   9  10  -4    3.82    3.81   1
  -9 -10   4    3.28    1.61   1
  -8 -10   4  167.82   17.50   7
  -8 -10   4  155.70   11.22   1
   8  10  -4  165.19   18.49   1
   7  10  -4   45.40    5.40   1
  -7 -10   4   51.07    5.39   7
  -7 -10   4   46.22    4.46   1
  -6 -10   4   44.61    6.77   7
  -6 -10   4   42.51    3.91   1
   6  10  -4   36.68    4.23   1
  -5 -10   4   -2.77    2.87   7
   5  10  -4   -0.51    1.47   1
  -5 -10   4    2.39    0.83   1
   5  10  -4    1.79    1.31   2
  -4 -10   4  146.57   12.98   4
  -4 -10   4  164.69   11.41   1
  -4 -10   4  149.45   13.77   1
   4  10  -4  166.02   15.79   1
  -4 -10   4  184.80   17.44   7
   4  10  -4  182.11   36.31   2
  -3 -10   4   30.12    3.28   1
  -3 -10   4   31.83    3.92   7
   3  10  -4   33.20    3.21   1
   3  10  -4   39.68    3.66   2
   2  10  -4   16.51    2.69   5
  -2 -10   4   14.59    1.70   1
   2  10  -4   19.51    2.09   1
  -2 -10   4   14.17    2.51   4
   2  10  -4   21.05    2.12   2
   1  10  -4   10.77    1.22   1
  -1 -10   4   11.61    1.41   1
   1  10  -4    9.03    2.20   6
  -1 -10   4    8.90    1.31   1
  -1 -10   4    9.19    2.03   4
   0 -10   4   89.51    7.41   4
   0 -10   4   78.46    5.89   1
   0  10  -4   80.33    6.30   1
   0  10  -4   81.16    6.62   6
   0  10  -4   68.88    5.63   5
   1 -10   4   57.31    5.30   1
   1 -10   4   60.53    4.13   1
  -1  10  -4   52.22    4.38   1
   1 -10   4   49.37    6.21   4
   1 -10   4   47.48    3.92   5
   2 -10   4    2.50    1.27   1
  -2  10  -4    2.31    1.07   1
   3 -10   4   65.50    7.06   4
   3 -10   4   59.52    4.73   1
  -3  10  -4   63.49    6.09   1
   3 -10   4   53.64    4.51   5
  -4  10  -4   35.59    3.41   1
   4 -10   4   31.02    3.39   1
   4 -10   4   38.37    6.12   4
   4 -10   4   31.99    3.56   5
   5 -10   4   13.63    3.68   4
   5 -10   4   11.60    2.31   5
   5 -10   4   10.94    2.30   1
   6 -10   4   -0.55    2.83   4
   6 -10   4    1.89    1.87   1
   6 -10   4    2.76    1.80   5
   7 -10   4    4.74    2.71   4
   7 -10   4    4.36    2.29   1
   8 -10   4   13.84    3.30   1
   8 -10   4    9.41    2.08   5
   8 -10   4   14.41    3.13   4
 -11  -9   4    1.74    1.62   1
 -11  -9   4   -0.95    2.19   7
 -10  -9   4   45.40    6.14   7
 -10  -9   4   58.74    5.88   1
 -10  -9   4   49.49    5.54   3
  -9  -9   4    1.43    1.70   1
  -9  -9   4    7.15    3.49   7
   9   9  -4    3.34    2.19   1
   8   9  -4    2.44    1.87   1
  -8  -9   4    4.12    3.59   7
  -8  -9   4    1.28    1.26   3
  -8  -9   4    2.11    1.94   1
  -7  -9   4    5.34    1.56   1
   7   9  -4    4.17    1.69   1
  -6  -9   4  158.25   11.62   1
  -6  -9   4  155.62   14.04   7
  -6  -9   4  124.06   11.75   1
   6   9  -4  144.71   12.20   1
  -5  -9   4    4.21    1.18   1
  -5  -9   4    6.96    1.61   4
   4   9  -4    1.48    1.49   1
  -4  -9   4    4.38    3.13   7
  -4  -9   4    3.04    1.69   4
  -4  -9   4    0.06    0.58   1
   3   9  -4   45.03    4.38   5
  -3  -9   4   50.68    3.94   1
  -3  -9   4   49.70    6.78   7
  -3  -9   4   50.60    4.28   1
   3   9  -4   48.39    3.80   1
   3   9  -4   58.52   14.08   2
  -3  -9   4   46.94    5.52   4
   2   9  -4   55.49    5.26   1
  -2  -9   4   54.95    3.71   1
  -2  -9   4   59.29    5.16   4
   2   9  -4   56.38    4.61   5
  -2  -9   4   60.81    4.81   1
   2   9  -4   65.64    5.97   6
   2   9  -4   57.62    4.80   1
  -2  -9   4   55.54    6.23   7
   2   9  -4   52.32    5.27   2
   1   9  -4   21.53    2.70   6
  -1  -9   4   27.31    2.37   1
   1   9  -4   24.42    2.43   1
   1   9  -4   19.05    2.30   5
  -1  -9   4   27.83    3.27   7
   1   9  -4   23.84    2.30   1
   1   9  -4   18.08    2.27   2
  -1  -9   4   23.84    2.02   1
   0  -9   4   79.47    6.32   5
   0   9  -4   74.65    5.85   1
   0  -9   4   78.18    5.95   4
   0  -9   4   84.05    5.71   1
   0   9  -4   68.31    6.48   5
   0   9  -4   71.02    6.27   6
   0   9  -4   74.51    6.34   1
   1  -9   4   15.06    1.82   5
   1  -9   4   13.42    2.12   1
   1  -9   4   15.07    3.49   4
  -1   9  -4   10.96    1.20   1
   2  -9   4  188.67   14.15   5
   2  -9   4  202.66   12.96   1
  -2   9  -4  174.65   14.38   1
   2  -9   4  196.61   13.38   1
   2  -9   4  177.70   14.27   4
  -3   9  -4   43.86    4.30   1
   3  -9   4   40.34    3.10   5
   3  -9   4   45.08    4.27   1
   3  -9   4   36.99    5.26   4
   3  -9   4   37.78    3.17   1
  -4   9  -4    6.26    1.47   1
   4  -9   4    5.81    1.64   1
   4  -9   4    8.35    2.61   4
  -5   9  -4    1.72    0.97   1
   5  -9   4    1.96    1.20   5
   5  -9   4    2.35    2.89   4
   6  -9   4   12.96    3.15   4
  -6   9  -4   12.91    1.98   1
   6  -9   4   11.68    2.48   5
   7  -9   4   44.35    4.75   1
   7  -9   4   41.04    5.18   4
  -7   9  -4   42.28    5.19   1
   7  -9   4   40.23    7.22   5
   8  -9   4    9.58    3.55   4
   8  -9   4    3.20    2.02   1
   8  -9   4    4.34    1.57   5
   9  -9   4    5.07    2.52   1
   9  -9   4   -1.74    2.00   4
 -12  -8   4   21.81    4.23   1
  11   8  -4    9.12    2.59   1
 -11  -8   4   15.29    3.09   1
 -11  -8   4   12.50    1.92   3
 -11  -8   4   14.82    4.37   7
 -10  -8   4   73.61    5.81   3
  10   8  -4   51.05    7.26   1
 -10  -8   4   66.06    7.15   7
  -9  -8   4   12.47    2.21   3
  -9  -8   4   12.81    4.33   7
   9   8  -4   10.26    2.73   1
  -9  -8   4   14.04    2.92   1
  -8  -8   4    9.39    3.75   7
   8   8  -4   11.51    2.48   1
  -8  -8   4    8.09    1.59   3
   7   8  -4    3.96    1.41   1
  -7  -8   4    0.93    1.26   1
  -7  -8   4    0.28    1.54   1
   6   8  -4  137.52   10.46   1
  -6  -8   4  135.95    9.50   1
  -6  -8   4  127.79   10.57   7
  -6  -8   4  137.81    9.74   3
  -5  -8   4   54.17    4.67   1
   5   8  -4   41.19    4.18   1
   4   8  -4  116.46   10.52   1
  -4  -8   4  113.53    8.34   4
  -4  -8   4  101.68    8.83   7
  -4  -8   4  111.29    8.58   1
  -4  -8   4  103.86    6.89   1
  -3  -8   4  131.27    8.68   1
   3   8  -4  132.63   70.44   1
   3   8  -4  134.26   10.83   5
  -3  -8   4  136.41   11.52   7
  -3  -8   4  147.13   10.61   1
   3   8  -4  148.44   30.04   2
   3   8  -4  143.10   14.35   1
  -3  -8   4  152.37   11.11   4
   2   8  -4  367.94   80.06   2
  -2  -8   4  342.28   23.18   1
   2   8  -4  315.46   28.31   1
  -2  -8   4  340.91   36.09   4
  -2  -8   4  372.20   24.65   7
   2   8  -4  334.90   26.22   5
   2   8  -4  330.13   25.20   1
   2   8  -4  333.74   27.15   6
  -2  -8   4  347.37   20.67   1
  -1  -8   4    4.36    0.81   1
   1   8  -4    2.92    0.75   1
  -1  -8   4    2.06    1.88   7
   1   8  -4    1.72    1.52   2
   1   8  -4    4.81    1.25   6
   1   8  -4    3.10    0.82   1
   0  -8   4   15.46    3.46   1
   0   8  -4   10.85    1.70   5
   0  -8   4   13.22    1.38   1
   0   8  -4   14.52    1.36   1
   0  -8   4   14.44    2.20   5
   1  -8   4   36.13    3.33   5
  -1   8  -4   33.68    2.89   1
   1  -8   4   35.38    3.74   4
   1  -8   4   40.99    3.10   1
   1  -8   4   40.57    2.62   1
   2  -8   4    4.59    1.99   4
   2  -8   4    1.12    1.04   1
   3  -8   4   -0.88    1.09   5
   3  -8   4    0.51    1.72   4
   3  -8   4    0.35    0.73   1
   4  -8   4    2.91    0.99   1
   4  -8   4    1.13    0.93   1
   4  -8   4    5.52    1.81   5
   5  -8   4   69.37    7.00   5
   5  -8   4   77.84   14.54   1
   5  -8   4   77.33    5.97   1
   5  -8   4   66.86    6.52   4
  -5   8  -4   75.47    7.29   1
   6  -8   4   18.21    2.32   5
   6  -8   4   20.92    3.41   1
  -6   8  -4   16.26    2.36   1
   6  -8   4   20.67    2.87   4
   7  -8   4   10.26    2.06   1
   7  -8   4    9.59    3.91   4
  -7   8  -4    7.67    1.77   1
   7  -8   4   12.04    2.35   5
   8  -8   4   -0.91    1.24   5
  -8   8  -4    3.14    2.24   1
   8  -8   4   -4.69    2.58   4
   9  -8   4    1.73    2.09   4
   9  -8   4   -0.17    1.36   5
  12   7  -4   11.52    4.39   1
 -12  -7   4    9.01    2.56   1
  11   7  -4   14.71    3.36   1
 -11  -7   4   10.35    2.90   1
 -11  -7   4   13.69    2.63   3
 -10  -7   4   19.07    3.20   3
  10   7  -4   22.35    2.94   1
  -9  -7   4   76.53    6.73   3
   9   7  -4   84.55    8.91   1
  -9  -7   4   61.77    6.84   1
   8   7  -4  261.66   20.00   1
  -8  -7   4  271.32   19.08   3
  -7  -7   4    7.71    1.90   1
   7   7  -4    4.14    3.30   1
  -7  -7   4    8.58    1.53   1
  -7  -7   4    7.48    2.57   7
  -7  -7   4   10.13    2.39   3
  -6  -7   4    1.11    3.34   7
   6   7  -4    2.31    1.42   1
  -6  -7   4    1.40    1.14   3
   5   7  -4   14.75    1.95   1
  -5  -7   4   13.34    1.85   1
  -5  -7   4   17.07    3.75   7
  -4  -7   4   -2.10    1.52   3
   4   7  -4    0.44    0.71   1
  -4  -7   4   -0.10    1.15   4
   4   7  -4   -0.27    0.78   3
  -4  -7   4    4.04    2.54   7
  -4  -7   4    0.32    0.72   1
   3   7  -4  222.12   18.69   3
  -3  -7   4  234.64   15.20   1
   3   7  -4  236.62   19.12   1
  -3  -7   4  214.33   22.32   6
   3   7  -4  224.02   18.37   5
   3   7  -4  233.65   18.37   1
  -3  -7   4  248.21   23.16   7
  -3  -7   4  216.80   20.57   4
  -3  -7   4  228.08   15.91   1
  -2  -7   4  343.51   23.01   1
   2   7  -4  330.40   24.89   1
   2   7  -4  318.62   26.53   6
   2   7  -4  303.23   24.05   3
   2   7  -4  338.50   25.07   1
   2   7  -4  326.16   60.94   2
  -2  -7   4  308.74   24.16   7
   2   7  -4  320.65   23.40   5
  -2  -7   4  395.23   56.85   4
   1   7  -4    2.92    1.06   6
   1   7  -4    3.81    0.61   1
   1   7  -4    5.44    1.19   3
   1   7  -4    4.53    0.95   5
  -1  -7   4    2.94    1.45   4
  -1  -7   4    4.92    2.65   7
   0   7  -4  275.29   23.41   7
   0   7  -4  247.61   19.24   5
   0   7  -4  288.66   18.56   1
   0  -7   4  279.18   18.30   1
   0  -7   4  285.84   19.30   5
   0   7  -4  254.48   17.23   1
   0   7  -4  290.07   26.22   2
   0  -7   4  303.19   26.42   4
   1  -7   4   22.35    2.17   1
   1  -7   4   22.27    1.86   1
   1  -7   4   14.73    2.88   4
  -1   7  -4   17.79    1.54   1
  -1   7  -4   18.05    1.80   1
   1  -7   4   16.87    1.75   5
   2  -7   4  113.26    9.52   1
   2  -7   4  113.67    8.62   5
  -2   7  -4  124.46    9.43   1
   2  -7   4  132.24   12.77   4
   2  -7   4  125.91    9.96   1
  -2   7  -4  115.38    9.12   1
   3  -7   4    1.66    0.82   1
   3  -7   4    1.72    1.02   1
   3  -7   4    0.66    1.05   5
   4  -7   4    2.54    1.85   5
   4  -7   4    7.27    1.91   1
   4  -7   4    6.10    1.34   1
  -4   7  -4    4.74    1.57   1
  -5   7  -4    1.25    0.97   1
   5  -7   4    0.80    0.88   1
   5  -7   4    2.71    1.08   1
   5  -7   4    2.69    2.32   5
   5  -7   4   -1.43    1.76   4
   6  -7   4   53.21    4.70   1
  -6   7  -4   44.14    4.23   1
   6  -7   4   47.07    4.60   4
   6  -7   4   37.59   10.95   1
  -7   7  -4  118.97   12.72   1
   7  -7   4  144.51   11.46   1
   7  -7   4  137.39    9.67   4
   8  -7   4   54.09    7.18   1
   8  -7   4   64.06    7.25   4
  -8   7  -4   68.90    7.09   1
   9  -7   4    1.75    1.77   1
   9  -7   4    0.33    2.79   4
  -9   7  -4    1.13    1.56   1
  10  -7   4   25.00    4.73   1
  10  -7   4   25.02    4.62   4
  12   6  -4   -2.37    2.38   1
 -12  -6   4   -1.32    1.65   1
  11   6  -4   18.16    3.57   1
 -11  -6   4   21.82    3.31   3
 -10  -6   4    5.92    2.12   3
 -10  -6   4    2.03    1.86   1
  10   6  -4    5.29    1.85   1
  -9  -6   4   23.79    3.32   3
  -9  -6   4   25.64    3.86   1
   9   6  -4   26.90    3.37   1
  -8  -6   4  349.36   22.27   3
   8   6  -4  349.90   25.26   1
  -7  -6   4   62.82    5.27   1
   7   6  -4   70.10    6.40   1
  -7  -6   4   66.01    4.89   3
  -6  -6   4   10.95    1.49   1
  -6  -6   4    8.35    3.08   7
  -6  -6   4    9.57    1.75   3
  -6  -6   4    8.17    1.63   1
   6   6  -4   12.26    2.62   1
  -5  -6   4    1.19    0.87   1
  -5  -6   4   -0.81    1.38   7
   5   6  -4   -0.15    0.52   4
   5   6  -4   -0.26    0.69   3
  -5  -6   4   -0.90    0.75   3
   5   6  -4   -1.27    0.69   1
  -4  -6   4    5.46    1.33   3
  -4  -6   4    7.34    1.30   1
   4   6  -4    5.98    1.09   1
  -4  -6   4    8.52    3.06   7
   4   6  -4    6.78    1.44   1
   4   6  -4    6.76    1.18   4
   4   6  -4    5.70    1.21   3
   3   6  -4   46.87    4.43   4
  -3  -6   4   38.10    3.53   3
   3   6  -4   41.72    3.46   1
  -3  -6   4   54.65    3.92   4
  -3  -6   4   45.85    3.83   6
  -3  -6   4   45.00    3.34   1
  -3  -6   4   43.63    4.44   7
   3   6  -4   48.81    3.39   1
  -3  -6   4   49.92    3.83   1
   3   6  -4   43.45    3.90   3
   2   6  -4  270.84   25.16   4
   2   6  -4  301.98   41.78   1
  -2  -6   4  239.63   19.66   4
  -2  -6   4  262.40   16.85   1
   2   6  -4  260.01   22.07   7
   2   6  -4  277.68   20.96   6
   2   6  -4  269.61   20.58   3
   2   6  -4  269.89   18.50   5
  -2  -6   4  267.67   19.33   7
   1   6  -4  134.31    8.68   1
   1   6  -4  127.59   11.31   4
   1   6  -4  131.16    8.08   1
  -1  -6   4  147.57   17.64   4
   1   6  -4  141.86   11.37   7
  -1  -6   4  123.92    8.09   1
  -1  -6   4  117.85   10.12   7
   1   6  -4  131.60   26.78   2
   1   6  -4  131.46   15.70   3
   1   6  -4  130.38    9.29   6
   1   6  -4  118.33    8.63   5
   0  -6   4  290.83   18.54   1
   0  -6   4  353.10   52.01   4
   0   6  -4  276.74   29.09   4
   0   6  -4  286.45   17.74   1
   0  -6   4  263.74   17.29   5
   0   6  -4  293.45   30.55   2
   0  -6   4  283.16   21.66   7
   0   6  -4  263.57   18.48   5
   0   6  -4  274.97   18.28   1
   0   6  -4  277.76   20.84   3
   0   6  -4  258.20   23.87   7
   1  -6   4  108.53    7.42   1
  -1   6  -4  102.73   10.53   7
   1  -6   4   98.06    7.18   5
   1  -6   4  129.00   19.22   4
  -1   6  -4  109.06    7.72   1
  -1   6  -4  111.79    7.22   1
   1  -6   4  109.62    8.07   1
   2  -6   4   26.62    2.69   4
  -2   6  -4   22.47    2.64   1
   2  -6   4   24.86    2.34   5
   2  -6   4   22.04    2.02   1
   2  -6   4   23.24    1.90   1
  -2   6  -4   25.08    2.45   1
   3  -6   4   10.96    1.79   1
   3  -6   4   10.83    1.25   1
  -3   6  -4   12.03    1.65   1
  -3   6  -4   11.82    1.25   1
   4  -6   4   71.19    5.53   1
  -4   6  -4   70.51    4.93   1
   4  -6   4   85.85    7.21   1
   4  -6   4   68.29    5.90   4
   4  -6   4   83.07    6.54   5
   5  -6   4    3.29    2.03   4
   5  -6   4    2.30    1.23   1
  -5   6  -4    2.77    1.30   1
   6  -6   4    1.90    2.15   4
   6  -6   4   -0.62    1.39   1
   7  -6   4   15.26    3.15   4
  -7   6  -4   12.03    2.33   1
   8  -6   4   16.28    3.41   4
   8  -6   4   14.90    3.79   1
   9  -6   4    1.85    1.76   4
  -9   6  -4    0.79    1.63   1
   9  -6   4    0.57    1.99   1
  10  -6   4    0.93    2.24   1
 -10   6  -4    0.95    1.57   1
 -12  -5   4    4.18    3.03   1
  12   5  -4   -0.59    1.73   1
  11   5  -4   92.92    9.46   1
 -11  -5   4  101.66    8.51   3
 -11  -5   4   97.81    9.68   1
 -10  -5   4   77.22    7.85   3
 -10  -5   4   85.99    7.53   1
  10   5  -4   79.92    7.00   1
  -9  -5   4    2.54    1.42   3
   8   5  -4   50.81    7.79   1
  -8  -5   4   62.73    4.91   3
  -7  -5   4   28.63    2.83   1
  -7  -5   4   25.82    2.66   3
   7   5  -4   28.08    3.43   1
   7   5  -4   26.22    1.96   4
   6   5  -4  134.45    9.59   1
  -6  -5   4  132.78    9.20   1
  -6  -5   4  145.17   10.17   1
  -6  -5   4  127.48    9.05   3
   6   5  -4  114.52    9.35   4
  -5  -5   4   61.74    4.56   3
   5   5  -4   64.54    5.10   4
   5   5  -4   57.11    4.39   1
  -5  -5   4   63.01    5.14   1
  -5  -5   4   58.48    4.79   1
  -4  -5   4    1.15    1.22   6
  -4  -5   4   -1.00    0.75   1
  -4  -5   4    0.01    2.11   7
   4   5  -4    0.26    0.91   1
  -4  -5   4    0.29    0.92   3
   4   5  -4    0.80    0.81   1
  -4  -5   4   -0.41    0.96   1
   4   5  -4    0.32    0.65   3
   4   5  -4    0.35    0.81   4
  -3  -5   4   41.48    3.60   1
   3   5  -4   48.34    5.39   4
  -3  -5   4   46.27    8.18   7
  -3  -5   4   47.30    4.07   4
  -3  -5   4   45.46    3.95   6
   3   5  -4   41.00    3.36   1
  -3  -5   4   49.09    3.78   3
  -3  -5   4   44.74    3.60   1
   3   5  -4   53.94    4.16   3
   3   5  -4   50.12    3.64   1
   2   5  -4   30.01    2.89   1
   2   5  -4   32.60    2.25   1
  -2  -5   4   32.85    2.78   1
   2   5  -4   31.83    3.98   4
   2   5  -4   34.05    2.79   5
  -2  -5   4   39.25    3.27   3
  -2  -5   4   36.36    4.34   4
   2   5  -4   40.94    3.26   3
   2   5  -4   29.69    3.20   6
   2   5  -4   36.13    3.54   7
   1   5  -4    1.09    1.69   7
   1   5  -4   -0.51    0.34   1
   1   5  -4   -0.72    0.85   4
   1   5  -4   -1.00    0.70   3
   1   5  -4   -0.06    0.30   1
  -1  -5   4   -0.01    0.85   4
  -1  -5   4   -0.17    0.31   1
   1   5  -4    0.66    1.15   5
   1   5  -4    2.28    1.52   2
   1   5  -4    0.11    0.88   6
  -1  -5   4   -0.77    2.55   7
   0   5  -4  141.78    8.52   1
   0   5  -4  121.18   10.15   7
   0   5  -4  145.96   18.42   3
   0  -5   4  172.14   26.72   4
   0   5  -4  151.04   17.97   4
   0   5  -4  132.16    8.67   1
   0  -5   4  133.13    9.96   7
   0   5  -4  145.46   25.39   2
   0  -5   4  131.58    8.78   5
   0   5  -4  134.72    9.15   5
   0  -5   4  134.80    8.78   1
   1  -5   4  289.35   20.18   1
  -1   5  -4  335.59   44.15   5
  -1   5  -4  321.33   22.05   1
   1  -5   4  278.72   19.05   5
  -1   5  -4  306.75   21.06   1
  -1   5  -4  320.61   51.96   4
  -1   5  -4  283.65   21.68   7
   1  -5   4  357.96   63.90   4
   2  -5   4   67.30    4.78   1
  -2   5  -4   68.67    4.60   1
  -2   5  -4   64.62    4.76   1
   2  -5   4   71.62    4.02   1
  -2   5  -4   59.67    5.18   7
   2  -5   4   66.00    8.70   4
   2  -5   4   66.68    5.15   5
   3  -5   4  320.09   54.40   5
   3  -5   4  297.24   23.89   4
   3  -5   4  304.32   21.00   1
   3  -5   4  279.69   23.88   2
  -3   5  -4  297.31   20.93   1
  -3   5  -4  282.70   19.62   1
   3  -5   4  312.33   20.23   1
   4  -5   4  317.90   20.01   1
  -4   5  -4  291.97   18.66   1
   4  -5   4  260.45   22.59   1
   4  -5   4  276.47   20.72   4
   5  -5   4   80.75    8.19   4
   5  -5   4   88.31    6.46   1
   5  -5   4   89.65    7.53   1
  -5   5  -4  105.77    6.08   1
   6  -5   4   21.90    3.62   1
   6  -5   4   26.72    3.12   4
   6  -5   4   26.08    2.53   1
   7  -5   4   33.16    3.82   4
   7  -5   4   30.60    3.18   1
  -7   5  -4   33.31    3.85   1
  -8   5  -4    4.05    1.51   1
   8  -5   4    6.00    2.06   1
  -9   5  -4   10.21    2.68   1
  10  -5   4    3.86    2.22   1
  10  -5   4    1.24    2.50   4
  11  -5   4    7.98    3.56   1
 -11   5  -4    6.67    2.43   1
 -12  -4   4   -0.40    1.72   1
  12   4  -4    2.43    2.11   1
 -11  -4   4   16.10    2.84   3
 -10  -4   4    0.73    1.16   3
  10   4  -4   -0.29    1.59   1
   9   4  -4  128.54   10.84   1
  -9  -4   4  120.37   10.86   1
  -9  -4   4  129.39    8.90   3
   8   4  -4   38.94    2.67   4
   8   4  -4   40.70    5.71   1
  -8  -4   4   38.81    3.66   3
   8   4  -4   38.25    2.55   4
   7   4  -4   36.28    3.27   4
   7   4  -4   41.27    3.67   1
  -7  -4   4   40.25    4.08   1
  -7  -4   4   42.63    4.35   1
  -7  -4   4   40.97    3.91   3
  -6  -4   4   64.14    4.74   3
   6   4  -4   71.43    6.36   1
   6   4  -4   69.80    5.71   4
  -6  -4   4   59.89    4.75   1
  -5  -4   4   13.22    1.55   1
   5   4  -4   13.10    1.37   1
  -5  -4   4   13.72    1.91   3
   5   4  -4   10.36    1.23   4
  -4  -4   4  318.09   18.56   1
  -4  -4   4  286.18   20.42   3
   4   4  -4  243.93   21.36   1
   4   4  -4  254.57   20.64   1
   4   4  -4  323.47   21.98   3
   4   4  -4  294.55   24.67   4
  -4  -4   4  293.36   24.14   6
  -3  -4   4  728.18  148.57   6
  -3  -4   4  732.78  104.32   7
   3   4  -4  581.42   44.47   1
   3   4  -4  581.79   50.97   4
   3   4  -4  642.38   44.55   3
  -3  -4   4  632.43   38.06   1
  -3  -4   4  569.60   41.58   1
  -3  -4   4  608.51   44.10   3
   3   4  -4  624.39   38.29   1
   2   4  -4   44.87    4.32   3
   2   4  -4   54.35    7.54   4
   2   4  -4   44.85    3.22   1
  -2  -4   4   44.22    3.12   3
   2   4  -4   40.21    3.09   1
   2   4  -4   41.01    4.40   7
  -2  -4   4   42.49    4.34   7
  -2  -4   4   35.86    3.27   4
  -2  -4   4   43.81    5.90   6
  -2  -4   4   39.52    2.89   1
   1   4  -4 1517.91  102.69   5
  -1  -4   4 1796.27  105.67   3
   1   4  -4 1655.01  108.02   3
   1   4  -4 1475.99  109.57   6
  -1  -4   4 1572.42  101.51   1
   1   4  -4 1479.35  356.68   1
   1   4  -4 1543.66  104.31   1
   1   4  -4 1548.40  104.31   7
  -1  -4   4 1860.88  121.56   7
   0   4  -4  380.23   26.21   5
   0  -4   4  372.14   24.67   7
   0   4  -4  469.67   74.84   2
   0  -4   4  388.95   24.52   5
   0   4  -4  494.60   55.04   4
   0  -4   4  419.88   24.76   1
   0   4  -4  424.85   50.73   3
   0   4  -4  364.46   26.13   7
   0   4  -4  425.45   26.54   1
   0   4  -4  385.28   24.08   1
  -1   4  -4  101.39    6.45   1
   1  -4   4  121.30   17.85   4
  -1   4  -4  101.27    8.75   5
  -1   4  -4  117.81   17.87   4
   1  -4   4   88.52    7.59   5
  -1   4  -4  107.93    8.25   7
   1  -4   4  105.74    6.62   1
  -1   4  -4   98.90    6.45   1
  -1   4  -4  116.99    9.47   2
   2  -4   4   75.20    5.53   1
   2  -4   4   99.01    6.35   1
  -2   4  -4   90.09   10.77   4
   2  -4   4  103.91   16.91   4
  -2   4  -4   79.42    5.27   1
   2  -4   4   86.22    5.99   5
  -2   4  -4   96.69    5.79   1
   3  -4   4  219.55   15.61   4
  -3   4  -4  222.46   14.10   1
   3  -4   4  245.59   23.92   5
   3  -4   4  200.17   15.04   1
  -3   4  -4  213.26   15.94   1
   3  -4   4  237.91   13.72   1
   3  -4   4  229.97   15.99   2
  -4   4  -4  288.59   19.43   1
   4  -4   4  244.86   19.39   1
  -4   4  -4  242.79   21.17   1
   4  -4   4  255.23   17.34   1
   4  -4   4  245.64   17.58   4
   5  -4   4    4.22    1.71   4
   5  -4   4    1.72    0.83   1
   5  -4   4    3.28    2.19   1
  -5   4  -4   -0.94    1.50   1
  -6   4  -4   41.82    5.42   1
   6  -4   4   45.81    5.09   4
   6  -4   4   53.40    4.71   1
   6  -4   4   46.88    6.31   1
   7  -4   4    2.28    1.69   1
  -8   4  -4    0.14    1.13   1
   8  -4   4    0.44    1.68   1
   8  -4   4   -2.96    1.76   4
   9  -4   4    1.80    1.71   4
  -9   4  -4   -0.11    1.61   1
   9  -4   4    0.69    1.49   1
 -10   4  -4    7.53    2.25   1
  10  -4   4    3.57    1.88   4
  10  -4   4    3.45    2.55   1
  11  -4   4   10.00    2.24   4
 -11   4  -4    6.58    2.67   1
 -12  -3   4    5.32    2.07   1
  12   3  -4    0.17    1.77   1
 -11  -3   4   -0.39    1.07   3
 -10  -3   4    7.47    1.81   3
  -9  -3   4   38.65    4.04   3
  -9  -3   4   34.48    4.61   1
   9   3  -4   32.79    3.33   4
   9   3  -4   38.43    3.88   1
   8   3  -4   45.26    3.81   1
  -8  -3   4   47.19    4.13   3
  -8  -3   4   41.56    4.30   1
  -7  -3   4   18.22    2.08   1
  -7  -3   4   16.96    2.49   1
  -7  -3   4   17.06    1.83   3
   6   3  -4   76.40    6.14   1
  -6  -3   4   71.37    5.55   1
  -6  -3   4   77.43    5.60   1
  -6  -3   4   70.02    5.30   3
  -5  -3   4    3.74    1.57   3
   5   3  -4    3.08    1.76   1
   5   3  -4    3.26    1.15   1
  -5  -3   4    6.24    3.53   1
   4   3  -4    3.46    1.06   1
  -4  -3   4    5.34    0.94   1
  -4  -3   4    3.74    1.35   1
  -4  -3   4    4.27    1.00   3
   4   3  -4    4.53    1.00   4
   4   3  -4    4.59    1.42   1
  -3  -3   4    3.78    0.84   1
  -3  -3   4    2.14    0.98   6
   3   3  -4    3.92    0.88   1
  -3  -3   4    2.46    0.89   1
   3   3  -4    2.62    0.80   4
   3   3  -4    2.68    1.30   3
  -2  -3   4  411.19   27.98   3
  -2  -3   4  404.96   26.25   1
   2   3  -4  437.84   26.64   1
  -2  -3   4  515.65   82.24   6
   2   3  -4  442.40   28.77   1
   2   3  -4  419.26   30.97   4
   2   3  -4  443.34   29.84   3
  -2  -3   4  401.58   29.01   1
   1   3  -4  144.36   11.05   3
   1   3  -4  115.98    7.66   1
   1   3  -4  144.17   10.85   7
  -1  -3   4  120.90    9.01   4
   1   3  -4  104.08    8.18   6
   1   3  -4  110.28    7.22   4
  -1  -3   4  114.16    7.59   1
  -1  -3   4  110.21    8.03   3
  -1  -3   4  141.26   10.45   7
   1   3  -4  128.24   11.59   1
   0   3  -4  149.62   11.97   7
   0  -3   4  193.13   11.90   3
   0  -3   4  148.72   12.07   5
   0  -3   4  164.18    9.97   1
   0   3  -4  202.64   12.57   5
   0  -3   4  208.63   13.11   7
   0   3  -4  150.77   10.07   1
   0   3  -4  205.12   17.29   4
   0   3  -4  195.77   19.54   3
  -1   3  -4   25.52    1.95   4
  -1   3  -4   22.31    1.77   1
   1  -3   4   23.02    1.65   1
  -1   3  -4   22.53    1.75   5
  -1   3  -4   20.36    1.55   1
  -1   3  -4   23.27    2.81   7
   1  -3   4   23.76    2.36   4
  -1   3  -4   22.96    3.12   3
   1  -3   4   21.78    1.87   5
   2  -3   4   -0.21    0.79   5
  -2   3  -4   -0.01    0.64   1
   2  -3   4    0.34    0.58   1
   2  -3   4   -0.11    0.80   1
   2  -3   4   -0.64    0.63   2
   3  -3   4   73.86    5.00   1
   3  -3   4   66.73    5.26   2
   3  -3   4   65.25   10.20   4
  -3   3  -4   54.65    5.17   4
  -3   3  -4   67.50    4.86   1
   3  -3   4   71.42    4.84   1
  -3   3  -4   63.92    4.99   1
   4  -3   4  201.77   13.86   1
  -4   3  -4  170.94   15.01   1
   4  -3   4  178.52   14.01   4
  -4   3  -4  184.74   14.92   1
   4  -3   4  191.79   12.96   1
   5  -3   4    3.35    1.86   1
  -5   3  -4    3.72    2.05   1
   5  -3   4    4.67    1.35   4
   6  -3   4    3.41    1.30   1
   6  -3   4    3.93    1.38   1
  -6   3  -4    3.87    1.18   1
   7  -3   4   42.90    4.69   4
  -7   3  -4   44.27    3.60   1
   8  -3   4   -0.43    1.73   4
   8  -3   4    2.10    1.87   1
  -8   3  -4    1.47    1.25   1
  -9   3  -4   57.33    5.34   1
   9  -3   4   66.88    6.23   1
   9  -3   4   65.85    6.79   4
 -10   3  -4    3.08    2.08   1
  10  -3   4    2.53    1.68   4
  10  -3   4    0.65    1.62   1
  11  -3   4   22.33    4.75   1
  11  -3   4   26.42    2.98   4
 -11   3  -4   23.43    3.12   1
 -12   3  -4   -0.53    1.86   1
  12   2  -4    3.72    2.94   1
 -12  -2   4    1.71    3.02   1
 -12  -2   4    2.38    1.83   3
  11   2  -4   33.93    4.06   1
 -11  -2   4   40.60    4.37   1
 -11  -2   4   43.42    4.87   3
  10   2  -4   38.96    4.62   1
 -10  -2   4   30.04    3.75   3
 -10  -2   4   30.85    3.56   1
  -9  -2   4    9.92    2.14   1
   9   2  -4    7.10    1.13   4
  -9  -2   4    7.85    1.84   3
   9   2  -4   10.27    2.06   1
  -8  -2   4   30.07    3.25   1
  -8  -2   4   33.38    3.11   3
  -7  -2   4    2.61    1.18   1
   7   2  -4    0.23    1.37   1
  -6  -2   4   -0.23    1.02   1
  -6  -2   4    1.08    1.15   1
   6   2  -4   -0.22    0.94   1
   5   2  -4    2.28    0.78   1
   5   2  -4   -0.32    0.80   1
  -5  -2   4    1.45    1.11   3
  -5  -2   4    0.75    0.98   1
  -4  -2   4   64.80    4.62   3
   4   2  -4   58.56    4.56   1
  -4  -2   4   62.61    4.92   1
   4   2  -4   63.20    4.56   1
  -3  -2   4  102.36    7.26   1
  -3  -2   4  117.78    9.24   1
   3   2  -4  128.61    7.67   1
   3   2  -4  122.13    7.83   1
  -3  -2   4  117.30    8.32   3
   2   2  -4 1031.35   68.08   1
  -2  -2   4 1211.54   73.71   3
   2   2  -4 1023.18   77.05   1
  -2  -2   4  924.36   71.35   1
  -2  -2   4 1294.64  213.53   6
  -2  -2   4 1295.93  136.68   7
  -2  -2   4  949.86   65.70   1
   2   2  -4 1037.62   71.70   3
  -1  -2   4  423.40   26.52   3
   1   2  -4  390.59   27.46   1
  -1  -2   4  425.77   31.25   1
   1   2  -4  471.97   37.63   7
   1   2  -4  399.09   27.78   1
   1   2  -4  444.01   28.99   5
   1   2  -4  365.87   27.10   3
  -1  -2   4  472.53   32.27   7
   0   2  -4 9018.58  581.14   3
   0   2  -4 7201.37  520.79   7
   0  -2   4 8807.95  567.49   7
  -1   2  -4   49.82    3.79   4
  -1   2  -4   43.57    4.03   5
  -1   2  -4   40.99    7.57   2
  -1   2  -4   39.80    3.03   1
  -1   2  -4   40.36    4.19   3
   1  -2   4   40.60    3.84   5
  -2   2  -4   75.49    5.12   1
   2  -2   4   74.95    5.99   4
  -2   2  -4   81.58    6.46   1
  -2   2  -4   84.11    6.10   4
   2  -2   4   78.82    5.25   1
   2  -2   4   80.63    9.30   5
   2  -2   4   75.52    4.88   1
   3  -2   4   21.12    2.48   4
  -3   2  -4   19.87    1.88   1
   3  -2   4   19.82    2.14   2
  -3   2  -4   25.43    1.97   1
  -3   2  -4   18.77    2.09   4
   3  -2   4   24.98    2.27   1
   4  -2   4  182.54   12.94   1
  -4   2  -4  186.73   13.17   1
  -4   2  -4  168.21   14.75   1
   4  -2   4  174.84   12.99   4
  -4   2  -4  211.85   29.92   4
   4  -2   4  168.53   13.51   1
  -5   2  -4   -0.31    1.49   1
  -5   2  -4    2.83    1.71   1
   5  -2   4   -0.58    0.95   4
   5  -2   4   -1.44    1.12   1
   5  -2   4    1.95    0.96   1
   6  -2   4    9.61    1.79   1
  -6   2  -4    4.19    1.62   1
   6  -2   4    6.90    1.22   4
   7  -2   4  121.44    7.99   1
  -7   2  -4  142.13    9.40   1
   7  -2   4  108.73    9.14   4
   8  -2   4   33.09    4.49   1
  -8   2  -4   48.29    4.36   1
   8  -2   4   39.49    3.85   4
   9  -2   4    0.32    1.50   1
   9  -2   4   -0.18    1.17   4
  10  -2   4   30.04    4.56   1
 -10   2  -4   37.94    4.55   1
  10  -2   4   38.38    3.99   4
 -11   2  -4   13.42    3.12   1
  12  -2   4    4.18    2.24   1
  12   1  -4    4.47    2.86   1
 -12  -1   4    2.43    2.31   1
 -12  -1   4    1.68    2.01   3
  11   1  -4    8.07    2.49   1
 -11  -1   4   10.81    2.42   1
   9   1  -4  153.64   14.82   4
  -9  -1   4  169.09   13.64   1
   8   1  -4   -0.45    1.17   1
  -8  -1   4   -0.84    1.34   1
   7   1  -4   17.13    2.46   1
   6   1  -4   52.01    5.07   1
  -6  -1   4   59.40    5.64   1
  -5  -1   4    3.25    1.31   1
   5   1  -4    3.54    1.14   1
  -5  -1   4    4.74    1.49   1
   5   1  -4    3.74    1.67   1
  -4  -1   4  220.90   12.06   1
  -4  -1   4  179.51   12.85   1
   4   1  -4  193.94   11.92   1
   4   1  -4  181.25   13.36   1
   3   1  -4   15.07    1.70   1
   3   1  -4   13.65    1.43   1
  -3  -1   4   11.98    1.91   1
  -2  -1   4  211.97   15.82   3
  -2  -1   4  265.02   44.78   6
  -2  -1   4  231.77   15.23   1
   2   1  -4  209.18   14.67   1
   2   1  -4  216.66   14.97   1
  -2  -1   4  238.22   14.82   1
   1   1  -4   13.81    1.37   1
   1   1  -4   12.78    1.34   1
  -1  -1   4   15.35    2.07   7
  -1  -1   4   13.04    1.25   1
  -1  -1   4   12.49    1.84   3
  -1  -1   4   16.89    1.78   6
   1   1  -4   14.02    2.05   6
  -1  -1   4   13.78    1.21   1
   1   1  -4   13.33    1.55   7
   0  -1   4   58.54    4.14   1
   0  -1   4   60.06    4.59   5
   0   1  -4   59.32    4.58   3
   0   1  -4   30.87   19.57   1
   0   1  -4   54.68    3.58   1
   0  -1   4   59.47    5.08   7
   0   1  -4   58.75    3.82   5
   0  -1   4   61.83    4.74   3
   0   1  -4   63.46    4.41   7
  -1   1  -4  303.34   21.22   1
  -1   1  -4  280.42   19.12   1
   1  -1   4  310.59   20.91   3
  -1   1  -4  279.31   60.83   2
  -1   1  -4  272.09   19.00   3
   1  -1   4  264.02   17.47   1
   1  -1   4  318.89   23.33   5
  -1   1  -4  358.92   28.61   5
  -2   1  -4  104.88    9.50   4
  -2   1  -4  135.78   12.49   3
  -2   1  -4  117.31    7.35   1
   2  -1   4  112.88    7.41   1
   2  -1   4  111.26    7.99   4
   2  -1   4  105.68    7.28   1
   3  -1   4  159.12   10.65   1
  -3   1  -4  164.40   12.36   4
  -3   1  -4  190.28   11.16   1
   3  -1   4  172.07   12.80   4
   3  -1   4  156.16   12.22   1
  -3   1  -4  163.93   12.11   1
  -4   1  -4    0.96    0.75   1
   4  -1   4    1.42    1.13   4
   4  -1   4    0.68    0.74   1
  -4   1  -4    1.92    0.84   4
   4  -1   4    3.65    1.80   1
  -4   1  -4   -0.99    4.30   1
  -5   1  -4   53.11    4.29   1
   5  -1   4   58.65    4.36   1
  -5   1  -4   53.38    4.19   1
   5  -1   4   54.01    3.78   1
   5  -1   4   49.94    4.60   4
   6  -1   4    5.28    1.79   1
   6  -1   4    1.94    1.21   4
   6  -1   4    3.75    1.85   1
   7  -1   4  102.16    6.93   1
  -7   1  -4   88.89    7.65   1
   7  -1   4   97.65    7.97   4
   8  -1   4   18.82    2.68   4
  -8   1  -4   15.62    3.34   1
   9  -1   4  130.38    9.74   1
  -9   1  -4  132.35   12.64   1
   9  -1   4  118.04   11.42   4
  10  -1   4   46.83    4.74   4
 -10   1  -4   48.74    5.65   1
  10  -1   4   55.18    6.07   1
  11  -1   4   33.33    4.17   1
  12  -1   4    0.31    2.00   1
  12   0  -4   12.01    3.05   1
 -11   0   4    6.11    2.23   1
  10   0  -4    0.83    0.73   4
 -10   0   4    0.02    1.55   1
  -9   0   4   97.59    8.52   1
  -8   0   4   23.02    3.19   1
   7   0  -4    0.18    1.61   1
  -7   0   4    0.07    1.20   1
   6   0  -4   52.06    4.13   1
  -6   0   4   49.32    4.06   1
  -6   0   4   43.01    4.65   1
  -5   0   4  107.08    7.95   1
  -5   0   4  106.13    8.22   1
   5   0  -4  117.54    8.73   1
   4   0  -4  370.24   28.05   1
  -4   0   4  353.47   23.44   1
   4   0  -4  378.35   23.92   1
  -4   0   4  294.33   22.82   1
  -3   0   4   23.20    2.20   1
   3   0  -4   25.44    2.57   1
  -3   0   4   21.71    1.95   1
  -2   0   4  175.13   12.55   1
  -2   0   4  196.38   12.45   1
   2   0  -4  201.95   11.85   1
   2   0  -4  219.34   14.41   1
  -1   0   4  732.44   47.44   1
  -1   0   4  894.21   82.84   6
   1   0  -4  929.69   99.03   6
  -1   0   4  670.06   52.30   1
   1   0  -4  669.07   51.61   1
   1   0  -4  784.65   51.34   1
   0   0   4  455.48   29.13   1
   0   0   4  508.52   33.08   5
   0   0  -4  423.66   27.95   1
   0   0  -4  380.38   24.09   5
   0   0   4  395.01   27.50   1
   0   0  -4  360.26   27.83   7
   0   0   4  494.58   30.08   7
   0   0   4  481.98   31.21   3
   0   0  -4  411.82   26.67   1
  -1   0  -4   23.38    2.17   5
  -1   0  -4   22.05    1.58   1
   1   0   4   19.63    1.65   3
  -1   0  -4   22.64    1.57   1
   1   0   4   20.87    2.02   5
   1   0   4   19.51    1.68   1
   1   0   4   24.91    1.82   1
  -2   0  -4    7.62    0.85   3
   2   0   4   10.47    1.13   1
  -2   0  -4    8.26    1.10   1
  -2   0  -4    8.04    1.64   4
  -3   0  -4   37.23    3.09   1
  -3   0  -4   39.88    3.34   4
  -3   0  -4   38.54    3.25   1
   3   0   4   42.04    2.96   1
   3   0   4   35.61    3.51   4
  -4   0  -4  233.39   16.28   1
   4   0   4  256.80   15.88   1
   4   0   4  244.21   16.12   1
  -4   0  -4  263.04   17.45   4
   4   0   4  262.62   20.48   4
   5   0   4  252.20   16.16   1
   5   0   4  241.90   17.23   4
  -5   0  -4  239.24   16.36   1
  -5   0  -4  233.84   16.77   4
  -5   0  -4  258.09   15.66   1
   5   0   4  261.07   15.52   1
   6   0   4   -0.33    1.23   4
   6   0   4   -1.43    1.13   1
  -6   0  -4    1.76    1.67   1
  -7   0  -4   56.81    4.72   1
   7   0   4   56.42    4.28   4
  -8   0  -4    3.37    1.33   1
   8   0   4    4.56    1.81   4
   8   0   4    4.32    1.58   1
  -9   0  -4    0.01    1.50   1
   9   0   4    0.32    1.22   4
   9   0   4    1.59    1.56   1
  10   0   4   61.50    5.94   1
  10   0   4   49.18    4.67   4
  11   0   4    3.16    2.00   1
 -12   0  -4    6.73    2.58   1
  12  -1  -4    8.43    3.58   1
  11  -1  -4    6.66    3.26   1
 -11   1   4    1.65    2.89   1
 -10   1   4    4.83    1.89   1
  10  -1  -4    6.99    1.57   4
  10  -1  -4    4.91    2.03   1
  -9   1   4  104.04    9.00   1
   8  -1  -4  125.53    9.23   1
  -8   1   4  106.62    8.29   1
   7  -1  -4    2.28    1.68   1
   6  -1  -4  168.00   11.41   1
  -6   1   4  163.02   11.32   1
  -5   1   4   12.77    2.03   1
  -5   1   4   14.47    1.60   1
   5  -1  -4   11.05    2.01   1
  -4   1   4  654.26   42.21   1
   4  -1  -4  666.73   39.28   1
  -4   1   4  637.79   41.73   1
   4  -1  -4  634.28   44.37   1
   3  -1  -4   39.16    3.41   1
  -3   1   4   36.22    2.97   1
   3  -1  -4   39.39    3.01   1
  -3   1   4   41.47    3.07   1
   2  -1  -4    3.40    0.88   1
  -2   1   4    3.15    1.22   1
   1  -1  -4  130.33    9.32   1
   1  -1  -4  143.42    9.03   1
  -1   1   4  143.67    9.49   1
  -1   1   4  137.32    9.70   1
  -1   1   4  133.39    9.37   6
   0  -1  -4   26.40    1.80   7
   0  -1  -4   24.63    1.71   5
   0  -1  -4   21.84    1.87   1
   0   1   4   21.26    1.66   5
  -1  -1  -4   16.32    1.30   1
   1   1   4   20.41    8.88   1
   1   1   4   15.93    1.59   5
   1   1   4   16.17    1.44   1
  -2  -1  -4  172.57   12.11   1
   2   1   4  177.53   10.65   1
  -2  -1  -4  174.56   11.02   1
   2   1   4  177.83   10.82   1
   2   1   4  173.25   11.10   3
   3   1   4   39.09    2.86   1
  -3  -1  -4   36.59    3.00   1
  -3  -1  -4   40.84    2.66   3
  -3  -1  -4   40.85    3.28   4
  -4  -1  -4  327.62   18.98   1
   4   1   4  262.80   20.61   1
   4   1   4  320.60   18.03   1
  -4  -1  -4  307.24   19.55   1
  -4  -1  -4  310.14   22.78   4
  -5  -1  -4   71.84    5.38   4
   5   1   4   72.25    6.30   4
   5   1   4   75.79    5.66   1
   5   1   4   90.75    6.39   1
  -5  -1  -4   74.62    6.31   1
  -5  -1  -4   81.99    7.19   1
   6   1   4  135.13   10.08   1
   6   1   4  142.32   11.85   1
   6   1   4  152.13   10.52   4
   7   1   4   75.20    5.73   4
   7   1   4   79.35    5.83   1
   8   1   4   93.19    7.04   1
  -8  -1  -4   79.68    6.23   1
   8   1   4   93.49    7.21   4
   9   1   4   18.16    2.14   4
  -9  -1  -4   17.53    2.40   1
   9   1   4   19.68    3.09   1
 -10  -1  -4    3.01    1.66   1
  11   1   4    1.39    1.92   1
  12   1   4   -2.22    2.10   1
 -13  -1  -4    3.68    2.59   1
  13   1   4    5.04    2.47   1
  12  -2  -4   -2.31    2.05   1
 -12   2   4    0.91    2.05   1
  11  -2  -4   39.64    4.92   1
 -11   2   4   28.60    4.16   1
 -10   2   4    6.05    3.45   1
  10  -2  -4    9.19    2.35   1
  10  -2  -4    7.81    1.96   4
  -9   2   4    9.39    3.54   1
  -8   2   4   -1.67    1.85   1
   8  -2  -4    2.16    1.51   1
  -6   2   4    5.76    1.34   1
   5  -2  -4   13.50    1.91   1
  -5   2   4   15.36    2.06   1
  -5   2   4   11.61    1.68   1
  -4   2   4  441.89   27.53   1
   4  -2  -4  433.01   26.06   1
  -4   2   4  397.41   27.74   1
   4  -2  -4  389.56   29.58   1
   3  -2  -4   -0.03    0.66   1
  -3   2   4    0.11    0.66   1
   3  -2  -4   -0.57    0.80   1
  -3   2   4    0.62    1.40   1
   2  -2  -4  489.87   46.42   1
  -2   2   4  520.45   33.58   1
   2  -2  -4  498.07   34.06   1
  -2   2   4  524.82   31.41   1
  -1   2   4    3.77    1.64   1
  -1   2   4    6.18    0.70   6
  -1   2   4    7.57    1.09   1
   0  -2  -4  975.41   60.87   1
   0  -2  -4 1007.01   64.37   1
   0   2   4 1067.84   66.57   1
   0  -2  -4  977.91   59.29   5
   1   2   4   23.58    1.94   1
  -1  -2  -4   24.61    2.33   1
   1   2   4   29.22    8.55   1
   1   2   4   22.71    1.95   5
  -2  -2  -4   73.17    4.92   1
   2   2   4   73.69    5.01   1
   2   2   4   62.34    4.88   1
  -2  -2  -4   66.07    4.91   1
  -3  -2  -4  511.48   36.31   1
  -3  -2  -4  660.67   38.07   1
   3   2   4  611.06   37.53   1
   3   2   4  649.57   37.36   1
  -4  -2  -4    2.85    0.77   4
  -4  -2  -4    1.44    1.27   1
  -4  -2  -4    0.51    0.75   1
   4   2   4    1.68    1.00   1
   4   2   4    0.77    0.79   1
  -5  -2  -4  189.82   11.02   3
  -5  -2  -4  186.92   11.82   1
  -5  -2  -4  181.90   12.02   1
  -5  -2  -4  171.05   11.96   4
   5   2   4  175.05   11.63   1
   6   2   4   10.20    1.43   1
  -6  -2  -4    9.15    1.94   1
   6   2   4   12.99    2.48   1
  -7  -2  -4  100.97    8.40   1
   7   2   4  143.42    8.37   1
   8   2   4    5.53    2.46   1
   9   2   4    0.38    1.53   1
  -9  -2  -4   -0.25    1.42   1
  10   2   4   46.43    5.05   1
 -10  -2  -4   47.52    3.92   3
 -11  -2  -4   21.03    3.26   1
  12   2   4    6.79    3.00   1
 -13  -2  -4    2.76    2.10   1
  13   2   4    0.43    2.06   1
  11  -3  -4    7.59    3.00   1
  10  -3  -4    8.68    2.12   4
 -10   3   4    5.93    2.67   1
   9  -3  -4   53.13    6.16   4
  -9   3   4   59.64    6.37   1
   9  -3  -4   48.61    5.32   1
   8  -3  -4   32.04    4.60   1
  -8   3   4   36.07    3.83   1
  -7   3   4  710.33   44.53   1
   7  -3  -4  628.55   43.05   1
   6  -3  -4  200.46   15.50   1
  -6   3   4  206.57   14.34   1
   5  -3  -4   58.01    4.40   1
  -5   3   4   50.86    4.27   1
   4  -3  -4  293.06   25.70   1
   4  -3  -4  266.77   16.28   1
  -4   3   4  243.38   17.00   1
  -4   3   4  262.04   17.15   1
   3  -3  -4   34.73    3.49   1
  -3   3   4   34.48    2.61   1
  -3   3   4   40.91    2.85   1
   3  -3  -4   27.39    3.27   1
   2  -3  -4   62.72    4.36   1
  -2   3   4   70.48    4.67   1
  -2   3   4   57.46    4.57   1
   1  -3  -4  260.04   16.56   1
   1  -3  -4  261.35   16.75   1
  -1   3   4  246.97   16.84   1
   0   3   4  567.16   37.70   7
   0   3   4  544.08   37.25   1
   0  -3  -4  562.43   34.27   5
   0  -3  -4  582.46   33.76   1
   1   3   4  160.94   10.43   1
  -1  -3  -4  163.93   12.55   7
  -1  -3  -4  165.99   11.15   1
   1   3   4  166.20   11.46   5
  -2  -3  -4  349.70   22.29   1
  -2  -3  -4  349.01   22.98   2
  -2  -3  -4  336.04   22.47   1
   2   3   4  347.79   22.48   1
   2   3   4  339.39   21.14   1
  -3  -3  -4   23.23    2.34   1
   3   3   4   25.38    2.12   1
   3   3   4   22.82    1.51   3
   3   3   4   22.18    2.06   1
  -4  -3  -4   18.44    2.66   1
   4   3   4   16.26    2.51   1
   4   3   4   19.97    1.93   1
  -4  -3  -4   21.96    2.68   1
  -5  -3  -4   17.97    1.50   4
   5   3   4   17.71    2.09   1
  -5  -3  -4   18.05    2.05   1
  -5  -3  -4   18.37    3.01   1
   5   3   4   16.83    1.87   1
  -6  -3  -4   68.45    4.23   3
   6   3   4   76.69    5.20   1
  -6  -3  -4   65.14    5.10   1
  -6  -3  -4   69.48    7.63   1
  -6  -3  -4   77.80    5.47   4
  -7  -3  -4   -0.17    1.78   1
   7   3   4   -1.07    1.64   1
  -8  -3  -4   50.92    4.36   1
   8   3   4   45.00    4.67   1
  -8  -3  -4   54.68    3.49   3
  -9  -3  -4   31.44    2.94   3
  -9  -3  -4   38.52    3.81   1
   9   3   4   31.47    3.58   1
 -10  -3  -4   35.24    3.61   1
 -10  -3  -4   40.84    3.96   3
  11   3   4   13.45    3.74   1
  12   3   4    0.32    2.54   1
 -13  -3  -4   14.04    3.26   1
  13   3   4   11.21    3.40   1
 -11   4   4    2.90    2.08   1
  11  -4  -4   -0.67    1.90   1
 -10   4   4    4.72    3.14   1
  10  -4  -4    4.74    3.56   1
   9  -4  -4   30.95    6.72   1
   9  -4  -4   32.90    4.31   4
  -9   4   4   41.48    4.61   1
   8  -4  -4    2.88    2.56   1
  -8   4   4    6.64    2.81   1
   7  -4  -4   14.34    2.83   1
  -7   4   4   11.64    3.54   1
   6  -4  -4    7.17    1.69   1
  -5   4   4   -0.67    1.12   1
   5  -4  -4   -0.21    1.20   1
   4  -4  -4   46.51    3.76   1
  -4   4   4   51.65    4.62   1
   4  -4  -4   48.85    3.93   1
   3  -4  -4  218.68   13.22   1
  -3   4   4  183.18   12.41   1
   3  -4  -4  192.64   12.73   1
  -3   4   4  199.35   12.20   1
  -2   4   4  978.73   91.14   1
   2  -4  -4  968.65   68.64   1
   2  -4  -4 1039.48   62.88   1
  -2   4   4 1013.29   62.45   1
  -1   4   4  593.31   41.03   1
   1  -4  -4  666.96   39.02   1
  -1   4   4  636.86   43.05   1
   1  -4  -4  547.34   41.74   1
   0  -4  -4   26.40    2.40   1
   0   4   4   28.69    2.51   7
   0  -4  -4   33.74    2.35   1
   0   4   4   29.92    2.94   1
   1   4   4 1065.36   67.91   1
  -1  -4  -4 1171.40   73.45   1
  -1  -4  -4 1109.11   81.38   7
   1   4   4 1092.71   72.04   5
   1   4   4 1139.92   74.20   1
  -2  -4  -4  328.43   20.00   1
  -2  -4  -4  319.95   20.36   2
  -2  -4  -4  251.35   22.35   1
   2   4   4  383.80  110.52   1
   2   4   4  307.09   18.71   1
   3   4   4  303.19   18.66   1
  -3  -4  -4  296.65   18.15   1
   3   4   4  296.45   20.48   1
  -3  -4  -4  306.58   18.77   1
   4   4   4   42.93    2.85   3
  -4  -4  -4   45.95    3.46   1
  -4  -4  -4   40.00    3.45   1
   4   4   4   39.97    3.74   1
   4   4   4   41.90    3.44   1
  -5  -4  -4   41.40    3.43   1
  -5  -4  -4   49.73    4.36   1
   5   4   4   41.26    3.99   1
  -6  -4  -4  295.39   18.31   1
  -6  -4  -4  282.29   20.02   1
  -6  -4  -4  279.38   19.46   4
   6   4   4  292.02   18.89   1
  -7  -4  -4  215.73   15.40   1
   7   4   4  194.98   15.78   1
  -7  -4  -4  208.53   13.63   3
   8   4   4   17.88    3.19   1
  -8  -4  -4   21.08    1.48   3
   9   4   4   39.04    4.02   1
  -9  -4  -4   33.84    5.35   1
  -9  -4  -4   31.92    2.26   3
 -10  -4  -4  100.64   13.54   3
 -10  -4  -4  116.38    9.39   1
  10   4   4  103.46   10.73   1
 -11  -4  -4    8.42    2.20   1
 -12  -4  -4    2.42    1.93   1
  13   4   4   21.51    4.78   1
  11  -5  -4   -1.01    2.07   1
 -11   5   4   -3.15    2.76   1
 -10   5   4    0.96    1.86   1
  10  -5  -4   -1.09    1.33   4
   9  -5  -4    2.40    1.89   4
   9  -5  -4    2.62    1.87   1
  -9   5   4    1.29    1.58   1
   8  -5  -4   29.69    5.40   1
  -8   5   4   23.61    3.61   1
   7  -5  -4    1.31    1.42   1
  -7   5   4    3.19    2.28   1
   6  -5  -4    0.72    1.20   1
  -6   5   4   -2.30    1.39   1
  -5   5   4  113.61    8.88   1
   5  -5  -4  103.29    9.00   1
  -4   5   4   46.11    3.36   1
   4  -5  -4   32.83    4.89   1
   4  -5  -4   38.77    3.71   1
   3  -5  -4 1378.82   82.01   1
  -3   5   4 1287.12   72.95   1
   3  -5  -4 1097.09   80.67   1
   2  -5  -4  491.19   29.51   1
  -2   5   4  521.70   35.66   1
  -2   5   4  482.33   38.88   1
   2  -5  -4  477.79   29.52   1
   1  -5  -4   14.28    2.24   1
  -1   5   4   14.59    1.95   1
   1  -5  -4   11.40    1.78   1
  -1   5   4   14.62    2.06   1
  -1   5   4   17.38    1.61   7
   0   5   4  251.58   16.79   7
   0  -5  -4  242.05   15.99   1
   0   5   4  275.63   17.29   1
   0   5   4  215.17   20.19   1
   0  -5  -4  266.50   17.68   1
   1   5   4   67.32    5.01   1
  -1  -5  -4   49.30   14.27   1
  -1  -5  -4   65.09    4.96   6
  -1  -5  -4   66.44    5.31   7
   1   5   4   60.73    4.14   1
   1   5   4   61.97    4.26   7
  -2  -5  -4  153.99   10.16   7
   2   5   4  174.33   67.08   1
  -2  -5  -4  139.65   10.68   1
  -2  -5  -4  159.21   10.68   1
   2   5   4  132.45   10.36   1
  -2  -5  -4  134.66    8.31   2
  -3  -5  -4  106.73    9.09   1
   3   5   4  112.62    7.72   1
   3   5   4  121.35    7.74   1
  -3  -5  -4  114.98    8.56   1
   4   5   4   14.38    2.01   1
   4   5   4   11.05    1.26   2
  -4  -5  -4   13.72    1.96   1
   4   5   4   13.10    1.23   3
  -4  -5  -4   12.24    2.35   1
   5   5   4   31.53    2.74   1
   5   5   4   31.94    2.53   1
   5   5   4   29.05    2.14   3
  -5  -5  -4   27.32    2.78   1
  -5  -5  -4   27.07    3.42   1
  -6  -5  -4    8.58    1.50   1
  -6  -5  -4    6.24    1.53   1
  -6  -5  -4    8.22    0.68   4
   6   5   4    5.16    1.87   1
   7   5   4   18.56    2.69   1
  -7  -5  -4   16.90    2.42   1
  -8  -5  -4    5.43    1.85   1
   8   5   4    2.33    1.48   1
  -9  -5  -4    1.75    1.38   1
   9   5   4    0.00    1.45   1
  10   5   4   16.84    3.29   1
  11   5   4   34.85    3.94   1
  12   5   4    4.95    2.36   1
 -12  -5  -4    4.26    2.84   1
 -13  -5  -4   25.49    4.90   1
  13   5   4   18.61    3.55   1
  10  -6  -4    0.99    1.83   1
  10  -6  -4   -1.43    1.61   4
 -10   6   4    2.85    2.05   1
   9  -6  -4    2.65    2.53   4
  -9   6   4   -0.21    1.64   1
   9  -6  -4    2.21    1.93   1
  -8   6   4    6.08    1.87   1
   8  -6  -4   10.52    2.73   1
  -7   6   4   97.93    9.36   1
   7  -6  -4  111.32    8.21   1
   6  -6  -4   10.61    1.95   1
  -6   6   4   11.04    2.61   1
  -4   6   4   13.34    3.03   1
   4  -6  -4   10.79    2.24   1
  -3   6   4   78.72    5.55   1
   3  -6  -4   76.62    6.11   1
   3  -6  -4   70.52    7.33   1
   2  -6  -4   15.90    1.89   1
   2  -6  -4   14.52    2.23   1
  -2   6   4   10.77    2.03   1
   1  -6  -4  176.74   12.56   1
   1  -6  -4  217.49   13.27   1
  -1   6   4  200.38   17.64   1
  -1   6   4  196.41   13.71   1
  -1   6   4  197.86   16.83   7
   0  -6  -4  103.24    8.68   1
   0   6   4  114.84    8.84   7
   0  -6  -4  114.75    7.17   1
   0   6   4  122.13    8.90   1
   0   6   4  117.45    8.02   1
   1   6   4  254.83   16.99   7
   1   6   4  261.06   17.28   1
  -1  -6  -4  278.40   47.86   1
  -1  -6  -4  249.05   16.23   1
   1   6   4  258.62   17.79   1
  -1  -6  -4  248.12   17.81   7
   2   6   4   47.55    3.55   1
  -2  -6  -4   54.48    4.20   1
   2   6   4   53.81    4.34   1
  -2  -6  -4   45.09    3.76   1
  -2  -6  -4   51.80    3.97   7
   3   6   4  132.51    8.41   1
  -3  -6  -4  118.81    9.57   7
   3   6   4  137.60   53.51   1
  -3  -6  -4  130.65    9.55   1
  -3  -6  -4  110.37    8.19   1
  -4  -6  -4  244.46   16.59   1
  -4  -6  -4  204.27   19.64   1
   4   6   4  219.49   14.36   3
   4   6   4  236.38   15.80   1
   4   6   4  207.81   15.24   1
   5   6   4   35.86    2.32   3
  -5  -6  -4   29.15    3.91   1
   5   6   4   34.47    2.86   1
   6   6   4   23.13    2.43   1
  -6  -6  -4   29.64    3.36   1
   6   6   4   19.86    2.06   3
  -6  -6  -4   28.51    3.72   1
   7   6   4   92.44    6.72   1
  -7  -6  -4   89.51    8.49   1
   8   6   4  419.44   28.27   1
  -9  -6  -4  187.44   13.85   1
   9   6   4  194.10   14.26   1
  11   6   4    9.17    2.56   1
 -11  -6  -4    6.02    2.06   1
  12   6   4    8.23    3.30   1
 -13  -6  -4    3.24    2.23   1
  13   6   4   -1.53    2.10   1
  10  -7  -4   10.81    2.52   4
  10  -7  -4   13.12    3.81   1
 -10   7   4    7.04    2.92   1
   9  -7  -4   54.83    6.60   4
   9  -7  -4   52.95    6.19   1
  -9   7   4   51.12    6.68   1
   8  -7  -4   23.49    4.04   4
  -8   7   4   22.04    3.33   1
  -6   7   4   15.60    2.53   1
   6  -7  -4   18.26    3.59   1
   5  -7  -4    2.21    1.69   1
   4  -7  -4   -0.64    0.99   1
  -4   7   4    1.35    1.62   1
   3  -7  -4  154.88   11.87   1
   3  -7  -4  187.28   12.51   1
  -3   7   4  193.87   12.47   1
   2  -7  -4   11.27    2.37   1
   2  -7  -4    9.03    1.73   1
  -1   7   4    2.82    1.40   1
   1  -7  -4    2.02    1.35   1
   1  -7  -4   -0.76    1.45   1
  -1   7   4    1.75    1.23   7
   1  -7  -4    1.59    0.48   5
  -1   7   4    1.19    0.43   6
   0   7   4   45.06    4.05   7
   0   7   4   45.51    4.20   1
   0  -7  -4   49.03    3.40   1
   0   7   4   39.96    4.12   1
   0  -7  -4   48.03    5.59   1
   1   7   4    8.92    1.86   1
  -1  -7  -4   10.32    1.33   2
   1   7   4    8.97    1.54   7
  -1  -7  -4   11.90    3.57   1
  -1  -7  -4   12.94    1.80   7
   1   7   4    9.30    1.45   1
  -2  -7  -4   71.92    5.35   6
  -2  -7  -4   61.88    6.55   1
   2   7   4   76.63    5.28   5
  -2  -7  -4   75.49    6.86   1
  -2  -7  -4   87.92    5.59   7
   2   7   4   82.95    5.52   1
   2   7   4   79.70    5.77   1
  -3  -7  -4    2.63    1.77   1
   3   7   4    4.45    2.64   1
  -3  -7  -4   -0.06    0.82   1
   4   7   4  365.09   27.06   3
   4   7   4  385.65  132.86   1
  -4  -7  -4  419.39   30.68   1
  -4  -7  -4  439.33   31.35   1
  -4  -7  -4  428.33   26.81   7
  -5  -7  -4   15.37    2.46   1
   5   7   4   16.50    1.89   3
   5   7   4   21.18    1.61   2
  -5  -7  -4   22.20    2.65   1
   6   7   4    0.67    0.92   2
   6   7   4    1.22    1.32   1
   6   7   4    2.88    1.20   3
  -7  -7  -4   23.08    3.07   1
   7   7   4   15.76    2.46   1
  -8  -7  -4   41.44    4.31   1
   8   7   4   36.85    5.96   1
  -9  -7  -4   18.12    2.95   1
   9   7   4   24.82    3.49   1
  10   7   4    5.46    1.90   1
 -10  -7  -4    5.89    2.15   1
  11   7   4    9.65    2.52   1
 -12  -7  -4    5.32    2.62   1
  12   7   4    9.50    2.57   1
  13   7   4    1.37    2.12   1
   9  -8  -4   13.23    2.71   1
  -9   8   4   10.36    2.49   1
  -8   8   4   32.55    4.14   1
   8  -8  -4   33.90    4.41   1
   8  -8  -4   33.83    4.77   4
   7  -8  -4    2.81    2.03   1
  -7   8   4   -0.42    1.42   1
  -6   8   4    0.78    1.34   1
   6  -8  -4    2.45    1.50   1
   5  -8  -4    2.30    1.41   1
  -4   8   4    0.08    1.47   1
   4  -8  -4    1.08    1.14   1
  -3   8   4    5.62    2.03   1
  -3   8   4    3.49    1.36   7
   3  -8  -4    1.91    2.00   1
  -2   8   4   71.77    6.28   7
   2  -8  -4   68.15    4.08   5
   2  -8  -4   78.88    6.55   1
   2  -8  -4   53.35    6.34   1
  -2   8   4   55.45    5.94   1
   1  -8  -4   14.72    2.09   1
  -1   8   4   14.53    2.00   1
   1  -8  -4   15.79    1.51   5
  -1   8   4   16.57    2.43   7
  -1   8   4   16.34    1.39   6
   1  -8  -4   20.25    2.19   1
   0   8   4    2.96    1.38   7
   0   8   4    2.44    1.15   1
   0  -8  -4    0.22    1.14   1
   0  -8  -4    0.19    0.84   1
  -1  -8  -4    7.05    1.18   1
   1   8   4    6.69    1.26   7
   1   8   4    9.27    2.22   1
  -1  -8  -4    7.41    1.46   7
   2   8   4   18.27    2.04   1
   2   8   4   17.80    1.24   5
  -2  -8  -4   16.02    2.14   1
  -2  -8  -4   13.46    1.40   6
   3   8   4    6.10    1.98   1
  -3  -8  -4    5.90    1.85   1
  -3  -8  -4    8.75    2.53   1
  -3  -8  -4    5.91    2.18   7
   4   8   4   32.40    3.93   3
  -4  -8  -4   44.47    4.26   1
   4   8   4   39.77   14.84   1
  -4  -8  -4   47.98    5.45   7
   5   8   4  108.96    8.44   1
  -5  -8  -4  107.15    8.20   7
  -5  -8  -4  110.60    7.50   1
  -5  -8  -4  107.97    9.04   1
   5   8   4   99.46    7.64   3
   6   8   4    2.98    0.71   2
   6   8   4    2.24    0.85   3
   6   8   4   -0.41    1.77   1
  -6  -8  -4    3.69    1.77   1
   7   8   4   70.23   31.01   2
  -7  -8  -4  134.58   10.16   1
   7   8   4  124.33    9.41   3
   7   8   4  140.77    9.93   1
  -7  -8  -4  131.08    8.71   4
  -8  -8  -4    4.30    1.68   1
   8   8   4    5.66    2.33   1
   9   8   4   10.75    2.60   1
  -9  -8  -4    6.28    2.18   1
 -10  -8  -4   15.18    3.20   1
  11   8   4   12.55    4.20   1
  12   8   4   28.36    4.13   1
  -9   9   4   10.03    3.38   1
   9  -9  -4   10.37    2.83   4
   9  -9  -4    6.30    2.37   1
   8  -9  -4    4.98    3.37   1
  -8   9   4    5.63    2.69   1
   8  -9  -4    8.27    3.34   4
   7  -9  -4    7.05    2.84   4
  -7   9   4    4.75    1.86   1
   7  -9  -4    8.83    2.27   1
  -6   9   4    2.51    1.60   1
   6  -9  -4    2.61    2.00   1
   5  -9  -4   32.29    3.83   1
  -5   9   4   30.48    3.16   1
   4  -9  -4   52.26    4.04   1
  -4   9   4   43.89    3.78   1
   3  -9  -4    3.12    0.94   5
   3  -9  -4    3.46    1.85   1
  -3   9   4    2.47    1.71   1
  -2   9   4   57.88    7.79   1
   2  -9  -4   56.72    3.65   5
   2  -9  -4   60.22    5.84   1
   1  -9  -4   37.66    3.92   1
  -1   9   4   31.35    3.49   7
   1  -9  -4   34.85    3.92   1
   1  -9  -4   28.99    2.15   5
  -1   9   4   29.05    3.49   1
  -1   9   4   28.41    2.34   6
   0   9   4  379.22   31.24   7
   0   9   4  448.17   27.66   1
   0  -9  -4  404.20   25.40   1
   0  -9  -4  409.70   32.82   1
  -1  -9  -4   55.74    5.47   7
  -1  -9  -4   63.17    4.83   1
   1   9   4   53.99    4.69   1
   1   9   4   57.62    5.27   7
  -2  -9  -4  112.70    7.37   1
   2   9   4   92.88    7.32   1
  -2  -9  -4  110.56    9.62   7
  -2  -9  -4   98.49    7.94   1
   2   9   4  106.98    7.22   5
  -3  -9  -4   72.53    6.68   1
  -3  -9  -4   59.62    4.90   6
  -3  -9  -4   62.01    5.37   1
   3   9   4   67.43    5.13   5
   3   9   4   75.84    5.79   1
  -3  -9  -4   56.69    5.77   7
  -4  -9  -4    9.21    2.56   7
  -4  -9  -4   10.67    1.49   6
   4   9   4    6.00    2.73   1
   4   9   4   11.43    1.69   3
  -4  -9  -4    8.47    2.07   1
  -4  -9  -4   10.78    1.62   1
   5   9   4   16.63    2.07   3
   5   9   4   26.14    7.93   1
  -5  -9  -4   20.22    2.20   1
   6   9   4   31.47    6.38   1
  -6  -9  -4   35.63    4.29   7
  -6  -9  -4   39.53    4.82   1
  -6  -9  -4   42.87    3.47   4
   6   9   4   32.93    3.23   3
  -7  -9  -4    4.88    2.24   1
   7   9   4    4.78    1.26   3
  -7  -9  -4    2.99    0.77   4
  -7  -9  -4    4.73    1.95   7
   8   9   4   -1.12    1.44   1
   8   9   4    0.14    0.78   2
  -8  -9  -4   -0.85    1.29   1
   9   9   4    1.11    0.85   2
  -9  -9  -4   -1.88    1.38   1
   9   9   4    0.00    1.97   1
  10   9   4   -1.07    2.23   1
  11   9   4    2.53    2.02   1
 -11  -9  -4    2.01    1.89   1
 -12  -9  -4   12.51    3.09   1
  12   9   4    8.29    3.54   1
   8 -10  -4    8.89    3.01   4
  -8  10   4   12.06    3.26   1
   7 -10  -4   57.53    6.10   1
   7 -10  -4   67.43    7.54   4
  -7  10   4   63.45    6.51   1
   6 -10  -4    5.17    1.84   1
   5 -10  -4    1.78    1.63   1
  -5  10   4    2.30    1.45   1
  -4  10   4   68.60    8.33   1
   4 -10  -4   54.48    6.33   5
   4 -10  -4   72.17    6.10   1
   3 -10  -4  108.52    9.55   5
  -3  10   4  107.27    8.60   1
   3 -10  -4  127.58   10.28   1
   2 -10  -4   40.05    4.21   1
  -2  10   4   42.22    4.88   6
  -2  10   4   51.27    4.51   1
   2 -10  -4   43.13    3.60   5
   1 -10  -4   44.79    5.13   1
  -1  10   4   45.65    4.34   1
  -1  10   4   46.50    4.02   6
   1 -10  -4   54.28    4.73   1
   0 -10  -4   -1.05    1.44   1
   0  10   4    0.55    1.19   1
   0 -10  -4    0.89    1.68   1
   1  10   4   84.88    6.41   1
  -1 -10  -4   86.57    6.15   1
  -2 -10  -4    1.52    1.65   1
  -2 -10  -4    2.52    1.12   1
  -2 -10  -4    1.84    1.32   7
   2  10   4    1.61    1.35   1
  -3 -10  -4    2.24    1.30   1
  -3 -10  -4    3.60    1.19   1
   3  10   4    0.94    1.78   1
  -3 -10  -4   -0.18    2.38   7
   3  10   4    3.24    0.49   5
  -4 -10  -4    7.29    1.57   6
  -4 -10  -4    9.91    1.79   1
  -5 -10  -4   18.44    2.52   1
  -5 -10  -4   12.50    2.73   7
   5  10   4   23.32    7.03   1
   5  10   4   16.55    1.98   3
   6  10   4    3.14    1.21   3
  -6 -10  -4    4.25    1.53   1
  -6 -10  -4    2.73    1.11   4
  -7 -10  -4    8.65    2.17   7
   7  10   4    5.76    1.23   3
  -7 -10  -4    5.66    0.96   4
   7  10   4    1.93    2.43   1
  -8 -10  -4    0.50    1.78   7
   8  10   4    0.01    0.80   2
   8  10   4    1.61    1.43   1
   9  10   4    3.17    1.95   1
  -9 -10  -4    7.43    2.72   1
  10  10   4    5.10    2.83   1
  11  10   4   -0.12    1.87   1
  12  10   4    1.27    2.06   1
  -7  11   4   10.16    3.62   1
   7 -11  -4   13.73    3.49   4
   7 -11  -4   11.05    2.77   1
  -6  11   4    1.73    1.56   1
   6 -11  -4    5.65    2.43   4
   6 -11  -4    0.92    1.75   1
   5 -11  -4    4.55    2.16   1
  -5  11   4    1.81    2.43   1
   4 -11  -4    0.41    2.00   1
   4 -11  -4   -0.83    0.83   5
   3 -11  -4    2.77    0.87   5
  -3  11   4    3.35    1.88   1
   3 -11  -4    1.09    2.19   1
  -2  11   4   16.78    2.62   1
  -2  11   4   19.95    1.88   6
   2 -11  -4   15.12    1.80   5
   2 -11  -4   18.67    2.72   1
  -1  11   4   17.68    2.54   1
   0 -11  -4   51.65    4.55   1
   0  11   4   49.53    5.46   1
  -1 -11  -4  202.34   14.12   1
   1  11   4  236.24   18.03   1
  -2 -11  -4    4.25    1.59   1
  -2 -11  -4    6.58    1.90   7
   2  11   4    3.30    1.39   1
   3  11   4   51.53    3.84   5
  -3 -11  -4   62.57    6.16   7
   3  11   4   56.44    4.93   1
  -3 -11  -4   61.96    4.66   1
  -3 -11  -4   49.48    5.02   1
   4  11   4   57.36    5.00   1
   4  11   4   62.88    6.86   5
  -4 -11  -4   37.65    5.36   1
  -4 -11  -4   46.58    5.38   7
  -4 -11  -4   45.47    5.14   6
  -5 -11  -4  144.42   11.90   1
  -5 -11  -4  133.68   11.49   7
  -5 -11  -4  136.00    9.83   4
   5  11   4  140.54    9.85   1
  -6 -11  -4    6.95    3.66   7
  -6 -11  -4    9.04    1.52   4
  -7 -11  -4   30.03    2.64   4
  -7 -11  -4   26.38    5.00   7
  -7 -11  -4   36.12    3.74   1
   8  11   4    2.21    2.74   1
  -8 -11  -4    6.20    3.15   7
   9  11   4    6.92    1.98   1
  -9 -11  -4   12.14    3.46   1
 -10 -11  -4    5.13    2.74   7
  10  11   4    0.87    1.99   1
 -10 -11  -4    0.40    2.10   1
  11  11   4    0.79    1.81   1
 -11 -11  -4   -0.51    1.84   1
 -11 -11  -4   -1.41    3.16   7
  -6  12   4    4.11    2.99   1
   6 -12  -4    5.96    2.06   1
  -5  12   4    2.64    1.78   1
   5 -12  -4    4.82    2.57   4
  -4  12   4   16.00    3.17   1
   4 -12  -4   16.87    3.50   4
   4 -12  -4   18.23    2.69   1
  -3  12   4   23.18    3.88   1
   2 -12  -4   24.67    3.28   1
  -2  12   4   26.31    3.69   1
   1 -12  -4   49.61    4.63   1
  -1  12   4   62.37    7.03   1
   0  12   4   56.58    6.90   1
   0 -12  -4   60.30    5.50   1
   1  12   4   65.85    6.14   1
  -1 -12  -4   72.19    5.67   1
  -2 -12  -4   -0.21    1.36   7
  -2 -12  -4    1.21    1.42   1
   2  12   4   -2.06    1.16   1
  -3 -12  -4   35.05    4.76   1
  -3 -12  -4   38.48    3.20   1
  -3 -12  -4   30.25    4.05   7
   3  12   4   40.52    4.15   1
  -4 -12  -4    3.55    2.38   7
   4  12   4    5.57    2.63   1
  -5 -12  -4   17.29    3.67   7
  -5 -12  -4   26.05    2.68   1
  -5 -12  -4   22.96    2.53   4
   5  12   4   21.16    4.23   1
  -6 -12  -4   39.83    4.32   1
   6  12   4   35.41    4.17   1
  -6 -12  -4   38.82    3.76   4
  -6 -12  -4   32.25    4.98   7
  -7 -12  -4    6.80    3.33   1
  -7 -12  -4    7.12    3.27   7
   8  12   4   -3.80    2.68   1
  -8 -12  -4    2.74    2.97   7
  -8 -12  -4    0.60    1.52   1
  -9 -12  -4    4.65    3.02   1
  -9 -12  -4    7.01    3.48   7
 -10 -12  -4    4.16    2.46   7
  10  12   4    7.00    2.14   1
 -10 -12  -4    5.20    2.19   1
 -11 -12  -4    3.78    2.44   1
 -11 -12  -4   -5.58    3.18   7
  11  12   4   -2.67    1.80   1
   5 -13  -4    1.85    2.44   4
   5 -13  -4    6.71    2.32   1
   4 -13  -4   -0.03    2.62   4
   4 -13  -4   -0.30    1.92   1
  -4  13   4    2.56    2.24   1
  -3  13   4   24.76    3.47   1
   3 -13  -4   24.41    3.48   1
   3 -13  -4   20.45    3.32   4
   2 -13  -4   10.60    3.12   4
  -2  13   4   11.81    2.08   1
   2 -13  -4   12.25    3.33   1
   1 -13  -4    4.88    2.25   4
   1 -13  -4    7.08    2.09   1
   0 -13  -4  139.52   12.77   1
   0  13   4  128.55   18.51   1
   1  13   4   23.50    3.68   1
  -1 -13  -4   26.74    3.58   1
  -2 -13  -4  166.64   15.25   1
  -2 -13  -4  192.40   14.62   4
   2  13   4  193.93   17.18   1
  -3 -13  -4   11.38    3.40   7
  -3 -13  -4   14.56    3.00   4
   3  13   4   10.23    2.07   1
  -4 -13  -4   27.45    3.65   7
   4  13   4   25.14    3.59   1
  -4 -13  -4   31.98    4.02   1
  -4 -13  -4   31.79    3.29   4
  -5 -13  -4    4.12    2.18   7
   5  13   4    9.90    3.12   1
   6  13   4    2.98    2.11   1
  -6 -13  -4    0.61    3.60   7
  -6 -13  -4   -0.05    1.32   1
   7  13   4   -0.50    1.37   1
  -7 -13  -4   -1.90    1.93   7
  -7 -13  -4    6.02    3.00   1
  -8 -13  -4   -3.02    2.36   1
  -8 -13  -4   -2.04    2.09   7
  -9 -13  -4    3.01    1.84   1
  -9 -13  -4    0.45    3.72   7
 -10 -13  -4    3.21    3.91   7
 -10 -13  -4    7.70    3.09   1
   4 -14  -4    3.22    1.88   1
   3 -14  -4   10.77    2.68   1
   3 -14  -4    6.12    2.67   4
   2 -14  -4    1.44    2.43   1
   1 -14  -4    6.85    2.45   4
   1 -14  -4    5.06    2.10   1
  -1  14   4    5.34    2.81   1
   0 -14  -4    1.43    1.70   1
   0 -14  -4    4.32    3.03   4
   1  14   4   -1.88    1.35   1
  -1 -14  -4   -0.90    1.14   1
  -1 -14  -4    3.88    2.02   4
   2  14   4    7.34    3.35   1
  -2 -14  -4    3.27    2.11   4
  -2 -14  -4    1.13    1.77   1
   3  14   4    2.28    1.72   1
  -3 -14  -4    1.99    2.24   4
  -4 -14  -4    9.33    2.97   7
  -4 -14  -4   12.18    2.73   1
  -4 -14  -4    9.51    1.92   4
   4  14   4   13.83    2.35   1
  -5 -14  -4   23.59    3.64   4
  -5 -14  -4   17.57    4.17   7
  -5 -14  -4   17.29    2.91   1
   5  14   4   11.58    3.30   1
   6  14   4    0.60    2.29   1
  -6 -14  -4    6.38    3.64   7
   7  14   4    3.43    2.78   1
  -7 -14  -4   -1.82    3.22   7
  -7 -14  -4    0.04    1.51   1
  -8 -14  -4   -2.84    1.59   1
  -8 -14  -4    2.56    4.76   7
  -9 -14  -4   -1.73    2.36   7
  -9 -14  -4   -1.02    2.05   1
   3 -15  -4   -2.33    2.20   4
   2 -15  -4   24.36    4.53   1
   2 -15  -4   16.14    4.83   4
   1 -15  -4    5.06    2.30   1
   1 -15  -4    0.89    2.09   4
   0 -15  -4   -0.60    2.08   1
   0 -15  -4   -0.71    1.85   4
  -1 -15  -4   10.94    3.27   1
  -2 -15  -4   95.61    9.17   1
  -2 -15  -4   84.97    7.21   4
  -3 -15  -4    1.33    1.32   1
  -3 -15  -4   -0.60    1.49   4
  -3 -15  -4   -0.25    1.72   7
  -4 -15  -4   41.01    5.99   7
  -4 -15  -4   51.53    5.12   1
  -4 -15  -4   41.35    6.44   4
  -5 -15  -4   -2.57    2.03   7
  -5 -15  -4   -3.29    1.92   4
  -6 -15  -4    4.15    2.39   7
  -6 -15  -4    0.07    1.49   1
  -7 -15  -4   -1.22    3.65   7
  -7 -15  -4    3.41    2.37   1
  -8 -15  -4   13.54    4.77   7
  -8 -15  -4   10.87    2.86   1
   1 -16  -4    9.06    2.19   1
   0 -16  -4   23.83    3.87   1
  -1 -16  -4    0.56    1.96   4
  -1 -16  -4    2.73    1.82   1
  -2 -16  -4   -1.92    2.01   4
  -2 -16  -4    2.21    1.46   1
  -3 -16  -4    4.25    2.20   1
  -3 -16  -4    6.43    3.53   4
  -4 -16  -4   -3.38    1.94   7
  -4 -16  -4   -1.61    1.18   1
  -5 -16  -4    3.33    1.82   4
  -5 -16  -4    2.22    1.59   1
  -5 -16  -4   -0.82    2.03   7
  -6 -16  -4   -1.46    2.17   7
  -6 -16  -4   -0.81    1.96   1
  -7 -16  -4   -1.79    1.47   1
  -4 -16   5    1.19    3.28   7
  -4 -16   5    0.13    1.94   4
  -3 -16   5   11.64    3.35   4
  -2 -16   5   14.86    3.13   4
  -1 -16   5   21.02    3.70   4
  -7 -15   5    5.22    3.33   7
  -6 -15   5    1.84    1.16   1
  -6 -15   5    0.53    3.71   7
   6  15  -5   -1.04    1.33   2
  -5 -15   5    0.16    2.28   4
  -5 -15   5   -4.84    4.13   7
  -4 -15   5   56.62    5.76   1
  -4 -15   5   60.78    7.31   7
  -4 -15   5   56.67    7.29   4
  -3 -15   5   18.18    3.63   4
  -3 -15   5   21.87    4.92   7
  -2 -15   5   15.59    1.89   1
  -1 -15   5   18.08    3.94   4
  -1 -15   5   12.21    1.77   1
   0  15  -5   73.33    7.35   6
   0 -15   5   83.38    9.47   1
   0 -15   5   83.96    8.05   4
  -1  15  -5   14.18    3.93   6
   1 -15   5   15.65    2.10   1
   2 -15   5    3.12    2.91   4
   2 -15   5    1.59    0.88   1
  -8 -14   5    6.36    1.85   1
   8  14  -5    1.66    2.58   2
   7  14  -5    3.18    2.07   2
  -7 -14   5    3.47    1.71   1
  -7 -14   5    3.96    3.82   7
  -6 -14   5   23.98    4.44   7
  -6 -14   5   17.89    2.62   1
   6  14  -5   22.39    4.14   2
  -5 -14   5   57.91    4.64   1
  -5 -14   5   49.32    5.82   7
  -5 -14   5   40.05    6.66   4
   5  14  -5   45.19    5.28   2
  -4 -14   5   26.57    2.93   1
  -4 -14   5   34.28    6.20   7
  -4 -14   5   19.91    3.44   4
  -3 -14   5   43.87    4.04   1
  -3 -14   5   29.64    4.30   4
  -3 -14   5   36.11    5.62   7
  -2 -14   5   35.89    3.21   1
  -2 -14   5   32.23    4.21   4
  -1 -14   5   -0.73    0.89   1
  -1 -14   5    0.88    2.03   4
   0 -14   5   35.35    5.52   4
   0  14  -5   40.91    5.42   6
   0 -14   5   37.16    3.18   1
   1 -14   5   12.23    1.68   1
  -2  14  -5    2.94    1.70   6
   2 -14   5    8.84    3.45   4
   2 -14   5    2.98    1.06   1
   3 -14   5    1.67    1.35   1
  -3  14  -5   -0.40    1.32   6
   3 -14   5    6.09    4.56   4
   4 -14   5    1.81    1.71   1
  -9 -13   5   13.84    2.49   1
  -8 -13   5   24.89    5.72   7
   8  13  -5   33.35   12.71   2
  -8 -13   5   36.68    5.22   1
   7  13  -5   18.37    9.07   2
  -7 -13   5   18.39    5.27   7
  -6 -13   5    6.40    1.59   1
  -6 -13   5   10.13    2.28   4
  -5 -13   5   14.32    1.71   1
  -5 -13   5   11.95    2.36   4
  -5 -13   5   21.17    4.28   7
  -4 -13   5    8.27    2.58   4
  -4 -13   5    1.62    3.43   7
   4  13  -5    2.32    1.84   2
  -4 -13   5    7.91    1.58   1
  -3 -13   5   13.64    4.57   7
  -3 -13   5   14.95    3.86   4
  -3 -13   5   21.15    3.07   1
  -2 -13   5    9.39    2.83   7
  -2 -13   5    8.77    2.24   1
  -2 -13   5   11.97    2.47   4
   1  13  -5    0.34    1.39   6
  -1 -13   5    1.97    0.98   1
  -1 -13   5   -3.43    2.63   4
   0 -13   5    3.66    2.55   4
   0  13  -5    1.13    1.93   6
   0 -13   5    0.16    0.55   1
  -1  13  -5    4.05    2.80   6
   1 -13   5   -0.22    2.28   4
  -2  13  -5    2.60    1.69   6
   2 -13   5    5.16    1.52   5
   2 -13   5    6.85    2.81   4
   3 -13   5   24.88    3.50   1
   3 -13   5   22.65    3.14   5
   4 -13   5    8.11    1.74   1
   4 -13   5   10.37    3.52   4
   5 -13   5    7.46    1.70   1
   5 -13   5    8.23    3.02   4
 -10 -12   5   -0.38    4.10   7
 -10 -12   5    2.10    1.54   1
  -9 -12   5    7.17    2.70   1
  -9 -12   5   -0.26    3.13   7
  -8 -12   5   32.01    3.57   1
   8  12  -5   32.75    7.83   2
  -8 -12   5   22.14    4.29   7
  -7 -12   5   -2.59    4.05   7
  -7 -12   5    2.20    1.44   1
   7  12  -5    0.00    2.15   2
  -6 -12   5    1.20    4.24   7
   6  12  -5    1.14    2.26   2
  -6 -12   5    2.50    1.15   1
  -5 -12   5   10.39    5.00   7
   5  12  -5    3.39    2.44   2
   4  12  -5   20.31    2.78   2
  -4 -12   5   27.18    2.46   1
  -4 -12   5   18.29    3.62   7
   3  12  -5   11.04    2.19   2
  -3 -12   5   10.96    1.61   1
  -3 -12   5   16.95    3.22   7
  -2 -12   5    7.47    3.83   7
  -1 -12   5   68.39    4.97   1
   1  12  -5   61.05    5.82   6
  -1 -12   5   50.06    7.47   4
   0 -12   5  100.67    9.11   4
   0  12  -5   94.81    8.76   6
   0 -12   5  111.70    8.64   1
   1 -12   5   11.56    3.12   4
   1 -12   5    9.02    1.49   1
  -1  12  -5    8.97    1.83   6
   2 -12   5    4.37    2.93   4
   2 -12   5    2.29    1.58   5
   2 -12   5    5.68    1.69   1
   3 -12   5    7.47    3.62   4
   4 -12   5   62.61    5.85   1
   4 -12   5   61.15    6.79   5
   4 -12   5   71.76    7.77   4
   5 -12   5   -1.88    1.60   1
   5 -12   5   -0.27    1.14   5
   5 -12   5   -3.62    2.19   4
   6 -12   5    8.84    2.94   4
   6 -12   5    6.73    2.12   5
 -10 -11   5   41.66    6.27   1
 -10 -11   5   41.57    5.53   7
  -9 -11   5    0.72    2.39   7
  -9 -11   5    2.00    2.01   1
  -8 -11   5   20.73    2.69   1
  -8 -11   5   21.59    4.16   7
  -7 -11   5   33.90    3.61   1
  -7 -11   5   36.22    5.80   7
  -6 -11   5    2.08    1.54   1
  -6 -11   5   -3.58    3.25   7
  -5 -11   5   56.11    4.58   1
  -5 -11   5   56.68    5.84   7
  -5 -11   5   56.87    6.07   4
   5  11  -5   43.72    8.23   1
   5  11  -5   41.37   12.10   2
   4  11  -5    1.38    1.08   1
  -4 -11   5    0.39    3.56   7
  -4 -11   5   -0.27    1.32   4
   4  11  -5    0.93    1.55   2
  -4 -11   5    0.28    0.61   1
  -3 -11   5   34.96    2.76   1
  -3 -11   5   30.25    2.84   1
   3  11  -5   23.96    3.13   1
   3  11  -5   31.31    3.15   2
  -3 -11   5   38.07    4.66   7
   2  11  -5   10.62    1.52   1
  -2 -11   5   16.60    3.29   4
  -2 -11   5   12.83    1.55   1
  -2 -11   5   10.16    2.87   7
   2  11  -5   12.58    2.69   2
  -1 -11   5   12.03    1.45   1
   1  11  -5    8.77    2.23   6
   1  11  -5   11.08    1.45   1
  -1 -11   5   14.60    3.20   4
   0  11  -5    0.88    0.71   1
   0 -11   5    1.31    1.57   4
   0  11  -5    1.07    1.85   6
   0 -11   5    1.48    0.62   1
   1 -11   5   15.81    2.36   5
  -1  11  -5   20.83    3.19   1
  -1  11  -5   20.47    3.20   6
   1 -11   5   28.96    5.27   4
   1 -11   5   24.57    2.67   1
   2 -11   5    1.87    1.78   4
   2 -11   5    0.23    0.98   5
   2 -11   5    1.25    0.73   1
   3 -11   5    8.88    3.11   4
   3 -11   5    8.08    1.75   5
   4 -11   5    3.24    1.82   1
   4 -11   5    5.97    2.59   4
   4 -11   5    4.76    1.92   5
   5 -11   5   12.21    2.01   5
   5 -11   5   14.25    5.27   4
   5 -11   5    7.91    2.15   1
   6 -11   5    4.09    3.00   4
   6 -11   5    1.22    1.29   1
   6 -11   5    0.59    1.78   5
   7 -11   5    3.25    1.68   1
   7 -11   5    6.13    2.61   4
 -11 -10   5   16.15    4.54   1
 -11 -10   5   14.44    4.45   7
 -10 -10   5    1.29    1.75   1
 -10 -10   5    0.58    2.57   7
  -9 -10   5    3.72    3.03   7
  -9 -10   5    3.91    2.17   1
   8  10  -5    8.62    3.79   1
  -8 -10   5   14.10    2.17   1
  -8 -10   5   20.64    5.10   7
  -7 -10   5   59.67    4.55   1
   7  10  -5   45.75    4.99   1
  -7 -10   5   44.55    5.40   7
  -6 -10   5    3.55    1.24   1
  -6 -10   5    6.53    3.71   7
   5  10  -5    3.06    2.34   2
  -5 -10   5    6.44    1.14   1
  -5 -10   5    3.64    0.99   1
  -4 -10   5    0.23    1.86   4
  -4 -10   5   -0.27    0.56   1
  -4 -10   5   -0.10    1.23   1
   4  10  -5   -0.94    0.86   1
   4  10  -5   -1.79    2.09   2
   3  10  -5   19.24    5.76   2
  -3 -10   5   18.75    2.17   1
  -3 -10   5   12.13    4.53   7
   3  10  -5   17.22    2.00   1
  -3 -10   5   24.29    3.36   4
  -3 -10   5   17.51    1.88   1
  -2 -10   5   31.16    3.15   1
   2  10  -5   39.33    3.97   2
   2  10  -5   35.31    4.03   6
  -2 -10   5   35.92    3.93   4
  -2 -10   5   35.65    4.95   7
   2  10  -5   33.87    3.34   1
  -1 -10   5   19.01    3.56   4
  -1 -10   5   15.90    3.24   7
   1  10  -5   18.95    2.24   6
  -1 -10   5   18.81    2.06   1
   0  10  -5   18.35    1.90   1
   0 -10   5   20.23    1.95   1
   0 -10   5   16.04    2.55   4
  -1  10  -5   24.22    2.54   1
   1 -10   5   26.87    4.06   4
   1 -10   5   20.03    2.77   5
   1 -10   5   24.79    2.53   1
   2 -10   5   -1.37    1.69   4
   2 -10   5    0.49    0.61   1
  -2  10  -5    1.45    1.16   1
   2 -10   5    1.17    0.97   1
   2 -10   5    0.59    1.27   5
   3 -10   5   41.97    5.47   4
   3 -10   5   49.86    5.36   1
[truncated: 833,343 more chars]
